# Supplementary material for: Characterizing metabolic drivers of Clostridioides difficile infection with activity-based hydrazine probes
Source: Front Pharmacol. 2023 Jan 26;14:1074619. doi: 10.3389/fphar.2023.1074619 (PMC9908766; doi:10.3389/fphar.2023.1074619)
Supplement: Supplementary file 1 [file DataSheet4.xlsx]

## Sheet: Summary
Supplementary Dataset 4. Compiled average protein ratios with standard deviations for enrichment experiments with probe 2 for Clostridioides difficile VPI10463 strain cultivated in MM compared to BHIS. A representative dataset is included. This dataset is shown in a separate tab (1 in total), and displays median ReDiMe ratios for all quantified tryptic peptides per protein. Corresponding peptide …

## Sheet: Average Ratio Probe 2
Accession	description	Heavy:Light Ratio
		Average	Standard Deviation
		Probe 2 (aryl)	Probe 2 (aryl)
		Enrichment	Enrichment
			n=2
		MM:BHI	MM:BHI
WP_003422104.1	D-proline reductase (dithiol) proprotein PrdA	20	0
WP_003416871.1	glycine/sarcosine/betaine reductase component B subunit, GrdE	20	0
WP_003416023.1	phosphate propanoyltransferase	20	0
WP_003416152.1	ACT domain-containing protein	20	0
WP_003416528.1	uracil-DNA glycosylase	20	0
WP_003416556.1	translation elongation factor 4	20
WP_003416645.1	GTPase Era	20
WP_003416656.1	glycine--tRNA ligase subunit alpha	20	0
WP_003416869.1	thioredoxin-disulfide reductase	20	0
WP_003416870.1	thiol reductase thioredoxin	20	0
WP_003416938.1	NADH-quinone oxidoreductase subunit NuoF	20	0
WP_003416946.1	NAD(P)H-dependent oxidoreductase subunit E	20	0
WP_003417105.1	ATP-dependent Clp protease ATP-binding subunit ClpX	20	0
WP_003417965.1	helix-turn-helix transcriptional regulator	20	0
WP_003418348.1	AAA family ATPase	20
WP_003418356.1	dihydropteroate synthase	20	0
WP_003418359.1	CO dehydrogenase/CO-methylating acetyl-CoA synthase c	20	0
WP_003418363.1	glycine cleavage system protein GcvH	20	0
WP_003418487.1	universal stress protein	20	0
WP_003418528.1	homocitrate synthase	20	0
WP_003418638.1	glucose-1-phosphate adenylyltransferase	20	0
WP_003419037.1	VOC family protein	20	0
WP_003419125.1	enoyl- enoyl-	20	0
WP_003420072.1	NADPH-dependent glutamate synthase	20	0
WP_003420269.1	TerD family protein	20	0
WP_003420522.1	30S ribosomal protein S6	20	0
WP_003420701.1	phosphate butyryltransferase	20	0
WP_003420702.1	butyrate kinase	20	0
WP_003420710.1	MFS transporter	20	0
WP_003420721.1	UDP-N-acetylglucosamine 1-carboxyvinyltransferase	20	0
WP_003420839.1	redox-sensing transcriptional repressor Rex	20	0
WP_003420863.1	class I SAM-dependent methyltransferase	20	0
WP_003420966.1	phosphoribosylaminoimidazolesuccinocarboxamide synthase	20	0
WP_003421122.1	30S ribosomal protein S11	20	0
WP_003421354.1	transketolase	20	0
WP_003421362.1	CBS domain-containing protein	20	0
WP_003421389.1	peptide chain release factor 1	20	0
WP_003421415.1	HU family DNA-binding protein	20	0
WP_003421448.1	ribose-phosphate pyrophosphokinase	20	0
WP_003421494.1	Lrp/AsnC family transcriptional regulator	20	0
WP_003422061.1	aspartate-semialdehyde dehydrogenase	20	0
WP_003422063.1	4-hydroxy-tetrahydrodipicolinate synthase	20
WP_003422090.1	proline racemase	20	0
WP_003422094.1	D-proline reductase	20	0
WP_003422204.1	transcription elongation factor GreA	20	0
WP_003422669.1	V-type ATP synthase subunit B	20	0
WP_003422928.1	histidine--tRNA ligase	20	0
WP_003422953.1	serine hydroxymethyltransferase	20	0
WP_003423115.1	fructose-6-phosphate aldolase	20	0
WP_003423380.1	carbonic anhydrase	20
WP_003424103.1	coenzyme F420-0:L-glutamate ligase	20	0
WP_003424145.1	MTH1187 family thiamine-binding protein	20	0
WP_003425288.1	amidophosphoribosyltransferase	20	0
WP_003425290.1	5-(carboxyamino)imidazole ribonucleotide mutase	20	0
WP_003425341.1	glutamine-hydrolyzing GMP synthase	20	0
WP_003425582.1	ATP-dependent Clp protease ATP-binding subunit	20
WP_003425936.1	UDP-N-acetylmuramate--L-alanine ligase	20	0
WP_003426456.1	thioether cross-link-forming SCIFF peptide maturase	20	0
WP_003426762.1	V-type ATP synthase subunit A	20	0
WP_003426928.1	DivIVA domain-containing protein	20	0
WP_003426939.1	PFL family protein	20	0
WP_003427052.1	dipeptide ABC transporter ATP-binding protein	20	0
WP_003427105.1	aspartate--ammonia ligase	20	0
WP_003428191.1	pyridoxamine kinase	20	0
WP_003428202.1	glutamine synthetase	20	0
WP_003428216.1	ribonuclease Y	20	0
WP_003428238.1	transcription termination/antitermination protein NusA	20	0
WP_003428245.1	NAD-dependent protein deacylase	20
WP_003428488.1	electron transport complex subunit RsxC	20	0
WP_003428771.1	cyclase family protein	20	0
WP_003428889.1	carboxymuconolactone decarboxylase family protein	20	0
WP_003429004.1	ATP-binding cassette domain-containing protein	20	0
WP_003429109.1	2Fe-2S iron-sulfur cluster binding domain-containing prot	20	0
WP_003429267.1	50S ribosomal protein L9	20
WP_003429271.1	PLP-dependent aminotransferase family protein	20	0
WP_003429305.1	DNA gyrase subunit A	20	0
WP_003429308.1	ATP-binding protein	20	0
WP_003429434.1	pyridoxamine 5-phosphate oxidase family protein	20	0
WP_003429485.1	DNA-directed RNA polymerase subunit beta	20	0
WP_003430074.1	TerD family protein	20	0
WP_003430084.1	toxic anion resistance protein	20	0
WP_003430209.1	Mrp/NBP35 family ATP-binding protein	20	0
WP_003430302.1	TerD family protein	20	0
WP_003430434.1	glutamate 2,3-aminomutase	20	0
WP_003430444.1	asparagine--tRNA ligase	20	0
WP_003430579.1	aminotransferase class III-fold pyridoxal phosphate-dependent enzym	20	0
WP_003430581.1		20	0
WP_003430598.1	ribosome recycling factor	20	0
WP_003430626.1	fructose-6-phosphate aldolase	20
WP_003430704.1	transketolase	20	0
WP_003430911.1	histidine triad nucleotide-binding protein	20	0
WP_003431138.1	ribulose-phosphate 3-epimerase	20	0
WP_003431156.1	methionyl-tRNA formyltransferase	20	0
WP_003431167.1	DNA-directed RNA polymerase subunit omega	20	0
WP_003431452.1	UDP-glucose 4-epimerase GalE	20	0
WP_003431770.1	C40 family peptidase	20
WP_003431873.1	proline reductase-associated electron transfer protein Prd	20	0
WP_003432034.1	PRD domain-containing protein	20	0
WP_003432202.1	tRNA 4-thiouridine(8) synthase ThiI	20	0
WP_003432254.1	acetyl-CoA decarbonylase/synthase complex subunit delta	20	0
WP_003432462.1	methionine adenosyltransferase	20	0
WP_003433818.1	MoxR family ATPase	20	0
WP_003433836.1	radical SAM protein	20	0
WP_003433936.1	amino acid ABC transporter substrate-binding protein	20	0
WP_003433937.1	amidohydrolase	20
WP_003433939.1	amino acid ABC transporter ATP-binding protein	20	0
WP_003434033.1	thioredoxin-disulfide reductase	20
WP_003434098.1	pyrroline-5-carboxylate reductase	20	0
WP_003434148.1	triose-phosphate isomerase	20	0
WP_003434191.1	peptidylprolyl isomerase	20	0
WP_003434193.1	patatin-like phospholipase family protein	20	0
WP_003434229.1	DNA topoisomerase (ATP-hydrolyzing) subunit B	20
WP_003434259.1	adenylosuccinate synthase	20	0
WP_003434938.1	membrane dipeptidase	20
WP_003434963.1	lysine--tRNA ligase	20	0
WP_003435129.1	lactate utilization protein	20	0
WP_003435272.1	dipeptidase PepV	20
WP_003435334.1	acetyl-CoA carboxylase biotin carboxylase subunit	20	0
WP_003435338.1	ACT domain-containing protein	20	0
WP_003435562.1	serine--tRNA ligase	20	0
WP_003435581.1	glutamate--tRNA ligase	20	0
WP_003435635.1	glucose-6-phosphate isomerase	20	0
WP_003435776.1	GNAT family N-acetyltransferase	20	0
WP_003435816.1	DUF1847 domain-containing protein	20	0
WP_003435820.1	glutamine-hydrolyzing carbamoyl-phosphate synthase small subunit	20	0
WP_003435867.1	methionine--tRNA ligase	20	0
WP_003435926.1	DUF362 domain-containing protein	20	0
WP_003435963.1	molecular chaperone HtpG	20	0
WP_003436062.1	phosphoribosylamine--glycine ligase	20	0
WP_003436064.1	phosphoribosylglycinamide formyltransferase	20	0
WP_003436139.1	pyridoxal phosphate-dependent aminotransferase	20	0
WP_003436174.1	DNA-directed RNA polymerase subunit beta	20	0
WP_003436176.1	30S ribosomal protein S12	20	0
WP_003436400.1	FAD-dependent oxidoreductase	20	0
WP_003436672.1	imidazole glycerol phosphate synthase subunit HisF	20
WP_003436675.1	1-(5-phosphoribosyl)-5- 1-(5-phosphoribosyl)-5-	20	0
WP_003436747.1	dihydroorotase	20	0
WP_003436788.1	carbon-nitrogen hydrolase family protein	20	0
WP_003436791.1	YhdH/YhfP family quinone oxidoreductase	20	0
WP_003436795.1	phenylalanine--tRNA ligase subunit alpha	20	0
WP_003436909.1	bifunctional enoyl-CoA hydratase/phosphate acetyltransferase	20	0
WP_003437017.1	ABC transporter ATP-binding protein	20	0
WP_003437039.1	glucosamine-6-phosphate deaminase	20	0
WP_003437044.1	GntR family transcriptional regulator	20	0
WP_003437079.1	DUF1015 domain-containing protein	20	0
WP_003437082.1	D-3-phosphoglycerate dehydrogenase	20	0
WP_003437122.1	aldo/keto reductase	20	0
WP_003437136.1	DUF1846 domain-containing protein	20	0
WP_003437525.1	NUDIX hydrolase	20	0
WP_003437535.1	NAD(+) synthase	20	0
WP_003437727.1	cobalt-factor II C(20)-methyltransferase	20	0
WP_003437819.1	hypothetical protein	20	0
WP_003437840.1	uracil phosphoribosyltransferase	20	0
WP_003437954.1	peptidase T	20	0
WP_003437956.1	cell wall-binding protein Cwp18	20	0
WP_003437963.1	YbaK/EbsC family protein	20	0
WP_003437972.1	nucleoid-associated protein	20	0
WP_003438015.1	membrane protein	20
WP_003438099.1	ketoacyl-ACP synthase III	20
WP_003438103.1	beta-ketoacyl-ACP synthase II	20	0
WP_003438160.1	purine-nucleoside phosphorylase	20
WP_003438242.1	alpha-hydroxy-acid oxidizing protein	20	0
WP_003438303.1	ribosome maturation factor RimP	20
WP_003438306.1	translation initiation factor IF-2	20	0
WP_003438316.1	polyribonucleotide nucleotidyltransferase	20	0
WP_003438324.1	aspartate kinase	20	0
WP_003438357.1	pyridoxal phosphate-dependent aminotransferase	20	0
WP_003438469.1	GntR family transcriptional regulator	20	0
WP_003438799.1	4-hydroxy-tetrahydrodipicolinate synthase	20
WP_003438808.1	4-hydroxy-tetrahydrodipicolinate reductase	20
WP_003439110.1	ornithine cyclodeaminase family protein	20
WP_003439413.1	shikimate kinase	20	0
WP_003439438.1	O-acetylhomoserine aminocarboxypropyltransferase/cysteine synthase	20	0
WP_003439494.1	TerD family protein	20	0
WP_003439524.1	argininosuccinate synthase	20	0
WP_004453621.1	phosphoribosylaminoimidazolecarboxamide formyltransferase	20	0
WP_004454137.1	MBL fold metallo-hydrolase	20	0
WP_004454140.1	aspartate--tRNA ligase	20	0
WP_004454389.1	2-hydroxyglutaryl-CoA dehydratase	20	0
WP_004454390.1	2-hydroxyacyl-CoA dehydratase	20	0
WP_004454432.1	hydantoinase/oxoprolinase family protein	20	0
WP_004454507.1	aminomethyl-transferring glycine dehydrogenase subunit GcvPA	20	0
WP_004454510.1	lipoate--protein ligase	20	0
WP_004454512.1	TerD family protein	20	0
WP_004454531.1	TerD family protein	20	0
WP_004454635.1	mannitol-1-phosphate 5-dehydrogenase	20	0
WP_004454662.1	ABC transporter substrate-binding protein	20	0
WP_004454737.1	50S ribosomal protein L11 methyltransferase	20	0
WP_004454782.1	mannose-6-phosphate isomerase, class I	20	0
WP_004454789.1	L-seryl-tRNA(Sec) selenium transferase	20	0
WP_004454794.1	D-alanyl-D-alanine carboxypeptidase	20	0
WP_004454864.1	sugar ABC transporter substrate-binding protein	20	0
WP_004454872.1	DAK2 domain-containing protein	20	0
WP_004454901.1	bifunctional phosphopantothenoylcysteine decarboxylase/phosphop	20	0
WP_004454934.1	tryptophan--tRNA ligase	20	0
WP_004454939.1	isoleucine--tRNA ligase	20	0
WP_004454985.1	ABC transporter substrate-binding protein	20	0
WP_009887855.1	23S rRNA (guanosine(2251)-2-O)-methyltransferase RlmB	20	0
WP_009887891.1	MULTISPECIES: 50S ribosomal protein L22	20
WP_009888020.1	4Fe-4S dicluster domain-containing protein	20	0
WP_009888532.1	AAA family ATPase	20	0
WP_009888533.1	formate--tetrahydrofolate ligase	20	0
WP_009888650.1	fumarylacetoacetate hydrolase family protein	20	0
WP_009888722.1	polyamine aminopropyltransferase	20	0
WP_009888724.1	agmatinase	20	0
WP_009888725.1	4Fe-4S dicluster domain-containing protein	20	0
WP_009888750.1	alanine--glyoxylate aminotransferase family protein	20	0
WP_009888867.1	electron transfer flavoprotein subunit beta/FixA family pro	20	0
WP_009888868.1	acetyl-CoA C-acetyltransferase	20	0
WP_009888871.1	LacI family transcriptional regulator CcpA	20	0
WP_009888951.1	polyprenyl synthetase family protein	20	0
WP_009889023.1	elongation factor P	20	0
WP_009889064.1	alanine--tRNA ligase	20	0
WP_009889129.1	CBS domain-containing protein	20	0
WP_009889364.1	tyrosine--tRNA ligase	20	0
WP_009890358.1	alpha/beta hydrolase	20	0
WP_009890455.1	peptidylprolyl isomerase	20	0
WP_009890612.1	pyruvate, phosphate dikinase	20	0
WP_009890640.1	DUF4342 domain-containing protein	20	0
WP_009890686.1	30S ribosomal protein S20	20
WP_009890867.1	cell division protein FtsZ	20	0
WP_009891056.1	preprotein translocase subunit SecA	20	0
WP_009891694.1	TSUP family transporter	20	0
WP_009891764.1	SEC-C domain-containing protein	20	0
WP_009891785.1	phosphoglycerate dehydrogenase	20
WP_009891957.1	cobalt-precorrin-4 methyltransferase	20	0
WP_009892066.1	peptidylprolyl isomerase	20	0
WP_009892124.1	ATP-dependent zinc metalloprotease FtsH	20
WP_009892132.1	GntR family transcriptional regulator	20	0
WP_009892314.1	sulfurtransferase-like selenium metabolism protein YedF	20	0
WP_009892576.1	NAD(P)/FAD-dependent oxidoreductase	20	0
WP_009893310.1	3-dehydroquinate synthase	20	0
WP_009893396.1	M20 family metallo-hydrolase	20	0
WP_009893997.1	NUDIX hydrolase	20	0
WP_009895216.1	preprotein translocase subunit SecA	20	0
WP_009895394.1	M18 family aminopeptidase	20	0
WP_009895580.1	aldo/keto reductase	20	0
WP_009895824.1	GTPase HflX	20	0
WP_009895854.1	alpha-hydroxy-acid oxidizing protein	20
WP_009895856.1	MBL fold metallo-hydrolase	20
WP_009895920.1	GntR family transcriptional regulator	20	0
WP_009896073.1	C40 family peptidase	20	0
WP_009896496.1	sulfide/dihydroorotate dehydrogenase-like FAD/NAD-binding protein	20	0
WP_009896855.1	DUF917 domain-containing protein	20	0
WP_009896932.1	response regulator transcription factor	20
WP_009897245.1	molybdopterin-dependent oxidoreductase	20	0
WP_009897262.1	homoserine kinase	20	0
WP_009897329.1	transporter substrate-binding domain-containing protein	20	0
WP_009897431.1	aminopeptidase P family protein	20	0
WP_009897501.1	phosphoglucomutase	20	0
WP_009897537.1	ketoacyl-ACP synthase III family protein	20	0
WP_009897688.1	argininosuccinate lyase	20	0
WP_009897699.1	6-phospho-alpha-glucosidase	20	0
WP_009897787.1	diaminopimelate epimerase	20	0
WP_009897789.1	fibronectin/fibrinogen-binding protein	20	0
WP_009897854.1	ABC transporter ATP-binding protein	20	0
WP_009897881.1	amidohydrolase	20	0
WP_009897893.1	hypothetical protein	20	0
WP_009897922.1	phosphoenolpyruvate--protein phosphotransferase	20	0
WP_009897928.1	cell wall-binding glycosyl-hydrolase Cwp19	20	0
WP_009897942.1	N-acetylmuramoyl-L-alanine amidase	20	0
WP_009897948.1	cell wall-binding cysteine protease Cwp84	20	0
WP_009897984.1	alanine racemase	20	0
WP_009898007.1	serine--tRNA ligase	20	0
WP_009898042.1	TldD/PmbA family protein	20	0
WP_009898446.1	pyrroline-5-carboxylate reductase	20	0
WP_009898727.1	bifunctional UDP-N-acetylglucosamine diphosphorylase/glucosamin	20
WP_009898730.1	M20/M25/M40 family metallo-hydrolase	20	0
WP_009901543.1	elongation factor G	20	0
WP_009901578.1	pyridoxal phosphate-dependent aminotransferase	20	0
WP_009901733.1	phosphoribosylformylglycinamidine cyclo-ligase	20	0
WP_009901734.1	bifunctional phosphoribosylaminoimidazolecarboxamide formyltran	20	0
WP_009901735.1	phosphoribosylformylglycinamidine synthase	20	0
WP_009901788.1	DUF4132 domain-containing protein	20
WP_009901804.1	TIGR04100 family radical SAM protein	20	0
WP_009901961.1	carbon-nitrogen hydrolase family protein	20	0
WP_009901962.1	hypothetical protein	20	0
WP_009902004.1	hydrolase	20	0
WP_009902055.1	ABC transporter ATP-binding protein	20	0
WP_009902102.1	hypothetical protein	20	0
WP_009902118.1	anaerobic carbon-monoxide dehydrogenase catalytic subunit	20	0
WP_009902122.1	bifunctional 5,10-methylene-tetrahydrofolate dehydrogenase/5,10	20	0
WP_009902124.1	acetyl-CoA decarbonylase/synthase complex subunit gamma	20	0
WP_009902156.1	ABC-F family ATP-binding cassette domain-containing prot	20	0
WP_009902188.1	isocitrate/isopropylmalate dehydrogenase family protein	20	0
WP_009902215.1	NADP-dependent malic enzyme	20	0
WP_009902217.1	N-acetylglucosamine-6-phosphate deacetylase	20	0
WP_009902241.1	N-acetylmuramoyl-L-alanine amidase	20
WP_009902261.1	aminopeptidase	20	0
WP_009902264.1	amidohydrolase	20	0
WP_009902286.1	GTPase ObgE	20	0
WP_009902293.1	ACP S-malonyltransferase	20	0
WP_009902455.1	LamB/YcsF family protein	20	0
WP_009902469.1	cysteine hydrolase	20	0
WP_009902484.1	D-alanine--D-alanine ligase	20
WP_009902534.1	DUF1002 domain-containing protein	20	0
WP_009902544.1	3-methyl-2-oxobutanoate hydroxymethyltransferase	20	0
WP_009902555.1	sulfurtransferase	20	0
WP_009902629.1	phospho-sugar mutase	20	0
WP_009902687.1	lipoprotein	20
WP_009902689.1	aminomethyl-transferring glycine dehydrogenase subunit GcvPB	20	0
WP_009902703.1	dNTP triphosphohydrolase	20	0
WP_009902717.1	radical SAM protein	20	0
WP_009902759.1	hypothetical protein	20
WP_009902770.1	L-threonine 3-dehydrogenase	20	0
WP_009902796.1	3-phosphoshikimate 1-carboxyvinyltransferase	20	0
WP_009902798.1	chorismate synthase	20	0
WP_009902801.1	prephenate dehydratase	20	0
WP_009902802.1	shikimate dehydrogenase	20	0
WP_009902826.1	N-acetylmuramoyl-L-alanine amidase	20	0
WP_009902971.1	glutamine--tRNA ligase/YqeY domain fusion protein	20	0
WP_009903017.1	threonine synthase	20	0
WP_009903155.1	glycine/betaine reductase C	20	0
WP_009903205.1	sn-glycerol-3-phosphate ABC transporter ATP-binding protein UgpC	20
WP_009903219.1	histidinol-phosphate aminotransferase family protein	20	0
WP_009903223.1	leucine--tRNA ligase	20	0
WP_009903233.1	alanine--glyoxylate aminotransferase family protein	20	0
WP_009903252.1	DUF4091 domain-containing protein	20	0
WP_009903260.1	HAD family hydrolase	20	0
WP_009903270.1	low-specificity L-threonine aldolase	20
WP_009903316.1	cell wall-binding protein Cwp14	20	0
WP_009903399.1	C-GCAxxG-C-C family protein	20	0
WP_009903462.1	glycoside hydrolase family 1 protein	20	0
WP_009903482.1	family 1 glycosylhydrolase	20	0
WP_009903701.1	glycyl radical protein	20	0
WP_009903738.1	pyruvate kinase	20	0
WP_009903754.1	porphobilinogen synthase	20	0
WP_009903781.1	alanine racemase	20	0
WP_009903826.1	carbamoyl-phosphate synthase large subunit	20	0
WP_009903829.1	carbamoyl-phosphate synthase large subunit	20	0
WP_009903830.1	homocysteine S-methyltransferase family protein	20	0
WP_009903853.1	GerMN domain-containing protein	20
WP_009904144.1	rod shape-determining protein	20	0
WP_011861169.1	ribonuclease J	20	0
WP_011861534.1	glycine reductase complex selenoprotein B	20	0
WP_011861535.1	glycine/betaine reductase A	20	0
WP_011861888.1	D-proline reductase (dithiol) protein PrdB	20	0
WP_012816064.1	protein-ADP-ribose hydrolase	20	0
WP_014466379.1	UTP--glucose-1-phosphate uridylyltransferase GalU	20	0
WP_015984864.1	hypothetical protein	20	0
WP_021360381.1	GNAT family N-acetyltransferase	20	0
WP_021403625.1	SPOR domain-containing protein	20	0
WP_025992040.1	2,3-bisphosphoglycerate-independent phosphoglycerate mutase	20	0
WP_032506644.1	nitronate monooxygenase	20	0
WP_077726223.1	molybdopterin-dependent oxidoreductase	20	0
WP_169460754.1	ribosome biogenesis GTPase Der	20	0
WP_172618423.1	amidohydrolase	20	0
WP_003416574.1	ROK family protein	20
WP_003416961.1	RNase adapter RapZ	20
WP_003418641.1	glucose-1-phosphate adenylyltransferase subunit GlgD	20
WP_003419074.1	TIGR03960 family B12-binding radical SAM protein	20
WP_003419561.1	MarR family transcriptional regulator	20
WP_003420481.1	DNA polymerase III subunit beta	20
WP_003421130.1	type I methionyl aminopeptidase	20
WP_003421190.1	transcription termination/antitermination factor NusG	20
WP_003421453.1	septation regulator SpoVG	20
WP_003424273.1	MurR/RpiR family transcriptional regulator	20
WP_003424287.1	aspartate kinase	20
WP_003424529.1	isoprenyl transferase	20
WP_003425719.1	hydroxymethylbilane synthase	20
WP_003425980.1	type III pantothenate kinase	20
WP_003426448.1	D-tyrosyl-tRNA(Tyr) deacylase	20
WP_003426450.1	adenine phosphoribosyltransferase	20
WP_003427657.1	nicotinate phosphoribosyltransferase	20
WP_003428218.1	recombinase RecA	20
WP_003428379.1	NUDIX hydrolase	20
WP_003428643.1	prephenate dehydrogenase	20
WP_003428667.1	prolyl-tRNA synthetase associated domain-containing protein	20
WP_003428669.1	YtxH domain-containing protein	20
WP_003428792.1	ABC transporter substrate-binding protein	20
WP_003429416.1	GTP cyclohydrolase I FolE	20
WP_003429564.1	transcriptional regulator	20
WP_003430325.1	4-hydroxy-3-methylbut-2-enyl diphosphate reductase	20
WP_003430597.1	UMP kinase	20
WP_003430621.1	translational GTPase TypA	20
WP_003430700.1	ribose 5-phosphate isomerase B	20
WP_003431170.1	guanylate kinase	20
WP_003433741.1	AIM24 family protein	20
WP_003434069.1	cell division protein	20
WP_003434235.1	protein jag	20
WP_003434962.1	tRNA dihydrouridine synthase DusB	20
WP_003435637.1	trypsin-like peptidase domain-containing protein	20
WP_003435804.1	M15 family metallopeptidase	20
WP_003436669.1	bifunctional phosphoribosyl-AMP cyclohydrolase/phosphoribosyl-A	20
WP_003437062.1	fumarate hydratase	20
WP_003437464.1	DEAD/DEAH box helicase	20
WP_003437965.1	enoyl-CoA hydratase/isomerase family protein	20
WP_003438480.1	Gfo/Idh/MocA family oxidoreductase	20
WP_003438644.1	Nif3-like dinuclear metal center hexameric protein	20
WP_003438661.1	4Fe-4S dicluster domain-containing protein	20
WP_004454235.1	aconitate hydratase	20
WP_004454633.1	xanthine phosphoribosyltransferase	20
WP_004454642.1	toxic anion resistance protein	20
WP_004454650.1	aminopeptidase P family protein	20
WP_004454677.1	butyrate kinase	20
WP_004454894.1	ribosome small subunit-dependent GTPase A	20
WP_004454967.1	UDP-N-acetylmuramoyl-L-alanine--D-glutamate ligase	20
WP_004454972.1	insulinase family protein	20
WP_004455011.1	DUF3798 domain-containing protein	20
WP_009887799.1	PIN/TRAM domain-containing protein	20
WP_009888186.1	DUF3553 domain-containing protein	20
WP_009888208.1	hydrolase	20
WP_009889110.1	tyrosine-type recombinase/integrase	20
WP_009889182.1	M55 family metallopeptidase	20
WP_009891383.1	PTS sugar transporter subunit IIB	20
WP_009891688.1	hypoxanthine phosphoribosyltransferase	20
WP_009893200.1	calcium-translocating P-type ATPase, PMCA-type	20
WP_009893498.1	GNAT family N-acetyltransferase	20
WP_009893687.1	YggS family pyridoxal phosphate-dependent enzyme	20
WP_009894114.1	tetratricopeptide repeat protein	20
WP_009895291.1	metallophosphoesterase	20
WP_009895917.1	glycogen/starch/alpha-glucan phosphorylase	20
WP_009897702.1	PTS glucose transporter subunit IIA	20
WP_009897829.1	UDP-N-acetylmuramoyl-tripeptide--D-alanyl-D-alanine ligase	20
WP_009897839.1	UDP-N-acetylmuramoyl-L-alanyl-D-glutamate--2,6-diaminopimelate ligase	20
WP_009898858.1	tRNA uridine-5-carboxymethylaminomethyl(34) synthesis e	20
WP_009898860.1	tRNA uridine-5-carboxymethylaminomethyl(34) synthesis G	20
WP_009901591.1	rod shape-determining protein	20
WP_009901770.1	iron-containing alcohol dehydrogenase	20
WP_009902136.1	cysteine desulfurase	20
WP_009902154.1	transglycosylase domain-containing protein	20
WP_009902274.1	DNA polymerase I	20
WP_009902401.1	leucyl aminopeptidase	20
WP_009902453.1	glycerol kinase GlpK	20
WP_009902722.1	alanine:cation symporter family protein	20
WP_009902970.1	hypothetical protein	20
WP_009903157.1	GrdX family protein	20
WP_009903196.1	ribosome-associated translation inhibitor RaiA	20
WP_009903261.1	PASTA domain-containing Ser/Thr kinase PrkC	20
WP_009903369.1	type I-B CRISPR-associated protein Cas7/Cst2/DevR	20
WP_009903390.1	ABC transporter substrate-binding protein	20
WP_009903415.1	PTS transporter subunit EIIC	20
WP_009903436.1	DUF523 domain-containing protein	20
WP_009903671.1	proline reductase cluster protein PrdD	20
WP_009903709.1	endopeptidase La	20
WP_009903761.1	cobalt-precorrin-8 methylmutase	20
WP_009903770.1	aldose 1-epimerase family protein	20
WP_009903810.1	type II secretion system protein	20
WP_011860916.1	translation initiation factor IF-3	20
WP_021364007.1	cobyric acid synthase	20
WP_021364825.1	4-hydroxy-tetrahydrodipicolinate reductase	20
WP_032507408.1	diphthine--ammonia ligase	20
WP_162835941.1	chromosomal replication initiator protein DnaA	20
WP_025992035.1	PTS glucose transporter subunit IIA	19.775	0.318198
WP_003420885.1	orotate phosphoribosyltransferase	19.17	1.1738
WP_003430785.1	DsrE family protein	19.12
WP_004454961.1	sugar ABC transporter substrate-binding protein	19.08	1.30108
WP_003429565.1	phosphoglycerate kinase	19.005	1.40714
WP_009903676.1	valine--tRNA ligase	18.56	2.03647
WP_009889331.1	helix-turn-helix transcriptional regulator	18.28	1.00409
WP_003418897.1	3-hydroxybutyryl-CoA dehydrogenase	18.25	2.47487
WP_003430702.1	transketolase family protein	18.175	2.58094
WP_004453528.1	S1 RNA-binding domain-containing protein	18.145	2.62337
WP_009888509.1	phenylalanine--tRNA ligase subunit beta	17.73	3.21026
WP_003432442.1	3-methyl-2-oxobutanoate dehydrogenase subunit VorB	17.635	3.34462
WP_003419428.1	transcriptional repressor	17.525	3.50018
WP_003434417.1	ribosome-associated translation inhibitor RaiA	17.225	3.92444
WP_009903827.1	glutamine-hydrolyzing carbamoyl-phosphate synthase small subunit	17.075	4.13657
WP_004454365.1	hypothetical protein	16.905	4.37699
WP_003439443.1	thioredoxin-dependent thiol peroxidase	16.875	4.41942
WP_003428573.1	electron transfer flavoprotein subunit alpha/FixB family pr	16.78	4.55377
WP_003427733.1	DNA-directed RNA polymerase subunit alpha	16.665	4.7164
WP_003437171.1	glycogen synthase GlgA	16.48	4.97803
WP_003423106.1	IMP dehydrogenase	16.15	5.44472
WP_003422058.1	L-serine ammonia-lyase	16.06	5.572
WP_009888019.1	anaerobic carbon-monoxide dehydrogenase catalytic subunit	15.85	5.86899
WP_003421187.1	50S ribosomal protein L10	15.835	0.799031
WP_003420711.1	2-oxoacid:acceptor oxidoreductase family protein	15.315	2.31224
WP_003421188.1	50S ribosomal protein L1	15.125	1.50614
WP_003417352.1	class II fructose-1,6-bisphosphate aldolase	15.095	2.15668
WP_003421138.1	30S ribosomal protein S5	14.8	1.54149
WP_003428430.1	GNAT family N-acetyltransferase	14.8
WP_003424535.1	elongation factor Ts	14.775	7.38927
WP_003421125.1	30S ribosomal protein S13	14.72	1.10309
WP_009903195.1	glycine--tRNA ligase subunit beta	14.555	2.87792
WP_003439113.1	lipoprotein	14.48
WP_003420524.1	MULTISPECIES: single-stranded DNA-binding protein	14.46
WP_003421186.1	50S ribosomal protein L7/L12	14.245	0.473762
WP_009895184.1	cysteine--tRNA ligase	14.23	8.16001
WP_009901787.1	putative manganese-dependent inorganic diphosphatase	14.155	8.26608
WP_003418655.1	adenosylmethionine decarboxylase	14.13
WP_003438268.1	GTP-sensing pleiotropic transcriptional regulator CodY	14.065	8.39336
WP_003421137.1	50S ribosomal protein L30	14.05
WP_003429132.1	6-phosphofructokinase	13.96	8.54185
WP_009902875.1	methionine gamma-lyase family protein	13.77
WP_003437841.1	ribose 5-phosphate isomerase B	13.68
WP_003421135.1	50S ribosomal protein L15	13.665	0.148492
WP_003436885.1	arginine--tRNA ligase	13.425	9.29845
WP_003431407.1	D-2-hydroxyacid dehydrogenase	13.39	0.933381
WP_009897956.1	cell wall-binding protein Cwp2	13.385	9.35502
WP_003421148.1	30S ribosomal protein S8	13.365	1.16673
WP_003419350.1	50S ribosomal protein L19	13.21
WP_004454042.1	serine dehydratase subunit alpha family protein	13.15	0.438406
WP_025992020.1	Nif3-like dinuclear metal center hexameric protein	13.075	9.79343
WP_003421962.1	type I glyceraldehyde-3-phosphate dehydrogenase	13.055	0.403051
WP_009901585.1	phosphoglucosamine mutase	13.055	9.82171
WP_003421197.1	FAD-dependent thymidylate synthase	12.86
WP_003424064.1	acetyl-CoA carboxylase carboxyltransferase subunit beta	12.79
WP_003439900.1	proline iminopeptidase-family hydrolase	12.715	10.3025
WP_003420866.1	NAD-specific glutamate dehydrogenase	12.68	0.0989949
WP_009903471.1	M20 family metallopeptidase	12.145	0.33234
WP_003436172.1	SDR family oxidoreductase	12.095	11.1794
WP_009898301.1	phosphopyruvate hydratase	12.03	0.678823
WP_009887887.1	50S ribosomal protein L4	11.98	0.749533
WP_003437537.1	YebC/PmpR family DNA-binding transcriptional regulator	11.965	3.23148
WP_009902746.1	cell wall-binding cysteine protease Cwp13	11.88
WP_003419338.1	30S ribosomal protein S16	11.81
WP_003437173.1	SPFH/Band 7/PHB domain protein	11.405	12.1552
WP_009901573.1	adenylate kinase	11.275	1.70413
WP_009896478.1	polysaccharide deacetylase	11.11
WP_009903275.1	aminopeptidase P family protein	11.095	4.278
WP_003419624.1	cold-shock protein	10.865	0.954594
WP_009887863.1	elongation factor Tu	10.62	0.113137
WP_003436882.1	aminoacyl-histidine dipeptidase	10.37	4.32749
WP_003437561.1	hypothetical protein	10.3	1.0748
WP_003421160.1	50S ribosomal protein L16	10.175	3.41533
WP_003420706.1	4Fe-4S binding protein	10.14
WP_003417102.1	ATP-dependent Clp endopeptidase proteolytic subunit ClpP	10
WP_003421175.1	30S ribosomal protein S10	9.775	4.23557
WP_003435673.1	50S ribosomal protein L5	9.475	0.289914
WP_003421168.1	50S ribosomal protein L2	9.395	1.6617
WP_009902000.1	threonine--tRNA ligase	9.355	5.50836
WP_009897960.1	S-layer protein SlpA	9.255	0.00707107
WP_003419082.1	50S ribosomal protein L21	9.08	0.0565685
WP_003433890.1	ferritin	8.96	0.183848
WP_003420527.1	30S ribosomal protein S18	8.88
WP_009889131.1	peptidylprolyl isomerase	8.76	0.155563
WP_003418888.1	acyl-CoA dehydrogenase	8.635	0.233345
WP_003430934.1	molecular chaperone DnaK	8.625	7.10642
WP_003432446.1	glutamine--fructose-6-phosphate transaminase (isomerizing)	8.42	5.74171
WP_003421163.1	30S ribosomal protein S3	8.095	0.544472
WP_003421155.1	50S ribosomal protein L14	7.935	6.01748
WP_003424537.1	30S ribosomal protein S2	7.835	0.190919
WP_003438795.1	N-acetyldiaminopimelate deacetylase	7.72	5.76999
WP_003436178.1	elongation factor G	7.615	0.13435
WP_003416451.1	RidA family protein	7.36	0.113137
WP_009889371.1	NADH peroxidase	7.36	0.565685
WP_003417090.1	trigger factor	7.235	0.33234
WP_003419930.1	NADH peroxidase	7.2	0.650538
WP_003421158.1	MULTISPECIES: 50S ribosomal protein L29	7.16
WP_003438096.1	acetate kinase	7.11	0.777817
WP_003421173.1	50S ribosomal protein L3	7.1	0.226274
WP_009898069.1	bifunctional acetaldehyde-CoA/alcohol dehydrogenase	6.55	0
WP_003421141.1	50S ribosomal protein L18	6.405	1.52028
WP_003429730.1	50S ribosomal protein L20	6.23
WP_003438030.1	nitroreductase family protein	6.225	0.106066
WP_003434815.1	bifunctional acetaldehyde-CoA/alcohol dehydrogenase	5.85	0.0565685
WP_009903412.1	SIS domain-containing protein	5.8	0.155563
WP_003421121.1	30S ribosomal protein S4	5.41	0.0141421
WP_009902397.1	Fe-S cluster assembly scaffold protein NifU	5.1	2.94156
WP_003421156.1	30S ribosomal protein S17	5.09
WP_003418513.1	rubrerythrin family protein	4.885	0.148492
WP_003421105.1	30S ribosomal protein S9	4.84
WP_009889571.1	nucleoside hydrolase	4.83	0.240416
WP_003428474.1	FprA family A-type flavoprotein	4.815	0.162635
WP_009903690.1	oligoendopeptidase F	4.81
WP_003421107.1	50S ribosomal protein L13	4.785	0.205061
WP_003434936.1	SEC-C domain-containing protein	4.73	0.0282843
WP_003421117.1	50S ribosomal protein L17	4.545	0.0777817
WP_003425850.1	F0F1 ATP synthase subunit beta	4.455	0.0494975
WP_003430159.1	NifB/NifX family molybdenum-iron cluster-binding protein	4.345	0.233345
WP_003421367.1	F0F1 ATP synthase subunit alpha	4.265	0.0494975
WP_009901692.1	chaperonin GroEL	3.85	0.622254
WP_003427760.1	electron transfer flavoprotein subunit beta/FixA family pro	3.77	0.0424264
WP_009897862.1	pyruvate:ferredoxin (flavodoxin) oxidoreductase	3.645	0.0212132
WP_003430157.1	NAD(P)/FAD-dependent oxidoreductase	3.63	0.311127
WP_003425597.1	pyruvate carboxylase	3.63	0.0141421
WP_003427762.1	acyl-CoA dehydrogenase family protein	3.32	0.0424264
WP_009890721.1	threonine ammonia-lyase	3.315	0.0212132
WP_003427022.1	redox-regulated ATPase YchF	3.25
WP_003417347.1	electron transfer flavoprotein subunit alpha/FixB family pr	3.245	0.00707107
WP_009896192.1	cysteine desulfurase NifS	3.115	0.0636396
WP_003421189.1	50S ribosomal protein L11	2.94
WP_009888223.1	2-hydroxyisocaproyl-CoA dehydratase activator HadI	2.905	0.190919
WP_009901809.1	(R)-2-hydroxyisocaproyl-CoA dehydratase subunit HadB	2.71	0.0141421
WP_003424083.1	hypothetical protein	2.7	0.0565685
WP_009892190.1	VOC family protein	2.49
WP_003427766.1	isocaprenoyl-CoA:2-hydroxyisocaproate CoA-transferase HadA	2.455	0.00707107
WP_009897314.1	peptide-methionine (S)-S-oxide reductase MsrA	2.405	0.247487
WP_003435668.1	50S ribosomal protein L6	2.39
WP_003427763.1	(R)-2-hydroxyisocaproyl-CoA dehydratase subunit beta	2.28	0.0141421
WP_003436863.1	NADP-dependent glyceraldehyde-3-phosphate dehydrogenase	2.225	0.0494975
WP_003427723.1	50S ribosomal protein L24	2.185	0.289914
WP_003420374.1	thioredoxin	1.95	0.226274
WP_003421180.1	30S ribosomal protein S7	1.915	0.0353553
WP_009897890.1	cell wall-binding protein Cwp22	1.55
WP_003428740.1	acetyl-CoA carboxylase biotin carboxyl carrier protein	1.405	0.0636396
WP_009895182.1	proline--tRNA ligase	1.39	0
WP_009902521.1	cell wall-binding protein Cwp20	1.11	0.0707107
WP_004454646.1	aldehyde dehydrogenase family protein	1.085	0.247487
WP_009895180.1	proline--tRNA ligase	1	0.0141421
WP_003430299.1	4Fe-4S-binding domain protein	0.85
WP_003439500.1	FAD-dependent oxidoreductase	0.765	0.00707107
WP_009902143.1	formate C-acetyltransferase	0.445	0.00707107
WP_009901581.1	anaerobic ribonucleoside triphosphate reductase	0.41	0.0282843

## Sheet: Probe 2_enrichment replicate 1
replicate 1 : Probe 2–enrichment compared between MM and BHIS
Accession	description	symbol	sequence	mass	median ratio	standard deviation	charge
WP_003435194.1	ATP-dependent chaperone ClpB	ATP-dependent			0.04	0.03	2
			K.NDFLNILSQVR.G	1345.7354	0.09	1/1	2
			K.VYGEGADSQGVSATR.K	1523.7216	0.04	1/1	2
			R.VETQDPEGTYDALAR.Y	1691.8003	0.04	1/1	2
			K.MNISIDSLR.N	1075.5696	0.00	0/0	2
			K.SLNEAYNEAVK.N	1292.6612	0.00	1/0	2
			K.VYGEGADSQGVSATR.K	1523.7216	0.00	1/0	3
			K.VYGEGADSQGVSATRK.I	1679.8479	0.00	0/0	3
			R.GELNCIGATTFDEYR.K	1772.804	0.00	0/0	2
			R.GSQRVETQDPEGTYDALAR.Y	2121.0168	0.00	0/0	2
			R.GSQRVETQDPEGTYDALAR.Y	2121.0168	0.00	0/0	3
			R.NTVNFEIDKLPK.V	1500.8552	0.00	1/0	3
			R.VETQDPEGTYDALAR.Y	1691.8003	0.00	0/0	3
			R.YGTNLVDLAKK.N	1304.7704	0.00	0/0	3
WP_003437451.1	pyruvate formate lyase-activating protein	pyruvate			0.05	0	2
			K.LGQFVATLK.N	1031.6379	0.05	1/1	2
			R.NIPVWIR.H	924.5545	0.05	1/0	2
			R.YILFFQGCPLR.C	1440.7588	0.05	1/1	2
			K.ASEIISK.F	802.48	0.00	1/0	2
			K.DVPDATKEDVQK.A	1427.7508	0.00	0/0	2
			K.EYTVDEIITDALK.Y	1564.8236	0.00	0/0	2
			K.IHSIETFGTVDGPGIR.Y	1725.905	0.00	0/0	3
			K.SIDLTGVGMDK.A	1190.6217	0.00	1/0	2
			R.FELLPYHSMGIHK.W	1626.8592	0.00	0/0	4
			R.HVLVPGITDDIDNLEK.L	1833.9917	0.00	0/0	2
			R.HVLVPGITDDIDNLEK.L	1833.9917	0.00	0/0	3
WP_009888223.1	2-hydroxyisocaproyl-CoA dehydratase activator HadI	2-hydroxyisocaproyl-CoA			0.09	0.06	23
			K.QISELSCHAR.G	1227.603	0.21	1/1	3
			K.VVVTGYGR.M	877.5022	0.07	1/1	2
			R.FLDVMAK.I	878.4936	0.09	1/1	2
			R.GVNFIIPETR.T	1172.6554	0.09	1/1	2
			R.TIIDIGGQDAK.V	1185.6605	0.1	1/1	2
			-.MYTM(15.995)GLDIGSTASK.G	572.2338	0.00	0/0	2
			-.MYTMGLDIGSTASK.G	1529.747	0.00	0/0	2
			K.NGEDIVASETISSGTGTTGPSR.V	2164.0325	0.00	0/0	2
			K.NGEDIVASETISSGTGTTGPSR.V	2164.0325	0.00	0/0	3
			K.QISELSCHAR.G	1227.603	0.00	0/0	2
			R.LLNFLMNDK.C	1162.642	0.00	1/0	2
			R.MNYSDADKQISELSCHAR.G	2181.0024	0.00	0/0	4
			R.NVVMVGGVAR.N	1028.5801	0.00	0/0	2
WP_009897952.1	cell wall-binding repeat-containing protein	cell			0.09	0.05	2
			K.NSGNINTISGSEEPSISGK.K	1945.9593	0.09	1/1	2
			K.VESCIPALK.D	1071.5998	0.15	1/1	2
			R.VVDEKPSAK.Y	1055.6227	0.06	1/1	2
			K.DGSYIEAVEIDTSNNEVSR.W	2125.9845	0.00	0/0	2
			K.DGSYIEAVEIDTSNNEVSR.W	2125.9845	0.00	0/0	3
			K.DVYILNR.G	919.5127	0.00	1/0	2
			K.GWSMVTISNQSFIER.A	1781.8771	0.00	0/0	2
			K.ISNNSSSVTIK.N	1204.6663	0.00	0/0	2
			K.KPITNDTDKDEDK.K	1629.8461	0.00	0/0	3
			K.NGSPILLAGNK.L	1138.671	0.00	0/0	2
			K.NSGNINTISGSEEPSISGK.K	1945.9593	0.00	0/0	3
			K.NSKDVYILNR.G	1276.7139	0.00	0/0	2
			K.QLNAENISFER.I	1347.6783	0.00	0/0	2
			K.QSITIDMPNGDIK.N	1486.7701	0.00	0/0	2
			K.SDANDIIR.F	930.4771	0.00	0/0	2
			K.VESCIPALKDYVR.I	1604.8596	0.00	0/0	3
			R.AKDGSYIEAVEIDTSNNEVSR.W	2353.1479	0.00	0/0	2
			R.AKDGSYIEAVEIDTSNNEVSR.W	2353.1479	0.00	0/0	3
			R.ITISTKPESSK.Y	1273.7493	0.00	1/0	2
WP_009895854.1	alpha-hydroxy-acid oxidizing protein	alpha-hydroxy-acid			0.1	0.00	2
			K.EGDLNYLSTYLR.R	1470.7355	0.1	1/1	2
			K.HMDIIHEMAVTGK.S	1536.7793	0.00	1/0	3
			K.NDKTWDELSEDWECPVCTK.G	2496.1018	0.00	0/0	3
WP_025992033.1	nucleotide exchange factor GrpE	nucleotide			0.12	0.13	2
			K.ETIGVFANEK.I	1162.6234	0.4	1/1	2
			K.FGVEEIEAESK.E	1292.65	0.26	1/1	2
			K.IITELIPVIDSMER.A	1655.9168	0.08	1/1	2
			K.QLIDTLVK.F	984.6219	0.11	1/1	2
			R.LQAEYANYR.R	1154.572	0.12	1/1	2
			K.IITELIPVIDSM(15.995)ER.A	1370.7731	0.00	0/0	2
			K.IITELIPVIDSM(15.995)ER.A	1370.7731	0.00	0/0	3
			K.IITELIPVIDSMER.A	1655.9168	0.00	1/0	3
			K.KLQDELDELNDK.Y	1542.8141	0.00	0/0	2
			K.KLQDELDELNDKYQR.L	1991.0405	0.00	0/0	2
			K.KLQDELDELNDKYQR.L	1991.0405	0.00	0/0	3
			K.KLQDELDELNDKYQR.L	1991.0405	0.00	0/0	4
			K.LQDELDELNDKYQR.L	1833.9109	0.00	0/0	2
			K.TDEKEVDDENVTDINSK.L	2034.9674	0.00	0/0	2
			R.ALDACEDKEDTMYK.G	1771.8008	0.00	0/0	2
			R.ALDACEDKEDTMYK.G	1771.8008	0.00	1/0	3
			R.TQQEKETIGVFANEK.I	1804.9571	0.00	0/0	2
WP_003425850.1	F0F1 ATP synthase subunit beta	F0F1			0.14	0.01	2
			K.VVDLLAPYLK.G	1185.7373	0.13	1/1	2
			R.QISSLGIYPAVDPLESTSR.I	2061.0823	0.15	1/1	2
			K.QHGGISVFSGVGER.T	1456.7423	0.00	0/0	2
			K.QHGGISVFSGVGER.T	1456.7423	0.00	1/0	3
			K.TALVFGQM(15.995)NEPPGAR.M	893.4681	0.00	0/0	2
			K.TALVFGQMNEPPGAR.M	1614.8188	0.00	1/0	2
			K.TVLIQELINNIAK.Q	1523.9287	0.00	0/0	2
			R.CIAMSATDGLVR.G	1320.653	0.00	0/0	2
			R.EGNDLYGEM(15.995)SESGVINK.T	1054.4277	0.00	0/0	2
			R.EGNDLYGEMSESGVINK.T	1896.8775	0.00	0/0	2
			R.GM(15.995)EVVDTGGPISVPVGDETLGR.I	234.1038	0.00	0/0	2
			R.GMEVVDTGGPISVPVGDETLGR.I	2213.1079	0.00	1/0	2
			R.GMEVVDTGGPISVPVGDETLGR.I	2213.1079	0.00	1/0	3
			R.ILDPSIVGKEHYEVAR.G	1882.0394	0.00	0/0	4
			R.MPSAVGYQPTLATEM(15.995)GALQER.I	1622.7684	0.00	0/0	3
			R.MPSAVGYQPTLATEMGALQER.I	2278.1167	0.00	0/0	2
			R.MPSAVGYQPTLATEMGALQER.I	2278.1167	0.00	0/0	3
			R.TREGNDLYGEMSESGVINK.T	2155.0297	0.00	0/0	3
WP_009902717.1	radical SAM protein	radical			0.14	0.00	2
			K.IGVETFDNYFR.N	1387.6772	0.14	1/1	2
			R.EYFEIPVVFK.I	1325.7271	0.00	1/0	2
WP_009901675.1	response regulator transcription factor	response			0.15	0.00	3
			R.NKIEDNPENPK.I	1380.7249	0.15	1/1	3
			R.NKIEDNPENPK.I	1380.7249	0.00	0/0	2
			R.RYNFTSENVTELK.S	1655.8519	0.00	0/0	3
			R.TVEEALQIYK.E	1248.6966	0.00	0/0	2
			R.YNFTSENVTELK.S	1499.7508	0.00	0/0	2
WP_003427766.1	isocaprenoyl-CoA:2-hydroxyisocaproate CoA-transferase HadA	isocaprenoyl-CoA:2-hydroxyisocaproate			0.16	0.12	2
			K.IEPIEGDGIR.V	1125.603	0.44	1/1	2
			K.IVGEAMLEK.T	1044.5889	0.17	1/1	2
			K.LLSEADIFVTNVR.V	1503.8297	0.09	1/1	2
			K.TYDSGNTGVLVNTPVMFR.N	1998.9914	0.1	1/1	2
			K.VGQHTVEVLK.S	1164.6867	0.16	1/1	2
			R.ENPNSPLMTTYK.C	1449.7174	0.15	1/1	2
			R.GGVSQSVMEK.G	1076.5536	0.17	1/1	2
			K.DKPGFDYTAYFAR.G	1605.7827	0.00	0/0	3
			K.KTYDSGNTGVLVNTPVMFR.N	2155.1177	0.00	1/0	3
			K.MLGDWGAEVIK.I	1273.674	0.00	1/0	2
			K.SKEGVEILHK.L	1222.7285	0.00	1/0	3
			K.SPASDDENPM(15.995)FELENGNK.K	1089.4285	0.00	0/0	2
			K.SPASDDENPMFELENGNK.K	2049.9031	0.00	0/0	2
			K.SPASDDENPMFELENGNKK.G	2206.0293	0.00	0/0	3
			K.TYDSGNTGVLVNTPVM(15.995)FR.N	1694.8185	0.00	0/0	2
			K.TYDSGNTGVLVNTPVMFR.N	1998.9914	0.00	1/0	3
			K.VVELSSFIAAPCCAK.M	1706.8736	0.00	1/0	2
			R.ENPNSPLM(15.995)TTYK.C	928.4324	0.00	0/0	2
			R.GGVSQSVM(15.995)EK.G	791.3847	0.00	0/0	2
			R.NEGIKEYTPAPK.V	1429.7817	0.00	0/0	2
WP_009898085.1	GyrI-like domain-containing protein	GyrI-like			0.17	0.00	2
			R.EIYISDAR.K	993.5131	0.17	1/1	2
			K.KNPVIVEIPEQK.F	1476.8916	0.00	1/0	3
WP_003421173.1	50S ribosomal protein L3	50S			0.2	4.12	234
			K.ADVFEAGAK.I	962.5073	0.28	1/1	2
			K.EFRVDSVEGYTVGQEIK.A	2012.0296	0.1	1/1	3
			K.GFQGPIK.R	801.4749	0.6	1/1	2
			K.GFQGPIKR.H	957.576	0.27	1/1	2
			K.GVVIPVTAVEAGPMVVTQIK.T	2064.2098	0.16	1/1	2
			K.GVVIPVTAVEAGPMVVTQIK.T	2064.2098	0.17	1/1	3
			K.IDVTGISK.G	887.5328	0.22	1/1	2
			K.KGHLAAANVLK.K	1204.7656	20	0/0	2
			K.KGHLAAANVLK.K	1204.7656	1.5	1/1	3
			K.KVGMTQIFTDK.G	1350.7581	0.18	1/1	2
			K.KVGMTQIFTDK.G	1350.7581	0.2	1/1	3
			K.LAGHMGSVK.V	954.5321	0.21	1/1	2
			K.TVDKDGYNAIQIGFEDAK.E	2068.0558	0.4	1/1	3
			K.TVDKDGYNAIQIGFEDAKEK.A	2353.2247	0.07	1/1	4
			K.VDADKNLILVK.G	1310.8173	0.1	1/1	2
			K.VDADKNLILVK.G	1310.8173	0.1	1/1	3
			K.VGMTQIFTDK.G	1194.6318	0.21	1/1	2
			K.VTVQNLEVVK.V	1183.7176	0.2	1/1	2
			P.GSMGACSYPGR.V	1169.4958	0.19	1/1	2
			R.RPGSMGACSYPGR.V	1422.6496	0.18	1/1	2
			R.RPGSMGACSYPGR.V	1422.6496	0.19	1/1	3
			R.VDSVEGYTVGQEIK.A	1578.8141	0.4	1/1	2
			R.VDSVEGYTVGQEIK.A	1578.8141	0.4	1/1	3
			K.DGYNAIQIGFEDAKEK.A	1881.9554	0.00	0/0	3
			K.EFRVDSVEGYTVGQEIK.A	2012.0296	0.00	1/0	2
			K.GVVIPVTAVEAGPM(15.995)VVTQIK.T	1366.753	0.00	0/0	2
			K.GVVIPVTAVEAGPM(15.995)VVTQIK.T	1366.753	0.00	0/0	3
			K.KVGM(15.995)TQIFTDK.G	489.2985	0.00	0/0	2
			K.TVDKDGYNAIQIGFEDAK.E	2068.0558	0.00	0/0	2
			K.TVDKDGYNAIQIGFEDAKEK.A	2353.2247	0.00	0/0	3
			K.VGM(15.995)TQIFTDK.G	333.1722	0.00	0/0	2
			R.RPGSM(15.995)GACSYPGR.V	574.2897	0.00	0/0	3
WP_003427760.1	electron transfer flavoprotein subunit beta/FixA family pro	electron			0.2	0.13	23
			K.LDIPQVTYVQDFK.I	1620.8763	0.51	1/1	2
			K.QVPDTNEVR.I	1084.5513	0.2	1/1	2
			K.VGDYDIIFAGR.Q	1252.6452	0.14	1/1	2
			K.VSTPVLLTAVK.E	1182.7588	0.15	1/1	2
			R.DGVPSILNPDDANALEEALK.I	2137.0984	0.18	1/1	2
			R.QAIDGDTAQVGPQIAEK.L	1795.9316	0.32	1/1	2
			R.QAIDGDTAQVGPQIAEK.L	1795.9316	0.44	1/1	3
			R.QLEDGYELIK.V	1262.6758	0.18	1/1	2
			R.SFTPEPR.G	860.4392	0.33	1/1	2
			K.VWTIDDLDVNKEEVGLK.A	2057.1126	0.00	0/0	3
			R.AFGGADTWATSNTIAAGISK.V	1995.0143	0.00	1/0	2
			R.AFGGADTWATSNTIAAGISK.V	1995.0143	0.00	0/0	3
			R.ECLAM(15.995)GADDAILLSDR.A	650.2768	0.00	0/0	2
			R.ECLAMGADDAILLSDR.A	1776.8386	0.00	1/0	2
			R.GKGEILEGKADEIASK.I	1755.9982	0.00	0/0	3
WP_009888460.1	response regulator transcription factor	response			0.2	0.00	2
			R.VFLASSYEEAVR.V	1397.7191	0.2	1/1	2
			K.LGDSVVVNLNSACVEK.D	1758.9186	0.00	0/0	2
			R.ETSKIPVIFLSAR.G	1515.9025	0.00	0/0	3
			R.VYVPIEEEELPVFK.L	1746.9525	0.00	1/0	2
WP_003435668.1	50S ribosomal protein L6	50S			0.21	0.06	234
			K.EENTIMVERPTDNKK.H	1886.9772	0.18	1/1	3
			K.EENTIMVERPTDNKK.H	1886.9772	0.17	1/1	4
			K.KEENTIMVER.P	1303.6806	0.25	1/1	2
			K.KEENTIMVERPTDNK.K	1886.9772	0.18	1/1	3
			K.KEENTIMVERPTDNKK.H	2044.1068	0.21	1/1	3
			K.KEENTIMVERPTDNKK.H	2044.1068	0.21	1/1	4
			K.QLSAELNIK.K	1070.6336	0.34	1/1	2
			K.QLVGNYAAK.I	1018.5811	0.22	1/1	2
			K.YVDEVIR.R	920.4967	0.21	1/1	2
			R.TLLDNMVVGVNTGFEK.K	1791.9441	0.09	1/1	2
			K.GIDKQLVGNYAAK.I	1459.8399	0.00	0/0	2
			K.GIDKQLVGNYAAK.I	1459.8399	0.00	0/0	3
			K.QLSAELNIKK.E	1226.7598	0.00	0/0	3
			R.IGVKPIIIPAGVEVTIAEGNLVTVK.G	2614.6118	0.00	0/0	3
			R.TLLDNM(15.995)VVGVNTGFEK.K	733.368	0.00	0/0	2
			R.TLLDNM(15.995)VVGVNTGFEK.K	733.368	0.00	0/0	3
			R.TLLDNMVVGVNTGFEK.K	1791.9441	0.00	1/0	3
WP_003427762.1	acyl-CoA dehydrogenase family protein	acyl-CoA			0.22	0.1	23
			K.ELDTLPAEMDK.T	1316.6534	0.49	1/1	2
			K.FQNTQFTIADMETK.V	1728.8393	0.22	1/1	2
			K.FQNTQFTIADMETK.V	1728.8393	0.21	1/1	3
			K.IAMGTLEVGR.I	1073.5903	0.2	1/1	2
			K.MVISSNVLK.-	1045.6206	0.21	1/1	2
			K.YYASEIANEVAYK.A	1575.7821	0.21	1/1	2
			R.GLVYDAAQK.R	1019.5651	0.42	1/1	2
			R.GTETSDLIFENVK.V	1507.777	0.31	1/1	2
			R.GTETSDLIFENVK.V	1507.777	0.32	1/1	3
			R.IVSIYEGTSEVQK.M	1507.8134	0.23	1/1	2
			R.IVSIYEGTSEVQK.M	1507.8134	0.22	1/1	3
			-.MLYNKEQELLR.K	1491.8119	0.00	0/0	2
			K.FQNTQFTIADM(15.995)ETK.V	1342.6227	0.00	0/0	2
			K.IAM(15.995)GTLEVGR.I	361.2035	0.00	0/0	2
			K.WDGFSTGAHEDK.M	1404.631	0.00	0/0	3
			K.WDGFSTGAHEDKMGIR.G	1862.8815	0.00	0/0	4
			R.GTETSDLIFENVKVPK.E	1861.0278	0.00	0/0	3
			R.GTSAFIVESK.W	1093.6019	0.00	0/0	2
			R.VAQESAMAK.Y	989.5216	0.00	1/0	2
WP_003430934.1	molecular chaperone DnaK	molecular			0.22	0.00	2
			R.TTPSVVAFTK.D	1105.6383	0.22	1/1	2
			K.SYTPQEISAIILQK.L	1645.9291	0.00	0/0	2
			K.SYTPQEISAIILQK.L	1645.9291	0.00	1/0	3
			R.GIPQIEVTFDIDANGIVNVSAK.D	2356.2719	0.00	0/0	3
WP_009898403.1	ImmA/IrrE family metallo-endopeptidase	ImmA/IrrE			0.22	0.00	2
			K.VIEDSSLSGYSDGFIR.K	1771.8629	0.22	1/1	2
			K.EYQSNEFAAALLM(15.995)PK.H	1513.7123	0.00	0/0	2
			K.EYQSNEFAAALLMPK.H	1766.8913	0.00	1/0	2
			K.IAEYFNVSSYAASNR.G	1718.8264	0.00	0/0	2
			K.VIEDSSLSGYSDGFIR.K	1771.8629	0.00	1/0	3
			R.IMDENTVGNK.V	1175.5856	0.00	1/0	2
			R.IMDENTVGNKVDTSK.I	1733.887	0.00	0/0	3
WP_009901809.1	(R)-2-hydroxyisocaproyl-CoA dehydratase subunit HadB	(R)-2-hydroxyisocaproyl-CoA			0.22	0.00	2
			R.AFTNAQFETR.I	1211.5935	0.22	1/1	2
			K.LLIEELEDNMK.T	1401.7425	0.00	1/0	2
			K.LMSLIQYEMQR.R	1438.7312	0.00	0/0	2
			K.QLEIISGK.K	942.575	0.00	0/0	2
			K.YRVDSLVEGK.C	1220.6765	0.00	0/0	3
			R.AAEETGLPYAGFDGDQADPR.A	2107.9528	0.00	1/0	2
			R.VVINDLLAEQYANAFK.A	1864.0176	0.00	0/0	2
WP_003419125.1	enoyl- enoyl-	enoyl-			0.23	0.1	23
			K.AKDRDAIVTGR.S	1256.7201	0.11	1/1	3
			K.VIPVVPTIALAQR.M	1403.8864	0.23	1/1	2
			K.VQVITTGAGNPAK.Y	1310.7558	0.3	1/1	2
			R.FICSEECSVHSNYK.N	1814.7968	0.00	0/0	3
WP_009901694.1	nickel pincer cofactor biosynthesis protein LarB	nickel			0.24	0.05	3
			K.IVIATGGTSDIPVADEAYHTAK.F	2285.1984	0.21	1/1	3
			R.IYDVGVAGIHR.L	1226.6772	0.28	1/1	3
			K.FLGNDVDR.I	962.4821	0.00	0/0	2
			K.IKEIYNHAEYEELSK.I	1950.018	0.00	0/0	4
			K.IQNHDIENIGK.G	1335.7147	0.00	0/0	2
			K.IVIATGGTSDIPVADEAYHTAK.F	2285.1984	0.00	0/0	2
			K.LKDLPYEDLGYANIDHHR.E	2225.131	0.00	1/0	4
			K.SDEHILGIIDK.M	1294.7133	0.00	0/0	2
			R.NGYPEVIYCEGK.S	1483.7017	0.00	0/0	2
WP_003427763.1	(R)-2-hydroxyisocaproyl-CoA dehydratase subunit beta	(R)-2-hydroxyisocaproyl-CoA			0.26	0.04	23
			K.FCDPEEYDYPLVR.K	1729.7658	0.23	1/1	2
			K.HSNTIKPSIR.S	1207.7037	0.2	1/1	3
			R.GSLIVDEVK.K	1014.5961	0.28	1/1	2
			R.TDVPAGDDALER.L	1285.615	0.29	1/1	2
			-.MEAILSK.M	846.4885	0.00	0/0	2
			K.DIDGVIFCMMK.F	1383.6601	0.00	0/0	2
			K.EVVENPNAAVK.K	1224.6714	0.00	1/0	2
			K.HSNTIKPSIR.S	1207.7037	0.00	1/0	2
			K.LNAMPEEVCSGK.K	1389.6632	0.00	0/0	2
			K.MKEVVENPNAAVK.K	1511.8382	0.00	0/0	2
			K.MKEVVENPNAAVK.K	1511.8382	0.00	1/0	3
			K.YISLVHPQNR.K	1253.6881	0.00	0/0	3
			R.DFVEVAYK.H	1025.5434	0.00	1/0	2
			R.ELEEICGYEIEEAK.I	1766.8284	0.00	1/0	2
			R.QWSNIEGCSLAYDPK.K	1822.856	0.00	0/0	2
WP_003416006.1	hypoxanthine phosphoribosyltransferase	hypoxanthine			0.28	0.86	23
			K.FIVGYGIDYAEK.Y	1429.7493	1.73	1/1	2
			K.GASVFVSDLIR.C	1190.6659	0.21	1/1	2
			K.MLTEEQIKEK.V	1331.737	0.28	1/1	3
			K.DLDVDIEGK.N	1058.5496	0.00	1/0	2
			K.MLTEEQIKEK.V	1331.737	0.00	1/0	2
WP_003438024.1	helix-turn-helix domain-containing protein	helix-turn-helix			0.28	0.02	2
			K.LYPIYPFSPQR.R	1407.7551	0.29	1/1	2
			R.GESSPTVSTLWK.I	1346.7082	0.26	1/1	2
			K.KEEVEPIVEQK.G	1410.797	0.00	0/0	2
			K.TIFHNIEVYR.-	1318.7034	0.00	0/0	3
			K.TYILESGHSIR.F	1302.6932	0.00	0/0	3
			R.FDGTLEHIYK.N	1277.6656	0.00	0/0	3
			R.QEMGISLDK.A	1075.5584	0.00	1/0	2
WP_009902635.1	alpha/beta hydrolase	alpha/beta			0.28	0.00	2
			K.ALVPLYAENFR.C	1319.7238	0.28	1/1	2
WP_009901929.1	ABC transporter ATP-binding protein	ABC			0.29	0.11	2
			K.GDFVSIVGASGSGK.S	1335.7034	0.29	1/1	2
			K.IALEANR.I	813.4709	0.39	1/1	2
			R.IVTMEDGVIVSEK.V	1474.7953	0.17	1/1	2
			K.VTALNNVNLSVQK.G	1454.8457	0.00	1/0	2
			R.FNQTILLITHDEK.I	1626.8981	0.00	1/0	3
			R.IVTM(15.995)EDGVIVSEK.V	490.2825	0.00	0/0	2
			R.SLIYRPAILLADEPTGNLDR.K	2255.2355	0.00	1/0	3
WP_004454825.1	recombination regulator RecX	recombination			0.3	0.04	2
			K.LLNFDEYDI.-	1168.5652	0.25	1/1	2
			K.LSSEFDENIIER.V	1478.7253	0.32	1/1	2
			K.SYNLVNDSVLAQK.I	1505.809	0.3	1/0	2
			K.IVNTNVNLNK.C	1183.6925	0.00	1/0	2
WP_009891775.1	ribosome biogenesis GTP-binding protein YihA/YsxC	ribosome			0.3	0.04	2
			K.SQYPAEGIPEIALAGR.S	1698.8941	0.27	1/1	2
			R.SSEITMSAVNK.S	1221.6275	0.32	1/1	2
			K.HFGYNCVVIATK.A	1463.7595	0.00	1/0	3
			K.SSIINTLLNR.R	1157.6768	0.00	0/0	2
			R.HEPTADDKLMYEWIK.H	1959.9845	0.00	0/0	3
			R.KKLQMESSEK.V	1318.753	0.00	0/0	3
			R.SSEITM(15.995)SAVNK.S	694.3207	0.00	0/0	2
WP_009903412.1	SIS domain-containing protein	SIS			0.3	0.1	23
			K.SSNFGSSDFYK.Y	1293.5877	0.32	1/1	2
			K.TIAFTSNR.N	936.5029	0.4	1/1	2
			K.TMVDVMTTEMNAIR.C	1638.7779	0.15	1/1	2
			K.TMVDVMTTEMNAIR.C	1638.7779	0.14	1/1	3
			K.VIFMGVGK.S	905.5408	0.27	1/1	2
			K.YHPGGSLGEK.L	1099.5662	0.32	1/1	2
			K.TM(15.995)VDVM(15.995)TTEMNAIR.C	278.13	0.00	0/0	2
			K.TM(15.995)VDVMTTEM(15.995)NAIR.C	278.13	0.00	0/0	2
			K.TM(15.995)VDVMTTEMNAIR.C	278.13	0.00	0/0	2
			K.TMVDVM(15.995)TTEM(15.995)NAIR.C	722.3343	0.00	0/0	2
			K.TMVDVM(15.995)TTEMNAIR.C	722.3343	0.00	0/0	2
			K.TMVDVMTTEM(15.995)NAIR.C	1184.5127	0.00	0/0	2
			K.VIFM(15.995)GVGK.S	536.3032	0.00	0/0	2
WP_009903427.1	response regulator transcription factor	response			0.3	0.00	2
			K.ELGFDDFIK.T	1138.591	0.3	1/1	2
			K.VKELGFDDFIK.T	1393.7857	0.00	0/0	3
WP_003418513.1	rubrerythrin family protein	rubrerythrin			0.31	0.13	24
			K.DAAAGENYEWTDMYAK.F	1890.8175	0.54	1/1	2
			K.EGYNQIAAIFEETANNEKEHAK.L	2590.2745	0.15	1/1	4
			K.IAYLFEAVGK.I	1165.6747	0.31	1/1	2
			K.LLENLNEGK.I	1084.6128	0.32	1/1	2
			K.NLMAGFAGESEAR.N	1379.6504	0.27	1/1	2
			K.YTYYASK.A	950.4749	0.46	1/1	2
			R.KEGYNQIAAIFEETANNEKEHAK.L	2746.4007	0.24	1/1	4
			K.EGYNQIAAIFEETANNEKEHAK.L	2590.2745	0.00	0/0	3
			K.NLM(15.995)AGFAGESEAR.N	404.2093	0.00	0/0	2
			R.NKYTYYASK.A	1220.6441	0.00	1/0	2
			R.NKYTYYASK.A	1220.6441	0.00	1/0	3
WP_009892113.1	thymidylate kinase	thymidylate			0.31	0.00	2
			K.NASDVDPYIASTFFTADR.Y	2017.9462	0.31	1/1	2
			K.ATQTEILYER.L	1250.6507	0.00	0/0	2
			K.KVEYPNYESPSSALVK.M	1895.0121	0.00	0/0	3
			K.LIIIESGSDASGK.A	1344.7501	0.00	1/0	2
WP_003417347.1	electron transfer flavoprotein subunit alpha/FixB family pr	electron			0.32	0.15	2
			K.ELITFGADK.V	1048.5805	0.35	1/1	2
			K.IAPVVIELLGEGR.K	1392.8341	0.19	1/1	2
			K.LGGVVGSSR.A	858.4923	0.44	1/1	2
			K.NVWIFAEQR.E	1189.6244	0.2	1/1	2
			K.VYVADDALLEK.Y	1290.7071	0.33	1/1	2
			R.TGEVIALDYK.I	1163.6438	0.24	1/1	2
			R.TTVLETVK.T	945.5747	0.32	1/1	2
			R.VGTGLTADCTK.L	1177.6013	0.65	1/1	2
			K.IAPVVIELLGEGRK.L	1548.9603	0.00	0/0	3
			R.VGTGLTADCTKLEIDPEDKK.I	2302.2171	0.00	1/0	4
WP_003419057.1	septum site-determining protein MinD	septum			0.32	0.27	2
			R.AIVVTNPEISAVR.D	1395.8086	0.32	1/1	2
			R.IIGLLEANEIK.E	1267.7751	0.65	1/1	2
			R.IVYDIVDVVEGTCR.L	1664.8444	0.12	1/0	2
			R.FDNLYLLPAAQTR.D	1548.83	0.00	1/0	2
			R.IVYDIVDVVEGTCR.L	1664.8444	0.00	1/0	3
			R.NLDVVMGLENR.I	1286.6653	0.00	0/0	2
WP_009901935.1	response regulator transcription factor	response			0.32	0.00	2
			K.AYLDNVEVPLTAGEYK.L	1837.9543	0.32	1/1	2
			R.THSNTNNTITCGNISLNK.V	2045.0041	0.00	0/0	3
WP_009903270.1	low-specificity L-threonine aldolase	low-specificity			0.33	0.00	2
			R.SDTVTMPTDEMR.E	1409.6167	0.33	1/1	2
			K.GLAAPMGSILAGSK.E	1327.7534	0.00	0/0	2
			K.HNLPVHLDGAR.L	1255.6786	0.00	1/0	3
			R.TIDEDESGALNPELVEK.A	1914.9503	0.00	0/0	2
WP_003419115.1	transcription factor FapR	transcription			0.35	0.27	2
			K.AQEQIFR.G	918.4923	0.54	1/1	2
			R.GKFIFEELD.-	1152.6067	0.16	1/1	2
WP_003420702.1	butyrate kinase	butyrate			0.35	0.47	23
			K.ILTINPGSTSTK.I	1286.7446	1.27	1/1	2
			K.IVDVANALDGEGPFSPER.S	1913.9564	0.28	1/1	2
			K.IVDVANALDGEGPFSPER.S	1913.9564	0.32	1/1	3
			R.VLTGEEEAQVYDN.-	1493.6886	0.38	1/1	2
WP_003430209.1	Mrp/NBP35 family ATP-binding protein	Mrp/NBP35			0.35	0.00	2
			K.VGILDSDITGPSIPR.L	1566.8617	0.35	1/0	2
			K.AYSDGSYIYPVENSNNIK.V	2090.0038	0.00	0/0	2
			K.STVTALLANK.L	1072.6492	0.00	0/0	2
WP_003425856.1	F0F1 ATP synthase subunit delta	F0F1			0.36	0.16	2
			-.MINVIANR.Y	957.543	0.27	1/1	2
			K.NVTIENVVDK.T	1185.6605	0.63	1/1	2
			K.TILGGVLVR.I	954.6226	0.41	1/1	2
			R.IGNEQIDGTVK.T	1228.6663	0.31	1/1	2
			K.NLVEIIFSK.E	1117.6747	0.00	1/0	2
			K.VVDMMTK.V	878.4606	0.00	1/0	2
WP_009887887.1	50S ribosomal protein L4	50S			0.37	0.32	23
			K.ALVVIADK.N	883.5743	1.42	1/1	2
			K.ALVVIADKNDNVIK.S	1594.9658	0.36	1/1	2
			K.ALVVIADKNDNVIK.S	1594.9658	0.38	1/1	3
			K.EFAQILNNINAAK.K	1500.83	0.58	1/1	2
			K.EFAQILNNINAAK.K	1500.83	0.59	1/1	3
			K.KALVVIADKNDNVIK.S	1751.0921	0.18	1/1	3
			K.KVEEVYA.-	892.4906	0.54	1/1	2
			K.TKEFAQILNNINAAK.K	1758.004	0.26	1/1	2
			K.TKEFAQILNNINAAK.K	1758.004	0.27	1/1	3
			K.VQNSEVIVLDALNMDAPK.T	2012.0693	0.26	1/1	2
			K.VQNSEVIVLDALNMDAPK.T	2012.0693	0.26	1/1	3
			K.YDSFIITTDAVK.K	1427.7548	0.42	1/1	2
			R.SVQWVGGGVAFAPK.P	1457.8031	0.78	1/1	2
			R.SVQWVGGGVAFAPK.P	1457.8031	0.74	1/1	3
			R.SVQWVGGGVAFAPKPR.S	1711.9603	0.22	1/1	2
			R.SVQWVGGGVAFAPKPR.S	1711.9603	0.25	1/1	3
			K.KALVVIADKNDNVIK.S	1751.0921	0.00	0/0	2
			K.VQNSEVIVLDALNM(15.995)DAPK.T	1571.8229	0.00	0/0	2
			K.VQNSEVIVLDALNM(15.995)DAPK.T	1571.8229	0.00	0/0	3
			K.YDSFIITTDAVK.K	1427.7548	0.00	0/0	3
			K.YDSFIITTDAVKK.V	1583.8811	0.00	0/0	3
WP_003421121.1	30S ribosomal protein S4	30S			0.38	0.14	234
			K.AGENLLSLLER.R	1241.698	0.2	1/1	2
			K.FKNLVEVNSR.I	1260.719	0.07	1/1	3
			K.NLVEVNSR.I	957.5243	0.52	1/1	2
			K.RNYAPGQHGQGR.K	1367.6807	0.33	1/1	3
			K.VDIPSLIVK.V	1038.6689	0.46	1/1	2
			K.VGDVIEVK.E	913.5484	0.41	1/1	2
			K.VSNYGLQLR.E	1076.5978	0.28	1/1	2
			K.VVGVPTREDIDLEIAEHLIIELYSK.-	2907.6038	0.53	1/1	4
			K.WLEANVEGMTAK.V	1403.7119	0.25	1/1	2
			R.AENMPGK.A	801.4055	0.38	1/1	2
			R.IYGVLETQFR.N	1252.6816	0.16	1/1	2
			R.NYAPGQHGQGR.K	1211.5796	0.44	1/1	2
			R.NYAPGQHGQGR.K	1211.5796	0.46	1/1	3
			K.FKNLVEVNSR.I	1260.719	0.00	0/0	2
			K.KVSNYGLQLR.E	1232.7241	0.00	0/0	2
			K.KVSNYGLQLR.E	1232.7241	0.00	0/0	3
			K.RIYGVLETQFR.N	1408.7827	0.00	0/0	2
			K.RIYGVLETQFR.N	1408.7827	0.00	1/0	3
			K.VGDVIEVKEK.S	1198.7173	0.00	0/0	2
			K.VGDVIEVKEK.S	1198.7173	0.00	0/0	3
			K.VVGVPTREDIDLEIAEHLIIELYSK.-	2907.6038	0.00	1/0	3
			K.WLEANVEGM(15.995)TAK.V	1075.5008	0.00	0/0	2
			R.QLVTHGHFTLNGNK.V	1620.8736	0.00	1/0	3
			R.QLVTHGHFTLNGNK.V	1620.8736	0.00	0/0	4
			R.RLDNVVYR.M	1061.5982	0.00	1/0	2
WP_003421367.1	F0F1 ATP synthase subunit alpha	F0F1			0.38	0.16	2
			R.IVEVPVGEALIGR.V	1378.8184	0.26	1/1	2
			R.SVYEPLQTGIK.S	1289.7231	0.49	1/1	2
			K.SIDSMIPIGR.G	1115.6009	0.00	0/0	2
			R.STIAQLVSSLEK.G	1330.7708	0.00	0/0	2
			R.VVNSLGQPIDGK.G	1281.7293	0.00	0/0	2
WP_003428218.1	recombinase RecA	recombinase			0.38	0.00	2
			K.TTVALSCVASAQK.D	1390.749	0.38	1/1	2
			K.AEIDGDM(15.995)GDSHVGLQAR.L	777.3215	0.00	0/0	3
			K.AEIDGDMGDSHVGLQAR.L	1797.8316	0.00	0/0	2
			K.AEIDGDMGDSHVGLQAR.L	1797.8316	0.00	1/0	3
			K.SNCVAIFINQLR.E	1461.7762	0.00	0/0	2
			K.VGIM(15.995)FGNPETTTGGR.A	446.2563	0.00	0/0	2
			K.VGIMFGNPETTTGGR.A	1563.7715	0.00	1/0	2
WP_003429190.1	ATP-binding cassette domain-containing protein	ATP-binding			0.38	0.1	23
			K.GIGYAFQQPPR.I	1260.6615	0.41	1/1	2
			K.KGIGYAFQQPPR.I	1416.7878	0.34	1/1	3
			K.RIEIATLFAR.D	1216.7292	0.22	1/1	3
			R.EVDNSLSGGEMK.R	1320.6231	0.45	1/1	2
			K.GIGYAFQQPPR.I	1260.6615	0.00	0/0	3
			K.LIVITGPNGGGK.S	1180.718	0.00	0/0	2
			R.EVDNSLSGGEM(15.995)K.R	1164.4969	0.00	0/0	2
WP_003438268.1	GTP-sensing pleiotropic transcriptional regulator CodY	GTP-sensing			0.39	0.05	23
			K.FSDEYTQNVLK.I	1398.7031	0.48	1/1	2
			K.ILEIFPEEHGR.L	1366.7245	0.39	1/1	3
			R.AIGEELEEEMR.K	1332.6231	0.39	1/1	2
			K.IDETLENLNGEK.I	1429.73	0.00	0/0	2
			R.AIGEELEEEM(15.995)R.K	1176.522	0.00	0/0	2
WP_003421197.1	FAD-dependent thymidylate synthase	FAD-dependent			0.4	0.09	23
			K.LISHTPEPEK.V	1205.6656	0.51	1/1	2
			K.LISHTPEPEK.V	1205.6656	0.54	1/1	3
			K.VAPILFK.K	842.563	0.5	1/1	2
			R.IASFSQQSQR.Y	1178.6044	0.32	1/1	2
			R.NLAVEMLR.E	972.5426	0.4	1/1	2
			R.SLFNFFEHR.C	1223.6087	0.36	1/1	3
			R.YVFPNACETK.M	1283.622	0.37	1/1	2
			G.SCPEGTMTCGDIVQVR.E	1836.8168	0.00	0/0	2
			K.AKELFIDSMK.K	1264.7101	0.00	0/0	3
			K.LEQFEYIIPPEIEK.I	1803.974	0.00	0/0	2
			K.TGPSCVNGSCPEGTMTCGDIVQVR.E	2610.1376	0.00	0/0	2
WP_009895825.1	YigZ family protein	YigZ			0.4	0.00	3
			K.EDLRDVAVVVTR.Y	1398.7831	0.4	1/1	3
			K.DATHNVWAYTVGK.N	1516.7674	0.00	0/0	2
			K.SEEEALEFINEIK.K	1605.8138	0.00	0/0	2
			K.VKIDYTQLGK.V	1247.7489	0.00	1/0	3
			R.YSDDGEPQGTAGIPTLEVIK.K	2146.0875	0.00	0/0	2
			R.YSDDGEPQGTAGIPTLEVIK.K	2146.0875	0.00	0/0	3
WP_009902937.1	TetR/AcrR family transcriptional regulator	TetR/AcrR			0.4	0.00	2
			K.IPFALIEEVR.N	1213.7071	0.4	1/1	2
			K.GYDSTSTQDIINLSGLSR.G	1954.9677	0.00	0/0	2
			R.NLNNVVAPNIAK.I	1321.7718	0.00	0/0	2
WP_003426450.1	adenine phosphoribosyltransferase	adenine			0.41	0.43	23
			K.LSNYDVNSLIK.Y	1320.7289	1.12	1/1	2
			K.VAIVDDLLATGGTMEAAAK.L	1902.0213	0.36	1/1	2
			K.VAIVDDLLATGGTMEAAAK.L	1902.0213	0.41	1/1	3
			K.DVTTLFK.D	878.5113	0.00	1/0	2
			K.LSNYDVNSLIKY.-	1483.7922	0.00	1/0	2
			K.VAIVDDLLATGGTM(15.995)EAAAK.L	1402.7378	0.00	0/0	2
			K.VAIVDDLLATGGTM(15.995)EAAAK.L	1402.7378	0.00	0/0	3
			R.EKLSNYDVNSLIKY.-	1768.9611	0.00	0/0	3
			R.NIDDFPKPGIDFK.D	1588.8501	0.00	1/0	2
WP_003435799.1	HAD family hydrolase	HAD			0.41	0.00	2
			K.YIAGSNLDGTR.V	1193.6041	0.41	1/1	2
			K.EILEMLYK.N	1093.6093	0.00	0/0	2
WP_003437840.1	uracil phosphoribosyltransferase	uracil			0.41	0.17	23
			K.DIPLKDVEIETPIQK.T	1822.0533	0.34	1/1	3
			K.LAIIPILR.A	935.6532	0.29	1/1	2
			K.LANLVAAPEGIAEVQK.Y	1677.9665	0.45	1/1	2
			K.LANLVAAPEGIAEVQK.Y	1677.9665	0.41	1/1	3
			K.VVETNHPLIQHK.L	1469.8355	0.52	1/1	3
			R.AGLGMVDGLVSLMPAAK.V	1684.9256	0.23	1/1	2
			R.LNEHGYIIPGLGDAGDR.L	1823.9166	0.75	1/1	3
			K.DIPLKDVEIETPIQK.T	1822.0533	0.00	1/0	2
			K.VVETNHPLIQHK.L	1469.8355	0.00	1/0	2
			K.YHDDVDIYVASVDER.L	1822.8374	0.00	0/0	2
			K.YHDDVDIYVASVDER.L	1822.8374	0.00	0/0	3
			M.SKVVETNHPLIQHK.L	1712.9937	0.00	0/0	2
			R.AGLGM(15.995)VDGLVSLM(15.995)PAAK.V	475.2465	0.00	0/0	3
			R.AGLGM(15.995)VDGLVSLMPAAK.V	475.2465	0.00	0/0	2
			R.AGLGM(15.995)VDGLVSLMPAAK.V	475.2465	0.00	0/0	3
			R.AGLGMVDGLVSLM(15.995)PAAK.V	1289.6723	0.00	0/0	2
			R.AGLGMVDGLVSLM(15.995)PAAK.V	1289.6723	0.00	0/0	3
			R.DPETLKPVEYYCK.L	1724.8695	0.00	0/0	2
			R.LNEHGYIIPGLGDAGDR.L	1823.9166	0.00	0/0	2
WP_004454497.1	sugar O-acetyltransferase	sugar			0.41	0.00	2
			K.DIPSNMIAYGNPCR.I	1634.7545	0.41	1/1	2
			K.DIPSNM(15.995)IAYGNPCR.I	703.3211	0.00	0/0	2
			R.DYNQTDSSDLEK.K	1469.6522	0.00	1/0	2
WP_003436172.1	SDR family oxidoreductase	SDR			0.42	0.17	2
			K.AAINSLTQNIATQYAK.D	1761.9625	0.21	1/1	2
			K.AALDNMSPEFIK.E	1390.7166	0.73	1/1	2
			K.FVYFNAR.E	943.4916	0.68	1/1	2
			K.GIGLASAEILAK.N	1197.7333	0.31	1/1	2
			K.IAVVTAATK.G	928.5957	0.42	1/1	2
			K.SVYLPCK.A	921.4994	0.52	1/1	2
			R.CNAVLPGLIATK.A	1311.7584	0.38	1/1	2
			R.IGEPDDIAK.A	1012.5441	0.42	1/1	2
			R.SEELANEVINK.I	1300.6875	0.47	1/1	2
			K.AAINSLTQNIATQYAK.D	1761.9625	0.00	0/0	3
			K.AAIPHMIK.N	935.5626	0.00	0/0	2
			K.AALDNM(15.995)SPEFIK.E	661.3105	0.00	0/0	2
			K.GSIVNISSIGSVLPDLSR.I	1841.0258	0.00	0/0	2
			K.NGATVYLAAR.S	1062.5822	0.00	0/0	2
			R.IAYCVSK.A	895.4837	0.00	1/0	2
WP_009887855.1	23S rRNA (guanosine(2251)-2-O)-methyltransferase RlmB	23S			0.42	0.1	23
			K.ASAGAVEYMPVCK.V	1437.6996	0.33	1/1	2
			K.VTNIVNTIK.R	1056.6543	0.47	1/1	2
			R.NPVIEAIK.S	938.5801	0.55	1/1	2
			R.TADAVGAHGVIIPK.R	1403.8137	0.36	1/1	3
			K.ASAGAVEYM(15.995)PVCK.V	925.4215	0.00	0/0	2
			R.TADAVGAHGVIIPK.R	1403.8137	0.00	0/0	2
WP_003421188.1	50S ribosomal protein L1	50S			0.43	0.1	23
			K.AKEAEQAGADFVGAEELVQK.I	2174.13	0.25	1/1	3
			K.EAEQAGADFVGAEELVQK.I	1946.9666	0.49	1/1	2
			K.EAEQAGADFVGAEELVQK.I	1946.9666	0.5	1/1	3
			K.FDETVEAHIK.L	1243.6449	0.48	1/1	3
			K.GLMPNPK.S	811.4626	0.43	1/1	2
			K.RVLVFAK.G	887.5957	0.22	1/1	2
			K.SGTVTFDVAK.A	1079.5863	0.49	1/1	2
			K.TNIIHVPVGK.V	1132.6968	0.36	1/1	2
			R.GAVVLPHGTGK.T	1090.6499	0.39	1/1	2
			R.SITVASSMGPGVK.I	1288.7061	0.43	1/1	2
			K.AKEAEQAGADFVGAEELVQK.I	2174.13	0.00	1/0	2
			K.AKEAEQAGADFVGAEELVQK.I	2174.13	0.00	0/0	4
			K.GLM(15.995)PNPK.S	347.1879	0.00	0/0	2
			K.LTENFTALM(15.995)DAIIK.A	1066.5369	0.00	0/0	2
			R.LDKTNIIHVPVGK.V	1516.9341	0.00	0/0	3
			R.SITVASSM(15.995)GPGVK.I	822.4157	0.00	0/0	2
			R.SITVASSMGPGVK.I	1288.7061	0.00	0/0	3
			R.YAGALQK.V	805.4698	0.00	1/0	2
WP_009892717.1	GntR family transcriptional regulator	GntR			0.43	0.07	2
			K.MMQEEEEVFQQK.L	1610.732	0.43	1/1	2
			R.TLIETYALEK.M	1235.7013	0.38	1/1	2
			R.TPVVQAVK.M	896.5695	0.51	1/1	2
			K.M(15.995)MQEEEEVFQQK.L	177.0824	0.00	0/0	2
			K.SNLDEILYHK.I	1286.6871	0.00	1/0	3
			K.SVELALADLELHK.A	1492.8501	0.00	0/0	3
			K.VYVPEYEYDMVK.Q	1589.7687	0.00	1/0	2
WP_009897862.1	pyruvate:ferredoxin (flavodoxin) oxidoreductase	pyruvate:ferredoxin			0.43	0.42	23
			K.ATPAAAMAK.F	886.4946	0.62	1/1	2
			K.AVFTEWLDSR.N	1250.6295	0.38	1/1	2
			K.DFILAQVR.Y	988.5706	1.82	1/1	2
			K.LAEIIPEEDAVK.Y	1381.7705	0.43	1/1	2
			K.QFPEEADGLFAK.A	1406.7082	0.47	1/1	2
			K.TVFDNLVSEQPK.N	1431.761	0.43	1/1	2
			K.VAGELLPGVFHVSAR.A	1578.8882	0.22	1/1	3
			K.VVTQLYGDR.M	1077.5819	0.48	1/1	2
			K.YYQNIVGIVEK.Y	1380.7653	0.21	1/1	2
			R.ALASQALSIFGDHQDVMAAR.Q	2129.0769	0.19	1/1	3
			R.DNALSPNHPVAR.G	1317.679	0.42	1/1	2
			R.DNALSPNHPVAR.G	1317.679	0.52	1/1	3
			R.GTAQNPDIYFQTR.E	1537.7525	0.28	1/1	2
			K.FWGLGSDGTVGANK.Q	1463.7409	0.00	0/0	2
			K.FYTVNAVK.L	996.5644	0.00	0/0	2
			K.HSLFDYYGAEDAK.Y	1570.7304	0.00	0/0	3
			K.LGQEIGLGNR.I	1083.6037	0.00	0/0	2
			K.YAQAYFDYDSK.K	1425.6453	0.00	0/0	2
			R.ALASQALSIFGDHQDVM(15.995)AAR.Q	1829.8982	0.00	0/0	3
			R.ALASQALSIFGDHQDVMAAR.Q	2129.0769	0.00	0/0	2
			R.MQLSPLDCTGCGNCADICPAK.E	2424.0445	0.00	0/0	2
WP_003421190.1	transcription termination/antitermination factor NusG	transcription			0.44	0.07	23
			K.AMGIDTTDPK.V	1103.5533	0.46	1/1	2
			K.GVTGFVGPGSKPVPLSEDEVK.A	2183.1919	0.48	1/1	3
			K.VCINAFGK.R	963.5212	0.44	1/1	2
			K.VYPSYVLVK.M	1122.6689	0.33	1/1	2
			R.GMEDCIR.Q	907.3892	0.44	1/1	2
			R.KVYPSYVLVK.M	1278.7951	0.3	1/1	2
			R.QVVVPTEEVVETTK.T	1612.8924	0.48	1/1	2
			K.AM(15.995)GIDTTDPK.V	248.1195	0.00	0/0	2
			K.GVTGFVGPGSK.P	1060.5917	0.00	0/0	2
			K.GVTGFVGPGSKPVPLSEDEVK.A	2183.1919	0.00	0/0	2
			K.MIITDESWYVVR.N	1538.7803	0.00	1/0	2
			K.VSQGPFSGQIGNIEEIDLENR.E	2330.1584	0.00	0/0	2
			K.VSQGPFSGQIGNIEEIDLENR.E	2330.1584	0.00	0/0	3
			K.VVNSDIDFEIGDTVK.V	1705.8774	0.00	0/0	2
			R.GM(15.995)EDCIR.Q	234.1038	0.00	0/0	2
			R.KVYPSYVLVK.M	1278.7951	0.00	1/0	3
			R.QVVVPTEEVVETTK.T	1612.8924	0.00	0/0	3
WP_003424529.1	isoprenyl transferase	isoprenyl			0.44	0.1	2
			K.NALIDIVK.N	940.5957	0.44	1/1	2
			K.SIPDPDLVIR.T	1151.655	0.52	1/1	2
			K.VTAIGDISALPK.T	1239.7438	0.32	1/1	2
			K.AGVETIRDIVK.E	1255.75	0.00	0/0	3
			K.IDINNIDEDIIK.N	1469.7977	0.00	1/0	2
			R.NEIAELHQNNVK.V	1463.7732	0.00	0/0	2
			R.NEIAELHQNNVK.V	1463.7732	0.00	1/0	3
WP_003421448.1	ribose-phosphate pyrophosphokinase	ribose-phosphate			0.45	0.00	2
			K.LVANLITAAGADR.V	1311.7511	0.45	1/1	2
			K.ANVCEVMNLIGDVK.G	1616.8266	0.00	0/0	2
			K.DVYACCTHGVLSGPAIER.I	2032.954	0.00	0/0	3
			R.ITAVIPYYGYAR.Q	1413.7656	0.00	0/0	2
WP_009890358.1	alpha/beta hydrolase	alpha/beta			0.45	0.00	3
			K.VVDNDTEAIFEHYK.T	1734.8465	0.45	1/1	3
			K.AFYIYNQGENWEK.V	1716.8148	0.00	1/0	2
			K.GGHPAILSNGLDFSNVAK.K	1852.9877	0.00	0/0	2
			K.VILIDFVGHGK.S	1252.7543	0.00	0/0	3
			K.VVDNDTEAIFEHYK.T	1734.8465	0.00	1/0	2
WP_009903721.1	DJ-1/PfpI family protein	DJ-1/PfpI			0.45	0.00	2
			K.VLVFLAK.G	844.5786	0.45	1/1	2
			K.EQMDEVK.L	933.4477	0.00	1/0	2
			K.NIITSYCPETAPHVAFK.L	2004.022	0.00	0/0	3
			R.QLSEFDVNVVNEPIVVDK.N	2100.1184	0.00	0/0	2
			R.QLSEFDVNVVNEPIVVDK.N	2100.1184	0.00	0/0	3
WP_009903837.1	DUF488 domain-containing protein	DUF488			0.45	0.2	2
			K.EAFNESLR.N	992.4927	0.45	1/1	2
			K.QLSIDNLLGSALTR.E	1527.8621	0.68	1/1	2
			R.IVLLGAMQEPIR.C	1366.8006	0.28	1/1	2
			-.MEIFAIGHSNYPYDK.L	1840.8899	0.00	0/0	3
			K.DVYTQEGYADFEK.V	1619.7355	0.00	0/0	2
			K.KYDINCVVDIR.E	1449.765	0.00	0/0	3
			K.VAKEDIFLNGIER.L	1558.8719	0.00	0/0	3
			R.IVLLGAM(15.995)QEPIR.C	743.4615	0.00	0/0	2
			R.TNKDVYTQEGYADFEK.V	1991.9558	0.00	0/0	3
WP_009898664.1	decarboxylating cobalt-precorrin-6B (C(15))-methyltransferase	decarboxylating			0.46	0.00	2
			K.GYAPINLGLNVK.V	1313.7707	0.46	1/1	2
			K.NDDAIELIEK.N	1214.6394	0.00	0/0	2
			R.NSEFITGK.V	950.5073	0.00	0/0	2
WP_009903196.1	ribosome-associated translation inhibitor RaiA	ribosome-associated			0.46	0.12	2
			-.MQIIVSGR.Q	930.5321	0.31	1/1	2
			K.AGGYGLIEQD.-	1049.5029	0.46	1/1	2
			K.YLDPESEVK.V	1134.5809	0.55	1/1	2
			K.VEVTIIPINGQIIR.A	1591.9661	0.00	0/0	2
			R.NQDNFEINIVYK.R	1551.7933	0.00	1/0	2
			R.QKVEVTIIPINGQIIR.A	1877.1543	0.00	0/0	3
WP_003435673.1	50S ribosomal protein L5	50S			0.47	0.26	23
			K.EQLIFPEIEYDK.I	1578.8181	1.24	1/1	2
			K.EQLIFPEIEYDKIDK.V	1964.0588	0.52	1/1	2
			K.EQLIFPEIEYDKIDK.V	1964.0588	0.54	1/1	3
			K.EVAPALMEK.F	1042.5733	0.52	1/1	2
			K.GVEELEMISGQK.P	1374.7065	0.43	1/1	2
			K.GVEELEMISGQKPVITK.A	1942.089	0.42	1/1	2
			K.GVEELEMISGQKPVITK.A	1942.089	0.42	1/1	3
			K.IVINMGIGDAR.E	1185.654	0.27	1/1	2
			K.LLGMPFSK.-	947.5514	0.33	1/1	2
			K.LREGMPIGTK.V	1156.6638	0.25	1/1	2
			K.LVSVSLPR.V	897.5648	0.47	1/1	2
			K.MFYFMDK.L	1036.4762	0.5	1/1	2
			K.NVMEIPK.L	885.4994	0.63	1/1	2
			K.TDEEARELLK.L	1258.6769	0.07	1/1	2
			K.TDEEARELLK.L	1258.6769	0.08	1/1	3
			R.EGMPIGTK.V	887.4786	0.75	1/1	2
			R.GMDIIFVTTAK.T	1250.6944	0.29	1/1	2
			R.GNYALGVK.E	876.5069	0.66	1/1	2
			R.GVNPNAFDGR.G	1073.5254	0.64	1/1	2
			K.EQLIFPEIEYDKIDKVR.G	2219.2283	0.00	0/0	3
			K.EQLIFPEIEYDKIDKVR.G	2219.2283	0.00	0/0	4
			K.EVAPALM(15.995)EK.F	757.4044	0.00	0/0	2
			K.GVEELEM(15.995)ISGQK.P	833.3841	0.00	0/0	2
			K.GVEELEM(15.995)ISGQKPVITK.A	833.3841	0.00	0/0	2
			K.GVEELEM(15.995)ISGQKPVITK.A	833.3841	0.00	0/0	3
			K.GVEELEMISGQKPVITK.A	1942.089	0.00	1/0	4
			K.IVINM(15.995)GIGDAR.E	616.3618	0.00	0/0	2
			K.IVINMGIGDARENPK.G	1681.9185	0.00	0/0	3
			K.M(15.995)FYFMDK.L	177.0824	0.00	0/0	2
			K.MFYFM(15.995)DK.L	765.323	0.00	0/0	2
			K.YM(15.995)KEVAPALMEK.F	340.1457	0.00	0/0	3
			K.YMKEVAPALMEK.F	1492.8033	0.00	0/0	3
			R.ADKM(15.995)FYFMDK.L	519.2727	0.00	0/0	3
			R.ADKMFYFMDK.L	1378.6665	0.00	1/0	3
			R.GM(15.995)DIIFVTTAK.T	234.1038	0.00	0/0	2
			R.GVNPNAFDGRGNYALGVK.E	1904.9938	0.00	0/0	3
			R.KSVANFK.L	876.5433	0.00	1/0	2
WP_003419111.1	DUF177 domain-containing protein	DUF177			0.49	0.00	2
			K.IDTISYCDEIYK.L	1574.7538	0.49	1/1	2
			K.LVSPVNLK.G	924.6008	0.00	1/0	2
WP_009888208.1	hydrolase	hydrolase			0.49	0.00	2
			K.VILLDTNYNK.D	1247.7125	0.49	1/1	2
			K.IVEGATEVISTLSK.G	1501.8603	0.00	0/0	3
			R.DVYAEFNNK.Y	1154.5608	0.00	1/0	2
			R.HECLTDVTK.N	1157.5751	0.00	1/0	2
WP_009903387.1	hypothetical protein	hypothetical			0.49	0.00	2
			K.IDESPIPLGYFK.D	1433.7806	0.49	1/1	2
			K.TENTMLDCR.C	1166.506	0.00	0/0	2
WP_011860916.1	translation initiation factor IF-3	translation			0.49	0.49	23
			K.APAFEGNNMVVIIDPK.K	1769.9386	0.62	1/1	2
			K.APAFEGNNMVVIIDPK.K	1769.9386	0.59	1/1	3
			K.EAQAMANSK.N	1004.4961	0.47	1/1	2
			K.ELAINEQIK.D	1112.6441	2.01	1/1	2
			K.NLDLVQISPNANPPVCK.I	1935.0329	0.42	1/1	2
			K.NLDLVQISPNANPPVCK.I	1935.0329	0.45	1/1	3
			R.LRPGIEQNDLNTK.A	1552.8573	0.53	1/1	2
			R.LRPGIEQNDLNTK.A	1552.8573	0.51	1/1	3
			R.VLSPTGEQLGVMPTK.E	1611.8906	0.39	1/1	2
			R.VLSPTGEQLGVMPTK.E	1611.8906	0.38	1/1	3
			K.APAFEGNNM(15.995)VVIIDPK.K	977.4277	0.00	0/0	2
			K.APAFEGNNMVVIIDPKK.-	1927.0682	0.00	0/0	3
			K.EFGEPTK.A	862.4436	0.00	1/0	2
			K.ELAINEQIKDKEIR.V	1782.0251	0.00	0/0	2
			K.ELAINEQIKDKEIR.V	1782.0251	0.00	1/0	4
			M.SKELAINEQIK.D	1355.8024	0.00	0/0	2
			R.VLSPTGEQLGVM(15.995)PTK.E	1257.6639	0.00	0/0	2
			R.VLSPTGEQLGVM(15.995)PTK.E	1257.6639	0.00	0/0	3
WP_003416023.1	phosphate propanoyltransferase	phosphate			0.51	0.35	23
			-.MKLPIALSNK.H	1197.7519	0.25	1/1	3
			K.APIKESGDIAGTPGVK.L	1622.9243	0.3	1/1	2
			K.APIKESGDIAGTPGVK.L	1622.9243	0.31	1/1	3
			K.EGVIVASR.H	857.4971	0.66	1/1	2
			K.ESGDIAGTPGVK.L	1185.6241	0.97	1/1	2
			K.FKPLSQPGQYACEEK.V	1865.9427	1.15	1/1	2
			K.FKPLSQPGQYACEEK.V	1865.9427	1.15	1/1	3
			K.LPIALSNK.H	910.5852	0.63	1/1	2
			K.LVGPAGEVEMK.E	1184.6475	0.51	1/1	2
			K.NGDLVELIVD.-	1113.5918	0.4	1/1	2
			R.ALVFENVLVR.A	1186.7074	0.25	1/1	2
			-.M(15.995)KLPIALSNK.H	177.0824	0.00	0/0	3
			K.FKPLSQPGQYACEEKVDLVGPK.G	2602.391	0.00	1/0	3
			K.LVGPAGEVEM(15.995)K.E	1028.5212	0.00	0/0	2
			K.LVGPAGEVEM(15.995)KEGVIVASR.H	1028.5212	0.00	0/0	3
			R.ASDSFNLEM(15.995)HVDM(15.995)EEGNAAGVK.N	1040.4485	0.00	0/0	3
			R.ASDSFNLEM(15.995)HVDMEEGNAAGVK.N	1040.4485	0.00	0/0	3
			R.HIHM(15.995)SNEDAAK.F	564.2842	0.00	0/0	2
			R.HIHM(15.995)SNEDAAK.F	564.2842	0.00	0/0	3
			R.HIHMSNEDAAK.F	1307.6292	0.00	1/0	2
			R.HIHMSNEDAAK.F	1307.6292	0.00	1/0	3
WP_009897067.1	transcriptional repressor LexA	transcriptional			0.51	0.12	2
			-.MYLDLTEK.Q	1067.5573	0.5	1/1	2
			K.GSNNFVLR.V	933.5032	0.56	1/1	2
			K.QVLILEFIK.S	1157.7424	0.3	1/1	2
			R.EICTAVGLR.S	1045.559	0.52	1/1	2
			R.STSTVHSHLNK.L	1265.6728	0.00	0/0	2
			R.STSTVHSHLNK.L	1265.6728	0.00	1/0	3
			R.STSTVHSHLNKLEK.L	1663.9257	0.00	1/0	3
			R.STSTVHSHLNKLEK.L	1663.9257	0.00	1/0	4
WP_009902542.1	lactate utilization protein	lactate			0.51	0.23	2
			K.VILVGENLGL.-	1053.6434	0.43	1/1	2
			R.TIASPAVVQR.F	1068.6291	0.87	1/1	2
			R.VAAMIFGPK.N	988.578	0.51	1/1	2
			K.EM(15.995)SVQTAVR.E	306.1249	0.00	0/0	2
			K.EMSVQTAVR.E	1047.5383	0.00	0/0	2
			K.NIDDAIQR.T	971.5036	0.00	1/0	2
			K.NVIVVAGMNK.I	1099.6424	0.00	1/0	2
			R.YFDAYYCK.T	1184.5212	0.00	1/0	2
WP_009903855.1	16S rRNA (guanine(527)-N(7))-methyltransferase RsmG	16S			0.52	0.01	2
			K.GPNANLELEESQK.A	1483.7518	0.53	1/1	2
			R.INFLEEVSR.V	1133.6081	0.52	1/1	2
			K.AIDVLGLEYIEK.I	1417.8068	0.00	1/0	2
			K.HFLDSISAVK.N	1171.6601	0.00	0/0	2
			K.NGIEGFNIDTNDSM(15.995)LEK.F	1553.6668	0.00	0/0	2
			K.NGIEGFNIDTNDSMLEK.F	1952.9231	0.00	0/0	2
			K.RINFLEEVSR.V	1289.7092	0.00	0/0	3
			R.VLELDNITFIHGR.A	1553.8566	0.00	0/0	3
WP_003434301.1	nitroreductase family protein	nitroreductase			0.53	0.54	2
			K.GIQNEINDNGLLPGSR.Q	1723.8853	0.47	1/1	2
			K.IIEAGINAPSSK.N	1254.7184	0.59	1/1	2
			R.FVVITEK.E	890.5477	1.52	1/1	2
			R.LQLSDVTEWR.-	1273.6667	0.33	1/1	2
			K.NQSISHETIEK.I	1340.6936	0.00	1/0	2
			K.NQSISHETIEK.I	1340.6936	0.00	1/0	3
			K.YKNQSISHETIEK.I	1659.8832	0.00	1/0	3
			K.YKNQSISHETIEK.I	1659.8832	0.00	1/0	4
WP_009901770.1	iron-containing alcohol dehydrogenase	iron-containing			0.53	0.00	2
			K.ASIIDPELMVTMPK.H	1599.8616	0.53	1/1	2
			-.MNFNYNLPVNILFGRGR.I	2053.0761	0.00	0/0	2
			K.ASIIDPELM(15.995)VTMPK.H	1015.526	0.00	0/0	2
			K.VYNDVNDLEAWEK.I	1649.7937	0.00	0/0	2
WP_003430597.1	UMP kinase	UMP			0.54	0.31	23
			K.FTELSYMEVIQK.E	1542.8004	0.49	1/1	2
			K.GENIGTTVK.-	973.5444	1.03	1/1	2
			K.LSGEALAGER.G	1029.5455	0.63	1/1	2
			K.VFELTTENIIR.A	1361.7555	0.32	1/1	2
			K.VMDSTATSLCMDNK.I	1627.7256	0.99	1/1	2
			K.VMDSTATSLCMDNKIPIK.V	2108.0761	0.2	1/1	3
			R.AVKGENIGTTVK.-	1299.7762	0.26	1/1	3
			R.VQTAIDMR.Q	960.5063	0.59	1/1	2
			K.FTELSYM(15.995)EVIQK.E	917.4205	0.00	0/0	2
			K.KFTELSYM(15.995)EVIQK.E	1073.5467	0.00	0/0	3
			K.NVDAVYDKDPK.V	1346.7082	0.00	1/0	2
			K.VM(15.995)DSTATSLCM(15.995)DNK.I	276.1508	0.00	0/0	2
			K.VM(15.995)DSTATSLCMDNK.I	276.1508	0.00	0/0	2
			K.VM(15.995)DSTATSLCMDNKIPIK.V	276.1508	0.00	0/0	3
			K.VMDSTATSLCMDNKIPIK.V	2108.0761	0.00	0/0	2
			R.AAEM(15.995)EAEVILLAK.N	448.1992	0.00	0/0	2
WP_009891688.1	hypoxanthine phosphoribosyltransferase	hypoxanthine			0.54	0.15	23
			K.CCVLLDKPSR.R	1302.6788	0.59	1/1	3
			R.NINLPLR.V	866.5338	0.66	1/1	2
			R.NVPYIFNVTDEDR.-	1608.7784	0.49	1/1	2
			R.VNFMTTSSYGNNEESTGK.V	2021.9081	0.32	1/1	2
			K.KWEVLYSEEK.I	1393.7493	0.00	0/0	3
			K.NLMVVSLLK.G	1071.6726	0.00	0/0	2
			R.ELGAIIEK.D	927.5641	0.00	1/0	2
WP_009898087.1	pentapeptide repeat-containing protein	pentapeptide			0.54	0.08	2
			K.NADLSGASFR.F	1064.5251	0.49	1/1	2
			R.VGETIVAEDFNENR.W	1619.7791	0.6	1/1	2
			K.LYCPETGAFIGYK.K	1573.7851	0.00	0/0	2
			R.AYADENFIYR.V	1288.6088	0.00	0/0	2
			R.GANLENSNLEHATLNGVISDESTR.F	2569.245	0.00	0/0	3
			R.MVQLLIPSDAK.R	1269.7366	0.00	0/0	2
WP_009892314.1	sulfurtransferase-like selenium metabolism protein YedF	sulfurtransferase-like			0.55	0.14	23
			K.GFIYTLTESKPYPK.Y	1727.9579	0.33	1/0	3
			K.LSAENEETIENLK.I	1544.7934	0.6	1/1	2
			K.MGLGNDELGK.V	1088.5536	0.55	1/1	2
			K.ESELDNTCIFISSDK.M	1812.8452	0.00	0/0	2
			K.M(15.995)GLGNDELGK.V	177.0824	0.00	0/0	2
			K.YVLLVNGGVK.L	1116.6907	0.00	0/0	2
			R.GLACPKPVINTK.R	1380.8163	0.00	0/0	3
WP_009897948.1	cell wall-binding cysteine protease Cwp84	cell			0.55	0.62	23
			K.IIDKFYPSSDLK.Y	1508.849	0.35	1/1	3
			K.SELQGADEFLNSSK.I	1579.773	1.7	1/1	2
			K.SQGDLIDGLAVGALGAK.T	1639.9145	0.53	1/1	2
			K.SQGDLIDGLAVGALGAK.T	1639.9145	0.56	1/1	3
			K.IIDKFYPSSDLK.Y	1508.849	0.00	0/0	2
			K.NVQTQLSNM(15.995)GISVER.I	1061.5175	0.00	0/0	2
			K.NVQTQLSNMGISVER.I	1702.8672	0.00	0/0	2
			K.TDSPVVLVGNKLDESQK.N	1913.0551	0.00	1/0	3
			K.TSISLAQK.L	902.5437	0.00	0/0	2
			R.VGGNGNENAFNELNTLLGK.-	2017.031	0.00	0/0	2
			R.VGGNGNENAFNELNTLLGK.-	2017.031	0.00	0/0	3
WP_003438534.1	Cof-type HAD-IIB family hydrolase	Cof-type			0.56	0.00	2
			K.QSANYVVDSVK.S	1264.6663	0.56	1/1	2
WP_003439746.1	tRNA-binding protein	tRNA-binding			0.56	0.11	2
			K.FGSPTSDSER.A	1109.4989	0.7	1/1	2
			K.LGCIQAK.V	844.4841	0.64	1/1	2
			K.SLYPVGTYNVSK.L	1382.7446	0.48	1/1	2
			R.TSSEALVR.R	889.4869	0.48	1/1	2
			K.EYADGKDIETK.I	1351.6871	0.00	1/0	3
WP_009890612.1	pyruvate, phosphate dikinase	pyruvate,			0.56	0.21	2
			K.YVYSFGEGSK.D	1191.5812	0.41	1/1	2
			R.FAYDSYR.R	948.4341	0.71	1/1	2
			K.GANLAEMTK.I	989.5216	0.00	1/0	2
			K.GYTVDTELTTDDLK.E	1625.8036	0.00	0/0	2
			R.FIQM(15.995)FSDVAMEVPK.Y	565.2934	0.00	0/0	2
WP_003429300.1	membrane protein insertase YidC	membrane			0.57	0.00	2
			K.AMQDIQPR.I	985.5015	0.57	1/1	2
			K.AM(15.995)QDIQPR.I	248.1195	0.00	0/0	2
			K.QNEEIVK.L	914.5073	0.00	1/0	2
WP_003429754.1	ABC transporter ATP-binding protein	ABC			0.57	0.08	23
			K.QKPLQLSGGQQQR.V	1522.858	0.63	1/1	3
			R.EIMELLTR.L	1031.5685	0.47	1/1	2
			R.YIFDGTDVTNLSENER.S	1900.8884	0.57	1/1	2
			K.TIIMVTHDQDLTK.Y	1569.8436	0.00	0/0	3
			R.CLANDPQIIFADEPTGALDSETSR.E	2648.2469	0.00	0/0	2
			R.CLANDPQIIFADEPTGALDSETSR.E	2648.2469	0.00	0/0	3
WP_003434235.1	protein jag	protein			0.57	0.43	23
			K.AIAELNLK.A	926.5801	1.22	1/1	2
			K.DGTYEIFVIER.E	1368.6925	0.38	1/1	2
			K.EAASLIGR.R	843.4814	0.74	1/1	2
			K.GFLGFIGAK.D	964.5746	0.38	1/1	2
			R.RIIHSALQNDK.Y	1349.7779	1.3	1/1	3
			R.VLVDIENYR.S	1147.6237	0.41	1/1	2
			K.SKEEAISK.A	974.5648	0.00	1/0	2
			K.YVITYSEGTDPYR.R	1590.7566	0.00	1/0	2
			K.YVITYSEGTDPYRR.L	1746.8577	0.00	0/0	2
			R.IIHSALQNDK.Y	1193.6768	0.00	0/0	2
WP_003436292.1	ABC transporter ATP-binding protein	ABC			0.57	0.00	2
			K.VFLMDEPLSNLDAK.L	1646.859	0.57	1/1	2
			K.VFLM(15.995)DEPLSNLDAK.L	536.3032	0.00	0/0	2
WP_009891147.1	YhbD family protein	YhbD			0.57	0.00	2
			K.SAFTGQETFFPR.D	1414.6881	0.57	1/1	2
			K.EVICNYTK.E	1081.5478	0.00	1/0	2
WP_009902682.1	cupin domain-containing protein	cupin			0.57	0.00	2
			K.NSDLSTGLISQIER.N	1559.8155	0.57	1/1	2
WP_009903205.1	sn-glycerol-3-phosphate ABC transporter ATP-binding protein UgpC	sn-glycerol-3-phosphate			0.57	0.00	2
			K.VFLMDEPLSNLDAK.L	1646.859	0.57	1/1	2
			K.VFLM(15.995)DEPLSNLDAK.L	536.3032	0.00	0/0	2
WP_003439113.1	lipoprotein	lipoprotein			0.58	0.11	2
			K.EVTTMITYTK.K	1241.6577	0.41	1/1	2
			K.GISDALTEAEYK.Q	1351.6871	0.58	1/1	2
			K.IYETIVK.L	920.5583	0.7	1/1	2
			K.LCEGIYTI.-	995.4998	0.48	1/1	2
			K.MIIDLYNK.K	1064.594	0.59	1/1	2
			K.QIQTYNSK.D	1036.5553	0.71	1/1	2
			K.VSMIAQLTPLYGK.E	1475.8422	0.73	1/1	2
			K.WQPPSNIQK.L	1152.6291	0.56	1/1	2
			K.EKEVQDDM(15.995)TK.M	1048.4747	0.00	0/0	3
			K.EKEVQDDMTK.M	1305.6486	0.00	1/0	2
			K.EKEVQDDMTK.M	1305.6486	0.00	1/0	3
			K.EVQDDMTK.M	1020.4798	0.00	1/0	2
			K.EVTTM(15.995)ITYTK.K	607.2887	0.00	0/0	2
			K.SNFEANLAALEM(15.995)YK.Y	1336.6333	0.00	0/0	2
			K.SNFEANLAALEMYK.Y	1655.8229	0.00	1/0	2
			K.SYVTDEKNYDKK.E	1600.8348	0.00	1/0	3
			K.TVTVESSSK.D	992.539	0.00	1/0	2
			K.TVTVESSSKDK.I	1263.6922	0.00	0/0	2
			K.TVTVESSSKDK.I	1263.6922	0.00	1/0	3
			K.VM(15.995)SEANTLVK.S	276.1508	0.00	0/0	2
			K.VMSEANTLVK.S	1146.6318	0.00	0/0	2
WP_009891708.1	DUF4364 family protein	DUF4364			0.58	0.12	2
			K.QSDNEFIVNLR.V	1361.6939	0.67	1/1	2
			R.GVESLEYFFNR.I	1387.6772	0.5	1/1	2
			K.DSDREYYALTQR.G	1543.7267	0.00	0/0	3
			R.IPTSVTEK.I	929.5434	0.00	1/0	2
WP_003428442.1	3-oxoacyl- 3-oxoacyl-	3-oxoacyl-			0.59	0.38	2
			K.AGVIGFTK.A	847.5167	0.59	1/1	2
			K.ESTLANIPK.K	1027.5914	1.02	1/1	2
			K.GVFNCTK.A	880.4477	0.53	1/1	2
			K.IDILVNNAGITK.D	1325.7919	0.29	1/1	2
			K.VLSDDVK.E	830.4749	0.94	1/1	2
			R.MKEEDFDR.V	1124.5172	1.27	1/1	2
			R.NININAVAPGFIETDMTK.V	2004.0431	0.27	1/1	2
			-.M(15.995)INLTGQVAVVTGGSR.G	177.0824	0.00	0/0	2
			K.AVTKPMMK.K	988.5813	0.00	1/0	2
			K.TKNEIESM(15.995)GVK.C	1006.5005	0.00	0/0	3
			K.TKNEIESMGVK.C	1318.7166	0.00	0/0	2
			K.TKNEIESMGVK.C	1318.7166	0.00	0/0	3
			K.VLSDDVKESTLANIPK.K	1812.0244	0.00	0/0	2
			R.IINM(15.995)TSVVGIM(15.995)GNAGQTNYCASK.A	517.2934	0.00	0/0	3
			R.IINM(15.995)TSVVGIMGNAGQTNYCASK.A	517.2934	0.00	0/0	3
			R.NININAVAPGFIETDM(15.995)TK.V	1745.8658	0.00	0/0	2
			R.NININAVAPGFIETDM(15.995)TK.V	1745.8658	0.00	0/0	3
			R.NININAVAPGFIETDMTK.V	2004.0431	0.00	1/0	3
WP_003437535.1	NAD(+) synthase	NAD(+)			0.59	0.00	2
			K.FGDGGVDILPIANLTK.G	1684.94	0.59	1/1	2
			K.SNPQDREDALK.V	1327.6732	0.00	1/0	2
WP_003438086.1	FadR family transcriptional regulator	FadR			0.59	0.00	2
			R.VLETMGVIESR.Q	1260.6748	0.59	1/1	2
			K.HIIDEMR.V	940.48	0.00	1/0	2
			K.IIAEPFNENILLK.Q	1568.9178	0.00	1/0	2
			R.ELSEQMNVSR.T	1219.5867	0.00	0/0	2
WP_003428379.1	NUDIX hydrolase	NUDIX			0.6	0.19	2
			K.TSIGLLLVK.D	998.674	0.47	1/1	2
			K.VDTVEIPGQGYQK.R	1488.7824	0.74	1/1	2
			R.ELKEETGYSAK.N	1337.7079	0.00	1/0	3
WP_003436135.1	zinc metalloprotease Zmp1	zinc			0.6	0.00	2
			K.TWDDVPGLGGSTVALR.I	1670.8628	0.6	1/1	2
			S.SVPVSAHADSTTIQQNK.D	1837.9534	0.00	0/0	3
WP_004454829.1	hypothetical protein	hypothetical			0.6	0.08	2
			K.DFDVTVPLLSQEQR.D	1673.8625	0.66	1/1	2
			K.FLFSQNQR.I	1066.556	0.55	1/1	2
WP_009896192.1	cysteine desulfurase NifS	cysteine			0.6	0.08	23
			K.GVGALYIR.K	875.5229	0.54	1/1	2
			R.LHNFVHGGAQEK.S	1391.731	0.65	1/1	3
			K.ELGIDLMSMSSHK.I	1502.7473	0.00	0/0	3
			K.ENMQNHVETLTR.L	1498.7198	0.00	0/0	2
			K.ENMQNHVETLTR.L	1498.7198	0.00	0/0	3
			K.ILFHTDAVQATGNIPVDVK.E	2094.1555	0.00	0/0	3
			R.AGTENIPAIVGYGK.A	1444.7926	0.00	0/0	2
WP_003416451.1	RidA family protein	RidA			0.61	0.00	2
			K.AILAESGADFSNVVK.T	1575.8508	0.61	1/1	2
			K.AILAESGADFSNVVK.T	1575.8508	0.00	1/0	3
WP_003439494.1	TerD family protein	TerD			0.61	0.57	2
			K.FNALGIGQNEELR.E	1487.7732	1.81	1/1	2
			K.NYDLDAFAIALTNQDK.M	1867.9397	0.41	1/1	2
			K.YNLQEDFSGK.V	1255.6085	0.63	1/1	2
			R.DQDFGQMNNSFIR.L	1598.7147	0.55	1/1	2
			R.GDLVYFGNLK.H	1180.6492	0.61	1/1	2
			K.AIIHTGDNLTGK.G	1294.7245	0.00	0/0	2
			K.KRDQDFGQMNNSFIR.L	1911.9455	0.00	0/0	3
			K.NYDLDAFAIALTNQDK.M	1867.9397	0.00	1/0	3
			R.DQDFGQM(15.995)NNSFIR.L	867.3433	0.00	0/0	2
			R.ELINTYK.-	935.5328	0.00	1/0	2
			R.GDLVYFGNLKHPSK.A	1657.9192	0.00	0/0	4
			R.LIDSNSKQELFK.Y	1504.8501	0.00	0/0	2
WP_009903260.1	HAD family hydrolase	HAD			0.61	0.38	2
			K.FVGIPFIYAK.Y	1209.7162	0.58	1/1	2
			K.LINPIYVGDTQGDANSAK.F	1932.0034	1.25	1/1	2
			R.SLMGLSFEEIANR.L	1493.7548	0.61	1/1	2
			K.LINPIYVGDTQGDANSAK.F	1932.0034	0.00	1/0	3
			R.MNLLNECSLK.E	1276.6519	0.00	0/0	2
WP_003417965.1	helix-turn-helix transcriptional regulator	helix-turn-helix			0.62	0.5	23
			K.FENMSEVFYK.A	1348.6373	0.73	1/1	2
			K.NVVIGNR.I	798.4712	1.58	1/1	2
			K.QLSQLLEEPHAK.I	1447.8035	0.52	1/1	3
			K.VGILELVEEK.I	1183.7064	0.52	1/1	2
			K.QLSQLLEEPHAK.I	1447.8035	0.00	0/0	2
WP_003420704.1	hypothetical protein	hypothetical			0.62	0.07	2
			K.DLEGEIFPIK.L	1215.6751	0.57	1/1	2
			K.TQTSEEVIQYIK.E	1493.7977	0.67	1/1	2
			R.FTTIDDVLR.G	1106.5972	0.00	0/0	2
WP_003420711.1	2-oxoacid:acceptor oxidoreductase family protein	2-oxoacid:acceptor			0.62	0.18	23
			K.EVSWLPSYGPEMR.G	1577.7548	0.64	1/1	2
			K.GMDATCSK.A	924.4045	0.27	1/1	2
			K.IIVNSSLIK.E	1041.6798	0.63	1/1	2
			K.VSDTVDIESVLEAFKK.V	1864.0275	0.61	1/1	3
			K.EVSWLPSYGPEM(15.995)R.G	1421.6537	0.00	0/0	2
			K.EVSWLPSYGPEMR.G	1577.7548	0.00	0/0	3
			K.FKDDVIPGGK.I	1158.6649	0.00	1/0	2
WP_003426384.1	response regulator transcription factor	response			0.62	0.00	2
			K.TTAPILFLTAK.T	1230.7588	0.62	1/1	2
WP_009892132.1	GntR family transcriptional regulator	GntR			0.62	0.46	234
			K.AEQFMIDK.A	1036.5263	0.65	1/1	2
			K.DIMDVLEVR.A	1116.5849	1.12	1/1	2
			K.KYATEHIEK.A	1201.6707	0.59	1/1	3
			K.LNLDNYKPLR.D	1300.7503	0.4	1/1	3
			K.STLESDVDALLK.L	1345.7341	1.5	1/1	2
			K.YLLDAIIK.G	1003.6318	1.56	1/1	2
			R.ASLEGLAAYLAAER.I	1461.7827	0.33	1/1	2
			R.DVVFENLR.E	1018.5447	0.58	1/1	2
			R.EAILEGK.L	814.48	0.53	1/1	2
			R.VTYMSAYDTSHNIVEEHK.Y	2180.0289	1.21	1/1	4
			K.DISEEFKK.S	1078.591	0.00	0/0	2
			K.YATEHIEK.A	1045.5444	0.00	1/0	2
			R.ASLEGLAAYLAAER.I	1461.7827	0.00	1/0	3
			R.ISDEDIKK.L	1030.591	0.00	1/0	2
			R.KGAYVANM(15.995)SLK.D	908.479	0.00	0/0	3
			R.VTYMSAYDTSHNIVEEHK.Y	2180.0289	0.00	0/0	3
WP_003416253.1	zinc metallopeptidase	zinc			0.63	0.25	23
			K.GYAPLQIR.S	944.5444	0.71	1/1	2
			R.AIVQLGNLGIIDESESR.Q	1840.9894	0.46	1/1	2
			R.AIVQLGNLGIIDESESR.Q	1840.9894	0.42	1/1	3
			R.GHLSDHYDPR.R	1223.5683	0.99	1/1	2
			R.GHLSDHYDPR.R	1223.5683	0.96	1/1	3
			R.VLDSNGLYDVK.I	1277.6867	0.55	1/1	2
WP_003419758.1	DUF3867 domain-containing protein	DUF3867			0.64	0.08	23
			K.MSMAEFSR.K	985.4361	0.66	1/1	2
			K.VSTEDLESFKK.S	1365.7392	0.64	1/1	3
			K.VVMCETTNKYDY.-	1577.7106	0.51	1/1	2
			K.IMLCSDR.K	921.4412	0.00	0/0	2
			K.NDLNDINVIIDQEK.I	1697.8836	0.00	1/0	2
			K.VSTEDLESFKK.S	1365.7392	0.00	0/0	2
			K.VVM(15.995)CETTNKYDY.-	375.2192	0.00	0/0	2
			R.NFGIDPSTAGFM(15.995)SNNTSSK.V	1283.5856	0.00	0/0	2
			R.NFGIDPSTAGFMSNNTSSK.V	2030.9449	0.00	0/0	2
			R.NFGIDPSTAGFMSNNTSSK.V	2030.9449	0.00	0/0	3
			R.YGM(15.995)DTEEVEK.Q	397.1671	0.00	0/0	2
			R.YGMDTEEVEK.Q	1255.5642	0.00	1/0	2
WP_003428474.1	FprA family A-type flavoprotein	FprA			0.64	11.23	2
			K.HVLSAVDK.V	923.544	20	0/0	2
			K.TVLFDTVK.A	977.5797	0.64	1/1	2
			K.VILLGSPTINK.T	1209.7697	0.46	1/1	2
			K.DGEILNIGK.R	1013.5757	0.00	1/0	2
			K.HYYDCIVKPFAK.H	1623.8483	0.00	1/0	3
			K.IDYVVIHHTEPDHAGSLK.Y	2087.0881	0.00	1/0	4
			K.YLLDINPNIEVYCTK.A	1910.9893	0.00	0/0	2
WP_003432361.1	response regulator transcription factor	response			0.64	0.00	2
			K.LLNFFIENPEK.T	1418.781	0.64	1/1	2
			K.YDLIFLEIILSDGDGWTLCK.K	2427.2477	0.00	0/0	3
WP_009902746.1	cell wall-binding cysteine protease Cwp13	cell			0.64	0.00	2
			K.TGSPVILVGDK.L	1140.6754	0.64	1/1	2
			K.NQNDLIDGLAVGPLGAK.T	1749.9625	0.00	0/0	2
			K.SYIIGGTASLSNNLESK.L	1808.952	0.00	0/0	2
			K.TSLLLAQK.L	928.5957	0.00	0/0	2
WP_011861621.1	peptidoglycan editing factor PgeF	peptidoglycan			0.64	0.00	2
			R.DGDALITNLEK.V	1243.666	0.64	1/1	2
			K.EYVNLSGNCEELDEK.L	1853.8353	0.00	1/0	2
WP_003434417.1	ribosome-associated translation inhibitor RaiA	ribosome-associated			0.65	0.35	23
			-.MNIIISGK.Q	930.5572	0.65	1/1	2
			K.LDNYIHPDTDVK.V	1484.7511	0.82	1/1	3
			K.NIDSDEIAVVYK.R	1420.745	1.26	1/1	2
			K.NIDSDEIAVVYKR.N	1576.8461	0.24	1/1	2
			K.NIDSDEIAVVYKR.N	1576.8461	0.25	1/1	3
			K.QIELTDAIK.N	1085.6332	0.72	1/1	2
			R.NNGGYGIIEHE.-	1229.5677	0.63	1/1	2
			K.LDNYIHPDTDVK.V	1484.7511	0.00	0/0	2
			K.LSKLDNYIHPDTDVK.V	1841.9968	0.00	0/0	3
			R.AEDM(15.995)QENLYTAIDVVYDK.L	492.189	0.00	0/0	2
WP_009893687.1	YggS family pyridoxal phosphate-dependent enzyme	YggS			0.66	0.1	23
			K.EITLLAVTK.T	1042.6638	0.6	1/1	2
			K.GLMTMAPFIEDEDEIR.G	1894.8886	0.66	1/1	2
			K.GLMTMAPFIEDEDEIR.G	1894.8886	0.67	1/1	3
			K.HGLDREEVVDFVK.E	1597.8464	0.79	1/1	3
			K.TVDVDLVNEAMR.E	1388.697	0.46	1/1	2
			R.IALCEEIQK.R	1158.6318	0.71	1/1	2
			R.VGTSIFGER.N	992.5291	0.64	1/1	2
			K.DNLSEIR.N	873.4556	0.00	0/0	2
			K.GLM(15.995)TM(15.995)APFIEDEDEIR.G	347.1879	0.00	0/0	2
			K.GLM(15.995)TMAPFIEDEDEIR.G	347.1879	0.00	0/0	2
			K.GLMTM(15.995)APFIEDEDEIR.G	579.276	0.00	0/0	2
			K.HGLDREEVVDFVK.E	1597.8464	0.00	0/0	2
			K.TVDVDLVNEAM(15.995)R.E	1232.5959	0.00	0/0	2
			K.VCMIHSLDR.I	1157.5685	0.00	1/0	2
			R.DSKEITLLAVTK.T	1400.849	0.00	0/0	3
			R.EGITSVGENKPQELAR.K	1782.9476	0.00	0/0	3
			R.IALCEEIQKR.A	1314.733	0.00	1/0	3
WP_011861888.1	D-proline reductase (dithiol) protein PrdB	D-proline			0.66	0.17	23
			K.IVPLPYEYK.A	1176.6794	0.39	1/1	2
			R.DTLEQLVAIPSAGK.I	1496.845	0.65	1/1	2
			R.DTLEQLVAIPSAGK.I	1496.845	0.65	1/1	3
			R.FNLAGDTTFR.A	1168.5877	0.76	1/1	2
			R.LHELAAEGFIK.G	1282.7285	0.68	1/1	2
			R.TAVIVQR.A	813.5072	0.91	1/1	2
			K.DINCMFPIDR.L	1307.6002	0.00	1/0	2
			K.GVAPM(15.995)HYAFMGGGGNQHVFTEETGPAIAAK.L	501.2621	0.00	0/0	4
			K.GVAPMHYAFM(15.995)GGGGNQHVFTEETGPAIAAK.L	1150.5304	0.00	0/0	3
			K.GVAPMHYAFM(15.995)GGGGNQHVFTEETGPAIAAK.L	1150.5304	0.00	0/0	4
			K.GVAPMHYAFMGGGGNQHVFTEETGPAIAAK.L	3101.4933	0.00	1/0	4
			R.AVAPLVPM(15.995)GANAGEPHNIEM(15.995)QTHILR.D	824.483	0.00	0/0	4
			R.LHELAAEGFIK.G	1282.7285	0.00	1/0	3
WP_003431170.1	guanylate kinase	guanylate			0.67	0.18	23
			K.AAIMECLEK.G	1119.5668	0.67	1/1	2
			K.LSVSATTR.K	861.492	0.95	1/1	2
			R.GTETEAEIEKR.F	1317.6776	0.74	1/1	2
			R.GTETEAEIEKR.F	1317.6776	0.48	1/1	3
			R.TGEVDGVNYFFISK.E	1630.8243	0.54	1/1	2
			K.EIEGIISSEK.N	1159.6336	0.00	1/0	2
			K.ELLKENDTIK.L	1285.7493	0.00	0/0	2
			K.GQDVLLEIEM(15.995)QGAK.Q	1173.5951	0.00	0/0	2
WP_003416187.1	5-methylthioadenosine/adenosylhomocysteine nucleosidase	5-methylthioadenosine/adenosylhomocysteine			0.68	0.23	2
			K.ASLEFYK.G	912.4957	0.84	1/1	2
			K.DIVLNMLK.S	1000.5991	0.51	1/0	2
			K.ADGSADVTYDVFVHDAANNSK.D	2252.0427	0.00	0/0	3
			K.VDAIVNTGVAGALNEK.L	1625.8988	0.00	0/0	2
WP_003428343.1	hypothetical protein	hypothetical			0.68	0.02	23
			K.AVILSSEDDCDDDCTCGGCSSCDDRE.-	3026.0658	0.7	1/1	2
			K.AVILSSEDDCDDDCTCGGCSSCDDRE.-	3026.0658	0.67	1/1	3
			K.GLAEGLEISAESK.E	1358.7293	0.68	1/1	2
			K.AVILSSEDDCDDDCTCGG.C	2015.7394	0.00	0/0	2
			K.AVILSSEDDCDDDCTCGGCSS.C	2350.8375	0.00	0/0	2
			K.HLYEEVAYLK.G	1319.7125	0.00	1/0	2
WP_003424711.1	sporulation transcription factor Spo0A	sporulation			0.7	0.05	2
			K.DGIEALDLVK.K	1127.6438	0.67	1/1	2
			K.ELYPSIAK.K	975.5641	0.7	1/1	2
			K.IIVLSAVGQDK.I	1197.7333	0.76	1/1	2
WP_003428245.1	NAD-dependent protein deacylase	NAD-dependent			0.7	0.51	23
			K.AVITQNIDGLHQMAGSK.N	1837.972	0.32	1/1	3
			K.GDYIALINK.A	1061.6121	1.38	1/1	2
			K.QFTAEQLVSHTFFVR.Y	1837.9556	0.39	1/1	3
			R.SSTGLFSQK.L	1009.5444	1.01	1/1	2
			K.AVITQNIDGLHQM(15.995)AGSK.N	1466.7552	0.00	0/0	3
			K.AVITQNIDGLHQMAGSK.N	1837.972	0.00	0/0	2
			K.LIYPNAKPNNAHIALAK.L	1932.139	0.00	1/0	4
			K.NVLELHGSVHR.N	1287.7048	0.00	0/0	2
			K.NVLELHGSVHR.N	1287.7048	0.00	1/0	3
			R.YPEEFFEFYKDK.L	1725.8371	0.00	1/0	3
WP_003436878.1	HD domain-containing protein	HD			0.7	0.22	23
			K.ENFGDEEMYR.A	1316.5343	0.7	1/1	2
			R.AILGHHDGMGVTR.T	1390.714	0.52	1/1	3
			R.FASNVNR.D	834.4348	0.96	1/1	2
			K.ENFGDEEM(15.995)YR.A	997.3699	0.00	0/0	2
			K.HCYAVEAVM(15.995)R.E	1106.4889	0.00	0/0	2
			K.HCYAVEAVMR.E	1262.59	0.00	0/0	2
			K.KENFGDEEMYR.A	1472.6606	0.00	0/0	3
			R.AILGHHDGM(15.995)GVTR.T	977.4753	0.00	0/0	3
			R.AILGHHDGMGVTR.T	1390.714	0.00	0/0	2
WP_003439345.1	deoxyribose-phosphate aldolase	deoxyribose-phosphate			0.7	0.16	23
			K.ATTTWEDIK.I	1119.5812	0.71	1/1	2
			K.FIEAGAER.L	919.4763	0.89	1/1	2
			K.ICTVIGFPLGYQTTATK.V	1926.0366	0.5	1/1	2
			K.ICTVIGFPLGYQTTATK.V	1926.0366	0.54	1/1	3
			K.ILKNEDTTDY.-	1266.6344	0.4	1/1	2
			K.TSTGMGTGGATLEDIK.L	1593.792	0.7	1/1	2
			K.TSTGMGTGGATLEDIK.L	1593.792	0.73	1/1	3
			K.TVDHTILK.A	981.5859	0.72	1/1	2
			K.M(15.995)CEIVTM(15.995)SGSDFIK.T	177.0824	0.00	0/0	2
			K.M(15.995)CEIVTMSGSDFIK.T	177.0824	0.00	0/0	2
			K.MCEIVTM(15.995)SGSDFIK.T	910.3962	0.00	0/0	2
			K.MCEIVTMSGSDFIK.T	1672.7874	0.00	0/0	2
			K.TSTGM(15.995)GTGGATLEDIK.L	523.2312	0.00	0/0	2
			K.VIIETCYLDEDEK.I	1681.8121	0.00	0/0	2
WP_009889023.1	elongation factor P	elongation			0.7	0.55	234
			-.MVSAGDFR.K	909.4378	0.8	1/1	2
			K.ENEVATIR.F	958.5084	0.83	1/1	2
			K.FLKENEVATIR.F	1374.7871	0.25	1/1	2
			K.FLKENEVATIR.F	1374.7871	0.18	1/1	3
			K.TGAIREESFNPSEK.F	1619.8155	0.7	1/1	2
			K.TGAIREESFNPSEK.F	1619.8155	0.77	1/1	3
			K.TGAIREESFNPSEKFPK.A	2021.0663	0.17	1/1	3
			K.TGAIREESFNPSEKFPK.A	2021.0663	0.2	1/1	4
			R.EESFNPSEK.F	1121.5241	2.12	1/1	2
			R.EESFNPSEKFPK.A	1521.7715	0.53	1/1	3
			R.TGEYLSR.V	852.4341	0.7	1/1	2
			-.M(15.995)VSAGDFR.K	177.0824	0.00	0/0	2
			-.M(15.995)VSAGDFRK.G	177.0824	0.00	0/0	2
			R.EESFNPSEKFPK.A	1521.7715	0.00	0/0	2
			R.TGEYLSRV.-	951.5025	0.00	0/0	2
WP_003418769.1	helix-turn-helix transcriptional regulator	helix-turn-helix			0.71	0.54	2
			K.QLTQEELANR.C	1228.6412	1.09	1/1	2
			K.VIWVSTPPSF.-	1159.6277	0.33	1/1	2
WP_003421163.1	30S ribosomal protein S3	30S			0.71	0.00	2
			R.TEGYSEGNVPLQTLR.A	1690.8526	0.71	1/1	2
			R.ADIDYGFAEADTTYGK.I	1791.8203	0.00	0/0	2
WP_009895920.1	GntR family transcriptional regulator	GntR			0.71	0.42	23
			K.KIQNGEYEANQR.I	1504.7634	0.3	1/1	3
			R.ENDLENVER.V	1144.536	1.14	1/1	2
			R.ITESEICK.S	1034.5318	0.71	1/1	2
			K.KIQNGEYEANQR.I	1504.7634	0.00	0/0	2
			K.LSNEFHDIYITK.S	1534.8031	0.00	0/0	3
			K.MLTYSNNQHIEVVK.S	1730.9025	0.00	0/0	2
WP_009903754.1	porphobilinogen synthase	porphobilinogen			0.71	0.00	2
			K.AGADMVAPSDMMDGR.I	1550.6527	0.71	1/1	2
			K.AGADM(15.995)VAPSDMMDGR.I	491.205	0.00	0/0	2
			K.AGADMVAPSDM(15.995)M(15.995)DGR.I	1091.4627	0.00	0/0	2
WP_003416528.1	uracil-DNA glycosylase	uracil-DNA			0.72	0.39	2
			K.EPINWQIENI.-	1282.6558	1.4	1/1	2
			K.FLIEEYK.T	996.5532	0.72	1/1	2
			K.GWEIFTDR.V	1050.5134	0.87	1/1	2
			K.LGKEPINWQIENI.-	1608.8875	0.44	1/1	2
			K.TPPSLLNMYK.E	1218.6682	0.48	1/1	2
			K.HYILEAPHPSPLSASK.G	1802.976	0.00	0/0	3
			R.KKVELIDTSK.H	1271.8064	0.00	1/0	3
WP_004454137.1	MBL fold metallo-hydrolase	MBL			0.72	0.02	2
			R.TDLYSGDFNQMEK.S	1602.7236	0.71	1/1	2
			R.VEDEMFTGDTLFAGSIGR.T	1972.9282	0.74	1/1	2
			K.MTFLHTPGHTQGCM(15.995)CIR.V	1644.7211	0.00	0/0	4
			K.MTFLHTPGHTQGCMCIR.V	2074.9403	0.00	0/0	4
			K.NLSYTMR.C	911.4535	0.00	1/0	2
			K.VVAHVDEKELLNDK.N	1691.9458	0.00	0/0	3
			R.TDLYSGDFNQM(15.995)EK.S	1317.5547	0.00	0/0	2
			R.VEDEM(15.995)FTGDTLFAGSIGR.T	649.2629	0.00	0/0	2
			R.VYPGHGPTSTLGVEK.K	1596.8512	0.00	0/0	3
WP_009889030.1	16S rRNA processing protein RimM	16S			0.72	0.04	2
			K.FVPTIDIDER.K	1231.6449	0.74	1/1	2
			K.VGQIVNTQGLK.G	1211.7238	0.69	1/1	2
			K.FVPTIDIDERK.M	1387.7711	0.00	1/0	3
			K.MIIDPIKGMID.-	1300.7135	0.00	0/0	2
			K.VGQIVNTQGLKGEVR.V	1652.9574	0.00	0/0	3
WP_009895750.1	cell division protein ZapA	cell			0.72	0.16	23
			K.AYDLQLK.C	905.5222	0.78	1/1	2
			K.KQEIFELSNTTEGSR.A	1793.9159	0.95	1/1	3
			R.ATIAENLASEFQNK.A	1590.8253	0.65	1/1	2
			R.ATIAENLASEFQNK.A	1590.8253	0.59	1/1	3
			K.IEELSTQLEEANER.A	1687.8265	0.00	0/0	2
			K.KQEIFELSNTTEGSR.A	1793.9159	0.00	0/0	2
			K.LTIAEKEAENR.E	1328.73	0.00	0/0	2
			K.NKIEELSTQLEEANER.A	1958.999	0.00	0/0	2
			K.NKIEELSTQLEEANER.A	1958.999	0.00	1/0	3
			K.QEIFELSNTTEGSR.A	1637.7897	0.00	0/0	2
			R.AELDAYK.N	864.4593	0.00	0/0	2
WP_009902687.1	lipoprotein	lipoprotein			0.72	0.00	2
			R.YLESIGLLTLPK.G	1401.8483	0.72	1/1	2
			K.GDTIAISNNPSSCSK.N	1605.7668	0.00	0/0	2
WP_009903755.1	precorrin-3B C(17)-methyltransferase	precorrin-3B			0.72	0.21	2
			-.MIYVVGIGPGSK.D	1275.7261	0.55	1/1	2
			K.AIEDSEAIVGYK.T	1349.7079	0.63	1/1	2
			K.DTMTLEAIK.A	1076.5788	0.8	1/1	2
			K.GGDTPVGVVK.D	983.5651	1.03	1/1	2
			K.FVCTFENM(15.995)DFEK.V	1074.4514	0.00	0/0	2
			K.FVCTFENMDFEK.V	1621.7157	0.00	0/0	2
WP_003417102.1	ATP-dependent Clp endopeptidase proteolytic subunit ClpP	ATP-dependent			0.73	0.48	23
			K.ETLNEILSER.T	1230.6456	1.11	1/1	2
			K.EYGLIDEVFTK.R	1368.7177	0.54	1/1	2
			K.IKETLNEILSER.T	1499.8559	0.3	1/1	2
			K.IKETLNEILSER.T	1499.8559	0.31	1/1	3
			K.MDTERDNFMSALEAK.E	1812.8386	0.27	1/1	3
			M.ALVPVVVEQTGR.G	1294.7609	0.74	1/1	2
			R.DNFMSALEAK.E	1180.5798	1.78	1/1	2
			R.SYDIFSR.L	914.4498	0.73	1/1	2
			R.TGQPLEK.I	827.4753	0.8	1/1	2
			-.MALVPVVVEQTGR.G	1425.8014	0.00	0/0	2
			K.EYGLIDEVFTKRP.-	1621.8716	0.00	0/0	3
			K.M(15.995)DTERDNFMSALEAK.E	177.0824	0.00	0/0	2
			K.M(15.995)DTERDNFMSALEAK.E	177.0824	0.00	0/0	3
			K.MDTERDNFM(15.995)SALEAK.E	1185.4795	0.00	0/0	2
			K.MDTERDNFM(15.995)SALEAK.E	1185.4795	0.00	0/0	3
			K.MDTERDNFMSALEAK.E	1812.8386	0.00	0/0	2
			R.DNFM(15.995)SALEAK.E	553.2206	0.00	0/0	2
WP_003436178.1	elongation factor G	elongation			0.73	0.54	2
			K.GGVEPQSENVWR.Q	1384.6735	0.7	1/1	2
			K.GILADGEEAER.H	1186.583	1.76	1/1	2
			K.GNAVLLEPYFK.V	1305.7333	1.26	1/1	2
			K.IMTDPFVGK.L	1062.5784	0.22	1/1	2
			R.ETITQPVDVEYK.Y	1476.7712	0.6	1/0	2
			R.VAPQEPGEGYK.F	1229.6292	0.76	1/1	2
			K.LAEEDPTFTVK.T	1304.6864	0.00	0/0	2
			K.TVGGSVPK.E	799.4804	0.00	1/0	2
			K.YLEGEELTIDELK.V	1606.8342	0.00	1/0	2
			R.GLIQGMEAR.S	1001.5328	0.00	0/0	2
			R.HSSDEEPFSALAFK.I	1619.7831	0.00	0/0	3
			R.IGRILQM(15.995)HANTR.E	857.5157	0.00	0/0	2
			R.QAETYGVPR.I	1047.5349	0.00	0/0	2
			R.VYSGTLESGSYVLNATK.N	1844.9601	0.00	0/0	2
WP_003430302.1	TerD family protein	TerD			0.74	0.48	23
			K.FNALGSGFEDGLAGLCK.N	1810.8924	0.51	1/1	2
			K.FNALGSGFEDGLAGLCK.N	1810.8924	0.55	1/1	3
			K.HASGAVEYMGDNR.T	1433.6358	0.75	1/1	2
			K.HASGAVEYMGDNR.T	1433.6358	0.73	1/1	3
			K.IPQNIAK.I	838.5276	0.8	1/1	2
			K.VTNDGDFIFYNNLK.H	1714.8566	0.72	1/1	2
			K.VTNDGDFIFYNNLK.H	1714.8566	0.8	1/1	3
			R.IYNEETNEELIK.Y	1549.7876	2.3	1/1	2
			R.QNFGQVENSYIR.I	1481.7263	0.92	1/1	2
			R.RQNFGQVENSYIR.I	1637.8274	0.48	1/1	2
			R.RQNFGQVENSYIR.I	1637.8274	0.57	1/1	3
			R.TGVGDGDDEQINVDLSK.I	1816.8691	0.74	1/1	2
			K.HASGAVEYM(15.995)GDNR.T	991.4433	0.00	0/0	2
			K.HASGAVEYM(15.995)GDNR.T	991.4433	0.00	0/0	3
			R.TGVGDGDDEQINVDLSK.I	1816.8691	0.00	0/0	3
WP_003431048.1	bis(5-nucleosyl)-tetraphosphatase (symmetrical) YqeK	bis(5-nucleosyl)-tetraphosphatase			0.74	0.14	23
			-.MNLENINQR.L	1158.5815	0.77	1/1	2
			K.AYLAGMIHDCAK.Y	1404.6894	0.52	1/1	3
			K.LCEIYGCDKEK.A	1497.7207	0.74	1/1	3
			K.LCEIYGCDKEK.A	1497.7207	0.00	0/0	2
			R.EDMSLLEK.I	1019.5209	0.00	0/0	2
WP_003431138.1	ribulose-phosphate 3-epimerase	ribulose-phosphate			0.74	0.24	2
			K.AGVVLNPATPVDTIK.H	1549.9079	0.72	1/1	2
			K.LAPSILSADFAK.L	1287.7438	0.35	1/1	2
			K.NASLEELV.-	901.4757	0.91	1/1	2
			R.KNASLEELV.-	1057.6019	0.76	1/1	2
WP_003437218.1	alpha/beta hydrolase	alpha/beta			0.75	0.00	2
			K.AYFISPIVNMEK.L	1466.7843	0.75	1/1	2
			K.QTNATLTVMR.N	1161.6176	0.00	0/0	2
WP_003431407.1	D-2-hydroxyacid dehydrogenase	D-2-hydroxyacid			0.78	0.28	2
			K.DGAYIVNTGR.G	1092.5564	0.81	1/1	2
			K.MNPGELTDPEINK.L	1512.7494	0.94	1/1	2
			R.AAALDTFETEGLFLNK.K	1795.9437	0.42	1/1	2
			R.SITVGVIGTGK.I	1086.6649	0.78	1/1	2
			R.WIAELLGTEVR.S	1313.7343	0.29	1/1	2
			K.DTLAIMK.D	846.4885	0.00	1/0	2
			K.EADLITLHTPLLEGTK.H	1807.0172	0.00	0/0	3
			K.M(15.995)NPGELTDPEINK.L	177.0824	0.00	0/0	2
			R.AAALDTFETEGLFLNK.K	1795.9437	0.00	1/0	3
			R.AAALDTFETEGLFLNKK.M	1952.07	0.00	0/0	2
			R.AAALDTFETEGLFLNKK.M	1952.07	0.00	1/0	3
			R.DYEEPVIKK.W	1203.6751	0.00	0/0	3
			R.GGLINTGDLIEALESGK.I	1741.9462	0.00	0/0	2
WP_009901573.1	adenylate kinase	adenylate			0.78	0.37	23
			K.GTQAAGIVEK.Y	1028.5866	0.66	1/1	2
			K.IEGVCDVCQGELYQR.A	1852.8448	1.01	1/1	2
			K.IEGVCDVCQGELYQR.A	1852.8448	1.01	1/1	3
			K.NAGISLDK.V	872.4967	0.92	1/1	2
			K.NGFMLDGFPR.N	1180.5699	0.52	1/1	2
			K.QGIIADIK.G	912.5644	1.7	1/1	2
			K.VVNIEVDK.S	970.5699	0.85	1/1	2
			K.YNIPHISTGDIFR.K	1559.8096	0.78	1/1	3
			R.ADDNEETVSKR.I	1318.6365	0.49	1/1	3
			R.IILLGPPGAGK.G	1090.7114	0.45	1/1	2
			R.NVAQGEHLDIFLK.N	1538.8457	0.39	1/1	3
			K.NIKEGTELGK.K	1171.6812	0.00	1/0	2
			K.NIKEGTELGKK.A	1327.8075	0.00	1/0	3
			K.QGIIADIKGDQAIDK.V	1667.9458	0.00	0/0	3
			K.SCGATYHVEFNPPK.I	1661.7872	0.00	0/0	2
			K.SCGATYHVEFNPPK.I	1661.7872	0.00	0/0	3
			K.VFEDIVAALGSGK.-	1360.7602	0.00	1/0	2
			K.YNIPHISTGDIFR.K	1559.8096	0.00	0/0	2
			K.YNIPHISTGDIFRK.N	1715.9359	0.00	0/0	4
			R.ADDNEETVSK.R	1162.5354	0.00	1/0	2
			R.IQVYLDETKPLVDYYSK.Q	2158.1643	0.00	1/0	3
			R.ISQEDCKNGFMLDGFPR.N	2069.9744	0.00	0/0	3
WP_003419857.1	Fis family transcriptional regulator	Fis			0.79	0.00	2
			K.IGETISEK.S	931.5226	0.79	1/1	2
			K.ELADICTPVK.M	1200.6424	0.00	0/0	2
			R.SMSDLISFK.L	1082.5682	0.00	0/0	2
WP_003422104.1	D-proline reductase (dithiol) proprotein PrdA	D-proline			0.79	0.2	23
			K.IVLEENEQSLPMSK.K	1671.8753	0.61	1/1	2
			K.IVLEENEQSLPMSK.K	1671.8753	0.66	1/1	3
			K.LNNIEAIEK.V	1098.6285	0.89	1/0	2
			K.NAIEGVEVK.A	1013.5757	1.18	1/1	2
			K.QGIENEILSNNTLAPEDAVR.I	2211.1213	0.79	1/1	2
			K.QGIENEILSNNTLAPEDAVR.I	2211.1213	0.82	1/1	3
			K.SKQGIENEILSNNTLAPEDAVR.I	2454.2795	0.61	1/0	3
			K.EEGELGSGITR.V	1174.583	0.00	0/0	2
			K.IVLEENEQSLPM(15.995)SK.K	1428.717	0.00	0/0	2
			K.IVLEENEQSLPM(15.995)SK.K	1428.717	0.00	0/0	3
			K.YM(15.995)THM(15.995)VDNNK.S	340.1457	0.00	0/0	3
			K.YM(15.995)THMVDNNK.S	340.1457	0.00	0/0	2
			K.YM(15.995)THMVDNNK.S	340.1457	0.00	0/0	3
			K.YMTHM(15.995)VDNNK.S	709.2928	0.00	0/0	2
			K.YMTHM(15.995)VDNNK.S	709.2928	0.00	0/0	3
			K.YMTHMVDNNK.S	1307.6002	0.00	1/0	2
			K.YMTHMVDNNK.S	1307.6002	0.00	1/0	3
			M.SITLETAQAHANDPAVCCCR.F	2302.0334	0.00	0/0	3
			R.HYWREPLVIR.A	1395.7775	0.00	0/0	3
WP_003424455.1	response regulator transcription factor	response			0.79	0.44	2
			K.GIGYTLEKDI.-	1163.6438	0.48	1/1	2
			K.RVEAILR.R	883.5603	1.1	1/1	2
			K.FIVFEK.L	837.5	0.00	1/0	2
			K.GIGYTLEK.D	935.5328	0.00	1/0	2
			K.TINDKFIVFEK.L	1436.8279	0.00	1/0	3
WP_003430074.1	TerD family protein	TerD			0.79	0.3	2
			K.DGSWQFK.A	922.4549	1	1/1	2
			K.TTLIVGAIYR.K	1133.6808	0.58	1/1	2
			K.DLIYFGNLK.S	1137.6434	0.00	1/0	2
			K.EVM(15.995)QNLDR.I	405.1934	0.00	0/0	2
			K.TTLIVGAIYRK.D	1289.8071	0.00	0/0	3
			K.YNLSDNYSEK.T	1287.5983	0.00	0/0	2
WP_003435129.1	lactate utilization protein	lactate			0.79	0.35	23
			-.MDQNLNWLNEK.R	1459.713	0.69	1/1	2
			K.GYLVSNKEELLK.K	1475.8599	0.68	1/1	3
			K.SLENNNMK.G	1004.4961	1	1/1	2
			K.TIAAPANCK.R	1000.5376	1.66	1/0	2
			K.TIAAPANCKR.L	1156.6387	0.43	1/1	2
			K.VIVIAGVNK.I	967.643	0.79	1/1	2
			K.YNFLDR.Y	854.4287	1.1	1/1	2
			R.ICCSYTLIK.R	1212.6247	0.69	1/1	2
			R.VAAMIYGPDK.V	1119.5998	0.93	1/1	2
			-.M(15.995)DQNLNWLNEK.R	177.0824	0.00	0/0	2
			K.DVDEAIKR.T	1000.5553	0.00	1/0	2
			K.GYLVSNKEELLK.K	1475.8599	0.00	0/0	2
			K.IVKDVDEAIKR.T	1368.8341	0.00	0/0	2
			K.TTGICIDCSSPGR.I	1450.6545	0.00	1/0	2
			R.VAAM(15.995)IYGPDK.V	418.225	0.00	0/0	2
WP_003435254.1	CoA pyrophosphatase	CoA			0.79	0.00	2
			K.IESGETPYEAVIR.E	1490.7617	0.79	1/1	2
			K.YLLENPPNTYSNTVK.V	1808.939	0.00	0/0	2
WP_009902078.1	methyltransferase domain-containing protein	methyltransferase			0.79	0.00	2
			K.GISSIFLAK.E	990.6114	0.79	1/1	2
WP_003423115.1	fructose-6-phosphate aldolase	fructose-6-phosphate			0.8	0.61	23
			K.DWEGASLKL.-	1073.5757	1.35	1/1	2
			K.EANDLGVICGVTTNPSLIAK.E	2128.1279	1.56	1/1	3
			K.EGRDFIEVVK.E	1246.6921	0.4	1/1	3
			K.GMIEEAEK.L	961.479	0.83	1/1	2
			K.IPMTAEGLK.A	1014.5784	0.78	1/1	2
			R.AGATYVSPFVGR.L	1251.6612	0.66	1/1	2
			R.FFIDTANIEEIK.E	1494.797	2.21	1/1	2
			R.MGADIATVPLK.V	1170.6682	0.62	1/1	2
			K.DWEGASLK.L	960.4916	0.00	1/0	2
			K.EANDLGVICGVTTNPSLIAK.E	2128.1279	0.00	0/0	2
			K.EISEIVDGPISAEVISLEHK.G	2221.1923	0.00	0/0	3
			K.GM(15.995)IEEAEK.L	234.1038	0.00	0/0	2
			K.GMIEEAEKLSK.I	1317.7214	0.00	0/0	2
			K.GMIEEAEKLSK.I	1317.7214	0.00	0/0	3
			K.IPM(15.995)TAEGLK.A	387.2192	0.00	0/0	2
			K.TNVTLIFSAGQALLAAR.A	1773.0149	0.00	0/0	2
			R.DFIEVVK.E	904.527	0.00	1/0	2
			R.M(15.995)GADIATVPLK.V	177.0824	0.00	0/0	2
			R.NPIHVLQAAR.M	1145.6669	0.00	0/0	2
WP_003425980.1	type III pantothenate kinase	type			0.8	0.6	23
			K.GEYLGGTIAPGIK.I	1330.7497	2.06	1/1	2
			K.ISSEALFQSASK.L	1322.7082	0.8	1/1	2
			K.KQPLIVGPGIK.T	1232.822	0.86	1/1	3
			R.IVNAVAGIEK.Y	1068.6543	0.76	1/1	2
			R.VELAKPGMTICK.S	1429.8037	0.58	1/1	3
			K.ELNCDDVK.V	1047.4907	0.00	1/0	2
			K.GDKLVNYWR.I	1205.6557	0.00	0/0	3
			K.KELNCDDVK.V	1203.6169	0.00	1/0	2
			K.VIATGGLAK.L	884.5695	0.00	0/0	2
WP_003430598.1	ribosome recycling factor	ribosome			0.8	0.39	23
			K.AIANSDLGLNPSNDGEVIR.L	1983.0102	0.74	1/1	2
			K.AIANSDLGLNPSNDGEVIR.L	1983.0102	0.74	1/1	3
			K.EIDTLLSK.K	973.5696	1.5	1/0	2
			K.FEFGTIR.A	896.4756	1.5	1/1	2
			K.GGELTEDELK.K	1145.5816	1.15	1/1	2
			K.GGELTEDELKK.A	1301.7079	0.85	1/1	2
			K.GGELTEDELKK.A	1301.7079	0.85	1/1	3
			R.ILMISPWDK.S	1157.6519	0.38	1/1	2
			R.VDYYGTPTPINQIGAISVPEPR.I	2415.2515	0.55	1/1	2
			R.VDYYGTPTPINQIGAISVPEPR.I	2415.2515	0.57	1/1	3
			K.AAEEFKVR.I	1004.5655	0.00	1/0	2
			K.EIDTLLSKK.E	1129.6958	0.00	0/0	2
			K.EKDIMEV.-	918.4732	0.00	1/0	2
			K.MNGTIDALK.F	1017.5529	0.00	0/0	2
			K.SAM(15.995)HEIEK.A	335.1515	0.00	0/0	2
			K.SAMHEIEK.A	999.5059	0.00	1/0	2
			R.ANAQM(15.995)LDK.I	561.2581	0.00	0/0	2
			R.ANAQMLDK.I	945.4954	0.00	1/0	2
			R.ANAQMLDKIR.V	1214.6805	0.00	0/0	3
			R.ILM(15.995)ISPWDK.S	403.2505	0.00	0/0	2
			R.LSVPALTEER.R	1141.6343	0.00	1/0	2
WP_004454472.1	response regulator transcription factor	response			0.8	0.6	2
			K.SLYLDTLEK.R	1136.6329	1.22	1/1	2
			R.INNIDTPVLILTAK.E	1579.9549	0.37	1/1	2
			K.SLYLDTLEKR.V	1292.734	0.00	0/0	3
WP_003418888.1	acyl-CoA dehydrogenase	acyl-CoA			0.81	0.2	23
			K.GISAFIVEK.G	1018.6063	0.73	1/0	2
			K.GTPGFSFGVK.E	1051.5702	0.71	1/1	2
			K.ITEIYEGTSEVQR.M	1551.7781	0.81	1/1	2
			K.ITEIYEGTSEVQR.M	1551.7781	0.89	1/1	3
			R.GSATSELIFEDCR.I	1511.6926	1.21	1/1	2
			K.FQNTQFQLADMEVK.V	1753.8709	0.00	1/0	2
			K.LFAAETAMEVTTK.A	1466.7691	0.00	0/0	2
WP_003420839.1	redox-sensing transcriptional repressor Rex	redox-sensing			0.82	0.35	23
			K.ALFDANPR.M	930.4923	0.95	1/1	2
			K.ELSDIIGFTASQIR.Q	1576.8461	0.56	1/1	2
			K.ELSDIIGFTASQIR.Q	1576.8461	0.56	1/1	3
			K.GVWNFAPLDLEVPK.G	1639.8974	0.47	1/1	2
			K.NGAQEVINR.V	1027.5411	1.05	1/1	2
			K.NISMAVIR.R	930.5321	0.82	1/1	2
			K.NNNIDIAVLCIPK.N	1538.8491	1.33	1/1	2
			K.NNNIDIAVLCIPK.N	1538.8491	1.26	1/1	3
			R.YLGDLLDRDIQR.I	1503.8045	0.35	1/1	2
			K.NISM(15.995)AVIR.R	491.2414	0.00	0/0	2
			R.QDLNNFGGFGQQGYGYNVEALHTEIGK.I	3012.4447	0.00	0/0	3
			R.YLGDLLDR.D	991.5338	0.00	1/0	2
WP_003424103.1	coenzyme F420-0:L-glutamate ligase	coenzyme			0.82	0.1	2
			K.IVVDSVLNASK.S	1199.7125	0.89	1/1	2
			K.IWELADPVVSPAYTK.G	1744.9481	0.75	1/1	2
			K.HTFTGVDYVDYYK.N	1662.793	0.00	0/0	2
			K.SDDLTGNMVSQGTTPR.R	1705.7941	0.00	0/0	2
			K.SENFEVR.D	907.4399	0.00	1/0	2
			K.YLADNDFADLSGDELK.E	1840.8731	0.00	0/0	2
			R.AQGNYAHVDNIAK.D	1455.747	0.00	1/0	2
			R.DKDVIAVTEAVVAR.A	1540.8825	0.00	0/0	3
WP_009887863.1	elongation factor Tu	elongation			0.82	0.3	234
			K.LLDQAQAGDNIGALLR.G	1694.9315	0.82	1/1	2
			K.LLDQAQAGDNIGALLR.G	1694.9315	0.73	1/1	3
			K.TTLTAAITK.T	974.6012	0.87	1/1	2
			K.VQDEVELVGLTEAPR.K	1681.8887	1.2	1/1	2
			K.VQDEVELVGLTEAPR.K	1681.8887	1.11	1/1	3
			R.DLLTEYDFPGDDTPIVR.G	1993.9714	0.77	1/1	2
			R.EHILLSR.Q	894.5287	0.71	1/1	2
			R.HYAHVDCPGHADYVK.N	1824.8447	0.56	1/1	4
			R.TVASGVVATIIE.-	1186.6809	0.83	1/1	2
			R.YQLGEAVDFANIDKAPEER.E	2221.1096	1.58	1/1	3
			R.GITISTAHVEYETPNR.H	1814.9163	0.00	1/0	2
			R.GITISTAHVEYETPNR.H	1814.9163	0.00	0/0	3
			R.GSALM(15.995)ALEDPK.S	505.257	0.00	0/0	2
			R.HYAHVDCPGHADYVK.N	1824.8447	0.00	0/0	2
			R.HYAHVDCPGHADYVK.N	1824.8447	0.00	1/0	3
			R.TTDVTGACK.L	1007.4958	0.00	1/0	2
			R.YQLGEAVDFANIDK.A	1637.8301	0.00	0/0	2
WP_009889331.1	helix-turn-helix transcriptional regulator	helix-turn-helix			0.86	0.15	2
			K.ILVVSIPNPFEK.S	1410.8486	0.73	1/1	2
			R.GLTSVATDSLGK.I	1203.6711	1.03	1/1	2
			R.LIEILPSK.S	967.6318	0.86	1/1	2
WP_003428415.1	transcription antitermination factor NusB	transcription			0.88	0.34	2
			K.DNSEHIINR.Y	1124.5574	1.12	1/1	2
			K.VDVSILR.L	828.5069	0.64	1/1	2
			K.ELALQYSK.N	1006.5699	0.00	1/0	2
WP_003426952.1	TetR/AcrR family transcriptional regulator	TetR/AcrR			0.89	0.00	2
			K.VADMAGYNSSTLYK.Y	1574.7651	0.89	1/1	2
WP_003429132.1	6-phosphofructokinase	6-phosphofructokinase			0.9	0.00	2
			K.TIGLLTSGGDAPGMNAAIR.A	1841.9669	0.9	1/1	2
			K.TIGLLTSGGDAPGM(15.995)NAAIR.A	1316.6646	0.00	0/0	2
WP_003436174.1	DNA-directed RNA polymerase subunit beta	DNA-directed			0.9	0.16	2
			K.GENIPEPGIPESFK.V	1568.8086	0.78	1/1	2
			K.VLTDEDQEIEVR.E	1472.7359	1.01	1/1	2
WP_032507408.1	diphthine--ammonia ligase	diphthine--ammonia			0.9	0.44	2
			K.DGYGYLEIK.-	1112.5754	0.78	1/1	2
			K.DSILALNR.M	928.5342	1.02	1/1	2
			K.HLGEEFLGK.K	1084.5917	0.63	1/0	2
			K.VDLPLWQESR.E	1269.6717	1.63	1/1	2
			K.FVMSFSGGK.D	1014.5208	0.00	0/0	2
			K.NAGADPCGEHGEYHTFVVDGPIFK.K	2673.2363	0.00	0/0	4
WP_003438030.1	nitroreductase family protein	nitroreductase			0.92	0.00	2
			K.SDMQVVTDK.G	1077.5376	0.92	1/1	2
			K.IVGYCNI.-	865.4368	0.00	0/0	2
			K.SDM(15.995)QVVTDK.G	379.1413	0.00	0/0	2
			K.SDMQVVTDKGSTR.L	1478.7399	0.00	0/0	3
			R.SEVFNNLDK.V	1120.5764	0.00	0/0	2
WP_009893498.1	GNAT family N-acetyltransferase	GNAT			0.93	0.23	2
			K.ALLLDER.K	856.5018	1.09	1/1	2
			R.MDDLDTIAK.F	1076.5424	0.77	1/1	2
			K.YHVYTVFDK.V	1226.6336	0.00	0/0	3
WP_003428430.1	GNAT family N-acetyltransferase	GNAT			0.94	0.52	23
			K.EKYWGIGLGK.R	1233.7121	0.58	1/1	3
			K.ISLEEQENAIESAK.A	1615.8305	1.31	1/1	2
			K.NGVDVLIR.E	912.5393	0.00	1/0	2
			K.YWGIGLGK.R	948.5433	0.00	0/0	2
WP_004454389.1	2-hydroxyglutaryl-CoA dehydratase	2-hydroxyglutaryl-CoA			0.94	6.38	23
			-.MFSIGVDSGSVATK.G	1453.7487	0.75	1/1	2
			K.GVLFDGEK.I	919.5015	1.16	1/1	2
			K.IIIPTGWSPK.S	1166.7063	0.62	1/1	2
			K.KVTEITCHTR.G	1299.6969	0.94	1/1	3
			K.QVYELLSSEIDKK.D	1634.9131	0.65	1/1	3
			K.STSMLAR.G	792.4164	20	0/0	2
			K.VVGTGYGR.G	835.4552	0.98	1/1	2
			R.GIYFLNK.N	909.5324	0.92	1/1	2
			R.GVMDFADK.K	937.4579	1.03	1/1	2
			-.M(15.995)FSIGVDSGSVATK.G	177.0824	0.00	0/0	2
			K.KIIIPTGWSPK.S	1322.8326	0.00	0/0	3
			K.KVTEITCHTR.G	1299.6969	0.00	1/0	2
			K.MIEEILGK.K	987.5675	0.00	1/0	2
			K.QVYELLSSEIDKK.D	1634.9131	0.00	0/0	2
			R.DGNVFNFIM(15.995)NDK.C	1083.5059	0.00	0/0	2
			R.DGNVFNFIMNDK.C	1468.7021	0.00	1/0	2
			R.GEVIDEVAFTGGLAK.S	1560.8399	0.00	1/0	2
			R.TILDVGGQDSK.V	1187.6398	0.00	0/0	2
WP_009896932.1	response regulator transcription factor	response			0.94	0.45	2
			K.EIELTPTEFSIVK.Y	1560.8651	1.26	1/1	2
			R.EGYEIVEAGTGR.E	1307.6357	0.62	1/1	2
			K.SSEIVSPPFILDIDK.R	1714.9393	0.00	0/0	2
			K.SSEIVSPPFILDIDKR.K	1872.0438	0.00	1/0	3
			R.NKIEDDPSKPK.Y	1381.7817	0.00	0/0	2
WP_009898301.1	phosphopyruvate hydratase	phosphopyruvate			0.94	9.55	23
			C.GVGDEGGFAPNLGSNR.E	1573.7485	20	0/0	2
			K.LQLVGDDLFVTNTER.L	1746.9152	0.96	1/1	2
			K.RAGYTAVISHR.S	1257.6942	0.82	1/1	3
			R.AIVPSGASTGAFEAVELR.D	1801.9574	0.92	1/1	2
			G.LACGVGDEGGFAPNLGSNR.E	1918.9037	0.00	0/0	2
			K.GIENGVANSILVK.V	1368.7977	0.00	1/0	2
			K.GLACGVGDEGGFAPNLGSNR.E	1975.9251	0.00	1/0	2
			R.AGYTAVISHR.S	1101.5931	0.00	0/0	2
			R.IEEM(15.995)VGEQAR.Y	548.2516	0.00	0/0	2
			R.IEEMVGEQAR.Y	1188.5809	0.00	1/0	2
WP_009898446.1	pyrroline-5-carboxylate reductase	pyrroline-5-carboxylate			0.95	0.57	23
			K.AEDITVSDLSQVALDK.V	1758.9251	0.54	1/1	2
			K.DMVCSPAGTTIEAVK.V	1633.8055	2.24	1/1	2
			K.FASQAVMGSAK.M	1151.6009	0.95	1/1	2
			K.NSNVTDEELNMIK.A	1561.7658	0.9	1/1	2
			K.TIESLESFIGSDK.K	1480.7661	1.27	1/1	2
			K.TIESLESFIGSDKK.I	1636.8924	0.59	1/1	3
			K.VKEEFGVNTTTDSK.V	1637.8512	1.2	1/1	3
			K.DM(15.995)VCSPAGTTIEAVK.V	292.1093	0.00	0/0	2
			K.FASQAVM(15.995)GSAK.M	780.384	0.00	0/0	2
			K.IIVSIAAGK.T	926.6165	0.00	0/0	2
			K.MVLETGK.H	832.4728	0.00	1/0	2
			K.NSNVTDEELNM(15.995)IK.A	1292.5555	0.00	0/0	2
			K.TIESLESFIGSDKK.I	1636.8924	0.00	0/0	2
			K.VKEEFGVNTTTDSK.V	1637.8512	0.00	1/0	2
			R.VM(15.995)PNTPALVGEGMSALCK.N	276.1508	0.00	0/0	2
			R.VMPNTPALVGEGMSALCK.N	1930.976	0.00	1/0	2
WP_003416871.1	glycine/sarcosine/betaine reductase component B subunit	glycine/sarcosine/betaine			0.96	1.06	23
			K.AAMYLGEVAR.N	1107.5747	0.7	1/1	2
			K.DGVLFINK.Q	960.5644	3.3	1/1	2
			K.DIQFGDVTEVK.D	1305.6816	3.31	1/0	2
			K.EYPELPK.V	930.5062	3.14	1/1	2
			K.GVAVVTTGK.I	886.5488	1.02	1/1	2
			K.IVGFQEGIIDMTGEGAK.Y	1819.939	0.55	1/1	2
			K.IVGFQEGIIDMTGEGAK.Y	1819.939	0.55	1/1	3
			K.LNNVVVIAEPIDGLK.Q	1648.9764	0.64	1/1	2
			K.LNNVVVIAEPIDGLK.Q	1648.9764	0.58	1/1	3
			K.QEMLQEIGGDEHIK.S	1681.8345	1.72	1/1	3
			K.TVIVTDEYAGR.D	1250.6507	0.92	1/1	2
			R.ADAVVTGGNANQVVVLPK.L	1807.0204	1	1/1	2
			R.DGGSQSLADADVR.A	1317.6161	1.53	1/1	2
			R.ITPVKDVIEPR.V	1321.7969	0.65	1/1	3
			K.IEMQGVK.T	859.4837	0.00	1/0	2
			K.IVGFQEGIIDM(15.995)TGEGAK.Y	1248.6424	0.00	0/0	2
			K.IVGFQEGIIDM(15.995)TGEGAK.Y	1248.6424	0.00	0/0	3
			K.NPSYVHINNGVVEDLYAR.H	2088.047	0.00	0/0	3
			K.QEM(15.995)LQEIGGDEHIK.S	434.1835	0.00	0/0	3
			K.QEMLQEIGGDEHIK.S	1681.8345	0.00	0/0	2
			K.VEGNGGIFPGIMSK.V	1460.7697	0.00	0/0	2
			K.VIGHLEVVDVIAGGSDGSLR.A	2021.0987	0.00	0/0	3
			R.ADAVVTGGNANQVVVLPK.L	1807.0204	0.00	0/0	3
			R.ITPVKDVIEPR.V	1321.7969	0.00	0/0	2
			R.NLTPDEVSVYETKPLLESIK.E	2359.2968	0.00	0/0	3
			R.VKVEGNGGIFPGIMSK.V	1715.9644	0.00	0/0	2
			R.VKVEGNGGIFPGIMSK.V	1715.9644	0.00	1/0	3
WP_004454870.1	hypothetical protein	hypothetical			0.96	0.47	23
			K.QDATNIVEQAK.K	1271.6721	1.29	1/1	2
			R.IQQEYQDNIEELKK.N	1861.9867	0.62	1/1	3
			K.QDATNIVEQAKK.E	1427.7984	0.00	0/0	3
			R.IQQEYQDNIEELKK.N	1861.9867	0.00	0/0	2
WP_009903738.1	pyruvate kinase	pyruvate			0.97	0.00	2
			K.SPIIATTNNEK.T	1242.682	0.97	1/1	2
			K.DGEVVTVDASR.G	1174.583	0.00	0/0	2
			K.IENQEGVENLDEILK.V	1797.936	0.00	1/0	2
			K.SSVAGNTDEVIEK.A	1403.7144	0.00	1/0	2
			R.TGNFEDPEVFLEEGQK.F	1894.903	0.00	1/0	2
			R.TGNFEDPEVFLEEGQK.F	1894.903	0.00	0/0	3
WP_003421155.1	50S ribosomal protein L14	50S			0.98	0.29	2
			K.ELLCIR.V	830.4684	1.19	1/1	2
			K.IVSLAPEVL.-	967.5954	0.78	1/1	2
WP_003424537.1	30S ribosomal protein S2	30S			0.99	0.26	23
			K.EVAETGKPILFVGTK.K	1671.9811	0.84	1/1	3
			K.MEEEGVFNVLPK.K	1446.7429	1.41	1/1	2
			K.QAQDAIKDEAER.C	1428.7209	1.08	1/1	2
			K.QAQDAIKDEAER.C	1428.7209	0.99	1/1	3
			R.KENIAIQEAHR.L	1363.7572	0.73	1/1	3
			K.DMPELPGAMFVVDPR.K	1700.8266	0.00	0/0	2
			K.EVAETGKPILFVGTK.K	1671.9811	0.00	0/0	2
			K.LITGAMATAVIEGR.Q	1429.7963	0.00	1/0	2
			K.QLLEAGVHFGHQTR.R	1619.8532	0.00	0/0	4
			R.CGM(15.995)YFVNER.W	394.1345	0.00	0/0	2
			R.CGMYFVNER.W	1202.5213	0.00	1/0	2
			R.NGIYIIDLQK.T	1231.7176	0.00	0/0	2
			R.QGAEEEVAEDQE.-	1360.563	0.00	1/0	2
			R.WLGGMLTNHK.T	1211.6485	0.00	0/0	3
WP_009902140.1	nitroreductase	nitroreductase			1	0.06	23
			-.MNNNFQDNQTINLIQSR.R	2078.0044	0.96	1/1	2
			-.MNNNFQDNQTINLIQSR.R	2078.0044	1.04	1/1	3
			-.M(15.995)NNNFQDNQTINLIQSR.R	177.0824	0.00	0/0	2
			-.M(15.995)NNNFQDNQTINLIQSR.R	177.0824	0.00	0/0	3
			K.QPWHITVVQDQK.L	1533.8304	0.00	0/0	2
			K.QPWHITVVQDQK.L	1533.8304	0.00	1/0	3
			R.IHEVSNVEINK.N	1336.7351	0.00	0/0	2
			R.IHEVSNVEINK.N	1336.7351	0.00	1/0	3
WP_003421168.1	50S ribosomal protein L2	50S			1.01	0.52	23
			K.VATIEYDPNR.T	1204.6088	1.37	1/1	2
			R.TANIALLNYADGEKR.Y	1703.9206	0.64	1/0	3
			K.ATIGQVGNIEHGNVVIGK.A	1862.0455	0.00	0/0	3
			R.GSVM(15.995)NPNDHPHGGGEGR.S	420.2043	0.00	0/0	4
			R.GSVMNPNDHPHGGGEGR.S	1744.77	0.00	0/0	3
			R.SAGVSAQLM(15.995)AK.E	890.4532	0.00	0/0	2
WP_009891957.1	cobalt-precorrin-4 methyltransferase	cobalt-precorrin-4			1.04	0.12	2
			K.DTPIAVIYK.A	1074.6325	1.01	1/1	2
			K.GTLSDIAVK.V	958.5699	1.21	1/1	2
			K.LLEGGYPK.D	931.5379	1.07	1/1	2
			R.FLGEEYNNSK.L	1255.6085	0.92	1/1	2
WP_009897956.1	cell wall-binding protein Cwp2	cell			1.04	0.46	2
			K.IYIVGGESAVSNTAK.K	1563.8508	0.72	1/1	2
			K.VIETYYGK.L	1027.559	1.37	1/0	2
			K.APIIVNGWNDLSADAIK.L	1853.0128	0.00	0/0	2
			K.ATELTVESTNEK.D	1376.7035	0.00	0/0	2
			K.DAFVVGAK.G	861.496	0.00	0/0	2
			K.GEADAM(15.995)SIAAK.A	620.2476	0.00	0/0	2
			K.GEADAMSIAAK.A	1118.5642	0.00	1/0	2
			K.LVDGLAATPLAQSK.K	1438.8395	0.00	0/0	2
			K.NSDLNTVSPQDLYDGYR.L	1984.9208	0.00	0/0	2
			K.TDITDSQK.N	962.492	0.00	1/0	2
			K.YTDNIVIVNSNK.L	1434.7718	0.00	0/0	2
			K.YTGGSQVGQPIYEIK.V	1694.8879	0.00	0/0	2
			R.HMTSVAVAK.A	998.5583	0.00	1/0	2
			R.LAGDDRHMTSVAVAK.A	1625.8559	0.00	0/0	4
WP_003420710.1	MFS transporter	MFS			1.05	0.27	2345
			K.KTEGLQDTQTHYCPGCTHGIIHR.L	2765.3207	0.75	1/1	5
			K.TEGLQDTQTHYCPGCTHGIIHR.L	2609.1945	0.73	1/1	4
			K.TEGLQDTQTHYCPGCTHGIIHR.L	2609.1945	0.77	1/1	5
			K.YFNCDTQEAAHGR.A	1595.6787	1.05	1/1	2
			K.YFNCDTQEAAHGR.A	1595.6787	1.07	1/1	3
			R.APAAATGIK.R	854.5226	1.25	1/1	2
			R.DNMIPYYPLGNFK.N	1626.8116	0.6	1/1	2
			R.NAETQGYPIR.V	1175.5935	1.38	1/1	2
			R.VAVDTPAHVR.Q	1091.6087	1.14	1/1	2
			K.ITTIFVNNTTYGM(15.995)TGGQM(15.995)APTTLVGQR.A	1501.7487	0.00	0/0	3
			K.KTEGLQDTQTHYCPGCTHGIIHR.L	2765.3207	0.00	0/0	4
			K.NVEVEEVK.-	1000.5441	0.00	1/0	2
			K.TEGLQDTQTHYCPGCTHGIIHR.L	2609.1945	0.00	0/0	3
			R.DNM(15.995)IPYYPLGNFK.N	406.1522	0.00	0/0	2
			R.DNMIPYYPLGNFK.N	1626.8116	0.00	1/0	3
WP_004454633.1	xanthine phosphoribosyltransferase	xanthine			1.05	0.24	23
			K.GENILIVDDFLANGR.A	1672.8784	0.89	1/1	2
			K.GFQAGGALLK.A	1016.6019	1.19	1/1	2
			K.NLDKDVYETNVYSFTK.A	2020.0234	1.05	1/1	3
			R.EGSVSGNDILK.V	1173.6241	1.49	1/1	2
			R.LESLAVVESIDNGTVK.F	1728.9509	0.96	1/1	2
			K.ANDVRLESLAVVESIDNGTVK.F	2285.2308	0.00	0/0	3
			K.NLDKDVYETNVYSFTK.A	2020.0234	0.00	0/0	2
			R.LESLAVVESIDNGTVK.F	1728.9509	0.00	0/0	3
WP_009902783.1	histidine phosphatase family protein	histidine			1.06	0.08	23
			K.ELSEDIGK.Y	945.5019	1.01	1/1	2
			R.NEPHLVNIPEGETLK.I	1744.936	1.12	1/1	3
			K.DYGPVIVK.M	945.5535	0.00	1/0	2
			K.EIQKDYSDIYATWR.N	1843.9186	0.00	0/0	3
			K.TQGHGNSDLTPQGIEQAK.E	1936.9684	0.00	1/0	3
			R.HGQTDWNILGK.T	1323.6935	0.00	0/0	2
			R.NEPHLVNIPEGETLK.I	1744.936	0.00	0/0	2
WP_003428191.1	pyridoxamine kinase	pyridoxamine			1.13	0.39	23
			K.HSDLTTPNLTEACFLTGNDYTK.S	2554.2091	1.13	1/1	3
			K.SDYNRDELIYIAK.S	1654.8566	1.63	1/1	3
			K.VNFDSIYSGFLGSK.H	1588.8137	0.87	1/1	2
WP_009898069.1	bifunctional acetaldehyde-CoA/alcohol dehydrogenase	bifunctional			1.14	0.52	2
			K.AVTDLLDEMNIK.H	1416.7534	0.66	1/1	2
			K.ETGMGIAEDK.V	1105.5325	1.52	1/1	2
			K.IFATYSQEQVDK.I	1483.7559	2.07	1/1	2
			K.IVGQTACTIAK.L	1216.6849	0.94	1/1	2
			K.LAGFEVPVDTK.V	1230.686	1.33	1/1	2
			K.SIFEYLPR.A	1051.5702	0.84	1/1	2
			K.AVTDLLDEM(15.995)NIK.H	1033.5002	0.00	0/0	2
			K.DM(15.995)YLNSYYGR.-	292.1093	0.00	0/0	2
			K.EFGVEESK.F	979.4862	0.00	0/0	2
			K.EQVIIENK.K	1027.5914	0.00	0/0	2
			K.EQVIIENKK.E	1183.7176	0.00	0/0	2
			K.ETGM(15.995)GIAEDK.V	464.1941	0.00	0/0	2
			K.EVDLTLATGGPGM(15.995)VK.S	1287.6381	0.00	0/0	2
			K.HTTFFEVEPDPTLECAK.I	2076.9908	0.00	0/0	2
			K.HTTFFEVEPDPTLECAK.I	2076.9908	0.00	0/0	3
			K.IAEPIGVIAAVVPTTNPTSTAIFK.A	2466.4179	0.00	0/0	3
			K.LVEDGGFGHTSSLYIDDVNQR.E	2350.1271	0.00	1/0	3
			K.NHYASEYIYNAYK.E	1690.7991	0.00	0/0	3
			K.QRVPLAIMAQK.E	1309.7904	0.00	0/0	3
			K.TAVNSILVSK.T	1086.6649	0.00	1/0	2
			K.TCGVIEKDEAFGMTK.I	1768.874	0.00	1/0	3
			R.ILINTPSSQGGIGDLYNFK.L	2093.1238	0.00	0/0	2
			R.ILINTPSSQGGIGDLYNFK.L	2093.1238	0.00	0/0	3
			R.NGIIFSPHPR.A	1164.6404	0.00	0/0	2
WP_003426928.1	DivIVA domain-containing protein	DivIVA			1.15	0.24	23
			-.MLTPIEIENK.E	1242.6894	1.57	1/1	2
			K.ATLITAQSAAEDTCSAANK.K	1978.9711	1.19	1/1	2
			K.ATLITAQSAAEDTCSAANK.K	1978.9711	1.14	1/1	3
			K.ATLITAQSAAEDTCSAANKK.A	2135.0973	0.76	1/1	3
			K.IIVEEADLK.A	1084.638	0.96	1/1	2
			K.SLLEDEIR.S	1001.5393	1.29	1/1	2
			R.QIIEQANNR.V	1112.5938	1.1	1/1	2
			R.SVDEIFYDVDEK.C	1513.7188	1.15	1/1	2
			-.M(15.995)LTPIEIENK.E	177.0824	0.00	0/0	2
			K.YENIEETLK.A	1193.618	0.00	0/0	2
WP_003432442.1	3-methyl-2-oxobutanoate dehydrogenase subunit VorB	3-methyl-2-oxobutanoate			1.15	0.00	2
			K.IIAGELVAGGAR.-	1153.6819	1.15	1/1	2
			K.NEVQYEMYK.T	1258.5904	0.00	0/0	2
			K.SAIDILR.E	814.4913	0.00	1/0	2
			R.GGPGLGSIQPSQADYFM(15.995)STR.G	1751.8189	0.00	0/0	2
			R.GGPGLGSIQPSQADYFMSTR.G	2097.0031	0.00	0/0	2
			R.GGPGLGSIQPSQADYFMSTR.G	2097.0031	0.00	1/0	3
			R.VMTSSSSPGVALK.Q	1318.7166	0.00	1/0	2
WP_003416703.1	helix-turn-helix transcriptional regulator	helix-turn-helix			1.17	0.00	2
			K.ATIGGSDINK.M	1030.5659	1.17	1/0	2
			K.GASVLLASR.K	900.5393	0.00	0/0	2
			K.LFLEIVDN.-	989.5434	0.00	1/0	2
			K.TVEDIM(15.995)SM(15.995)PVLAK.K	734.352	0.00	0/0	2
			K.TVEDIM(15.995)SMPVLAK.K	734.352	0.00	0/0	2
			K.TVEDIMSM(15.995)PVLAK.K	952.4246	0.00	0/0	2
			K.TVEDIMSMPVLAK.K	1488.7932	0.00	1/0	2
			R.TPNVVTLTK.G	1027.6277	0.00	0/0	2
WP_003422204.1	transcription elongation factor GreA	transcription			1.18	7.17	23
			K.AVIIDESK.I	929.5434	20	0/0	2
			K.EQAQVEER.I	1015.4934	1.56	1/1	2
			K.EVVEVQVPDGVAK.F	1423.7922	0.63	1/1	2
			K.EVVEVQVPDGVAK.F	1423.7922	0.58	1/1	3
			K.FEILEIR.R	946.5488	1.22	1/1	2
			K.ISNESPVGK.A	985.5444	1.18	1/1	2
			K.VAISFGDLSENAEYDEAKK.E	2170.0875	1.14	1/1	3
			K.VAISFGDLSENAEYDEAK.K	2013.9612	0.00	0/0	2
			K.VAISFGDLSENAEYDEAKK.E	2170.0875	0.00	0/0	2
			K.VVKRKEVAER.I	1296.8242	0.00	0/0	2
			R.KAVIIDESK.I	1085.6696	0.00	1/0	2
WP_003434098.1	pyrroline-5-carboxylate reductase	pyrroline-5-carboxylate			1.18	0.88	23
			K.DMVCSPGGTTIEAVK.V	1619.7899	2.84	1/1	2
			K.FASQAVMGSAK.M	1151.6009	0.95	1/1	2
			K.LVEPNMVIASAYSQGTLDR.I	2092.0704	1.12	1/1	3
			R.IDANFGINTTK.D	1248.6714	1.23	1/1	2
			K.AICACIEK.S	1019.5144	0.00	1/0	2
			K.DIESIIGEDKK.I	1329.7392	0.00	0/0	3
			K.DM(15.995)VCSPGGTTIEAVK.V	292.1093	0.00	0/0	2
			K.FASQAVM(15.995)GSAK.M	780.384	0.00	0/0	2
			K.LVEPNMVIASAYSQGTLDR.I	2092.0704	0.00	0/0	2
			K.MVLETGK.H	832.4728	0.00	1/0	2
WP_003420269.1	TerD family protein	TerD			1.19	0.2	23
			R.QNFGQVSNSYIR.I	1439.7157	1.5	1/1	2
			R.RQNFGQVSNSYIR.I	1595.8168	1.19	1/0	2
			R.RQNFGQVSNSYIR.I	1595.8168	1.03	1/1	3
			R.TGEGDGDDEQIVVDLSK.I	1831.8687	1.19	1/1	2
			K.HTSGAVEHLGDNR.T	1419.6855	0.00	1/0	2
			K.HTSGAVEHLGDNR.T	1419.6855	0.00	1/0	3
			R.IVDKDTNEELIK.Y	1499.8447	0.00	0/0	2
			R.IVDKDTNEELIK.Y	1499.8447	0.00	0/0	3
WP_003438469.1	GntR family transcriptional regulator	GntR			1.19	1.28	2
			K.GVIVLSPDK.A	982.6063	1.19	1/1	2
			K.IALDIANK.I	912.5644	0.9	1/1	2
			K.ILDYSNR.L	907.4763	4.49	1/1	2
			K.ILEDIGVVK.S	1040.6481	0.95	1/1	2
			K.SNLENEILDTINK.I	1557.825	1.43	1/1	2
			K.STLYNLIDTK.S	1222.6809	1.11	1/1	2
			K.YIGQTAAQTK.F	1135.6237	1.21	1/1	2
			R.DITNISSYK.S	1095.5812	0.00	1/0	2
WP_003421079.1	HAD-IB family hydrolase	HAD-IB			1.21	0.00	2
			R.VGNPIAINPTK.E	1178.7023	1.21	1/1	2
			K.TCINFTSDQVIK.L	1480.7596	0.00	0/0	2
WP_003430699.1	ribulose-phosphate 3-epimerase	ribulose-phosphate			1.21	0.00	2
			K.NLAMGPELLK.S	1140.6577	1.21	1/1	2
			K.LLHCDVMDGIFVK.N	1601.831	0.00	0/0	3
WP_009897960.1	S-layer protein SlpA	S-layer			1.21	3.23	23
			K.AGETTYSTGLTFEDGSTEK.I	2049.946	1.2	1/1	2
			K.AGETTYSTGLTFEDGSTEK.I	2049.946	1.16	1/1	3
			K.ASIADENSPVK.L	1185.6241	1.35	1/1	2
			K.DLKDYVDDLR.T	1306.6769	0.98	1/1	2
			K.DYVDDLR.T	922.4396	3.28	1/1	2
			K.EETIDIDASSSK.T	1349.6562	5.18	1/1	2
			K.ESSYYQDNLNNDKK.V	1800.853	1.21	1/1	3
			K.EVENELK.D	915.4913	3.56	1/1	2
			K.EVENELKDMGLK.V	1487.7905	0.6	1/1	2
			K.EVENELKDMGLK.V	1487.7905	0.56	1/1	3
			K.GIATSVINK.L	957.5859	1.52	1/1	2
			K.GILDGSITEIK.V	1200.6966	1.09	1/1	2
			K.IADEVGLDNDK.A	1243.6296	2.85	1/1	2
			K.KAPLLLTSK.D	1053.7162	1.2	1/1	2
			K.KVYLAGGVNSISK.E	1418.8497	0.71	1/1	3
			K.LGDSDIIDITK.A	1244.6864	1.29	1/1	2
			K.LTVVPGSK.A	855.543	2.07	1/1	2
			K.MDLADGDATPIVVVDGK.A	1770.9074	1.02	1/1	2
			K.STTGINTSK.K	963.5237	1.84	1/1	2
			K.TDLNTLYK.V	1022.5648	1.84	1/1	2
			K.TPSASVQPVITK.L	1282.7497	2.09	1/1	2
			K.VFFEGTLASTIK.V	1367.7701	0.59	1/1	2
			K.VGSELNAADASK.L	1216.6299	1.24	1/1	2
			K.VLDKDNGENLVQVGK.G	1710.9516	0.85	1/0	3
			K.VLNGDEADTNGLIEEVSGK.Y	2016.0092	0.84	1/1	2
			K.VLNGDEADTNGLIEEVSGK.Y	2016.0092	0.9	1/1	3
			K.VLTGSDNDKNK.L	1273.6878	1.41	1/0	3
			K.VVNFFVAK.D	978.5902	0.88	1/1	2
			K.VYLAGGVNSISK.E	1262.7234	1.08	1/1	2
			K.YQVVLYPEGK.R	1250.6911	1.77	1/1	2
			K.YYNSDDENAIFR.D	1533.6736	2.33	1/1	2
			M.DLADGDATPIVVVDGK.A	1639.8669	20	0/0	2
			R.IETAIALSQK.Y	1128.6754	3.24	1/1	2
			R.IINAKEETIDIDASSSK.T	1918.034	0.67	1/1	3
			R.LAGDDRYETSLK.I	1422.7355	0.97	1/1	2
			R.LAGDDRYETSLK.I	1422.7355	0.79	1/1	3
			A.DDTKVETGDQGYTVVQSK.Y	2054.0249	0.00	0/0	2
			A.DDTKVETGDQGYTVVQSK.Y	2054.0249	0.00	1/0	3
			I.IAGTSSADGVVTNTGAASGSTETNSAGTK.L	2668.2869	0.00	0/0	3
			K.AFVVGGTGLADAM(15.995)SIAPVASQLR.N	1235.622	0.00	0/0	2
			K.AFVVGGTGLADAM(15.995)SIAPVASQLR.N	1235.622	0.00	0/0	3
			K.AVEQLQK.G	870.5175	0.00	1/0	2
			K.DKLDSSVK.A	974.5648	0.00	1/0	2
			K.DVENAIDDATGK.S	1302.6303	0.00	1/0	2
			K.ESSYYQDNLNNDK.K	1644.7268	0.00	1/0	2
			K.ESSYYQDNLNNDKK.V	1800.853	0.00	1/0	2
			K.EVENELKDM(15.995)GLK.V	1161.5587	0.00	0/0	2
			K.LAM(15.995)SAIFDTAYTDSSETAVK.I	361.2035	0.00	0/0	2
			K.LAM(15.995)SAIFDTAYTDSSETAVK.I	361.2035	0.00	0/0	3
			K.LAMSAIFDTAYTDSSETAVK.I	2177.0643	0.00	0/0	2
			K.LKDLLSM.-	874.5198	0.00	1/0	2
			K.M(15.995)DLADGDATPIVVVDGK.A	177.0824	0.00	0/0	2
			K.TAQDLAK.K	801.4596	0.00	1/0	2
			K.VETGDQGYTVVQSK.Y	1565.7937	0.00	1/0	2
			K.VLDKDNGENLVQVGK.G	1710.9516	0.00	0/0	2
			K.YQVVLYPEGKR.V	1406.7922	0.00	0/0	3
			K.YYNSDDENAIFR.D	1533.6736	0.00	0/0	3
			M.SAIFDTAYTDSSETAVK.I	1860.8993	0.00	0/0	2
			N.AIVDGLVASPLASEK.K	1524.8763	0.00	0/0	2
			R.IINAKEETIDIDASSSK.T	1918.034	0.00	0/0	2
			R.TYNNGYSNAIEVAGEDR.I	1899.8599	0.00	0/0	2
			S.ADGVVTNTGAASGSTETNSAGTK.L	2152.0325	0.00	0/0	2
			V.VTNTGAASGSTETNSAGTK.L	1808.8752	0.00	0/0	2
WP_003420866.1	NAD-specific glutamate dehydrogenase	NAD-specific			1.22	0.37	23
			K.GGIIVDPSTLSQGELER.L	1797.9472	1.34	1/1	2
			K.IKEEYNVTMR.E	1337.7013	1.03	1/1	3
			K.LVCEAANGPTTPEADEVFAER.G	2304.0773	1.22	1/1	3
			R.FHQNVSRDEVK.A	1413.7365	0.57	1/1	3
			R.GYIDGIYK.L	983.5328	1.41	1/1	2
			R.TAATGFGVAVTAR.E	1248.6826	1.78	1/1	2
			R.VIEVSIPVK.M	1038.6689	1.18	1/1	2
			K.CSVTGIPYGGGK.G	1250.6329	0.00	0/0	2
			K.DVNVFEM(15.995)AQSQVK.N	880.4001	0.00	0/0	2
			K.DVNVFEMAQSQVK.N	1549.781	0.00	1/0	3
			K.GGIIVDPSTLSQGELER.L	1797.9472	0.00	1/0	3
			K.IAVQGIGNVGSYTVLNCEK.L	2078.0911	0.00	0/0	2
			K.IAVQGIGNVGSYTVLNCEK.L	2078.0911	0.00	0/0	3
			K.LVCEAANGPTTPEADEVFAER.G	2304.0773	0.00	0/0	2
			R.EAAYMHSIKK.V	1260.69	0.00	1/0	3
WP_022618489.1	hypothetical protein	hypothetical			1.23	0.00	2
			R.SYDIGIFK.N	997.5484	1.23	1/1	2
			K.NIEEFLYK.Y	1110.5961	0.00	1/0	2
WP_009902280.1	RnfABCDGE type electron transport complex subunit G	RnfABCDGE			1.27	0.31	2
			K.TAEPLEVAK.G	1012.5805	1.05	1/1	2
			R.NIQANNELR.K	1098.5782	1.49	1/1	2
			K.AKDDAFKGQYK.G	1381.7606	0.00	0/0	2
			K.AKDDAFKGQYK.G	1381.7606	0.00	1/0	3
			R.NIQANNELRK.A	1254.7044	0.00	1/0	2
			R.NIQANNELRK.A	1254.7044	0.00	1/0	3
WP_003429416.1	GTP cyclohydrolase I FolE	GTP			1.3	10.92	2
			R.AEAMSLITMK.-	1149.6138	0.87	1/1	2
			R.EILEAIGEDPDR.E	1383.6882	20	0/0	2
			R.MYEEIFSGLSEEPR.D	1713.792	1.3	1/1	2
			K.AHIAYLPK.G	967.5855	0.00	0/0	2
			R.AEAMSLITM(15.995)K.-	993.4875	0.00	0/0	2
			R.EILEAIGEDPDREGLIETPNR.V	2394.2108	0.00	1/0	3
			R.M(15.995)YEEIFSGLSEEPR.D	177.0824	0.00	0/0	2
WP_009895388.1	energy-coupling factor ABC transporter permease	energy-coupling			1.3	0.00	2
			K.SILENNDK.G	987.5237	1.3	1/1	2
			K.SILENNDKGVK.A	1299.7398	0.00	1/0	2
			K.SILENNDKGVK.A	1299.7398	0.00	0/0	3
WP_009903853.1	GerMN domain-containing protein	GerMN			1.3	1.4	234
			K.IDENTLFEELQK.L	1533.7926	3.53	1/1	2
			K.SNLGSDAETLMLDSVAR.T	1805.8829	1.33	1/1	2
			K.SNLGSDAETLMLDSVAR.T	1805.8829	1.3	1/1	3
			K.SNTNVEQPKEENNTEK.E	1943.9436	4.34	1/1	3
			K.SNTNVEQPKEENNTEKEVPNNK.A	2654.3229	0.9	1/1	3
			K.SNTNVEQPKEENNTEKEVPNNK.A	2654.3229	0.93	1/1	4
			K.TGILDVSSDFTK.S	1337.7079	1.18	1/1	2
			K.LNSFTTK.D	865.4909	0.00	1/0	2
			K.NM(15.995)NVEQIK.I	291.1253	0.00	0/0	2
			K.NMNVEQIK.I	1030.5481	0.00	1/0	2
			K.SNTNVEQPK.E	1071.556	0.00	0/0	2
			K.TQSATIYSFDVDK.T	1529.7613	0.00	1/0	2
WP_003431186.1	bifunctional pyr operon transcriptional regulator/uracil phosph	bifunctional			1.31	0.39	2
			K.GVENLVLVGIK.T	1195.754	1.04	1/1	2
			K.TVVLVDDVLYTGR.T	1476.8188	1.59	1/1	2
WP_003434506.1	dihydroorotate dehydrogenase electron transfer subunit	dihydroorotate			1.32	0.08	2
			K.MGQFYMLR.A	1072.5198	1.32	1/1	2
			K.VALVGGGIGVAPLYLVAK.N	1753.0947	1.38	1/1	2
			K.VVGEGTQILSNLK.V	1412.8239	1.22	1/1	2
			K.YDYILTCGPTPMMEK.L	1874.8698	0.00	0/0	2
WP_003430702.1	transketolase family protein	transketolase			1.33	1.98	2
			K.DVFGQSGTPADLLK.H	1502.7981	1.33	1/1	2
			R.AATPDVNSENYK.F	1363.662	4.43	1/1	2
			R.GIPNMVVLNPADALEAR.Q	1806.9662	0.74	1/1	2
			R.NSVAYPNLNVK.I	1273.703	0.00	1/0	2
WP_009897880.1	pentapeptide repeat-containing protein	pentapeptide			1.33	0.00	2
			K.IIENEVISDLDSVR.V	1628.8621	1.33	1/1	2
			R.NVSFENCNLK.K	1279.6231	0.00	1/0	2
WP_003430626.1	fructose-6-phosphate aldolase	fructose-6-phosphate			1.34	10.83	2
			K.AGANYIAPYVNR.L	1335.6935	1.34	1/1	2
			K.VLAASFK.N	790.4953	20	0/0	2
			R.LDNISGDGVAMVSELIK.I	1815.9652	1.15	1/1	2
			K.ELCTCLPIDGVTTNPSIVSK.E	2260.1524	0.00	0/0	2
			R.LDNISGDGVAM(15.995)VSELIK.I	1118.5278	0.00	0/0	3
			R.LDNISGDGVAMVSELIK.I	1815.9652	0.00	1/0	3
WP_009903713.1	DUF3786 domain-containing protein	DUF3786			1.34	0.00	2
			K.NNYNVPFDYVR.K	1427.6834	1.34	1/1	2
			K.EIPGGNVYYPNFLNR.T	1780.8978	0.00	1/0	2
WP_003417090.1	trigger factor	trigger			1.38	0.00	2
			K.VENTVSDENVDAK.L	1474.7151	1.38	1/1	2
			R.IVIETQYGK.G	1105.6383	0.00	1/0	2
WP_003420885.1	orotate phosphoribosyltransferase	orotate			1.39	0.62	23
			K.EAVFTER.K	878.4498	2	1/1	2
			K.EGKLPVVKPGSR.E	1349.8395	1.39	1/1	3
			K.IIIAEDVVTTGK.S	1313.7806	1.12	1/1	2
			K.VDVVDILK.K	955.5954	1.06	1/1	2
			R.KDNTMELR.R	1061.5539	2.49	1/1	2
			R.TNHDIGM(15.995)PIYSAIK.L	814.3643	0.00	0/0	3
			R.TNHDIGMPIYSAIK.L	1614.844	0.00	1/0	3
			R.VLEALGGEVVGVACIADR.T	1854.9873	0.00	0/0	2
WP_003436212.1	ATP-dependent Clp endopeptidase proteolytic subunit ClpP	ATP-dependent			1.39	0.00	3
			R.DTDRDNFMTALEAK.E	1681.7981	1.39	1/1	3
			M.SLVPHVIEQTGQGER.S	1676.8846	0.00	0/0	3
WP_009892015.1	5-formyltetrahydrofolate cyclo-ligase	5-formyltetrahydrofolate			1.39	0.24	2
			K.LLQMEDIR.N	1044.5638	1.39	1/1	2
			K.SANFVLSNSNLITEK.L	1691.9094	1.01	1/1	2
			R.LGYGGGFYDR.F	1131.5349	1.46	1/1	2
WP_025992040.1	2,3-bisphosphoglycerate-independent phosphoglycerate mutase	2,3-bisphosphoglycerate-independent			1.41	0.00	2
			K.AVETVDTCVGK.L	1233.6275	1.41	1/1	2
			R.DTDPQSALEYAK.E	1392.6773	0.00	0/0	2
			R.IVYQDLTR.I	1034.576	0.00	1/0	2
			R.LLIPSPK.V	822.5579	0.00	0/0	2
[truncated: 1,366 more rows]
