# Supplementary material for: Characterizing metabolic drivers of Clostridioides difficile infection with activity-based hydrazine probes
Source: Front Pharmacol. 2023 Jan 26;14:1074619. doi: 10.3389/fphar.2023.1074619 (PMC9908766; doi:10.3389/fphar.2023.1074619)
Supplement: Supplementary file 3 [file DataSheet3.xlsx]

## Sheet: Summary
Supplementary Dataset 3. Comparison of average protein ratios with standard deviations for in-gel digestion ReDiMe experiments quantifying protein expression from Clostridioides difficile VPI10463 strain cultivated in BHIS and MM. Representative datasets for each type of experiment are also included. These datasets are shown in separate tabs (3 in total), each displaying median ReDiMe ratios for …

## Sheet: Average protein ratio
Accession	description	Heavy:Light Ratio
		Average			Standard Deviation
		Expression			Expression
					n=2	n=2	n=2
		BHIS:BHIS	MM:MM	MM:BHIS	BHIS:BHIS	MM:MM	MM:BHIS
WP_003422104.1	D-proline reductase (dithiol) proprotein PrdA	1.03	0.95	1.005	0.0848528	0.0141421	0.304056
WP_003416871.1	glycine/sarcosine/betaine reductase component B subunit, GrdE	1.02	0.94	1.125	0	0	0.233345
WP_009902687.1	lipoprotein	1.52	0.99	1.4		0.0707107
WP_009903648.1	hypothetical protein	1.36
WP_009897948.1	cell wall-binding cysteine protease Cwp84	1.34	1.015	0.785	0.311127	0.0212132	0.33234
WP_004454770.1	tRNA threonylcarbamoyladenosine dehydratase	1.32			0.46669
WP_009891775.1	ribosome biogenesis GTP-binding protein YihA/YsxC	1.31	1.115	0.46	0.282843	0.0777817	0.226274
WP_003428430.1	GNAT family N-acetyltransferase	1.28	0.92	0.94	0.282843
WP_003438030.1	nitroreductase family protein	1.27	0.98			0.0989949
WP_009895388.1	energy-coupling factor ABC transporter permease	1.27
WP_009898301.1	phosphopyruvate hydratase	1.23	0.945	1.3	0.296985	0.00707107	0.509117
WP_009888019.1	anaerobic carbon-monoxide dehydrogenase catalytic subunit	1.225	0.985	2.145	0.162635	0.0212132	0.205061
WP_003434455.1	ABC transporter ATP-binding protein	1.215			0.219203
WP_009891147.1	YhbD family protein	1.21	1.17
WP_009888725.1	4Fe-4S dicluster domain-containing protein	1.18	0.9	1.56			0.127279
WP_003425850.1	F0F1 ATP synthase subunit beta	1.175	1.11	0.195	0.219203	0.113137	0.0777817
WP_003420704.1	hypothetical protein	1.165	0.92	0.51	0.0636396		0.155563
WP_009903270.1	low-specificity L-threonine aldolase	1.16	0.9		0.155563
WP_003428245.1	NAD-dependent protein deacylase	1.155	1.155	0.64	0.13435	0.205061	0.0848528
WP_003421163.1	30S ribosomal protein S3	1.15	0.98
WP_009895182.1	proline--tRNA ligase	1.145	1.07	0.29	0.346482
WP_009903853.1	GerMN domain-containing protein	1.145	1	1.625	0.219203	0	0.459619
WP_009892717.1	GntR family transcriptional regulator	1.145		0.49	0.0353553		0.0848528
WP_009893687.1	YggS family pyridoxal phosphate-dependent enzyme	1.14	0.94	0.7	0.141421	0.0141421	0.0565685
WP_009897067.1	transcriptional repressor LexA	1.135	1.02	0.55	0.190919		0.0565685
WP_003419057.1	septum site-determining protein MinD	1.13	0.97	0.335	0.155563	0.0282843	0.0212132
WP_003428343.1	hypothetical protein	1.13	0.975	0.8	0.0848528	0.0353553	0.169706
WP_003427763.1	(R)-2-hydroxyisocaproyl-CoA dehydratase subunit beta	1.125	0.94	0.26	0.0919239		0
WP_003434148.1	triose-phosphate isomerase	1.12	0.935	1.435	0.141421	0.0353553	0.176777
WP_003421117.1	50S ribosomal protein L17	1.11
WP_009902143.1	formate C-acetyltransferase	1.105		0.16	0.0919239
WP_011861888.1	D-proline reductase (dithiol) protein PrdB	1.105	0.95	0.75	0.0777817	0.0565685	0.127279
WP_003428218.1	recombinase RecA	1.1	1.065			0.233345
WP_009901962.1	hypothetical protein	1.1	0.94	20		0.0282843	0
WP_009903671.1	proline reductase cluster protein PrdD	1.1	0.995	2.38		0.120208
WP_003434235.1	protein jag	1.095	0.98	0.575	0.106066	0	0.00707107
WP_003421187.1	50S ribosomal protein L10	1.095	0.975	1.445	0.0494975	0.00707107	0.247487
WP_003436174.1	DNA-directed RNA polymerase subunit beta	1.09	0.92	0.82			0.113137
WP_003430209.1	Mrp/NBP35 family ATP-binding protein	1.09
WP_003436215.1	tRNA-binding protein	1.09
WP_009891044.1	sugar transferase	1.09
WP_009903855.1	16S rRNA (guanine(527)-N(7))-methyltransferase RsmG	1.085		0.525	0.205061		0.00707107
WP_003436878.1	HD domain-containing protein	1.085	1.01	0.81	0.00707107		0.155563
WP_003418888.1	acyl-CoA dehydrogenase	1.085	0.885	0.96	0.0353553	0.0777817	0.212132
WP_009902469.1	cysteine hydrolase	1.085	0.985	1.585	0.0494975	0.13435	0.233345
WP_009898446.1	pyrroline-5-carboxylate reductase	1.08	0.95	0.985	0.0848528	0.0424264	0.0494975
WP_009891957.1	cobalt-precorrin-4 methyltransferase	1.08	0.96	1.025	0.0565685		0.0212132
WP_003434506.1	dihydroorotate dehydrogenase electron transfer subunit	1.08	0.955	1.58		0.0494975	0.367696
WP_009902455.1	LamB/YcsF family protein	1.08
WP_009887887.1	50S ribosomal protein L4	1.075	0.97	0.48	0.162635	0.0707107	0.155563
WP_003420866.1	NAD-specific glutamate dehydrogenase	1.075	0.945	1.315	0.106066	0.0353553	0.13435
WP_003430302.1	TerD family protein	1.075	0.985	0.77	0.106066	0.00707107	0.0424264
WP_009898087.1	pentapeptide repeat-containing protein	1.075	0.96	0.465	0.00707107		0.106066
WP_009903412.1	SIS domain-containing protein	1.07	0.97	0.33	0.183848	0.0141421	0.0424264
WP_003431407.1	D-2-hydroxyacid dehydrogenase	1.07	1.02	0.83	0.0565685	0.0565685	0.0707107
WP_003424529.1	isoprenyl transferase	1.07	0.91	0.5	0.0424264		0.0848528
WP_009892132.1	GntR family transcriptional regulator	1.07	0.935	0.555	0.0424264	0.0353553	0.0919239
WP_004454389.1	2-hydroxyglutaryl-CoA dehydratase	1.07	0.945	0.96	0	0.0494975	0.0282843
WP_004454472.1	response regulator transcription factor	1.07		0.69			0.155563
WP_009902140.1	nitroreductase	1.07	0.935	1.215		0.00707107	0.304056
WP_003437451.1	pyruvate formate lyase-activating protein	1.065		0.055	0.0919239		0.00707107
WP_003438024.1	helix-turn-helix domain-containing protein	1.06	0.93	0.355	0.127279		0.106066
WP_009892113.1	thymidylate kinase	1.06	0.96	1.18	0.127279
WP_003417352.1	class II fructose-1,6-bisphosphate aldolase	1.06	0.96	2.16	0.0282843	0.0565685
WP_003420269.1	TerD family protein	1.06	0.975	1.225	0.0282843	0.0212132	0.0494975
WP_003416528.1	uracil-DNA glycosylase	1.06	0.945	0.74	0.0141421	0.0212132	0.0282843
WP_009901809.1	(R)-2-hydroxyisocaproyl-CoA dehydratase subunit HadB	1.06			0
WP_003418513.1	rubrerythrin family protein	1.055	0.93	0.26	0.148492	0.0424264	0.0707107
WP_003417347.1	electron transfer flavoprotein subunit alpha/FixB family pr	1.055	0.975	0.32	0.106066	0.00707107	0
WP_003421367.1	F0F1 ATP synthase subunit alpha	1.055	0.98	0.38	0.0919239
WP_003435816.1	DUF1847 domain-containing protein	1.055	0.955	2.15	0.0919239	0.00707107	0.636396
WP_003435668.1	50S ribosomal protein L6	1.055	0.955	0.38	0.0636396	0.0353553	0.240416
WP_009895750.1	cell division protein ZapA	1.055	0.935	0.78	0.0636396	0.0353553	0.0848528
WP_003430598.1	ribosome recycling factor	1.055	0.935	0.89	0.0353553	0.0353553	0.127279
WP_003439113.1	lipoprotein	1.055	0.99	0.645	0.0353553	0.0282843	0.0919239
WP_003434417.1	ribosome-associated translation inhibitor RaiA	1.05	0.93	0.8	0.0424264	0.0141421	0.212132
WP_009897956.1	cell wall-binding protein Cwp2	1.05	0.915	0.98	0.0282843	0.0636396	0.0848528
WP_003439413.1	shikimate kinase	1.05	0.945	20		0.0494975	0
WP_004454512.1	TerD family protein	1.05	0.965	3.795		0.0494975	0.0777817
WP_009895854.1	alpha-hydroxy-acid oxidizing protein	1.05
WP_003430702.1	transketolase family protein	1.05	0.99	1.255		0.0707107	0.106066
WP_009890358.1	alpha/beta hydrolase	1.045	0.8	0.46	0.148492
WP_003417965.1	helix-turn-helix transcriptional regulator	1.045	0.885	0.64	0.0919239	0.0212132	0.0282843
WP_003436172.1	SDR family oxidoreductase	1.045	0.945	0.415	0.0919239	0.0494975	0.00707107
WP_009902542.1	lactate utilization protein	1.045	0.955	0.675	0.0919239	0.00707107	0.233345
WP_003417102.1	ATP-dependent Clp endopeptidase proteolytic subunit ClpP	1.045	0.95	0.665	0.0636396	0.0424264	0.0919239
WP_003427766.1	isocaprenoyl-CoA:2-hydroxyisocaproate CoA-transferase HadA	1.045	0.91	0.175	0.0494975	0	0.0212132
WP_009898069.1	bifunctional acetaldehyde-CoA/alcohol dehydrogenase	1.045	0.955	1.185	0.0494975	0.0212132	0.0636396
WP_004454870.1	hypothetical protein	1.045	0.93	0.94	0.0353553	0.0282843	0.0282843
WP_009887863.1	elongation factor Tu	1.045	0.985	0.935	0.0353553	0.0212132	0.162635
WP_003439494.1	TerD family protein	1.045	0.89	0.64	0.00707107	0.0565685	0.0424264
WP_003420702.1	butyrate kinase	1.04	0.99	0.35	0.0989949	0.0282843
WP_003421188.1	50S ribosomal protein L1	1.04	0.94	0.54	0.0848528	0.0141421	0.155563
WP_003439746.1	tRNA-binding protein	1.04	1.05	0.66	0.0707107		0.141421
WP_009888223.1	2-hydroxyisocaproyl-CoA dehydratase activator HadI	1.04	0.97	0.1	0.0707107	0.0989949	0.0141421
WP_003418356.1	dihydropteroate synthase	1.04	0.95	7.545	0.0282843	0.0424264	1.53442
WP_003431138.1	ribulose-phosphate 3-epimerase	1.04	0.905	0.865	0.0282843	0.0494975	0.176777
WP_009889023.1	elongation factor P	1.04	0.99	0.625	0.0282843	0.0141421	0.106066
WP_003434069.1	cell division protein	1.04	0.94	2.535		0	0.459619
WP_009898664.1	decarboxylating cobalt-precorrin-6B (C(15))-methyltransferase	1.04	0.9	0.69
WP_009902281.1	septum formation inhibitor Maf	1.04	0.94	0.76
WP_009898403.1	ImmA/IrrE family metallo-endopeptidase	1.035			0.205061
WP_003437840.1	uracil phosphoribosyltransferase	1.035	0.915	0.455	0.162635	0.00707107	0.0636396
WP_003421121.1	30S ribosomal protein S4	1.035	1.01	0.45	0.0777817	0.0565685	0.0989949
WP_003428442.1	3-oxoacyl- 3-oxoacyl-	1.035	0.905	0.605	0.0777817	0.0919239	0.0212132
WP_009897922.1	phosphoenolpyruvate--protein phosphotransferase	1.035	1.035	1.325	0.0777817	0.0919239	0.219203
WP_009902280.1	RnfABCDGE type electron transport complex subunit G	1.035	1.02	1.26	0.0777817	0	0.0141421
WP_003435673.1	50S ribosomal protein L5	1.035	0.93	0.565	0.0636396	0.0141421	0.13435
WP_009903837.1	DUF488 domain-containing protein	1.035	1.02	0.54	0.0636396		0.127279
WP_003438268.1	GTP-sensing pleiotropic transcriptional regulator CodY	1.035	0.935	0.475	0.0212132	0.0212132	0.120208
WP_009889331.1	helix-turn-helix transcriptional regulator	1.035	0.985	0.93	0.0212132	0.0212132	0.0989949
WP_003429754.1	ABC transporter ATP-binding protein	1.035	0.9	0.555	0.00707107	0.0565685	0.0212132
WP_003434098.1	pyrroline-5-carboxylate reductase	1.035	0.94	1.135	0.00707107	0.0282843	0.0636396
WP_003432265.1	cyclodeaminase/cyclohydrolase family protein	1.03	0.915	3.15	0.113137	0.00707107	0.876812
WP_009901862.1	salicylate synthase	1.03			0.0848528
WP_003425856.1	F0F1 ATP synthase subunit delta	1.03	0.935	0.335	0.0707107	0.0636396	0.0353553
WP_003435129.1	lactate utilization protein	1.03	0.975	0.87	0.0707107	0.0494975	0.113137
WP_003429190.1	ATP-binding cassette domain-containing protein	1.03	0.89	0.44	0.0424264	0.0141421	0.0848528
WP_009897862.1	pyruvate:ferredoxin (flavodoxin) oxidoreductase	1.03	0.955	0.465	0.0424264	0.00707107	0.0494975
WP_003421962.1	type I glyceraldehyde-3-phosphate dehydrogenase	1.03	0.93	2.41	0.0141421	0.0141421	0.0424264
WP_009893498.1	GNAT family N-acetyltransferase	1.03		0.765			0.233345
WP_009902783.1	histidine phosphatase family protein	1.03	0.92	0.905			0.219203
WP_003421168.1	50S ribosomal protein L2	1.03		1.01	0.0141421
WP_009897952.1	cell wall-binding repeat-containing protein	1.025	1	0.095	0.0919239		0.00707107
WP_009903755.1	precorrin-3B C(17)-methyltransferase	1.025	0.975	0.84	0.0636396	0.0212132	0.169706
WP_003430279.1	tRNA pseudouridine(38-40) synthase TruA	1.025	1.1	0.38	0.00707107
WP_003438469.1	GntR family transcriptional regulator	1.025	0.925	1.145	0.00707107	0.0212132	0.0636396
WP_009889030.1	16S rRNA processing protein RimM	1.025	0.9	0.68	0.00707107	0.0424264	0.0565685
WP_003416006.1	hypoxanthine phosphoribosyltransferase	1.02		0.375	0.169706		0.13435
WP_003429565.1	phosphoglycerate kinase	1.02	0.97	1.6	0.0848528	0.0141421
WP_004454531.1	TerD family protein	1.02	0.98	2.005	0.0565685	0.0141421	0.92631
WP_003421130.1	type I methionyl aminopeptidase	1.02			0.0424264
WP_009891708.1	DUF4364 family protein	1.02	1.14	0.7	0.0424264		0.169706
WP_003435194.1	ATP-dependent chaperone ClpB	1.02	0.97	0.05	0.0282843	0.0141421	0.0141421
WP_003436178.1	elongation factor G	1.02	0.895	0.73	0.0282843	0.106066	0
WP_003435286.1	TetR/AcrR family transcriptional regulator	1.02
WP_004454488.1	flavodoxin family protein	1.02	0.95	2.43		0.0707107	0.311127
WP_009902746.1	cell wall-binding cysteine protease Cwp13	1.02
WP_003420839.1	redox-sensing transcriptional repressor Rex	1.015	1.015	0.88	0.219203	0.0353553	0.0848528
WP_009901929.1	ABC transporter ATP-binding protein	1.015	0.96	0.31	0.120208		0.0282843
WP_009891688.1	hypoxanthine phosphoribosyltransferase	1.015	0.955	0.61	0.0777817	0.0212132	0.0989949
WP_009897960.1	S-layer protein SlpA	1.015	0.91	1.175	0.0494975	0.0141421	0.0494975
WP_003430597.1	UMP kinase	1.015	0.92	0.615	0.0353553	0.0282843	0.106066
WP_003427762.1	acyl-CoA dehydrogenase family protein	1.015	0.92	0.255	0.0212132	0.0141421	0.0494975
WP_009887855.1	23S rRNA (guanosine(2251)-2-O)-methyltransferase RlmB	1.015	0.94	0.45	0.0212132	0	0.0424264
WP_003425980.1	type III pantothenate kinase	1.015	0.895	0.935	0.0353553	0.00707107	0.190919
WP_003426928.1	DivIVA domain-containing protein	1.015	0.93	1.005	0.0353553	0.0141421	0.205061
WP_003421194.1	NYN domain-containing protein	1.01			0.0989949
WP_003424711.1	sporulation transcription factor Spo0A	1.01	0.915	0.69	0.0848528	0.0353553	0.0141421
WP_003420710.1	MFS transporter	1.01	0.98	1.075	0.0707107	0.0282843	0.0353553
WP_003423115.1	fructose-6-phosphate aldolase	1.01	0.935	0.85	0.0141421	0.00707107	0.0707107
WP_003419857.1	Fis family transcriptional regulator	1.01	0.98	0.82
WP_003430074.1	TerD family protein	1.01	1.025	0.94		0.0353553	0.212132
WP_003428474.1	FprA family A-type flavoprotein	1.01	0.84	0.64
WP_009901694.1	nickel pincer cofactor biosynthesis protein LarB	1.005		0.265	0.00707107		0.0353553
WP_025992033.1	nucleotide exchange factor GrpE	1.005	0.92	0.13	0.00707107		0.0141421
WP_009892068.1	aminoacyl-tRNA hydrolase	1.005		0.46	0.0212132
WP_003419758.1	DUF3867 domain-containing protein	1	0.915	0.72	0.0282843	0.0494975	0.113137
WP_003426034.1	ABC transporter ATP-binding protein	1
WP_003431048.1	bis(5-nucleosyl)-tetraphosphatase (symmetrical) YqeK	1	0.98	0.915		0.0282843	0.247487
WP_009898027.1	HAD family phosphatase	1
WP_003428487.1	RnfABCDGE type electron transport complex subunit D	1
WP_003437218.1	alpha/beta hydrolase	1
WP_009898085.1	GyrI-like domain-containing protein	1
WP_009901692.1	chaperonin GroEL	1
WP_009896932.1	response regulator transcription factor	0.995	0.97	0.725	0.289914		0.304056
WP_004454633.1	xanthine phosphoribosyltransferase	0.995	0.93	1.05	0.0919239	0.0282843	0
WP_009888867.1	electron transfer flavoprotein subunit beta/FixA family pro	0.995	0.935	1.385	0.0777817	0.0777817	0.572756
WP_009889371.1	NADH peroxidase	0.995	0.885	1.38	0.0777817	0.0212132	0.777817
WP_003433947.1	4Fe-4S binding protein	0.995			0.0636396
WP_003416023.1	phosphate propanoyltransferase	0.995	0.925	0.475	0.0494975	0.0212132	0.0494975
WP_003427760.1	electron transfer flavoprotein subunit beta/FixA family pro	0.995	0.965	0.175	0.0353553	0.00707107	0.0353553
WP_003434301.1	nitroreductase family protein	0.995	0.9	0.665	0.0353553	0.0282843	0.190919
WP_009901573.1	adenylate kinase	0.995	0.91	0.7	0.0353553	0.0141421	0.113137
WP_003421197.1	FAD-dependent thymidylate synthase	0.995	0.955	0.425	0.0212132	0.0212132	0.0353553
WP_003421190.1	transcription termination/antitermination factor NusG	0.99	0.93	0.475	0.127279	0.0424264	0.0494975
WP_003416253.1	zinc metallopeptidase	0.99	0.975	0.73	0.0707107	0.00707107	0.141421
WP_003421173.1	50S ribosomal protein L3	0.99	0.935	0.21	0.0707107	0.0212132	0.0141421
WP_009896192.1	cysteine desulfurase NifS	0.99	0.97	0.61	0.0424264	0.0141421	0.0141421
WP_003418769.1	helix-turn-helix transcriptional regulator	0.99	1.02	0.64			0.0989949
WP_003429416.1	GTP cyclohydrolase I FolE	0.99	0.88	1.33		0.0565685	0.0424264
WP_009903328.1	cell wall-binding protein Cwp10	0.99
WP_009891694.1	TSUP family transporter	0.985	0.9	6.035	0.0636396		0.968736
WP_003431170.1	guanylate kinase	0.985	0.97	0.825	0.0494975	0	0.219203
WP_003424537.1	30S ribosomal protein S2	0.985	0.915	0.795	0.0212132	0.00707107	0.275772
WP_003428379.1	NUDIX hydrolase	0.985	0.945	0.72	0.0212132	0.106066	0.169706
WP_011861621.1	peptidoglycan editing factor PgeF	0.98	0.93	0.66	0.0848528
WP_009892314.1	sulfurtransferase-like selenium metabolism protein YedF	0.98	0.75	0.485	0.0565685	0.226274	0.0919239
WP_003438166.1	O-methyltransferase	0.98
WP_003439571.1	DeoR/GlpR transcriptional regulator	0.98
WP_009902717.1	radical SAM protein	0.975		0.2	0.13435
WP_003422204.1	transcription elongation factor GreA	0.97	0.92	0.95	0.0707107	0.0282843	0.325269
WP_004454825.1	recombination regulator RecX	0.97	1.02	0.34	0.0707107		0.0565685
WP_003419125.1	enoyl- enoyl-	0.97	1.03	0.315	0.0565685	0.0707107	0.120208
WP_003438917.1	hypothetical protein	0.97			0.0565685
WP_009903260.1	HAD family hydrolase	0.97	0.82	0.81	0.0424264	0.0707107	0.282843
WP_003419930.1	NADH peroxidase	0.97	0.895	1.36	0.0141421	0.0353553	0.707107
WP_009902250.1	phosphodiesterase	0.97		1.205			0.487904
WP_003428771.1	cyclase family protein	0.97	0.94	1.615	0.0141421	0	0.190919
WP_032507408.1	diphthine--ammonia ligase	0.97	0.96	0.875	0.0424264		0.0353553
WP_009890867.1	cell division protein FtsZ	0.97	0.91	1.5		0
WP_003420885.1	orotate phosphoribosyltransferase	0.965	0.895	1.635	0.0919239	0.0353553	0.346482
WP_009895920.1	GntR family transcriptional regulator	0.96	0.97	0.695	0.0565685		0.0212132
WP_009903196.1	ribosome-associated translation inhibitor RaiA	0.96	0.95	0.47	0.0565685		0.0141421
WP_009902192.1	cell wall-binding protein Cwp25	0.96	0.84
WP_003439345.1	deoxyribose-phosphate aldolase	0.955	0.885	0.64	0.0636396	0.0353553	0.0848528
WP_003429271.1	PLP-dependent aminotransferase family protein	0.945	0.95	2.26	0.0494975	0.0141421	0.876812
WP_003434107.1	MetQ/NlpA family ABC transporter substrate-binding protein	0.945	0.93	2.235	0.0494975	0.0707107	0.0777817
WP_011860916.1	translation initiation factor IF-3	0.94	0.905	0.54	0.0565685	0.0353553	0.0707107
WP_003438086.1	FadR family transcriptional regulator	0.94	0.92
WP_009903761.1	cobalt-precorrin-8 methylmutase	0.94	0.98	1.45		0.0282843	0.509117
WP_009890640.1	DUF4342 domain-containing protein	0.93	0.895	1.935	0.0141421	0.00707107	0.205061
WP_009901935.1	response regulator transcription factor	0.93
WP_009903387.1	hypothetical protein	0.93
WP_009890612.1	pyruvate, phosphate dikinase	0.925	0.88	0.635	0.0777817		0.106066
WP_003438808.1	4-hydroxy-tetrahydrodipicolinate reductase	0.92	0.81		0.0565685
WP_003432043.1	TrmB family transcriptional regulator	0.92
WP_004454137.1	MBL fold metallo-hydrolase	0.91	0.915	0.87	0.0707107	0.0636396	0.212132
WP_004454042.1	serine dehydratase subunit alpha family protein	0.905	1	2.025	0.0353553	0.113137	0.0353553
WP_003436400.1	FAD-dependent oxidoreductase	0.9	0.885	2.44		0.0353553	0.494975
WP_003436882.1	aminoacyl-histidine dipeptidase	0.885			0.190919
WP_003435191.1	hypothetical protein	0.88
WP_003417090.1	trigger factor	0.865	0.92	1.15	0.0636396
WP_003437535.1	NAD(+) synthase	0.86	0.98	0.9
WP_003426450.1	adenine phosphoribosyltransferase	0.83	1.02	0.58		0.0424264	0.240416
WP_003420711.1	2-oxoacid:acceptor oxidoreductase family protein	0.82	0.905	0.725	0.282843	0.0212132	0.148492
WP_003437082.1	D-3-phosphoglycerate dehydrogenase		0.71
WP_009903233.1	alanine--glyoxylate aminotransferase family protein		0.89	20		0.0989949	0
WP_003436669.1	bifunctional phosphoribosyl-AMP cyclohydrolase/phosphoribosyl-A		0.945	4.5		0.162635	1.89505
WP_003416187.1	5-methylthioadenosine/adenosylhomocysteine nucleosidase		0.84	0.7			0.0282843
WP_003421125.1	30S ribosomal protein S13		0.86	3.89		0.0141421
WP_003432207.1	transporter substrate-binding domain-containing protein		0.86
WP_003418897.1	3-hydroxybutyryl-CoA dehydrogenase		1.035	1.475		0.219203	0.0777817
WP_003429162.1	orotidine-5-phosphate decarboxylase		0.92	19		0.0565685	1.41421
WP_004454497.1	sugar O-acetyltransferase		0.88
WP_003437079.1	DUF1015 domain-containing protein		0.91	20		0.0141421
WP_009901734.1	bifunctional phosphoribosylaminoimidazolecarboxamide formyltran		0.915	20		0.00707107	0
WP_003431873.1	proline reductase-associated electron transfer protein Prd		0.935	20		0.00707107
WP_003436064.1	phosphoribosylglycinamide formyltransferase		0.935	20		0.00707107	0
WP_003437730.1	precorrin-6A reductase		0.93
WP_009889364.1	tyrosine--tRNA ligase		0.915	20		0.0353553
WP_009891793.1	4Fe-4S dicluster domain-containing protein		0.88	20		0.0848528	0
WP_009902544.1	3-methyl-2-oxobutanoate hydroxymethyltransferase		0.94	2.87
WP_009903399.1	C-GCAxxG-C-C family protein		0.94
WP_009903738.1	pyruvate kinase		0.98			0.0565685
WP_009902118.1	anaerobic carbon-monoxide dehydrogenase catalytic subunit		1.025			0.106066
WP_003423380.1	carbonic anhydrase		0.995	1.855		0.0494975	0.205061
WP_003424455.1	response regulator transcription factor		0.96	0.79
WP_003421448.1	ribose-phosphate pyrophosphokinase		1.035			0.0919239
WP_003425288.1	amidophosphoribosyltransferase		0.985	20		0.0212132	0
WP_003432205.1	amino acid ABC transporter ATP-binding protein		1.01	2.05		0.0565685	0.212132
WP_003436678.1	imidazole glycerol phosphate synthase subunit HisH		0.93	4.12		0.0565685	1.14551
WP_003430159.1	NifB/NifX family molybdenum-iron cluster-binding protein		0.98
WP_003435562.1	serine--tRNA ligase		0.97	2.76		0.0141421
WP_009901735.1	phosphoribosylformylglycinamidine synthase		0.98	20			0
WP_009902802.1	shikimate dehydrogenase		0.93	20		0.0707107
WP_003428191.1	pyridoxamine kinase		1.055	1.915		0.0919239	1.11016
WP_003426384.1	response regulator transcription factor		1	0.96
WP_009888868.1	acetyl-CoA C-acetyltransferase		1
WP_003436675.1	1-(5-phosphoribosyl)-5- 1-(5-phosphoribosyl)-5-		0.985	2.91		0.0353553
WP_009901804.1	TIGR04100 family radical SAM protein		0.97	10.17		0.0565685	3.35169
WP_003422659.1	V-type ATP synthase subunit E		1.01	20		0.0141421
WP_003428889.1	carboxymuconolactone decarboxylase family protein		1.02	20
WP_004454888.1	nitroreductase family protein		1.03
WP_003435637.1	trypsin-like peptidase domain-containing protein		0.985			0.0777817
WP_009890262.1	GNAT family N-acetyltransferase		1.03	12.96		0.0141421
WP_009897329.1	transporter substrate-binding domain-containing protein		1.02	2.98		0.0282843
WP_003422090.1	proline racemase		1.01	9.135		0.0707107	4.70226
WP_009902004.1	hydrolase		1.04	3.31		0.0848528
WP_003434191.1	peptidylprolyl isomerase		1.11
WP_003421148.1	30S ribosomal protein S8		1.1	1.98		0.113137
WP_003433936.1	amino acid ABC transporter substrate-binding protein		1.125	2.27		0.247487
WP_009888533.1	formate--tetrahydrofolate ligase		0.75
WP_003421180.1	30S ribosomal protein S7		0.77
WP_003432462.1	methionine adenosyltransferase		0.78
WP_003436558.1	SGNH/GDSL hydrolase family protein		0.8
WP_003424103.1	coenzyme F420-0:L-glutamate ligase		0.84	0.82
WP_003426952.1	TetR/AcrR family transcriptional regulator		0.84
WP_003419111.1	DUF177 domain-containing protein		0.86	0.5
WP_003438357.1	pyridoxal phosphate-dependent aminotransferase		0.86	1.18
WP_009893310.1	3-dehydroquinate synthase		0.86	20
WP_003434936.1	SEC-C domain-containing protein		0.87	3.68
WP_003437060.1	Fe-S-containing hydro-lyase		0.87	11.315			12.2824
WP_009888339.1	DUF975 family protein		0.87	1.94
WP_009903754.1	porphobilinogen synthase		0.87
WP_009902665.1	PepSY domain-containing protein		0.88	0.47
WP_003437039.1	glucosamine-6-phosphate deaminase		0.89	20
WP_009891012.1	hypothetical protein		0.9
WP_003436176.1	30S ribosomal protein S12		0.91
WP_009892015.1	5-formyltetrahydrofolate cyclo-ligase		0.91	1.39
WP_009897782.1	DUF116 domain-containing protein		0.93
WP_009902785.1	1-acyl-sn-glycerol-3-phosphate acyltransferase		0.93	1.455			0.120208
WP_003416703.1	helix-turn-helix transcriptional regulator		0.94	0.71
WP_003434976.1	YbhB/YbcL family Raf kinase inhibitor-like protein		0.94
WP_009901472.1	zinc ribbon domain-containing protein		0.95	1.52
WP_003425341.1	glutamine-hydrolyzing GMP synthase		0.96
WP_003426939.1	PFL family protein		0.97
WP_003436912.1	methylenetetrahydrofolate reductase C-terminal domain-containing protein		0.98	20			0
WP_009901733.1	phosphoribosylformylglycinamidine cyclo-ligase		0.98	20
WP_004454961.1	sugar ABC transporter substrate-binding protein		0.99
WP_009903275.1	aminopeptidase P family protein		1
WP_003428415.1	transcription antitermination factor NusB		1.02	0.81			0.0989949
WP_009892576.1	NAD(P)/FAD-dependent oxidoreductase		1.02
WP_009903358.1	V-type ATP synthase subunit D		1.02
WP_003432442.1	3-methyl-2-oxobutanoate dehydrogenase subunit VorB		1.04	1.46
WP_009888750.1	alanine--glyoxylate aminotransferase family protein		1.05	20			0
WP_009897856.1	ABC transporter permease		1.05	1.52
WP_009902539.1	TlpA family protein disulfide reductase		1.06	20
WP_009902949.1	amino acid racemase		1.27
WP_003435799.1	HAD family hydrolase			0.34
WP_009898732.1	ribonuclease M5			0.46
WP_009897939.1	glycosyl transferase			0.53
WP_009903721.1	DJ-1/PfpI family protein			0.54
WP_009901787.1	putative manganese-dependent inorganic diphosphatase			0.8
WP_009895825.1	YigZ family protein			0.82
WP_003421155.1	50S ribosomal protein L14			0.975			0.00707107
WP_009901540.1	recombination mediator RecR			0.97
WP_003421079.1	HAD-IB family hydrolase			1.18
WP_003431186.1	bifunctional pyr operon transcriptional regulator/uracil phosph			1.25			0.0848528
WP_003423398.1	TetR/AcrR family transcriptional regulator			1.27
WP_003421141.1	50S ribosomal protein L18			1.45
WP_009902000.1	threonine--tRNA ligase			1.46
WP_003420527.1	30S ribosomal protein S18			2.52
WP_003437481.1	DUF3100 domain-containing protein			20
WP_009897942.1	N-acetylmuramoyl-L-alanine amidase			20			0
WP_003419115.1	transcription factor FapR			0.35
WP_004454829.1	hypothetical protein			0.6
WP_003430626.1	fructose-6-phosphate aldolase			1.34
WP_003431108.1	16S rRNA (guanine(966)-N(2))-methyltransferase RsmD			2.12
WP_003437525.1	NUDIX hydrolase			11.69
WP_009903436.1	DUF523 domain-containing protein			20

## Sheet: BHIS_BHIS ratios
Replicate 1 : BHIS expression
Accession	description	symbol	sequence	mass	median ratio	standard deviation	charge
WP_003436292.1	ABC transporter ATP-binding protein	ABC			0.61	0.00	2
			K.VFLMDEPLSNLDAK.L	1646.859	0.61		2
			K.VFLM(15.995)DEPLSNLDAK.L	536.3032	0.00		2
WP_009903205.1	sn-glycerol-3-phosphate ABC transporter ATP-binding protein UgpC	sn-glycerol-3-phosphate			0.61	0.00	2
			K.VFLMDEPLSNLDAK.L	1646.859	0.61		2
			K.VFLM(15.995)DEPLSNLDAK.L	536.3032	0.00		2
WP_003420711.1	2-oxoacid:acceptor oxidoreductase family protein	2-oxoacid:acceptor			0.62	0.21	23
			K.EVSWLPSYGPEMR.G	1577.7548	0.92		2
			K.GMDATCSK.A	924.4045	0.52		2
			K.IIVNSSLIK.E	1041.6798	0.99		2
			K.VANMIMLGAYLK.V	1378.7717	0.61		2
			K.VSDTVDIESVLEAFKK.V	1864.0275	0.62		3
			K.EVSWLPSYGPEM(15.995)R.G	1421.6537	0.00		2
			K.EVSWLPSYGPEM(15.995)R.G	1421.6537	0.00		3
			K.FKDDVIPGGK.I	1158.6649	0.00		2
			K.VSDTVDIESVLEAFK.K	1706.8978	0.00		2
WP_003433741.1	AIM24 family protein	AIM24			0.64	0.00	2
			K.GTGEVYLEPSFR.H	1381.6878	0.64		2
			K.LSFGAMPTNDNMNNK.V	1708.7913	0.00		2
			K.LSFGAMPTNDNMNNKVSK.Q	2052.0213	0.00		2
WP_003436882.1	aminoacyl-histidine dipeptidase	aminoacyl-histidine			0.75	0.11	2
			K.ESTIEFLTSVR.S	1308.6925	0.67		2
			K.TCVVSLPVEYK.E	1349.7265	0.83		2
WP_009901675.1	response regulator transcription factor	response			0.77	0.00	2
			R.NKIEDNPENPK.I	1380.7249	0.77		2
			K.NGFSVDVAR.T	991.5087	0.00		2
			R.NKIEDNPENPK.I	1380.7249	0.00		3
			R.TVEEALQIYK.E	1248.6966	0.00		2
WP_009902544.1	3-methyl-2-oxobutanoate hydroxymethyltransferase	3-methyl-2-oxobutanoate			0.77	0.00	2
			K.QYANIGDIMK.D	1207.6271	0.77		2
			K.AGAFSIVLEGVPTK.I	1443.8337	0.00		2
			K.AGAFSIVLEGVPTK.I	1443.8337	0.00		3
			K.NYILEVNTGTFPQEK.H	1808.939	0.00		2
WP_009896932.1	response regulator transcription factor	response			0.79	0.23	2
			R.EGYEIVEAGTGR.E	1307.6357	1.08		2
			R.ENFDQVGIIMLTAK.A	1633.8749	0.62		2
			R.SFVSINLK.R	962.5801	0.79		2
			K.EIELTPTEFSIVK.Y	1560.8651	0.00		2
			K.SSEIVSPPFILDIDKR.K	1872.0438	0.00		3
			K.YIQTIWGYGYCFR.K	1754.832	0.00		2
			K.YLISNAK.Q	863.5117	0.00		2
			R.NKIEDDPSKPK.Y	1381.7817	0.00		3
WP_009902635.1	alpha/beta hydrolase	alpha/beta			0.81	0.00	2
			K.ALVPLYAENFR.C	1319.7238	0.81		2
WP_003417090.1	trigger factor	trigger			0.82	0.04	2
			K.VENTVSDENVDAK.L	1474.7151	0.85		2
			R.IVIETQYGK.G	1105.6383	0.79		2
			K.SSLVLEAITK.A	1115.6802	0.00		2
WP_003431186.1	bifunctional pyr operon transcriptional regulator/uracil phosph	bifunctional			0.82	0.00	2
			K.TVVLVDDVLYTGR.T	1476.8188	0.82		2
			K.GTYLDFNVNDK.T	1340.6612	0.00		2
WP_003426450.1	adenine phosphoribosyltransferase	adenine			0.83	0.65	23
			K.LSNYDVNSLIK.Y	1320.7289	1.01		2
			K.LSNYDVNSLIKY.-	1483.7922	2		2
			K.VAIVDDLLATGGTMEAAAK.L	1902.0213	0.6		2
			K.VAIVDDLLATGGTMEAAAK.L	1902.0213	0.65		3
			K.DVTTLFK.D	878.5113	0.00		2
			K.LPGEVESYEYGLEYGTDTLEIHK.D	2698.3095	0.00		3
			K.VAIVDDLLATGGTM(15.995)EAAAK.L	1402.7378	0.00		2
			K.VAIVDDLLATGGTM(15.995)EAAAK.L	1402.7378	0.00		3
WP_004454415.1	helix-turn-helix domain-containing protein	helix-turn-helix			0.84	0.00	2
			R.GLANPSVNSLK.S	1154.6659	0.84		2
WP_009902285.1	transglutaminase domain-containing protein	transglutaminase			0.85	0.00	2
			K.TQNPTPTVK.K	1040.5866	0.85		2
			K.SAGADIIYK.S	992.5543	0.00		2
			K.SYVAGTNSIYGPK.L	1411.7347	0.00		2
WP_003420839.1	redox-sensing transcriptional repressor Rex	redox-sensing			0.86	0.16	23
			K.ELSDIIGFTASQIR.Q	1576.8461	0.77		2
			K.ELSDIIGFTASQIR.Q	1576.8461	0.81		3
			K.NGAQEVINR.V	1027.5411	1.01		2
			K.NISMAVIR.R	930.5321	1.03		2
			K.NNNIDIAVLCIPK.N	1538.8491	0.9		2
			R.QDLNNFGGFGQQGYGYNVEALHTEIGK.I	3012.4447	0.62		3
			K.ALFDANPR.M	930.4923	0.00		2
			R.YLGDLLDR.D	991.5338	0.00		2
WP_003437535.1	NAD(+) synthase	NAD(+)			0.86	0.23	2
			K.FGDGGVDILPIANLTK.G	1684.94	0.69		2
			K.TVEWLINK.V	1057.6172	1.02		2
			K.GEVYEWAK.E	1036.523	0.00		2
WP_004454137.1	MBL fold metallo-hydrolase	MBL			0.86	0.19	23
			K.VVAHVDEK.E	951.5389	1		2
			R.TDLYSGDFNQMEK.S	1602.7236	1.07		2
			R.VEDEMFTGDTLFAGSIGR.T	1972.9282	0.73		2
			R.VEDEMFTGDTLFAGSIGR.T	1972.9282	0.69		3
			K.CAVIDPGGSLVETLSFVK.E	1948.0421	0.00		2
			K.FVDSYFGVNTYVLGDEK.T	2008.9863	0.00		2
			K.NLSYTM(15.995)R.C	755.3524	0.00		2
			K.NLSYTMR.C	911.4535	0.00		2
			R.TDLYSGDFNQM(15.995)EK.S	1317.5547	0.00		2
			R.VEDEM(15.995)FTGDTLFAGSIGR.T	649.2629	0.00		2
			R.VEDEM(15.995)FTGDTLFAGSIGR.T	649.2629	0.00		3
			R.VYPGHGPTSTLGVEK.K	1596.8512	0.00		3
WP_004454497.1	sugar O-acetyltransferase	sugar			0.87	0.00	2
			K.DIPSNMIAYGNPCR.I	1634.7545	0.87		2
			K.DIPSNM(15.995)IAYGNPCR.I	703.3211	0.00		2
			K.DIPSNMIAYGNPCRIIR.E	2018.0271	0.00		2
			R.DYNQTDSSDLEK.K	1469.6522	0.00		2
WP_009897939.1	glycosyl transferase	glycosyl			0.87	0.00	2
			K.EVLTSSLFTIPK.I	1389.8119	0.87		2
			K.DITPLLENNR.L	1211.651	0.00		2
WP_003435191.1	hypothetical protein	hypothetical			0.88	0.07	2
			K.CQYLLIGEK.R	1178.6369	0.83		2
			K.VAFILEK.N	874.5528	0.93		2
			K.EISSTSLNK.V	1033.5655	0.00		2
			K.LYFEIPAEVTLK.L	1477.8432	0.00		2
			R.HYNFNCTLK.E	1251.607	0.00		2
WP_003437174.1	NfeD family protein	NfeD			0.88	0.00	2
			K.KVDATVNVTNQ.-	1243.6772	0.88		2
WP_003437218.1	alpha/beta hydrolase	alpha/beta			0.88	0.00	2
			K.AYFISPIVNMEK.L	1466.7843	0.88		2
			K.QTNATLTVMR.N	1161.6176	0.00		2
WP_003437730.1	precorrin-6A reductase	precorrin-6A			0.88	0.00	3
			K.IIDATHPYAVEVSK.T	1597.8716	0.88		3
			K.NQPYILSVTTDYGR.E	1653.8362	0.00		2
			R.VLPTSEVILSCEK.L	1529.8375	0.00		2
WP_003438808.1	4-hydroxy-tetrahydrodipicolinate reductase	4-hydroxy-tetrahydrodipicolinate			0.88	0.14	2
			K.EVLPNVENNYGR.Y	1430.7154	0.86		2
			R.GIFASGSIAAAK.Y	1147.6601	1.12		2
			R.GLDSYEGDLK.I	1151.571	0.88		2
			K.TPLVIATTGYNDDEMNK.I	1937.9486	0.00		2
			K.TPLVIATTGYNDDEMNK.I	1937.9486	0.00		3
			K.VIATGYDGK.M	978.5386	0.00		2
			R.KVDAPSGTAVMIANAIK.E	1769.0121	0.00		3
WP_004454042.1	serine dehydratase subunit alpha family protein	serine			0.88	0.02	2
			K.ELLGEEIVENR.M	1327.6983	0.89		2
			K.TGIGVGYGIK.K	1019.6015	0.86		2
			K.DGEVLLDNEPK.V	1283.6609	0.00		2
			K.IAEDYM(15.995)DNTPLSITPADTR.E	768.3364	0.00		2
			K.IAEDYMDNTPLSITPADTR.E	2151.0235	0.00		2
			K.MNEEMAEYGLK.Q	1369.6258	0.00		2
WP_009889131.1	peptidylprolyl isomerase	peptidylprolyl			0.88	0.00	2
			K.DMGGDLGTFGR.G	1152.5234	0.88		2
			K.HILVDSDEK.A	1110.5921	0.00		2
			K.SEEISFEDAALK.H	1393.6977	0.00		2
			K.SLDPYQAMQFK.T	1382.6904	0.00		2
WP_009902717.1	radical SAM protein	radical			0.88	0.09	2
			-.MDRYSEITNK.N	1311.6493	0.88		2
			K.IGVETFDNYFR.N	1387.6772	0.88		2
			R.EYFEIPVVFK.I	1325.7271	0.72		2
			-.MDRYSEITNK.N	1311.6493	0.00		3
			K.YGVLEVINSGSCFELPK.D	1968.0108	0.00		2
			R.YSEITNK.N	909.4808	0.00		2
WP_003434936.1	SEC-C domain-containing protein	SEC-C			0.89	0.00	2
			K.VEAGIYNEILNNK.M	1531.8246	0.89		2
			K.VSELAEK.F	830.4749	0.00		2
			R.NLSDNHESQEAEVK.F	1654.7799	0.00		2
			R.NLSDNHESQEAEVK.F	1654.7799	0.00		3
WP_009898403.1	ImmA/IrrE family metallo-endopeptidase	ImmA/IrrE			0.89	0.1	2
			K.IAEYFNVSSYAASNR.G	1718.8264	0.82		2
			K.VIEDSSLSGYSDGFIR.K	1771.8629	0.96		2
			K.EYQSNEFAAALLMPK.H	1766.8913	0.00		2
WP_009902629.1	phospho-sugar mutase	phospho-sugar			0.89	0.00	2
			K.AYIFDSLR.T	1011.5389	0.89		2
			K.DLEFGTAGLR.G	1105.5768	0.00		2
WP_003416006.1	hypoxanthine phosphoribosyltransferase	hypoxanthine			0.9	0.06	2
			K.FIVGYGIDYAEK.Y	1429.7493	0.86		2
			K.GASVFVSDLIR.C	1190.6659	0.94		2
			K.DLDVDIEGK.N	1058.5496	0.00		2
			K.MLTEEQIKEK.V	1331.737	0.00		2
			K.MLTEEQIKEK.V	1331.737	0.00		3
WP_003420885.1	orotate phosphoribosyltransferase	orotate			0.9	0.15	23
			K.EAVFTER.K	878.4498	1.1		2
			K.EGKLPVVKPGSR.E	1349.8395	0.9		3
			K.IIIAEDVVTTGK.S	1313.7806	1.02		2
			R.EFKELGM.-	908.4677	0.99		2
			R.KDNTMELR.R	1061.5539	0.86		2
			R.VLEALGGEVVGVACIADR.T	1854.9873	0.71		2
			R.VLEALGGEVVGVACIADR.T	1854.9873	0.73		3
WP_003421190.1	transcription termination/antitermination factor NusG	transcription			0.9	0.18	23
			K.AMGIDTTDPK.V	1103.5533	0.9		2
			K.GVTGFVGPGSKPVPLSEDEVK.A	2183.1919	0.98		3
			K.MIITDESWYVVR.N	1538.7803	0.81		2
			K.VCINAFGK.R	963.5212	1		2
			K.VSQGPFSGQIGNIEEIDLENR.E	2330.1584	0.78		2
			K.VVNSDIDFEIGDTVK.V	1705.8774	0.69		2
			K.VYPSYVLVK.M	1122.6689	0.97		2
			R.GMEDCIR.Q	907.3892	1.08		2
			R.KVYPSYVLVK.M	1278.7951	0.87		2
			R.QVVVPTEEVVETTK.T	1612.8924	1.01		2
			R.TLFVIELEGIEKI.-	1558.9222	0.47		2
			K.AM(15.995)GIDTTDPK.V	248.1195	0.00		2
			K.GVTGFVGPGSK.P	1060.5917	0.00		2
			K.GVTGFVGPGSKPVPLSEDEVK.A	2183.1919	0.00		2
			K.VSQGPFSGQIGNIEEIDLENR.E	2330.1584	0.00		3
			R.KVYPSYVLVK.M	1278.7951	0.00		3
WP_003436400.1	FAD-dependent oxidoreductase	FAD-dependent			0.9	0.05	2
			R.ANTQMVQDTSVK.I	1376.697	0.86		2
			R.LGVAVDGIEGDGK.A	1284.6925	0.93		2
			K.GDFEDIMK.A	1009.479	0.00		2
			K.TLVTCDSFGSHYSNDK.I	1885.8516	0.00		3
			R.ANTQM(15.995)VQDTSVK.I	591.2687	0.00		2
WP_009895182.1	proline--tRNA ligase	proline--tRNA			0.9	0.13	2
			K.DIENNQAMVFR.R	1363.6554	1		2
			R.VAPIQVVIVPIAAK.K	1472.9694	0.81		2
			K.DIENNQAM(15.995)VFR.R	961.4175	0.00		2
			K.TMWCGDAECEAK.I	1512.6047	0.00		2
			R.LIGGLIMTHSDNR.G	1453.7711	0.00		3
WP_011860916.1	translation initiation factor IF-3	translation			0.9	0.08	23
			K.APAFEGNNMVVIIDPK.K	1769.9386	0.8		2
			K.APAFEGNNMVVIIDPK.K	1769.9386	0.74		3
			K.EAQAMANSK.N	1004.4961	0.9		2
			K.EFGEPTK.A	862.4436	0.97		2
			K.NLDLVQISPNANPPVCK.I	1935.0329	0.89		2
			K.NLDLVQISPNANPPVCK.I	1935.0329	0.9		3
			R.LRPGIEQNDLNTK.A	1552.8573	0.99		2
			R.LRPGIEQNDLNTK.A	1552.8573	0.96		3
			R.VLSPTGEQLGVMPTK.E	1611.8906	0.96		2
			R.VLSPTGEQLGVMPTK.E	1611.8906	0.91		3
			K.APAFEGNNM(15.995)VVIIDPK.K	977.4277	0.00		2
			K.APAFEGNNM(15.995)VVIIDPK.K	977.4277	0.00		3
			K.ELAINEQIKDKEIR.V	1782.0251	0.00		4
			R.VLSPTGEQLGVM(15.995)PTK.E	1257.6639	0.00		2
			R.VLSPTGEQLGVM(15.995)PTK.E	1257.6639	0.00		3
WP_003428474.1	FprA family A-type flavoprotein	FprA			0.91	0.00	2
			K.VILLGSPTINK.T	1209.7697	0.91		2
			K.DGEILNIGK.R	1013.5757	0.00		2
			K.HVLSAVDK.V	923.544	0.00		2
			K.IDYVVIHHTEPDHAGSLK.Y	2087.0881	0.00		5
			K.YLLDINPNIEVYCTK.A	1910.9893	0.00		2
WP_003429271.1	PLP-dependent aminotransferase family protein	PLP-dependent			0.91	0.51	2
			K.MIYVIPDFQNPTGR.T	1677.8549	0.91		2
			R.MQGLQGSEIR.E	1145.5863	0.14		2
			R.SAMQYTTTEGYEPLR.E	1773.8244	1.1		2
			K.M(15.995)IYVIPDFQNPTGR.T	177.0824	0.00		2
			K.NVAYVAGGGFFPNGGR.E	1609.8001	0.00		2
			K.QGADLQASTISQMEVSK.F	1847.9299	0.00		2
			R.SAMQYTTTEGYEPLREK.I	2059.9966	0.00		3
WP_003434107.1	MetQ/NlpA family ABC transporter substrate-binding protein	MetQ/NlpA			0.91	0.01	23
			K.EMNAEQLPTVLK.D	1427.7694	0.92		2
			K.ILVGASSNPHAK.I	1248.719	0.9		3
			K.ALSEAMNSK.E	1005.5165	0.00		2
			K.DGAVIAVPNDATNGAR.A	1567.7954	0.00		2
			K.EM(15.995)NAEQLPTVLK.D	306.1249	0.00		2
			K.VHIEPMGFYSEK.V	1491.7432	0.00		3
WP_003439345.1	deoxyribose-phosphate aldolase	deoxyribose-phosphate			0.91	0.14	23
			K.ATTTWEDIK.I	1119.5812	0.98		2
			K.ILKNEDTTDY.-	1266.6344	0.84		2
			K.TSTGMGTGGATLEDIK.L	1593.792	1.07		2
			K.VIIETCYLDEDEKIK.M	1952.0257	0.76		3
			K.ICTVIGFPLGYQTTATK.V	1926.0366	0.00		2
			K.ICTVIGFPLGYQTTATK.V	1926.0366	0.00		3
			K.MCEIVTM(15.995)SGSDFIK.T	910.3962	0.00		2
			K.MCEIVTMSGSDFIK.T	1672.7874	0.00		2
			K.NKDYDNIGK.E	1149.603	0.00		2
			K.TSTGM(15.995)GTGGATLEDIK.L	523.2312	0.00		2
			K.TVDHTILK.A	981.5859	0.00		2
WP_009902665.1	PepSY domain-containing protein	PepSY			0.91	0.00	2
			K.FVYTVEGVDDNNEYK.M	1847.8659	0.91		2
			K.DADIVDLSLER.D	1272.6562	0.00		2
			K.EANASNNALKDEK.N	1486.7627	0.00		3
contaminant_KERATIN17	no description	no			0.91	0.16	23
			K.NKYEDEINKR.T	1391.7409	0.91		3
			K.YEELQQTAGR.H	1221.599	0.98		2
			R.KLLEGEECR.L	1188.6173	0.91		2
			R.NLDLDSIIAEVK.A	1384.7814	0.79		2
			R.VSLAGACGVGGYGSR.S	1437.7035	1.21		2
			K.AQYEEIANR.S	1120.5513	0.00		2
			K.NKYEDEINKR.T	1391.7409	0.00		2
			R.QLDSIVGER.G	1043.5611	0.00		2
			R.TEAESWYQTK.Y	1297.619	0.00		2
contaminant_KERATIN21	no description	no			0.91	0.08	23
			K.AQYEEIAQR.S	1134.5669	0.99		2
			K.NKYEDEINKR.T	1391.7409	0.91		3
			R.KLLEGEECR.L	1188.6173	0.91		2
			R.NLDLDSIIAEVK.A	1384.7814	0.79		2
			K.ADTLTDEINFLR.A	1434.7355	0.00		2
			K.NKYEDEINKR.T	1391.7409	0.00		2
			R.AIGGGLSSVGGGSSTIK.Y	1502.8304	0.00		2
			R.QLDSIVGER.G	1043.5611	0.00		2
WP_003422204.1	transcription elongation factor GreA	transcription			0.92	0.18	23
			K.EVVEVQVPDGVAK.F	1423.7922	1.05		2
			K.EVVEVQVPDGVAK.F	1423.7922	0.86		3
			K.FEILEIR.R	946.5488	1.06		2
			K.IDLNVVTIGSIVK.V	1425.8807	0.63		2
			K.ISNESPVGK.A	985.5444	0.92		2
			K.AVIIDESK.I	929.5434	0.00		2
			K.VAISFGDLSENAEYDEAK.K	2013.9612	0.00		2
			K.VAISFGDLSENAEYDEAKK.E	2170.0875	0.00		3
WP_003437840.1	uracil phosphoribosyltransferase	uracil			0.92	0.08	23
			K.DIPLKDVEIETPIQK.T	1822.0533	0.92		3
			K.LAIIPILR.A	935.6532	1.04		2
			K.LANLVAAPEGIAEVQK.Y	1677.9665	0.94		2
			K.LANLVAAPEGIAEVQK.Y	1677.9665	0.91		3
			K.VVETNHPLIQHK.L	1469.8355	0.92		2
			K.VVETNHPLIQHK.L	1469.8355	0.88		3
			R.AGLGMVDGLVSLMPAAK.V	1684.9256	0.73		2
			R.DPETLKPVEYYCK.L	1724.8695	0.9		3
			R.LNEHGYIIPGLGDAGDR.L	1823.9166	0.98		3
			K.YHDDVDIYVASVDER.L	1822.8374	0.00		2
			R.AGLGM(15.995)VDGLVSLM(15.995)PAAK.V	475.2465	0.00		3
			R.AGLGM(15.995)VDGLVSLMPAAK.V	475.2465	0.00		2
			R.AGLGMVDGLVSLM(15.995)PAAK.V	1289.6723	0.00		2
			R.AGLGMVDGLVSLM(15.995)PAAK.V	1289.6723	0.00		3
			R.DPETLKPVEYYCK.L	1724.8695	0.00		2
			R.LNEHGYIIPGLGDAGDR.L	1823.9166	0.00		2
WP_004454825.1	recombination regulator RecX	recombination			0.92	0.12	2
			K.IVNTNVNLNK.C	1183.6925	0.92		2
			K.LLNFDEYDI.-	1168.5652	0.89		2
			K.LSSEFDENIIER.V	1478.7253	1.11		2
			K.SYNLVNDSVLAQK.I	1505.809	0.00		2
WP_009890640.1	DUF4342 domain-containing protein	DUF4342			0.92	0.14	2
			K.ETMEEVFGK.D	1124.5424	0.71		2
			K.NMITNAAK.D	917.5004	0.98		2
			R.VPGATYAEAK.E	1061.5757	0.92		2
			K.DVKDVVVDKK.E	1255.7751	0.00		3
			K.ETM(15.995)EEVFGK.D	407.1726	0.00		2
			K.ETMEEVFGKDGENIK.F	1808.8866	0.00		2
			K.ETMEEVFGKDGENIK.F	1808.8866	0.00		3
WP_009895920.1	GntR family transcriptional regulator	GntR			0.92	0.47	23
			K.KIQNGEYEANQR.I	1504.7634	0.81		3
			R.ENDLENVER.V	1144.536	1.68		2
			R.LAGENLLEK.I	1041.607	0.92		2
			K.LSNEFHDIYITK.S	1534.8031	0.00		3
			K.MLTYSNNQHIEVVK.S	1730.9025	0.00		3
			R.YNFMSK.S	844.4153	0.00		2
WP_009902455.1	LamB/YcsF family protein	LamB/YcsF			0.92	0.00	3
			K.ADSICVHGDNPK.A	1367.6504	0.92		3
WP_009903196.1	ribosome-associated translation inhibitor RaiA	ribosome-associated			0.92	0.07	2
			-.MQIIVSGR.Q	930.5321	0.85		2
			K.AGGYGLIEQD.-	1049.5029	1		2
			K.YLDPESEVK.V	1134.5809	0.92		2
			R.KAGGYGLIEQD.-	1205.6292	0.93		2
			R.NQDNFEINIVYK.R	1551.7933	0.81		2
			K.VEVTIIPINGQIIR.A	1591.9661	0.00		2
			R.AEDVEDDLYAAIDIVCDK.L	2109.9857	0.00		3
			R.QKVEVTIIPINGQIIR.A	1877.1543	0.00		3
WP_009903328.1	cell wall-binding protein Cwp10	cell			0.92	0.00	2
			K.ETQESGSNVILK.L	1359.7246	0.92		2
			K.DGVDNEAEQFIK.S	1419.6882	0.00		2
			K.GTSDKPALK.I	999.5964	0.00		2
			K.VQGEVEVVDNEQK.E	1527.7781	0.00		2
			K.VQGEVEVVDNEQKEK.I	1812.9469	0.00		3
WP_009903721.1	DJ-1/PfpI family protein	DJ-1/PfpI			0.92	0.00	2
			K.VLVFLAK.G	844.5786	0.92		2
			K.EQMDEVK.L	933.4477	0.00		2
			K.NIITSYCPETAPHVAFK.L	2004.022	0.00		3
			R.QLSEFDVNVVNEPIVVDK.N	2100.1184	0.00		2
WP_011861621.1	peptidoglycan editing factor PgeF	peptidoglycan			0.92	0.13	2
			K.EGSYYLDLWK.I	1328.6653	0.83		2
			R.DGDALITNLEK.V	1243.666	1.02		2
			K.FNTILTNNDEK.F	1363.6983	0.00		2
			R.GTFSNIGHK.T	1015.5451	0.00		2
WP_003419125.1	enoyl- enoyl-	enoyl-			0.93	0.04	23
			K.AKDRDAIVTGR.S	1256.7201	0.98		3
			K.VIPVVPTIALAQR.M	1403.8864	0.9		2
			K.VQVITTGAGNPAK.Y	1310.7558	0.93		2
			R.FICSEECSVHSNYK.N	1814.7968	0.00		3
WP_003438917.1	hypothetical protein	hypothetical			0.93	0.11	2
			K.VKDSVLETTTK.I	1303.7599	0.85		2
			K.VNVVQDTLK.C	1070.6336	1.01		2
			K.EINEQEDLSTSK.V	1447.7042	0.00		2
			K.TVEDTNSNSIK.C	1262.6354	0.00		2
WP_004454633.1	xanthine phosphoribosyltransferase	xanthine			0.93	0.15	23
			K.GFQAGGALLK.A	1016.6019	1.11		2
			K.NLDKDVYETNVYSFTK.A	2020.0234	0.8		3
			R.EGSVSGNDILK.V	1173.6241	0.93		2
			R.LESLAVVESIDNGTVK.F	1728.9509	1.07		2
			R.LESLAVVESIDNGTVK.F	1728.9509	0.8		3
			K.GENILIVDDFLANGR.A	1672.8784	0.00		2
			K.NLDKDVYETNVYSFTK.A	2020.0234	0.00		2
WP_009894741.1	hypothetical protein	hypothetical			0.93	0.00	2
			R.YIIGAPLIGQIGK.N	1397.8646	0.93		2
			K.AVQLDMGGK.I	973.5267	0.00		2
WP_009897856.1	ABC transporter permease	ABC			0.93	0.00	2
			K.LQEPSLK.H	869.5222	0.93		2
			K.HIFGTDELGR.D	1171.5986	0.00		2
			K.HIFGTDELGRDYFSR.A	1840.8938	0.00		3
WP_009901929.1	ABC transporter ATP-binding protein	ABC			0.93	0.23	23
			K.GDFVSIVGASGSGK.S	1335.7034	1.2		2
			K.NSEEIVDLLNLSNKR.F	1798.9789	0.75		3
			R.IVTMEDGVIVSEK.V	1474.7953	0.93		2
			K.VTALNNVNLSVQK.G	1454.8457	0.00		2
			R.FNQTILLITHDEK.I	1626.8981	0.00		3
			R.IVTM(15.995)EDGVIVSEK.V	490.2825	0.00		2
			R.SLIYRPAILLADEPTGNLDR.K	2255.2355	0.00		3
WP_009901935.1	response regulator transcription factor	response			0.93	0.13	2
			K.AYLDNVEVPLTAGEYK.L	1837.9543	0.84		2
			K.LLLSLMENK.N	1115.6624	1.02		2
			K.NHTVCCYNTIAEAK.K	1735.8022	0.00		3
WP_009903387.1	hypothetical protein	hypothetical			0.93	0.01	2
			K.IDESPIPLGYFK.D	1433.7806	0.94		2
			K.YLLINPVAER.M	1214.7023	0.92		2
			K.EFAEQEGVK.S	1091.5499	0.00		2
			K.KTENTMLDCR.C	1322.6323	0.00		2
			K.VLEVSSEDEILSEIQK.I	1873.9966	0.00		2
WP_003416253.1	zinc metallopeptidase	zinc			0.94	0.12	23
			R.AIVQLGNLGIIDESESR.Q	1840.9894	0.79		2
			R.GHLSDHYDPR.R	1223.5683	1		2
			R.GHLSDHYDPR.R	1223.5683	1.05		3
			R.VLDSNGLYDVK.I	1277.6867	0.87		2
			K.GYAPLQIR.S	944.5444	0.00		2
WP_003419111.1	DUF177 domain-containing protein	DUF177			0.94	0.00	2
			K.VLCSENCK.G	1064.4995	0.94		2
			K.LVSPVNLK.G	924.6008	0.00		2
WP_003421173.1	50S ribosomal protein L3	50S			0.94	0.13	234
			K.ADVFEAGAK.I	962.5073	0.97		2
			K.DGYNAIQIGFEDAK.E	1595.7831	1.4		2
			K.EFRVDSVEGYTVGQEIK.A	2012.0296	0.87		2
			K.EFRVDSVEGYTVGQEIK.A	2012.0296	0.88		3
			K.GFQGPIKR.H	957.576	1.01		2
			K.GKGFQGPIK.R	1014.6226	0.95		2
			K.GKGFQGPIKR.H	1170.7237	0.94		2
			K.GVVIPVTAVEAGPM(15.995)VVTQIK.T	1366.753	0.89		2
			K.GVVIPVTAVEAGPMVVTQIK.T	2064.2098	0.71		2
			K.GVVIPVTAVEAGPMVVTQIK.T	2064.2098	0.71		3
			K.IDVTGISK.G	887.5328	0.94		2
			K.KVGMTQIFTDK.G	1350.7581	0.91		2
			K.KVGMTQIFTDK.G	1350.7581	0.98		3
			K.LAGHMGSVK.V	954.5321	0.9		2
			K.TVDKDGYNAIQIGFEDAK.E	2068.0558	0.94		3
			K.TVDKDGYNAIQIGFEDAKEK.A	2353.2247	0.86		3
			K.TVDKDGYNAIQIGFEDAKEK.A	2353.2247	0.72		4
			K.VDADKNLILVK.G	1310.8173	0.92		2
			K.VDADKNLILVK.G	1310.8173	0.92		3
			K.VGMTQIFTDK.G	1194.6318	0.99		2
			K.VTVQNLEVVK.V	1183.7176	1		2
			P.GSMGACSYPGR.V	1169.4958	1		2
			R.RPGSMGACSYPGR.V	1422.6496	0.96		2
			R.RPGSMGACSYPGR.V	1422.6496	0.98		3
			R.VDSVEGYTVGQEIK.A	1578.8141	1.01		2
			R.VDSVEGYTVGQEIK.A	1578.8141	1		3
			K.DGYNAIQIGFEDAKEK.A	1881.9554	0.00		3
			K.GVVIPVTAVEAGPM(15.995)VVTQIK.T	1366.753	0.00		3
			K.HLKEFR.V	884.5232	0.00		2
			K.KGHLAAANVLK.K	1204.7656	0.00		3
			K.KLAGHMGSVK.V	1110.6583	0.00		2
			K.KVGM(15.995)TQIFTDK.G	489.2985	0.00		2
			K.TVDKDGYNAIQIGFEDAK.E	2068.0558	0.00		2
			K.VGM(15.995)TQIFTDK.G	333.1722	0.00		2
			R.RPGSM(15.995)GACSYPGR.V	574.2897	0.00		2
			R.RPGSM(15.995)GACSYPGR.V	574.2897	0.00		3
WP_003421194.1	NYN domain-containing protein	NYN			0.94	9.55	23
			K.TIIVFDAYNVK.N	1337.7595	0.89		2
			K.VATNDYAEQQMILGK.G	1735.8815	0.98		2
			R.EHQTADSYIEK.F	1375.662	0.86		3
			R.KHITIVYTR.E	1185.7234	20		3
			R.EHQTADSYIEK.F	1375.662	0.00		2
WP_003438086.1	FadR family transcriptional regulator	FadR			0.94	0.1	2
			K.IIAEPFNENILLK.Q	1568.9178	0.93		2
			R.VLETMGVIESR.Q	1260.6748	1.1		2
			R.VLVLLDQK.F	982.6427	0.94		2
			K.HIIDEMR.V	940.48	0.00		2
			R.ELSEQMNVSR.T	1219.5867	0.00		2
WP_004453642.1	superoxide reductase	superoxide			0.94	0.00	2
			K.CLAVDGEPVVK.F	1241.669	0.94		2
			K.ELVPNTTDAAVEK.H	1441.7664	0.00		2
WP_009888867.1	electron transfer flavoprotein subunit beta/FixA family pro	electron			0.94	0.19	23
			K.DIEVDPSNLGLK.G	1354.7344	1.05		2
			K.GSPTSVFK.S	877.4909	1		2
			K.QVPDTTEVK.L	1071.5812	0.89		2
			K.SVKPAGTIYNEDAK.T	1575.8508	1.23		3
			R.AFAGADTWATSSALAGALK.N	1864.9764	0.75		2
			R.AFAGADTWATSSALAGALK.N	1864.9764	0.74		3
			K.QVPDTTEVKLDPNTGTLIR.D	2153.1773	0.00		3
			K.SVKPAGTIYNEDAK.T	1575.8508	0.00		2
			R.IYDAFENDVVETWTVK.D	1984.9863	0.00		2
			R.QFEDCCHDLK.V	1406.5959	0.00		2
			R.QFEDCCHDLK.V	1406.5959	0.00		3
WP_009889371.1	NADH peroxidase	NADH			0.94	0.14	234
			K.AFLGLLNR.H	930.5651	1.03		2
			K.ELGLDAIHDTVHEMCKDEAR.H	2395.1341	0.75		3
			K.ELGLDAIHDTVHEMCKDEAR.H	2395.1341	1.02		4
			K.FVCTVCGYIHEGDAAPAQCPVCK.V	2695.2096	0.78		3
			K.GEMVWADEHR.I	1256.5608	1.06		2
			K.GEMVWADEHR.I	1256.5608	1.08		3
			R.EGYPEVAEAYK.R	1310.6394	0.93		2
			R.EGYPEVAEAYKR.I	1466.7405	1.01		3
			R.IAFEEAEHAAK.F	1270.6558	0.94		2
			R.IAFEEAEHAAK.F	1270.6558	0.94		3
			R.IGVAQGVDAEIIEGLR.A	1666.9254	0.65		2
			R.IGVAQGVDAEIIEGLR.A	1666.9254	0.66		3
			R.QADREGYPEVAEAYK.R	1780.8632	1.05		3
			R.VDAEYGATDGK.L	1180.5612	0.88		2
			R.VRVDAEYGATDGK.L	1435.7307	0.93		2
			R.VRVDAEYGATDGK.L	1435.7307	0.95		3
			K.FAELLGEVVVADTK.E	1545.8654	0.00		2
			K.FAELLGEVVVADTK.E	1545.8654	0.00		3
			K.FAELLGEVVVADTKENLR.V	2059.1395	0.00		2
			K.FAELLGEVVVADTKENLR.V	2059.1395	0.00		3
			K.GEM(15.995)VWADEHR.I	363.1464	0.00		3
			K.VGADKFEEM(15.995)K.G	1080.5162	0.00		2
			K.VGADKFEEMKGEMVWADEHR.I	2448.1647	0.00		4
			R.AKELGLDAIHDTVHEMCKDEAR.H	2622.2975	0.00		5
			R.ANFTGECTEVGM(15.995)YLAM(15.995)SR.Q	1342.5533	0.00		2
			R.ANFTGECTEVGM(15.995)YLAMSR.Q	1342.5533	0.00		2
			R.ANFTGECTEVGMYLAMSR.Q	2064.9148	0.00		2
			R.ANFTGECTEVGMYLAMSR.Q	2064.9148	0.00		3
			R.EGYPEVAEAYKR.I	1466.7405	0.00		2
			R.QADREGYPEVAEAYK.R	1780.8632	0.00		2
			R.QADREGYPEVAEAYKR.I	1937.9677	0.00		3
			R.QADREGYPEVAEAYKR.I	1937.9677	0.00		4
WP_009890358.1	alpha/beta hydrolase	alpha/beta			0.94	9.54	23
			K.AFYIYNQGENWEK.V	1716.8148	0.94		2
			K.VILIDFVGHGK.S	1252.7543	0.88		3
			K.VVDNDTEAIFEHYK.T	1734.8465	20		2
			K.VVDNDTEAIFEHYK.T	1734.8465	0.95		3
			K.M(15.995)FNDIIDFYK.D	177.0824	0.00		2
WP_009891694.1	TSUP family transporter	TSUP			0.94	0.01	23
			K.EGKLEEQSTPK.V	1328.7188	0.93		2
			K.EGKLEEQSTPK.V	1328.7188	0.94		3
			K.FIKEDAYTK.K	1197.6645	0.00		2
			K.FIKEDAYTK.K	1197.6645	0.00		3
WP_009892314.1	sulfurtransferase-like selenium metabolism protein YedF	sulfurtransferase-like			0.94	0.1	23
			K.GFIYTLTESKPYPK.Y	1727.9579	0.83		3
			K.LSAENEETIENLK.I	1544.7934	0.86		2
			K.MGLGNDELGK.V	1088.5536	1.01		2
			K.YVLLVNGGVK.L	1116.6907	1.02		2
			K.ESELDNTCIFISSDK.M	1812.8452	0.00		2
			K.GFIYTLTESKPYPK.Y	1727.9579	0.00		2
			K.M(15.995)GLGNDELGK.V	177.0824	0.00		2
WP_009895177.1	2-C-methyl-D-erythritol 4-phosphate cytidylyltransferase	2-C-methyl-D-erythritol			0.94	0.00	2
			K.IVSDGTVQETPER.N	1457.7362	0.94		2
WP_009901871.1	thioesterase	thioesterase			0.94	0.00	2
			K.IVYELTLK.I	1033.6423	0.94		2
			K.LILFPYAGGGVSIFR.N	1636.9341	0.00		2
			R.ADFIIDETYVNENITK.L	1940.9812	0.00		2
			R.M(15.995)SETPINEFNTLLEK.I	177.0824	0.00		2
WP_009903260.1	HAD family hydrolase	HAD			0.94	0.08	2
			K.FVGIPFIYAK.Y	1209.7162	0.88		2
			K.LFDDIEDTLK.L	1263.6598	1		2
			K.LINPIYVGDTQGDANSAK.F	1932.0034	1.05		2
			R.SLMGLSFEEIANR.L	1493.7548	0.89		2
			K.LINPIYVGDTQGDANSAK.F	1932.0034	0.00		3
WP_009903412.1	SIS domain-containing protein	SIS			0.94	0.09	23
			K.SSNFGSSDFYK.Y	1293.5877	1.07		2
			K.TIAFTSNR.N	936.5029	1.12		2
			K.TMVDVMTTEMNAIR.C	1638.7779	0.92		2
			K.TMVDVMTTEMNAIR.C	1638.7779	0.95		3
			K.VIFMGVGK.S	905.5408	0.93		2
			K.YHPGGSLGEK.L	1099.5662	0.92		2
			K.DITILISNSGNSMEVVNCIK.Y	2263.1633	0.00		2
			K.TM(15.995)VDVM(15.995)TTEMNAIR.C	278.13	0.00		2
			K.TM(15.995)VDVMTTEM(15.995)NAIR.C	278.13	0.00		2
			K.TM(15.995)VDVMTTEMNAIR.C	278.13	0.00		2
			K.TM(15.995)VDVMTTEMNAIR.C	278.13	0.00		3
			K.TMVDVM(15.995)TTEM(15.995)NAIR.C	722.3343	0.00		2
			K.TMVDVM(15.995)TTEMNAIR.C	722.3343	0.00		2
			K.TMVDVMTTEM(15.995)NAIR.C	1184.5127	0.00		2
			K.VIFM(15.995)GVGK.S	536.3032	0.00		2
WP_009903761.1	cobalt-precorrin-8 methylmutase	cobalt-precorrin-8			0.94	0.08	2
			K.IFVLGNAPTALYK.V	1461.8595	0.88		2
			K.TDIPYIISK.G	1104.6431	1		2
			K.VMEMESEGR.L	1094.4736	1.02		2
			R.SMAAVEIAAK.E	1045.5842	0.88		2
			K.CLVADDETVK.L	1204.6009	0.00		2
			R.SM(15.995)AAVEIAAK.E	264.1144	0.00		2
WP_009903855.1	16S rRNA (guanine(527)-N(7))-methyltransferase RsmG	16S			0.94	0.03	23
			K.GPNANLELEESQK.A	1483.7518	0.96		2
			R.VLELDNITFIHGR.A	1553.8566	0.92		3
			K.HFLDSISAVK.N	1171.6601	0.00		2
			K.NGIEGFNIDTNDSMLEK.F	1952.9231	0.00		2
WP_003418513.1	rubrerythrin family protein	rubrerythrin			0.95	0.11	24
			K.CPVCDHPK.A	1067.4892	0.81		2
			K.DAAAGENYEWTDMYAK.F	1890.8175	0.96		2
			K.EGYNQIAAIFEETANNEKEHAK.L	2590.2745	0.73		4
			K.IAYLFEAVGK.I	1165.6747	0.97		2
			K.LLENLNEGK.I	1084.6128	0.95		2
			K.NLMAGFAGESEAR.N	1379.6504	1.07		2
			K.YTYYASK.A	950.4749	0.91		2
			K.DAAAGENYEWTDM(15.995)YAK.F	1499.5875	0.00		2
			K.NLM(15.995)AGFAGESEAR.N	404.2093	0.00		2
			R.NKYTYYASK.A	1220.6441	0.00		2
			R.NKYTYYASK.A	1220.6441	0.00		3
WP_003424711.1	sporulation transcription factor Spo0A	sporulation			0.95	0.12	23
			K.DGIEALDLVK.K	1127.6438	1.1		2
			K.ELYPSIAK.K	975.5641	0.95		2
			K.IIVLSAVGQDK.I	1197.7333	0.94		2
			K.IVLADDNKDFCQVLK.E	1862.0053	0.88		3
			R.HAIEVAWSR.G	1095.5825	1.18		2
			K.DGIEALDLVKK.T	1283.7701	0.00		2
			K.EYLSNEDDIDILGIAK.D	1863.9547	0.00		2
			K.VDTINQLFGYTVHNTK.G	1906.003	0.00		3
			R.GKVDTINQLFGYTVHNTK.G	2119.1507	0.00		3
			R.VTQVEPKPRPVQETQMTR.S	2180.1817	0.00		4
WP_003429806.1	XRE family transcriptional regulator	XRE			0.95	0.00	2
			K.TSCNNTLFQK.R	1267.6231	0.95		2
			K.NDIDTVAAHR.V	1138.5731	0.00		2
			K.NMTQEDVANK.L	1204.5758	0.00		2
WP_003431170.1	guanylate kinase	guanylate			0.95	0.03	2
			K.AAIMECLEK.G	1119.5668	0.96		2
			K.GLLLVVSGPSGAGK.G	1309.7969	1		2
			R.GTETEAEIEKR.F	1317.6776	0.94		2
			R.TGEVDGVNYFFISK.E	1630.8243	0.92		2
			K.AAIM(15.995)ECLEK.G	432.2406	0.00		2
			K.ELLKENDTIK.L	1285.7493	0.00		2
			K.ELLKENDTIK.L	1285.7493	0.00		3
			K.GQDVLLEIEM(15.995)QGAK.Q	1173.5951	0.00		2
			R.GTETEAEIEK.R	1161.5765	0.00		2
			R.GTETEAEIEKR.F	1317.6776	0.00		3
WP_003432265.1	cyclodeaminase/cyclohydrolase family protein	cyclodeaminase/cyclohydrolase			0.95	0.03	23
			K.MIDDDAECFLPLSK.A	1708.8052	0.91		2
			K.TEVDKLVEDGVK.I	1414.7919	0.96		3
			K.VACEVPLNIVR.V	1296.7224	0.95		2
			K.M(15.995)IDDDAECFLPLSK.A	177.0824	0.00		2
			K.YAEYEESVK.E	1172.5601	0.00		2
WP_003433947.1	4Fe-4S binding protein	4Fe-4S			0.95	0.22	2
			K.GSQLNQWPVQIK.L	1452.8089	1		2
			K.TLACGCPGSQSK.S	1320.6166	0.84		2
			R.EAAEYDEAAVK.A	1250.6031	0.57		2
			R.EVSNSTSISNDIVEIK.G	1789.9309	0.95		2
			R.MEVPCCGGIVNAVK.T	1588.7775	1.15		2
			K.LDEVDYAEK.L	1136.5601	0.00		2
WP_003416023.1	phosphate propanoyltransferase	phosphate			0.96	0.12	23
			-.MKLPIALSNK.H	1197.7519	1.04		2
			-.MKLPIALSNK.H	1197.7519	1.17		3
			K.APIKESGDIAGTPGVK.L	1622.9243	0.83		2
			K.APIKESGDIAGTPGVK.L	1622.9243	0.93		3
			K.EGVIVASR.H	857.4971	1		2
			K.ESGDIAGTPGVK.L	1185.6241	0.94		2
			K.FKPLSQPGQYACEEK.V	1865.9427	0.95		2
			K.FKPLSQPGQYACEEK.V	1865.9427	0.98		3
			K.LPIALSNK.H	910.5852	0.99		2
			K.LVGPAGEVEMK.E	1184.6475	0.99		2
			K.NGDLVELIVD.-	1113.5918	0.67		2
			R.ALVFENVLVR.A	1186.7074	0.9		2
			-.M(15.995)KLPIALSNK.H	177.0824	0.00		3
			K.FKPLSQPGQYACEEKVDLVGPK.G	2602.391	0.00		3
			K.FKPLSQPGQYACEEKVDLVGPK.G	2602.391	0.00		4
			K.LVGPAGEVEM(15.995)K.E	1028.5212	0.00		2
			R.AHTQVEISLADGFPLGVK.A	1938.0656	0.00		3
			R.ASDSFNLEM(15.995)HVDM(15.995)EEGNAAGVK.N	1040.4485	0.00		3
			R.ASDSFNLEM(15.995)HVDMEEGNAAGVK.N	1040.4485	0.00		3
			R.HIHM(15.995)SNEDAAK.F	564.2842	0.00		2
			R.HIHM(15.995)SNEDAAK.F	564.2842	0.00		3
			R.HIHMSNEDAAK.F	1307.6292	0.00		2
			R.HIHMSNEDAAK.F	1307.6292	0.00		3
WP_003419930.1	NADH peroxidase	NADH			0.96	0.11	234
			K.AFLGLLNR.Y	930.5651	1.03		2
			K.ELGLDAIHDTVHEMCKDEAR.H	2395.1341	0.75		3
			K.ELGLDAIHDTVHEMCKDEAR.H	2395.1341	1.02		4
			K.FVCTVCGYIHEGDAAPAQCPVCK.V	2695.2096	0.78		3
			K.NWADEHR.I	954.4308	1		2
			K.VGADKFEEMKGEK.N	1578.8327	0.74		3
			R.EGYPEVGEAYK.R	1296.6238	1.03		2
			R.IALEEAEHAAK.F	1236.6714	0.96		2
			R.IALEEAEHAAK.F	1236.6714	1		3
			R.IGVAQGVDEEIIEGLR.A	1724.9309	0.78		2
			R.IGVAQGVDEEIIEGLR.A	1724.9309	0.77		3
			R.QADREGYPEVGEAYK.R	1766.8475	0.98		3
			R.QADREGYPEVGEAYKR.I	1923.952	0.99		4
			R.VDAEYGATDGK.L	1180.5612	0.88		2
			R.VRVDAEYGATDGK.L	1435.7307	0.93		2
			R.VRVDAEYGATDGK.L	1435.7307	0.95		3
			K.AKELGLDAIHDTVHEMCKDEAR.H	2622.2975	0.00		5
			K.FAELLGEVVVADTK.E	1545.8654	0.00		2
			K.FAELLGEVVVADTK.E	1545.8654	0.00		3
			K.FAELLGEVVVADTKENLR.V	2059.1395	0.00		2
			K.FAELLGEVVVADTKENLR.V	2059.1395	0.00		3
			K.RIALEEAEHAAK.F	1392.7725	0.00		3
			K.VGADKFEEM(15.995)K.G	1080.5162	0.00		2
			K.VGADKFEEMKGEK.N	1578.8327	0.00		2
			R.ANFVGECTEVGM(15.995)YLAM(15.995)SR.Q	1340.5741	0.00		2
			R.ANFVGECTEVGM(15.995)YLAMSR.Q	1340.5741	0.00		2
			R.ANFVGECTEVGMYLAM(15.995)SR.Q	1818.7991	0.00		2
			R.ANFVGECTEVGMYLAMSR.Q	2062.9356	0.00		2
			R.EGYPEVGEAYKR.I	1452.7249	0.00		2
			R.EGYPEVGEAYKR.I	1452.7249	0.00		3
			R.QADREGYPEVGEAYK.R	1766.8475	0.00		2
			R.QADREGYPEVGEAYKR.I	1923.952	0.00		3
WP_003420710.1	MFS transporter	MFS			0.96	0.12	234
			K.NVEVEEVK.-	1000.5441	0.96		2
			K.TEGLQDTQTHYCPGCTHGIIHR.L	2609.1945	0.83		4
			K.YFNCDTQEAAHGR.A	1595.6787	0.98		2
			K.YFNCDTQEAAHGR.A	1595.6787	0.99		3
			R.APAAATGIK.R	854.5226	0.95		2
			R.DNMIPYYPLGNFK.N	1626.8116	0.88		2
			R.NAETQGYPIR.V	1175.5935	1.03		2
			R.VAVDTPAHVR.Q	1091.6087	1.01		2
			R.VHPENTVFTYQGDGDLASIGTAEIVHAAAR.G	3167.5717	0.63		4
			K.ITTIFVNNTTYGM(15.995)TGGQM(15.995)APTTLVGQR.A	1501.7487	0.00		3
			K.ITTIFVNNTTYGM(15.995)TGGQMAPTTLVGQR.A	1501.7487	0.00		3
			K.ITTIFVNNTTYGMTGGQM(15.995)APTTLVGQR.A	1976.9417	0.00		3
			K.KTEGLQDTQTHYCPGCTHGIIHR.L	2765.3207	0.00		4
			K.KTEGLQDTQTHYCPGCTHGIIHR.L	2765.3207	0.00		5
			K.TEGLQDTQTHYCPGCTHGIIHR.L	2609.1945	0.00		3
			K.TEGLQDTQTHYCPGCTHGIIHR.L	2609.1945	0.00		5
			R.DNM(15.995)IPYYPLGNFK.N	406.1522	0.00		2
			R.VHPENTVFTYQGDGDLASIGTAEIVHAAAR.G	3167.5717	0.00		3
			R.VSEM(15.995)LATLTGAVFVER.V	492.2254	0.00		2
			R.VSEMLATLTGAVFVER.V	1749.9335	0.00		3
WP_003429565.1	phosphoglycerate kinase	phosphoglycerate			0.96	0.06	23
			K.EVVFAADDNVVGENAK.K	1731.8679	1		2
			R.AHCSTVGAGEFLQER.V	1688.7941	0.92		3
			K.ELPGIAALDNK.-	1195.6812	0.00		2
			K.MENGDVVLLENTR.Y	1516.7555	0.00		2
			R.AHCSTVGAGEFLQER.V	1688.7941	0.00		2
WP_004454998.1	flavodoxin family protein	flavodoxin			0.96	0.00	2
			K.AMLEECGLSCK.I	1352.6138	0.96		2
WP_009887887.1	50S ribosomal protein L4	50S			0.96	0.12	23
			K.ALVVIADK.N	883.5743	0.96		2
			K.ALVVIADKNDNVIK.S	1594.9658	0.95		2
			K.ALVVIADKNDNVIK.S	1594.9658	0.97		3
			K.KALVVIADKNDNVIK.S	1751.0921	0.9		3
			K.TKEFAQILNNINAAK.K	1758.004	0.88		2
			K.TKEFAQILNNINAAK.K	1758.004	0.9		3
			K.VQNSEVIVLDALNMDAPK.T	2012.0693	0.69		2
			K.VQNSEVIVLDALNMDAPK.T	2012.0693	0.66		3
			K.YDSFIITTDAVK.K	1427.7548	0.97		2
			K.YDSFIITTDAVK.K	1427.7548	0.97		3
			K.YDSFIITTDAVKK.V	1583.8811	1.09		3
			R.SVQWVGGGVAFAPK.P	1457.8031	0.96		2
			R.SVQWVGGGVAFAPK.P	1457.8031	1.06		3
			R.SVQWVGGGVAFAPKPR.S	1711.9603	1.06		2
			R.SVQWVGGGVAFAPKPR.S	1711.9603	1.06		3
			K.EFAQILNNINAAK.K	1500.83	0.00		2
			K.VQNSEVIVLDALNM(15.995)DAPK.T	1571.8229	0.00		2
			K.VQNSEVIVLDALNM(15.995)DAPK.T	1571.8229	0.00		3
WP_009889910.1	tRNA (guanosine(46)-N7)-methyltransferase TrmB	tRNA			0.96	0.00	3
			R.VLEDDGEIHFK.T	1356.6925	0.96		3
			R.VLEDDGEIHFK.T	1356.6925	0.00		2
WP_009891688.1	hypoxanthine phosphoribosyltransferase	hypoxanthine			0.96	0.05	2
			R.NINLPLR.V	866.5338	1.03		2
			R.NVPYIFNVTDEDR.-	1608.7784	0.93		2
			R.VNFMTTSSYGNNEESTGK.V	2021.9081	0.96		2
			K.CCVLLDKPSR.R	1302.6788	0.00		3
			K.KWEVLYSEEK.I	1393.7493	0.00		3
			K.NLM(15.995)VVSLLK.G	404.2093	0.00		2
			R.VNFMTTSSYGNNEESTGK.V	2021.9081	0.00		3
WP_009896192.1	cysteine desulfurase NifS	cysteine			0.96	0.01	23
			R.AGTENIPAIVGYGK.A	1444.7926	0.96		2
			R.LHNFVHGGAQEK.S	1391.731	0.97		3
			K.ENMQNHVETLTR.L	1498.7198	0.00		2
			K.LIDGVLER.I	941.5546	0.00		2
			R.SMSPLYDDAK.K	1181.5638	0.00		2
WP_009897033.1	YdcF family protein	YdcF			0.96	0.00	2
			R.EFFALWK.T	995.548	0.96		2
			K.INDNCYVVVSGGK.G	1479.7392	0.00		2
			K.IVTTDFHVLR.S	1227.6976	0.00		3
WP_009897952.1	cell wall-binding repeat-containing protein	cell			0.96	0.13	234
			K.DGSYIEAVEIDTSNNEVSR.W	2125.9845	1.09		2
			K.GWSMVTISNQSFIER.A	1781.8771	0.79		2
			K.ISNNSSSVTIK.N	1204.6663	0.93		2
			K.KPITNDTDKDEDKK.A	1785.9724	0.81		4
			K.NSGNINTISGSEEPSISGK.K	1945.9593	1		2
			K.NSGNINTISGSEEPSISGK.K	1945.9593	0.95		3
			K.QLNAENISFER.I	1347.6783	1.13		2
			K.VESCIPALK.D	1071.5998	1.01		2
			K.VESCIPALKDYVR.I	1604.8596	0.96		3
			R.AKDGSYIEAVEIDTSNNEVSR.W	2353.1479	1.19		3
			R.ITISTKPESSK.Y	1273.7493	0.84		2
			R.ITISTKPESSK.Y	1273.7493	0.89		3
			K.DVYILNR.G	919.5127	0.00		2
			K.QSITIDMPNGDIK.N	1486.7701	0.00		2
			K.SDANDIIR.F	930.4771	0.00		2
			N.SGNINTISGSEEPSISGK.K	1831.9163	0.00		2
WP_009901804.1	TIGR04100 family radical SAM protein	TIGR04100			0.96	0.00	2
			R.INELIDVAK.F	1069.6383	0.96		2
			K.EVAFSVVNEISPEEIEESK.Q	2191.0977	0.00		2
			K.SFDYMLDFAR.D	1291.5907	0.00		2
			R.INTNGLSDLIHNK.K	1493.8202	0.00		3
			R.INTNGLSDLIHNKK.T	1649.9465	0.00		3
WP_009902192.1	cell wall-binding protein Cwp25	cell			0.96	0.04	2
			K.VTAIGISDK.S	958.5699	0.98		2
			R.DGAPIILTK.D	982.6063	0.93		2
			K.NAPVVLVSNK.S	1095.6652	0.00		2
WP_009903759.1	cobalt-precorrin-7 (C(5))-methyltransferase	cobalt-precorrin-7			0.96	0.00	3
			K.VPDFDYILSHK.K	1388.734	0.96		3
			K.IIVVGENLSYDNEK.I	1647.872	0.00		2
WP_003420702.1	butyrate kinase	butyrate			0.97	0.11	2
			K.EIGASAAVLK.G	1013.6121	0.89		2
			R.VLTGEEEAQVYDN.-	1493.6886	1.04		2
			K.IVDVANALDGEGPFSPER.S	1913.9564	0.00		2
WP_003422104.1	D-proline reductase (dithiol) proprotein PrdA	D-proline			0.97	0.22	23
			K.IVLEENEQSLPMSK.K	1671.8753	1.02		2
			K.IVLEENEQSLPMSK.K	1671.8753	1.06		3
			K.LNNIEAIEK.V	1098.6285	0.9		2
			K.NAIEGVEVK.A	1013.5757	0.92		2
			K.QGIENEILSNNTLAPEDAVR.I	2211.1213	0.78		2
			R.HYWREPLVIR.A	1395.7775	1.42		3
			K.IVLEENEQSLPM(15.995)SK.K	1428.717	0.00		2
			K.IVLEENEQSLPM(15.995)SK.K	1428.717	0.00		3
			K.QGIENEILSNNTLAPEDAVR.I	2211.1213	0.00		3
			K.SKQGIENEILSNNTLAPEDAVR.I	2454.2795	0.00		3
			K.YM(15.995)THMVDNNK.S	340.1457	0.00		2
			K.YM(15.995)THMVDNNK.S	340.1457	0.00		3
			K.YMTHM(15.995)VDNNK.S	709.2928	0.00		3
			K.YMTHMVDNNK.S	1307.6002	0.00		2
			K.YMTHMVDNNK.S	1307.6002	0.00		3
			M.SITLETAQAHANDPAVCCCR.F	2302.0334	0.00		3
WP_003424537.1	30S ribosomal protein S2	30S			0.97	0.08	23
			K.EVAETGKPILFVGTK.K	1671.9811	0.97		3
			K.MEEEGVFNVLPK.K	1446.7429	1.06		2
			K.QAQDAIKDEAER.C	1428.7209	0.97		2
			K.QAQDAIKDEAER.C	1428.7209	0.93		3
			R.CGMYFVNER.W	1202.5213	1.16		2
			R.KENIAIQEAHR.L	1363.7572	0.97		2
			R.KENIAIQEAHR.L	1363.7572	0.93		3
			R.QGAEEEVAEDQE.-	1360.563	1.04		2
			K.EVAETGKPILFVGTK.K	1671.9811	0.00		2
			K.LITGAMATAVIEGR.Q	1429.7963	0.00		2
			R.NGIYIIDLQK.T	1231.7176	0.00		2
			R.WLGGMLTNHK.T	1211.6485	0.00		3
WP_003427760.1	electron transfer flavoprotein subunit beta/FixA family pro	electron			0.97	4.78	23
			K.IEGKDIIVQR.Q	1225.7394	0.93		3
			K.ILVCVK.Q	786.5037	20		2
			K.LDIPQVTYVQDFK.I	1620.8763	0.69		2
			K.QVPDTNEVR.I	1084.5513	0.99		2
			K.VGDYDIIFAGR.Q	1252.6452	1.03		2
			K.VSTPVLLTAVK.E	1182.7588	0.99		2
			K.VWTIDDLDVNKEEVGLK.A	2057.1126	0.64		3
			R.AFGGADTWATSNTIAAGISK.V	1995.0143	0.89		2
			R.DGVPSILNPDDANALEEALK.I	2137.0984	0.66		2
			R.DGVPSILNPDDANALEEALK.I	2137.0984	0.63		3
			R.ECLAMGADDAILLSDR.A	1776.8386	0.91		2
			R.INKETGTLIR.D	1199.7238	0.95		2
			R.QAIDGDTAQVGPQIAEK.L	1795.9316	1.01		2
			R.QAIDGDTAQVGPQIAEK.L	1795.9316	1.03		3
			R.QLEDGYELIK.V	1262.6758	1.05		2
			R.SFTPEPR.G	860.4392	1.14		2
			K.VWTIDDLDVNKEEVGLK.A	2057.1126	0.00		2
			R.AFGGADTWATSNTIAAGISK.V	1995.0143	0.00		3
			R.ECLAM(15.995)GADDAILLSDR.A	650.2768	0.00		2
			R.GKGEILEGK.A	1013.6121	0.00		2
WP_003428379.1	NUDIX hydrolase	NUDIX			0.97	0.06	2
			K.TSIGLLLVK.D	998.674	0.93		2
			K.VDTVEIPGQGYQK.R	1488.7824	1.01		2
			R.ELKEETGYSAK.N	1337.7079	0.00		3
WP_003430626.1	fructose-6-phosphate aldolase	fructose-6-phosphate			0.97	0.00	2
			K.AGANYIAPYVNR.L	1335.6935	0.97		2
			R.LDNISGDGVAMVSELIK.I	1815.9652	0.00		2
WP_003434301.1	nitroreductase family protein	nitroreductase			0.97	0.06	2
			K.GIQNEINDNGLLPGSR.Q	1723.8853	1.08		2
			K.IIEAGINAPSSK.N	1254.7184	0.92		2
			K.NQSISHETIEK.I	1340.6936	0.96		2
			R.FVVITEK.E	890.5477	0.97		2
			R.LQLSDVTEWR.-	1273.6667	1		2
			K.NQSISHETIEK.I	1340.6936	0.00		3
			K.YKNQSISHETIEK.I	1659.8832	0.00		3
			K.YKNQSISHETIEK.I	1659.8832	0.00		4
WP_003438024.1	helix-turn-helix domain-containing protein	helix-turn-helix			0.97	0.08	23
			K.AMLGQIER.G	944.5113	0.96		2
			K.KEEVEPIVEQK.G	1410.797	0.93		3
			K.LYPIYPFSPQR.R	1407.7551	0.98		2
			K.TIFHNIEVYR.-	1318.7034	1.02		3
			R.GESSPTVSTLWK.I	1346.7082	1.08		2
			R.QEMGISLDK.A	1075.5584	0.84		2
			K.KEEVEPIVEQK.G	1410.797	0.00		2
			K.TYILESGHSIR.F	1302.6932	0.00		2
			K.TYILESGHSIR.F	1302.6932	0.00		3
WP_009892113.1	thymidylate kinase	thymidylate			0.97	0.17	2
			K.ATQTEILYER.L	1250.6507	1.09		2
			K.NASDVDPYIASTFFTADR.Y	2017.9462	0.85		2
			K.LIIIESGSDASGK.A	1344.7501	0.00		2
			K.NASDVDPYIASTFFTADR.Y	2017.9462	0.00		3
WP_009898085.1	GyrI-like domain-containing protein	GyrI-like			0.97	0.00	2
			R.EIYISDAR.K	993.5131	0.97		2
			K.KNPVIVEIPEQK.F	1476.8916	0.00		3
WP_009901573.1	adenylate kinase	adenylate			0.97	0.17	23
			K.GTQAAGIVEK.Y	1028.5866	1		2
			K.IEGVCDVCQGELYQR.A	1852.8448	1.06		2
			K.IEGVCDVCQGELYQR.A	1852.8448	1.08		3
			K.NGFMLDGFPR.N	1180.5699	0.96		2
			K.QGIIADIK.G	912.5644	1.02		2
			K.VFEDIVAALGSGK.-	1360.7602	0.46		2
			K.VVNIEVDK.S	970.5699	0.97		2
			K.YNIPHISTGDIFR.K	1559.8096	0.82		3
			R.ADDNEETVSKR.I	1318.6365	0.87		2
			R.ADDNEETVSKR.I	1318.6365	0.94		3
			R.IILLGPPGAGK.G	1090.7114	0.99		2
			K.AKEYM(15.995)DQGLLVPDELTVGLVTDR.I	696.3517	0.00		3
			K.NAGISLDK.V	872.4967	0.00		2
			K.NGFM(15.995)LDGFPR.N	495.2152	0.00		2
			K.NIKEGTELGK.K	1171.6812	0.00		2
			K.NIKEGTELGKK.A	1327.8075	0.00		3
			K.SCGATYHVEFNPPK.I	1661.7872	0.00		3
			K.YNIPHISTGDIFRK.N	1715.9359	0.00		4
WP_009901862.1	salicylate synthase	salicylate			0.97	0.09	23
			K.EIAEHAISVK.L	1151.655	0.85		2
			K.ISSVLNQIIYEED.-	1549.7876	1.08		2
			K.KITHVVSEK.M	1123.6965	0.86		2
			K.NVYTFPLAGTR.A	1265.6768	0.87		2
			K.RVDMYQSYLYGR.Q	1577.7661	0.94		3
			R.GTVQHLASR.L	995.5512	1.02		2
			R.VDMYQSYLYGR.Q	1421.6649	1		2
			R.VGAGIVSMSNPER.E	1343.6867	1.02		2
			-.MVTNNFENR.Y	1151.5393	0.00		2
			K.EIVSQAVNDINNGEYEK.V	1977.9725	0.00		2
			K.LAFEELENCCEK.D	1596.7164	0.00		2
			R.EIIGFSPETVVEVDREK.N	2003.0656	0.00		3
			R.VGAGIVSM(15.995)SNPER.E	760.4153	0.00		2
WP_009902250.1	phosphodiesterase	phosphodiesterase			0.97	0.08	2
			K.LENIVIVK.G	982.6427	0.91		2
			R.NDIPEGYNPK.K	1201.5979	1.03		2
			K.IGIMSDTHGSLLYFEK.A	1866.9631	0.00		3
			K.MGGGILVLGHTHVK.K	1473.849	0.00		3
			R.IILNHGYIESEEEIIDK.A	2071.0918	0.00		3
WP_009902785.1	1-acyl-sn-glycerol-3-phosphate acyltransferase	1-acyl-sn-glycerol-3-phosphate			0.97	0.00	2
			R.DGYVLGIFPEGTR.I	1450.7456	0.97		2
			K.SNLDPIFLAAAIENR.E	1670.8992	0.00		2
WP_003416187.1	5-methylthioadenosine/adenosylhomocysteine nucleosidase	5-methylthioadenosine/adenosylhomocysteine			0.98	0.00	2
			K.DIVLNMLK.S	1000.5991	0.98		2
			K.ADGSADVTYDVFVHDAANNSK.D	2252.0427	0.00		3
			K.VDAIVNTGVAGALNEK.L	1625.8988	0.00		2
WP_003417347.1	electron transfer flavoprotein subunit alpha/FixB family pr	electron			0.98	0.15	2
			K.IAPVVIELLGEGR.K	1392.8341	0.82		2
			K.ITQDDIR.T	887.4712	0.99		2
			K.LDSVDDLLEAIKA.-	1456.8025	0.57		2
			K.LGGVVGSSR.A	858.4923	1		2
			K.NVWIFAEQR.E	1189.6244	1.01		2
			K.VYVADDALLEK.Y	1290.7071	0.98		2
			R.TGEVIALDYK.I	1163.6438	1.07		2
			R.TTVLETVK.T	945.5747	0.96		2
			R.VGTGLTADCTK.L	1177.6013	0.91		2
			K.EVDAELCAILLGK.D	1485.8113	0.00		2
WP_003417965.1	helix-turn-helix transcriptional regulator	helix-turn-helix			0.98	0.43	23
			K.FENMSEVFYK.A	1348.6373	0.91		2
			K.NVVIGNR.I	798.4712	1.81		2
			K.QLSQLLEEPHAK.I	1447.8035	0.98		3
			K.VGILELVEEK.I	1183.7064	0.98		2
			K.QLSQLLEEPHAK.I	1447.8035	0.00		2
WP_003419758.1	DUF3867 domain-containing protein	DUF3867			0.98	0.07	23
			K.MSMAEFSR.K	985.4361	0.95		2
			K.VSTEDLESFKK.S	1365.7392	1.09		3
			K.VVMCETTNKYDY.-	1577.7106	0.98		2
			K.NDLNDINVIIDQEK.I	1697.8836	0.00		2
			K.VSTEDLESFKK.S	1365.7392	0.00		2
			K.VVM(15.995)CETTNKYDY.-	375.2192	0.00		2
			R.NFGIDPSTAGFM(15.995)SNNTSSK.V	1283.5856	0.00		2
			R.NFGIDPSTAGFMSNNTSSK.V	2030.9449	0.00		2
			R.YGMDTEEVEK.Q	1255.5642	0.00		2
WP_003421121.1	30S ribosomal protein S4	30S			0.98	0.19	234
			K.AGENLLSLLER.R	1241.698	0.98		2
			K.FKNLVEVNSR.I	1260.719	1.02		3
			K.KVSNYGLQLR.E	1232.7241	0.88		2
			K.KVSNYGLQLR.E	1232.7241	1.02		3
			K.NLVEVNSR.I	957.5243	0.98		2
			K.RNYAPGQHGQGR.K	1367.6807	0.95		3
			K.VDIPSLIVK.V	1038.6689	1.03		2
			K.VGDVIEVK.E	913.5484	0.95		2
			K.VGDVIEVKEK.S	1198.7173	1.03		3
			K.VSNYGLQLR.E	1076.5978	1		2
			K.VVGVPTREDIDLEIAEHLIIELYSK.-	2907.6038	0.42		3
			K.VVGVPTREDIDLEIAEHLIIELYSK.-	2907.6038	0.49		4
			K.WLEANVEGMTAK.V	1403.7119	1.16		2
			R.AENMPGK.A	801.4055	1.11		2
			R.IYGVLETQFR.N	1252.6816	0.98		2
			R.NYAPGQHGQGR.K	1211.5796	0.98		2
			R.NYAPGQHGQGR.K	1211.5796	1.04		3
			K.FKNLVEVNSR.I	1260.719	0.00		2
			K.LFLKGDR.C	903.5542	0.00		2
			K.VGDVIEVKEK.S	1198.7173	0.00		2
			K.WLEANVEGM(15.995)TAK.V	1075.5008	0.00		2
			R.QLVTHGHFTLNGNK.V	1620.8736	0.00		3
			R.RLDNVVYR.M	1061.5982	0.00		2
WP_003421188.1	50S ribosomal protein L1	50S			0.98	0.14	234
			K.AKEAEQAGADFVGAEELVQK.I	2174.13	0.93		2
			K.AKEAEQAGADFVGAEELVQK.I	2174.13	0.94		3
			K.AKEAEQAGADFVGAEELVQK.I	2174.13	0.94		4
			K.EAEQAGADFVGAEELVQK.I	1946.9666	1.01		2
			K.EAEQAGADFVGAEELVQK.I	1946.9666	1		3
			K.FDETVEAHIK.L	1243.6449	0.94		2
			K.FDETVEAHIK.L	1243.6449	0.96		3
			K.GLMPNPK.S	811.4626	1.05		2
			K.LTENFTALMDAIIK.A	1634.8953	0.52		2
			K.RVLVFAK.G	887.5957	0.91		2
			K.SGTVTFDVAK.A	1079.5863	1.02		2
			K.TNIIHVPVGK.V	1132.6968	1.01		2
			R.GAVVLPHGTGK.T	1090.6499	1.01		2
			R.LDKTNIIHVPVGK.V	1516.9341	0.94		3
			R.SITVASSMGPGVK.I	1288.7061	1.09		2
			R.SITVASSMGPGVK.I	1288.7061	1.2		3
			K.FYDASEALTLVSDIAGAK.F	1927.002	0.00		2
			K.FYDASEALTLVSDIAGAK.F	1927.002	0.00		3
			K.GLM(15.995)PNPK.S	347.1879	0.00		2
			K.LTENFTALM(15.995)DAIIK.A	1066.5369	0.00		2
			K.RYAGALQK.V	961.5709	0.00		2
			R.SITVASSM(15.995)GPGVK.I	822.4157	0.00		2
			R.YAGALQK.V	805.4698	0.00		2
WP_003421197.1	FAD-dependent thymidylate synthase	FAD-dependent			0.98	0.05	23
			K.LISHTPEPEK.V	1205.6656	0.88		2
			K.LISHTPEPEK.V	1205.6656	0.95		3
			K.VAPILFK.K	842.563	1		2
			R.NLAVEMLR.E	972.5426	1.02		2
			R.SLFNFFEHR.C	1223.6087	1.01		3
			R.YVFPNACETK.M	1283.622	0.96		2
			K.KTGPSCVNGSCPEGTMTCGDIVQVR.E	2766.2639	0.00		3
			K.LEQFEYIIPPEIEK.I	1803.974	0.00		2
			K.TGPSCVNGSCPEGTMTCGDIVQVR.E	2610.1376	0.00		2
			K.TGPSCVNGSCPEGTMTCGDIVQVR.E	2610.1376	0.00		3
WP_003425856.1	F0F1 ATP synthase subunit delta	F0F1			0.98	0.07	2
			-.MINVIANR.Y	957.543	1.06		2
			K.NVTIENVVDK.T	1185.6605	0.98		2
			K.TILGGVLVR.I	954.6226	1.05		2
			K.VVDMMTK.V	878.4606	0.9		2
			R.IGNEQIDGTVK.T	1228.6663	0.94		2
			K.NLVEIIFSK.E	1117.6747	0.00		2
WP_003428442.1	3-oxoacyl- 3-oxoacyl-	3-oxoacyl-			0.98	0.11	23
			K.AGVIGFTK.A	847.5167	1.07		2
			K.ESTLANIPK.K	1027.5914	0.98		2
			K.IDILVNNAGITK.D	1325.7919	0.93		2
			K.TKNEIESMGVK.C	1318.7166	1.03		3
			K.VLSDDVK.E	830.4749	0.95		2
			K.VLSDDVKESTLANIPK.K	1812.0244	1		3
			R.NININAVAPGFIETDMTK.V	2004.0431	0.72		2
			K.AVTKPMMK.K	988.5813	0.00		2
			K.NEIESM(15.995)GVK.C	749.3266	0.00		2
			K.TKNEIESM(15.995)GVK.C	1006.5005	0.00		3
			K.TKNEIESMGVK.C	1318.7166	0.00		2
			K.VLSDDVKESTLANIPK.K	1812.0244	0.00		2
			R.IINM(15.995)TSVVGIM(15.995)GNAGQTNYCASK.A	517.2934	0.00		3
			R.IINM(15.995)TSVVGIMGNAGQTNYCASK.A	517.2934	0.00		3
			R.IINMTSVVGIMGNAGQTNYCASK.A	2485.2209	0.00		3
			R.NININAVAPGFIETDM(15.995)TK.V	1745.8658	0.00		2
			R.NININAVAPGFIETDM(15.995)TK.V	1745.8658	0.00		3
WP_003428771.1	cyclase family protein	cyclase			0.98	0.22	2
			K.AYVLELEK.G	1019.5903	0.98		2
			K.EAANYIANTNIK.G	1376.73	0.92		2
			K.GIGIDMLSVDR.Y	1202.6329	1.47		2
			K.GNENIELEYLK.K	1376.7188	0.88		2
			K.IIIENLTNLENVPEK.F	1794.0139	0.79		2
			K.QYYVGYPTLTK.E	1387.7388	1.01		2
			K.YNDADGAPVR.A	1104.52	1.04		2
			K.IIIENLTNLENVPEK.F	1794.0139	0.00		3
WP_003430934.1	molecular chaperone DnaK	molecular			0.98	0.00	2
			R.TTPSVVAFTK.D	1105.6383	0.98		2
			R.IINEPTAAALAYGMDK.L	1732.907	0.00		2
WP_003435129.1	lactate utilization protein	lactate			0.98	0.14	23
			-.MDQNLNWLNEK.R	1459.713	0.92		2
			K.GYLVSNKEELLK.K	1475.8599	1.03		3
			K.TIAAPANCK.R	1000.5376	0.98		2
			K.TIAAPANCKR.L	1156.6387	0.99		2
			K.VIVIAGVNK.I	967.643	0.98		2
			K.YNFLDR.Y	854.4287	1.05		2
			R.ICCSYTLIK.R	1212.6247	0.98		2
			R.IHVIFLNEDFGY.-	1493.7555	0.57		2
			R.VAAMIYGPDK.V	1119.5998	0.97		2
			-.M(15.995)DQNLNWLNEK.R	177.0824	0.00		2
			K.DVDEAIKR.T	1000.5553	0.00		2
			K.GYLVSNKEELLK.K	1475.8599	0.00		2
			K.IVKDVDEAIKR.T	1368.8341	0.00		2
			K.IVKDVDEAIKR.T	1368.8341	0.00		3
			K.TTGICIDCSSPGR.I	1450.6545	0.00		2
			R.VAAM(15.995)IYGPDK.V	418.225	0.00		2
WP_003435799.1	HAD family hydrolase	HAD			0.98	0.00	2
			K.YIAGSNLDGTR.V	1193.6041	0.98		2
WP_003436172.1	SDR family oxidoreductase	SDR			0.98	0.15	23
			K.AAINSLTQNIATQYAK.D	1761.9625	0.95		2
			K.AAINSLTQNIATQYAK.D	1761.9625	0.98		3
			K.AAIPHMIK.N	935.5626	0.89		2
			K.AALDNMSPEFIK.E	1390.7166	0.97		2
			K.FVYFNAR.E	943.4916	0.99		2
			K.GIGLASAEILAK.N	1197.7333	1.09		2
			K.GSIVNISSIGSVLPDLSR.I	1841.0258	0.52		2
			K.IAVVTAATK.G	928.5957	1.02		2
			K.NGATVYLAAR.S	1062.5822	1.05		2
			K.SVYLPCK.A	921.4994	1.02		2
			R.CNAVLPGLIATK.A	1311.7584	1.01		2
			R.EEETFTSMIEEVVK.K	1725.8383	0.71		2
			R.EEETFTSMIEEVVKK.E	1882.9679	0.84		3
			R.IGEPDDIAK.A	1012.5441	0.91		2
			R.SEELANEVINK.I	1300.6875	1.12		2
			K.AALDNM(15.995)SPEFIK.E	661.3105	0.00		2
			R.IAYCVSK.A	895.4837	0.00		2
WP_003438166.1	O-methyltransferase	O-methyltransferase			0.98	0.02	23
			K.DGGLLVSDNILYK.G	1461.8079	0.97		2
			K.GMVAHDDFVVR.R	1272.6285	1		3
			K.DADIITVER.N	1058.5608	0.00		2
			K.GM(15.995)VAHDDFVVR.R	234.1038	0.00		3
			K.LAGFDNNITILEGDAEEK.L	2005.0085	0.00		2
WP_004454531.1	TerD family protein	TerD			0.98	0.13	23
			K.FSAVGAGFEGGLEALCR.N	1767.8614	0.74		2
			R.QNFGQVSNSYIR.V	1439.7157	1.01		2
			R.RQNFGQVSNSYIR.V	1595.8168	0.95		3
			R.VLNSENDEEILR.Y	1457.7362	1.01		2
			K.HPSGAVEHLGDNR.T	1415.6906	0.00		3
WP_009888208.1	hydrolase	hydrolase			0.98	0.00	2
			R.VSNWIDIEK.I	1158.6285	0.98		2
			K.GHNLSFVTAR.H	1128.604	0.00		2
			K.VILLDTNYNK.D	1247.7125	0.00		2
			R.DVYAEFNNK.Y	1154.5608	0.00		2
			R.HECLTDVTK.N	1157.5751	0.00		2
WP_009890612.1	pyruvate, phosphate dikinase	pyruvate,			0.98	11.02	23
			K.GANLAEMTK.I	989.5216	0.85		2
			K.YKFENVLDR.V	1238.6659	20		3
			K.YVYSFGEGSK.D	1191.5812	0.98		2
WP_009897922.1	phosphoenolpyruvate--protein phosphotransferase	phosphoenolpyruvate--protein			0.98	0.14	2
			K.EVLAELDSEGVAYAK.D	1648.856	0.98		2
			K.ISYLYNQFNPAVLR.L	1725.9283	0.72		2
			K.LADDVLNMGTAEEIK.S	1673.8546	1.01		2
			K.WAGMCGESAGDQK.M	1451.6173	0.99		2
			K.LADDVLNM(15.995)GTAEEIK.S	917.4528	0.00		2
			K.SIDNVEAEIAK.L	1243.666	0.00		2
			K.TVIDNAHK.E	952.5342	0.00		2
			K.TVIDNAHKEGK.W	1294.7245	0.00		3
			K.WAGM(15.995)CGESAGDQK.M	491.2202	0.00		2
WP_009897960.1	S-layer protein SlpA	S-layer			0.98	0.14	23
			K.AGETTYSTGLTFEDGSTEK.I	2049.946	0.97		2
			K.AGETTYSTGLTFEDGSTEK.I	2049.946	0.98		3
			K.ASIADENSPVK.L	1185.6241	0.98		2
			K.AVEQLQK.G	870.5175	1.07		2
			K.DLKDYVDDLR.T	1306.6769	1		2
			K.DLKDYVDDLR.T	1306.6769	1.1		3
			K.DYVDDLR.T	922.4396	0.99		2
			K.EETIDIDASSSK.T	1349.6562	1.11		2
			K.EVENELK.D	915.4913	1		2
			K.EVENELKDMGLK.V	1487.7905	1		3
			K.GIATSVINK.L	957.5859	1.1		2
			K.GILDGSITEIK.V	1200.6966	1.05		2
			K.IADEVGLDNDK.A	1243.6296	0.96		2
			K.KAPLLLTSK.D	1053.7162	0.87		2
			K.KVYLAGGVNSISK.E	1418.8497	0.79		2
			K.KVYLAGGVNSISK.E	1418.8497	0.95		3
			K.LAMSAIFDTAYTDSSETAVK.I	2177.0643	0.75		2
			K.LAMSAIFDTAYTDSSETAVK.I	2177.0643	0.6		3
			K.LGDSDIIDITK.A	1244.6864	1.01		2
			K.LKDLLSM.-	874.5198	1.42		2
			K.LLFTQVDNK.L	1132.6492	1.26		2
			K.LTVVPGSK.A	855.543	0.98		2
			K.MDLADGDATPIVVVDGK.A	1770.9074	0.96		2
			K.STTGINTSK.K	963.5237	0.98		2
			K.TAQDLAK.K	801.4596	0.95		2
			K.TPSASVQPVITK.L	1282.7497	1		2
			K.VETGDQGYTVVQSK.Y	1565.7937	0.98		2
			K.VFFEGTLASTIK.V	1367.7701	0.82		2
			K.VGSELNAADASK.L	1216.6299	0.91		2
			K.VLNGDEADTNGLIEEVSGK.Y	2016.0092	0.89		2
			K.VLTGSDNDKNK.L	1273.6878	0.84		3
			K.VVNFFVAK.D	978.5902	0.95		2
			K.VYLAGGVNSISK.E	1262.7234	0.97		2
			K.YQVVLYPEGK.R	1250.6911	0.95		2
			K.YYNSDDENAIFR.D	1533.6736	1.04		2
			R.IETAIALSQK.Y	1128.6754	0.91		2
			R.IINAKEETIDIDASSSK.T	1918.034	1.24		3
			R.LAGDDRYETSLK.I	1422.7355	0.96		2
			R.LAGDDRYETSLK.I	1422.7355	0.75		3
			A.DDTKVETGDQGYTVVQSK.Y	2054.0249	0.00		3
			I.IAGTSSADGVVTNTGAASGSTETNSAGTK.L	2668.2869	0.00		3
			K.AFVVGGTGLADAM(15.995)SIAPVASQLR.N	1235.622	0.00		2
			K.DLTGASADAIIAGTSSADGVVTNTGAASGSTETNSAGTK.L	3582.7214	0.00		3
			K.DVENAIDDATGK.S	1302.6303	0.00		2
			K.ESSYYQDNLNNDK.K	1644.7268	0.00		2
			K.ESSYYQDNLNNDKK.V	1800.853	0.00		2
			K.ESSYYQDNLNNDKK.V	1800.853	0.00		3
			K.EVENELKDMGLK.V	1487.7905	0.00		2
			K.LAM(15.995)SAIFDTAYTDSSETAVK.I	361.2035	0.00		2
			K.LAM(15.995)SAIFDTAYTDSSETAVK.I	361.2035	0.00		3
			K.LVSPAPIVLATDSLSSDQSVSISK.V	2470.3611	0.00		3
			K.M(15.995)DLADGDATPIVVVDGK.A	177.0824	0.00		2
			K.MDLADGDATPIVVVDGK.A	1770.9074	0.00		3
			K.VLDKDNGENLVQVGK.G	1710.9516	0.00		2
			K.VLDKDNGENLVQVGK.G	1710.9516	0.00		3
			M.SAIFDTAYTDSSETAVK.I	1860.8993	0.00		2
			R.IINAKEETIDIDASSSK.T	1918.034	0.00		2
			R.TYNNGYSNAIEVAGEDR.I	1899.8599	0.00		2
WP_009902280.1	RnfABCDGE type electron transport complex subunit G	RnfABCDGE			0.98	0.15	23
			K.AKDDAFKGQYK.G	1381.7606	0.83		3
			K.TAEPLEVAK.G	1012.5805	1.12		2
			R.NIQANNELR.K	1098.5782	0.98		2
			R.NIQANNELRK.A	1254.7044	0.00		2
			R.NIQANNELRK.A	1254.7044	0.00		3
WP_009902542.1	lactate utilization protein	lactate			0.98	0.12	2
			K.EMSVQTAVR.E	1047.5383	1.07		2
			K.VILVGENLGL.-	1053.6434	0.78		2
			R.TIASPAVVQR.F	1068.6291	0.98		2
			R.VAAMIFGPK.N	988.578	0.98		2
			K.EM(15.995)SVQTAVR.E	306.1249	0.00		2
			K.NIDDAIQR.T	971.5036	0.00		2
			K.NVIVVAGMNK.I	1099.6424	0.00		2
WP_009903112.1	aspartate/glutamate racemase family protein	aspartate/glutamate			0.98	0.00	2
			K.YTMEQDFYK.N	1279.5795	0.98		2
WP_009903755.1	precorrin-3B C(17)-methyltransferase	precorrin-3B			0.98	0.03	2
			-.MIYVVGIGPGSK.D	1275.7261	0.98		2
			K.AIEDSEAIVGYK.T	1349.7079	1		2
			K.DTMTLEAIK.A	1076.5788	0.93		2
			K.GGDTPVGVVK.D	983.5651	0.97		2
			K.FVCTFENM(15.995)DFEK.V	1074.4514	0.00		2
contaminant_KERATIN22	no description	no			0.98	0.14	23
			K.AQYEEIAQR.S	1134.5669	0.99		2
			K.GGSISGGGYGSGGGK.H	1252.6048	0.98		2
			K.VDLLNQEIEFLK.V	1515.8548	0.67		2
			K.VDPEIQNVK.A	1096.6128	0.94		2
			K.YEELQVTVGR.H	1220.6401	0.93		2
			R.FLEQQNQVLQTK.W	1530.8406	0.98		2
			R.GFSSGSAVVSGGSR.R	1281.6313	1.02		2
			R.GGSGGGGSISGGGYGSGGGSGGR.Y	1768.7725	0.97		2
			R.GSSSGGGYSSGSSSYGSGGR.Q	1767.7296	0.97		2
			R.HGGGGGGFGGGGFGSR.S	1347.6068	1.21		2
			R.HGGGGGGFGGGGFGSR.S	1347.6068	1.22		3
			R.KLLEGEECR.M	1188.6173	0.91		2
			R.NLDLDSIIAEVK.A	1384.7814	0.79		2
			R.TAAENDFVTLK.K	1263.6711	1.04		2
			K.AAFGGSGGRGSSSGGGYSSGSSSYGSGGR.Q	2529.0946	0.00		3
			K.DVDNAYM(15.995)IK.V	854.348	0.00		2
			K.DVDNAYMIK.V	1123.5584	0.00		2
			K.HSSGGGSRGGSSSGGGYGSGGGGSSSVK.G	2370.0626	0.00		3
			K.NVQDAIADAEQR.G	1356.6634	0.00		2
			R.DYQELMNVK.L	1194.5955	0.00		2
			R.FLEQQNQVLQTK.W	1530.8406	0.00		3
			R.GGSSSGGGYGSGGGGSSSVK.G	1643.7387	0.00		2
			R.LQGEIAHVK.K	1049.6233	0.00		2
			R.LQGEIAHVKK.Q	1205.7496	0.00		3
			R.SKEEAEALYHSK.Y	1474.7668	0.00		3
			R.SLVGLGGTK.S	886.5488	0.00		2
			R.TAAENDFVTLKK.D	1419.7973	0.00		2
			R.TSQNSELNNM(15.995)QDLVEDYKK.K	1164.5081	0.00		3
			R.YLDGLTAER.T	1064.5502	0.00		2
WP_003418769.1	helix-turn-helix transcriptional regulator	helix-turn-helix			0.99	0.09	2
			K.QLTQEELANR.C	1228.6412	1.05		2
			K.VIWVSTPPSF.-	1159.6277	0.92		2
WP_003421130.1	type I methionyl aminopeptidase	type			0.99	0.15	23
			K.HGFSVVR.D	828.4606	1.24		2
			K.IVADTHEVLR.K	1179.6612	0.99		2
			K.THGVGMISEEDRK.L	1513.7559	0.96		3
			K.THGVGM(15.995)ISEEDRK.L	628.3003	0.00		3
			K.THGVGMISEEDRK.L	1513.7559	0.00		2
			R.ESFYEGIK.F	1027.5226	0.00		2
WP_003421367.1	F0F1 ATP synthase subunit alpha	F0F1			0.99	0.17	2
			R.IVEVPVGEALIGR.V	1378.8184	0.99		2
			R.SVYEPLQTGIK.S	1289.7231	1.22		2
			R.VVNSLGQPIDGK.G	1281.7293	0.9		2
			R.STIAQLVSSLEK.G	1330.7708	0.00		2
WP_003429416.1	GTP cyclohydrolase I FolE	GTP			0.99	0.09	2
			K.AHIAYLPK.G	967.5855	0.99		2
			R.AEAMSLITMK.-	1149.6138	1.05		2
			R.MYEEIFSGLSEEPR.D	1713.792	0.88		2
			R.AEAMSLITM(15.995)K.-	993.4875	0.00		2
WP_003430597.1	UMP kinase	UMP			0.99	0.08	2
			K.FTELSYMEVIQK.E	1542.8004	0.85		2
			K.GENIGTTVK.-	973.5444	1.08		2
			K.LSGEALAGER.G	1029.5455	1.06		2
			K.VFELTTENIIR.A	1361.7555	0.93		2
			K.VMDSTATSLCMDNK.I	1627.7256	0.97		2
			R.QIAEPYIR.R	1016.5655	1.05		2
			R.VQTAIDMR.Q	960.5063	0.99		2
			K.KFTELSYMEVIQK.E	1698.9266	0.00		3
			K.VM(15.995)DSTATSLCMDNK.I	276.1508	0.00		2
			K.VMDSTATSLCM(15.995)DNK.I	1242.5294	0.00		2
			K.VMDSTATSLCMDNK.I	1627.7256	0.00		3
			K.VMDSTATSLCMDNKIPIK.V	2108.0761	0.00		3
			R.AAEM(15.995)EAEVILLAK.N	448.1992	0.00		2
			R.AVKGENIGTTVK.-	1299.7762	0.00		2
			R.AVKGENIGTTVK.-	1299.7762	0.00		3
WP_003435254.1	CoA pyrophosphatase	CoA			0.99	0.00	2
			K.IESGETPYEAVIR.E	1490.7617	0.99		2
			K.VFPDENLPYGSIPNQK.D	1873.9655	0.00		2
			K.YLLENPPNTYSNTVK.V	1808.939	0.00		2
WP_003435673.1	50S ribosomal protein L5	50S			0.99	0.14	23
			K.EQLIFPEIEYDK.I	1578.8181	1.27		2
			K.EQLIFPEIEYDKIDK.V	1964.0588	0.69		2
			K.EQLIFPEIEYDKIDK.V	1964.0588	0.75		3
			K.EVAPALMEK.F	1042.5733	0.93		2
			K.GVEELEMISGQK.P	1374.7065	1.25		2
			K.GVEELEMISGQKPVITK.A	1942.089	1		2
			K.GVEELEMISGQKPVITK.A	1942.089	0.91		3
			K.IVINMGIGDAR.E	1185.654	0.95		2
			K.LLGMPFSK.-	947.5514	0.98		2
			K.LREGMPIGTK.V	1156.6638	1.02		2
			K.LVSVSLPR.V	897.5648	1.02		2
			K.MFYFMDK.L	1036.4762	0.99		2
			K.NVMEIPK.L	885.4994	0.99		2
			K.TDEEARELLK.L	1258.6769	1.04		2
			K.TDEEARELLK.L	1258.6769	1.06		3
			R.EGMPIGTK.V	887.4786	0.92		2
			R.GMDIIFVTTAK.T	1250.6944	0.89		2
			R.GNYALGVK.E	876.5069	1.07		2
			R.GVNPNAFDGR.G	1073.5254	1.02		2
			K.EQLIFPEIEYDKIDKVR.G	2219.2283	0.00		4
			K.GVEELEM(15.995)ISGQK.P	833.3841	0.00		2
			K.GVEELEM(15.995)ISGQKPVITK.A	833.3841	0.00		2
			K.GVEELEM(15.995)ISGQKPVITK.A	833.3841	0.00		3
			K.GVEELEMISGQKPVITK.A	1942.089	0.00		4
			K.IVINM(15.995)GIGDAR.E	616.3618	0.00		2
			K.M(15.995)FYFMDK.L	177.0824	0.00		2
			K.MFYFM(15.995)DK.L	765.323	0.00		2
			K.NVM(15.995)EIPK.L	390.1937	0.00		2
			R.GM(15.995)DIIFVTTAK.T	234.1038	0.00		2
			R.KSVANFK.L	876.5433	0.00		2
WP_003435816.1	DUF1847 domain-containing protein	DUF1847			0.99	0.14	23
			K.QLYEEEENRK.I	1392.6885	0.93		3
			K.STIGLEASQTISK.C	1389.7715	1.19		2
			K.YMEAPITTLVVK.D	1419.8047	0.99		2
			K.IAYNAGLVEAEGYCQYTR.L	2105.9922	0.00		2
			K.QLYEEEENR.K	1236.5623	0.00		2
			K.YM(15.995)EAPITTLVVK.D	340.1457	0.00		2
WP_003439746.1	tRNA-binding protein	tRNA-binding			0.99	0.19	2
			K.FGSPTSDSER.A	1109.4989	0.99		2
			K.LGCIQAK.V	844.4841	0.96		2
			K.SLYPVGTYNVSK.L	1382.7446	1.31		2
			K.EYADGKDIETK.I	1351.6871	0.00		3
WP_004454770.1	tRNA threonylcarbamoyladenosine dehydratase	tRNA			0.99	0.08	2
			K.VVYSTEQPIELK.K	1460.8127	0.99		2
			R.ILDINPNINIK.K	1321.7969	0.98		2
			R.TSFLVGDDGIK.K	1206.6496	1.12		2
			K.DTSDEILTER.Y	1205.5776	0.00		2
			K.IHLIETCEK.K	1197.6427	0.00		3
			K.IISSMGM(15.995)GNK.L	765.3765	0.00		2
			K.IISSMGMGNK.L	1092.5671	0.00		2
			R.TSFLVGDDGIKK.L	1362.7759	0.00		3
WP_009888223.1	2-hydroxyisocaproyl-CoA dehydratase activator HadI	2-hydroxyisocaproyl-CoA			0.99	0.13	23
			K.IEDIVAGIHTSVAK.R	1507.861	0.97		3
			K.NGEDIVASETISSGTGTTGPSR.V	2164.0325	1.12		2
			K.NGEDIVASETISSGTGTTGPSR.V	2164.0325	1.01		3
			K.QISELSCHAR.G	1227.603	0.67		2
			K.QISELSCHAR.G	1227.603	0.96		3
			K.VVVTGYGR.M	877.5022	1		2
			R.FLDVMAK.I	878.4936	1.03		2
			R.GVNFIIPETR.T	1172.6554	1.04		2
			R.LLNFLMNDK.C	1162.642	0.82		2
			R.TIIDIGGQDAK.V	1185.6605	0.98		2
			-.M(15.995)YTM(15.995)GLDIGSTASK.G	177.0824	0.00		2
			-.MYTM(15.995)GLDIGSTASK.G	572.2338	0.00		2
			-.MYTMGLDIGSTASK.G	1529.747	0.00		2
			R.NVVM(15.995)VGGVAR.N	489.2621	0.00		2
			R.NVVMVGGVAR.N	1028.5801	0.00		2
WP_009891708.1	DUF4364 family protein	DUF4364			0.99	0.13	2
			K.QSDNEFIVNLR.V	1361.6939	1.08		2
			R.GVESLEYFFNR.I	1387.6772	0.9		2
			K.DSDREYYALTQR.G	1543.7267	0.00		3
WP_009903837.1	DUF488 domain-containing protein	DUF488			0.99	0.01	2
			K.DVYTQEGYADFEK.V	1619.7355	1		2
			R.IVLLGAMQEPIR.C	1366.8006	0.98		2
			K.VAKEDIFLNGIER.L	1558.8719	0.00		3
			R.TNKDVYTQEGYADFEK.V	1991.9558	0.00		3
WP_009903853.1	GerMN domain-containing protein	GerMN			0.99	0.04	234
			K.IDENTLFEELQK.L	1533.7926	0.99		2
			K.SNLGSDAETLMLDSVAR.T	1805.8829	0.98		2
			K.SNLGSDAETLMLDSVAR.T	1805.8829	0.95		3
			K.SNTNVEQPKEENNTEKEVPNNK.A	2654.3229	1.02		4
			K.TGILDVSSDFTK.S	1337.7079	1.06		2
			K.LNSFTTK.D	865.4909	0.00		2
			K.NM(15.995)NVEQIK.I	291.1253	0.00		2
			K.NMNVEQIK.I	1030.5481	0.00		2
			K.SNTNVEQPKEENNTEKEVPNNK.A	2654.3229	0.00		3
			K.TQSATIYSFDVDK.T	1529.7613	0.00		2
contaminant_KERATIN16	no description	no			0.99	0.00	2
			R.AQYEEIAQR.S	1134.5669	0.99		2
			R.GAFSSVSM(15.995)SGGAGR.C	812.3738	0.00		2
WP_003417102.1	ATP-dependent Clp endopeptidase proteolytic subunit ClpP	ATP-dependent			1	0.17	23
			-.MALVPVVVEQTGR.G	1425.8014	1.05		2
			K.ETLNEILSER.T	1230.6456	1.06		2
			K.EYGLIDEVFTK.R	1368.7177	0.89		2
			K.IKETLNEILSER.T	1499.8559	0.92		2
			K.IKETLNEILSER.T	1499.8559	1		3
			K.MDTERDNFMSALEAK.E	1812.8386	0.52		2
			K.MDTERDNFMSALEAK.E	1812.8386	0.99		3
			R.DNFMSALEAK.E	1180.5798	1.06		2
			R.SYDIFSR.L	914.4498	1.17		2
			R.TGQPLEK.I	827.4753	0.98		2
			K.MDTERDNFM(15.995)SALEAK.E	1185.4795	0.00		3
			R.DNFM(15.995)SALEAK.E	553.2206	0.00		2
WP_003420866.1	NAD-specific glutamate dehydrogenase	NAD-specific			1	0.06	23
			K.GGIIVDPSTLSQGELER.L	1797.9472	0.95		2
			K.IKEEYNVTMR.E	1337.7013	0.99		3
			R.GYIDGIYK.L	983.5328	1.1		2
			R.VIEVSIPVK.M	1038.6689	1.02		2
			K.DVNVFEMAQSQVK.N	1549.781	0.00		2
			K.EHGNLLNFPGAK.R	1351.7248	0.00		3
			K.LVCEAANGPTTPEADEVFAER.G	2304.0773	0.00		2
			K.LVCEAANGPTTPEADEVFAER.G	2304.0773	0.00		3
			R.EAAYMHSIKK.V	1260.69	0.00		3
			R.TAATGFGVAVTAR.E	1248.6826	0.00		2
WP_003423115.1	fructose-6-phosphate aldolase	fructose-6-phosphate			1	0.08	23
			K.DWEGASLKL.-	1073.5757	1.1		2
			K.EGRDFIEVVK.E	1246.6921	1.01		3
			K.GMIEEAEK.L	961.479	1		2
			K.IPMTAEGLK.A	1014.5784	0.95		2
			R.AGATYVSPFVGR.L	1251.6612	0.99		2
			R.FFIDTANIEEIK.E	1494.797	0.85		2
			R.MGADIATVPLK.V	1170.6682	1.01		2
			K.EANDLGVICGVTTNPSLIAK.E	2128.1279	0.00		2
			K.EANDLGVICGVTTNPSLIAK.E	2128.1279	0.00		3
			K.EISEIVDGPISAEVISLEHK.G	2221.1923	0.00		3
			K.GM(15.995)IEEAEK.L	234.1038	0.00		2
			K.IPM(15.995)TAEGLK.A	387.2192	0.00		2
			K.TNVTLIFSAGQALLAAR.A	1773.0149	0.00		2
			K.TNVTLIFSAGQALLAAR.A	1773.0149	0.00		3
			R.DFIEVVK.E	904.527	0.00		2
			R.M(15.995)GADIATVPLK.V	177.0824	0.00		2
			R.NPIHVLQAAR.M	1145.6669	0.00		2
WP_003426034.1	ABC transporter ATP-binding protein	ABC			1	13.44	2
			K.GEFTAIIGSSGSGK.S	1365.714	20		2
			K.IYLEGQDVYGQSNEK.L	1797.8785	1		2
WP_003427762.1	acyl-CoA dehydrogenase family protein	acyl-CoA			1	0.05	23
			K.ELDTLPAEMDK.T	1316.6534	0.97		2
			K.FQNTQFTIADMETK.V	1728.8393	0.95		2
			K.FQNTQFTIADMETK.V	1728.8393	0.97		3
			K.IAMGTLEVGR.I	1073.5903	1.05		2
			K.MVISSNVLK.-	1045.6206	1		2
			K.YYASEIANEVAYK.A	1575.7821	1.01		2
			R.GLVYDAAQK.R	1019.5651	1.05		2
			R.GLVYDAAQKR.D	1175.6663	1.06		2
			R.GTETSDLIFENVK.V	1507.777	1.08		2
			R.GTETSDLIFENVK.V	1507.777	1.08		3
			R.IVSIYEGTSEVQK.M	1507.8134	0.97		2
			R.IVSIYEGTSEVQK.M	1507.8134	0.99		3
			K.ALQLHGGYGFIK.D	1358.7711	0.00		3
			K.FQNTQFTIADM(15.995)ETK.V	1342.6227	0.00		2
			K.FQNTQFTIADM(15.995)ETK.V	1342.6227	0.00		3
			K.IAM(15.995)GTLEVGR.I	361.2035	0.00		2
			K.WDGFSTGAHEDK.M	1404.631	0.00		3
			R.GTSAFIVESK.W	1093.6019	0.00		2
			R.VAQESAMAK.Y	989.5216	0.00		2
WP_003429162.1	orotidine-5-phosphate decarboxylase	orotidine-5-phosphate			1	0.00	2
			K.VGLEQYVATK.G	1162.6598	1		2
			R.ESAINIVR.E	928.5342	0.00		2
WP_003429190.1	ATP-binding cassette domain-containing protein	ATP-binding			1	0.11	23
			K.GIGYAFQQPPR.I	1260.6615	1.05		2
			K.RIEIATLFAR.D	1216.7292	1.06		3
			R.EVDNSLSGGEMK.R	1320.6231	0.96		2
			R.IEIATLFAR.D	1060.6281	0.83		2
			K.DYLNREVDNSLSGGEMK.R	1982.9449	0.00		3
			K.IHEESNQTIIIISHQER.I	2075.0841	0.00		3
			K.KGIGYAFQQPPR.I	1416.7878	0.00		3
			K.LIVITGPNGGGK.S	1180.718	0.00		2
			R.EVDNSLSGGEM(15.995)K.R	1164.4969	0.00		2
			R.ILELADEIIVLQDGSVK.S	1911.101	0.00		2
WP_003430302.1	TerD family protein	TerD			1	0.19	23
			K.FNALGSGFEDGLAGLCK.N	1810.8924	0.85		2
			K.FNALGSGFEDGLAGLCK.N	1810.8924	0.79		3
			K.HASGAVEYMGDNR.T	1433.6358	1.29		2
			K.HASGAVEYMGDNR.T	1433.6358	1.29		3
			K.VTNDGDFIFYNNLK.H	1714.8566	0.9		2
			K.VTNDGDFIFYNNLK.H	1714.8566	0.88		3
			R.QNFGQVENSYIR.I	1481.7263	1.14		2
			R.RQNFGQVENSYIR.I	1637.8274	1		3
			R.TGVGDGDDEQINVDLSK.I	1816.8691	1.1		2
			R.RQNFGQVENSYIR.I	1637.8274	0.00		2
WP_003430702.1	transketolase family protein	transketolase			1	0.00	2
			K.ALEAAEELAK.E	1099.6125	1		2
			R.AATPDVNSENYK.F	1363.662	0.00		2
			R.GIPNMVVLNPADALEAR.Q	1806.9662	0.00		2
			R.NSVAYPNLNVK.I	1273.703	0.00		2
WP_003431048.1	bis(5-nucleosyl)-tetraphosphatase (symmetrical) YqeK	bis(5-nucleosyl)-tetraphosphatase			1	0.04	23
			-.MNLENINQR.L	1158.5815	1.04		2
			K.LCEIYGCDKEK.A	1497.7207	0.96		3
			R.LNQMLPVGR.L	1054.5957	1		2
			K.AYLAGMIHDCAK.Y	1404.6894	0.00		3
			K.LCEIYGCDKEK.A	1497.7207	0.00		2
			R.EDMSLLEK.I	1019.5209	0.00		2
WP_003432442.1	3-methyl-2-oxobutanoate dehydrogenase subunit VorB	3-methyl-2-oxobutanoate			1	0.00	2
			K.IIAGELVAGGAR.-	1153.6819	1		2
			K.SAIDILR.E	814.4913	0.00		2
			R.GGPGLGSIQPSQADYFM(15.995)STR.G	1751.8189	0.00		2
			R.GGPGLGSIQPSQADYFMSTR.G	2097.0031	0.00		2
WP_003435194.1	ATP-dependent chaperone ClpB	ATP-dependent			1	0.17	23
			K.MNISIDSLR.N	1075.5696	1.04		2
			K.NDFLNILSQVR.G	1345.7354	0.96		2
			K.SLNEAYNEAVK.N	1292.6612	1.15		2
			K.VYGEGADSQGVSATR.K	1523.7216	1		2
			K.VYGEGADSQGVSATR.K	1523.7216	0.99		3
			R.NTVNFEIDK.L	1134.5921	0.53		2
			R.VETQDPEGTYDALAR.Y	1691.8003	1.05		2
			R.VETQDPEGTYDALAR.Y	1691.8003	0.97		3
			R.YGTNLVDLAK.K	1148.6441	1.04		2
			K.VYGEGADSQGVSATRK.I	1679.8479	0.00		3
			R.NTVNFEIDKLPK.V	1500.8552	0.00		2
			R.NTVNFEIDKLPK.V	1500.8552	0.00		3
WP_003436178.1	elongation factor G	elongation			1	0.15	2
			K.GGVEPQSENVWR.Q	1384.6735	1.03		2
			K.TVGGSVPK.E	799.4804	1.22		2
			R.ETITQPVDVEYK.Y	1476.7712	0.97		2
			R.VAPQEPGEGYK.F	1229.6292	0.86		2
			K.GNAVLLEPYFK.V	1305.7333	0.00		2
			R.QAETYGVPR.I	1047.5349	0.00		2
			R.VYSGTLESGSYVLNATK.N	1844.9601	0.00		2
WP_003437451.1	pyruvate formate lyase-activating protein	pyruvate			1	0.11	23
			K.IHSIETFGTVDGPGIR.Y	1725.905	1.02		3
			K.LGQFVATLK.N	1031.6379	0.97		2
			K.SIDLTGVGMDK.A	1190.6217	1.12		2
			R.FELLPYHSMGIHK.W	1626.8592	0.86		3
			K.ASEIISK.F	802.48	0.00		2
			K.DVPDATKEDVQK.A	1427.7508	0.00		2
			K.EYTVDEIITDALK.Y	1564.8236	0.00		2
			R.FELLPYHSMGIHK.W	1626.8592	0.00		4
			R.HVLVPGITDDIDNLEK.L	1833.9917	0.00		2
			R.HVLVPGITDDIDNLEK.L	1833.9917	0.00		3
WP_003438473.1	helix-turn-helix transcriptional regulator	helix-turn-helix			1	0.00	2
			R.LNPGDSTFIK.A	1146.6285	1		2
WP_009887855.1	23S rRNA (guanosine(2251)-2-O)-methyltransferase RlmB	23S			1	0.05	23
			K.ASAGAVEYMPVCK.V	1437.6996	1		2
			K.VTNIVNTIK.R	1056.6543	0.93		2
			R.NPVIEAIK.S	938.5801	0.99		2
			R.TADAVGAHGVIIPK.R	1403.8137	1.04		3
			K.ASAGAVEYM(15.995)PVCK.V	925.4215	0.00		2
			K.QNCDFIVK.M	1078.5481	0.00		2
			R.TADAVGAHGVIIPK.R	1403.8137	0.00		2
WP_009888460.1	response regulator transcription factor	response			1	0.00	2
			R.VFLASSYEEAVR.V	1397.7191	1		2
WP_009891044.1	sugar transferase	sugar			1	0.00	2
			K.VVLTGDGAR.-	914.5185	1		2
			K.LKEDIYYIK.N	1267.7428	0.00		3
			M.SGYTNDECEIPK.I	1467.6552	0.00		2
WP_009897067.1	transcriptional repressor LexA	transcriptional			1	0.15	23
			-.MYLDLTEK.Q	1067.5573	1.11		2
			K.GSNNFVLR.V	933.5032	1.02		2
			K.QVLILEFIK.S	1157.7424	0.71		2
			R.EICTAVGLR.S	1045.559	1		2
			R.STSTVHSHLNK.L	1265.6728	1		3
			R.STSTVHSHLNKLEK.L	1663.9257	0.00		3
			R.STSTVHSHLNKLEK.L	1663.9257	0.00		4
WP_009897862.1	pyruvate:ferredoxin (flavodoxin) oxidoreductase	pyruvate:ferredoxin			1	0.09	23
			K.ATPAAAMAK.F	886.4946	0.94		2
			K.AVFTEWLDSR.N	1250.6295	0.99		2
			K.FWGLGSDGTVGANK.Q	1463.7409	1.04		2
			K.LAEIIPEEDAVK.Y	1381.7705	1.06		2
			K.QFPEEADGLFAK.A	1406.7082	1.01		2
			K.TVFDNLVSEQPK.N	1431.761	1.05		2
			K.VAGELLPGVFHVSAR.A	1578.8882	0.92		3
			K.VVTQLYGDR.M	1077.5819	1.05		2
			K.YYQNIVGIVEK.Y	1380.7653	0.95		2
			R.ALASQALSIFGDHQDVMAAR.Q	2129.0769	0.75		3
			R.ATYLIDEADYIACHK.Q	1838.8954	0.88		3
			R.DNALSPNHPVAR.G	1317.679	1		2
			R.DNALSPNHPVAR.G	1317.679	1.07		3
			R.GTAQNPDIYFQTR.E	1537.7525	1.08		2
			K.HSLFDYYGAEDAK.Y	1570.7304	0.00		2
			K.LGQEIGLGNR.I	1083.6037	0.00		2
			K.QSYVYQYDLLK.G	1474.7708	0.00		2
			R.ALASQALSIFGDHQDVM(15.995)AAR.Q	1829.8982	0.00		3
			R.ALASQALSIFGDHQDVMAAR.Q	2129.0769	0.00		2
			R.TVANEAQAVACGYWHLYR.F	2137.0245	0.00		3
WP_009898027.1	HAD family phosphatase	HAD			1	0.06	2
			K.ILENLLEVR.E	1125.6758	0.96		2
			K.NMIEFMER.K	1096.5045	1.05		2
			K.EIYTSVMGR.N	1082.543	0.00		2
			K.VEGIIFDM(15.995)DGVLFDSER.I	950.4783	0.00		2
WP_009901540.1	recombination mediator RecR	recombination			1	0.00	2
			-.MQVYTGPITR.L	1192.6274	1		2
			R.DSSVICVVEDPR.D	1402.6762	0.00		2
WP_009901694.1	nickel pincer cofactor biosynthesis protein LarB	nickel			1	0.16	23
			K.IVIATGGTSDIPVADEAYHTAK.F	2285.1984	0.82		3
			R.IYDVGVAGIHR.L	1226.6772	1		3
			R.NGYPEVIYCEGK.S	1483.7017	1.13		2
			K.FLGNDVDR.I	962.4821	0.00		2
			K.IQNHDIENIGK.G	1335.7147	0.00		3
			K.LKDLPYEDLGYANIDHHR.E	2225.131	0.00		4
			K.SSNILGTR.C	874.4872	0.00		2
WP_032507408.1	diphthine--ammonia ligase	diphthine--ammonia			1	0.16	2
			K.DGYGYLEIK.-	1112.5754	1.04		2
			K.DSILALNR.M	928.5342	1.06		2
			K.FVMSFSGGK.D	1014.5208	0.96		2
			K.KPVEYEVK.G	1074.6325	0.71		2
			K.NAGADPCGEHGEYHTFVVDGPIFK.K	2673.2363	0.00		4
			K.SWTHNLEYNMLK.Q	1590.7865	0.00		3
WP_003419857.1	Fis family transcriptional regulator	Fis			1.01	0.09	2
			K.ELADICTPVK.M	1200.6424	1.01		2
			K.IGETISEK.S	931.5226	0.97		2
			K.SVYSLVLK.D	963.6005	1.15		2
WP_003421079.1	HAD-IB family hydrolase	HAD-IB			1.01	0.00	2
			R.VGNPIAINPTK.E	1178.7023	1.01		2
			K.NNAINDFVVK.Y	1188.6503	0.00		2
			K.TCINFTSDQVIK.L	1480.7596	0.00		2
			R.DTFMDWDKR.Q	1268.586	0.00		3
WP_003427766.1	isocaprenoyl-CoA:2-hydroxyisocaproate CoA-transferase HadA	isocaprenoyl-CoA:2-hydroxyisocaproate			1.01	0.2	23
			K.DKPGFDYTAYFAR.G	1605.7827	1.6		2
			K.DKPGFDYTAYFAR.G	1605.7827	1.27		3
			K.IEPIEGDGIR.V	1125.603	1.01		2
			K.IVGEAMLEK.T	1044.5889	1.01		2
			K.LLSEADIFVTNVR.V	1503.8297	0.8		2
			K.MGIAYDQIK.D	1093.5842	0.99		2
			K.SKEGVEILHK.L	1222.7285	1.09		3
			K.SLGYDEEK.I	995.4811	1.01		2
			K.TYDSGNTGVLVNTPVMFR.N	1998.9914	0.98		2
			K.VGQHTVEVLK.S	1164.6867	0.89		2
			K.VVELSSFIAAPCCAK.M	1706.8736	0.88		2
			K.VVELSSFIAAPCCAK.M	1706.8736	0.9		3
			R.ENPNSPLMTTYK.C	1449.7174	1.01		2
			R.GGVSQSVMEK.G	1076.5536	1.01		2
			G.MGTMITTAQYGNEMPLSR.E	2028.9512	0.00		2
			K.IVGEAM(15.995)LEK.T	646.336	0.00		2
			K.MLGDWGAEVIK.I	1273.674	0.00		2
			K.SKEGVEILHK.L	1222.7285	0.00		2
			K.SPASDDENPMFELENGNK.K	2049.9031	0.00		2
			K.SPASDDENPMFELENGNKK.G	2206.0293	0.00		3
			K.TYDSGNTGVLVNTPVM(15.995)FR.N	1694.8185	0.00		2
			R.ENPNSPLM(15.995)TTYK.C	928.4324	0.00		2
			R.GGVSQSVM(15.995)EK.G	791.3847	0.00		2
			R.WIQLALIQYNK.W	1444.8442	0.00		2
WP_003428216.1	ribonuclease Y	ribonuclease			1.01	0.00	2
			K.LEEIANSYEGVEK.S	1535.7719	1.01		2
			K.SFAIQAGR.E	876.4818	0.00		2
WP_003429300.1	membrane protein insertase YidC	membrane			1.01	0.00	2
			K.AMQDIQPR.I	985.5015	1.01		2
			K.AM(15.995)QDIQPR.I	248.1195	0.00		2
WP_003430074.1	TerD family protein	TerD			1.01	0.02	2
			K.DGSWQFK.A	922.4549	1.03		2
			K.DLIYFGNLK.S	1137.6434	1.02		2
			K.TTLIVGAIYR.K	1133.6808	1		2
			R.IECAYGI.-	852.4051	1		2
			K.YNLSDNYSEK.T	1287.5983	0.00		2
WP_003434506.1	dihydroorotate dehydrogenase electron transfer subunit	dihydroorotate			1.01	0.00	2
			K.MGQFYMLR.A	1072.5198	1.01		2
			K.ILENIYIGEDMYR.M	1655.8229	0.00		2
WP_003435668.1	50S ribosomal protein L6	50S			1.01	5.28	234
			K.EENTIMVERPTDNKK.H	1886.9772	0.93		2
			K.EENTIMVERPTDNKK.H	1886.9772	1.03		3
			K.EENTIMVERPTDNKK.H	1886.9772	1.02		4
			K.GIDKQLVGNYAAK.I	1459.8399	1.09		3
			K.KEENTIMVER.P	1303.6806	1.01		3
			K.KEENTIMVERPTDNKK.H	2044.1068	0.9		3
			K.KEENTIMVERPTDNKK.H	2044.1068	0.96		4
			K.QLSAELNIK.K	1070.6336	1.12		2
			K.QLVGNYAAK.I	1018.5811	0.95		2
			K.YVDEVIR.R	920.4967	1.01		2
			R.SLHGLTR.T	810.4712	20		2
			R.TLLDNMVVGVNTGFEK.K	1791.9441	0.71		2
			R.TLLDNMVVGVNTGFEK.K	1791.9441	0.71		3
			K.EENTIMVER.P	1147.5543	0.00		2
			K.EENTIMVERPTDNK.K	1730.8509	0.00		3
			K.GIDKQLVGNYAAK.I	1459.8399	0.00		2
			K.QLSAELNIKK.E	1226.7598	0.00		3
			R.IGVKPIIIPAGVEVTIAEGNLVTVK.G	2614.6118	0.00		3
			R.TLLDNM(15.995)VVGVNTGFEK.K	733.368	0.00		2
			R.TLLDNM(15.995)VVGVNTGFEK.K	733.368	0.00		3
WP_009895750.1	cell division protein ZapA	cell			1.01	0.14	23
			K.AYDLQLK.C	905.5222	1.03		2
			K.KQEIFELSNTTEGSR.A	1793.9159	1.26		3
			R.ATIAENLASEFQNK.A	1590.8253	0.99		2
			R.ATIAENLASEFQNK.A	1590.8253	0.96		3
			K.IEELSTQLEEANER.A	1687.8265	0.00		2
			K.LTIAEKEAENR.E	1328.73	0.00		2
			K.NKIEELSTQLEEANER.A	1958.999	0.00		3
			R.AELDAYK.N	864.4593	0.00		2
WP_009898069.1	bifunctional acetaldehyde-CoA/alcohol dehydrogenase	bifunctional			1.01	0.15	2
			K.AVTDLLDEMNIK.H	1416.7534	0.98		2
			K.ETGMGIAEDK.V	1105.5325	0.93		2
			K.IFATYSQEQVDK.I	1483.7559	1.01		2
			K.LAGFEVPVDTK.V	1230.686	1.3		2
			K.SIFEYLPR.A	1051.5702	1.02		2
			K.EFGVEESK.F	979.4862	0.00		2
			K.EQVIIENK.K	1027.5914	0.00		2
			K.EQVIIENKK.E	1183.7176	0.00		2
			K.ETGM(15.995)GIAEDK.V	464.1941	0.00		2
			K.EVDLTLATGGPGM(15.995)VK.S	1287.6381	0.00		2
			K.HTTFFEVEPDPTLECAK.I	2076.9908	0.00		3
			K.IVGQTACTIAK.L	1216.6849	0.00		2
			K.NHYASEYIYNAYK.E	1690.7991	0.00		2
			R.ILINTPSSQGGIGDLYNFK.L	2093.1238	0.00		2
			R.NGIIFSPHPR.A	1164.6404	0.00		2
WP_009903228.1	TetR/AcrR family transcriptional regulator	TetR/AcrR			1.01	0.00	2
			R.LYNDGFYGYEVK.N	1522.7344	1.01		2
			K.ALIEEGNQDNSMQVK.N	1730.8509	0.00		2
WP_025992033.1	nucleotide exchange factor GrpE	nucleotide			1.01	0.11	23
			K.ETIGVFANEK.I	1162.6234	0.94		2
			K.FGVEEIEAESK.E	1292.65	1.03		2
			K.GISLVHK.Q	808.5171	1.09		2
			K.IITELIPVIDSMER.A	1655.9168	0.79		2
			K.LQDELDELNDKYQR.L	1833.9109	1.22		3
			K.QLIDTLVK.F	984.6219	1.01		2
			K.TDEKEVDDENVTDINSK.L	2034.9674	1.11		3
			K.VVRPSMVK.V	970.5998	0.99		2
			R.ALDACEDKEDTMYK.G	1771.8008	1		3
			R.LQAEYANYR.R	1154.572	1.02		2
			R.TQQEKETIGVFANEK.I	1804.9571	1.01		3
			K.EVDDENVTDINSK.L	1532.7206	0.00		2
			K.IITELIPVIDSM(15.995)ER.A	1370.7731	0.00		2
			K.KLQDELDELNDKYQR.L	1991.0405	0.00		3
			K.KLQDELDELNDKYQR.L	1991.0405	0.00		4
			K.LQDELDELNDK.Y	1386.6878	0.00		2
			K.TDEKEVDDENVTDINSK.L	2034.9674	0.00		2
			R.ALDACEDKEDTM(15.995)YK.G	1452.6113	0.00		2
			R.ALDACEDKEDTMYK.G	1771.8008	0.00		2
			R.TQQEKETIGVFANEK.I	1804.9571	0.00		2
WP_003416871.1	glycine/sarcosine/betaine reductase component B subunit	glycine/sarcosine/betaine			1.02	0.14	23
			K.AAMYLGEVAR.N	1107.5747	1.03		2
			K.DGVLFINK.Q	960.5644	1.05		2
			K.DIQFGDVTEVK.D	1305.6816	1.11		2
			K.EYPELPK.V	930.5062	1.08		2
			K.GVAVVTTGK.I	886.5488	0.96		2
			K.IVGFQEGIIDMTGEGAK.Y	1819.939	0.84		2
			K.IVGFQEGIIDMTGEGAK.Y	1819.939	0.84		3
			K.LNNVVVIAEPIDGLK.Q	1648.9764	0.92		2
			K.QEMLQEIGGDEHIK.S	1681.8345	1.04		3
			K.TVIVTDEYAGR.D	1250.6507	1.09		2
			K.VIGHLEVVDVIAGGSDGSLR.A	2021.0987	0.58		3
			R.ADAVVTGGNANQVVVLPK.L	1807.0204	1		2
			R.DGGSQSLADADVR.A	1317.6161	1.02		2
			R.ITPVKDVIEPR.V	1321.7969	1.09		2
			R.ITPVKDVIEPR.V	1321.7969	1.02		3
			K.DINFVGVIITNENVYLADKER.S	2478.32	0.00		3
			K.IEMQGVK.T	859.4837	0.00		2
			K.IVGFQEGIIDM(15.995)TGEGAK.Y	1248.6424	0.00		2
			K.IVGFQEGIIDM(15.995)TGEGAK.Y	1248.6424	0.00		3
			K.LNNVVVIAEPIDGLK.Q	1648.9764	0.00		3
			K.QEMLQEIGGDEHIK.S	1681.8345	0.00		2
			K.SIDIELARPGESVR.I	1568.8522	0.00		2
			K.VEGNGGIFPGIMSK.V	1460.7697	0.00		2
			R.ADAVVTGGNANQVVVLPK.L	1807.0204	0.00		3
			R.NLTPDEVSVYETK.P	1549.7876	0.00		2
WP_003418356.1	dihydropteroate synthase	dihydropteroate			1.02	0.17	2
			K.QVEVLEAIK.M	1083.654	0.71		2
			R.DGEEIMTWGIK.L	1333.6588	1.07		2
			R.MAYCQEILEK.G	1339.6516	1		2
			R.TNAKPIINSADAGSR.F	1569.8475	1.04		2
			K.LLQSEFNNVPIALDTANKK.A	2199.2344	0.00		3
			R.M(15.995)AYCQEILEK.G	177.0824	0.00		2
			R.TNAKPIINSADAGSR.F	1569.8475	0.00		3
WP_003419057.1	septum site-determining protein MinD	septum			1.02	0.18	23
			K.SLAGQAYK.N	892.5018	1.06		2
			K.TTTAANLGTALSLENKK.T	1816.0306	0.92		3
			R.AIVVTNPEISAVR.D	1395.8086	1.03		2
			R.FDNLYLLPAAQTR.D	1548.83	1.02		2
			R.IIGLLEANEIK.E	1267.7751	1.02		2
			R.IVYDIVDVVEGTCR.L	1664.8444	0.56		2
			R.IVYDIVDVVEGTCR.L	1664.8444	0.77		3
			K.GEPAILDSK.S	984.5492	0.00		2
			K.TTTAANLGTALSLENK.K	1659.9043	0.00		2
			R.NLDVVM(15.995)GLENR.I	717.3731	0.00		2
			R.NLDVVMGLENR.I	1286.6653	0.00		2
WP_003421962.1	type I glyceraldehyde-3-phosphate dehydrogenase	type			1.02	0.06	2
			K.AIGLVIPSLK.G	1065.7162	0.98		2
			K.NVTVEEINAAMK.E	1373.7225	1.11		2
			K.VVISAPATGDLK.T	1225.7282	1		2
			R.AAAGNIVPNTTGAAK.A	1410.7831	1.05		2
			R.TLGYFAQLAK.-	1166.6699	0.00		2
WP_003425850.1	F0F1 ATP synthase subunit beta	F0F1			1.02	0.12	23
			K.TALVFGQMNEPPGAR.M	1614.8188	1.09		2
			K.VVDLLAPYLK.G	1185.7373	0.96		2
			R.CIAMSATDGLVR.G	1320.653	1.04		2
			R.GMEVVDTGGPISVPVGDETLGR.I	2213.1079	0.8		2
			R.ILDPSIVGK.E	996.6219	1.09		2
			R.QISSLGIYPAVDPLESTSR.I	2061.0823	0.82		2
			R.TREGNDLYGEMSESGVINK.T	2155.0297	1.02		3
			K.QHGGISVFSGVGER.T	1456.7423	0.00		3
			K.TALVFGQM(15.995)NEPPGAR.M	893.4681	0.00		2
			K.TALVFGQMNEPPGAR.M	1614.8188	0.00		3
			K.TVLIQELINNIAK.Q	1523.9287	0.00		2
			K.VVQIVGAVLDVK.F	1294.8224	0.00		2
			R.CIAM(15.995)SATDGLVR.G	521.2342	0.00		2
			R.EGNDLYGEMSESGVINK.T	1896.8775	0.00		2
			R.GM(15.995)EVVDTGGPISVPVGDETLGR.I	234.1038	0.00		2
			R.MPSAVGYQPTLATEMGALQER.I	2278.1167	0.00		2
			R.MPSAVGYQPTLATEMGALQER.I	2278.1167	0.00		3
			R.QISSLGIYPAVDPLESTSR.I	2061.0823	0.00		3
WP_003428415.1	transcription antitermination factor NusB	transcription			1.02	0.00	2
			K.VDVSILR.L	828.5069	1.02		2
			K.LEDTEIEDVIDKK.Y	1629.8713	0.00		3
			K.VSINEAVELAK.I	1227.7075	0.00		2
			R.YKELALQYSK.N	1325.7595	0.00		3
WP_003430279.1	tRNA pseudouridine(38-40) synthase TruA	tRNA			1.02	0.05	2
			K.LGDNNMTIQEK.L	1317.6599	0.95		2
			K.MIVAYDGSR.Y	1038.5168	1.04		2
			K.MTNETVEIIGSGR.T	1433.7184	1.02		2
			K.ASEYLVGEHDFTSFASSK.S	2030.9666	0.00		3
			K.M(15.995)TNETVEIIGSGR.T	177.0824	0.00		2
WP_003431138.1	ribulose-phosphate 3-epimerase	ribulose-phosphate			1.02	0.08	23
			K.AGVVLNPATPVDTIK.H	1549.9079	1.05		2
			K.AGVVLNPATPVDTIK.H	1549.9079	1.02		3
			K.LAPSILSADFAK.L	1287.7438	0.96		2
			K.NASLEELV.-	901.4757	1.14		2
			R.KNASLEELV.-	1057.6019	0.95		2
WP_003432043.1	TrmB family transcriptional regulator	TrmB			1.02	0.00	2
			K.ESPLTGYEISK.L	1278.6707	1.02		2
WP_003434148.1	triose-phosphate isomerase	triose-phosphate			1.02	0.18	2
			K.GAFTGEVSPLMLK.E	1404.7687	1.07		2
			K.GLYGELANEVR.I	1247.651	1.04		2
			K.TATAEDANDVISYIR.E	1665.821	1.01		2
			K.VVVAYEPIWAIGTGK.T	1657.9443	0.69		2
WP_003434235.1	protein jag	protein			1.02	0.07	23
			K.AIAELNLK.A	926.5801	1.1		2
			K.DGTYEIFVIER.E	1368.6925	0.89		2
			K.EAASLIGR.R	843.4814	1.01		2
			K.GFLGFIGAK.D	964.5746	1.02		2
			K.YVITYSEGTDPYRR.L	1746.8577	1.04		3
			R.RIIHSALQNDK.Y	1349.7779	0.95		3
			R.VLVDIENYR.S	1147.6237	1.05		2
			K.KLDYMNPYER.R	1383.6857	0.00		2
			K.YVITYSEGTDPYR.R	1590.7566	0.00		2
WP_003434417.1	ribosome-associated translation inhibitor RaiA	ribosome-associated			1.02	0.24	23
			-.MNIIISGK.Q	930.5572	1.01		2
			K.LDNYIHPDTDVK.V	1484.7511	0.97		2
			K.LDNYIHPDTDVK.V	1484.7511	0.91		3
			K.NIDSDEIAVVYK.R	1420.745	1.06		2
			K.NIDSDEIAVVYKR.N	1576.8461	1.06		2
			K.NIDSDEIAVVYKR.N	1576.8461	1.04		3
			K.QIELTDAIK.N	1085.6332	1.03		2
			R.AEDMQENLYTAIDVVYDK.L	2173.033	0.51		2
			R.AEDMQENLYTAIDVVYDK.L	2173.033	0.45		3
			R.NNGGYGIIEHE.-	1229.5677	1.13		2
			R.AEDM(15.995)QENLYTAIDVVYDK.L	492.189	0.00		2
WP_003435286.1	TetR/AcrR family transcriptional regulator	TetR/AcrR			1.02	0.03	2
			K.NILTAFIR.Q	974.5913	1		2
			R.EVGFEAVNAR.S	1118.572	1.04		2
WP_003438268.1	GTP-sensing pleiotropic transcriptional regulator CodY	GTP-sensing			1.02	0.08	23
			K.FSDEYTQNVLK.I	1398.7031	0.94		2
			K.ILEIFPEEHGR.L	1366.7245	1.06		3
			K.YTTVVPILGSGQR.L	1417.7929	0.97		2
			R.AIGEELEEEMR.K	1332.6231	1.12		2
			K.IDETLENLNGEK.I	1429.73	0.00		2
			R.KFESAGVIESR.S	1277.698	0.00		3
WP_003438469.1	GntR family transcriptional regulator	GntR			1.02	0.08	2
			K.IALDIANK.I	912.5644	1.04		2
			K.ILEDIGVVK.S	1040.6481	1.02		2
			K.YIGQTAAQTK.F	1135.6237	0.9		2
			K.GVIVLSPDK.A	982.6063	0.00		2
			K.IYTGEIQEDSVLFGR.S	1753.8887	0.00		2
			R.DITNISSYK.S	1095.5812	0.00		2
WP_004454488.1	flavodoxin family protein	flavodoxin			1.02	0.03	2
			K.LGASVVSCR.R	975.5172	1.04		2
			R.LFFIAGSR.M	937.5385	1		2
			K.TEILYLGK.E	991.5954	0.00		2
WP_004454870.1	hypothetical protein	hypothetical			1.02	0.01	23
			K.QDATNIVEQAK.K	1271.6721	1.01		2
			R.IQQEYQDNIEELKK.N	1861.9867	1.02		3
			K.QDATNIVEQAKK.E	1427.7984	0.00		3
			R.TLIPEEVTQAVWINK.E	1797.0117	0.00		3
WP_009887863.1	elongation factor Tu	elongation			1.02	0.16	234
			K.LLDQAQAGDNIGALLR.G	1694.9315	0.95		2
			K.VQDEVELVGLTEAPR.K	1681.8887	1.13		2
			K.VQDEVELVGLTEAPR.K	1681.8887	1.03		3
			R.GITISTAHVEYETPNR.H	1814.9163	1		3
			R.GSALMALEDPK.S	1186.6268	1.17		2
			R.HYAHVDCPGHADYVK.N	1824.8447	1.2		4
			R.TTDVTGACK.L	1007.4958	0.89		2
			R.YQLGEAVDFANIDKAPEER.E	2221.1096	0.73		3
			K.TTLTAAITK.T	974.6012	0.00		2
			R.DLLTEYDFPGDDTPIVR.G	1993.9714	0.00		2
			R.GITISTAHVEYETPNR.H	1814.9163	0.00		2
			R.HYAHVDCPGHADYVK.N	1824.8447	0.00		2
			R.HYAHVDCPGHADYVK.N	1824.8447	0.00		3
			R.KLLDQAQAGDNIGALLR.G	1852.0612	0.00		3
WP_009889023.1	elongation factor P	elongation			1.02	0.17	234
			-.MVSAGDFR.K	909.4378	1.02		2
			-.MVSAGDFRK.G	1065.5641	0.95		2
			K.AATVETGAVVQVPLFINTGDK.V	2186.2028	0.46		3
			K.ENEVATIR.F	958.5084	1.03		2
			K.FLKENEVATIR.F	1374.7871	1.01		2
			K.FLKENEVATIR.F	1374.7871	1.02		3
			K.TGAIREESFNPSEK.F	1619.8155	1.14		2
			K.TGAIREESFNPSEK.F	1619.8155	1.07		3
			K.TGAIREESFNPSEKFPK.A	2021.0663	0.97		3
			K.TGAIREESFNPSEKFPK.A	2021.0663	1.02		4
			R.EESFNPSEK.F	1121.5241	0.95		2
			R.EESFNPSEKFPK.A	1521.7715	0.84		3
			R.TGEYLSR.V	852.4341	1.09		2
			-.M(15.995)VSAGDFR.K	177.0824	0.00		2
			-.M(15.995)VSAGDFRK.G	177.0824	0.00		2
			K.AATVETGAVVQVPLFINTGDK.V	2186.2028	0.00		2
			K.DGQPCLVVDFQHVKPGK.G	2008.0645	0.00		3
			K.DGQPCLVVDFQHVKPGK.G	2008.0645	0.00		4
			R.TGEYLSRV.-	951.5025	0.00		2
WP_009889030.1	16S rRNA processing protein RimM	16S			1.02	0.03	2
			K.FVPTIDIDER.K	1231.6449	1.03		2
			K.MIIDPIK.G	884.5405	0.98		2
			K.VGQIVNTQGLK.G	1211.7238	1.02		2
			R.VYPLTDDIER.F	1247.6398	0.00		2
WP_009889331.1	helix-turn-helix transcriptional regulator	helix-turn-helix			1.02	0.05	2
			R.GLTSVATDSLGK.I	1203.6711	1.06		2
			R.LIEILPSK.S	967.6318	0.99		2
			K.TNLSIGFLSQLER.G	1504.8249	0.00		2
WP_009890867.1	cell division protein FtsZ	cell			1.02	0.00	2
			K.VIGVGGGGNNAVNR.M	1310.7055	1.02		2
WP_009892068.1	aminoacyl-tRNA hydrolase	aminoacyl-tRNA			1.02	0.05	2
			K.AADAIDSIIR.E	1071.5924	0.99		2
			K.EYNISVTK.I	1008.5492	1.06		2
			R.VGVSKPEAGQDLADFVLSR.F	2044.1034	0.00		3
WP_009897978.1	GntR family transcriptional regulator	GntR			1.02	0.00	2
			R.LQEQAYDYLK.E	1325.6867	1.02		2
			K.LASEIGISR.T	972.5604	0.00		2
			R.TTLIHMETPK.Y	1225.674	0.00		3
WP_009898301.1	phosphopyruvate hydratase	phosphopyruvate			1.02	9.54	23
			C.GVGDEGGFAPNLGSNR.E	1573.7485	20		2
			K.GIENGVANSILVK.V	1368.7977	1.01		2
			K.LQLVGDDLFVTNTER.L	1746.9152	0.7		2
			K.RAGYTAVISHR.S	1257.6942	1.03		3
			K.GLACGVGDEGGFAPNLGSNR.E	1975.9251	0.00		2
			R.AGYTAVISHR.S	1101.5931	0.00		2
			R.AIVPSGASTGAFEAVELR.D	1801.9574	0.00		2
			R.IEEMVGEQAR.Y	1188.5809	0.00		2
WP_009898446.1	pyrroline-5-carboxylate reductase	pyrroline-5-carboxylate			1.02	0.15	23
			K.AEDITVSDLSQVALDK.V	1758.9251	0.69		2
			K.DMVCSPAGTTIEAVK.V	1633.8055	1.03		2
			K.FASQAVMGSAK.M	1151.6009	1.03		2
			K.IIVSIAAGK.T	926.6165	0.9		2
			K.TIESLESFIGSDK.K	1480.7661	1.15		2
			K.TIESLESFIGSDKK.I	1636.8924	1.02		3
			K.VKEEFGVNTTTDSK.V	1637.8512	0.93		3
			K.DM(15.995)VCSPAGTTIEAVK.V	292.1093	0.00		2
			K.FASQAVM(15.995)GSAK.M	780.384	0.00		2
			K.MVLETGK.H	832.4728	0.00		2
			K.NSNVTDEELNM(15.995)IK.A	1292.5555	0.00		2
			K.NSNVTDEELNMIK.A	1561.7658	0.00		2
			K.VKEEFGVNTTTDSK.V	1637.8512	0.00		2
			R.VMPNTPALVGEGMSALCK.N	1930.976	0.00		2
			R.VMPNTPALVGEGMSALCK.N	1930.976	0.00		3
WP_009902746.1	cell wall-binding cysteine protease Cwp13	cell			1.02	0.05	2
			K.NQNDLIDGLAVGPLGAK.T	1749.9625	0.98		2
			K.TGSPVILVGDK.L	1140.6754	1.05		2
			K.NVSQIAVVNGVK.G	1282.7609	0.00		2
			K.SYIIGGTASLSNNLESK.L	1808.952	0.00		2
			K.TSLLLAQK.L	928.5957	0.00		2
WP_009902949.1	amino acid racemase	amino			1.02	0.00	2
			K.LIGILAGMGPR.S	1124.674	1.02		2
			K.CLAESVVNK.Y	1074.5743	0.00		2
contaminant_KERATIN03	no description	no			1.02	0.08	23
			K.GSLGGGFSSGGFSGGSFSR.G	1734.7962	1.02		2
			K.IRLENEIQTYR.S	1461.794	1.08		2
			K.IRLENEIQTYR.S	1461.794	0.85		3
			K.NHEEEMKDLR.N	1355.6504	0.93		3
			K.QSLEASLAETEGR.Y	1417.7049	1.02		2
			K.VTMQNLNDR.L	1117.555	0.94		2
			L.GGGFSSGGFSGGSFSR.G	1477.6586	0.98		2
			R.AETECQNTEYQQLLDIK.I	2139.0235	0.93		2
			R.AETECQNTEYQQLLDIK.I	2139.0235	0.93		3
			R.ALEESNYELEGK.I	1436.7035	0.93		2
			R.LAADDFR.L	834.4236	1.02		2
			R.LENEIQTYR.S	1192.6088	0.98		2
			R.LKYENEVALR.Q	1289.7343	1.02		2
			R.LKYENEVALR.Q	1289.7343	1.07		3
			R.QSVEADINGLR.R	1228.6412	1.06		2
			R.QSVEADINGLRR.V	1384.7423	1.08		3
			R.SLLEGEGSSGGGGR.G	1289.6212	1.07		2
			R.SQYEQLAEQNR.K	1392.6634	1.19		2
			R.SQYEQLAEQNRK.D	1548.7896	1.08		2
			R.SQYEQLAEQNRK.D	1548.7896	1.09		3
			R.VLDELTLTK.A	1086.6536	0.94		2
			K.DAEAWFNEK.S	1164.5451	0.00		2
			K.ELTTEIDNNIEQISSYK.S	2053.0296	0.00		2
			K.HYSSSRSGGGGGGGGCGGGGGVSSLR.I	2295.024	0.00		3
			K.NHEEEMKDLR.N	1355.6504	0.00		2
			K.SKELTTEIDNNIEQISSYK.S	2296.1879	0.00		3
			K.YENEVALR.Q	1020.524	0.00		2
			R.LASYLDK.V	864.4957	0.00		2
			R.NVSTGDVNVEM(15.995)NAAPGVDLTQLLNNM(15.995)R.S	1191.5442	0.00		3
			R.QSVEADINGLRR.V	1384.7423	0.00		2
			R.SGGGGGGGGCGGGGGVSSLR.I	1576.7012	0.00		2
contaminant_KERATIN05	no description	no			1.02	0.07	2
			K.DAEEWFFTK.T	1227.5812	1.02		2
			K.VTMQNLNDR.L	1117.555	0.94		2
			R.ALEEANADLEVK.I	1356.7137	1.06		2
			R.EVATNSELVQSGK.S	1416.746	0.89		2
			R.LAADDFR.T	834.4236	1.02		2
			R.GQVGGDVNVEM(15.995)DAAPGVDLSR.I	1131.523	0.00		2
			R.LASYLDK.V	864.4957	0.00		2
			R.LLEGEDAHLSSSQFSSGSQSSR.D	2337.0914	0.00		3
contaminant_KERATIN08	no description	no			1.02	0.06	2
			K.VTMQNLNDR.L	1117.555	0.94		2
			R.ALEEANADLEVK.I	1356.7137	1.06		2
			R.LAADDFR.T	834.4236	1.02		2
			R.GQTGGDVNVEM(15.995)DAAPGVDLSR.I	1133.5023	0.00		2
			R.LASYLDK.V	864.4957	0.00		2
contaminant_KERATIN13	no description	no			1.02	0.09	23
			K.AEAESLYQSK.Y	1180.5976	0.89		2
			K.LNDLEDALQQAK.E	1412.7511	1.06		2
			K.NMQDMVEDYR.N	1327.5537	1.06		2
			K.QISNLQQSISDAEQR.G	1743.8751	1.08		2
			K.SLNNQFASFIDK.V	1438.7456	1.03		2
			K.YEELQITAGR.H	1206.6245	1.04		2
			R.FLEQQNQVLQTK.W	1530.8406	0.98		2
			R.GGGGGGYGSGGSSYGSGGGSYGSGGGGGGGR.G	2411.9792	0.87		2
			R.GGGGGGYGSGGSSYGSGGGSYGSGGGGGGGR.G	2411.9792	1.02		3
			R.LRSEIDNVK.K	1128.6503	0.96		2
			R.NKYEDEINKR.T	1391.7409	0.91		3
			R.TLLEGEESR.M	1060.5401	1.19		2
			R.TNAENEFVTIK.K	1320.6925	0.91		2
			R.TNAENEFVTIKK.D	1476.8188	1.08		3
			K.DVDGAYM(15.995)TK.V	797.3266	0.00		2
			K.DVDGAYMTK.V	1054.5005	0.00		2
			K.KDVDGAYM(15.995)TK.V	953.4528	0.00		3
			K.NM(15.995)QDM(15.995)VEDYR.N	291.1253	0.00		2
			K.NMQDM(15.995)VEDYR.N	665.2513	0.00		2
			K.QISNLQQSISDAEQR.G	1743.8751	0.00		3
			K.SKAEAESLYQSK.Y	1423.7559	0.00		2
			K.SKAEAESLYQSK.Y	1423.7559	0.00		3
			R.DYQELM(15.995)NTK.L	825.3579	0.00		2
			R.DYQELMNTK.L	1196.5747	0.00		2
			R.FLEQQNQVLQTK.W	1530.8406	0.00		3
			R.GSYGSGGGSYGSGGSSYGSGGGGGGHGSYGSGSSSGGYR.G	3340.3355	0.00		3
			R.LRSEIDNVKK.Q	1284.7765	0.00		3
			R.NKYEDEINKR.T	1391.7409	0.00		2
			R.TNAENEFVTIKK.D	1476.8188	0.00		2
WP_003429376.1	MgtC/SapB family protein	MgtC/SapB			1.03	0.00	2
			K.ISNSTDSIEYIEGK.F	1610.8039	1.03		2
WP_003429754.1	ABC transporter ATP-binding protein	ABC			1.03	0.06	23
			K.QKPLQLSGGQQQR.V	1522.858	1.03		3
			R.LKDGVFTSEV.-	1149.6281	0.93		2
			R.YIFDGTDVTNLSENER.S	1900.8884	1.04		2
			K.QKPLQLSGGQQQR.V	1522.858	0.00		2
			R.EIMELLTR.L	1031.5685	0.00		2
WP_003430598.1	ribosome recycling factor	ribosome			1.03	0.17	23
			K.AAEEFKVR.I	1004.5655	1.12		2
			K.AIANSDLGLNPSNDGEVIR.L	1983.0102	1.05		2
			K.AIANSDLGLNPSNDGEVIR.L	1983.0102	1.06		3
			K.FEFGTIR.A	896.4756	1.06		2
			K.GGELTEDELK.K	1145.5816	0.91		2
			K.GGELTEDELKK.A	1301.7079	1.03		2
			K.GGELTEDELKK.A	1301.7079	1.03		3
			K.MTDKFIK.E	965.562	0.89		2
			R.ILMISPWDK.S	1157.6519	0.94		2
			R.LSVPALTEER.R	1141.6343	1.36		2
			R.VDYYGTPTPINQIGAISVPEPR.I	2415.2515	0.78		2
			R.VDYYGTPTPINQIGAISVPEPR.I	2415.2515	0.73		3
			K.EIDTLLSK.K	973.5696	0.00		2
			K.EIDTLLSKK.E	1129.6958	0.00		2
			K.EKDIMEV.-	918.4732	0.00		2
			K.MNGTIDALK.F	1017.5529	0.00		2
			K.SAMHEIEK.A	999.5059	0.00		2
			R.ANAQM(15.995)LDK.I	561.2581	0.00		2
			R.ANAQMLDK.I	945.4954	0.00		2
			R.ILM(15.995)ISPWDK.S	403.2505	0.00		2
WP_003431407.1	D-2-hydroxyacid dehydrogenase	D-2-hydroxyacid			1.03	6.72	23
			K.DGAYIVNTGR.G	1092.5564	1.2		2
			K.ILVFGAR.D	802.5065	1.1		2
			K.MNPGELTDPEINK.L	1512.7494	0.97		2
			R.AAALDTFETEGLFLNK.K	1795.9437	0.8		2
			R.AAALDTFETEGLFLNKK.M	1952.07	0.84		3
			R.DYEEPVIKK.W	1203.6751	20		3
			R.SITVGVIGTGK.I	1086.6649	1.09		2
[truncated: 723 more rows]

## Sheet: MM_MM ratios
Replicate 1 : MM expression
Accession	description	symbol	sequence	mass	median ratio	standard deviation	charge
WP_009892314.1	sulfurtransferase-like selenium metabolism protein YedF	sulfurtransferase-like			0.59	0.21	23
			K.GFIYTLTESKPYPK.Y	1727.9579	0.59		3
			K.LSAENEETIENLK.I	1544.7934	0.58		2
			R.GLACPKPVINTK.R	1380.8163	0.95		3
			K.GFIYTLTESKPYPK.Y	1727.9579	0.00		2
			K.YVLLVNGGVK.L	1116.6907	0.00		2
WP_009903017.1	threonine synthase	threonine			0.59	0.00	3
			K.IIVFFPEDGVSPVQK.L	1730.9688	0.59		3
			K.IIVFFPEDGVSPVQK.L	1730.9688	0.00		2
WP_003436135.1	zinc metalloprotease Zmp1	zinc			0.66	0.00	2
			K.TWDDVPGLGGSTVALR.I	1670.8628	0.66		2
			K.SACPQTYSFLQNLAK.-	1782.8975	0.00		2
WP_003437082.1	D-3-phosphoglycerate dehydrogenase	D-3-phosphoglycerate			0.71	0.33	23
			K.TLGLIGFGR.I	960.5757	0.48		2
			R.VSPTPHIGASTVEAQER.I	1805.9272	0.94		3
			R.FINTANVTM(15.995)R.D	1037.5216	0.00		2
			R.GGVGLDNIDVK.Y	1141.6343	0.00		2
			R.VSPTPHIGASTVEAQER.I	1805.9272	0.00		2
WP_003437535.1	NAD(+) synthase	NAD(+)			0.76	0.00	2
			K.FGDGGVDILPIANLTK.G	1684.94	0.76		2
WP_009903260.1	HAD family hydrolase	HAD			0.77	0.2	2
			K.FVGIPFIYAK.Y	1209.7162	0.91		2
			K.LFDDIEDTLK.L	1263.6598	0.63		2
			K.LINPIYVGDTQGDANSAK.F	1932.0034	0.00		2
			K.LINPIYVGDTQGDANSAK.F	1932.0034	0.00		3
			R.NKLINPIYVGDTQGDANSAK.F	2202.1726	0.00		3
WP_003438808.1	4-hydroxy-tetrahydrodipicolinate reductase	4-hydroxy-tetrahydrodipicolinate			0.81	0.17	2
			K.EVLPNVENNYGR.Y	1430.7154	0.69		2
			R.GIFASGSIAAAK.Y	1147.6601	0.93		2
			K.QKPGFYNM(15.995)DSM(15.995)LG.-	1039.5161	0.00		2
			K.VIATGYDGK.M	978.5386	0.00		2
WP_003417090.1	trigger factor	trigger			0.82	0.00	2
			R.IVIETQYGK.G	1105.6383	0.82		2
			K.VENTVSDENVDAK.L	1474.7151	0.00		2
WP_009901694.1	nickel pincer cofactor biosynthesis protein LarB	nickel			0.82	0.00	3
			K.IVIATGGTSDIPVADEAYHTAK.F	2285.1984	0.82		3
			K.IQNHDIENIGK.G	1335.7147	0.00		2
			K.IQNHDIENIGK.G	1335.7147	0.00		3
			R.IYDVGVAGIHR.L	1226.6772	0.00		3
WP_009903233.1	alanine--glyoxylate aminotransferase family protein	alanine--glyoxylate			0.82	0.05	23
			K.AISAPAGLTIVGISQDAK.N	1767.0142	0.85		2
			K.AISAPAGLTIVGISQDAK.N	1767.0142	0.78		3
			K.INYAPGPTETRENVR.L	1743.8904	0.00		3
WP_003422320.1	ferredoxin	ferredoxin			0.83	0.00	2
			K.EAEEGCPVSAITVK.-	1544.7756	0.83		2
WP_003436669.1	bifunctional phosphoribosyl-AMP cyclohydrolase/phosphoribosyl-A	bifunctional			0.83	0.1	23
			K.KVGEESSEVIIASK.N	1558.8818	0.9		3
			K.VGEESSEVIIASK.N	1402.7555	0.76		2
			-.MDNKCNNVYSDEVEK.F	1927.8656	0.00		2
			-.MDNKCNNVYSDEVEK.F	1927.8656	0.00		3
			K.CNNVYSDEVEK.F	1411.629	0.00		2
			K.KVGEESSEVIIASK.N	1558.8818	0.00		2
			K.NNPVEGSYTNYLFEK.G	1830.8869	0.00		2
			R.SRQELWVKGETSGNTQK.V	2032.0783	0.00		3
			R.SRQELWVKGETSGNTQK.V	2032.0783	0.00		4
WP_009891694.1	TSUP family transporter	TSUP			0.83	0.00	3
			K.EGKLEEQSTPK.V	1328.7188	0.83		3
			K.FIKEDAYTK.K	1197.6645	0.00		3
			K.FIKEDAYTKK.A	1353.7908	0.00		3
			K.VAVTGFITDFFDTLGIGSFAPTIAM(15.995)SK.A	2619.3376	0.00		3
WP_003416187.1	5-methylthioadenosine/adenosylhomocysteine nucleosidase	5-methylthioadenosine/adenosylhomocysteine			0.84	0.01	23
			K.ASLEFYK.G	912.4957	0.85		2
			R.VVTGDKFINSK.E	1290.7547	0.83		3
WP_003428442.1	3-oxoacyl- 3-oxoacyl-	3-oxoacyl-			0.84	0.13	23
			K.AGVIGFTK.A	847.5167	0.95		2
			K.AVTKPMMK.K	988.5813	0.57		2
			K.IDILVNNAGITK.D	1325.7919	0.88		2
			K.VLSDDVKESTLANIPK.K	1812.0244	0.71		2
			K.VLSDDVKESTLANIPK.K	1812.0244	0.89		3
			R.NININAVAPGFIETDMTK.V	2004.0431	0.84		2
			R.NININAVAPGFIETDMTK.V	2004.0431	0.79		3
			-.M(15.995)INLTGQVAVVTGGSR.G	177.0824	0.00		2
			K.TKNEIESMGVK.C	1318.7166	0.00		3
			R.IINM(15.995)TSVVGIM(15.995)GNAGQTNYCASK.A	517.2934	0.00		3
			R.IINM(15.995)TSVVGIMGNAGQTNYCASK.A	517.2934	0.00		3
			R.NININAVAPGFIETDM(15.995)TK.V	1745.8658	0.00		2
			R.NININAVAPGFIETDM(15.995)TK.V	1745.8658	0.00		3
WP_003421125.1	30S ribosomal protein S13	30S			0.85	0.19	23
			K.AEINPDTR.I	942.4771	1.02		2
			K.ATANEILAK.A	985.5808	0.95		2
			R.IAGVDLPR.E	867.5178	0.61		2
			R.IKDLSEDQVNELR.K	1613.8625	0.75		3
WP_003439494.1	TerD family protein	TerD			0.85	0.16	23
			K.VTVLAGEIYR.R	1147.6601	0.81		2
			K.YNLQEDFSGK.V	1255.6085	0.71		2
			R.DQDFGQMNNSFIR.L	1598.7147	1.01		2
			R.GDLVYFGNLK.H	1180.6492	1.12		2
			R.LIDSNSKQELFK.Y	1504.8501	0.85		3
			K.KRDQDFGQMNNSFIR.L	1911.9455	0.00		3
			K.NLVVGLGWDM(15.995)NK.L	1130.5794	0.00		2
			K.NYDLDAFAIALTNQDK.M	1867.9397	0.00		2
			R.DQDFGQM(15.995)NNSFIR.L	867.3433	0.00		2
			R.GDLVYFGNLKHPSK.A	1657.9192	0.00		4
			R.LIDSNSKQELFK.Y	1504.8501	0.00		2
			R.VSLVKDNNPVK.N	1295.7813	0.00		2
WP_003432207.1	transporter substrate-binding domain-containing protein	transporter			0.86	0.06	2
			K.IEEFLNEASTEAASN.-	1651.7577	0.81		2
			K.KIEEFLNEASTEAASN.-	1807.884	0.9		2
			R.VGVQAGSIQEEYVVNTLK.M	1990.0816	0.00		2
			R.VGVQAGSIQEEYVVNTLK.M	1990.0816	0.00		3
WP_003436400.1	FAD-dependent oxidoreductase	FAD-dependent			0.86	0.02	23
			K.VVASETAIK.Y	972.5856	0.86		2
			R.LGVAVDGIEGDGK.A	1284.6925	0.88		2
			R.LGVAVDGIEGDGKAQK.V	1639.9145	0.84		3
			K.IKDLDIDTVCPGHGPVLTENPR.K	2502.2982	0.00		4
			K.VFSIGNIQNFDKEISSKDEGQR.I	2595.3374	0.00		4
			R.ANTQMVQDTSVK.I	1376.697	0.00		2
WP_004454825.1	recombination regulator RecX	recombination			0.86	0.00	2
			K.IVNTNVNLNK.C	1183.6925	0.86		2
			K.ALNILSHADQSEK.K	1480.7886	0.00		3
			K.SYNLVNDSVLAQK.I	1505.809	0.00		2
WP_003419930.1	NADH peroxidase	NADH			0.87	0.08	2345
			K.AFLGLLNR.Y	930.5651	0.99		2
			K.AKELGLDAIHDTVHEMCKDEAR.H	2622.2975	0.8		4
			K.AKELGLDAIHDTVHEMCKDEAR.H	2622.2975	0.83		5
			K.ELGLDAIHDTVHEMCKDEAR.H	2395.1341	0.82		3
			K.ELGLDAIHDTVHEMCKDEAR.H	2395.1341	0.88		4
			K.ELGLDAIHDTVHEMCKDEAR.H	2395.1341	1.02		5
			K.FAELLGEVVVADTKENLR.V	2059.1395	0.7		2
			K.FVCTVCGYIHEGDAAPAQCPVCK.V	2695.2096	0.83		3
			K.NWADEHR.I	954.4308	0.96		2
			K.RIALEEAEHAAK.F	1392.7725	0.88		3
			R.IALEEAEHAAK.F	1236.6714	0.8		2
			R.IALEEAEHAAK.F	1236.6714	0.87		3
			R.IGVAQGVDEEIIEGLR.A	1724.9309	0.97		2
			R.IGVAQGVDEEIIEGLR.A	1724.9309	0.97		3
			R.QADREGYPEVGEAYK.R	1766.8475	0.98		3
			R.QADREGYPEVGEAYKR.I	1923.952	0.87		3
			R.QADREGYPEVGEAYKR.I	1923.952	0.94		4
			R.VDAEYGATDGK.L	1180.5612	0.86		2
			R.VDAEYGATDGKLK.L	1449.7715	0.78		3
			R.VRVDAEYGATDGK.L	1435.7307	0.85		2
			R.VRVDAEYGATDGK.L	1435.7307	0.87		3
			R.VRVDAEYGATDGKLK.L	1704.941	0.87		2
			R.VRVDAEYGATDGKLK.L	1704.941	0.88		3
			R.VRVDAEYGATDGKLK.L	1704.941	0.9		4
			K.AKELGLDAIHDTVHEMCKDEAR.H	2622.2975	0.00		6
			K.ELGLDAIHDTVHEM(15.995)CKDEAR.H	1606.7661	0.00		3
			K.ELGLDAIHDTVHEM(15.995)CKDEAR.H	1606.7661	0.00		5
			K.FAELLGEVVVADTK.E	1545.8654	0.00		3
			K.FAELLGEVVVADTKENLR.V	2059.1395	0.00		3
			K.FVCTVCGYIHEGDAAPAQCPVCK.V	2695.2096	0.00		2
			K.FVCTVCGYIHEGDAAPAQCPVCK.V	2695.2096	0.00		4
			K.VGADKFEEMKGEK.N	1578.8327	0.00		3
			R.ANFVGECTEVGM(15.995)YLAM(15.995)SR.Q	1340.5741	0.00		2
			R.ANFVGECTEVGM(15.995)YLAM(15.995)SR.Q	1340.5741	0.00		3
			R.ANFVGECTEVGM(15.995)YLAMSR.Q	1340.5741	0.00		2
			R.ANFVGECTEVGMYLAM(15.995)SR.Q	1818.7991	0.00		2
			R.QADREGYPEVGEAYK.R	1766.8475	0.00		2
			R.QADREGYPEVGEAYKR.I	1923.952	0.00		2
			R.VDAEYGATDGKLK.L	1449.7715	0.00		2
WP_003420885.1	orotate phosphoribosyltransferase	orotate			0.87	0.15	23
			K.EAVFTER.K	878.4498	0.99		2
			K.EGKLPVVKPGSR.E	1349.8395	0.86		3
			K.IIIAEDVVTTGK.S	1313.7806	0.87		2
			R.EFKELGM.-	908.4677	0.88		2
			R.VLEALGGEVVGVACIADR.T	1854.9873	0.87		2
			R.VLEALGGEVVGVACIADR.T	1854.9873	0.55		3
			K.LDIQVYESDECPLCK.E	1924.8992	0.00		2
			R.QLGKEAVFTERK.D	1488.8664	0.00		3
WP_009889030.1	16S rRNA processing protein RimM	16S			0.87	0.17	23
			K.FVPTIDIDER.K	1231.6449	0.91		2
			K.FVPTIDIDERK.M	1387.7711	0.85		3
			K.MIIDPIKGMID.-	1300.7135	0.54		2
			K.VGQIVNTQGLKGEVR.V	1652.9574	0.89		3
			K.VGQIVNTQGLK.G	1211.7238	0.00		2
			K.VGQIVNTQGLKGEVR.V	1652.9574	0.00		2
WP_009889371.1	NADH peroxidase	NADH			0.87	0.08	2345
			K.AFLGLLNR.H	930.5651	0.99		2
			K.ELGLDAIHDTVHEMCKDEAR.H	2395.1341	0.82		3
			K.ELGLDAIHDTVHEMCKDEAR.H	2395.1341	0.88		4
			K.ELGLDAIHDTVHEMCKDEAR.H	2395.1341	1.02		5
			K.FAELLGEVVVADTKENLR.V	2059.1395	0.7		2
			K.FVCTVCGYIHEGDAAPAQCPVCK.V	2695.2096	0.83		3
			K.VGADKFEEMKGEMVWADEHR.I	2448.1647	0.77		4
			K.VGADKFEEMKGEMVWADEHR.I	2448.1647	0.73		5
			R.AKELGLDAIHDTVHEMCKDEAR.H	2622.2975	0.8		4
			R.AKELGLDAIHDTVHEMCKDEAR.H	2622.2975	0.83		5
			R.IAFEEAEHAAK.F	1270.6558	0.88		2
			R.IAFEEAEHAAK.F	1270.6558	0.87		3
			R.IGVAQGVDAEIIEGLR.A	1666.9254	0.96		2
			R.IGVAQGVDAEIIEGLR.A	1666.9254	0.92		3
			R.QADREGYPEVAEAYK.R	1780.8632	0.94		3
			R.QADREGYPEVAEAYKR.I	1937.9677	0.89		3
			R.QADREGYPEVAEAYKR.I	1937.9677	0.91		4
			R.VDAEYGATDGK.L	1180.5612	0.86		2
			R.VDAEYGATDGKLK.L	1449.7715	0.78		3
			R.VRVDAEYGATDGK.L	1435.7307	0.85		2
			R.VRVDAEYGATDGK.L	1435.7307	0.87		3
			R.VRVDAEYGATDGKLK.L	1704.941	0.87		2
			R.VRVDAEYGATDGKLK.L	1704.941	0.88		3
			R.VRVDAEYGATDGKLK.L	1704.941	0.9		4
			K.ELGLDAIHDTVHEM(15.995)CKDEAR.H	1606.7661	0.00		3
			K.ELGLDAIHDTVHEM(15.995)CKDEAR.H	1606.7661	0.00		5
			K.FAELLGEVVVADTK.E	1545.8654	0.00		3
			K.FAELLGEVVVADTKENLR.V	2059.1395	0.00		3
			K.FVCTVCGYIHEGDAAPAQCPVCK.V	2695.2096	0.00		2
			K.FVCTVCGYIHEGDAAPAQCPVCK.V	2695.2096	0.00		4
			K.VGADKFEEMKGEMVWADEHR.I	2448.1647	0.00		3
			R.AKELGLDAIHDTVHEMCKDEAR.H	2622.2975	0.00		6
			R.ANFTGECTEVGM(15.995)YLAM(15.995)SR.Q	1342.5533	0.00		2
			R.ANFTGECTEVGM(15.995)YLAM(15.995)SR.Q	1342.5533	0.00		3
			R.ANFTGECTEVGM(15.995)YLAMSR.Q	1342.5533	0.00		2
			R.ANFTGECTEVGMYLAM(15.995)SR.Q	1820.7783	0.00		2
			R.ANFTGECTEVGMYLAM(15.995)SR.Q	1820.7783	0.00		3
			R.EGYPEVAEAYKR.I	1466.7405	0.00		3
			R.QADREGYPEVAEAYKR.I	1937.9677	0.00		2
			R.VDAEYGATDGKLK.L	1449.7715	0.00		2
WP_003418897.1	3-hydroxybutyryl-CoA dehydrogenase	3-hydroxybutyryl-CoA			0.88	0.08	23
			K.LVEVISGQLTSK.V	1328.7915	0.83		2
			K.SINKVPVDVSESPGFVVNR.I	2099.1456	0.94		3
WP_003420966.1	phosphoribosylaminoimidazolesuccinocarboxamide synthase	phosphoribosylaminoimidazolesuccinocarboxamide			0.88	0.00	3
			K.KVEILPLEVIVR.N	1462.9487	0.88		3
			K.DLGDLVEGYTEVLSR.M	1692.857	0.00		2
			R.NIAAGSICK.R	988.5376	0.00		2
WP_003429162.1	orotidine-5-phosphate decarboxylase	orotidine-5-phosphate			0.88	0.1	23
			K.FHDIPNTMK.S	1157.5903	0.88		2
			K.LIVAIDTDEFDKAK.E	1660.9287	0.85		3
			K.VGLEQYVATK.G	1162.6598	0.87		2
			R.ESAINIVR.E	928.5342	1.08		2
			R.QCALIAR.E	858.4746	1.02		2
			R.QCALIAREEAER.L	1472.7406	1.02		3
			R.VVTPSDAIK.K	984.5856	0.85		2
			R.VVTPSDAIKK.G	1140.7118	0.84		2
			K.AENPRESAINIVR.E	1495.8107	0.00		3
			K.ESGIDGVVCSAQEVDK.I	1747.8298	0.00		2
			K.GKTIDYLKEK.G	1305.7908	0.00		3
			K.RVVTPSDAIKK.G	1296.8129	0.00		3
WP_003434107.1	MetQ/NlpA family ABC transporter substrate-binding protein	MetQ/NlpA			0.88	0.05	23
			K.EMNAEQLPTVLK.D	1427.7694	0.88		2
			K.FIQDEYKGSIVPAF.-	1668.8763	0.87		2
			K.ILEVAKPLLK.E	1206.8315	0.96		3
			K.ILVGASSNPHAK.I	1248.719	0.85		2
			K.ILVGASSNPHAK.I	1248.719	0.8		3
			K.VHIEPMGFYSEK.V	1491.7432	0.89		3
			K.SLDELKDGAVIAVPNDATNGAR.A	2282.1948	0.00		3
			K.VHIEPM(15.995)GFYSEK.V	752.3891	0.00		3
WP_004454497.1	sugar O-acetyltransferase	sugar			0.88	0.02	2
			K.DIPSNMIAYGNPCR.I	1634.7545	0.89		2
			K.ILNELLGGK.G	1011.6328	0.86		2
WP_009888867.1	electron transfer flavoprotein subunit beta/FixA family pro	electron			0.88	0.06	23
			K.DIEVDPSNLGLK.G	1354.7344	0.81		2
			K.GSPTSVFK.S	877.4909	0.96		2
			K.SVKPAGTIYNEDAK.T	1575.8508	0.91		2
			K.SVKPAGTIYNEDAK.T	1575.8508	0.92		3
			R.AFAGADTWATSSALAGALK.N	1864.9764	0.85		2
			R.QFEDCCHDLK.V	1406.5959	0.8		3
			K.QVPDTTEVKLDPNTGTLIR.D	2153.1773	0.00		3
			K.RQFEDCCHDLK.V	1562.697	0.00		3
			K.TSAGIIIDKLK.E	1241.7959	0.00		3
			R.AFAGADTWATSSALAGALK.N	1864.9764	0.00		3
WP_009903754.1	porphobilinogen synthase	porphobilinogen			0.88	0.00	2
			K.AGADMVAPSDMMDGR.I	1550.6527	0.88		2
WP_011860916.1	translation initiation factor IF-3	translation			0.88	0.05	23
			K.APAFEGNNMVVIIDPKK.-	1927.0682	0.83		3
			K.NLDLVQISPNANPPVCK.I	1935.0329	0.91		2
			K.NLDLVQISPNANPPVCK.I	1935.0329	0.93		3
			R.LRPGIEQNDLNTK.A	1552.8573	0.93		2
			R.LRPGIEQNDLNTK.A	1552.8573	0.93		3
			R.VLSPTGEQLGVMPTK.E	1611.8906	0.85		2
			R.VLSPTGEQLGVMPTK.E	1611.8906	0.82		3
			R.VLSPTGEQLGVMPTKEAQAMANSK.N	2571.3482	0.82		3
			K.APAFEGNNMVVIIDPK.K	1769.9386	0.00		2
			K.FLDIIKEFGEPTK.A	1619.9174	0.00		3
			R.VLSPTGEQLGVM(15.995)PTK.E	1257.6639	0.00		2
			R.VLSPTGEQLGVM(15.995)PTK.E	1257.6639	0.00		3
			R.VLSPTGEQLGVM(15.995)PTKEAQAM(15.995)ANSK.N	1257.6639	0.00		3
			R.VLSPTGEQLGVM(15.995)PTKEAQAMANSK.N	1257.6639	0.00		3
			R.VLSPTGEQLGVMPTKEAQAM(15.995)ANSK.N	2143.1098	0.00		3
WP_003420711.1	2-oxoacid:acceptor oxidoreductase family protein	2-oxoacid:acceptor			0.89	0.28	23
			K.EKFVPLNR.E	1057.6284	0.57		2
			K.EVSWLPSYGPEMR.G	1577.7548	0.97		2
			K.FKDDVIPGGK.I	1158.6649	0.91		2
			K.GMDATCSK.A	924.4045	0.22		2
			K.IIVNSSLIK.E	1041.6798	0.89		2
			K.IIVNSSLIKEK.V	1326.8486	0.89		3
			K.VSDTVDIESVLEAFKK.V	1864.0275	1		3
			K.EVSWLPSYGPEM(15.995)R.G	1421.6537	0.00		2
			K.EVSWLPSYGPEM(15.995)R.G	1421.6537	0.00		3
WP_003424711.1	sporulation transcription factor Spo0A	sporulation			0.89	0.04	23
			K.DGIEALDLVK.K	1127.6438	0.89		2
			K.ELYPSIAK.K	975.5641	0.82		2
			R.GKVDTINQLFGYTVHNTK.G	2119.1507	0.89		3
			K.DGIEALDLVKK.T	1283.7701	0.00		3
			K.IIVLSAVGQDK.I	1197.7333	0.00		2
			R.HAIEVAWSR.G	1095.5825	0.00		2
WP_003425856.1	F0F1 ATP synthase subunit delta	F0F1			0.89	0.12	2
			-.MINVIANR.Y	957.543	1.09		2
			K.NVTIENVVDK.T	1185.6605	0.88		2
			R.IGNEQIDGTVK.T	1228.6663	0.89		2
WP_009890640.1	DUF4342 domain-containing protein	DUF4342			0.89	0.04	2
			K.NMITNAAK.D	917.5004	0.92		2
			R.VPGATYAEAK.E	1061.5757	0.86		2
			K.DVKDVVVDKK.E	1255.7751	0.00		3
			K.VQNEEDGEIVDLGELNEEK.L	2215.0573	0.00		2
			M.SSNITIEM(15.995)VDSVFER.V	921.4477	0.00		2
WP_009902469.1	cysteine hydrolase	cysteine			0.89	13.51	23
			R.VIAFTDSHTPK.S	1270.6921	20		2
			R.VIAFTDSHTPK.S	1270.6921	0.89		3
			K.SYFNQHNIEK.N	1334.6619	0.00		2
			R.QGALYSPR.V	918.4923	0.00		2
WP_003417965.1	helix-turn-helix transcriptional regulator	helix-turn-helix			0.9	0.01	23
			K.QLSQLLEEPHAK.I	1447.8035	0.91		3
			K.VGILELVEEK.I	1183.7064	0.9		2
			K.QLSQLLEEPHAK.I	1447.8035	0.00		2
WP_003421190.1	transcription termination/antitermination factor NusG	transcription			0.9	0.11	23
			K.AMGIDTTDPK.V	1103.5533	0.9		2
			K.GVTGFVGPGSKPVPLSEDEVK.A	2183.1919	0.99		3
			K.VYPSYVLVK.M	1122.6689	0.87		2
			R.GMEDCIR.Q	907.3892	0.92		2
			R.KVYPSYVLVK.M	1278.7951	0.72		2
			R.QVVVPTEEVVETTK.T	1612.8924	0.91		2
			R.TLFVIELEGIEKI.-	1558.9222	0.7		2
			K.MIITDESWYVVR.N	1538.7803	0.00		2
			R.KVYPSYVLVK.M	1278.7951	0.00		3
WP_003425980.1	type III pantothenate kinase	type			0.9	0.08	23
			K.ISSEALFQSASK.L	1322.7082	0.93		2
			K.KQPLIVGPGIK.T	1232.822	0.89		3
			K.QPLIVGPGIK.T	1076.6958	1.07		2
			K.VIATGGLAK.L	884.5695	0.85		2
			R.VELAKPGMTICK.S	1429.8037	0.9		3
			K.ELNCDDVK.V	1047.4907	0.00		2
			K.ISSEALFQSASKLPR.V	1688.9461	0.00		3
WP_003429190.1	ATP-binding cassette domain-containing protein	ATP-binding			0.9	0.18	23
			K.GIGYAFQQPPR.I	1260.6615	1		2
			K.KGIGYAFQQPPR.I	1416.7878	0.61		3
			K.RIEIATLFAR.D	1216.7292	0.97		3
			R.IEIATLFAR.D	1060.6281	0.84		2
			K.LIVITGPNGGGK.S	1180.718	0.00		2
			K.RIEIATLFAR.D	1216.7292	0.00		2
WP_003430597.1	UMP kinase	UMP			0.9	0.16	23
			K.KFTELSYMEVIQK.E	1698.9266	0.61		3
			K.LSGEALAGER.G	1029.5455	1.04		2
			K.VFELTTENIIR.A	1361.7555	0.99		2
			R.AVKGENIGTTVK.-	1299.7762	0.79		2
			R.AVKGENIGTTVK.-	1299.7762	0.83		3
			R.VQTAIDMR.Q	960.5063	0.98		2
			K.VM(15.995)DSTATSLCM(15.995)DNKIPIK.V	276.1508	0.00		3
			K.VMDSTATSLCM(15.995)DNKIPIK.V	1242.5294	0.00		3
			R.AAEM(15.995)EAEVILLAK.N	448.1992	0.00		2
			R.AAEM(15.995)EAEVILLAK.N	448.1992	0.00		3
WP_003438086.1	FadR family transcriptional regulator	FadR			0.9	0.00	2
			R.VLETMGVIESR.Q	1260.6748	0.9		2
			R.QGEGNFICTNIEK.T	1564.7555	0.00		2
WP_004454488.1	flavodoxin family protein	flavodoxin			0.9	0.12	2
			K.LGASVVSCR.R	975.5172	0.98		2
			R.TLGENMAWLLK.C	1330.7319	0.81		2
			K.ETIPGCISCASCFETGK.C	1972.8774	0.00		2
			K.VLLINGSPNQYGCTYTALNEITK.V	2625.3554	0.00		3
WP_009888223.1	2-hydroxyisocaproyl-CoA dehydratase activator HadI	2-hydroxyisocaproyl-CoA			0.9	0.11	2
			R.GVNFIIPETR.T	1172.6554	0.98		2
			R.TIIDIGGQDAK.V	1185.6605	0.82		2
			K.NGEDIVASETISSGTGTTGPSR.V	2164.0325	0.00		2
WP_009897960.1	S-layer protein SlpA	S-layer			0.9	2.98	234
			A.DDTKVETGDQGYTVVQSK.Y	2054.0249	0.83		3
			K.AGETTYSTGLTFEDGSTEK.I	2049.946	0.92		2
			K.AGETTYSTGLTFEDGSTEK.I	2049.946	0.91		3
			K.ALKLTVVPGSK.A	1195.7904	20		3
			K.APLLLTSK.D	897.5899	0.87		2
			K.ASIADENSPVK.L	1185.6241	0.9		2
			K.ASIADENSPVKLTLK.S	1668.9662	1.1		2
			K.ASIADENSPVKLTLK.S	1668.9662	0.89		3
			K.DLKDYVDDLR.T	1306.6769	0.93		2
			K.DLKDYVDDLR.T	1306.6769	0.94		3
			K.ESSYYQDNLNNDKK.V	1800.853	0.96		3
			K.EVENELKDMGLK.V	1487.7905	0.88		2
			K.EVENELKDMGLK.V	1487.7905	0.91		3
			K.FAEKTPSASVQPVITK.L	1787.0274	0.85		3
			K.GIATSVINK.L	957.5859	0.9		2
			K.GILDGSITEIK.V	1200.6966	0.94		2
			K.IADEVGLDNDK.A	1243.6296	1.17		2
			K.KAPLLLTSK.D	1053.7162	0.86		2
			K.KVYLAGGVNSISK.E	1418.8497	0.82		2
			K.KVYLAGGVNSISK.E	1418.8497	0.9		3
			K.LAMSAIFDTAYTDSSETAVK.I	2177.0643	0.89		3
			K.LGDSDIIDITK.A	1244.6864	0.96		2
			K.LTVVPGSK.A	855.543	0.86		2
			K.MDLADGDATPIVVVDGK.A	1770.9074	0.93		2
			K.STTGINTSK.K	963.5237	1.02		2
			K.TDLNTLYK.V	1022.5648	0.91		2
			K.TPSASVQPVITK.L	1282.7497	0.93		2
			K.VGSELNAADASK.L	1216.6299	0.85		2
			K.VIKESSYYQDNLNNDKK.V	2170.1351	0.81		4
			K.VLDKDNGENLVQVGK.G	1710.9516	0.82		3
			K.VLNGDEADTNGLIEEVSGK.Y	2016.0092	0.9		2
			K.VLNGDEADTNGLIEEVSGK.Y	2016.0092	0.96		3
			K.VLTGSDNDKNK.L	1273.6878	0.85		3
			K.VVNFFVAK.D	978.5902	0.95		2
			K.VYLAGGVNSISK.E	1262.7234	0.85		2
			K.YQVVLYPEGKR.V	1406.7922	0.86		3
			K.YYNSDDENAIFR.D	1533.6736	1.03		2
			M.DLADGDATPIVVVDGK.A	1639.8669	0.84		2
			R.IINAKEETIDIDASSSK.T	1918.034	0.89		2
			R.IINAKEETIDIDASSSK.T	1918.034	0.88		3
			R.LAGDDRYETSLK.I	1422.7355	0.86		2
			A.DDTKVETGDQGYTVVQSK.Y	2054.0249	0.00		2
			A.DGDATPIVVVDGK.A	1340.7188	0.00		2
			I.IAGTSSADGVVTNTGAASGSTETNSAGTK.L	2668.2869	0.00		3
			K.ADMNDTKFGK.A	1209.6064	0.00		3
			K.AGETTYSTGLTFEDGSTEKIVK.L	2418.2247	0.00		3
			K.AVEQLQK.G	870.5175	0.00		2
			K.DLTGASADAIIAGTSSADGVVTNTGAASGSTETNSAGTK.L	3582.7214	0.00		3
			K.DVENAIDDATGK.S	1302.6303	0.00		2
			K.EETIDIDASSSK.T	1349.6562	0.00		2
			K.ESSYYQDNLNNDK.K	1644.7268	0.00		2
			K.ESSYYQDNLNNDKK.V	1800.853	0.00		2
			K.EVENELKDM(15.995)GLK.V	1161.5587	0.00		2
			K.FAEKTPSASVQPVITK.L	1787.0274	0.00		2
			K.IADEVGLDNDKAFVVGGTG.L	1932.9874	0.00		2
			K.LAM(15.995)SAIFDTAYTDSSETAVK.I	361.2035	0.00		2
			K.LAM(15.995)SAIFDTAYTDSSETAVK.I	361.2035	0.00		3
			K.LAMSAIFDTAYTDSSETAVK.I	2177.0643	0.00		2
			K.M(15.995)DLADGDATPIVVVDGK.A	177.0824	0.00		2
			K.VETGDQGYTVVQSK.Y	1565.7937	0.00		2
			K.VIKESSYYQDNLNNDK.K	2014.0088	0.00		3
			K.VIKESSYYQDNLNNDKK.V	2170.1351	0.00		3
			K.VLDKDNGENLVQVGK.G	1710.9516	0.00		2
			K.YQVVLYPEGKR.V	1406.7922	0.00		2
			R.NANGKM(15.995)DLADGDATPIVVVDGK.A	689.353	0.00		3
			R.NANGKMDLADGDATPIVVVDGK.A	2284.1814	0.00		3
			R.TYNNGYSNAIEVAGEDR.I	1899.8599	0.00		2
WP_009901573.1	adenylate kinase	adenylate			0.9	0.08	234
			K.GTQAAGIVEK.Y	1028.5866	0.9		2
			K.IEGVCDVCQGELYQR.A	1852.8448	0.96		2
			K.VVNIEVDK.S	970.5699	0.83		2
			K.YNIPHISTGDIFR.K	1559.8096	0.96		3
			K.YNIPHISTGDIFRK.N	1715.9359	1.09		3
			K.YNIPHISTGDIFRK.N	1715.9359	1.02		4
			R.IILLGPPGAGK.G	1090.7114	0.89		2
			R.IQVYLDETKPLVDYYSK.Q	2158.1643	0.84		3
			R.NVAQGEHLDIFLK.N	1538.8457	0.9		3
			K.NAGISLDK.V	872.4967	0.00		2
			K.NIKEGTELGK.K	1171.6812	0.00		2
			K.NIKEGTELGKK.A	1327.8075	0.00		3
			R.IILLGPPGAGKGTQAAGIVEK.Y	2074.2595	0.00		3
			R.ISQEDCKNGFMLDGFPR.N	2069.9744	0.00		3
WP_011861621.1	peptidoglycan editing factor PgeF	peptidoglycan			0.9	0.00	2
			R.IGTVLQIK.-	926.6165	0.9		2
			K.ENIINLNLCTSCR.A	1633.7916	0.00		2
			R.DGDALITNLEK.V	1243.666	0.00		2
WP_032507408.1	diphthine--ammonia ligase	diphthine--ammonia			0.9	0.00	2
			K.DGYGYLEIK.-	1112.5754	0.9		2
			K.HLGEEFLGK.K	1084.5917	0.00		2
WP_003416023.1	phosphate propanoyltransferase	phosphate			0.91	0.11	234
			-.MKLPIALSNK.H	1197.7519	1.06		3
			K.APIKESGDIAGTPGVK.L	1622.9243	0.87		2
			K.APIKESGDIAGTPGVK.L	1622.9243	0.9		3
			K.EGVIVASR.H	857.4971	0.99		2
			K.ESGDIAGTPGVK.L	1185.6241	0.89		2
			K.FKPLSQPGQYACEEK.V	1865.9427	0.96		3
			K.FKPLSQPGQYACEEKVDLVGPK.G	2602.391	0.75		3
			K.FKPLSQPGQYACEEKVDLVGPK.G	2602.391	0.68		4
			K.LVGPAGEVEMK.E	1184.6475	0.92		2
			K.LVGPAGEVEMKEGVIVASR.H	1997.1061	0.84		3
			K.NGDLVELIVD.-	1113.5918	1.03		2
			R.ALVFENVLVR.A	1186.7074	0.97		2
			-.M(15.995)KLPIALSNK.H	177.0824	0.00		3
			-.MKLPIALSNK.H	1197.7519	0.00		2
			K.FGVTDKQIVK.V	1217.7384	0.00		2
			K.LVGPAGEVEM(15.995)KEGVIVASR.H	1028.5212	0.00		3
			R.ASDSFNLEM(15.995)HVDM(15.995)EEGNAAGVK.N	1040.4485	0.00		3
			R.ASDSFNLEM(15.995)HVDMEEGNAAGVK.N	1040.4485	0.00		3
			R.HIHM(15.995)SNEDAAK.F	564.2842	0.00		3
			R.HIHMSNEDAAK.F	1307.6292	0.00		2
			R.HIHMSNEDAAK.F	1307.6292	0.00		3
WP_003424537.1	30S ribosomal protein S2	30S			0.91	0.09	23
			K.LITGAMATAVIEGR.Q	1429.7963	0.91		2
			R.CGMYFVNER.W	1202.5213	1.04		2
			R.KENIAIQEAHR.L	1363.7572	0.86		3
			K.QLLEAGVHFGHQTR.R	1619.8532	0.00		4
			R.NGIYIIDLQK.T	1231.7176	0.00		2
			R.WLGGMLTNHK.T	1211.6485	0.00		3
WP_003427766.1	isocaprenoyl-CoA:2-hydroxyisocaproate CoA-transferase HadA	isocaprenoyl-CoA:2-hydroxyisocaproate			0.91	0.08	23
			K.LLSEADIFVTNVR.V	1503.8297	0.87		2
			K.SKEGVEILHK.L	1222.7285	1.04		3
			K.VGQHTVEVLK.S	1164.6867	0.81		2
			K.VVELSSFIAAPCCAK.M	1706.8736	0.91		2
			R.ENPNSPLMTTYK.C	1449.7174	0.94		2
			R.GGVSQSVMEK.G	1076.5536	0.91		2
			K.LLSEADIFVTNVR.V	1503.8297	0.00		3
			K.SPASDDENPM(15.995)FELENGNKK.G	1089.4285	0.00		3
			K.SPASDDENPMFELENGNK.K	2049.9031	0.00		2
			K.SPASDDENPMFELENGNKK.G	2206.0293	0.00		3
			K.TYDSGNTGVLVNTPVM(15.995)FR.N	1694.8185	0.00		2
			K.TYDSGNTGVLVNTPVMFR.N	1998.9914	0.00		2
			R.ENPNSPLM(15.995)TTYK.C	928.4324	0.00		2
WP_003430598.1	ribosome recycling factor	ribosome			0.91	0.1	23
			K.AAEEFKVR.I	1004.5655	0.89		2
			K.AIANSDLGLNPSNDGEVIR.L	1983.0102	1		2
			K.AIANSDLGLNPSNDGEVIR.L	1983.0102	1.01		3
			K.GGELTEDELK.K	1145.5816	0.76		2
			K.GGELTEDELKK.A	1301.7079	0.91		2
			K.GGELTEDELKK.A	1301.7079	0.88		3
			K.SAMHEIEK.A	999.5059	0.89		2
			R.ANAQMLDKIR.V	1214.6805	1.11		2
			R.ANAQMLDKIR.V	1214.6805	1.06		3
			R.ILMISPWDK.S	1157.6519	0.87		2
			R.LSVPALTEER.R	1141.6343	1.08		2
			R.VDYYGTPTPINQIGAISVPEPR.I	2415.2515	0.97		2
			R.VDYYGTPTPINQIGAISVPEPR.I	2415.2515	0.91		3
			K.EIDTLLSKK.E	1129.6958	0.00		2
			K.MTDKFIK.E	965.562	0.00		2
			R.ANAQMLDK.I	945.4954	0.00		2
			R.ILMISPWDKSAM(15.995)HEIEK.A	1446.7615	0.00		4
			R.LSVPALTEERR.K	1297.7354	0.00		3
WP_003434148.1	triose-phosphate isomerase	triose-phosphate			0.91	0.09	234
			K.GAFTGEVSPLMLK.E	1404.7687	0.84		2
			K.GLYGELANEVR.I	1247.651	1.01		2
			K.TATAEDANDVISYIR.E	1665.821	1.09		2
			K.VVVAYEPIWAIGTGK.T	1657.9443	0.91		2
			K.VVVAYEPIWAIGTGK.T	1657.9443	0.87		3
			R.RQYFNETDETVNKK.V	1855.9509	0.89		3
			R.RQYFNETDETVNKK.V	1855.9509	0.96		4
			K.ALENVLKDDLAK.V	1411.8286	0.00		3
			K.IGAQNMHFEEK.G	1358.6653	0.00		3
			K.TATAEDANDVISYIR.E	1665.821	0.00		3
			R.QYFNETDETVNKK.V	1698.8465	0.00		2
			R.QYFNETDETVNKK.V	1698.8465	0.00		3
WP_003436172.1	SDR family oxidoreductase	SDR			0.91	0.08	23
			K.AAINSLTQNIATQYAK.D	1761.9625	0.83		2
			K.AAINSLTQNIATQYAK.D	1761.9625	0.94		3
			K.AAINSLTQNIATQYAKDNVR.C	2247.2053	0.91		3
			K.FVYFNAR.E	943.4916	0.84		2
			K.GIGLASAEILAK.N	1197.7333	1		2
			K.IAVVTAATK.G	928.5957	0.85		2
			K.SVYLPCK.A	921.4994	1.03		2
			R.CNAVLPGLIATK.A	1311.7584	1.02		2
			R.IGEPDDIAK.A	1012.5441	0.83		2
			K.AAIPHMIK.N	935.5626	0.00		2
			K.GSIVNISSIGSVLPDLSR.I	1841.0258	0.00		2
			K.NGATVYLAAR.S	1062.5822	0.00		2
			R.SEELANEVINK.I	1300.6875	0.00		2
WP_003437218.1	alpha/beta hydrolase	alpha/beta			0.91	0.00	2
			K.AYFISPIVNMEK.L	1466.7843	0.91		2
			K.QTNATLTVMR.N	1161.6176	0.00		2
WP_003437840.1	uracil phosphoribosyltransferase	uracil			0.91	0.05	234
			K.DIPLKDVEIETPIQK.T	1822.0533	0.85		3
			K.KLAIIPILR.A	1091.7794	0.87		2
			K.LAIIPILR.A	935.6532	0.97		2
			K.LANLVAAPEGIAEVQK.Y	1677.9665	0.95		2
			K.VVETNHPLIQHK.L	1469.8355	0.89		3
			M.SKVVETNHPLIQHK.L	1712.9937	0.97		4
			R.AGLGMVDGLVSLMPAAK.V	1684.9256	0.91		2
			K.VVETNHPLIQHK.L	1469.8355	0.00		2
			R.AGLGM(15.995)VDGLVSLM(15.995)PAAK.V	475.2465	0.00		2
			R.AGLGM(15.995)VDGLVSLMPAAK.V	475.2465	0.00		2
			R.AGLGM(15.995)VDGLVSLMPAAK.V	475.2465	0.00		3
			R.AGLGMVDGLVSLM(15.995)PAAK.V	1289.6723	0.00		2
			R.AGLGMVDGLVSLMPAAK.V	1684.9256	0.00		3
WP_003438469.1	GntR family transcriptional regulator	GntR			0.91	0.03	2
			K.IALDIANK.I	912.5644	0.95		2
			K.ILEDIGVVK.S	1040.6481	0.89		2
			K.IYTGEIQEDSVLFGR.S	1753.8887	0.91		2
			-.MDKNYTMPIYQK.I	1614.815	0.00		3
WP_003439345.1	deoxyribose-phosphate aldolase	deoxyribose-phosphate			0.91	0.18	23
			K.ATTTWEDIK.I	1119.5812	0.79		2
			K.ICTVIGFPLGYQTTATK.V	1926.0366	0.91		3
			K.ILKNEDTTDY.-	1266.6344	0.75		2
			K.SISDAEKFIEAGAER.L	1677.8574	1.22		3
			K.TSTGMGTGGATLEDIK.L	1593.792	0.93		2
			K.ICTVIGFPLGYQTTATK.V	1926.0366	0.00		2
			K.MCEIVTM(15.995)SGSDFIK.T	910.3962	0.00		2
			K.TSTGM(15.995)GTGGATLEDIKLMK.E	523.2312	0.00		3
			K.TSTGMGTGGATLEDIKLMK.E	1995.0462	0.00		3
			K.TVDHTILK.A	981.5859	0.00		2
			K.VIIETCYLDEDEKIK.M	1952.0257	0.00		3
WP_003439413.1	shikimate kinase	shikimate			0.91	0.04	23
			K.ETGIIIFIDRPIQK.I	1698.008	0.94		3
			K.FSDIEILNDK.S	1248.6602	0.91		2
			K.ILEDININSRPLLK.N	1693.0138	0.9		3
			K.LILIGMPGSGK.T	1140.6941	0.89		2
			R.LYNLYNER.I	1111.5662	1		2
			K.DVNMEILK.E	1016.5576	0.00		2
			K.EKLILIGMPGSGK.T	1425.8629	0.00		3
			K.KFSDIEILNDK.S	1404.7864	0.00		3
			K.LILIGM(15.995)PGSGK.T	686.4401	0.00		2
			K.TVISTGGGVIKK.D	1242.7911	0.00		2
			K.TVISTGGGVIKK.D	1242.7911	0.00		3
			R.NYETQACR.E	1068.4658	0.00		2
WP_004454662.1	ABC transporter substrate-binding protein	ABC			0.91	0.00	2
			K.AIEYIYTNPAEAAK.I	1608.8399	0.91		2
			K.IQAFTSCDPWGSVAENDGAGK.I	2266.0406	0.00		2
WP_004454870.1	hypothetical protein	hypothetical			0.91	0.03	23
			K.QDATNIVEQAK.K	1271.6721	0.91		2
			R.AKDIVDRAER.I	1227.6935	0.95		3
			R.IQQEYQDNIEELKK.N	1861.9867	0.9		3
			K.AYVESSEPVVQADQR.A	1704.8319	0.00		2
			K.QDATNIVEQAKK.E	1427.7984	0.00		2
			K.QDATNIVEQAKK.E	1427.7984	0.00		3
			R.IQQEYQDNIEELKK.N	1861.9867	0.00		2
WP_009890867.1	cell division protein FtsZ	cell			0.91	0.01	23
			K.VIGVGGGGNNAVNR.M	1310.7055	0.92		2
			R.GLGAGANPEVGKR.A	1280.7201	0.9		3
			K.NAEGGIAELK.S	1056.5815	0.00		2
			R.QAIQSPLLETSIQGAK.G	1738.9829	0.00		2
WP_009895182.1	proline--tRNA ligase	proline--tRNA			0.91	0.00	2
			R.VAPIQVVIVPIAAK.K	1472.9694	0.91		2
			R.VAPIQVVIVPIAAK.K	1472.9694	0.00		3
WP_009897952.1	cell wall-binding repeat-containing protein	cell			0.91	0.00	2
			K.NSGNINTISGSEEPSISGK.K	1945.9593	0.91		2
			R.AKDGSYIEAVEIDTSNNEVSR.W	2353.1479	0.00		3
WP_009902455.1	LamB/YcsF family protein	LamB/YcsF			0.91	0.00	2
			R.FANEVFADR.A	1095.5349	0.91		2
			R.SVEGAVIHDTK.H	1210.6558	0.00		2
WP_003418356.1	dihydropteroate synthase	dihydropteroate			0.92	0.04	23
			K.ALAERDPAPILK.R	1348.8078	0.88		3
			K.ALAERDPAPILKR.A	1504.9089	0.92		3
			K.LLQSEFNNVPIALDTANK.K	2043.1082	0.95		3
			K.LLQSEFNNVPIALDTANKK.A	2199.2344	0.91		3
			K.QVEVLEAIK.M	1083.654	0.87		2
			R.DGEEIMTWGIK.L	1333.6588	0.95		2
			R.IHCISPSIRK.A	1265.7278	0.85		3
			R.MAYCQEILEK.G	1339.6516	0.92		2
			R.TNAKPIINSADAGSR.F	1569.8475	0.98		3
			K.LLQSEFNNVPIALDTANK.K	2043.1082	0.00		2
			K.M(15.995)M(15.995)TEMGLLTTGGLSNVSNGCPK.H	177.0824	0.00		3
			K.M(15.995)MTEM(15.995)GLLTTGGLSNVSNGCPK.H	177.0824	0.00		3
			K.MM(15.995)TEM(15.995)GLLTTGGLSNVSNGCPK.H	308.1228	0.00		2
			K.MMTEMGLLTTGGLSNVSNGCPK.H	2354.1184	0.00		2
			R.DGEEIM(15.995)TWGIK.L	720.3	0.00		2
			R.DNDERM(15.995)AYCQEILEK.G	806.3229	0.00		3
			R.DNDERMAYCQEILEK.G	1969.8955	0.00		3
			R.M(15.995)AYCQEILEK.G	177.0824	0.00		2
WP_003422061.1	aspartate-semialdehyde dehydrogenase	aspartate-semialdehyde			0.92	0.00	2
			R.VVYSTYQAVSGSGVK.G	1599.8508	0.92		2
WP_003428740.1	acetyl-CoA carboxylase biotin carboxyl carrier protein	acetyl-CoA			0.92	0.00	2
			K.AIDSTNLEYVK.L	1307.6973	0.92		2
WP_003429416.1	GTP cyclohydrolase I FolE	GTP			0.92	0.04	234
			R.AEAMSLITMK.-	1149.6138	0.97		2
			R.EILEAIGEDPDREGLIETPNR.V	2394.2108	0.92		3
			R.MYEEIFSGLSEEPRDHLK.V	2236.0915	0.9		4
			R.AEAM(15.995)SLITMK.-	448.1992	0.00		2
			R.AEAMSLITM(15.995)K.-	993.4875	0.00		2
			R.M(15.995)YEEIFSGLSEEPR.D	177.0824	0.00		2
			R.MYEEIFSGLSEEPR.D	1713.792	0.00		2
WP_003432265.1	cyclodeaminase/cyclohydrolase family protein	cyclodeaminase/cyclohydrolase			0.92	0.08	234
			K.AYGLPKETEEEKR.I	1632.8723	0.83		4
			K.MIDDDAECFLPLSK.A	1708.8052	0.94		2
			K.VACEVPLNIVR.V	1296.7224	0.99		2
			K.YAEYEESVKEILSK.A	1770.9291	0.78		3
			R.LAISDVGVGVQCLR.A	1513.8287	0.95		2
			R.LAISDVGVGVQCLR.A	1513.8287	0.9		3
			K.LHEDLVDKGSR.L	1323.7147	0.00		3
			K.M(15.995)IDDDAECFLPLSK.A	177.0824	0.00		2
			K.MIDDDAECFLPLSK.A	1708.8052	0.00		3
			K.TEVDKLVEDGVK.I	1414.7919	0.00		3
WP_003434301.1	nitroreductase family protein	nitroreductase			0.92	0.07	2
			K.GIQNEINDNGLLPGSR.Q	1723.8853	0.97		2
			K.IIEAGINAPSSK.N	1254.7184	0.83		2
			R.LQLSDVTEWR.-	1273.6667	0.92		2
			K.NQSISHETIEK.I	1340.6936	0.00		2
			K.YKNQSISHETIEK.I	1659.8832	0.00		3
			K.YKNQSISHETIEK.I	1659.8832	0.00		4
WP_003434417.1	ribosome-associated translation inhibitor RaiA	ribosome-associated			0.92	0.06	234
			-.MNIIISGK.Q	930.5572	0.93		2
			K.LSKLDNYIHPDTDVK.V	1841.9968	0.81		3
			K.LSKLDNYIHPDTDVK.V	1841.9968	0.9		4
			K.NIDSDEIAVVYK.R	1420.745	0.99		2
			K.NIDSDEIAVVYKR.N	1576.8461	0.94		2
			K.NIDSDEIAVVYKR.N	1576.8461	0.91		3
			K.QIELTDAIK.N	1085.6332	0.92		2
			R.NNGGYGIIEHE.-	1229.5677	1.03		2
			K.LDNYIHPDTDVK.V	1484.7511	0.00		3
			K.LSKLDNYIHPDTDVK.V	1841.9968	0.00		2
			K.QIELTDAIKNK.I	1355.8024	0.00		2
			K.QIELTDAIKNKIETK.L	1856.1064	0.00		4
WP_003435673.1	50S ribosomal protein L5	50S			0.92	0.08	234
			K.EQLIFPEIEYDKIDK.V	1964.0588	1		3
			K.EQLIFPEIEYDKIDKVR.G	2219.2283	0.83		3
			K.EQLIFPEIEYDKIDKVR.G	2219.2283	0.92		4
			K.EVAPALMEK.F	1042.5733	0.91		2
			K.FGYKNVMEIPK.L	1408.7788	0.75		3
			K.GVEELEMISGQKPVITK.A	1942.089	0.87		2
			K.GVEELEMISGQKPVITK.A	1942.089	0.86		3
			K.IVINMGIGDAR.E	1185.654	0.96		2
			K.IVINMGIGDARENPK.G	1681.9185	0.88		3
			K.LLGMPFSK.-	947.5514	0.91		2
			K.LREGMPIGTK.V	1156.6638	0.91		2
			K.LVSVSLPR.V	897.5648	1		2
			K.NVMEIPK.L	885.4994	0.91		2
			K.NVMEIPKLNK.I	1268.7526	0.86		3
			K.TDEEARELLK.L	1258.6769	0.98		2
			K.TDEEARELLK.L	1258.6769	1		3
			K.YMKEVAPALMEK.F	1492.8033	0.7		2
			K.YMKEVAPALMEK.F	1492.8033	0.82		3
			R.DFRGVNPNAFDGR.G	1491.7219	1.02		3
			R.GMDIIFVTTAK.T	1250.6944	0.92		2
			R.GNYALGVK.E	876.5069	1		2
			R.GVNPNAFDGR.G	1073.5254	0.97		2
			R.GVNPNAFDGRGNYALGVK.E	1904.9938	0.93		2
			R.GVNPNAFDGRGNYALGVK.E	1904.9938	0.95		3
			K.EQLIFPEIEYDKIDK.V	1964.0588	0.00		2
			K.EVAPALM(15.995)EK.F	757.4044	0.00		2
			K.GVEELEM(15.995)ISGQKPVITK.A	833.3841	0.00		2
			K.GVEELEM(15.995)ISGQKPVITK.A	833.3841	0.00		3
			K.GVEELEMISGQKPVITK.A	1942.089	0.00		4
			K.IVINM(15.995)GIGDAR.E	616.3618	0.00		2
			K.IVINM(15.995)GIGDARENPK.G	616.3618	0.00		3
			K.IVINMGIGDARENPK.G	1681.9185	0.00		2
			K.MFYFMDK.L	1036.4762	0.00		2
			K.NVMEIPKLNK.I	1268.7526	0.00		2
			K.YM(15.995)KEVAPALM(15.995)EK.F	340.1457	0.00		3
			K.YM(15.995)KEVAPALMEK.F	340.1457	0.00		3
			K.YMKEVAPALM(15.995)EK.F	1207.6345	0.00		3
			R.DFRGVNPNAFDGR.G	1491.7219	0.00		2
			R.GM(15.995)DIIFVTTAK.T	234.1038	0.00		2
			R.GM(15.995)DIIFVTTAKTDEEAR.E	234.1038	0.00		3
			R.KSVANFK.L	876.5433	0.00		2
WP_003437079.1	DUF1015 domain-containing protein	DUF1015			0.92	0.04	2
			K.VAALPYDVMNSK.E	1362.7217	0.9		2
			R.IDFIGGIR.G	917.5335	0.95		2
			K.VAALPYDVM(15.995)NSK.E	1005.5205	0.00		2
WP_009887887.1	50S ribosomal protein L4	50S			0.92	0.07	234
			K.ALVVIADKNDNVIK.S	1594.9658	0.93		2
			K.ALVVIADKNDNVIK.S	1594.9658	0.92		3
			K.KALVVIADKNDNVIK.S	1751.0921	0.78		3
			K.KALVVIADKNDNVIK.S	1751.0921	0.96		4
			K.TKEFAQILNNINAAK.K	1758.004	0.91		2
			K.TKEFAQILNNINAAK.K	1758.004	0.96		3
			K.TKEFAQILNNINAAKK.A	1915.1336	0.88		3
			K.TKEFAQILNNINAAKK.A	1915.1336	0.99		4
			K.VQNSEVIVLDALNMDAPK.T	2012.0693	0.88		2
			K.VQNSEVIVLDALNMDAPK.T	2012.0693	0.9		3
			K.YDSFIITTDAVK.K	1427.7548	0.93		2
			R.SVQWVGGGVAFAPKPR.S	1711.9603	0.96		2
			R.SVQWVGGGVAFAPKPR.S	1711.9603	1.05		3
			R.SYKYTLPK.K	1082.6376	0.83		2
			K.EFAQILNNINAAK.K	1500.83	0.00		2
			K.VQNSEVIVLDALNM(15.995)DAPK.T	1571.8229	0.00		2
			K.VQNSEVIVLDALNM(15.995)DAPK.T	1571.8229	0.00		3
			N.SEVIVLDALNMDAPK.T	1669.8961	0.00		2
			R.SVQWVGGGVAFAPK.P	1457.8031	0.00		3
WP_009895388.1	energy-coupling factor ABC transporter permease	energy-coupling			0.92	0.00	2
			K.SILENNDKGVK.A	1299.7398	0.92		2
			K.SILENNDKGVK.A	1299.7398	0.00		3
WP_009901734.1	bifunctional phosphoribosylaminoimidazolecarboxamide formyltran	bifunctional			0.92	0.1	23
			K.ELNKLDYEIISTGNTFK.T	2069.1126	0.84		3
			K.IENSLQPYEMK.Y	1406.7116	0.87		2
			K.NGQTLALGCGQTSR.I	1489.7307	1.05		2
			K.SNAIAIVK.N	870.5539	0.98		2
			K.LKTDTMTLEDR.K	1377.7174	0.00		3
			R.YGENPHQNGFLYSQSNAK.N	2109.9949	0.00		3
WP_009902040.1	4Fe-4S binding protein	4Fe-4S			0.92	0.00	2
			R.GQLFNLLGNK.L	1158.6761	0.92		2
			R.GQLFNLLGNKLK.L	1427.8864	0.00		3
WP_009902250.1	phosphodiesterase	phosphodiesterase			0.92	0.00	2
			R.NDIPEGYNPK.K	1201.5979	0.92		2
			R.IILNHGYIESEEEIIDKAK.K	2298.2552	0.00		4
WP_003416528.1	uracil-DNA glycosylase	uracil-DNA			0.93	0	23
			K.LGKEPINWQIENI.-	1608.8875	0.93		2
			K.NKGWEIFTDR.V	1320.6826	0.93		3
			K.FLIEEYK.T	996.5532	0.00		2
			K.FLIEEYKTR.Q	1253.702	0.00		2
			R.KKVELIDTSK.H	1271.8064	0.00		3
WP_003421168.1	50S ribosomal protein L2	50S			0.93	0.00	2
			K.VATIEYDPNR.T	1204.6088	0.93		2
			K.ATIGQVGNIEHGNVVIGK.A	1862.0455	0.00		3
			R.SAGVSAQLMAK.E	1117.6165	0.00		2
WP_003423115.1	fructose-6-phosphate aldolase	fructose-6-phosphate			0.93	0.06	23
			K.EGRDFIEVVK.E	1246.6921	0.93		3
			K.GMIEEAEK.L	961.479	0.89		2
			K.GMIEEAEKLSK.I	1317.7214	0.9		2
			K.GMIEEAEKLSK.I	1317.7214	0.96		3
			K.IPMTAEGLK.A	1014.5784	0.88		2
			K.TNVTLIFSAGQALLAAR.A	1773.0149	1.07		2
			R.AGATYVSPFVGR.L	1251.6612	0.98		2
			R.MGADIATVPLK.V	1170.6682	0.93		2
			R.M(15.995)GADIATVPLK.V	177.0824	0.00		2
			R.NPIHVLQAAR.M	1145.6669	0.00		2
WP_003427762.1	acyl-CoA dehydrogenase family protein	acyl-CoA			0.93	0.03	23
			K.FQNTQFTIADMETK.V	1728.8393	0.93		2
			K.IAMGTLEVGR.I	1073.5903	1		2
			K.MVISSNVLK.-	1045.6206	0.92		2
			K.YYASEIANEVAYK.A	1575.7821	0.93		2
			R.GLVYDAAQKR.D	1175.6663	0.95		2
			R.IVSIYEGTSEVQK.M	1507.8134	0.97		2
			R.IVSIYEGTSEVQK.M	1507.8134	0.9		3
			K.FQNTQFTIADM(15.995)ETK.V	1342.6227	0.00		2
			K.FQNTQFTIADMETK.V	1728.8393	0.00		3
			K.IAM(15.995)GTLEVGR.I	361.2035	0.00		2
WP_003431873.1	proline reductase-associated electron transfer protein Prd	proline			0.93	0.04	2
			K.ATTLDAPITK.T	1085.6332	0.93		2
			K.MGVTDIVSVQK.C	1231.6846	0.9		2
			K.TSGGIIVTMPFVNEK.R	1647.8906	0.98		2
			K.AGAEVILIGNCTDCSNTVM(15.995)GSAPK.L	2052.936	0.00		3
			K.AGAEVILIGNCTDCSNTVMGSAPK.L	2521.2056	0.00		3
			K.EAGVVGMGGAGFPTHVK.L	1668.8658	0.00		3
			K.M(15.995)GLLVCACGPNEER.M	177.0824	0.00		2
			K.MGLLVCACGPNEER.M	1632.7422	0.00		2
			K.NITVVGQLNSGK.E	1284.7402	0.00		2
			K.TSGGIIVTM(15.995)PFVNEK.R	905.4892	0.00		2
			K.YAMEVTNAGK.G	1138.5692	0.00		2
			R.AGGIKGEYGEIILGGPFTGK.A	2048.1387	0.00		3
			R.KMGLLVCACGPNEER.M	1788.8685	0.00		3
WP_003435668.1	50S ribosomal protein L6	50S			0.93	0.09	234
			K.EENTIMVERPTDNKK.H	1886.9772	0.82		3
			K.EENTIMVERPTDNKK.H	1886.9772	0.97		4
			K.GIDKQLVGNYAAK.I	1459.8399	1.02		2
			K.GIDKQLVGNYAAK.I	1459.8399	1.1		3
			K.QLVGNYAAK.I	1018.5811	0.88		2
			K.YVDEVIR.R	920.4967	0.93		2
			R.TLLDNMVVGVNTGFEK.K	1791.9441	0.93		2
			K.GIKYVDEVIR.R	1246.7285	0.00		3
			R.TLLDNM(15.995)VVGVNTGFEK.K	733.368	0.00		2
			R.TLLDNM(15.995)VVGVNTGFEK.K	733.368	0.00		3
WP_003436064.1	phosphoribosylglycinamide formyltransferase	phosphoribosylglycinamide			0.93	0.13	23
			K.QGAYGLER.A	920.4716	1.13		2
			K.RVLEVEHR.I	1064.6091	0.93		2
			K.VHQGVIDYGAK.V	1241.6768	0.9		3
			K.ESISLFCENK.L	1281.6275	0.00		2
			K.ESISLFCENKLK.L	1550.8378	0.00		3
			K.VTGATVHFVDEGADTGPIIM(15.995)QDVVK.V	2058.0173	0.00		3
WP_003437730.1	precorrin-6A reductase	precorrin-6A			0.93	0.1	23
			K.IIDATHPYAVEVSK.T	1597.8716	0.86		3
			R.VLPTSEVILSCEK.L	1529.8375	1		2
			K.ESGIAGGFLEK.V	1162.6234	0.00		2
WP_004454512.1	TerD family protein	TerD			0.93	0.12	23
			K.GFFGSLR.S	810.4388	1.03		2
			K.QKQDSDLVVK.L	1242.7184	0.8		2
			R.EMDTEFHWGLK.W	1447.6806	0.93		3
WP_009889571.1	nucleoside hydrolase	nucleoside			0.93	0.00	2
			K.VSIIALAPLTNIAK.A	1478.9436	0.93		2
WP_009902140.1	nitroreductase	nitroreductase			0.93	0.06	23
			-.MNNNFQDNQTINLIQSR.R	2078.0044	0.96		2
			-.MNNNFQDNQTINLIQSR.R	2078.0044	1.03		3
			K.LLKEISDDTLSR.I	1444.8137	0.92		2
			K.LLKEISDDTLSR.I	1444.8137	0.94		3
			R.IHEVSNVEINK.N	1336.7351	0.84		2
			R.IHEVSNVEINK.N	1336.7351	0.9		3
			-.M(15.995)NNNFQDNQTINLIQSR.R	177.0824	0.00		2
			K.QPWHITVVQDQK.L	1533.8304	0.00		3
WP_003416006.1	hypoxanthine phosphoribosyltransferase	hypoxanthine			0.94	0.00	2
			K.GASVFVSDLIR.C	1190.6659	0.94		2
WP_003416871.1	glycine/sarcosine/betaine reductase component B subunit	glycine/sarcosine/betaine			0.94	0.09	234
			K.AAMYLGEVAR.N	1107.5747	1		2
			K.GVAVVTTGK.I	886.5488	0.89		2
			K.IVGFQEGIIDMTGEGAK.Y	1819.939	0.86		2
			K.IVGFQEGIIDMTGEGAK.Y	1819.939	0.88		3
			K.LNNVVVIAEPIDGLK.Q	1648.9764	0.99		2
			K.LNNVVVIAEPIDGLKQYAHEK.A	2434.3665	0.94		4
			K.SIDIELARPGESVR.I	1568.8522	1.11		3
			K.THALKGVAVVTTGK.I	1464.9028	1		3
			K.TVIVTDEYAGR.D	1250.6507	1.07		2
			K.TVIVTDEYAGRDGGSQSLADADVR.A	2523.2282	1.09		3
			R.ADAVVTGGNANQVVVLPK.L	1807.0204	0.92		2
			R.ITPVKDVIEPR.V	1321.7969	0.92		2
			R.ITPVKDVIEPR.V	1321.7969	0.93		3
			R.VKVEGNGGIFPGIMSK.V	1715.9644	0.82		3
			K.AAM(15.995)YLGEVAR.N	319.1566	0.00		2
			K.IVGFQEGIIDM(15.995)TGEGAK.Y	1248.6424	0.00		2
			K.IVGFQEGIIDM(15.995)TGEGAK.Y	1248.6424	0.00		3
			K.LNNVVVIAEPIDGLK.Q	1648.9764	0.00		3
			K.QEMLQEIGGDEHIK.S	1681.8345	0.00		3
			K.THALKGVAVVTTGK.I	1464.9028	0.00		2
			K.VEGNGGIFPGIMSK.V	1460.7697	0.00		2
			R.ADAVVTGGNANQVVVLPKLDK.V	2192.261	0.00		3
			R.DGGSQSLADADVR.A	1317.6161	0.00		2
			R.DGGSQSLADADVRADAVVTGGNANQVVVLPK.L	3079.5979	0.00		3
			R.VKVEGNGGIFPGIM(15.995)SK.V	1472.8061	0.00		2
			R.VKVEGNGGIFPGIMSK.V	1715.9644	0.00		2
WP_003418888.1	acyl-CoA dehydrogenase	acyl-CoA			0.94	0.05	2
			K.IAMSTLDGGR.I	1047.5383	0.91		2
			K.ITEIYEGTSEVQR.M	1551.7781	0.98		2
			K.AVQLHGGYGYTR.D	1348.6888	0.00		3
			K.FQNTQFQLADM(15.995)EVK.V	1369.6336	0.00		2
			K.FQNTQFQLADMEVK.V	1753.8709	0.00		2
			K.ITEIYEGTSEVQR.M	1551.7781	0.00		3
WP_003421962.1	type I glyceraldehyde-3-phosphate dehydrogenase	type			0.94	0.15	23
			K.AIGLVIPSLK.G	1065.7162	0.92		2
			K.NVTVEEINAAMK.E	1373.7225	1.27		2
			K.VVISAPATGDLK.T	1225.7282	0.88		2
			R.AAAGNIVPNTTGAAK.A	1410.7831	0.9		2
			R.TLGYFAQLAK.-	1166.6699	1.04		2
			R.VPVVTGSITELVCTLGK.N	1829.0413	0.97		3
			K.DKAEAHIQAGAK.K	1321.7354	0.00		3
			K.GLM(15.995)TTIHAYTNDQNTLDGPHPK.G	347.1879	0.00		3
			K.NVTVEEINAAM(15.995)K.E	1217.5962	0.00		2
			K.VLNDKYGIEK.G	1261.7282	0.00		2
WP_003422104.1	D-proline reductase (dithiol) proprotein PrdA	D-proline			0.94	0.12	23
			K.AGTNMERPGPLAAHR.A	1604.8205	1.02		3
			K.IVLEENEQSLPMSK.K	1671.8753	0.92		2
			K.IVLEENEQSLPMSKK.R	1828.0016	0.78		3
			K.LNNIEAIEK.V	1098.6285	0.95		2
			K.LNNIEAIEKVTGEK.I	1640.9349	0.89		3
			K.NAIEGVEVK.A	1013.5757	0.93		2
			K.QGIENEILSNNTLAPEDAVR.I	2211.1213	1		2
			K.QGIENEILSNNTLAPEDAVR.I	2211.1213	0.84		3
			K.SKQGIENEILSNNTLAPEDAVR.I	2454.2795	0.97		3
			K.VTGEKIVLEENEQSLPMSK.K	2215.1851	0.8		3
			M.SITLETAQAHANDPAVCCCR.F	2302.0334	1.11		3
			R.HYWREPLVIR.A	1395.7775	1.19		3
			K.IVLEENEQSLPM(15.995)SK.K	1428.717	0.00		2
			K.IVLEENEQSLPM(15.995)SK.K	1428.717	0.00		3
			K.IVLEENEQSLPM(15.995)SKK.R	1428.717	0.00		3
			K.IVLEENEQSLPMSK.K	1671.8753	0.00		3
			K.IVLEENEQSLPMSKK.R	1828.0016	0.00		2
			K.LKETLDALSPMTTDNVEGYK.A	2309.1906	0.00		3
			K.NAIEGVEVKAPER.K	1466.8093	0.00		3
			K.VTGEKIVLEENEQSLPM(15.995)SK.K	1972.0268	0.00		3
			K.YMTHMVDNNK.S	1307.6002	0.00		2
			K.YMTHMVDNNK.S	1307.6002	0.00		3
			K.YMTHMVDNNKSK.Q	1550.7585	0.00		3
WP_003422204.1	transcription elongation factor GreA	transcription			0.94	0	23
			K.EVVEVQVPDGVAK.F	1423.7922	0.94		2
			K.EVVEVQVPDGVAK.F	1423.7922	0.94		3
			R.AAKEVVEVQVPDGVAK.F	1721.9927	0.94		3
			R.KAVIIDESK.I	1085.6696	0.00		2
WP_003426928.1	DivIVA domain-containing protein	DivIVA			0.94	0.19	23
			-.MLTPIEIENK.E	1242.6894	0.55		2
			K.ATLITAQSAAEDTCSAANK.K	1978.9711	1.13		2
			K.ATLITAQSAAEDTCSAANK.K	1978.9711	0.93		3
			K.ATLITAQSAAEDTCSAANKK.A	2135.0973	0.94		3
			K.IIVEEADLK.A	1084.638	0.93		2
			K.SLLEDEIR.S	1001.5393	1.1		2
			R.QIIEQANNR.V	1112.5938	1.01		2
			K.IIVEEADLKAR.Q	1311.7762	0.00		3
			R.SVDEIFYDVDEK.C	1513.7188	0.00		2
WP_003428430.1	GNAT family N-acetyltransferase	GNAT			0.94	0.00	2
			K.NGVDVLIR.E	912.5393	0.94		2
WP_003428771.1	cyclase family protein	cyclase			0.94	8.4	23
			K.AYVLELEK.G	1019.5903	1.09		2
			K.EAANYIANTNIK.G	1376.73	0.92		2
			K.FLFIAAPFK.Y	1108.6685	0.94		2
			K.GNENIELEYLK.K	1376.7188	20		2
			K.IIIENLTNLENVPEK.F	1794.0139	0.92		2
			K.IIIENLTNLENVPEK.F	1794.0139	0.89		3
			K.KQYYVGYPTLTK.E	1543.865	20		3
			K.QYYVGYPTLTK.E	1387.7388	0.92		2
			K.YNDADGAPVR.A	1104.52	0.96		2
			K.GETLDKLDIENFVGK.A	1760.956	0.00		2
WP_003429754.1	ABC transporter ATP-binding protein	ABC			0.94	0.09	23
			K.QKPLQLSGGQQQR.V	1522.858	1		3
			K.TIIMVTHDQDLTK.Y	1569.8436	0.94		3
			R.LKDGVFTSEV.-	1149.6281	0.83		2
			K.TIIMVTHDQDLTK.Y	1569.8436	0.00		2
			R.YIFDGTDVTNLSENER.S	1900.8884	0.00		2
WP_003431138.1	ribulose-phosphate 3-epimerase	ribulose-phosphate			0.94	0.04	2
			K.AGVVLNPATPVDTIK.H	1549.9079	0.92		2
			K.LAPSILSADFAK.L	1287.7438	0.91		2
			K.NASLEELV.-	901.4757	0.99		2
			R.KNASLEELV.-	1057.6019	0.96		2
WP_003434069.1	cell division protein	cell			0.94	0.09	23
			K.AVSYMSNER.R	1083.5019	0.87		2
			K.AVSYMSNERR.V	1239.603	1		3
			R.EFKINNDSIFK.F	1437.7868	0.00		3
WP_003435129.1	lactate utilization protein	lactate			0.94	0.02	23
			K.GYLVSNKEELLK.K	1475.8599	0.95		2
			K.GYLVSNKEELLK.K	1475.8599	0.94		3
			K.TIAAPANCK.R	1000.5376	0.96		2
			K.VIVIAGVNK.I	967.643	0.92		2
			R.ICCSYTLIK.R	1212.6247	0.93		2
			R.IHVIFLNEDFGY.-	1493.7555	0.94		2
			R.VAAMIYGPDK.V	1119.5998	0.9		2
			-.M(15.995)DQNLNWLNEK.R	177.0824	0.00		2
			K.DVDEAIKR.T	1000.5553	0.00		2
			K.IVKDVDEAIKR.T	1368.8341	0.00		2
			K.IVKDVDEAIKR.T	1368.8341	0.00		3
			K.TTGICIDCSSPGR.I	1450.6545	0.00		2
WP_003437525.1	NUDIX hydrolase	NUDIX			0.94	0.00	2
			K.ILGGGLPYESAVQR.V	1486.8144	0.94		2
			K.KLVSEGDDVPAN.-	1298.6718	0.00		2
			R.CAGGVVFYANK.V	1240.6274	0.00		2
WP_009887855.1	23S rRNA (guanosine(2251)-2-O)-methyltransferase RlmB	23S			0.94	0.02	23
			K.VTNIVNTIK.R	1056.6543	0.95		2
			K.VTNIVNTIKR.L	1212.7554	0.91		3
			R.TADAVGAHGVIIPK.R	1403.8137	0.94		3
			K.ASAGAVEYM(15.995)PVCK.V	925.4215	0.00		2
			K.ASAGAVEYMPVCK.V	1437.6996	0.00		2
			R.TADAVGAHGVIIPK.R	1403.8137	0.00		2
WP_009889364.1	tyrosine--tRNA ligase	tyrosine--tRNA			0.94	0.04	2
			K.ALTTEQVLANAK.T	1313.7555	0.97		2
			K.SMEIPDELIIK.Y	1342.7418	0.92		2
			K.GVDDLIDEKELR.E	1456.7773	0.00		2
			K.GVDDLIDEKELR.E	1456.7773	0.00		3
			K.LGLDPSAPDIHLGHTVVLR.K	2038.1405	0.00		4
			K.SM(15.995)EIPDELIIK.Y	264.1144	0.00		2
			K.TYEEQIFK.V	1112.5754	0.00		2
			R.EIVTLYHGEESAK.E	1530.793	0.00		3
			R.EIVTLYHGEESAKEAEER.F	2146.0623	0.00		3
			R.KALTTEQVLANAK.T	1469.8817	0.00		3
WP_009891793.1	4Fe-4S dicluster domain-containing protein	4Fe-4S			0.94	0.08	2
			K.GDNFCMPIQCR.H	1424.5999	1.05		2
			K.IACISACPQEALK.L	1515.7789	0.89		2
			K.IGSFVIADPNK.C	1215.6863	0.94		2
			R.HCEDAPCLNSCPQK.A	1770.7488	0.00		2
			R.HCEDAPCLNSCPQK.A	1770.7488	0.00		3
WP_009898069.1	bifunctional acetaldehyde-CoA/alcohol dehydrogenase	bifunctional			0.94	0.1	23
			K.AVTDLLDEMNIK.H	1416.7534	0.86		2
			K.IFATYSQEQVDK.I	1483.7559	0.94		2
			K.IVGQTACTIAK.L	1216.6849	0.95		2
			K.SIFEYLPR.A	1051.5702	1.06		2
			K.TAVNSILVSK.T	1086.6649	0.99		2
			K.TCGVIEKDEAFGMTK.I	1768.874	0.89		3
			R.ILINTPSSQGGIGDLYNFK.L	2093.1238	0.77		2
			R.NGIIFSPHPR.A	1164.6404	1		2
			R.YAEIASFLGLK.G	1266.7224	0.8		2
			K.ASDFDDAVR.K	1022.4669	0.00		2
			K.AVTDLLDEM(15.995)NIK.H	1033.5002	0.00		2
			K.ETGMGIAEDKVIK.N	1473.8113	0.00		3
			K.EVDLTLATGGPGMVK.S	1542.8327	0.00		2
			K.HTTFFEVEPDPTLECAK.I	2076.9908	0.00		3
			K.LAGFEVPVDTK.V	1230.686	0.00		2
			K.LVEDGGFGHTSSLYIDDVNQR.E	2350.1271	0.00		3
			K.SAYSSGKPAIGVGAGNTPAIIDDSADIK.T	2759.4423	0.00		3
			K.TCGVIEKDEAFGMTK.I	1768.874	0.00		2
			R.ILINTPSSQGGIGDLYNFK.L	2093.1238	0.00		3
WP_009902281.1	septum formation inhibitor Maf	septum			0.94	0.04	23
			-.MNIILASASPR.R	1199.6696	0.96		2
			R.RKEILENTNVR.F	1426.8256	0.91		3
WP_009902544.1	3-methyl-2-oxobutanoate hydroxymethyltransferase	3-methyl-2-oxobutanoate			0.94	0.1	234
			K.AGAFSIVLEGVPTK.I	1443.8337	0.85		2
			K.AGAFSIVLEGVPTK.I	1443.8337	0.97		3
			K.EGGAHAVKLEGGSNVIK.Q	1748.9785	0.81		3
			K.EGGAHAVKLEGGSNVIK.Q	1748.9785	0.96		4
			K.HSFSINESELEKLY.-	1750.8778	0.98		3
			K.NYILEVNTGTFPQEK.H	1808.939	1.13		2
			K.QYANIGDIMKDSIK.N	1678.8964	0.87		3
			R.QLIEDAKLIEK.A	1382.8385	0.92		3
			K.EGGAHAVKLEGGSNVIK.Q	1748.9785	0.00		2
			K.HSFSINESELEKLY.-	1750.8778	0.00		2
			K.KLSMLTAYDYSIAK.I	1686.9266	0.00		3
			K.LSM(15.995)LTAYDYSIAK.I	377.1984	0.00		2
			K.QYANIGDIMK.D	1207.6271	0.00		2
WP_009902687.1	lipoprotein	lipoprotein			0.94	0.15	2
			K.YKGIVIPTF.-	1092.6583	1.05		2
			R.YLESIGLLTLPK.G	1401.8483	0.84		2
			K.GDGLVSPKDIIENPK.G	1664.9349	0.00		3
WP_009903399.1	C-GCAxxG-C-C family protein	C-GCAxxG-C-C			0.94	0.21	2
			K.LASGFPIGLGK.A	1114.675	0.8		2
			R.NISEEYFR.K	1084.5189	1.09		2
WP_009903738.1	pyruvate kinase	pyruvate			0.94	0.08	2
			K.INLPAITPK.D	1021.6536	0.88		2
			K.SPIIATTNNEK.T	1242.682	1		2
			K.SSVAGNTDEVIEK.A	1403.7144	0.00		2
contaminant_KERATIN12	no description	no			0.94	0.00	2
			R.LAADDFR.T	834.4236	0.94		2
			K.ATMQNLNDR.L	1089.5237	0.00		2
WP_003419758.1	DUF3867 domain-containing protein	DUF3867			0.95	0.04	2
			K.MSMAEFSR.K	985.4361	0.98		2
			K.VVMCETTNKYDY.-	1577.7106	0.92		2
			K.VVM(15.995)CETTNKYDY.-	375.2192	0.00		2
			R.NFGIDPSTAGFM(15.995)SNNTSSK.V	1283.5856	0.00		2
			R.NFGIDPSTAGFMSNNTSSK.V	2030.9449	0.00		2
			R.NFGIDPSTAGFMSNNTSSK.V	2030.9449	0.00		3
			R.YGMDTEEVEK.Q	1255.5642	0.00		2
WP_003421173.1	50S ribosomal protein L3	50S			0.95	0.09	234
			K.ADVFEAGAK.I	962.5073	0.71		2
			K.EFRVDSVEGYTVGQEIK.A	2012.0296	0.79		3
			K.GFQGPIKR.H	957.576	0.95		2
			K.GVVIPVTAVEAGPMVVTQIK.T	2064.2098	0.94		2
			K.GVVIPVTAVEAGPMVVTQIK.T	2064.2098	0.95		3
			K.IDVTGISK.G	887.5328	0.91		2
			K.KGHLAAANVLK.K	1204.7656	0.98		3
			K.KVGMTQIFTDK.G	1350.7581	0.95		3
			K.TVDKDGYNAIQIGFEDAKEK.A	2353.2247	1.01		3
			K.TVDKDGYNAIQIGFEDAKEK.A	2353.2247	0.95		4
			K.VDADKNLILVK.G	1310.8173	0.76		2
			K.VGMTQIFTDK.G	1194.6318	0.99		2
			K.VTVQNLEVVK.V	1183.7176	0.95		2
			R.RPGSMGACSYPGR.V	1422.6496	0.98		3
			R.VDSVEGYTVGQEIK.A	1578.8141	0.81		2
			K.GSVVTIKEAIK.V	1227.7802	0.00		3
			K.GVVIPVTAVEAGPM(15.995)VVTQIK.T	1366.753	0.00		2
			K.GVVIPVTAVEAGPM(15.995)VVTQIK.T	1366.753	0.00		3
			R.RPGSM(15.995)GACSYPGR.V	574.2897	0.00		3
WP_003421188.1	50S ribosomal protein L1	50S			0.95	0.08	23
			K.AKEAEQAGADFVGAEELVQK.I	2174.13	0.76		2
			K.AKEAEQAGADFVGAEELVQK.I	2174.13	0.93		3
			K.EAEQAGADFVGAEELVQK.I	1946.9666	0.91		2
			K.EAEQAGADFVGAEELVQK.I	1946.9666	0.93		3
			K.FDETVEAHIK.L	1243.6449	0.99		3
			K.GLMPNPK.S	811.4626	0.95		2
			K.RVLVFAK.G	887.5957	0.98		2
			K.SGTVTFDVAK.A	1079.5863	1.03		2
			K.TNIIHVPVGK.V	1132.6968	1.01		2
			R.GAVVLPHGTGK.T	1090.6499	0.93		2
			R.LDKTNIIHVPVGK.V	1516.9341	0.83		3
			R.SITVASSMGPGVK.I	1288.7061	1.04		2
			R.SITVASSMGPGVK.I	1288.7061	1.04		3
			K.AKEAEQAGADFVGAEELVQK.I	2174.13	0.00		4
			K.FDETVEAHIK.L	1243.6449	0.00		2
			K.LTENFTALM(15.995)DAIIK.A	1066.5369	0.00		2
			K.LTENFTALM(15.995)DAIIK.A	1066.5369	0.00		3
			R.SITVASSM(15.995)GPGVK.I	822.4157	0.00		2
			R.YAGALQKVDR.T	1175.6663	0.00		2
WP_003428343.1	hypothetical protein	hypothetical			0.95	0.28	23
			-.MKHLYEEVAYLK.G	1606.8793	0.82		3
			K.AVILSSEDDCDDDCTCGGCSSCDDRE.-	3026.0658	1.02		2
			K.AVILSSEDDCDDDCTCGGCSSCDDRE.-	3026.0658	1.01		3
			K.GLAEGLEISAESK.E	1358.7293	0.95		2
			K.GLAEGLEISAESKEGK.M	1700.9196	0.37		2
			K.GLAEGLEISAESKEGK.M	1700.9196	0.87		3
			K.HLYEEVAYLK.G	1319.7125	1.27		2
			-.M(15.995)KHLYEEVAYLK.G	177.0824	0.00		3
			K.AVILSSEDDCDDDCTCGG.C	2015.7394	0.00		2
			K.AVILSSEDDCDDDCTCGGCSS.C	2350.8375	0.00		2
WP_003432442.1	3-methyl-2-oxobutanoate dehydrogenase subunit VorB	3-methyl-2-oxobutanoate			0.95	0.00	2
			K.IIAGELVAGGAR.-	1153.6819	0.95		2
			R.GGPGLGSIQPSQADYFM(15.995)STR.G	1751.8189	0.00		2
			R.GGPGLGSIQPSQADYFM(15.995)STR.G	1751.8189	0.00		3
			R.GGPGLGSIQPSQADYFMSTR.G	2097.0031	0.00		2
			R.GGPGLGSIQPSQADYFMSTR.G	2097.0031	0.00		3
			R.VMTSSSSPGVALK.Q	1318.7166	0.00		2
WP_003438268.1	GTP-sensing pleiotropic transcriptional regulator CodY	GTP-sensing			0.95	0.11	23
			K.ILEIFPEEHGR.L	1366.7245	0.87		3
			K.YTTVVPILGSGQR.L	1417.7929	1.03		2
			R.AIGEELEEEMR.K	1332.6231	0.00		2
WP_004454633.1	xanthine phosphoribosyltransferase	xanthine			0.95	0.06	23
			K.ANDVRLESLAVVESIDNGTVK.F	2285.2308	1.04		3
			K.GFQAGGALLK.A	1016.6019	0.94		2
			K.NLDKDVYETNVYSFTK.A	2020.0234	0.96		3
			R.EGSVSGNDILK.V	1173.6241	0.91		2
			K.NLDKDVYETNVYSFTK.A	2020.0234	0.00		2
WP_009888725.1	4Fe-4S dicluster domain-containing protein	4Fe-4S			0.95	0.00	2
			R.GFGAAGGLTK.A	933.5284	0.95		2
			K.CSNEDIDDASIFGR.G	1625.6992	0.00		2
WP_009893687.1	YggS family pyridoxal phosphate-dependent enzyme	YggS			0.95	0.06	2
			K.EITLLAVTK.T	1042.6638	0.93		2
			K.TVDVDLVNEAMR.E	1388.697	1.05		2
			R.VGTSIFGER.N	992.5291	0.95		2
			K.GLM(15.995)TM(15.995)APFIEDEDEIR.G	347.1879	0.00		2
			K.GLMTM(15.995)APFIEDEDEIR.G	579.276	0.00		2
			K.GLMTMAPFIEDEDEIR.G	1894.8886	0.00		2
			K.TVDVDLVNEAM(15.995)R.E	1232.5959	0.00		2
			R.EGITSVGENKPQELAR.K	1782.9476	0.00		3
			R.IALCEEIQK.R	1158.6318	0.00		2
			R.IALCEEIQKR.A	1314.733	0.00		3
WP_009898301.1	phosphopyruvate hydratase	phosphopyruvate			0.95	0.08	23
			K.GIENGVANSILVK.V	1368.7977	0.95		2
			K.RAGYTAVISHR.S	1257.6942	0.93		3
			R.IEEMVGEQAR.Y	1188.5809	1.07		2
			C.GVGDEGGFAPNLGSNR.E	1573.7485	0.00		2
			K.GLACGVGDEGGFAPNLGSNR.E	1975.9251	0.00		2
			K.LQLVGDDLFVTNTER.L	1746.9152	0.00		2
			K.VNQIGTITETLDAIEM(15.995)AK.R	1774.9023	0.00		3
			R.AIVPSGASTGAFEAVELR.D	1801.9574	0.00		2
			R.AIVPSGASTGAFEAVELR.D	1801.9574	0.00		3
			R.SGETEDSTIADLAVAVNAGQIK.T	2245.1519	0.00		2
			R.SGETEDSTIADLAVAVNAGQIK.T	2245.1519	0.00		3
WP_009902118.1	anaerobic carbon-monoxide dehydrogenase catalytic subunit	anaerobic			0.95	0.11	2
			K.AQCGFGLQGVCCR.I	1539.6745	0.87		2
			Q.CGFGLQGVCCR.I	1340.5788	1.03		2
			R.GLCGADEHTIVGR.N	1411.6878	0.00		3
WP_009902542.1	lactate utilization protein	lactate			0.95	0.11	2
			K.IKVILVGENLGL.-	1322.8537	0.77		2
			K.VILVGENLGL.-	1053.6434	0.95		2
			R.TIASPAVVQR.F	1068.6291	1.04		2
			R.VAAMIFGPK.N	988.578	0.95		2
			K.NVIVVAGMNK.I	1099.6424	0.00		2
			R.YFDAYYCK.T	1184.5212	0.00		2
contaminant_KERATIN05	no description	no			0.95	0.01	2
			K.VTMQNLNDR.L	1117.555	0.96		2
			R.LAADDFR.T	834.4236	0.94		2
			R.ALEEANADLEVK.I	1356.7137	0.00		2
			R.GQVGGDVNVEM(15.995)DAAPGVDLSR.I	1131.523	0.00		2
			R.LLEGEDAHLSSSQFSSGSQSSR.D	2337.0914	0.00		3
contaminant_KERATIN08	no description	no			0.95	0.01	2
			K.VTMQNLNDR.L	1117.555	0.96		2
			R.LAADDFR.T	834.4236	0.94		2
			R.ALEEANADLEVK.I	1356.7137	0.00		2
			R.LLEGEDAHLSSQQASGQSYSSR.E	2378.118	0.00		3
WP_003418513.1	rubrerythrin family protein	rubrerythrin			0.96	0.07	23
			K.AYFNIKAENY.-	1287.6499	0.89		2
			K.LLENLNEGK.I	1084.6128	0.91		2
			K.NLMAGFAGESEAR.N	1379.6504	1.04		2
			K.TEKNLMAGFAGESEAR.N	1765.8669	1.01		3
			K.NLM(15.995)AGFAGESEAR.N	404.2093	0.00		2
			K.TEKNLM(15.995)AGFAGESEAR.N	790.4259	0.00		3
			K.TEKNLMAGFAGESEAR.N	1765.8669	0.00		2
			R.NKYTYYASK.A	1220.6441	0.00		2
			R.NKYTYYASK.A	1220.6441	0.00		3
WP_003420701.1	phosphate butyryltransferase	phosphate			0.96	0.00	2
			K.ALVFFSK.S	866.5266	0.96		2
			K.IANAILVGDIEK.T	1310.781	0.00		2
WP_003420710.1	MFS transporter	MFS			0.96	0.04	23
			K.YFNCDTQEAAHGR.A	1595.6787	0.96		2
			K.YFNCDTQEAAHGR.A	1595.6787	0.95		3
			R.APAAATGIK.R	854.5226	0.88		2
			R.DNMIPYYPLGNFK.N	1626.8116	0.94		2
			R.NAETQGYPIR.V	1175.5935	1.01		2
			R.VAVDTPAHVR.Q	1091.6087	0.96		2
			K.ITTIFVNNTTYGM(15.995)TGGQM(15.995)APTTLVGQR.A	1501.7487	0.00		2
			K.ITTIFVNNTTYGM(15.995)TGGQM(15.995)APTTLVGQR.A	1501.7487	0.00		3
			K.ITTIFVNNTTYGM(15.995)TGGQMAPTTLVGQR.A	1501.7487	0.00		3
			K.NVEVEEVK.-	1000.5441	0.00		2
			K.TEGLQDTQTHYCPGCTHGIIHR.L	2609.1945	0.00		4
			K.TEGLQDTQTHYCPGCTHGIIHR.L	2609.1945	0.00		5
			K.YFNCDTQEAAHGRAPAAATGIK.R	2405.1627	0.00		4
			R.DNM(15.995)IPYYPLGNFK.N	406.1522	0.00		2
			R.DNMIPYYPLGNFK.N	1626.8116	0.00		3
			R.VSEM(15.995)LATLTGAVFVER.V	492.2254	0.00		2
			R.VSEM(15.995)LATLTGAVFVER.V	492.2254	0.00		3
WP_003421175.1	30S ribosomal protein S10	30S			0.96	0.00	2
			R.LIDIANPTPK.T	1136.6805	0.96		2
			K.AGSQVSGPVPLPTEK.Q	1521.8403	0.00		2
WP_003423380.1	carbonic anhydrase	carbonic			0.96	0.02	23
			K.IVVLSCMDTR.L	1220.6257	0.99		2
			K.NAGATIMHPFGSIMR.S	1629.812	0.97		3
			R.GISNDVILTLR.S	1227.7187	0.94		2
			R.LTELLPK.A	868.5634	0.94		2
			K.IVVLSCM(15.995)DTR.L	848.45	0.00		2
			K.SFVENKEYEQYVTSK.H	1934.9707	0.00		3
WP_003424455.1	response regulator transcription factor	response			0.96	0.1	23
			K.ALIEKYPQVITR.E	1485.8919	0.89		3
			K.GIGYTLEKDI.-	1163.6438	1.03		2
			K.ALIEKYPQVITR.E	1485.8919	0.00		2
			K.TINDKFIVFEK.L	1436.8279	0.00		3
WP_003429271.1	PLP-dependent aminotransferase family protein	PLP-dependent			0.96	7.78	23
			K.MIYVIPDFQNPTGR.T	1677.8549	0.99		2
			K.MIYVIPDFQNPTGR.T	1677.8549	0.92		3
			K.MIYVIPDFQNPTGRT.W	1778.9025	20		2
			K.QGADLQASTISQMEVSK.F	1847.9299	0.83		2
			K.VSVAVLEENGR.S	1199.651	0.85		2
			R.SAMQYTTTEGYEPLREK.I	2059.9966	1.18		3
			K.GLVIFLGTFSK.I	1236.7482	0.00		2
			K.M(15.995)IYVIPDFQNPTGR.T	177.0824	0.00		2
			K.NVAYVAGGGFFPNGGR.E	1609.8001	0.00		2
			K.QGADLQASTISQMEVSK.F	1847.9299	0.00		3
			K.TNVNKDDILVTSGSQQGLDFAGK.V	2491.2999	0.00		3
			R.SAM(15.995)QYTTTEGYEPLREK.I	335.1515	0.00		3
			R.SAMQYTTTEGYEPLR.E	1773.8244	0.00		2
			R.SAMQYTTTEGYEPLREK.I	2059.9966	0.00		2
WP_003429730.1	50S ribosomal protein L20	50S			0.96	0.00	2
			K.MLSEMAIQDPEGFAK.L	1721.8368	0.96		2
			K.M(15.995)LSEM(15.995)AIQDPEGFAK.L	177.0824	0.00		2
			K.M(15.995)LSEMAIQDPEGFAK.L	177.0824	0.00		2
			K.MLSEM(15.995)AIQDPEGFAK.L	637.2815	0.00		2
WP_003431048.1	bis(5-nucleosyl)-tetraphosphatase (symmetrical) YqeK	bis(5-nucleosyl)-tetraphosphatase			0.96	0.01	23
			-.MNLENINQR.L	1158.5815	0.95		2
			K.AYLAGMIHDCAK.Y	1404.6894	0.97		3
			K.LCEIYGCDKEK.A	1497.7207	0.00		3
WP_003434098.1	pyrroline-5-carboxylate reductase	pyrroline-5-carboxylate			0.96	0.13	23
			K.AICACIEK.S	1019.5144	0.87		2
			K.FASQAVMGSAK.M	1151.6009	0.96		2
			K.SIKDIESIIGEDKK.I	1685.9815	1.13		3
			K.DMVCSPGGTTIEAVK.V	1619.7899	0.00		2
			K.FASQAVM(15.995)GSAK.M	780.384	0.00		2
			K.LVEPNMVIASAYSQGTLDR.I	2092.0704	0.00		3
			K.SIKDIESIIGEDKK.I	1685.9815	0.00		4
			R.IDANFGINTTK.D	1248.6714	0.00		2
WP_003435816.1	DUF1847 domain-containing protein	DUF1847			0.96	0.05	23
			K.IAYNAGLVEAEGYCQYTR.L	2105.9922	0.95		2
			K.IAYNAGLVEAEGYCQYTR.L	2105.9922	0.96		3
			K.STIGLEASQTISK.C	1389.7715	1.04		2
			K.AKQLYEEEENRK.I	1619.8519	0.00		3
			K.AKQLYEEEENRK.I	1619.8519	0.00		4
			K.CSDEVM(15.995)CNPIGQALFLNEAK.V	767.283	0.00		2
			K.CSDEVM(15.995)CNPIGQALFLNEAK.V	767.283	0.00		3
			K.CSDEVMCNPIGQALFLNEAK.V	2352.0993	0.00		2
			K.QLYEEEENRK.I	1392.6885	0.00		3
			K.YMEAPITTLVVK.D	1419.8047	0.00		2
WP_003436878.1	HD domain-containing protein	HD			0.96	0.00	3
			R.AILGHHDGMGVTR.T	1390.714	0.96		3
			-.MREEALEILFK.Y	1433.7952	0.00		3
			K.HCYAVEAVMR.E	1262.59	0.00		2
			K.KENFGDEEMYR.A	1472.6606	0.00		3
			K.NISDVLESAENN.-	1331.6205	0.00		2
			R.AILGHHDGM(15.995)GVTR.T	977.4753	0.00		3
			R.AILGHHDGMGVTR.T	1390.714	0.00		2
			R.KHCYAVEAVMR.E	1418.7163	0.00		3
WP_003436909.1	bifunctional enoyl-CoA hydratase/phosphate acetyltransferase	bifunctional			0.96	0.00	2
			R.NIITPILVGNEGK.I	1422.8446	0.96		2
			K.LLITTDGGM(15.995)NIAPDYEQK.A	947.4998	0.00		2
WP_004454137.1	MBL fold metallo-hydrolase	MBL			0.96	0	23
			R.TDLYSGDFNQMEK.S	1602.7236	0.96		2
			R.VYPGHGPTSTLGVEK.K	1596.8512	0.96		3
			K.FVDSYFGVNTYVLGDEK.T	2008.9863	0.00		2
			K.NLSYTMR.C	911.4535	0.00		2
			R.TDLYSGDFNQM(15.995)EK.S	1317.5547	0.00		2
			R.TDLYSGDFNQM(15.995)EK.S	1317.5547	0.00		3
			R.VEDEM(15.995)FTGDTLFAGSIGR.T	649.2629	0.00		2
			R.VEDEMFTGDTLFAGSIGR.T	1972.9282	0.00		2
			R.VYPGHGPTSTLGVEK.K	1596.8512	0.00		2
			R.VYPGHGPTSTLGVEKK.T	1752.9774	0.00		4
WP_009892113.1	thymidylate kinase	thymidylate			0.96	0.16	2
			K.ATQTEILYER.L	1250.6507	1.07		2
			K.LIIIESGSDASGK.A	1344.7501	0.85		2
			K.NASDVDPYIASTFFTADR.Y	2017.9462	0.00		2
WP_009892132.1	GntR family transcriptional regulator	GntR			0.96	0.12	23
			K.AEQFMIDK.A	1036.5263	0.76		2
			R.ASLEGLAAYLAAER.I	1461.7827	0.98		2
			R.ASLEGLAAYLAAER.I	1461.7827	0.95		3
			R.DVVFENLR.E	1018.5447	1.03		2
			K.LNLDNYKPLR.D	1300.7503	0.00		3
			R.ISDEDIKK.L	1030.591	0.00		2
WP_009895750.1	cell division protein ZapA	cell			0.96	0.03	23
			R.ATIAENLASEFQNK.A	1590.8253	0.98		2
			R.ATIAENLASEFQNK.A	1590.8253	0.94		3
			K.AYDLQLK.C	905.5222	0.00		2
			K.IHGAEYPMVGDKSEK.F	1743.8866	0.00		3
			K.VGASNEELQLEIK.S	1484.8086	0.00		2
WP_009897862.1	pyruvate:ferredoxin (flavodoxin) oxidoreductase	pyruvate:ferredoxin			0.96	0.04	23
			K.ATPAAAMAK.F	886.4946	0.95		2
			K.LAEIIPEEDAVK.Y	1381.7705	0.99		2
			K.TVFDNLVSEQPK.N	1431.761	0.97		2
			K.VAGELLPGVFHVSAR.A	1578.8882	0.94		3
			R.ALASQALSIFGDHQDVMAAR.Q	2129.0769	0.93		3
			R.GTAQNPDIYFQTR.E	1537.7525	1.03		2
			K.LGQEIGLGNR.I	1083.6037	0.00		2
			K.QFPEEADGLFAK.A	1406.7082	0.00		2
			R.ALASQALSIFGDHQDVM(15.995)AAR.Q	1829.8982	0.00		3
			R.INMIMQSAFFK.L	1384.7247	0.00		2
WP_009897956.1	cell wall-binding protein Cwp2	cell			0.96	0.08	24
			K.IYIVGGESAVSNTAK.K	1563.8508	0.88		2
			K.TDITDSQK.N	962.492	0.96		2
			K.YTDNIVIVNSNK.L	1434.7718	0.96		2
			K.YTGGSQVGQPIYEIK.V	1694.8879	1.06		2
			R.LAGDDRHMTSVAVAK.A	1625.8559	0.87		4
			K.APIIVNGWNDLSADAIK.L	1853.0128	0.00		2
			K.GEADAM(15.995)SIAAK.A	620.2476	0.00		2
			K.LVDGLAATPLAQSK.K	1438.8395	0.00		3
			K.NSDLNTVSPQDLYDGYR.L	1984.9208	0.00		2
			K.VIETYYGKLDK.L	1411.7963	0.00		3
WP_009901929.1	ABC transporter ATP-binding protein	ABC			0.96	0.01	2
			K.VTALNNVNLSVQK.G	1454.8457	0.97		2
			R.IVTMEDGVIVSEK.V	1474.7953	0.95		2
			K.GDFVSIVGASGSGK.S	1335.7034	0.00		2
			R.IVTM(15.995)EDGVIVSEK.V	490.2825	0.00		2
WP_009901962.1	hypothetical protein	hypothetical			0.96	0.08	234
			K.DGVFDPGENSVGLSIDGIGR.A	2031.9943	0.99		2
			K.FFEILNNVGIK.T	1348.7755	0.98		2
			K.GLELYDIK.F	1005.5747	0.96		2
			K.ISNIVRDTIAEK.G	1413.8191	0.98		2
			K.ISNIVRDTIAEK.G	1413.8191	0.87		3
			K.THYVSANLEEATMEVLPAK.V	2159.1014	1.02		2
			K.THYVSANLEEATMEVLPAK.V	2159.1014	0.96		3
			K.THYVSANLEEATMEVLPAK.V	2159.1014	0.97		4
			K.TKDVFELDNGNYLLK.F	1853.0016	0.92		2
			K.TKDVFELDNGNYLLK.F	1853.0016	0.94		3
			K.VFGNGLEVICR.Y	1290.6754	0.98		2
			R.ANLETSVK.F	916.5229	0.9		2
			R.AVGSFLRR.Y	932.5556	0.96		2
			R.RYGSCVEEGAK.L	1310.6289	0.68		3
			K.DVFELDNGNYLLK.F	1594.8243	0.00		2
			K.GLELYDIKFEFGFYNDEVILIDEIASGNM(15.995)R.V	3411.6747	0.00		3
			K.THYVSANLEEATM(15.995)EVLPAK.V	1492.6868	0.00		2
			K.THYVSANLEEATM(15.995)EVLPAK.V	1492.6868	0.00		3
			K.THYVSANLEEATM(15.995)EVLPAK.V	1492.6868	0.00		4
			R.VYKDGVIVDPM(15.995)DLTALLLDK.-	1290.6894	0.00		3
			R.VYKDGVIVDPMDLTALLLDK.-	2302.2939	0.00		3
			R.YGSCVEEGAK.L	1154.5278	0.00		2
			V.SANLEEATMEVLPAK.V	1657.8597	0.00		2
WP_009902717.1	radical SAM protein	radical			0.96	0.00	2
			K.IGVETFDNYFR.N	1387.6772	0.96		2
			-.MDRYSEITNKNQR.E	1709.8519	0.00		3
contaminant_KERATIN03	no description	no			0.96	0.14	23
			K.GSLGGGFSSGGFSGGSFSR.G	1734.7962	0.99		2
			K.IRLENEIQTYR.S	1461.794	0.92		3
			K.NHEEEMKDLR.N	1355.6504	0.89		3
			K.QSLEASLAETEGR.Y	1417.7049	0.95		2
			K.VTMQNLNDR.L	1117.555	0.96		2
			L.GGGFSSGGFSGGSFSR.G	1477.6586	1.03		2
			R.AETECQNTEYQQLLDIK.I	2139.0235	0.54		2
			R.ALEESNYELEGK.I	1436.7035	0.87		2
			R.LAADDFR.L	834.4236	0.94		2
			R.LKYENEVALR.Q	1289.7343	1.06		2
			R.LKYENEVALR.Q	1289.7343	1.07		3
			R.SLLEGEGSSGGGGR.G	1289.6212	1.1		2
			R.SQYEQLAEQNRK.D	1548.7896	1.03		3
			R.VLDELTLTK.A	1086.6536	0.88		2
			K.HYSSSRSGGGGGGGGCGGGGGVSSLR.I	2295.024	0.00		3
			R.SQYEQLAEQNRK.D	1548.7896	0.00		2
contaminant_KERATIN22	no description	no			0.96	0.09	23
			K.AQYEEIAQR.S	1134.5669	0.97		2
			K.GGSISGGGYGSGGGK.H	1252.6048	0.96		2
			R.FLEQQNQVLQTK.W	1530.8406	0.92		2
			R.GFSSGSAVVSGGSR.R	1281.6313	0.99		2
			R.GFSSGSAVVSGGSRR.S	1437.7324	0.79		3
			R.HGGGGGGFGGGGFGSR.S	1347.6068	1.09		3
			R.NLDLDSIIAEVK.A	1384.7814	1.06		2
			R.TAAENDFVTLK.K	1263.6711	0.95		2
			K.AAFGGSGGRGSSSGGGYSSGSSSYGSGGR.Q	2529.0946	0.00		3
			K.HSSGGGSRGGSSSGGGYGSGGGGSSSVK.G	2370.0626	0.00		3
			K.NVQDAIADAEQR.G	1356.6634	0.00		2
			R.GGSGGGGSISGGGYGSGGGSGGR.Y	1768.7725	0.00		2
			R.GSSSGGGYSSGSSSYGSGGR.Q	1767.7296	0.00		2
			R.TAAENDFVTLKK.D	1419.7973	0.00		2
			R.TAAENDFVTLKK.D	1419.7973	0.00		3
			R.YLDGLTAER.T	1064.5502	0.00		2
WP_003420702.1	butyrate kinase	butyrate			0.97	0.09	23
			K.ILTINPGSTSTK.I	1286.7446	0.83		2
			K.IVDVANALDGEGPFSPER.S	1913.9564	0.97		2
			K.IVDVANALDGEGPFSPER.S	1913.9564	0.96		3
			K.TSELDAVVGR.G	1073.5717	1.06		2
			R.VLTGEEEAQVYDN.-	1493.6886	1.05		2
			R.ASVVHALNQK.A	1121.6557	0.00		2
WP_003420866.1	NAD-specific glutamate dehydrogenase	NAD-specific			0.97	0.04	23
			K.GGIIVDPSTLSQGELER.L	1797.9472	0.98		2
			K.IKEEYNVTMR.E	1337.7013	0.9		3
			K.LVCEAANGPTTPEADEVFAER.G	2304.0773	0.97		2
			K.LVCEAANGPTTPEADEVFAER.G	2304.0773	1		3
			R.GYIDGIYK.L	983.5328	0.91		2
			K.AKLVCEAANGPTTPEADEVFAER.G	2531.2407	0.00		3
			K.CSVTGIPYGGGK.G	1250.6329	0.00		2
			K.IAVQGIGNVGSYTVLNCEK.L	2078.0911	0.00		2
			R.TAATGFGVAVTAR.E	1248.6826	0.00		2
			R.TAATGFGVAVTARE.A	1377.7252	0.00		2
WP_003421121.1	30S ribosomal protein S4	30S			0.97	0.13	234
			K.AGENLLSLLER.R	1241.698	0.97		2
			K.FKNLVEVNSR.I	1260.719	0.9		2
			K.FKNLVEVNSR.I	1260.719	0.93		3
			K.KVSNYGLQLR.E	1232.7241	0.95		2
			K.KVSNYGLQLR.E	1232.7241	1.08		3
			K.NLVEVNSR.I	957.5243	0.98		2
			K.RNYAPGQHGQGR.K	1367.6807	1.09		3
			K.VDIPSLIVK.V	1038.6689	0.94		2
			K.VGDVIEVK.E	913.5484	0.92		2
			K.VGDVIEVKEK.S	1198.7173	0.92		2
			K.VGDVIEVKEK.S	1198.7173	1.05		3
			K.VSNYGLQLR.E	1076.5978	0.98		2
			K.VVGVPTREDIDLEIAEHLIIELYSK.-	2907.6038	0.54		3
			K.VVGVPTREDIDLEIAEHLIIELYSK.-	2907.6038	0.73		4
			K.WLEANVEGMTAK.V	1403.7119	1.02		2
			R.AENMPGK.A	801.4055	1.13		2
			R.IYGVLETQFR.N	1252.6816	0.94		2
			R.KKVSNYGLQLR.E	1388.8504	0.98		2
			R.KKVSNYGLQLR.E	1388.8504	0.92		3
			R.NYAPGQHGQGR.K	1211.5796	0.99		2
			R.NYAPGQHGQGR.K	1211.5796	1.01		3
			K.WLEANVEGM(15.995)TAK.V	1075.5008	0.00		2
			R.AENMPGKAGENLLSLLER.R	1998.0649	0.00		3
			R.CYTDKCAIVKR.N	1496.7843	0.00		3
			R.NLYERAENMPGK.A	1476.7395	0.00		2
WP_003421197.1	FAD-dependent thymidylate synthase	FAD-dependent			0.97	0.04	23
			R.NLAVEMLR.E	972.5426	0.97		2
			R.SLFNFFEHR.C	1223.6087	1.04		3
			R.YVFPNACETK.M	1283.622	0.96		2
			K.TGPSCVNGSCPEGTM(15.995)TCGDIVQVR.E	1580.6269	0.00		2
			K.TGPSCVNGSCPEGTM(15.995)TCGDIVQVR.E	1580.6269	0.00		3
			K.TGPSCVNGSCPEGTMTCGDIVQVR.E	2610.1376	0.00		2
			K.TGPSCVNGSCPEGTMTCGDIVQVR.E	2610.1376	0.00		3
WP_003421448.1	ribose-phosphate pyrophosphokinase	ribose-phosphate			0.97	0.08	2
			K.LVANLITAAGADR.V	1311.7511	0.91		2
			K.TVAPLFGDAIR.M	1186.671	1.03		2
			R.ITAVIPYYGYAR.Q	1413.7656	0.00		2
WP_003425288.1	amidophosphoribosyltransferase	amidophosphoribosyltransferase			0.97	0.06	23
			K.ACFDGEYPVK.K	1240.5798	1.01		2
			R.ITSPPVAYSCYYGIDTPNR.S	2202.0497	0.93		2
			R.ITSPPVAYSCYYGIDTPNR.S	2202.0497	0.93		3
			R.YSTAGGSHVSNCQPLVGSCR.K	2164.9823	1.05		3
			K.IKLNPLSTIIK.G	1322.8901	0.00		3
			R.GQESCGLALLDDGEIK.Y	1759.8662	0.00		2
			R.NDATIDNVNAYEFR.I	1668.7744	0.00		2
			R.TFIKPTQEER.E	1303.7136	0.00		3
WP_003427760.1	electron transfer flavoprotein subunit beta/FixA family pro	electron			0.97	0.18	23
			K.QVPDTNEVR.I	1084.5513	1.01		2
			K.VGDYDIIFAGR.Q	1252.6452	1		2
			K.VSTPVLLTAVK.E	1182.7588	0.94		2
			K.VWTIDDLDVNKEEVGLK.A	2057.1126	0.53		3
			R.AFGGADTWATSNTIAAGISK.V	1995.0143	0.91		2
			R.QAIDGDTAQVGPQIAEK.L	1795.9316	1.06		2
			R.QLEDGYELIK.V	1262.6758	0.87		2
			R.SFTPEPR.G	860.4392	1.12		2
			R.ECLAM(15.995)GADDAILLSDR.A	650.2768	0.00		2
			R.ECLAMGADDAILLSDR.A	1776.8386	0.00		2
WP_003431170.1	guanylate kinase	guanylate			0.97	0.15	234
			K.AAIMECLEK.G	1119.5668	1.02		2
			K.GLLLVVSGPSGAGK.G	1309.7969	0.97		2
			R.GTETEAEIEKR.F	1317.6776	0.66		3
			R.IVGRGTETEAEIEKR.F	1742.9527	1		4
			R.TGEVDGVNYFFISK.E	1630.8243	0.94		2
			K.ELLKENDTIK.L	1285.7493	0.00		2
			K.GQDVLLEIEM(15.995)QGAK.Q	1173.5951	0.00		2
			R.GTETEAEIEK.R	1161.5765	0.00		2
WP_003432205.1	amino acid ABC transporter ATP-binding protein	amino			0.97	0.1	23
			K.DSYPSQLSGGQK.Q	1321.6514	0.85		2
			K.EGMTMAIVTHEMGFAK.E	1807.8671	1.03		3
			K.SFGDLNVLK.N	1047.5964	1.05		2
			K.TILDNITLAPIK.L	1366.8436	0.91		2
WP_003436178.1	elongation factor G	elongation			0.97	0.1	23
			K.GGVEPQSENVWR.Q	1384.6735	0.99		2
			R.ILFYTGQTHK.I	1262.7023	0.97		3
			R.VAPQEPGEGYK.F	1229.6292	0.81		2
			K.TVGGSVPK.E	799.4804	0.00		2
			R.QAETYGVPR.I	1047.5349	0.00		2
			R.VYSGTLESGSYVLNATK.N	1844.9601	0.00		2
WP_003436372.1	ABC transporter ATP-binding protein	ABC			0.97	0.00	2
			R.NASIYILDEPIGGVDPAAR.S	1999.0456	0.97		2
WP_003436678.1	imidazole glycerol phosphate synthase subunit HisH	imidazole			0.97	0.13	2
			K.SGEVGLNILR.A	1084.6241	1.06		2
			K.SYEYGEYEGLGLIK.G	1675.8345	0.87		2
WP_009891688.1	hypoxanthine phosphoribosyltransferase	hypoxanthine			0.97	0.02	2
			R.NINLPLR.V	866.5338	0.97		2
			R.NVPYIFNVTDEDR.-	1608.7784	1		2
			R.VNFMTTSSYGNNEESTGK.V	2021.9081	0.96		2
			K.HLKAKNPASLKCCVLLDK.P	2235.304	0.00		3
			R.VNFMTTSSYGNNEESTGKVK.V	2277.1028	0.00		3
WP_009901935.1	response regulator transcription factor	response			0.97	0.00	2
			K.AYLDNVEVPLTAGEYK.L	1837.9543	0.97		2
WP_009902568.1	ATP phosphoribosyltransferase	ATP			0.97	0.00	2
			K.MGLGDSIDTDTR.K	1307.6027	0.97		2
WP_003416253.1	zinc metallopeptidase	zinc			0.98	0.01	23
			R.AIVQLGNLGIIDESESR.Q	1840.9894	0.99		2
			R.AIVQLGNLGIIDESESR.Q	1840.9894	0.97		3
			R.VLDSNGLYDVK.I	1277.6867	0.00		2
WP_003417102.1	ATP-dependent Clp endopeptidase proteolytic subunit ClpP	ATP-dependent			0.98	0.11	23
			K.ETLNEILSER.T	1230.6456	1.09		2
			K.EYGLIDEVFTKRP.-	1621.8716	0.91		3
			K.IKETLNEILSER.T	1499.8559	0.8		2
			K.IKETLNEILSER.T	1499.8559	0.88		3
			M.ALVPVVVEQTGR.G	1294.7609	0.99		2
			M.ALVPVVVEQTGRGER.S	1636.9261	1.01		2
			R.SYDIFSR.L	914.4498	1.14		2
			R.TGQPLEK.I	827.4753	0.96		2
			K.EYGLIDEVFTK.R	1368.7177	0.00		2
			K.EYGLIDEVFTKRP.-	1621.8716	0.00		2
			K.IKMDTERDNFMSALEAK.E	2083.0523	0.00		4
			K.MDTERDNFMSALEAK.E	1812.8386	0.00		3
			R.DNFMSALEAK.E	1180.5798	0.00		2
WP_003417347.1	electron transfer flavoprotein subunit alpha/FixB family pr	electron			0.98	0.09	23
			K.IAPVVIELLGEGR.K	1392.8341	0.98		2
			K.IAPVVIELLGEGRK.L	1548.9603	0.86		3
			K.NVWIFAEQR.E	1189.6244	1.1		2
			R.TGEVIALDYK.I	1163.6438	0.97		2
			R.TTVLETVK.T	945.5747	1.01		2
WP_003419125.1	enoyl- enoyl-	enoyl-			0.98	0.03	23
			K.VIPVVPTIALAQR.M	1403.8864	0.96		2
			K.VIPVVPTIALAQR.M	1403.8864	1		3
			R.FICSEECSVHSNYK.N	1814.7968	0.00		3
WP_003421163.1	30S ribosomal protein S3	30S			0.98	0.11	2
			R.ADIDYGFAEADTTYGK.I	1791.8203	0.9		2
			R.TEGYSEGNVPLQTLR.A	1690.8526	1.06		2
WP_003421187.1	50S ribosomal protein L10	50S			0.98	0.09	23
			K.APVSNFAYLIDAIAK.K	1647.9236	0.94		2
			K.GFMDSHPK.M	973.4691	0.92		2
			K.GLTVEEVTELRK.Q	1428.8188	0.98		3
			K.IVEMANIPSR.E	1156.6274	0.98		2
			K.IVEMANIPSREVLIAK.L	1839.0733	0.85		3
			K.MGIVEGAFYDESK.I	1500.717	1.13		2
			K.SEVVSEIVEK.L	1173.6493	0.99		2
			K.SEVVSEIVEKLQK.S	1570.9182	1.07		3
			K.SSAAVVVDYK.G	1093.6019	1		2
			N.AIAFGYDDPVAPAR.I	1489.7565	1.06		2
			R.EAGVDYKVYK.N	1254.686	0.85		2
			R.EAGVDYKVYK.N	1254.686	0.89		3
			K.APVSNFAYLIDAIAK.K	1647.9236	0.00		3
			K.GLTVEEVTELRK.Q	1428.8188	0.00		2
			K.M(15.995)GIVEGAFYDESK.I	177.0824	0.00		2
WP_003421367.1	F0F1 ATP synthase subunit alpha	F0F1			0.98	0.13	2
			R.IVEVPVGEALIGR.V	1378.8184	0.88		2
			R.SVYEPLQTGIK.S	1289.7231	1.07		2
			R.STIAQLVSSLEK.G	1330.7708	0.00		2
WP_003429565.1	phosphoglycerate kinase	phosphoglycerate			0.98	0.1	23
			K.EVVFAADDNVVGENAK.K	1731.8679	0.87		2
			K.GEAKPELSLAPVAK.R	1492.8865	1.11		3
			K.TIANFVK.T	847.5167	0.95		2
			R.AHCSTVGAGEFLQER.V	1688.7941	1.02		3
			K.EVVFAADDNVVGENAKK.A	1888.9976	0.00		3
			K.MENGDVVLLENTR.Y	1516.7555	0.00		2
			R.AHCSTVGAGEFLQER.V	1688.7941	0.00		2
WP_003430159.1	NifB/NifX family molybdenum-iron cluster-binding protein	NifB/NifX			0.98	0.01	34
			K.LVEFPSDHTCSHDGCGHH.-	2119.867	0.97		3
			K.LVEFPSDHTCSHDGCGHH.-	2119.867	0.98		4
WP_003431407.1	D-2-hydroxyacid dehydrogenase	D-2-hydroxyacid			0.98	0.12	23
			K.DGAYIVNTGR.G	1092.5564	1.1		2
			K.ILVFGAR.D	802.5065	1.03		2
			R.AAALDTFETEGLFLNK.K	1795.9437	0.84		3
			R.AAALDTFETEGLFLNKK.M	1952.07	0.83		3
			R.SITVGVIGTGK.I	1086.6649	1.07		2
			R.WIAELLGTEVR.S	1313.7343	0.92		2
			R.AAALDTFETEGLFLNK.K	1795.9437	0.00		2
			R.AAALDTFETEGLFLNKK.M	1952.07	0.00		2
WP_003434235.1	protein jag	protein			0.98	0.05	2
			K.GFLGFIGAK.D	964.5746	0.94		2
			R.VLVDIENYR.S	1147.6237	1.01		2
WP_003435194.1	ATP-dependent chaperone ClpB	ATP-dependent			0.98	0.03	23
			K.VYGEGADSQGVSATR.K	1523.7216	1.01		2
			R.GSQRVETQDPEGTYDALAR.Y	2121.0168	0.95		3
			R.VETQDPEGTYDALAR.Y	1691.8003	0.98		2
WP_003435562.1	serine--tRNA ligase	serine--tRNA			0.98	8.52	23
			K.MEYTLMR.I	970.4616	0.97		2
			K.YCAYTPCFR.S	1264.5369	1.02		2
			R.IPNVPHPEVPQGETDEDNVQIR.T	2511.2435	0.98		3
			R.IRENLDDIKK.A	1326.7871	0.8		3
			R.LKELSDKIK.G	1184.7744	20		3
			R.SLMNFFLNTHTAK.H	1578.8228	0.00		3
WP_003435635.1	glucose-6-phosphate isomerase	glucose-6-phosphate			0.98	0.00	2
			K.SGTTTEPALAFR.I	1277.6616	0.98		2
			R.AAIDMVSHSFR.N	1260.6285	0.00		3
WP_004454389.1	2-hydroxyglutaryl-CoA dehydratase	2-hydroxyglutaryl-CoA			0.98	7.78	23
			-.MFSIGVDSGSVATK.G	1453.7487	0.99		2
			K.IIIPTGWSPK.S	1166.7063	0.85		2
			K.KVTEITCHTR.G	1299.6969	0.88		3
			K.STSMLAR.G	792.4164	20		2
			K.VVGTGYGR.G	835.4552	0.98		2
			R.GIYFLNK.N	909.5324	0.99		2
			-.M(15.995)FSIGVDSGSVATK.G	177.0824	0.00		2
			K.GVLFDGEK.I	919.5015	0.00		2
			K.KIIIPTGWSPK.S	1322.8326	0.00		3
			K.MIEEILGK.K	987.5675	0.00		2
			K.MIEEILGKK.I	1143.6937	0.00		2
			K.QVYELLSSEIDKK.D	1634.9131	0.00		3
			R.GEVIDEVAFTGGLAK.S	1560.8399	0.00		2
			R.GEVIDEVAFTGGLAK.S	1560.8399	0.00		3
			R.GVMDFADK.K	937.4579	0.00		2
			R.TILDVGGQDSK.V	1187.6398	0.00		2
WP_009888460.1	response regulator transcription factor	response			0.98	0.00	2
			R.VFLASSYEEAVR.V	1397.7191	0.98		2
			R.VYVPIEEEELPVFK.L	1746.9525	0.00		2
WP_009889023.1	elongation factor P	elongation			0.98	0.08	234
			-.MVSAGDFR.K	909.4378	0.99		2
			K.FLKENEVATIR.F	1374.7871	0.96		2
			K.FLKENEVATIR.F	1374.7871	0.97		3
			K.TGAIREESFNPSEK.F	1619.8155	1.06		3
			K.TGAIREESFNPSEKFPK.A	2021.0663	0.88		4
			R.TGEYLSRV.-	951.5025	1.11		2
			K.TGAIREESFNPSEKFPK.A	2021.0663	0.00		3
WP_009890976.1	polysaccharide deacetylase family protein	polysaccharide			0.98	0.00	4
			R.TKENSIICLHDAGENSGGAVGAPER.T	2638.285	0.98		4
			R.TKENSIICLHDAGENSGGAVGAPER.T	2638.285	0.00		3
WP_009893498.1	GNAT family N-acetyltransferase	GNAT			0.98	0.00	2
			R.MDDLDTIAK.F	1076.5424	0.98		2
WP_009896192.1	cysteine desulfurase NifS	cysteine			0.98	0.05	23
			K.GVGALYIR.K	875.5229	1.02		2
			R.LHNFVHGGAQEK.S	1391.731	0.95		3
			K.ENMQNHVETLTR.L	1498.7198	0.00		3
			R.AGTENIPAIVGYGK.A	1444.7926	0.00		2
WP_009896932.1	response regulator transcription factor	response			0.98	0.00	2
			R.EGYEIVEAGTGR.E	1307.6357	0.98		2
			K.EIELTPTEFSIVK.Y	1560.8651	0.00		2
			R.EGYEIVEAGTGREAIEK.M	1906.9717	0.00		2
WP_009898446.1	pyrroline-5-carboxylate reductase	pyrroline-5-carboxylate			0.98	0.07	23
			K.FASQAVMGSAK.M	1151.6009	0.96		2
			K.NSNVTDEELNMIK.A	1561.7658	0.91		2
			K.TIESLESFIGSDK.K	1480.7661	0.99		2
			K.TIESLESFIGSDKK.I	1636.8924	1		3
			R.VMPNTPALVGEGMSALCK.N	1930.976	1.01		2
			R.VMPNTPALVGEGMSALCK.N	1930.976	0.84		3
			K.AEDITVSDLSQVALDK.V	1758.9251	0.00		2
			K.FASQAVM(15.995)GSAK.M	780.384	0.00		2
			K.NSNVTDEELNM(15.995)IK.A	1292.5555	0.00		2
			K.SIVACIDKSK.D	1203.6897	0.00		3
			R.VM(15.995)PNTPALVGEGMSALCK.N	276.1508	0.00		2
			R.VM(15.995)PNTPALVGEGMSALCK.N	276.1508	0.00		3
WP_009901735.1	phosphoribosylformylglycinamidine synthase	phosphoribosylformylglycinamidine			0.98	0.21	2
			K.FVASEDVMR.E	1080.5274	0.96		2
			K.LGLVPYGEIR.V	1143.6652	1.01		2
			K.LVAIGGNYSTTR.L	1278.6932	0.67		2
			R.VFIPAFPGTNCEYDSAR.A	1971.923	1.18		2
			R.MEIGAVIAAAPK.E	1225.7104	0.00		2
			R.TTLEDTLPGK.L	1129.6231	0.00		2
			R.VQEAINEFLTQK.D	1474.8031	0.00		2
WP_009902802.1	shikimate dehydrogenase	shikimate			0.98	0.11	23
			-.MNFFGLVGEK.L	1196.6264	0.93		2
			K.AALTYFIDSGIEK.L	1482.797	1.07		2
			K.AILIDYEELK.H	1261.717	0.84		2
			K.TCDGLYMLVGQAIK.S	1623.8364	1.16		2
			K.TCDGLYMLVGQAIK.S	1623.8364	0.98		3
			K.YLDFISPEAK.R	1237.6594	1.12		2
			R.AVNTILLR.E	926.5913	0.97		2
			K.AILIDYEELKHIK.G	1667.9862	0.00		4
			K.LLGIQGVNVTVPYK.E	1555.9338	0.00		2
			K.MANIDVQGK.V	1030.5481	0.00		2
			K.TCDGLYM(15.995)LVGQAIK.S	886.3565	0.00		2
			K.YLDFISPEAKR.I	1393.7606	0.00		3
WP_009903412.1	SIS domain-containing protein	SIS			0.98	0.07	23
			K.SSNFGSSDFYK.Y	1293.5877	0.98		2
			K.TIAFTSNR.N	936.5029	1.06		2
			K.TMVDVMTTEMNAIR.C	1638.7779	1.02		2
			K.TMVDVMTTEMNAIR.C	1638.7779	0.99		3
			K.VIFMGVGK.S	905.5408	0.92		2
			K.YHPGGSLGEK.L	1099.5662	0.86		2
			K.TM(15.995)VDVM(15.995)TTEMNAIR.C	278.13	0.00		2
			K.TM(15.995)VDVMTTEMNAIR.C	278.13	0.00		2
			K.TM(15.995)VDVMTTEMNAIR.C	278.13	0.00		3
			K.TMVDVM(15.995)TTEM(15.995)NAIR.C	722.3343	0.00		2
			K.TMVDVM(15.995)TTEMNAIR.C	722.3343	0.00		2
			K.TMVDVMTTEM(15.995)NAIR.C	1184.5127	0.00		2
WP_003419057.1	septum site-determining protein MinD	septum			0.99	0.29	23
			R.AIVVTNPEISAVR.D	1395.8086	1.01		2
			R.IVYDIVDVVEGTCR.L	1664.8444	0.49		2
			R.IVYDIVDVVEGTCR.L	1664.8444	0.99		3
			R.IIGLLEANEIKEIR.L	1666.0029	0.00		3
			R.NLDVVMGLENR.I	1286.6653	0.00		2
WP_003420269.1	TerD family protein	TerD			0.99	0.05	23
			K.GQKVDLTK.G	971.6015	0.92		2
			R.QNFGQVSNSYIR.I	1439.7157	1.04		2
			R.RQNFGQVSNSYIR.I	1595.8168	0.99		2
			R.RQNFGQVSNSYIR.I	1595.8168	0.99		3
			R.TGEGDGDDEQIVVDLSK.I	1831.8687	0.95		2
			K.HTSGAVEHLGDNR.T	1419.6855	0.00		3
WP_003420839.1	redox-sensing transcriptional repressor Rex	redox-sensing			0.99	0.02	23
			K.ALFDANPR.M	930.4923	0.99		2
			K.ELSDIIGFTASQIR.Q	1576.8461	0.95		2
			K.ELSDIIGFTASQIR.Q	1576.8461	0.99		3
			K.GVWNFAPLDLEVPK.G	1639.8974	0.99		2
			K.NGAQEVINR.V	1027.5411	0.96		2
			K.NISMAVIR.R	930.5321	1.01		2
			K.NNNIDIAVLCIPK.N	1538.8491	1.01		2
			K.IREFEVLDSDTLEDFIKNNNIDIAVLCIPK.N	3618.913	0.00		4
			R.QDLNNFGGFGQQGYGYNVEALHTEIGK.I	3012.4447	0.00		3
WP_003428191.1	pyridoxamine kinase	pyridoxamine			0.99	0.03	23
			K.HSDLTTPNLTEACFLTGNDYTK.S	2554.2091	0.99		3
			K.KVAAINDLSGIGK.C	1368.8341	0.99		3
			K.SDYNRDELIYIAK.S	1654.8566	0.98		3
			K.VAAINDLSGIGK.C	1212.7078	0.99		2
			K.VNFDSIYSGFLGSK.H	1588.8137	0.91		2
			K.CSLSVAIPILSALK.V	1526.9106	0.00		2
WP_003428415.1	transcription antitermination factor NusB	transcription			0.99	0.00	2
			K.VDVSILR.L	828.5069	0.99		2
			K.IYCDDKSPK.F	1208.6111	0.00		3
WP_003430302.1	TerD family protein	TerD			0.99	0.08	23
			K.FNALGSGFEDGLAGLCK.N	1810.8924	0.96		2
			K.FNALGSGFEDGLAGLCK.N	1810.8924	1.05		3
			K.HASGAVEYMGDNR.T	1433.6358	1.14		2
			K.HASGAVEYMGDNR.T	1433.6358	1.11		3
			K.VTNDGDFIFYNNLK.H	1714.8566	0.93		2
			R.QNFGQVENSYIR.I	1481.7263	0.93		2
			R.RQNFGQVENSYIR.I	1637.8274	0.97		2
			R.RQNFGQVENSYIR.I	1637.8274	1.03		3
			R.TGVGDGDDEQINVDLSK.I	1816.8691	0.99		2
			R.TGVGDGDDEQINVDLSKIPQNIAK.I	2610.3582	0.00		3
WP_003434506.1	dihydroorotate dehydrogenase electron transfer subunit	dihydroorotate			0.99	0.11	2
			K.MGQFYMLR.A	1072.5198	1.03		2
			K.VALVGGGIGVAPLYLVAK.N	1753.0947	0.99		2
			K.VVGEGTQILSNLK.V	1412.8239	0.82		2
			K.ILENIYIGEDMYR.M	1655.8229	0.00		2
			K.VALVGGGIGVAPLYLVAK.N	1753.0947	0.00		3
WP_004454531.1	TerD family protein	TerD			0.99	0.03	23
			K.FSAVGAGFEGGLEALCR.N	1767.8614	0.96		2
			R.QNFGQVSNSYIR.V	1439.7157	1.04		2
			R.RQNFGQVSNSYIR.V	1595.8168	0.99		2
			R.RQNFGQVSNSYIR.V	1595.8168	0.99		3
			R.VLNSENDEEILR.Y	1457.7362	0.98		2
			K.FSAVGAGFEGGLEALCR.N	1767.8614	0.00		3
			R.TGEGDGDDEEILVNLETMPK.H	2218.0392	0.00		2
WP_009890612.1	pyruvate, phosphate dikinase	pyruvate,			0.99	0.00	2
			K.YVYSFGEGSK.D	1191.5812	0.99		2
			K.GANLAEMTK.I	989.5216	0.00		2
WP_009894741.1	hypothetical protein	hypothetical			0.99	0.00	2
			R.YIIGAPLIGQIGK.N	1397.8646	0.99		2
			K.IVYLECEDKPK.L	1476.7898	0.00		3
WP_009903755.1	precorrin-3B C(17)-methyltransferase	precorrin-3B			0.99	0.09	2
			-.MIYVVGIGPGSK.D	1275.7261	1.05		2
			K.AIEDSEAIVGYK.T	1349.7079	0.92		2
WP_009903855.1	16S rRNA (guanine(527)-N(7))-methyltransferase RsmG	16S			0.99	0.00	3
			R.VLELDNITFIHGR.A	1553.8566	0.99		3
WP_011861888.1	D-proline reductase (dithiol) protein PrdB	D-proline			0.99	0.06	234
			K.GVAPMHYAFMGGGGNQHVFTEETGPAIAAK.L	3101.4933	1.06		4
			K.IVPLPYEYK.A	1176.6794	0.91		2
			R.AVAPLVPMGANAGEPHNIEMQTHILR.D	2794.4452	0.93		4
			R.DTLEQLVAIPSAGK.I	1496.845	0.96		2
			R.DTLEQLVAIPSAGK.I	1496.845	1.01		3
			R.FNLAGDTTFR.A	1168.5877	0.97		2
			R.LHELAAEGFIK.G	1282.7285	1.09		3
			R.TAVIVQR.A	813.5072	1.04		2
			K.GVAPM(15.995)HYAFM(15.995)GGGGNQHVFTEETGPAIAAK.L	501.2621	0.00		4
			K.GVAPM(15.995)HYAFMGGGGNQHVFTEETGPAIAAK.L	501.2621	0.00		4
			K.GVAPMHYAFM(15.995)GGGGNQHVFTEETGPAIAAK.L	1150.5304	0.00		4
			K.IVPLPYEYKAHV.-	1483.8439	0.00		3
			R.AIEEAGIPTIIIAALPPVVR.Q	2071.2486	0.00		2
WP_003417352.1	class II fructose-1,6-bisphosphate aldolase	class			1	0.09	23
			K.GVPVDMLR.K	913.5055	1.05		2
			K.YTQPAEAVEFVER.T	1565.7726	1		2
			R.TGVDSLAIAIGTSHGAFK.F	1799.9782	0.87		3
			K.EAVEYAHSK.G	1088.5502	0.00		2
			K.IDDVLGSANSIN.-	1244.6249	0.00		2
			K.YAGPHTLVEMVK.A	1399.7534	0.00		3
			K.YTQPAEAVEFVER.T	1565.7726	0.00		3
			R.DAIQAVVESK.I	1114.6234	0.00		2
			R.ITKEAVEYAHSK.G	1458.8082	0.00		3
WP_003426384.1	response regulator transcription factor	response			1	0.01	2
			K.TGFVACNEIR.E	1193.5863	0.99		2
			K.TTAPILFLTAK.T	1230.7588	1		2
WP_003430074.1	TerD family protein	TerD			1	0.1	23
			K.DLIYFGNLK.S	1137.6434	0.87		2
			K.TTLIVGAIYR.K	1133.6808	1.06		2
			K.TTLIVGAIYRK.D	1289.8071	1		3
			K.EIAKYNLSDNYSEK.T	1756.8883	0.00		3
WP_003430626.1	fructose-6-phosphate aldolase	fructose-6-phosphate			1	0.00	2
			K.AGANYIAPYVNR.L	1335.6935	1		2
			K.ITATAIFTAHQGFLAAK.A	1817.0281	0.00		3
			R.LDNISGDGVAMVSELIK.I	1815.9652	0.00		3
WP_009887863.1	elongation factor Tu	elongation			1	0.15	234
			K.LLDQAQAGDNIGALLR.G	1694.9315	0.94		2
			K.LLDQAQAGDNIGALLR.G	1694.9315	0.92		3
			K.VQDEVELVGLTEAPR.K	1681.8887	1.06		2
			K.VQDEVELVGLTEAPR.K	1681.8887	1.02		3
			R.EHILLSR.Q	894.5287	1.37		2
			R.GITISTAHVEYETPNR.H	1814.9163	0.99		3
			R.HYAHVDCPGHADYVK.N	1824.8447	1.02		4
			R.KLLDQAQAGDNIGALLR.G	1852.0612	0.82		3
			R.KVVVTGVEMFR.K	1319.7635	0.94		3
			R.TVASGVVATIIE.-	1186.6809	1.07		2
			K.TTLTAAITK.T	974.6012	0.00		2
			R.DLLTEYDFPGDDTPIVR.G	1993.9714	0.00		2
			R.GITISTAHVEYETPNR.H	1814.9163	0.00		2
			R.HYAHVDCPGHADYVK.N	1824.8447	0.00		3
WP_009888019.1	anaerobic carbon-monoxide dehydrogenase catalytic subunit	anaerobic			1	0.09	2
			K.CGFGLQGVCCR.L	1340.5788	1.03		2
			K.NLGLKDVECNA.-	1287.6493	0.88		2
			K.SEVFDAIVK.S	1062.5961	1.1		2
			R.GICGADADTIVAR.N	1345.666	0.98		2
			K.SSANQLEEIIIDR.R	1514.794	0.00		2
			K.VADKVINDLYK.S	1360.7966	0.00		2
			R.AVASGAACYLHVVENTAK.N	1916.9859	0.00		2
			R.AVASGAACYLHVVENTAK.N	1916.9859	0.00		3
WP_009888868.1	acetyl-CoA C-acetyltransferase	acetyl-CoA			1	0.17	23
			-.MREVVIASAAR.T	1229.6914	1.17		3
			K.SVSAVELGVTAAK.E	1286.7446	1.05		2
			R.ILTTLLYEMK.R	1279.7462	0.76		2
			R.TAVGSFGGAFK.S	1096.5917	0.96		2
			-.M(15.995)REVVIASAAR.T	177.0824	0.00		3
			K.AQAEGKFDEEIVPVVIK.G	1956.1013	0.00		3
WP_009889331.1	helix-turn-helix transcriptional regulator	helix-turn-helix			1	0.1	2
			K.ILVVSIPNPFEK.S	1410.8486	1.04		2
			R.GLTSVATDSLGK.I	1203.6711	1		2
			R.LIEILPSK.S	967.6318	0.85		2
			K.TNLSIGFLSQLER.G	1504.8249	0.00		2
WP_009903761.1	cobalt-precorrin-8 methylmutase	cobalt-precorrin-8			1	0.08	23
			K.CLVADDETVK.L	1204.6009	0.95		2
			K.IFVLGNAPTALYK.V	1461.8595	0.89		2
			R.SMAAVEIAAK.E	1045.5842	1.06		2
			R.SMAAVEIAAKEEGR.K	1516.7919	1.06		3
			K.CLVADDETVKLAK.E	1544.8484	0.00		2
			K.CLVADDETVKLAK.E	1544.8484	0.00		3
			R.SMAAVEIAAKEEGR.K	1516.7919	0.00		2
WP_009903853.1	GerMN domain-containing protein	GerMN			1	0.14	234
			K.LNSFTTK.D	865.4909	0.88		2
			K.NMNVEQIK.I	1030.5481	1.19		2
			K.SNLGSDAETLMLDSVAR.T	1805.8829	1.13		2
			K.SNLGSDAETLMLDSVAR.T	1805.8829	1.14		3
			K.SNTNVEQPKEENNTEKEVPNNK.A	2654.3229	0.82		3
			K.SNTNVEQPKEENNTEKEVPNNK.A	2654.3229	0.92		4
			K.TGILDVSSDFTK.S	1337.7079	1		2
			K.IDENTLFEELQK.L	1533.7926	0.00		2
			K.LNSFTTKDIDGVK.T	1520.845	0.00		2
			K.SNLGSDAETLM(15.995)LDSVAR.T	1164.5333	0.00		2
			K.SNLGSDAETLM(15.995)LDSVAR.T	1164.5333	0.00		3
WP_003420072.1	NADPH-dependent glutamate synthase	NADPH-dependent			1.01	0.00	2
			K.VAVVGGGNVAMDAAR.T	1413.7398	1.01		2
			K.CVGGCPVGIDIPGFITK.I	1845.9562	0.00		2
			K.VAVIGSGPAGLACAGDLAK.K	1781.971	0.00		2
			K.VAVVGGGNVAM(15.995)DAAR.T	1000.5376	0.00		2
			R.VCPQESQCEGVCILGIK.S	2032.9825	0.00		2
WP_003436675.1	1-(5-phosphoribosyl)-5- 1-(5-phosphoribosyl)-5-	1-(5-phosphoribosyl)-5-			1.01	0.13	23
			-.MIIFPAIDIKDNK.C	1600.9262	0.95		3
			K.AMNLYGAIIGK.A	1205.6842	0.85		2
			K.DGMLQGPNFDIYER.I	1681.777	1.15		2
			K.SLINAGVTR.V	957.5607	1.07		2
			K.AM(15.995)NLYGAIIGK.A	248.1195	0.00		2
			K.ETSLNVIASGGVTSIEDVKR.L	2131.1566	0.00		3
WP_003437060.1	Fe-S-containing hydro-lyase	Fe-S-containing			1.01	0.00	2
			R.MDDLTIPLLER.G	1342.7166	1.01		2
			K.RSDEVIEGMQK.Y	1346.6864	0.00		2
			K.SCEIIAYEDLGAEAIRK.I	1994.0224	0.00		3
			R.M(15.995)DDLTIPLLER.G	177.0824	0.00		2
WP_003438024.1	helix-turn-helix domain-containing protein	helix-turn-helix			1.01	0.00	2
			K.LYPIYPFSPQR.R	1407.7551	1.01		2
			K.TIFHNIEVYR.-	1318.7034	0.00		3
WP_003439113.1	lipoprotein	lipoprotein			1.01	0.14	2
			K.EVTTMITYTK.K	1241.6577	0.82		2
			K.GISDALTEAEYK.Q	1351.6871	1.01		2
			K.VMSEANTLVK.S	1146.6318	1.1		2
			K.EVTTM(15.995)ITYTK.K	607.2887	0.00		2
			K.SYVTDEKNYDKK.E	1600.8348	0.00		3
WP_009901804.1	TIGR04100 family radical SAM protein	TIGR04100			1.01	0.15	2
			K.SFDYMLDFAR.D	1291.5907	1.11		2
			R.INELIDVAK.F	1069.6383	0.9		2
			K.SFDYM(15.995)LDFAR.D	689.2731	0.00		2
			R.INTNGLSDLIHNK.K	1493.8202	0.00		3
			R.INTNGLSDLIHNKK.T	1649.9465	0.00		3
			R.INTNGLSDLIHNKK.T	1649.9465	0.00		4
WP_003421155.1	50S ribosomal protein L14	50S			1.02	0.00	2
			K.IVSLAPEVL.-	967.5954	1.02		2
WP_003422659.1	V-type ATP synthase subunit E	V-type			1.02	0.07	2
			K.EISGAYMEAK.K	1153.5689	1.07		2
			R.DITGGFIVK.K	1004.5906	0.97		2
			K.KQEILEEVILEAK.N	1624.9651	0.00		3
			K.LAEAEAEKAASK.E	1300.7238	0.00		3
			K.SNCTDDSEIVLSK.K	1522.7185	0.00		2
WP_003428379.1	NUDIX hydrolase	NUDIX			1.02	0.14	23
			K.VDTVEIPGQGYQK.R	1488.7824	0.92		2
			R.ELKEETGYSAK.N	1337.7079	1.12		3
			K.VDTVEIPGQGYQKR.E	1644.8835	0.00		3
WP_003428573.1	electron transfer flavoprotein subunit alpha/FixB family pr	electron			1.02	0.00	2
			K.AADPIVVLFGATSIGR.D	1613.9141	1.02		2
			K.VSALLLGSK.V	942.6114	0.00		2
			R.ATIDAGWLDK.A	1144.6128	0.00		2
WP_003428889.1	carboxymuconolactone decarboxylase family protein	carboxymuconolactone			1.02	0.02	2
			K.IGVIGGGSITYPNAR.F	1501.8253	1.04		2
			K.ILEEFNI.-	904.4906	1.01		2
WP_009902280.1	RnfABCDGE type electron transport complex subunit G	RnfABCDGE			1.02	0.09	2
			K.TAEPLEVAK.G	1012.5805	1.09		2
			R.NIQANNELR.K	1098.5782	0.96		2
			K.AKDDAFKGQYK.G	1381.7606	0.00		3
			R.NIQANNELRK.A	1254.7044	0.00		2
			R.NIQANNELRK.A	1254.7044	0.00		3
WP_009903196.1	ribosome-associated translation inhibitor RaiA	ribosome-associated			1.02	0.00	2
			K.AGGYGLIEQD.-	1049.5029	1.02		2
			-.MQIIVSGR.Q	930.5321	0.00		2
			K.LTDGIKGYVDGK.L	1348.7602	0.00		2
			K.YLDPESEVK.V	1134.5809	0.00		2
			K.YLDPESEVKVTVSAK.K	1747.9608	0.00		3
contaminant_KERATIN13	no description	no			1.02	0.26	23
			K.SLNNQFASFIDK.V	1438.7456	1.02		2
			K.SLNNQFASFIDKVR.F	1693.9152	1.62		3
			K.YEELQITAGR.H	1206.6245	1.15		2
			R.FLEQQNQVLQTK.W	1530.8406	0.92		2
			R.GGGGGGYGSGGSSYGSGGGSYGSGGGGGGGR.G	2411.9792	1.02		2
			R.TLLEGEESR.M	1060.5401	1.38		2
			R.TNAENEFVTIK.K	1320.6925	0.91		2
			R.TNAENEFVTIKK.D	1476.8188	0.88		3
			K.DVDGAYM(15.995)TK.V	797.3266	0.00		2
			K.QISNLQQSISDAEQR.G	1743.8751	0.00		2
			K.SKAEAESLYQSK.Y	1423.7559	0.00		2
			K.SKAEAESLYQSK.Y	1423.7559	0.00		3
			R.DYQELMNTK.L	1196.5747	0.00		2
			R.GGGGGGYGSGGSSYGSGGGSYGSGGGGGGGR.G	2411.9792	0.00		3
			R.LRSEIDNVKK.Q	1284.7765	0.00		3
			R.TNAENEFVTIKK.D	1476.8188	0.00		2
WP_003425850.1	F0F1 ATP synthase subunit beta	F0F1			1.03	0.02	2
			K.TALVFGQMNEPPGAR.M	1614.8188	1.04		2
			K.VVDLLAPYLK.G	1185.7373	1		2
			R.QISSLGIYPAVDPLESTSR.I	2061.0823	1.03		2
			K.TALVFGQM(15.995)NEPPGAR.M	893.4681	0.00		2
			K.TVLIQELINNIAK.Q	1523.9287	0.00		2
			R.GM(15.995)EVVDTGGPISVPVGDETLGR.I	234.1038	0.00		2
			R.GMEVVDTGGPISVPVGDETLGR.I	2213.1079	0.00		2
			R.QISSLGIYPAVDPLESTSR.I	2061.0823	0.00		3
			R.TREGNDLYGEMSESGVINK.T	2155.0297	0.00		3
WP_004454888.1	nitroreductase family protein	nitroreductase			1.03	0.16	23
			-.MELQDTIFKR.Q	1335.7221	1.03		3
			K.FKNQDVSDEDILK.M	1633.8563	0.77		3
			K.NQDVSDEDILK.M	1330.6616	1.07		2
WP_009892717.1	GntR family transcriptional regulator	GntR			1.03	0.00	2
			R.TLIETYALEK.M	1235.7013	1.03		2
			K.MMQEEEEVFQQK.L	1610.732	0.00		2
			K.SNLDEILYHK.I	1286.6871	0.00		3
			K.SVELALADLELHK.A	1492.8501	0.00		3
			K.VYVPEYEYDM(15.995)VK.Q	1334.5741	0.00		2
			K.VYVPEYEYDMVK.Q	1589.7687	0.00		2
WP_009897948.1	cell wall-binding cysteine protease Cwp84	cell			1.03	0.07	23
			K.SQGDLIDGLAVGALGAK.T	1639.9145	0.94		2
			K.SQGDLIDGLAVGALGAK.T	1639.9145	1.03		3
			K.TSSGQATSGESLTGADRYETAVK.V	2372.1537	1.07		3
			K.IIDKFYPSSDLK.Y	1508.849	0.00		2
			K.NVQTQLSNM(15.995)GISVER.I	1061.5175	0.00		2
			K.NVQTQLSNMGISVER.I	1702.8672	0.00		2
			K.TDSPVVLVGNKLDESQK.N	1913.0551	0.00		3
			R.VGGNGNENAFNELNTLLGK.-	2017.031	0.00		2
WP_009903837.1	DUF488 domain-containing protein	DUF488			1.03	0.00	2
			R.IVLLGAMQEPIR.C	1366.8006	1.03		2
			K.VAKEDIFLNGIER.L	1558.8719	0.00		3
			R.IVLLGAM(15.995)QEPIR.C	743.4615	0.00		2
			R.TNKDVYTQEGYADFEK.V	1991.9558	0.00		3
WP_003427763.1	(R)-2-hydroxyisocaproyl-CoA dehydratase subunit beta	(R)-2-hydroxyisocaproyl-CoA			1.04	0.00	2
			K.FCDPEEYDYPLVR.K	1729.7658	1.04		2
			R.GSLIVDEVK.K	1014.5961	0.00		2
			R.QWSNIEGCSLAYDPK.K	1822.856	0.00		2
WP_003430702.1	transketolase family protein	transketolase			1.04	9.51	23
			R.AATPDVNSENYKFEIGK.G	1967.0081	1.01		3
			R.GIPNMVVLNPADALEAR.Q	1806.9662	1.07		2
			R.GIPNMVVLNPADALEAR.Q	1806.9662	20		3
			R.NSVAYPNLNVK.I	1273.703	0.85		2
			R.GIPNM(15.995)VVLNPADALEAR.Q	558.2836	0.00		2
WP_003435637.1	trypsin-like peptidase domain-containing protein	trypsin-like			1.04	0.16	2
			K.ASQAEGLGFAIPINTAK.S	1742.9567	0.93		2
			K.TVTQGIISGLDR.T	1286.7194	1.15		2
			K.ASQAEGLGFAIPINTAK.S	1742.9567	0.00		3
			K.GTDVSNYEAATGTK.L	1468.7046	0.00		2
			K.TGLTPAEFADSDKVK.V	1661.8876	0.00		3
			K.VGDTDITGMNDLNK.K	1547.7501	0.00		2
WP_009890262.1	GNAT family N-acetyltransferase	GNAT			1.04	0.11	23
			R.EDAQAFNEIRR.T	1375.6844	1.12		3
			R.NTLALMSDR.V	1047.5383	0.96		2
			K.LGFEIEGTKK.Y	1204.7067	0.00		3
			R.DGKFEDVYIMGR.Y	1484.7334	0.00		3
			R.EDAQAFNEIR.R	1219.5833	0.00		2
WP_009892576.1	NAD(P)/FAD-dependent oxidoreductase	NAD(P)/FAD-dependent			1.04	0.00	2
			R.DGNFVYSVR.N	1083.5349	1.04		2
			K.DIYAAGDVVGK.N	1162.6234	0.00		2
			K.VVQTEDITVNYDK.L	1578.8141	0.00		2
WP_009897329.1	transporter substrate-binding domain-containing protein	transporter			1.04	0.25	23
			K.EINEVIEEMYKDGTLTK.I	2096.0792	0.86		3
			K.VGVGTGAVANEILK.E	1382.8133	1.22		2
			K.DITKEPINE.-	1113.5918	0.00		2
WP_009902143.1	formate C-acetyltransferase	formate			1.04	0.00	2
			K.SGIITGLPDAYGR.G	1346.7194	1.04		2
			K.EQQLDVINR.T	1141.6091	0.00		2
			K.TLLYAINGGVDEK.S	1447.7922	0.00		2
			K.VSIDTSSVQYENDDLM(15.995)R.A	1842.8193	0.00		2
			K.VSIDTSSVQYENDDLMR.A	1999.9238	0.00		2
WP_003426450.1	adenine phosphoribosyltransferase	adenine			1.05	0.1	23
			K.LSNYDVNSLIKY.-	1483.7922	1.08		2
			K.VAIVDDLLATGGTMEAAAK.L	1902.0213	1.05		2
			K.VAIVDDLLATGGTMEAAAK.L	1902.0213	0.9		3
			K.VAIVDDLLATGGTM(15.995)EAAAK.L	1402.7378	0.00		2
			K.VAIVDDLLATGGTM(15.995)EAAAK.L	1402.7378	0.00		3
WP_003438030.1	nitroreductase family protein	nitroreductase			1.05	0.01	3
			K.SDMQVVTDKGSTR.L	1478.7399	1.06		3
			R.ALLDAFHYAR.L	1203.64	1.04		3
WP_009895920.1	GntR family transcriptional regulator	GntR			1.05	0.00	3
			K.MLTYSNNQHIEVVK.S	1730.9025	1.05		3
			K.KIQNGEYEANQR.I	1504.7634	0.00		3
			K.LSNEFHDIYITK.S	1534.8031	0.00		3
WP_003422090.1	proline racemase	proline			1.06	0.34	23
			K.EYLEENLDYLR.T	1483.7195	1.13		2
[truncated: 367 more rows]

## Sheet: MM_BHIS ratios
			Replicate 1 : MM expression compared to BHIS expression
			Accession	description	symbol	sequence	mass	median ratio	standard deviation	charge
			WP_009892314.1	sulfurtransferase-like selenium metabolism protein YedF	sulfurtransferase-like			0.59	0.21	23
						K.GFIYTLTESKPYPK.Y	1727.9579	0.59		3
						K.LSAENEETIENLK.I	1544.7934	0.58		2
						R.GLACPKPVINTK.R	1380.8163	0.95		3
						K.GFIYTLTESKPYPK.Y	1727.9579	0.00		2
						K.YVLLVNGGVK.L	1116.6907	0.00		2
			WP_009903017.1	threonine synthase	threonine			0.59	0.00	3
						K.IIVFFPEDGVSPVQK.L	1730.9688	0.59		3
						K.IIVFFPEDGVSPVQK.L	1730.9688	0.00		2
			WP_003436135.1	zinc metalloprotease Zmp1	zinc			0.66	0.00	2
						K.TWDDVPGLGGSTVALR.I	1670.8628	0.66		2
						K.SACPQTYSFLQNLAK.-	1782.8975	0.00		2
			WP_003437082.1	D-3-phosphoglycerate dehydrogenase	D-3-phosphoglycerate			0.71	0.33	23
						K.TLGLIGFGR.I	960.5757	0.48		2
						R.VSPTPHIGASTVEAQER.I	1805.9272	0.94		3
						R.FINTANVTM(15.995)R.D	1037.5216	0.00		2
						R.GGVGLDNIDVK.Y	1141.6343	0.00		2
						R.VSPTPHIGASTVEAQER.I	1805.9272	0.00		2
			WP_003437535.1	NAD(+) synthase	NAD(+)			0.76	0.00	2
						K.FGDGGVDILPIANLTK.G	1684.94	0.76		2
			WP_009903260.1	HAD family hydrolase	HAD			0.77	0.2	2
						K.FVGIPFIYAK.Y	1209.7162	0.91		2
						K.LFDDIEDTLK.L	1263.6598	0.63		2
						K.LINPIYVGDTQGDANSAK.F	1932.0034	0.00		2
						K.LINPIYVGDTQGDANSAK.F	1932.0034	0.00		3
						R.NKLINPIYVGDTQGDANSAK.F	2202.1726	0.00		3
			WP_003438808.1	4-hydroxy-tetrahydrodipicolinate reductase	4-hydroxy-tetrahydrodipicolinate			0.81	0.17	2
						K.EVLPNVENNYGR.Y	1430.7154	0.69		2
						R.GIFASGSIAAAK.Y	1147.6601	0.93		2
						K.QKPGFYNM(15.995)DSM(15.995)LG.-	1039.5161	0.00		2
						K.VIATGYDGK.M	978.5386	0.00		2
			WP_003417090.1	trigger factor	trigger			0.82	0.00	2
						R.IVIETQYGK.G	1105.6383	0.82		2
						K.VENTVSDENVDAK.L	1474.7151	0.00		2
			WP_009901694.1	nickel pincer cofactor biosynthesis protein LarB	nickel			0.82	0.00	3
						K.IVIATGGTSDIPVADEAYHTAK.F	2285.1984	0.82		3
						K.IQNHDIENIGK.G	1335.7147	0.00		2
						K.IQNHDIENIGK.G	1335.7147	0.00		3
						R.IYDVGVAGIHR.L	1226.6772	0.00		3
			WP_009903233.1	alanine--glyoxylate aminotransferase family protein	alanine--glyoxylate			0.82	0.05	23
						K.AISAPAGLTIVGISQDAK.N	1767.0142	0.85		2
						K.AISAPAGLTIVGISQDAK.N	1767.0142	0.78		3
						K.INYAPGPTETRENVR.L	1743.8904	0.00		3
			WP_003422320.1	ferredoxin	ferredoxin			0.83	0.00	2
						K.EAEEGCPVSAITVK.-	1544.7756	0.83		2
			WP_003436669.1	bifunctional phosphoribosyl-AMP cyclohydrolase/phosphoribosyl-A	bifunctional			0.83	0.1	23
						K.KVGEESSEVIIASK.N	1558.8818	0.9		3
						K.VGEESSEVIIASK.N	1402.7555	0.76		2
						-.MDNKCNNVYSDEVEK.F	1927.8656	0.00		2
						-.MDNKCNNVYSDEVEK.F	1927.8656	0.00		3
						K.CNNVYSDEVEK.F	1411.629	0.00		2
						K.KVGEESSEVIIASK.N	1558.8818	0.00		2
						K.NNPVEGSYTNYLFEK.G	1830.8869	0.00		2
						R.SRQELWVKGETSGNTQK.V	2032.0783	0.00		3
						R.SRQELWVKGETSGNTQK.V	2032.0783	0.00		4
			WP_009891694.1	TSUP family transporter	TSUP			0.83	0.00	3
						K.EGKLEEQSTPK.V	1328.7188	0.83		3
						K.FIKEDAYTK.K	1197.6645	0.00		3
						K.FIKEDAYTKK.A	1353.7908	0.00		3
						K.VAVTGFITDFFDTLGIGSFAPTIAM(15.995)SK.A	2619.3376	0.00		3
			WP_003416187.1	5-methylthioadenosine/adenosylhomocysteine nucleosidase	5-methylthioadenosine/adenosylhomocysteine			0.84	0.01	23
						K.ASLEFYK.G	912.4957	0.85		2
						R.VVTGDKFINSK.E	1290.7547	0.83		3
			WP_003428442.1	3-oxoacyl- 3-oxoacyl-	3-oxoacyl-			0.84	0.13	23
						K.AGVIGFTK.A	847.5167	0.95		2
						K.AVTKPMMK.K	988.5813	0.57		2
						K.IDILVNNAGITK.D	1325.7919	0.88		2
						K.VLSDDVKESTLANIPK.K	1812.0244	0.71		2
						K.VLSDDVKESTLANIPK.K	1812.0244	0.89		3
						R.NININAVAPGFIETDMTK.V	2004.0431	0.84		2
						R.NININAVAPGFIETDMTK.V	2004.0431	0.79		3
						-.M(15.995)INLTGQVAVVTGGSR.G	177.0824	0.00		2
						K.TKNEIESMGVK.C	1318.7166	0.00		3
						R.IINM(15.995)TSVVGIM(15.995)GNAGQTNYCASK.A	517.2934	0.00		3
						R.IINM(15.995)TSVVGIMGNAGQTNYCASK.A	517.2934	0.00		3
						R.NININAVAPGFIETDM(15.995)TK.V	1745.8658	0.00		2
						R.NININAVAPGFIETDM(15.995)TK.V	1745.8658	0.00		3
			WP_003421125.1	30S ribosomal protein S13	30S			0.85	0.19	23
						K.AEINPDTR.I	942.4771	1.02		2
						K.ATANEILAK.A	985.5808	0.95		2
						R.IAGVDLPR.E	867.5178	0.61		2
						R.IKDLSEDQVNELR.K	1613.8625	0.75		3
			WP_003439494.1	TerD family protein	TerD			0.85	0.16	23
						K.VTVLAGEIYR.R	1147.6601	0.81		2
						K.YNLQEDFSGK.V	1255.6085	0.71		2
						R.DQDFGQMNNSFIR.L	1598.7147	1.01		2
						R.GDLVYFGNLK.H	1180.6492	1.12		2
						R.LIDSNSKQELFK.Y	1504.8501	0.85		3
						K.KRDQDFGQMNNSFIR.L	1911.9455	0.00		3
						K.NLVVGLGWDM(15.995)NK.L	1130.5794	0.00		2
						K.NYDLDAFAIALTNQDK.M	1867.9397	0.00		2
						R.DQDFGQM(15.995)NNSFIR.L	867.3433	0.00		2
						R.GDLVYFGNLKHPSK.A	1657.9192	0.00		4
						R.LIDSNSKQELFK.Y	1504.8501	0.00		2
						R.VSLVKDNNPVK.N	1295.7813	0.00		2
			WP_003432207.1	transporter substrate-binding domain-containing protein	transporter			0.86	0.06	2
						K.IEEFLNEASTEAASN.-	1651.7577	0.81		2
						K.KIEEFLNEASTEAASN.-	1807.884	0.9		2
						R.VGVQAGSIQEEYVVNTLK.M	1990.0816	0.00		2
						R.VGVQAGSIQEEYVVNTLK.M	1990.0816	0.00		3
			WP_003436400.1	FAD-dependent oxidoreductase	FAD-dependent			0.86	0.02	23
						K.VVASETAIK.Y	972.5856	0.86		2
						R.LGVAVDGIEGDGK.A	1284.6925	0.88		2
						R.LGVAVDGIEGDGKAQK.V	1639.9145	0.84		3
						K.IKDLDIDTVCPGHGPVLTENPR.K	2502.2982	0.00		4
						K.VFSIGNIQNFDKEISSKDEGQR.I	2595.3374	0.00		4
						R.ANTQMVQDTSVK.I	1376.697	0.00		2
			WP_004454825.1	recombination regulator RecX	recombination			0.86	0.00	2
						K.IVNTNVNLNK.C	1183.6925	0.86		2
						K.ALNILSHADQSEK.K	1480.7886	0.00		3
						K.SYNLVNDSVLAQK.I	1505.809	0.00		2
			WP_003419930.1	NADH peroxidase	NADH			0.87	0.08	2345
						K.AFLGLLNR.Y	930.5651	0.99		2
						K.AKELGLDAIHDTVHEMCKDEAR.H	2622.2975	0.8		4
						K.AKELGLDAIHDTVHEMCKDEAR.H	2622.2975	0.83		5
						K.ELGLDAIHDTVHEMCKDEAR.H	2395.1341	0.82		3
						K.ELGLDAIHDTVHEMCKDEAR.H	2395.1341	0.88		4
						K.ELGLDAIHDTVHEMCKDEAR.H	2395.1341	1.02		5
						K.FAELLGEVVVADTKENLR.V	2059.1395	0.7		2
						K.FVCTVCGYIHEGDAAPAQCPVCK.V	2695.2096	0.83		3
						K.NWADEHR.I	954.4308	0.96		2
						K.RIALEEAEHAAK.F	1392.7725	0.88		3
						R.IALEEAEHAAK.F	1236.6714	0.8		2
						R.IALEEAEHAAK.F	1236.6714	0.87		3
						R.IGVAQGVDEEIIEGLR.A	1724.9309	0.97		2
						R.IGVAQGVDEEIIEGLR.A	1724.9309	0.97		3
						R.QADREGYPEVGEAYK.R	1766.8475	0.98		3
						R.QADREGYPEVGEAYKR.I	1923.952	0.87		3
						R.QADREGYPEVGEAYKR.I	1923.952	0.94		4
						R.VDAEYGATDGK.L	1180.5612	0.86		2
						R.VDAEYGATDGKLK.L	1449.7715	0.78		3
						R.VRVDAEYGATDGK.L	1435.7307	0.85		2
						R.VRVDAEYGATDGK.L	1435.7307	0.87		3
						R.VRVDAEYGATDGKLK.L	1704.941	0.87		2
						R.VRVDAEYGATDGKLK.L	1704.941	0.88		3
						R.VRVDAEYGATDGKLK.L	1704.941	0.9		4
						K.AKELGLDAIHDTVHEMCKDEAR.H	2622.2975	0.00		6
						K.ELGLDAIHDTVHEM(15.995)CKDEAR.H	1606.7661	0.00		3
						K.ELGLDAIHDTVHEM(15.995)CKDEAR.H	1606.7661	0.00		5
						K.FAELLGEVVVADTK.E	1545.8654	0.00		3
						K.FAELLGEVVVADTKENLR.V	2059.1395	0.00		3
						K.FVCTVCGYIHEGDAAPAQCPVCK.V	2695.2096	0.00		2
						K.FVCTVCGYIHEGDAAPAQCPVCK.V	2695.2096	0.00		4
						K.VGADKFEEMKGEK.N	1578.8327	0.00		3
						R.ANFVGECTEVGM(15.995)YLAM(15.995)SR.Q	1340.5741	0.00		2
						R.ANFVGECTEVGM(15.995)YLAM(15.995)SR.Q	1340.5741	0.00		3
						R.ANFVGECTEVGM(15.995)YLAMSR.Q	1340.5741	0.00		2
						R.ANFVGECTEVGMYLAM(15.995)SR.Q	1818.7991	0.00		2
						R.QADREGYPEVGEAYK.R	1766.8475	0.00		2
						R.QADREGYPEVGEAYKR.I	1923.952	0.00		2
						R.VDAEYGATDGKLK.L	1449.7715	0.00		2
			WP_003420885.1	orotate phosphoribosyltransferase	orotate			0.87	0.15	23
						K.EAVFTER.K	878.4498	0.99		2
						K.EGKLPVVKPGSR.E	1349.8395	0.86		3
						K.IIIAEDVVTTGK.S	1313.7806	0.87		2
						R.EFKELGM.-	908.4677	0.88		2
						R.VLEALGGEVVGVACIADR.T	1854.9873	0.87		2
						R.VLEALGGEVVGVACIADR.T	1854.9873	0.55		3
						K.LDIQVYESDECPLCK.E	1924.8992	0.00		2
						R.QLGKEAVFTERK.D	1488.8664	0.00		3
			WP_009889030.1	16S rRNA processing protein RimM	16S			0.87	0.17	23
						K.FVPTIDIDER.K	1231.6449	0.91		2
						K.FVPTIDIDERK.M	1387.7711	0.85		3
						K.MIIDPIKGMID.-	1300.7135	0.54		2
						K.VGQIVNTQGLKGEVR.V	1652.9574	0.89		3
						K.VGQIVNTQGLK.G	1211.7238	0.00		2
						K.VGQIVNTQGLKGEVR.V	1652.9574	0.00		2
			WP_009889371.1	NADH peroxidase	NADH			0.87	0.08	2345
						K.AFLGLLNR.H	930.5651	0.99		2
						K.ELGLDAIHDTVHEMCKDEAR.H	2395.1341	0.82		3
						K.ELGLDAIHDTVHEMCKDEAR.H	2395.1341	0.88		4
						K.ELGLDAIHDTVHEMCKDEAR.H	2395.1341	1.02		5
						K.FAELLGEVVVADTKENLR.V	2059.1395	0.7		2
						K.FVCTVCGYIHEGDAAPAQCPVCK.V	2695.2096	0.83		3
						K.VGADKFEEMKGEMVWADEHR.I	2448.1647	0.77		4
						K.VGADKFEEMKGEMVWADEHR.I	2448.1647	0.73		5
						R.AKELGLDAIHDTVHEMCKDEAR.H	2622.2975	0.8		4
						R.AKELGLDAIHDTVHEMCKDEAR.H	2622.2975	0.83		5
						R.IAFEEAEHAAK.F	1270.6558	0.88		2
						R.IAFEEAEHAAK.F	1270.6558	0.87		3
						R.IGVAQGVDAEIIEGLR.A	1666.9254	0.96		2
						R.IGVAQGVDAEIIEGLR.A	1666.9254	0.92		3
						R.QADREGYPEVAEAYK.R	1780.8632	0.94		3
						R.QADREGYPEVAEAYKR.I	1937.9677	0.89		3
						R.QADREGYPEVAEAYKR.I	1937.9677	0.91		4
						R.VDAEYGATDGK.L	1180.5612	0.86		2
						R.VDAEYGATDGKLK.L	1449.7715	0.78		3
						R.VRVDAEYGATDGK.L	1435.7307	0.85		2
						R.VRVDAEYGATDGK.L	1435.7307	0.87		3
						R.VRVDAEYGATDGKLK.L	1704.941	0.87		2
						R.VRVDAEYGATDGKLK.L	1704.941	0.88		3
						R.VRVDAEYGATDGKLK.L	1704.941	0.9		4
						K.ELGLDAIHDTVHEM(15.995)CKDEAR.H	1606.7661	0.00		3
						K.ELGLDAIHDTVHEM(15.995)CKDEAR.H	1606.7661	0.00		5
						K.FAELLGEVVVADTK.E	1545.8654	0.00		3
						K.FAELLGEVVVADTKENLR.V	2059.1395	0.00		3
						K.FVCTVCGYIHEGDAAPAQCPVCK.V	2695.2096	0.00		2
						K.FVCTVCGYIHEGDAAPAQCPVCK.V	2695.2096	0.00		4
						K.VGADKFEEMKGEMVWADEHR.I	2448.1647	0.00		3
						R.AKELGLDAIHDTVHEMCKDEAR.H	2622.2975	0.00		6
						R.ANFTGECTEVGM(15.995)YLAM(15.995)SR.Q	1342.5533	0.00		2
						R.ANFTGECTEVGM(15.995)YLAM(15.995)SR.Q	1342.5533	0.00		3
						R.ANFTGECTEVGM(15.995)YLAMSR.Q	1342.5533	0.00		2
						R.ANFTGECTEVGMYLAM(15.995)SR.Q	1820.7783	0.00		2
						R.ANFTGECTEVGMYLAM(15.995)SR.Q	1820.7783	0.00		3
						R.EGYPEVAEAYKR.I	1466.7405	0.00		3
						R.QADREGYPEVAEAYKR.I	1937.9677	0.00		2
						R.VDAEYGATDGKLK.L	1449.7715	0.00		2
			WP_003418897.1	3-hydroxybutyryl-CoA dehydrogenase	3-hydroxybutyryl-CoA			0.88	0.08	23
						K.LVEVISGQLTSK.V	1328.7915	0.83		2
						K.SINKVPVDVSESPGFVVNR.I	2099.1456	0.94		3
			WP_003420966.1	phosphoribosylaminoimidazolesuccinocarboxamide synthase	phosphoribosylaminoimidazolesuccinocarboxamide			0.88	0.00	3
						K.KVEILPLEVIVR.N	1462.9487	0.88		3
						K.DLGDLVEGYTEVLSR.M	1692.857	0.00		2
						R.NIAAGSICK.R	988.5376	0.00		2
			WP_003429162.1	orotidine-5-phosphate decarboxylase	orotidine-5-phosphate			0.88	0.1	23
						K.FHDIPNTMK.S	1157.5903	0.88		2
						K.LIVAIDTDEFDKAK.E	1660.9287	0.85		3
						K.VGLEQYVATK.G	1162.6598	0.87		2
						R.ESAINIVR.E	928.5342	1.08		2
						R.QCALIAR.E	858.4746	1.02		2
						R.QCALIAREEAER.L	1472.7406	1.02		3
						R.VVTPSDAIK.K	984.5856	0.85		2
						R.VVTPSDAIKK.G	1140.7118	0.84		2
						K.AENPRESAINIVR.E	1495.8107	0.00		3
						K.ESGIDGVVCSAQEVDK.I	1747.8298	0.00		2
						K.GKTIDYLKEK.G	1305.7908	0.00		3
						K.RVVTPSDAIKK.G	1296.8129	0.00		3
			WP_003434107.1	MetQ/NlpA family ABC transporter substrate-binding protein	MetQ/NlpA			0.88	0.05	23
						K.EMNAEQLPTVLK.D	1427.7694	0.88		2
						K.FIQDEYKGSIVPAF.-	1668.8763	0.87		2
						K.ILEVAKPLLK.E	1206.8315	0.96		3
						K.ILVGASSNPHAK.I	1248.719	0.85		2
						K.ILVGASSNPHAK.I	1248.719	0.8		3
						K.VHIEPMGFYSEK.V	1491.7432	0.89		3
						K.SLDELKDGAVIAVPNDATNGAR.A	2282.1948	0.00		3
						K.VHIEPM(15.995)GFYSEK.V	752.3891	0.00		3
			WP_004454497.1	sugar O-acetyltransferase	sugar			0.88	0.02	2
						K.DIPSNMIAYGNPCR.I	1634.7545	0.89		2
						K.ILNELLGGK.G	1011.6328	0.86		2
			WP_009888867.1	electron transfer flavoprotein subunit beta/FixA family pro	electron			0.88	0.06	23
						K.DIEVDPSNLGLK.G	1354.7344	0.81		2
						K.GSPTSVFK.S	877.4909	0.96		2
						K.SVKPAGTIYNEDAK.T	1575.8508	0.91		2
						K.SVKPAGTIYNEDAK.T	1575.8508	0.92		3
						R.AFAGADTWATSSALAGALK.N	1864.9764	0.85		2
						R.QFEDCCHDLK.V	1406.5959	0.8		3
						K.QVPDTTEVKLDPNTGTLIR.D	2153.1773	0.00		3
						K.RQFEDCCHDLK.V	1562.697	0.00		3
						K.TSAGIIIDKLK.E	1241.7959	0.00		3
						R.AFAGADTWATSSALAGALK.N	1864.9764	0.00		3
			WP_009903754.1	porphobilinogen synthase	porphobilinogen			0.88	0.00	2
						K.AGADMVAPSDMMDGR.I	1550.6527	0.88		2
			WP_011860916.1	translation initiation factor IF-3	translation			0.88	0.05	23
						K.APAFEGNNMVVIIDPKK.-	1927.0682	0.83		3
						K.NLDLVQISPNANPPVCK.I	1935.0329	0.91		2
						K.NLDLVQISPNANPPVCK.I	1935.0329	0.93		3
						R.LRPGIEQNDLNTK.A	1552.8573	0.93		2
						R.LRPGIEQNDLNTK.A	1552.8573	0.93		3
						R.VLSPTGEQLGVMPTK.E	1611.8906	0.85		2
						R.VLSPTGEQLGVMPTK.E	1611.8906	0.82		3
						R.VLSPTGEQLGVMPTKEAQAMANSK.N	2571.3482	0.82		3
						K.APAFEGNNMVVIIDPK.K	1769.9386	0.00		2
						K.FLDIIKEFGEPTK.A	1619.9174	0.00		3
						R.VLSPTGEQLGVM(15.995)PTK.E	1257.6639	0.00		2
						R.VLSPTGEQLGVM(15.995)PTK.E	1257.6639	0.00		3
						R.VLSPTGEQLGVM(15.995)PTKEAQAM(15.995)ANSK.N	1257.6639	0.00		3
						R.VLSPTGEQLGVM(15.995)PTKEAQAMANSK.N	1257.6639	0.00		3
						R.VLSPTGEQLGVMPTKEAQAM(15.995)ANSK.N	2143.1098	0.00		3
			WP_003420711.1	2-oxoacid:acceptor oxidoreductase family protein	2-oxoacid:acceptor			0.89	0.28	23
						K.EKFVPLNR.E	1057.6284	0.57		2
						K.EVSWLPSYGPEMR.G	1577.7548	0.97		2
						K.FKDDVIPGGK.I	1158.6649	0.91		2
						K.GMDATCSK.A	924.4045	0.22		2
						K.IIVNSSLIK.E	1041.6798	0.89		2
						K.IIVNSSLIKEK.V	1326.8486	0.89		3
						K.VSDTVDIESVLEAFKK.V	1864.0275	1		3
						K.EVSWLPSYGPEM(15.995)R.G	1421.6537	0.00		2
						K.EVSWLPSYGPEM(15.995)R.G	1421.6537	0.00		3
			WP_003424711.1	sporulation transcription factor Spo0A	sporulation			0.89	0.04	23
						K.DGIEALDLVK.K	1127.6438	0.89		2
						K.ELYPSIAK.K	975.5641	0.82		2
						R.GKVDTINQLFGYTVHNTK.G	2119.1507	0.89		3
						K.DGIEALDLVKK.T	1283.7701	0.00		3
						K.IIVLSAVGQDK.I	1197.7333	0.00		2
						R.HAIEVAWSR.G	1095.5825	0.00		2
			WP_003425856.1	F0F1 ATP synthase subunit delta	F0F1			0.89	0.12	2
						-.MINVIANR.Y	957.543	1.09		2
						K.NVTIENVVDK.T	1185.6605	0.88		2
						R.IGNEQIDGTVK.T	1228.6663	0.89		2
			WP_009890640.1	DUF4342 domain-containing protein	DUF4342			0.89	0.04	2
						K.NMITNAAK.D	917.5004	0.92		2
						R.VPGATYAEAK.E	1061.5757	0.86		2
						K.DVKDVVVDKK.E	1255.7751	0.00		3
						K.VQNEEDGEIVDLGELNEEK.L	2215.0573	0.00		2
						M.SSNITIEM(15.995)VDSVFER.V	921.4477	0.00		2
			WP_009902469.1	cysteine hydrolase	cysteine			0.89	13.51	23
						R.VIAFTDSHTPK.S	1270.6921	20		2
						R.VIAFTDSHTPK.S	1270.6921	0.89		3
						K.SYFNQHNIEK.N	1334.6619	0.00		2
						R.QGALYSPR.V	918.4923	0.00		2
			WP_003417965.1	helix-turn-helix transcriptional regulator	helix-turn-helix			0.9	0.01	23
						K.QLSQLLEEPHAK.I	1447.8035	0.91		3
						K.VGILELVEEK.I	1183.7064	0.9		2
						K.QLSQLLEEPHAK.I	1447.8035	0.00		2
			WP_003421190.1	transcription termination/antitermination factor NusG	transcription			0.9	0.11	23
						K.AMGIDTTDPK.V	1103.5533	0.9		2
						K.GVTGFVGPGSKPVPLSEDEVK.A	2183.1919	0.99		3
						K.VYPSYVLVK.M	1122.6689	0.87		2
						R.GMEDCIR.Q	907.3892	0.92		2
						R.KVYPSYVLVK.M	1278.7951	0.72		2
						R.QVVVPTEEVVETTK.T	1612.8924	0.91		2
						R.TLFVIELEGIEKI.-	1558.9222	0.7		2
						K.MIITDESWYVVR.N	1538.7803	0.00		2
						R.KVYPSYVLVK.M	1278.7951	0.00		3
			WP_003425980.1	type III pantothenate kinase	type			0.9	0.08	23
						K.ISSEALFQSASK.L	1322.7082	0.93		2
						K.KQPLIVGPGIK.T	1232.822	0.89		3
						K.QPLIVGPGIK.T	1076.6958	1.07		2
						K.VIATGGLAK.L	884.5695	0.85		2
						R.VELAKPGMTICK.S	1429.8037	0.9		3
						K.ELNCDDVK.V	1047.4907	0.00		2
						K.ISSEALFQSASKLPR.V	1688.9461	0.00		3
			WP_003429190.1	ATP-binding cassette domain-containing protein	ATP-binding			0.9	0.18	23
						K.GIGYAFQQPPR.I	1260.6615	1		2
						K.KGIGYAFQQPPR.I	1416.7878	0.61		3
						K.RIEIATLFAR.D	1216.7292	0.97		3
						R.IEIATLFAR.D	1060.6281	0.84		2
						K.LIVITGPNGGGK.S	1180.718	0.00		2
						K.RIEIATLFAR.D	1216.7292	0.00		2
			WP_003430597.1	UMP kinase	UMP			0.9	0.16	23
						K.KFTELSYMEVIQK.E	1698.9266	0.61		3
						K.LSGEALAGER.G	1029.5455	1.04		2
						K.VFELTTENIIR.A	1361.7555	0.99		2
						R.AVKGENIGTTVK.-	1299.7762	0.79		2
						R.AVKGENIGTTVK.-	1299.7762	0.83		3
						R.VQTAIDMR.Q	960.5063	0.98		2
						K.VM(15.995)DSTATSLCM(15.995)DNKIPIK.V	276.1508	0.00		3
						K.VMDSTATSLCM(15.995)DNKIPIK.V	1242.5294	0.00		3
						R.AAEM(15.995)EAEVILLAK.N	448.1992	0.00		2
						R.AAEM(15.995)EAEVILLAK.N	448.1992	0.00		3
			WP_003438086.1	FadR family transcriptional regulator	FadR			0.9	0.00	2
						R.VLETMGVIESR.Q	1260.6748	0.9		2
						R.QGEGNFICTNIEK.T	1564.7555	0.00		2
			WP_004454488.1	flavodoxin family protein	flavodoxin			0.9	0.12	2
						K.LGASVVSCR.R	975.5172	0.98		2
						R.TLGENMAWLLK.C	1330.7319	0.81		2
						K.ETIPGCISCASCFETGK.C	1972.8774	0.00		2
						K.VLLINGSPNQYGCTYTALNEITK.V	2625.3554	0.00		3
			WP_009888223.1	2-hydroxyisocaproyl-CoA dehydratase activator HadI	2-hydroxyisocaproyl-CoA			0.9	0.11	2
						R.GVNFIIPETR.T	1172.6554	0.98		2
						R.TIIDIGGQDAK.V	1185.6605	0.82		2
						K.NGEDIVASETISSGTGTTGPSR.V	2164.0325	0.00		2
			WP_009897960.1	S-layer protein SlpA	S-layer			0.9	2.98	234
						A.DDTKVETGDQGYTVVQSK.Y	2054.0249	0.83		3
						K.AGETTYSTGLTFEDGSTEK.I	2049.946	0.92		2
						K.AGETTYSTGLTFEDGSTEK.I	2049.946	0.91		3
						K.ALKLTVVPGSK.A	1195.7904	20		3
						K.APLLLTSK.D	897.5899	0.87		2
						K.ASIADENSPVK.L	1185.6241	0.9		2
						K.ASIADENSPVKLTLK.S	1668.9662	1.1		2
						K.ASIADENSPVKLTLK.S	1668.9662	0.89		3
						K.DLKDYVDDLR.T	1306.6769	0.93		2
						K.DLKDYVDDLR.T	1306.6769	0.94		3
						K.ESSYYQDNLNNDKK.V	1800.853	0.96		3
						K.EVENELKDMGLK.V	1487.7905	0.88		2
						K.EVENELKDMGLK.V	1487.7905	0.91		3
						K.FAEKTPSASVQPVITK.L	1787.0274	0.85		3
						K.GIATSVINK.L	957.5859	0.9		2
						K.GILDGSITEIK.V	1200.6966	0.94		2
						K.IADEVGLDNDK.A	1243.6296	1.17		2
						K.KAPLLLTSK.D	1053.7162	0.86		2
						K.KVYLAGGVNSISK.E	1418.8497	0.82		2
						K.KVYLAGGVNSISK.E	1418.8497	0.9		3
						K.LAMSAIFDTAYTDSSETAVK.I	2177.0643	0.89		3
						K.LGDSDIIDITK.A	1244.6864	0.96		2
						K.LTVVPGSK.A	855.543	0.86		2
						K.MDLADGDATPIVVVDGK.A	1770.9074	0.93		2
						K.STTGINTSK.K	963.5237	1.02		2
						K.TDLNTLYK.V	1022.5648	0.91		2
						K.TPSASVQPVITK.L	1282.7497	0.93		2
						K.VGSELNAADASK.L	1216.6299	0.85		2
						K.VIKESSYYQDNLNNDKK.V	2170.1351	0.81		4
						K.VLDKDNGENLVQVGK.G	1710.9516	0.82		3
						K.VLNGDEADTNGLIEEVSGK.Y	2016.0092	0.9		2
						K.VLNGDEADTNGLIEEVSGK.Y	2016.0092	0.96		3
						K.VLTGSDNDKNK.L	1273.6878	0.85		3
						K.VVNFFVAK.D	978.5902	0.95		2
						K.VYLAGGVNSISK.E	1262.7234	0.85		2
						K.YQVVLYPEGKR.V	1406.7922	0.86		3
						K.YYNSDDENAIFR.D	1533.6736	1.03		2
						M.DLADGDATPIVVVDGK.A	1639.8669	0.84		2
						R.IINAKEETIDIDASSSK.T	1918.034	0.89		2
						R.IINAKEETIDIDASSSK.T	1918.034	0.88		3
						R.LAGDDRYETSLK.I	1422.7355	0.86		2
						A.DDTKVETGDQGYTVVQSK.Y	2054.0249	0.00		2
						A.DGDATPIVVVDGK.A	1340.7188	0.00		2
						I.IAGTSSADGVVTNTGAASGSTETNSAGTK.L	2668.2869	0.00		3
						K.ADMNDTKFGK.A	1209.6064	0.00		3
						K.AGETTYSTGLTFEDGSTEKIVK.L	2418.2247	0.00		3
						K.AVEQLQK.G	870.5175	0.00		2
						K.DLTGASADAIIAGTSSADGVVTNTGAASGSTETNSAGTK.L	3582.7214	0.00		3
						K.DVENAIDDATGK.S	1302.6303	0.00		2
						K.EETIDIDASSSK.T	1349.6562	0.00		2
						K.ESSYYQDNLNNDK.K	1644.7268	0.00		2
						K.ESSYYQDNLNNDKK.V	1800.853	0.00		2
						K.EVENELKDM(15.995)GLK.V	1161.5587	0.00		2
						K.FAEKTPSASVQPVITK.L	1787.0274	0.00		2
						K.IADEVGLDNDKAFVVGGTG.L	1932.9874	0.00		2
						K.LAM(15.995)SAIFDTAYTDSSETAVK.I	361.2035	0.00		2
						K.LAM(15.995)SAIFDTAYTDSSETAVK.I	361.2035	0.00		3
						K.LAMSAIFDTAYTDSSETAVK.I	2177.0643	0.00		2
						K.M(15.995)DLADGDATPIVVVDGK.A	177.0824	0.00		2
						K.VETGDQGYTVVQSK.Y	1565.7937	0.00		2
						K.VIKESSYYQDNLNNDK.K	2014.0088	0.00		3
						K.VIKESSYYQDNLNNDKK.V	2170.1351	0.00		3
						K.VLDKDNGENLVQVGK.G	1710.9516	0.00		2
						K.YQVVLYPEGKR.V	1406.7922	0.00		2
						R.NANGKM(15.995)DLADGDATPIVVVDGK.A	689.353	0.00		3
						R.NANGKMDLADGDATPIVVVDGK.A	2284.1814	0.00		3
						R.TYNNGYSNAIEVAGEDR.I	1899.8599	0.00		2
			WP_009901573.1	adenylate kinase	adenylate			0.9	0.08	234
						K.GTQAAGIVEK.Y	1028.5866	0.9		2
						K.IEGVCDVCQGELYQR.A	1852.8448	0.96		2
						K.VVNIEVDK.S	970.5699	0.83		2
						K.YNIPHISTGDIFR.K	1559.8096	0.96		3
						K.YNIPHISTGDIFRK.N	1715.9359	1.09		3
						K.YNIPHISTGDIFRK.N	1715.9359	1.02		4
						R.IILLGPPGAGK.G	1090.7114	0.89		2
						R.IQVYLDETKPLVDYYSK.Q	2158.1643	0.84		3
						R.NVAQGEHLDIFLK.N	1538.8457	0.9		3
						K.NAGISLDK.V	872.4967	0.00		2
						K.NIKEGTELGK.K	1171.6812	0.00		2
						K.NIKEGTELGKK.A	1327.8075	0.00		3
						R.IILLGPPGAGKGTQAAGIVEK.Y	2074.2595	0.00		3
						R.ISQEDCKNGFMLDGFPR.N	2069.9744	0.00		3
			WP_011861621.1	peptidoglycan editing factor PgeF	peptidoglycan			0.9	0.00	2
						R.IGTVLQIK.-	926.6165	0.9		2
						K.ENIINLNLCTSCR.A	1633.7916	0.00		2
						R.DGDALITNLEK.V	1243.666	0.00		2
			WP_032507408.1	diphthine--ammonia ligase	diphthine--ammonia			0.9	0.00	2
						K.DGYGYLEIK.-	1112.5754	0.9		2
						K.HLGEEFLGK.K	1084.5917	0.00		2
			WP_003416023.1	phosphate propanoyltransferase	phosphate			0.91	0.11	234
						-.MKLPIALSNK.H	1197.7519	1.06		3
						K.APIKESGDIAGTPGVK.L	1622.9243	0.87		2
						K.APIKESGDIAGTPGVK.L	1622.9243	0.9		3
						K.EGVIVASR.H	857.4971	0.99		2
						K.ESGDIAGTPGVK.L	1185.6241	0.89		2
						K.FKPLSQPGQYACEEK.V	1865.9427	0.96		3
						K.FKPLSQPGQYACEEKVDLVGPK.G	2602.391	0.75		3
						K.FKPLSQPGQYACEEKVDLVGPK.G	2602.391	0.68		4
						K.LVGPAGEVEMK.E	1184.6475	0.92		2
						K.LVGPAGEVEMKEGVIVASR.H	1997.1061	0.84		3
						K.NGDLVELIVD.-	1113.5918	1.03		2
						R.ALVFENVLVR.A	1186.7074	0.97		2
						-.M(15.995)KLPIALSNK.H	177.0824	0.00		3
						-.MKLPIALSNK.H	1197.7519	0.00		2
						K.FGVTDKQIVK.V	1217.7384	0.00		2
						K.LVGPAGEVEM(15.995)KEGVIVASR.H	1028.5212	0.00		3
						R.ASDSFNLEM(15.995)HVDM(15.995)EEGNAAGVK.N	1040.4485	0.00		3
						R.ASDSFNLEM(15.995)HVDMEEGNAAGVK.N	1040.4485	0.00		3
						R.HIHM(15.995)SNEDAAK.F	564.2842	0.00		3
						R.HIHMSNEDAAK.F	1307.6292	0.00		2
						R.HIHMSNEDAAK.F	1307.6292	0.00		3
			WP_003424537.1	30S ribosomal protein S2	30S			0.91	0.09	23
						K.LITGAMATAVIEGR.Q	1429.7963	0.91		2
						R.CGMYFVNER.W	1202.5213	1.04		2
						R.KENIAIQEAHR.L	1363.7572	0.86		3
						K.QLLEAGVHFGHQTR.R	1619.8532	0.00		4
						R.NGIYIIDLQK.T	1231.7176	0.00		2
						R.WLGGMLTNHK.T	1211.6485	0.00		3
			WP_003427766.1	isocaprenoyl-CoA:2-hydroxyisocaproate CoA-transferase HadA	isocaprenoyl-CoA:2-hydroxyisocaproate			0.91	0.08	23
						K.LLSEADIFVTNVR.V	1503.8297	0.87		2
						K.SKEGVEILHK.L	1222.7285	1.04		3
						K.VGQHTVEVLK.S	1164.6867	0.81		2
						K.VVELSSFIAAPCCAK.M	1706.8736	0.91		2
						R.ENPNSPLMTTYK.C	1449.7174	0.94		2
						R.GGVSQSVMEK.G	1076.5536	0.91		2
						K.LLSEADIFVTNVR.V	1503.8297	0.00		3
						K.SPASDDENPM(15.995)FELENGNKK.G	1089.4285	0.00		3
						K.SPASDDENPMFELENGNK.K	2049.9031	0.00		2
						K.SPASDDENPMFELENGNKK.G	2206.0293	0.00		3
						K.TYDSGNTGVLVNTPVM(15.995)FR.N	1694.8185	0.00		2
						K.TYDSGNTGVLVNTPVMFR.N	1998.9914	0.00		2
						R.ENPNSPLM(15.995)TTYK.C	928.4324	0.00		2
			WP_003430598.1	ribosome recycling factor	ribosome			0.91	0.1	23
						K.AAEEFKVR.I	1004.5655	0.89		2
						K.AIANSDLGLNPSNDGEVIR.L	1983.0102	1		2
						K.AIANSDLGLNPSNDGEVIR.L	1983.0102	1.01		3
						K.GGELTEDELK.K	1145.5816	0.76		2
						K.GGELTEDELKK.A	1301.7079	0.91		2
						K.GGELTEDELKK.A	1301.7079	0.88		3
						K.SAMHEIEK.A	999.5059	0.89		2
						R.ANAQMLDKIR.V	1214.6805	1.11		2
						R.ANAQMLDKIR.V	1214.6805	1.06		3
						R.ILMISPWDK.S	1157.6519	0.87		2
						R.LSVPALTEER.R	1141.6343	1.08		2
						R.VDYYGTPTPINQIGAISVPEPR.I	2415.2515	0.97		2
						R.VDYYGTPTPINQIGAISVPEPR.I	2415.2515	0.91		3
						K.EIDTLLSKK.E	1129.6958	0.00		2
						K.MTDKFIK.E	965.562	0.00		2
						R.ANAQMLDK.I	945.4954	0.00		2
						R.ILMISPWDKSAM(15.995)HEIEK.A	1446.7615	0.00		4
						R.LSVPALTEERR.K	1297.7354	0.00		3
			WP_003434148.1	triose-phosphate isomerase	triose-phosphate			0.91	0.09	234
						K.GAFTGEVSPLMLK.E	1404.7687	0.84		2
						K.GLYGELANEVR.I	1247.651	1.01		2
						K.TATAEDANDVISYIR.E	1665.821	1.09		2
						K.VVVAYEPIWAIGTGK.T	1657.9443	0.91		2
						K.VVVAYEPIWAIGTGK.T	1657.9443	0.87		3
						R.RQYFNETDETVNKK.V	1855.9509	0.89		3
						R.RQYFNETDETVNKK.V	1855.9509	0.96		4
						K.ALENVLKDDLAK.V	1411.8286	0.00		3
						K.IGAQNMHFEEK.G	1358.6653	0.00		3
						K.TATAEDANDVISYIR.E	1665.821	0.00		3
						R.QYFNETDETVNKK.V	1698.8465	0.00		2
						R.QYFNETDETVNKK.V	1698.8465	0.00		3
			WP_003436172.1	SDR family oxidoreductase	SDR			0.91	0.08	23
						K.AAINSLTQNIATQYAK.D	1761.9625	0.83		2
						K.AAINSLTQNIATQYAK.D	1761.9625	0.94		3
						K.AAINSLTQNIATQYAKDNVR.C	2247.2053	0.91		3
						K.FVYFNAR.E	943.4916	0.84		2
						K.GIGLASAEILAK.N	1197.7333	1		2
						K.IAVVTAATK.G	928.5957	0.85		2
						K.SVYLPCK.A	921.4994	1.03		2
						R.CNAVLPGLIATK.A	1311.7584	1.02		2
						R.IGEPDDIAK.A	1012.5441	0.83		2
						K.AAIPHMIK.N	935.5626	0.00		2
						K.GSIVNISSIGSVLPDLSR.I	1841.0258	0.00		2
						K.NGATVYLAAR.S	1062.5822	0.00		2
						R.SEELANEVINK.I	1300.6875	0.00		2
			WP_003437218.1	alpha/beta hydrolase	alpha/beta			0.91	0.00	2
						K.AYFISPIVNMEK.L	1466.7843	0.91		2
						K.QTNATLTVMR.N	1161.6176	0.00		2
			WP_003437840.1	uracil phosphoribosyltransferase	uracil			0.91	0.05	234
						K.DIPLKDVEIETPIQK.T	1822.0533	0.85		3
						K.KLAIIPILR.A	1091.7794	0.87		2
						K.LAIIPILR.A	935.6532	0.97		2
						K.LANLVAAPEGIAEVQK.Y	1677.9665	0.95		2
						K.VVETNHPLIQHK.L	1469.8355	0.89		3
						M.SKVVETNHPLIQHK.L	1712.9937	0.97		4
						R.AGLGMVDGLVSLMPAAK.V	1684.9256	0.91		2
						K.VVETNHPLIQHK.L	1469.8355	0.00		2
						R.AGLGM(15.995)VDGLVSLM(15.995)PAAK.V	475.2465	0.00		2
						R.AGLGM(15.995)VDGLVSLMPAAK.V	475.2465	0.00		2
						R.AGLGM(15.995)VDGLVSLMPAAK.V	475.2465	0.00		3
						R.AGLGMVDGLVSLM(15.995)PAAK.V	1289.6723	0.00		2
						R.AGLGMVDGLVSLMPAAK.V	1684.9256	0.00		3
			WP_003438469.1	GntR family transcriptional regulator	GntR			0.91	0.03	2
						K.IALDIANK.I	912.5644	0.95		2
						K.ILEDIGVVK.S	1040.6481	0.89		2
						K.IYTGEIQEDSVLFGR.S	1753.8887	0.91		2
						-.MDKNYTMPIYQK.I	1614.815	0.00		3
			WP_003439345.1	deoxyribose-phosphate aldolase	deoxyribose-phosphate			0.91	0.18	23
						K.ATTTWEDIK.I	1119.5812	0.79		2
						K.ICTVIGFPLGYQTTATK.V	1926.0366	0.91		3
						K.ILKNEDTTDY.-	1266.6344	0.75		2
						K.SISDAEKFIEAGAER.L	1677.8574	1.22		3
						K.TSTGMGTGGATLEDIK.L	1593.792	0.93		2
						K.ICTVIGFPLGYQTTATK.V	1926.0366	0.00		2
						K.MCEIVTM(15.995)SGSDFIK.T	910.3962	0.00		2
						K.TSTGM(15.995)GTGGATLEDIKLMK.E	523.2312	0.00		3
						K.TSTGMGTGGATLEDIKLMK.E	1995.0462	0.00		3
						K.TVDHTILK.A	981.5859	0.00		2
						K.VIIETCYLDEDEKIK.M	1952.0257	0.00		3
			WP_003439413.1	shikimate kinase	shikimate			0.91	0.04	23
						K.ETGIIIFIDRPIQK.I	1698.008	0.94		3
						K.FSDIEILNDK.S	1248.6602	0.91		2
						K.ILEDININSRPLLK.N	1693.0138	0.9		3
						K.LILIGMPGSGK.T	1140.6941	0.89		2
						R.LYNLYNER.I	1111.5662	1		2
						K.DVNMEILK.E	1016.5576	0.00		2
						K.EKLILIGMPGSGK.T	1425.8629	0.00		3
						K.KFSDIEILNDK.S	1404.7864	0.00		3
						K.LILIGM(15.995)PGSGK.T	686.4401	0.00		2
						K.TVISTGGGVIKK.D	1242.7911	0.00		2
						K.TVISTGGGVIKK.D	1242.7911	0.00		3
						R.NYETQACR.E	1068.4658	0.00		2
			WP_004454662.1	ABC transporter substrate-binding protein	ABC			0.91	0.00	2
						K.AIEYIYTNPAEAAK.I	1608.8399	0.91		2
						K.IQAFTSCDPWGSVAENDGAGK.I	2266.0406	0.00		2
			WP_004454870.1	hypothetical protein	hypothetical			0.91	0.03	23
						K.QDATNIVEQAK.K	1271.6721	0.91		2
						R.AKDIVDRAER.I	1227.6935	0.95		3
						R.IQQEYQDNIEELKK.N	1861.9867	0.9		3
						K.AYVESSEPVVQADQR.A	1704.8319	0.00		2
						K.QDATNIVEQAKK.E	1427.7984	0.00		2
						K.QDATNIVEQAKK.E	1427.7984	0.00		3
						R.IQQEYQDNIEELKK.N	1861.9867	0.00		2
			WP_009890867.1	cell division protein FtsZ	cell			0.91	0.01	23
						K.VIGVGGGGNNAVNR.M	1310.7055	0.92		2
						R.GLGAGANPEVGKR.A	1280.7201	0.9		3
						K.NAEGGIAELK.S	1056.5815	0.00		2
						R.QAIQSPLLETSIQGAK.G	1738.9829	0.00		2
			WP_009895182.1	proline--tRNA ligase	proline--tRNA			0.91	0.00	2
						R.VAPIQVVIVPIAAK.K	1472.9694	0.91		2
						R.VAPIQVVIVPIAAK.K	1472.9694	0.00		3
			WP_009897952.1	cell wall-binding repeat-containing protein	cell			0.91	0.00	2
						K.NSGNINTISGSEEPSISGK.K	1945.9593	0.91		2
						R.AKDGSYIEAVEIDTSNNEVSR.W	2353.1479	0.00		3
			WP_009902455.1	LamB/YcsF family protein	LamB/YcsF			0.91	0.00	2
						R.FANEVFADR.A	1095.5349	0.91		2
						R.SVEGAVIHDTK.H	1210.6558	0.00		2
			WP_003418356.1	dihydropteroate synthase	dihydropteroate			0.92	0.04	23
						K.ALAERDPAPILK.R	1348.8078	0.88		3
						K.ALAERDPAPILKR.A	1504.9089	0.92		3
						K.LLQSEFNNVPIALDTANK.K	2043.1082	0.95		3
						K.LLQSEFNNVPIALDTANKK.A	2199.2344	0.91		3
						K.QVEVLEAIK.M	1083.654	0.87		2
						R.DGEEIMTWGIK.L	1333.6588	0.95		2
						R.IHCISPSIRK.A	1265.7278	0.85		3
						R.MAYCQEILEK.G	1339.6516	0.92		2
						R.TNAKPIINSADAGSR.F	1569.8475	0.98		3
						K.LLQSEFNNVPIALDTANK.K	2043.1082	0.00		2
						K.M(15.995)M(15.995)TEMGLLTTGGLSNVSNGCPK.H	177.0824	0.00		3
						K.M(15.995)MTEM(15.995)GLLTTGGLSNVSNGCPK.H	177.0824	0.00		3
						K.MM(15.995)TEM(15.995)GLLTTGGLSNVSNGCPK.H	308.1228	0.00		2
						K.MMTEMGLLTTGGLSNVSNGCPK.H	2354.1184	0.00		2
						R.DGEEIM(15.995)TWGIK.L	720.3	0.00		2
						R.DNDERM(15.995)AYCQEILEK.G	806.3229	0.00		3
						R.DNDERMAYCQEILEK.G	1969.8955	0.00		3
						R.M(15.995)AYCQEILEK.G	177.0824	0.00		2
			WP_003422061.1	aspartate-semialdehyde dehydrogenase	aspartate-semialdehyde			0.92	0.00	2
						R.VVYSTYQAVSGSGVK.G	1599.8508	0.92		2
			WP_003428740.1	acetyl-CoA carboxylase biotin carboxyl carrier protein	acetyl-CoA			0.92	0.00	2
						K.AIDSTNLEYVK.L	1307.6973	0.92		2
			WP_003429416.1	GTP cyclohydrolase I FolE	GTP			0.92	0.04	234
						R.AEAMSLITMK.-	1149.6138	0.97		2
						R.EILEAIGEDPDREGLIETPNR.V	2394.2108	0.92		3
						R.MYEEIFSGLSEEPRDHLK.V	2236.0915	0.9		4
						R.AEAM(15.995)SLITMK.-	448.1992	0.00		2
						R.AEAMSLITM(15.995)K.-	993.4875	0.00		2
						R.M(15.995)YEEIFSGLSEEPR.D	177.0824	0.00		2
						R.MYEEIFSGLSEEPR.D	1713.792	0.00		2
			WP_003432265.1	cyclodeaminase/cyclohydrolase family protein	cyclodeaminase/cyclohydrolase			0.92	0.08	234
						K.AYGLPKETEEEKR.I	1632.8723	0.83		4
						K.MIDDDAECFLPLSK.A	1708.8052	0.94		2
						K.VACEVPLNIVR.V	1296.7224	0.99		2
						K.YAEYEESVKEILSK.A	1770.9291	0.78		3
						R.LAISDVGVGVQCLR.A	1513.8287	0.95		2
						R.LAISDVGVGVQCLR.A	1513.8287	0.9		3
						K.LHEDLVDKGSR.L	1323.7147	0.00		3
						K.M(15.995)IDDDAECFLPLSK.A	177.0824	0.00		2
						K.MIDDDAECFLPLSK.A	1708.8052	0.00		3
						K.TEVDKLVEDGVK.I	1414.7919	0.00		3
			WP_003434301.1	nitroreductase family protein	nitroreductase			0.92	0.07	2
						K.GIQNEINDNGLLPGSR.Q	1723.8853	0.97		2
						K.IIEAGINAPSSK.N	1254.7184	0.83		2
						R.LQLSDVTEWR.-	1273.6667	0.92		2
						K.NQSISHETIEK.I	1340.6936	0.00		2
						K.YKNQSISHETIEK.I	1659.8832	0.00		3
						K.YKNQSISHETIEK.I	1659.8832	0.00		4
			WP_003434417.1	ribosome-associated translation inhibitor RaiA	ribosome-associated			0.92	0.06	234
						-.MNIIISGK.Q	930.5572	0.93		2
						K.LSKLDNYIHPDTDVK.V	1841.9968	0.81		3
						K.LSKLDNYIHPDTDVK.V	1841.9968	0.9		4
						K.NIDSDEIAVVYK.R	1420.745	0.99		2
						K.NIDSDEIAVVYKR.N	1576.8461	0.94		2
						K.NIDSDEIAVVYKR.N	1576.8461	0.91		3
						K.QIELTDAIK.N	1085.6332	0.92		2
						R.NNGGYGIIEHE.-	1229.5677	1.03		2
						K.LDNYIHPDTDVK.V	1484.7511	0.00		3
						K.LSKLDNYIHPDTDVK.V	1841.9968	0.00		2
						K.QIELTDAIKNK.I	1355.8024	0.00		2
						K.QIELTDAIKNKIETK.L	1856.1064	0.00		4
			WP_003435673.1	50S ribosomal protein L5	50S			0.92	0.08	234
						K.EQLIFPEIEYDKIDK.V	1964.0588	1		3
						K.EQLIFPEIEYDKIDKVR.G	2219.2283	0.83		3
						K.EQLIFPEIEYDKIDKVR.G	2219.2283	0.92		4
						K.EVAPALMEK.F	1042.5733	0.91		2
						K.FGYKNVMEIPK.L	1408.7788	0.75		3
						K.GVEELEMISGQKPVITK.A	1942.089	0.87		2
						K.GVEELEMISGQKPVITK.A	1942.089	0.86		3
						K.IVINMGIGDAR.E	1185.654	0.96		2
						K.IVINMGIGDARENPK.G	1681.9185	0.88		3
						K.LLGMPFSK.-	947.5514	0.91		2
						K.LREGMPIGTK.V	1156.6638	0.91		2
						K.LVSVSLPR.V	897.5648	1		2
						K.NVMEIPK.L	885.4994	0.91		2
						K.NVMEIPKLNK.I	1268.7526	0.86		3
						K.TDEEARELLK.L	1258.6769	0.98		2
						K.TDEEARELLK.L	1258.6769	1		3
						K.YMKEVAPALMEK.F	1492.8033	0.7		2
						K.YMKEVAPALMEK.F	1492.8033	0.82		3
						R.DFRGVNPNAFDGR.G	1491.7219	1.02		3
						R.GMDIIFVTTAK.T	1250.6944	0.92		2
						R.GNYALGVK.E	876.5069	1		2
						R.GVNPNAFDGR.G	1073.5254	0.97		2
						R.GVNPNAFDGRGNYALGVK.E	1904.9938	0.93		2
						R.GVNPNAFDGRGNYALGVK.E	1904.9938	0.95		3
						K.EQLIFPEIEYDKIDK.V	1964.0588	0.00		2
						K.EVAPALM(15.995)EK.F	757.4044	0.00		2
						K.GVEELEM(15.995)ISGQKPVITK.A	833.3841	0.00		2
						K.GVEELEM(15.995)ISGQKPVITK.A	833.3841	0.00		3
						K.GVEELEMISGQKPVITK.A	1942.089	0.00		4
						K.IVINM(15.995)GIGDAR.E	616.3618	0.00		2
						K.IVINM(15.995)GIGDARENPK.G	616.3618	0.00		3
						K.IVINMGIGDARENPK.G	1681.9185	0.00		2
						K.MFYFMDK.L	1036.4762	0.00		2
						K.NVMEIPKLNK.I	1268.7526	0.00		2
						K.YM(15.995)KEVAPALM(15.995)EK.F	340.1457	0.00		3
						K.YM(15.995)KEVAPALMEK.F	340.1457	0.00		3
						K.YMKEVAPALM(15.995)EK.F	1207.6345	0.00		3
						R.DFRGVNPNAFDGR.G	1491.7219	0.00		2
						R.GM(15.995)DIIFVTTAK.T	234.1038	0.00		2
						R.GM(15.995)DIIFVTTAKTDEEAR.E	234.1038	0.00		3
						R.KSVANFK.L	876.5433	0.00		2
			WP_003437079.1	DUF1015 domain-containing protein	DUF1015			0.92	0.04	2
						K.VAALPYDVMNSK.E	1362.7217	0.9		2
						R.IDFIGGIR.G	917.5335	0.95		2
						K.VAALPYDVM(15.995)NSK.E	1005.5205	0.00		2
			WP_009887887.1	50S ribosomal protein L4	50S			0.92	0.07	234
						K.ALVVIADKNDNVIK.S	1594.9658	0.93		2
						K.ALVVIADKNDNVIK.S	1594.9658	0.92		3
						K.KALVVIADKNDNVIK.S	1751.0921	0.78		3
						K.KALVVIADKNDNVIK.S	1751.0921	0.96		4
						K.TKEFAQILNNINAAK.K	1758.004	0.91		2
						K.TKEFAQILNNINAAK.K	1758.004	0.96		3
						K.TKEFAQILNNINAAKK.A	1915.1336	0.88		3
						K.TKEFAQILNNINAAKK.A	1915.1336	0.99		4
						K.VQNSEVIVLDALNMDAPK.T	2012.0693	0.88		2
						K.VQNSEVIVLDALNMDAPK.T	2012.0693	0.9		3
						K.YDSFIITTDAVK.K	1427.7548	0.93		2
						R.SVQWVGGGVAFAPKPR.S	1711.9603	0.96		2
						R.SVQWVGGGVAFAPKPR.S	1711.9603	1.05		3
						R.SYKYTLPK.K	1082.6376	0.83		2
						K.EFAQILNNINAAK.K	1500.83	0.00		2
						K.VQNSEVIVLDALNM(15.995)DAPK.T	1571.8229	0.00		2
						K.VQNSEVIVLDALNM(15.995)DAPK.T	1571.8229	0.00		3
						N.SEVIVLDALNMDAPK.T	1669.8961	0.00		2
						R.SVQWVGGGVAFAPK.P	1457.8031	0.00		3
			WP_009895388.1	energy-coupling factor ABC transporter permease	energy-coupling			0.92	0.00	2
						K.SILENNDKGVK.A	1299.7398	0.92		2
						K.SILENNDKGVK.A	1299.7398	0.00		3
			WP_009901734.1	bifunctional phosphoribosylaminoimidazolecarboxamide formyltran	bifunctional			0.92	0.1	23
						K.ELNKLDYEIISTGNTFK.T	2069.1126	0.84		3
						K.IENSLQPYEMK.Y	1406.7116	0.87		2
						K.NGQTLALGCGQTSR.I	1489.7307	1.05		2
						K.SNAIAIVK.N	870.5539	0.98		2
						K.LKTDTMTLEDR.K	1377.7174	0.00		3
						R.YGENPHQNGFLYSQSNAK.N	2109.9949	0.00		3
			WP_009902040.1	4Fe-4S binding protein	4Fe-4S			0.92	0.00	2
						R.GQLFNLLGNK.L	1158.6761	0.92		2
						R.GQLFNLLGNKLK.L	1427.8864	0.00		3
			WP_009902250.1	phosphodiesterase	phosphodiesterase			0.92	0.00	2
						R.NDIPEGYNPK.K	1201.5979	0.92		2
						R.IILNHGYIESEEEIIDKAK.K	2298.2552	0.00		4
			WP_003416528.1	uracil-DNA glycosylase	uracil-DNA			0.93	0	23
						K.LGKEPINWQIENI.-	1608.8875	0.93		2
						K.NKGWEIFTDR.V	1320.6826	0.93		3
						K.FLIEEYK.T	996.5532	0.00		2
						K.FLIEEYKTR.Q	1253.702	0.00		2
						R.KKVELIDTSK.H	1271.8064	0.00		3
			WP_003421168.1	50S ribosomal protein L2	50S			0.93	0.00	2
						K.VATIEYDPNR.T	1204.6088	0.93		2
						K.ATIGQVGNIEHGNVVIGK.A	1862.0455	0.00		3
						R.SAGVSAQLMAK.E	1117.6165	0.00		2
			WP_003423115.1	fructose-6-phosphate aldolase	fructose-6-phosphate			0.93	0.06	23
						K.EGRDFIEVVK.E	1246.6921	0.93		3
						K.GMIEEAEK.L	961.479	0.89		2
						K.GMIEEAEKLSK.I	1317.7214	0.9		2
						K.GMIEEAEKLSK.I	1317.7214	0.96		3
						K.IPMTAEGLK.A	1014.5784	0.88		2
						K.TNVTLIFSAGQALLAAR.A	1773.0149	1.07		2
						R.AGATYVSPFVGR.L	1251.6612	0.98		2
						R.MGADIATVPLK.V	1170.6682	0.93		2
						R.M(15.995)GADIATVPLK.V	177.0824	0.00		2
						R.NPIHVLQAAR.M	1145.6669	0.00		2
			WP_003427762.1	acyl-CoA dehydrogenase family protein	acyl-CoA			0.93	0.03	23
						K.FQNTQFTIADMETK.V	1728.8393	0.93		2
						K.IAMGTLEVGR.I	1073.5903	1		2
						K.MVISSNVLK.-	1045.6206	0.92		2
						K.YYASEIANEVAYK.A	1575.7821	0.93		2
						R.GLVYDAAQKR.D	1175.6663	0.95		2
						R.IVSIYEGTSEVQK.M	1507.8134	0.97		2
						R.IVSIYEGTSEVQK.M	1507.8134	0.9		3
						K.FQNTQFTIADM(15.995)ETK.V	1342.6227	0.00		2
						K.FQNTQFTIADMETK.V	1728.8393	0.00		3
						K.IAM(15.995)GTLEVGR.I	361.2035	0.00		2
			WP_003431873.1	proline reductase-associated electron transfer protein Prd	proline			0.93	0.04	2
						K.ATTLDAPITK.T	1085.6332	0.93		2
						K.MGVTDIVSVQK.C	1231.6846	0.9		2
						K.TSGGIIVTMPFVNEK.R	1647.8906	0.98		2
						K.AGAEVILIGNCTDCSNTVM(15.995)GSAPK.L	2052.936	0.00		3
						K.AGAEVILIGNCTDCSNTVMGSAPK.L	2521.2056	0.00		3
						K.EAGVVGMGGAGFPTHVK.L	1668.8658	0.00		3
						K.M(15.995)GLLVCACGPNEER.M	177.0824	0.00		2
						K.MGLLVCACGPNEER.M	1632.7422	0.00		2
						K.NITVVGQLNSGK.E	1284.7402	0.00		2
						K.TSGGIIVTM(15.995)PFVNEK.R	905.4892	0.00		2
						K.YAMEVTNAGK.G	1138.5692	0.00		2
						R.AGGIKGEYGEIILGGPFTGK.A	2048.1387	0.00		3
						R.KMGLLVCACGPNEER.M	1788.8685	0.00		3
			WP_003435668.1	50S ribosomal protein L6	50S			0.93	0.09	234
						K.EENTIMVERPTDNKK.H	1886.9772	0.82		3
						K.EENTIMVERPTDNKK.H	1886.9772	0.97		4
						K.GIDKQLVGNYAAK.I	1459.8399	1.02		2
						K.GIDKQLVGNYAAK.I	1459.8399	1.1		3
						K.QLVGNYAAK.I	1018.5811	0.88		2
						K.YVDEVIR.R	920.4967	0.93		2
						R.TLLDNMVVGVNTGFEK.K	1791.9441	0.93		2
						K.GIKYVDEVIR.R	1246.7285	0.00		3
						R.TLLDNM(15.995)VVGVNTGFEK.K	733.368	0.00		2
						R.TLLDNM(15.995)VVGVNTGFEK.K	733.368	0.00		3
			WP_003436064.1	phosphoribosylglycinamide formyltransferase	phosphoribosylglycinamide			0.93	0.13	23
						K.QGAYGLER.A	920.4716	1.13		2
						K.RVLEVEHR.I	1064.6091	0.93		2
						K.VHQGVIDYGAK.V	1241.6768	0.9		3
						K.ESISLFCENK.L	1281.6275	0.00		2
						K.ESISLFCENKLK.L	1550.8378	0.00		3
						K.VTGATVHFVDEGADTGPIIM(15.995)QDVVK.V	2058.0173	0.00		3
			WP_003437730.1	precorrin-6A reductase	precorrin-6A			0.93	0.1	23
						K.IIDATHPYAVEVSK.T	1597.8716	0.86		3
						R.VLPTSEVILSCEK.L	1529.8375	1		2
						K.ESGIAGGFLEK.V	1162.6234	0.00		2
			WP_004454512.1	TerD family protein	TerD			0.93	0.12	23
						K.GFFGSLR.S	810.4388	1.03		2
						K.QKQDSDLVVK.L	1242.7184	0.8		2
						R.EMDTEFHWGLK.W	1447.6806	0.93		3
			WP_009889571.1	nucleoside hydrolase	nucleoside			0.93	0.00	2
						K.VSIIALAPLTNIAK.A	1478.9436	0.93		2
			WP_009902140.1	nitroreductase	nitroreductase			0.93	0.06	23
						-.MNNNFQDNQTINLIQSR.R	2078.0044	0.96		2
						-.MNNNFQDNQTINLIQSR.R	2078.0044	1.03		3
						K.LLKEISDDTLSR.I	1444.8137	0.92		2
						K.LLKEISDDTLSR.I	1444.8137	0.94		3
						R.IHEVSNVEINK.N	1336.7351	0.84		2
						R.IHEVSNVEINK.N	1336.7351	0.9		3
						-.M(15.995)NNNFQDNQTINLIQSR.R	177.0824	0.00		2
						K.QPWHITVVQDQK.L	1533.8304	0.00		3
			WP_003416006.1	hypoxanthine phosphoribosyltransferase	hypoxanthine			0.94	0.00	2
						K.GASVFVSDLIR.C	1190.6659	0.94		2
			WP_003416871.1	glycine/sarcosine/betaine reductase component B subunit	glycine/sarcosine/betaine			0.94	0.09	234
						K.AAMYLGEVAR.N	1107.5747	1		2
						K.GVAVVTTGK.I	886.5488	0.89		2
						K.IVGFQEGIIDMTGEGAK.Y	1819.939	0.86		2
						K.IVGFQEGIIDMTGEGAK.Y	1819.939	0.88		3
						K.LNNVVVIAEPIDGLK.Q	1648.9764	0.99		2
						K.LNNVVVIAEPIDGLKQYAHEK.A	2434.3665	0.94		4
						K.SIDIELARPGESVR.I	1568.8522	1.11		3
						K.THALKGVAVVTTGK.I	1464.9028	1		3
						K.TVIVTDEYAGR.D	1250.6507	1.07		2
						K.TVIVTDEYAGRDGGSQSLADADVR.A	2523.2282	1.09		3
						R.ADAVVTGGNANQVVVLPK.L	1807.0204	0.92		2
						R.ITPVKDVIEPR.V	1321.7969	0.92		2
						R.ITPVKDVIEPR.V	1321.7969	0.93		3
						R.VKVEGNGGIFPGIMSK.V	1715.9644	0.82		3
						K.AAM(15.995)YLGEVAR.N	319.1566	0.00		2
						K.IVGFQEGIIDM(15.995)TGEGAK.Y	1248.6424	0.00		2
						K.IVGFQEGIIDM(15.995)TGEGAK.Y	1248.6424	0.00		3
						K.LNNVVVIAEPIDGLK.Q	1648.9764	0.00		3
						K.QEMLQEIGGDEHIK.S	1681.8345	0.00		3
						K.THALKGVAVVTTGK.I	1464.9028	0.00		2
						K.VEGNGGIFPGIMSK.V	1460.7697	0.00		2
						R.ADAVVTGGNANQVVVLPKLDK.V	2192.261	0.00		3
						R.DGGSQSLADADVR.A	1317.6161	0.00		2
						R.DGGSQSLADADVRADAVVTGGNANQVVVLPK.L	3079.5979	0.00		3
						R.VKVEGNGGIFPGIM(15.995)SK.V	1472.8061	0.00		2
						R.VKVEGNGGIFPGIMSK.V	1715.9644	0.00		2
			WP_003418888.1	acyl-CoA dehydrogenase	acyl-CoA			0.94	0.05	2
						K.IAMSTLDGGR.I	1047.5383	0.91		2
						K.ITEIYEGTSEVQR.M	1551.7781	0.98		2
						K.AVQLHGGYGYTR.D	1348.6888	0.00		3
						K.FQNTQFQLADM(15.995)EVK.V	1369.6336	0.00		2
						K.FQNTQFQLADMEVK.V	1753.8709	0.00		2
						K.ITEIYEGTSEVQR.M	1551.7781	0.00		3
			WP_003421962.1	type I glyceraldehyde-3-phosphate dehydrogenase	type			0.94	0.15	23
						K.AIGLVIPSLK.G	1065.7162	0.92		2
						K.NVTVEEINAAMK.E	1373.7225	1.27		2
						K.VVISAPATGDLK.T	1225.7282	0.88		2
						R.AAAGNIVPNTTGAAK.A	1410.7831	0.9		2
						R.TLGYFAQLAK.-	1166.6699	1.04		2
						R.VPVVTGSITELVCTLGK.N	1829.0413	0.97		3
						K.DKAEAHIQAGAK.K	1321.7354	0.00		3
						K.GLM(15.995)TTIHAYTNDQNTLDGPHPK.G	347.1879	0.00		3
						K.NVTVEEINAAM(15.995)K.E	1217.5962	0.00		2
						K.VLNDKYGIEK.G	1261.7282	0.00		2
			WP_003422104.1	D-proline reductase (dithiol) proprotein PrdA	D-proline			0.94	0.12	23
						K.AGTNMERPGPLAAHR.A	1604.8205	1.02		3
						K.IVLEENEQSLPMSK.K	1671.8753	0.92		2
						K.IVLEENEQSLPMSKK.R	1828.0016	0.78		3
						K.LNNIEAIEK.V	1098.6285	0.95		2
						K.LNNIEAIEKVTGEK.I	1640.9349	0.89		3
						K.NAIEGVEVK.A	1013.5757	0.93		2
						K.QGIENEILSNNTLAPEDAVR.I	2211.1213	1		2
						K.QGIENEILSNNTLAPEDAVR.I	2211.1213	0.84		3
						K.SKQGIENEILSNNTLAPEDAVR.I	2454.2795	0.97		3
						K.VTGEKIVLEENEQSLPMSK.K	2215.1851	0.8		3
						M.SITLETAQAHANDPAVCCCR.F	2302.0334	1.11		3
						R.HYWREPLVIR.A	1395.7775	1.19		3
						K.IVLEENEQSLPM(15.995)SK.K	1428.717	0.00		2
						K.IVLEENEQSLPM(15.995)SK.K	1428.717	0.00		3
						K.IVLEENEQSLPM(15.995)SKK.R	1428.717	0.00		3
						K.IVLEENEQSLPMSK.K	1671.8753	0.00		3
						K.IVLEENEQSLPMSKK.R	1828.0016	0.00		2
						K.LKETLDALSPMTTDNVEGYK.A	2309.1906	0.00		3
						K.NAIEGVEVKAPER.K	1466.8093	0.00		3
						K.VTGEKIVLEENEQSLPM(15.995)SK.K	1972.0268	0.00		3
						K.YMTHMVDNNK.S	1307.6002	0.00		2
						K.YMTHMVDNNK.S	1307.6002	0.00		3
						K.YMTHMVDNNKSK.Q	1550.7585	0.00		3
			WP_003422204.1	transcription elongation factor GreA	transcription			0.94	0	23
						K.EVVEVQVPDGVAK.F	1423.7922	0.94		2
						K.EVVEVQVPDGVAK.F	1423.7922	0.94		3
						R.AAKEVVEVQVPDGVAK.F	1721.9927	0.94		3
						R.KAVIIDESK.I	1085.6696	0.00		2
			WP_003426928.1	DivIVA domain-containing protein	DivIVA			0.94	0.19	23
						-.MLTPIEIENK.E	1242.6894	0.55		2
						K.ATLITAQSAAEDTCSAANK.K	1978.9711	1.13		2
						K.ATLITAQSAAEDTCSAANK.K	1978.9711	0.93		3
						K.ATLITAQSAAEDTCSAANKK.A	2135.0973	0.94		3
						K.IIVEEADLK.A	1084.638	0.93		2
						K.SLLEDEIR.S	1001.5393	1.1		2
						R.QIIEQANNR.V	1112.5938	1.01		2
						K.IIVEEADLKAR.Q	1311.7762	0.00		3
						R.SVDEIFYDVDEK.C	1513.7188	0.00		2
			WP_003428430.1	GNAT family N-acetyltransferase	GNAT			0.94	0.00	2
						K.NGVDVLIR.E	912.5393	0.94		2
			WP_003428771.1	cyclase family protein	cyclase			0.94	8.4	23
						K.AYVLELEK.G	1019.5903	1.09		2
						K.EAANYIANTNIK.G	1376.73	0.92		2
						K.FLFIAAPFK.Y	1108.6685	0.94		2
						K.GNENIELEYLK.K	1376.7188	20		2
						K.IIIENLTNLENVPEK.F	1794.0139	0.92		2
						K.IIIENLTNLENVPEK.F	1794.0139	0.89		3
						K.KQYYVGYPTLTK.E	1543.865	20		3
						K.QYYVGYPTLTK.E	1387.7388	0.92		2
						K.YNDADGAPVR.A	1104.52	0.96		2
						K.GETLDKLDIENFVGK.A	1760.956	0.00		2
			WP_003429754.1	ABC transporter ATP-binding protein	ABC			0.94	0.09	23
						K.QKPLQLSGGQQQR.V	1522.858	1		3
						K.TIIMVTHDQDLTK.Y	1569.8436	0.94		3
						R.LKDGVFTSEV.-	1149.6281	0.83		2
						K.TIIMVTHDQDLTK.Y	1569.8436	0.00		2
						R.YIFDGTDVTNLSENER.S	1900.8884	0.00		2
			WP_003431138.1	ribulose-phosphate 3-epimerase	ribulose-phosphate			0.94	0.04	2
						K.AGVVLNPATPVDTIK.H	1549.9079	0.92		2
						K.LAPSILSADFAK.L	1287.7438	0.91		2
						K.NASLEELV.-	901.4757	0.99		2
						R.KNASLEELV.-	1057.6019	0.96		2
			WP_003434069.1	cell division protein	cell			0.94	0.09	23
						K.AVSYMSNER.R	1083.5019	0.87		2
						K.AVSYMSNERR.V	1239.603	1		3
						R.EFKINNDSIFK.F	1437.7868	0.00		3
			WP_003435129.1	lactate utilization protein	lactate			0.94	0.02	23
						K.GYLVSNKEELLK.K	1475.8599	0.95		2
						K.GYLVSNKEELLK.K	1475.8599	0.94		3
						K.TIAAPANCK.R	1000.5376	0.96		2
						K.VIVIAGVNK.I	967.643	0.92		2
						R.ICCSYTLIK.R	1212.6247	0.93		2
						R.IHVIFLNEDFGY.-	1493.7555	0.94		2
						R.VAAMIYGPDK.V	1119.5998	0.9		2
						-.M(15.995)DQNLNWLNEK.R	177.0824	0.00		2
						K.DVDEAIKR.T	1000.5553	0.00		2
						K.IVKDVDEAIKR.T	1368.8341	0.00		2
						K.IVKDVDEAIKR.T	1368.8341	0.00		3
						K.TTGICIDCSSPGR.I	1450.6545	0.00		2
			WP_003437525.1	NUDIX hydrolase	NUDIX			0.94	0.00	2
						K.ILGGGLPYESAVQR.V	1486.8144	0.94		2
						K.KLVSEGDDVPAN.-	1298.6718	0.00		2
						R.CAGGVVFYANK.V	1240.6274	0.00		2
			WP_009887855.1	23S rRNA (guanosine(2251)-2-O)-methyltransferase RlmB	23S			0.94	0.02	23
						K.VTNIVNTIK.R	1056.6543	0.95		2
						K.VTNIVNTIKR.L	1212.7554	0.91		3
						R.TADAVGAHGVIIPK.R	1403.8137	0.94		3
						K.ASAGAVEYM(15.995)PVCK.V	925.4215	0.00		2
						K.ASAGAVEYMPVCK.V	1437.6996	0.00		2
						R.TADAVGAHGVIIPK.R	1403.8137	0.00		2
			WP_009889364.1	tyrosine--tRNA ligase	tyrosine--tRNA			0.94	0.04	2
						K.ALTTEQVLANAK.T	1313.7555	0.97		2
						K.SMEIPDELIIK.Y	1342.7418	0.92		2
						K.GVDDLIDEKELR.E	1456.7773	0.00		2
						K.GVDDLIDEKELR.E	1456.7773	0.00		3
						K.LGLDPSAPDIHLGHTVVLR.K	2038.1405	0.00		4
						K.SM(15.995)EIPDELIIK.Y	264.1144	0.00		2
						K.TYEEQIFK.V	1112.5754	0.00		2
						R.EIVTLYHGEESAK.E	1530.793	0.00		3
						R.EIVTLYHGEESAKEAEER.F	2146.0623	0.00		3
						R.KALTTEQVLANAK.T	1469.8817	0.00		3
			WP_009891793.1	4Fe-4S dicluster domain-containing protein	4Fe-4S			0.94	0.08	2
						K.GDNFCMPIQCR.H	1424.5999	1.05		2
						K.IACISACPQEALK.L	1515.7789	0.89		2
						K.IGSFVIADPNK.C	1215.6863	0.94		2
						R.HCEDAPCLNSCPQK.A	1770.7488	0.00		2
						R.HCEDAPCLNSCPQK.A	1770.7488	0.00		3
			WP_009898069.1	bifunctional acetaldehyde-CoA/alcohol dehydrogenase	bifunctional			0.94	0.1	23
						K.AVTDLLDEMNIK.H	1416.7534	0.86		2
						K.IFATYSQEQVDK.I	1483.7559	0.94		2
						K.IVGQTACTIAK.L	1216.6849	0.95		2
						K.SIFEYLPR.A	1051.5702	1.06		2
						K.TAVNSILVSK.T	1086.6649	0.99		2
						K.TCGVIEKDEAFGMTK.I	1768.874	0.89		3
						R.ILINTPSSQGGIGDLYNFK.L	2093.1238	0.77		2
						R.NGIIFSPHPR.A	1164.6404	1		2
						R.YAEIASFLGLK.G	1266.7224	0.8		2
						K.ASDFDDAVR.K	1022.4669	0.00		2
						K.AVTDLLDEM(15.995)NIK.H	1033.5002	0.00		2
						K.ETGMGIAEDKVIK.N	1473.8113	0.00		3
						K.EVDLTLATGGPGMVK.S	1542.8327	0.00		2
						K.HTTFFEVEPDPTLECAK.I	2076.9908	0.00		3
						K.LAGFEVPVDTK.V	1230.686	0.00		2
						K.LVEDGGFGHTSSLYIDDVNQR.E	2350.1271	0.00		3
						K.SAYSSGKPAIGVGAGNTPAIIDDSADIK.T	2759.4423	0.00		3
						K.TCGVIEKDEAFGMTK.I	1768.874	0.00		2
						R.ILINTPSSQGGIGDLYNFK.L	2093.1238	0.00		3
			WP_009902281.1	septum formation inhibitor Maf	septum			0.94	0.04	23
						-.MNIILASASPR.R	1199.6696	0.96		2
						R.RKEILENTNVR.F	1426.8256	0.91		3
			WP_009902544.1	3-methyl-2-oxobutanoate hydroxymethyltransferase	3-methyl-2-oxobutanoate			0.94	0.1	234
						K.AGAFSIVLEGVPTK.I	1443.8337	0.85		2
						K.AGAFSIVLEGVPTK.I	1443.8337	0.97		3
						K.EGGAHAVKLEGGSNVIK.Q	1748.9785	0.81		3
						K.EGGAHAVKLEGGSNVIK.Q	1748.9785	0.96		4
						K.HSFSINESELEKLY.-	1750.8778	0.98		3
						K.NYILEVNTGTFPQEK.H	1808.939	1.13		2
						K.QYANIGDIMKDSIK.N	1678.8964	0.87		3
						R.QLIEDAKLIEK.A	1382.8385	0.92		3
						K.EGGAHAVKLEGGSNVIK.Q	1748.9785	0.00		2
						K.HSFSINESELEKLY.-	1750.8778	0.00		2
						K.KLSMLTAYDYSIAK.I	1686.9266	0.00		3
						K.LSM(15.995)LTAYDYSIAK.I	377.1984	0.00		2
						K.QYANIGDIMK.D	1207.6271	0.00		2
			WP_009902687.1	lipoprotein	lipoprotein			0.94	0.15	2
						K.YKGIVIPTF.-	1092.6583	1.05		2
						R.YLESIGLLTLPK.G	1401.8483	0.84		2
						K.GDGLVSPKDIIENPK.G	1664.9349	0.00		3
			WP_009903399.1	C-GCAxxG-C-C family protein	C-GCAxxG-C-C			0.94	0.21	2
						K.LASGFPIGLGK.A	1114.675	0.8		2
						R.NISEEYFR.K	1084.5189	1.09		2
			WP_009903738.1	pyruvate kinase	pyruvate			0.94	0.08	2
						K.INLPAITPK.D	1021.6536	0.88		2
						K.SPIIATTNNEK.T	1242.682	1		2
						K.SSVAGNTDEVIEK.A	1403.7144	0.00		2
			contaminant_KERATIN12	no description	no			0.94	0.00	2
						R.LAADDFR.T	834.4236	0.94		2
						K.ATMQNLNDR.L	1089.5237	0.00		2
			WP_003419758.1	DUF3867 domain-containing protein	DUF3867			0.95	0.04	2
						K.MSMAEFSR.K	985.4361	0.98		2
						K.VVMCETTNKYDY.-	1577.7106	0.92		2
						K.VVM(15.995)CETTNKYDY.-	375.2192	0.00		2
						R.NFGIDPSTAGFM(15.995)SNNTSSK.V	1283.5856	0.00		2
						R.NFGIDPSTAGFMSNNTSSK.V	2030.9449	0.00		2
						R.NFGIDPSTAGFMSNNTSSK.V	2030.9449	0.00		3
						R.YGMDTEEVEK.Q	1255.5642	0.00		2
			WP_003421173.1	50S ribosomal protein L3	50S			0.95	0.09	234
						K.ADVFEAGAK.I	962.5073	0.71		2
						K.EFRVDSVEGYTVGQEIK.A	2012.0296	0.79		3
						K.GFQGPIKR.H	957.576	0.95		2
						K.GVVIPVTAVEAGPMVVTQIK.T	2064.2098	0.94		2
						K.GVVIPVTAVEAGPMVVTQIK.T	2064.2098	0.95		3
						K.IDVTGISK.G	887.5328	0.91		2
						K.KGHLAAANVLK.K	1204.7656	0.98		3
						K.KVGMTQIFTDK.G	1350.7581	0.95		3
						K.TVDKDGYNAIQIGFEDAKEK.A	2353.2247	1.01		3
						K.TVDKDGYNAIQIGFEDAKEK.A	2353.2247	0.95		4
						K.VDADKNLILVK.G	1310.8173	0.76		2
						K.VGMTQIFTDK.G	1194.6318	0.99		2
						K.VTVQNLEVVK.V	1183.7176	0.95		2
						R.RPGSMGACSYPGR.V	1422.6496	0.98		3
						R.VDSVEGYTVGQEIK.A	1578.8141	0.81		2
						K.GSVVTIKEAIK.V	1227.7802	0.00		3
						K.GVVIPVTAVEAGPM(15.995)VVTQIK.T	1366.753	0.00		2
						K.GVVIPVTAVEAGPM(15.995)VVTQIK.T	1366.753	0.00		3
						R.RPGSM(15.995)GACSYPGR.V	574.2897	0.00		3
			WP_003421188.1	50S ribosomal protein L1	50S			0.95	0.08	23
						K.AKEAEQAGADFVGAEELVQK.I	2174.13	0.76		2
						K.AKEAEQAGADFVGAEELVQK.I	2174.13	0.93		3
						K.EAEQAGADFVGAEELVQK.I	1946.9666	0.91		2
						K.EAEQAGADFVGAEELVQK.I	1946.9666	0.93		3
						K.FDETVEAHIK.L	1243.6449	0.99		3
						K.GLMPNPK.S	811.4626	0.95		2
						K.RVLVFAK.G	887.5957	0.98		2
						K.SGTVTFDVAK.A	1079.5863	1.03		2
						K.TNIIHVPVGK.V	1132.6968	1.01		2
						R.GAVVLPHGTGK.T	1090.6499	0.93		2
						R.LDKTNIIHVPVGK.V	1516.9341	0.83		3
						R.SITVASSMGPGVK.I	1288.7061	1.04		2
						R.SITVASSMGPGVK.I	1288.7061	1.04		3
						K.AKEAEQAGADFVGAEELVQK.I	2174.13	0.00		4
						K.FDETVEAHIK.L	1243.6449	0.00		2
						K.LTENFTALM(15.995)DAIIK.A	1066.5369	0.00		2
						K.LTENFTALM(15.995)DAIIK.A	1066.5369	0.00		3
						R.SITVASSM(15.995)GPGVK.I	822.4157	0.00		2
						R.YAGALQKVDR.T	1175.6663	0.00		2
			WP_003428343.1	hypothetical protein	hypothetical			0.95	0.28	23
						-.MKHLYEEVAYLK.G	1606.8793	0.82		3
						K.AVILSSEDDCDDDCTCGGCSSCDDRE.-	3026.0658	1.02		2
						K.AVILSSEDDCDDDCTCGGCSSCDDRE.-	3026.0658	1.01		3
						K.GLAEGLEISAESK.E	1358.7293	0.95		2
						K.GLAEGLEISAESKEGK.M	1700.9196	0.37		2
						K.GLAEGLEISAESKEGK.M	1700.9196	0.87		3
						K.HLYEEVAYLK.G	1319.7125	1.27		2
						-.M(15.995)KHLYEEVAYLK.G	177.0824	0.00		3
						K.AVILSSEDDCDDDCTCGG.C	2015.7394	0.00		2
						K.AVILSSEDDCDDDCTCGGCSS.C	2350.8375	0.00		2
			WP_003432442.1	3-methyl-2-oxobutanoate dehydrogenase subunit VorB	3-methyl-2-oxobutanoate			0.95	0.00	2
						K.IIAGELVAGGAR.-	1153.6819	0.95		2
						R.GGPGLGSIQPSQADYFM(15.995)STR.G	1751.8189	0.00		2
						R.GGPGLGSIQPSQADYFM(15.995)STR.G	1751.8189	0.00		3
						R.GGPGLGSIQPSQADYFMSTR.G	2097.0031	0.00		2
						R.GGPGLGSIQPSQADYFMSTR.G	2097.0031	0.00		3
						R.VMTSSSSPGVALK.Q	1318.7166	0.00		2
			WP_003438268.1	GTP-sensing pleiotropic transcriptional regulator CodY	GTP-sensing			0.95	0.11	23
						K.ILEIFPEEHGR.L	1366.7245	0.87		3
						K.YTTVVPILGSGQR.L	1417.7929	1.03		2
						R.AIGEELEEEMR.K	1332.6231	0.00		2
			WP_004454633.1	xanthine phosphoribosyltransferase	xanthine			0.95	0.06	23
						K.ANDVRLESLAVVESIDNGTVK.F	2285.2308	1.04		3
						K.GFQAGGALLK.A	1016.6019	0.94		2
						K.NLDKDVYETNVYSFTK.A	2020.0234	0.96		3
						R.EGSVSGNDILK.V	1173.6241	0.91		2
						K.NLDKDVYETNVYSFTK.A	2020.0234	0.00		2
			WP_009888725.1	4Fe-4S dicluster domain-containing protein	4Fe-4S			0.95	0.00	2
						R.GFGAAGGLTK.A	933.5284	0.95		2
						K.CSNEDIDDASIFGR.G	1625.6992	0.00		2
			WP_009893687.1	YggS family pyridoxal phosphate-dependent enzyme	YggS			0.95	0.06	2
						K.EITLLAVTK.T	1042.6638	0.93		2
						K.TVDVDLVNEAMR.E	1388.697	1.05		2
						R.VGTSIFGER.N	992.5291	0.95		2
						K.GLM(15.995)TM(15.995)APFIEDEDEIR.G	347.1879	0.00		2
						K.GLMTM(15.995)APFIEDEDEIR.G	579.276	0.00		2
						K.GLMTMAPFIEDEDEIR.G	1894.8886	0.00		2
						K.TVDVDLVNEAM(15.995)R.E	1232.5959	0.00		2
						R.EGITSVGENKPQELAR.K	1782.9476	0.00		3
						R.IALCEEIQK.R	1158.6318	0.00		2
						R.IALCEEIQKR.A	1314.733	0.00		3
			WP_009898301.1	phosphopyruvate hydratase	phosphopyruvate			0.95	0.08	23
						K.GIENGVANSILVK.V	1368.7977	0.95		2
						K.RAGYTAVISHR.S	1257.6942	0.93		3
						R.IEEMVGEQAR.Y	1188.5809	1.07		2
						C.GVGDEGGFAPNLGSNR.E	1573.7485	0.00		2
						K.GLACGVGDEGGFAPNLGSNR.E	1975.9251	0.00		2
						K.LQLVGDDLFVTNTER.L	1746.9152	0.00		2
						K.VNQIGTITETLDAIEM(15.995)AK.R	1774.9023	0.00		3
						R.AIVPSGASTGAFEAVELR.D	1801.9574	0.00		2
						R.AIVPSGASTGAFEAVELR.D	1801.9574	0.00		3
						R.SGETEDSTIADLAVAVNAGQIK.T	2245.1519	0.00		2
						R.SGETEDSTIADLAVAVNAGQIK.T	2245.1519	0.00		3
			WP_009902118.1	anaerobic carbon-monoxide dehydrogenase catalytic subunit	anaerobic			0.95	0.11	2
						K.AQCGFGLQGVCCR.I	1539.6745	0.87		2
						Q.CGFGLQGVCCR.I	1340.5788	1.03		2
						R.GLCGADEHTIVGR.N	1411.6878	0.00		3
			WP_009902542.1	lactate utilization protein	lactate			0.95	0.11	2
						K.IKVILVGENLGL.-	1322.8537	0.77		2
						K.VILVGENLGL.-	1053.6434	0.95		2
						R.TIASPAVVQR.F	1068.6291	1.04		2
						R.VAAMIFGPK.N	988.578	0.95		2
						K.NVIVVAGMNK.I	1099.6424	0.00		2
						R.YFDAYYCK.T	1184.5212	0.00		2
			contaminant_KERATIN05	no description	no			0.95	0.01	2
						K.VTMQNLNDR.L	1117.555	0.96		2
						R.LAADDFR.T	834.4236	0.94		2
						R.ALEEANADLEVK.I	1356.7137	0.00		2
						R.GQVGGDVNVEM(15.995)DAAPGVDLSR.I	1131.523	0.00		2
						R.LLEGEDAHLSSSQFSSGSQSSR.D	2337.0914	0.00		3
			contaminant_KERATIN08	no description	no			0.95	0.01	2
						K.VTMQNLNDR.L	1117.555	0.96		2
						R.LAADDFR.T	834.4236	0.94		2
						R.ALEEANADLEVK.I	1356.7137	0.00		2
						R.LLEGEDAHLSSQQASGQSYSSR.E	2378.118	0.00		3
			WP_003418513.1	rubrerythrin family protein	rubrerythrin			0.96	0.07	23
						K.AYFNIKAENY.-	1287.6499	0.89		2
						K.LLENLNEGK.I	1084.6128	0.91		2
						K.NLMAGFAGESEAR.N	1379.6504	1.04		2
						K.TEKNLMAGFAGESEAR.N	1765.8669	1.01		3
						K.NLM(15.995)AGFAGESEAR.N	404.2093	0.00		2
						K.TEKNLM(15.995)AGFAGESEAR.N	790.4259	0.00		3
						K.TEKNLMAGFAGESEAR.N	1765.8669	0.00		2
						R.NKYTYYASK.A	1220.6441	0.00		2
						R.NKYTYYASK.A	1220.6441	0.00		3
			WP_003420701.1	phosphate butyryltransferase	phosphate			0.96	0.00	2
						K.ALVFFSK.S	866.5266	0.96		2
						K.IANAILVGDIEK.T	1310.781	0.00		2
			WP_003420710.1	MFS transporter	MFS			0.96	0.04	23
						K.YFNCDTQEAAHGR.A	1595.6787	0.96		2
						K.YFNCDTQEAAHGR.A	1595.6787	0.95		3
						R.APAAATGIK.R	854.5226	0.88		2
						R.DNMIPYYPLGNFK.N	1626.8116	0.94		2
						R.NAETQGYPIR.V	1175.5935	1.01		2
						R.VAVDTPAHVR.Q	1091.6087	0.96		2
						K.ITTIFVNNTTYGM(15.995)TGGQM(15.995)APTTLVGQR.A	1501.7487	0.00		2
						K.ITTIFVNNTTYGM(15.995)TGGQM(15.995)APTTLVGQR.A	1501.7487	0.00		3
						K.ITTIFVNNTTYGM(15.995)TGGQMAPTTLVGQR.A	1501.7487	0.00		3
						K.NVEVEEVK.-	1000.5441	0.00		2
						K.TEGLQDTQTHYCPGCTHGIIHR.L	2609.1945	0.00		4
						K.TEGLQDTQTHYCPGCTHGIIHR.L	2609.1945	0.00		5
						K.YFNCDTQEAAHGRAPAAATGIK.R	2405.1627	0.00		4
						R.DNM(15.995)IPYYPLGNFK.N	406.1522	0.00		2
						R.DNMIPYYPLGNFK.N	1626.8116	0.00		3
						R.VSEM(15.995)LATLTGAVFVER.V	492.2254	0.00		2
						R.VSEM(15.995)LATLTGAVFVER.V	492.2254	0.00		3
			WP_003421175.1	30S ribosomal protein S10	30S			0.96	0.00	2
						R.LIDIANPTPK.T	1136.6805	0.96		2
						K.AGSQVSGPVPLPTEK.Q	1521.8403	0.00		2
			WP_003423380.1	carbonic anhydrase	carbonic			0.96	0.02	23
						K.IVVLSCMDTR.L	1220.6257	0.99		2
						K.NAGATIMHPFGSIMR.S	1629.812	0.97		3
						R.GISNDVILTLR.S	1227.7187	0.94		2
						R.LTELLPK.A	868.5634	0.94		2
						K.IVVLSCM(15.995)DTR.L	848.45	0.00		2
						K.SFVENKEYEQYVTSK.H	1934.9707	0.00		3
			WP_003424455.1	response regulator transcription factor	response			0.96	0.1	23
						K.ALIEKYPQVITR.E	1485.8919	0.89		3
						K.GIGYTLEKDI.-	1163.6438	1.03		2
						K.ALIEKYPQVITR.E	1485.8919	0.00		2
						K.TINDKFIVFEK.L	1436.8279	0.00		3
			WP_003429271.1	PLP-dependent aminotransferase family protein	PLP-dependent			0.96	7.78	23
						K.MIYVIPDFQNPTGR.T	1677.8549	0.99		2
						K.MIYVIPDFQNPTGR.T	1677.8549	0.92		3
						K.MIYVIPDFQNPTGRT.W	1778.9025	20		2
						K.QGADLQASTISQMEVSK.F	1847.9299	0.83		2
						K.VSVAVLEENGR.S	1199.651	0.85		2
						R.SAMQYTTTEGYEPLREK.I	2059.9966	1.18		3
						K.GLVIFLGTFSK.I	1236.7482	0.00		2
						K.M(15.995)IYVIPDFQNPTGR.T	177.0824	0.00		2
						K.NVAYVAGGGFFPNGGR.E	1609.8001	0.00		2
						K.QGADLQASTISQMEVSK.F	1847.9299	0.00		3
						K.TNVNKDDILVTSGSQQGLDFAGK.V	2491.2999	0.00		3
						R.SAM(15.995)QYTTTEGYEPLREK.I	335.1515	0.00		3
						R.SAMQYTTTEGYEPLR.E	1773.8244	0.00		2
						R.SAMQYTTTEGYEPLREK.I	2059.9966	0.00		2
			WP_003429730.1	50S ribosomal protein L20	50S			0.96	0.00	2
						K.MLSEMAIQDPEGFAK.L	1721.8368	0.96		2
						K.M(15.995)LSEM(15.995)AIQDPEGFAK.L	177.0824	0.00		2
						K.M(15.995)LSEMAIQDPEGFAK.L	177.0824	0.00		2
						K.MLSEM(15.995)AIQDPEGFAK.L	637.2815	0.00		2
			WP_003431048.1	bis(5-nucleosyl)-tetraphosphatase (symmetrical) YqeK	bis(5-nucleosyl)-tetraphosphatase			0.96	0.01	23
						-.MNLENINQR.L	1158.5815	0.95		2
						K.AYLAGMIHDCAK.Y	1404.6894	0.97		3
						K.LCEIYGCDKEK.A	1497.7207	0.00		3
			WP_003434098.1	pyrroline-5-carboxylate reductase	pyrroline-5-carboxylate			0.96	0.13	23
						K.AICACIEK.S	1019.5144	0.87		2
						K.FASQAVMGSAK.M	1151.6009	0.96		2
						K.SIKDIESIIGEDKK.I	1685.9815	1.13		3
						K.DMVCSPGGTTIEAVK.V	1619.7899	0.00		2
						K.FASQAVM(15.995)GSAK.M	780.384	0.00		2
						K.LVEPNMVIASAYSQGTLDR.I	2092.0704	0.00		3
						K.SIKDIESIIGEDKK.I	1685.9815	0.00		4
						R.IDANFGINTTK.D	1248.6714	0.00		2
			WP_003435816.1	DUF1847 domain-containing protein	DUF1847			0.96	0.05	23
						K.IAYNAGLVEAEGYCQYTR.L	2105.9922	0.95		2
						K.IAYNAGLVEAEGYCQYTR.L	2105.9922	0.96		3
						K.STIGLEASQTISK.C	1389.7715	1.04		2
						K.AKQLYEEEENRK.I	1619.8519	0.00		3
						K.AKQLYEEEENRK.I	1619.8519	0.00		4
						K.CSDEVM(15.995)CNPIGQALFLNEAK.V	767.283	0.00		2
						K.CSDEVM(15.995)CNPIGQALFLNEAK.V	767.283	0.00		3
						K.CSDEVMCNPIGQALFLNEAK.V	2352.0993	0.00		2
						K.QLYEEEENRK.I	1392.6885	0.00		3
						K.YMEAPITTLVVK.D	1419.8047	0.00		2
			WP_003436878.1	HD domain-containing protein	HD			0.96	0.00	3
						R.AILGHHDGMGVTR.T	1390.714	0.96		3
						-.MREEALEILFK.Y	1433.7952	0.00		3
						K.HCYAVEAVMR.E	1262.59	0.00		2
						K.KENFGDEEMYR.A	1472.6606	0.00		3
						K.NISDVLESAENN.-	1331.6205	0.00		2
						R.AILGHHDGM(15.995)GVTR.T	977.4753	0.00		3
						R.AILGHHDGMGVTR.T	1390.714	0.00		2
						R.KHCYAVEAVMR.E	1418.7163	0.00		3
			WP_003436909.1	bifunctional enoyl-CoA hydratase/phosphate acetyltransferase	bifunctional			0.96	0.00	2
						R.NIITPILVGNEGK.I	1422.8446	0.96		2
						K.LLITTDGGM(15.995)NIAPDYEQK.A	947.4998	0.00		2
			WP_004454137.1	MBL fold metallo-hydrolase	MBL			0.96	0	23
						R.TDLYSGDFNQMEK.S	1602.7236	0.96		2
						R.VYPGHGPTSTLGVEK.K	1596.8512	0.96		3
						K.FVDSYFGVNTYVLGDEK.T	2008.9863	0.00		2
						K.NLSYTMR.C	911.4535	0.00		2
						R.TDLYSGDFNQM(15.995)EK.S	1317.5547	0.00		2
						R.TDLYSGDFNQM(15.995)EK.S	1317.5547	0.00		3
						R.VEDEM(15.995)FTGDTLFAGSIGR.T	649.2629	0.00		2
						R.VEDEMFTGDTLFAGSIGR.T	1972.9282	0.00		2
						R.VYPGHGPTSTLGVEK.K	1596.8512	0.00		2
						R.VYPGHGPTSTLGVEKK.T	1752.9774	0.00		4
			WP_009892113.1	thymidylate kinase	thymidylate			0.96	0.16	2
						K.ATQTEILYER.L	1250.6507	1.07		2
						K.LIIIESGSDASGK.A	1344.7501	0.85		2
						K.NASDVDPYIASTFFTADR.Y	2017.9462	0.00		2
			WP_009892132.1	GntR family transcriptional regulator	GntR			0.96	0.12	23
						K.AEQFMIDK.A	1036.5263	0.76		2
						R.ASLEGLAAYLAAER.I	1461.7827	0.98		2
						R.ASLEGLAAYLAAER.I	1461.7827	0.95		3
						R.DVVFENLR.E	1018.5447	1.03		2
						K.LNLDNYKPLR.D	1300.7503	0.00		3
						R.ISDEDIKK.L	1030.591	0.00		2
			WP_009895750.1	cell division protein ZapA	cell			0.96	0.03	23
						R.ATIAENLASEFQNK.A	1590.8253	0.98		2
						R.ATIAENLASEFQNK.A	1590.8253	0.94		3
						K.AYDLQLK.C	905.5222	0.00		2
						K.IHGAEYPMVGDKSEK.F	1743.8866	0.00		3
						K.VGASNEELQLEIK.S	1484.8086	0.00		2
			WP_009897862.1	pyruvate:ferredoxin (flavodoxin) oxidoreductase	pyruvate:ferredoxin			0.96	0.04	23
						K.ATPAAAMAK.F	886.4946	0.95		2
						K.LAEIIPEEDAVK.Y	1381.7705	0.99		2
						K.TVFDNLVSEQPK.N	1431.761	0.97		2
						K.VAGELLPGVFHVSAR.A	1578.8882	0.94		3
						R.ALASQALSIFGDHQDVMAAR.Q	2129.0769	0.93		3
						R.GTAQNPDIYFQTR.E	1537.7525	1.03		2
						K.LGQEIGLGNR.I	1083.6037	0.00		2
						K.QFPEEADGLFAK.A	1406.7082	0.00		2
						R.ALASQALSIFGDHQDVM(15.995)AAR.Q	1829.8982	0.00		3
						R.INMIMQSAFFK.L	1384.7247	0.00		2
			WP_009897956.1	cell wall-binding protein Cwp2	cell			0.96	0.08	24
						K.IYIVGGESAVSNTAK.K	1563.8508	0.88		2
						K.TDITDSQK.N	962.492	0.96		2
						K.YTDNIVIVNSNK.L	1434.7718	0.96		2
						K.YTGGSQVGQPIYEIK.V	1694.8879	1.06		2
						R.LAGDDRHMTSVAVAK.A	1625.8559	0.87		4
						K.APIIVNGWNDLSADAIK.L	1853.0128	0.00		2
						K.GEADAM(15.995)SIAAK.A	620.2476	0.00		2
						K.LVDGLAATPLAQSK.K	1438.8395	0.00		3
						K.NSDLNTVSPQDLYDGYR.L	1984.9208	0.00		2
						K.VIETYYGKLDK.L	1411.7963	0.00		3
			WP_009901929.1	ABC transporter ATP-binding protein	ABC			0.96	0.01	2
						K.VTALNNVNLSVQK.G	1454.8457	0.97		2
						R.IVTMEDGVIVSEK.V	1474.7953	0.95		2
						K.GDFVSIVGASGSGK.S	1335.7034	0.00		2
						R.IVTM(15.995)EDGVIVSEK.V	490.2825	0.00		2
			WP_009901962.1	hypothetical protein	hypothetical			0.96	0.08	234
						K.DGVFDPGENSVGLSIDGIGR.A	2031.9943	0.99		2
						K.FFEILNNVGIK.T	1348.7755	0.98		2
						K.GLELYDIK.F	1005.5747	0.96		2
						K.ISNIVRDTIAEK.G	1413.8191	0.98		2
						K.ISNIVRDTIAEK.G	1413.8191	0.87		3
						K.THYVSANLEEATMEVLPAK.V	2159.1014	1.02		2
						K.THYVSANLEEATMEVLPAK.V	2159.1014	0.96		3
						K.THYVSANLEEATMEVLPAK.V	2159.1014	0.97		4
						K.TKDVFELDNGNYLLK.F	1853.0016	0.92		2
						K.TKDVFELDNGNYLLK.F	1853.0016	0.94		3
						K.VFGNGLEVICR.Y	1290.6754	0.98		2
						R.ANLETSVK.F	916.5229	0.9		2
						R.AVGSFLRR.Y	932.5556	0.96		2
						R.RYGSCVEEGAK.L	1310.6289	0.68		3
						K.DVFELDNGNYLLK.F	1594.8243	0.00		2
						K.GLELYDIKFEFGFYNDEVILIDEIASGNM(15.995)R.V	3411.6747	0.00		3
						K.THYVSANLEEATM(15.995)EVLPAK.V	1492.6868	0.00		2
						K.THYVSANLEEATM(15.995)EVLPAK.V	1492.6868	0.00		3
						K.THYVSANLEEATM(15.995)EVLPAK.V	1492.6868	0.00		4
						R.VYKDGVIVDPM(15.995)DLTALLLDK.-	1290.6894	0.00		3
						R.VYKDGVIVDPMDLTALLLDK.-	2302.2939	0.00		3
						R.YGSCVEEGAK.L	1154.5278	0.00		2
						V.SANLEEATMEVLPAK.V	1657.8597	0.00		2
			WP_009902717.1	radical SAM protein	radical			0.96	0.00	2
						K.IGVETFDNYFR.N	1387.6772	0.96		2
						-.MDRYSEITNKNQR.E	1709.8519	0.00		3
			contaminant_KERATIN03	no description	no			0.96	0.14	23
						K.GSLGGGFSSGGFSGGSFSR.G	1734.7962	0.99		2
						K.IRLENEIQTYR.S	1461.794	0.92		3
						K.NHEEEMKDLR.N	1355.6504	0.89		3
						K.QSLEASLAETEGR.Y	1417.7049	0.95		2
						K.VTMQNLNDR.L	1117.555	0.96		2
						L.GGGFSSGGFSGGSFSR.G	1477.6586	1.03		2
						R.AETECQNTEYQQLLDIK.I	2139.0235	0.54		2
						R.ALEESNYELEGK.I	1436.7035	0.87		2
						R.LAADDFR.L	834.4236	0.94		2
						R.LKYENEVALR.Q	1289.7343	1.06		2
						R.LKYENEVALR.Q	1289.7343	1.07		3
						R.SLLEGEGSSGGGGR.G	1289.6212	1.1		2
						R.SQYEQLAEQNRK.D	1548.7896	1.03		3
						R.VLDELTLTK.A	1086.6536	0.88		2
						K.HYSSSRSGGGGGGGGCGGGGGVSSLR.I	2295.024	0.00		3
						R.SQYEQLAEQNRK.D	1548.7896	0.00		2
			contaminant_KERATIN22	no description	no			0.96	0.09	23
						K.AQYEEIAQR.S	1134.5669	0.97		2
						K.GGSISGGGYGSGGGK.H	1252.6048	0.96		2
						R.FLEQQNQVLQTK.W	1530.8406	0.92		2
						R.GFSSGSAVVSGGSR.R	1281.6313	0.99		2
						R.GFSSGSAVVSGGSRR.S	1437.7324	0.79		3
						R.HGGGGGGFGGGGFGSR.S	1347.6068	1.09		3
						R.NLDLDSIIAEVK.A	1384.7814	1.06		2
						R.TAAENDFVTLK.K	1263.6711	0.95		2
						K.AAFGGSGGRGSSSGGGYSSGSSSYGSGGR.Q	2529.0946	0.00		3
						K.HSSGGGSRGGSSSGGGYGSGGGGSSSVK.G	2370.0626	0.00		3
						K.NVQDAIADAEQR.G	1356.6634	0.00		2
						R.GGSGGGGSISGGGYGSGGGSGGR.Y	1768.7725	0.00		2
						R.GSSSGGGYSSGSSSYGSGGR.Q	1767.7296	0.00		2
						R.TAAENDFVTLKK.D	1419.7973	0.00		2
						R.TAAENDFVTLKK.D	1419.7973	0.00		3
						R.YLDGLTAER.T	1064.5502	0.00		2
			WP_003420702.1	butyrate kinase	butyrate			0.97	0.09	23
						K.ILTINPGSTSTK.I	1286.7446	0.83		2
						K.IVDVANALDGEGPFSPER.S	1913.9564	0.97		2
						K.IVDVANALDGEGPFSPER.S	1913.9564	0.96		3
						K.TSELDAVVGR.G	1073.5717	1.06		2
						R.VLTGEEEAQVYDN.-	1493.6886	1.05		2
						R.ASVVHALNQK.A	1121.6557	0.00		2
			WP_003420866.1	NAD-specific glutamate dehydrogenase	NAD-specific			0.97	0.04	23
						K.GGIIVDPSTLSQGELER.L	1797.9472	0.98		2
						K.IKEEYNVTMR.E	1337.7013	0.9		3
						K.LVCEAANGPTTPEADEVFAER.G	2304.0773	0.97		2
						K.LVCEAANGPTTPEADEVFAER.G	2304.0773	1		3
						R.GYIDGIYK.L	983.5328	0.91		2
						K.AKLVCEAANGPTTPEADEVFAER.G	2531.2407	0.00		3
						K.CSVTGIPYGGGK.G	1250.6329	0.00		2
						K.IAVQGIGNVGSYTVLNCEK.L	2078.0911	0.00		2
						R.TAATGFGVAVTAR.E	1248.6826	0.00		2
						R.TAATGFGVAVTARE.A	1377.7252	0.00		2
			WP_003421121.1	30S ribosomal protein S4	30S			0.97	0.13	234
						K.AGENLLSLLER.R	1241.698	0.97		2
						K.FKNLVEVNSR.I	1260.719	0.9		2
						K.FKNLVEVNSR.I	1260.719	0.93		3
						K.KVSNYGLQLR.E	1232.7241	0.95		2
						K.KVSNYGLQLR.E	1232.7241	1.08		3
						K.NLVEVNSR.I	957.5243	0.98		2
						K.RNYAPGQHGQGR.K	1367.6807	1.09		3
						K.VDIPSLIVK.V	1038.6689	0.94		2
						K.VGDVIEVK.E	913.5484	0.92		2
						K.VGDVIEVKEK.S	1198.7173	0.92		2
						K.VGDVIEVKEK.S	1198.7173	1.05		3
						K.VSNYGLQLR.E	1076.5978	0.98		2
						K.VVGVPTREDIDLEIAEHLIIELYSK.-	2907.6038	0.54		3
						K.VVGVPTREDIDLEIAEHLIIELYSK.-	2907.6038	0.73		4
						K.WLEANVEGMTAK.V	1403.7119	1.02		2
						R.AENMPGK.A	801.4055	1.13		2
						R.IYGVLETQFR.N	1252.6816	0.94		2
						R.KKVSNYGLQLR.E	1388.8504	0.98		2
						R.KKVSNYGLQLR.E	1388.8504	0.92		3
						R.NYAPGQHGQGR.K	1211.5796	0.99		2
						R.NYAPGQHGQGR.K	1211.5796	1.01		3
						K.WLEANVEGM(15.995)TAK.V	1075.5008	0.00		2
						R.AENMPGKAGENLLSLLER.R	1998.0649	0.00		3
						R.CYTDKCAIVKR.N	1496.7843	0.00		3
						R.NLYERAENMPGK.A	1476.7395	0.00		2
			WP_003421197.1	FAD-dependent thymidylate synthase	FAD-dependent			0.97	0.04	23
						R.NLAVEMLR.E	972.5426	0.97		2
						R.SLFNFFEHR.C	1223.6087	1.04		3
						R.YVFPNACETK.M	1283.622	0.96		2
						K.TGPSCVNGSCPEGTM(15.995)TCGDIVQVR.E	1580.6269	0.00		2
						K.TGPSCVNGSCPEGTM(15.995)TCGDIVQVR.E	1580.6269	0.00		3
						K.TGPSCVNGSCPEGTMTCGDIVQVR.E	2610.1376	0.00		2
						K.TGPSCVNGSCPEGTMTCGDIVQVR.E	2610.1376	0.00		3
			WP_003421448.1	ribose-phosphate pyrophosphokinase	ribose-phosphate			0.97	0.08	2
						K.LVANLITAAGADR.V	1311.7511	0.91		2
						K.TVAPLFGDAIR.M	1186.671	1.03		2
						R.ITAVIPYYGYAR.Q	1413.7656	0.00		2
			WP_003425288.1	amidophosphoribosyltransferase	amidophosphoribosyltransferase			0.97	0.06	23
						K.ACFDGEYPVK.K	1240.5798	1.01		2
						R.ITSPPVAYSCYYGIDTPNR.S	2202.0497	0.93		2
						R.ITSPPVAYSCYYGIDTPNR.S	2202.0497	0.93		3
						R.YSTAGGSHVSNCQPLVGSCR.K	2164.9823	1.05		3
						K.IKLNPLSTIIK.G	1322.8901	0.00		3
						R.GQESCGLALLDDGEIK.Y	1759.8662	0.00		2
						R.NDATIDNVNAYEFR.I	1668.7744	0.00		2
						R.TFIKPTQEER.E	1303.7136	0.00		3
			WP_003427760.1	electron transfer flavoprotein subunit beta/FixA family pro	electron			0.97	0.18	23
						K.QVPDTNEVR.I	1084.5513	1.01		2
						K.VGDYDIIFAGR.Q	1252.6452	1		2
						K.VSTPVLLTAVK.E	1182.7588	0.94		2
						K.VWTIDDLDVNKEEVGLK.A	2057.1126	0.53		3
						R.AFGGADTWATSNTIAAGISK.V	1995.0143	0.91		2
						R.QAIDGDTAQVGPQIAEK.L	1795.9316	1.06		2
						R.QLEDGYELIK.V	1262.6758	0.87		2
						R.SFTPEPR.G	860.4392	1.12		2
						R.ECLAM(15.995)GADDAILLSDR.A	650.2768	0.00		2
						R.ECLAMGADDAILLSDR.A	1776.8386	0.00		2
			WP_003431170.1	guanylate kinase	guanylate			0.97	0.15	234
						K.AAIMECLEK.G	1119.5668	1.02		2
						K.GLLLVVSGPSGAGK.G	1309.7969	0.97		2
						R.GTETEAEIEKR.F	1317.6776	0.66		3
						R.IVGRGTETEAEIEKR.F	1742.9527	1		4
						R.TGEVDGVNYFFISK.E	1630.8243	0.94		2
						K.ELLKENDTIK.L	1285.7493	0.00		2
						K.GQDVLLEIEM(15.995)QGAK.Q	1173.5951	0.00		2
						R.GTETEAEIEK.R	1161.5765	0.00		2
			WP_003432205.1	amino acid ABC transporter ATP-binding protein	amino			0.97	0.1	23
						K.DSYPSQLSGGQK.Q	1321.6514	0.85		2
						K.EGMTMAIVTHEMGFAK.E	1807.8671	1.03		3
						K.SFGDLNVLK.N	1047.5964	1.05		2
						K.TILDNITLAPIK.L	1366.8436	0.91		2
			WP_003436178.1	elongation factor G	elongation			0.97	0.1	23
						K.GGVEPQSENVWR.Q	1384.6735	0.99		2
						R.ILFYTGQTHK.I	1262.7023	0.97		3
						R.VAPQEPGEGYK.F	1229.6292	0.81		2
						K.TVGGSVPK.E	799.4804	0.00		2
						R.QAETYGVPR.I	1047.5349	0.00		2
						R.VYSGTLESGSYVLNATK.N	1844.9601	0.00		2
			WP_003436372.1	ABC transporter ATP-binding protein	ABC			0.97	0.00	2
						R.NASIYILDEPIGGVDPAAR.S	1999.0456	0.97		2
			WP_003436678.1	imidazole glycerol phosphate synthase subunit HisH	imidazole			0.97	0.13	2
						K.SGEVGLNILR.A	1084.6241	1.06		2
						K.SYEYGEYEGLGLIK.G	1675.8345	0.87		2
			WP_009891688.1	hypoxanthine phosphoribosyltransferase	hypoxanthine			0.97	0.02	2
						R.NINLPLR.V	866.5338	0.97		2
						R.NVPYIFNVTDEDR.-	1608.7784	1		2
						R.VNFMTTSSYGNNEESTGK.V	2021.9081	0.96		2
						K.HLKAKNPASLKCCVLLDK.P	2235.304	0.00		3
						R.VNFMTTSSYGNNEESTGKVK.V	2277.1028	0.00		3
			WP_009901935.1	response regulator transcription factor	response			0.97	0.00	2
						K.AYLDNVEVPLTAGEYK.L	1837.9543	0.97		2
			WP_009902568.1	ATP phosphoribosyltransferase	ATP			0.97	0.00	2
						K.MGLGDSIDTDTR.K	1307.6027	0.97		2
			WP_003416253.1	zinc metallopeptidase	zinc			0.98	0.01	23
						R.AIVQLGNLGIIDESESR.Q	1840.9894	0.99		2
						R.AIVQLGNLGIIDESESR.Q	1840.9894	0.97		3
						R.VLDSNGLYDVK.I	1277.6867	0.00		2
			WP_003417102.1	ATP-dependent Clp endopeptidase proteolytic subunit ClpP	ATP-dependent			0.98	0.11	23
						K.ETLNEILSER.T	1230.6456	1.09		2
						K.EYGLIDEVFTKRP.-	1621.8716	0.91		3
						K.IKETLNEILSER.T	1499.8559	0.8		2
						K.IKETLNEILSER.T	1499.8559	0.88		3
						M.ALVPVVVEQTGR.G	1294.7609	0.99		2
						M.ALVPVVVEQTGRGER.S	1636.9261	1.01		2
						R.SYDIFSR.L	914.4498	1.14		2
						R.TGQPLEK.I	827.4753	0.96		2
						K.EYGLIDEVFTK.R	1368.7177	0.00		2
						K.EYGLIDEVFTKRP.-	1621.8716	0.00		2
						K.IKMDTERDNFMSALEAK.E	2083.0523	0.00		4
						K.MDTERDNFMSALEAK.E	1812.8386	0.00		3
						R.DNFMSALEAK.E	1180.5798	0.00		2
			WP_003417347.1	electron transfer flavoprotein subunit alpha/FixB family pr	electron			0.98	0.09	23
						K.IAPVVIELLGEGR.K	1392.8341	0.98		2
						K.IAPVVIELLGEGRK.L	1548.9603	0.86		3
						K.NVWIFAEQR.E	1189.6244	1.1		2
						R.TGEVIALDYK.I	1163.6438	0.97		2
						R.TTVLETVK.T	945.5747	1.01		2
			WP_003419125.1	enoyl- enoyl-	enoyl-			0.98	0.03	23
						K.VIPVVPTIALAQR.M	1403.8864	0.96		2
						K.VIPVVPTIALAQR.M	1403.8864	1		3
						R.FICSEECSVHSNYK.N	1814.7968	0.00		3
			WP_003421163.1	30S ribosomal protein S3	30S			0.98	0.11	2
						R.ADIDYGFAEADTTYGK.I	1791.8203	0.9		2
						R.TEGYSEGNVPLQTLR.A	1690.8526	1.06		2
			WP_003421187.1	50S ribosomal protein L10	50S			0.98	0.09	23
						K.APVSNFAYLIDAIAK.K	1647.9236	0.94		2
						K.GFMDSHPK.M	973.4691	0.92		2
						K.GLTVEEVTELRK.Q	1428.8188	0.98		3
						K.IVEMANIPSR.E	1156.6274	0.98		2
						K.IVEMANIPSREVLIAK.L	1839.0733	0.85		3
						K.MGIVEGAFYDESK.I	1500.717	1.13		2
						K.SEVVSEIVEK.L	1173.6493	0.99		2
						K.SEVVSEIVEKLQK.S	1570.9182	1.07		3
						K.SSAAVVVDYK.G	1093.6019	1		2
						N.AIAFGYDDPVAPAR.I	1489.7565	1.06		2
						R.EAGVDYKVYK.N	1254.686	0.85		2
						R.EAGVDYKVYK.N	1254.686	0.89		3
						K.APVSNFAYLIDAIAK.K	1647.9236	0.00		3
						K.GLTVEEVTELRK.Q	1428.8188	0.00		2
						K.M(15.995)GIVEGAFYDESK.I	177.0824	0.00		2
			WP_003421367.1	F0F1 ATP synthase subunit alpha	F0F1			0.98	0.13	2
						R.IVEVPVGEALIGR.V	1378.8184	0.88		2
						R.SVYEPLQTGIK.S	1289.7231	1.07		2
						R.STIAQLVSSLEK.G	1330.7708	0.00		2
			WP_003429565.1	phosphoglycerate kinase	phosphoglycerate			0.98	0.1	23
						K.EVVFAADDNVVGENAK.K	1731.8679	0.87		2
						K.GEAKPELSLAPVAK.R	1492.8865	1.11		3
						K.TIANFVK.T	847.5167	0.95		2
						R.AHCSTVGAGEFLQER.V	1688.7941	1.02		3
						K.EVVFAADDNVVGENAKK.A	1888.9976	0.00		3
						K.MENGDVVLLENTR.Y	1516.7555	0.00		2
						R.AHCSTVGAGEFLQER.V	1688.7941	0.00		2
			WP_003430159.1	NifB/NifX family molybdenum-iron cluster-binding protein	NifB/NifX			0.98	0.01	34
						K.LVEFPSDHTCSHDGCGHH.-	2119.867	0.97		3
						K.LVEFPSDHTCSHDGCGHH.-	2119.867	0.98		4
			WP_003431407.1	D-2-hydroxyacid dehydrogenase	D-2-hydroxyacid			0.98	0.12	23
						K.DGAYIVNTGR.G	1092.5564	1.1		2
						K.ILVFGAR.D	802.5065	1.03		2
						R.AAALDTFETEGLFLNK.K	1795.9437	0.84		3
						R.AAALDTFETEGLFLNKK.M	1952.07	0.83		3
						R.SITVGVIGTGK.I	1086.6649	1.07		2
						R.WIAELLGTEVR.S	1313.7343	0.92		2
						R.AAALDTFETEGLFLNK.K	1795.9437	0.00		2
						R.AAALDTFETEGLFLNKK.M	1952.07	0.00		2
			WP_003434235.1	protein jag	protein			0.98	0.05	2
						K.GFLGFIGAK.D	964.5746	0.94		2
						R.VLVDIENYR.S	1147.6237	1.01		2
			WP_003435194.1	ATP-dependent chaperone ClpB	ATP-dependent			0.98	0.03	23
						K.VYGEGADSQGVSATR.K	1523.7216	1.01		2
						R.GSQRVETQDPEGTYDALAR.Y	2121.0168	0.95		3
						R.VETQDPEGTYDALAR.Y	1691.8003	0.98		2
			WP_003435562.1	serine--tRNA ligase	serine--tRNA			0.98	8.52	23
						K.MEYTLMR.I	970.4616	0.97		2
						K.YCAYTPCFR.S	1264.5369	1.02		2
						R.IPNVPHPEVPQGETDEDNVQIR.T	2511.2435	0.98		3
						R.IRENLDDIKK.A	1326.7871	0.8		3
						R.LKELSDKIK.G	1184.7744	20		3
						R.SLMNFFLNTHTAK.H	1578.8228	0.00		3
			WP_003435635.1	glucose-6-phosphate isomerase	glucose-6-phosphate			0.98	0.00	2
						K.SGTTTEPALAFR.I	1277.6616	0.98		2
						R.AAIDMVSHSFR.N	1260.6285	0.00		3
			WP_004454389.1	2-hydroxyglutaryl-CoA dehydratase	2-hydroxyglutaryl-CoA			0.98	7.78	23
						-.MFSIGVDSGSVATK.G	1453.7487	0.99		2
						K.IIIPTGWSPK.S	1166.7063	0.85		2
						K.KVTEITCHTR.G	1299.6969	0.88		3
						K.STSMLAR.G	792.4164	20		2
						K.VVGTGYGR.G	835.4552	0.98		2
						R.GIYFLNK.N	909.5324	0.99		2
						-.M(15.995)FSIGVDSGSVATK.G	177.0824	0.00		2
						K.GVLFDGEK.I	919.5015	0.00		2
						K.KIIIPTGWSPK.S	1322.8326	0.00		3
						K.MIEEILGK.K	987.5675	0.00		2
						K.MIEEILGKK.I	1143.6937	0.00		2
						K.QVYELLSSEIDKK.D	1634.9131	0.00		3
						R.GEVIDEVAFTGGLAK.S	1560.8399	0.00		2
						R.GEVIDEVAFTGGLAK.S	1560.8399	0.00		3
						R.GVMDFADK.K	937.4579	0.00		2
						R.TILDVGGQDSK.V	1187.6398	0.00		2
			WP_009888460.1	response regulator transcription factor	response			0.98	0.00	2
						R.VFLASSYEEAVR.V	1397.7191	0.98		2
						R.VYVPIEEEELPVFK.L	1746.9525	0.00		2
			WP_009889023.1	elongation factor P	elongation			0.98	0.08	234
						-.MVSAGDFR.K	909.4378	0.99		2
						K.FLKENEVATIR.F	1374.7871	0.96		2
						K.FLKENEVATIR.F	1374.7871	0.97		3
						K.TGAIREESFNPSEK.F	1619.8155	1.06		3
						K.TGAIREESFNPSEKFPK.A	2021.0663	0.88		4
						R.TGEYLSRV.-	951.5025	1.11		2
						K.TGAIREESFNPSEKFPK.A	2021.0663	0.00		3
			WP_009890976.1	polysaccharide deacetylase family protein	polysaccharide			0.98	0.00	4
						R.TKENSIICLHDAGENSGGAVGAPER.T	2638.285	0.98		4
						R.TKENSIICLHDAGENSGGAVGAPER.T	2638.285	0.00		3
			WP_009893498.1	GNAT family N-acetyltransferase	GNAT			0.98	0.00	2
						R.MDDLDTIAK.F	1076.5424	0.98		2
			WP_009896192.1	cysteine desulfurase NifS	cysteine			0.98	0.05	23
						K.GVGALYIR.K	875.5229	1.02		2
						R.LHNFVHGGAQEK.S	1391.731	0.95		3
						K.ENMQNHVETLTR.L	1498.7198	0.00		3
						R.AGTENIPAIVGYGK.A	1444.7926	0.00		2
			WP_009896932.1	response regulator transcription factor	response			0.98	0.00	2
						R.EGYEIVEAGTGR.E	1307.6357	0.98		2
						K.EIELTPTEFSIVK.Y	1560.8651	0.00		2
						R.EGYEIVEAGTGREAIEK.M	1906.9717	0.00		2
			WP_009898446.1	pyrroline-5-carboxylate reductase	pyrroline-5-carboxylate			0.98	0.07	23
						K.FASQAVMGSAK.M	1151.6009	0.96		2
						K.NSNVTDEELNMIK.A	1561.7658	0.91		2
						K.TIESLESFIGSDK.K	1480.7661	0.99		2
						K.TIESLESFIGSDKK.I	1636.8924	1		3
						R.VMPNTPALVGEGMSALCK.N	1930.976	1.01		2
						R.VMPNTPALVGEGMSALCK.N	1930.976	0.84		3
						K.AEDITVSDLSQVALDK.V	1758.9251	0.00		2
						K.FASQAVM(15.995)GSAK.M	780.384	0.00		2
						K.NSNVTDEELNM(15.995)IK.A	1292.5555	0.00		2
						K.SIVACIDKSK.D	1203.6897	0.00		3
						R.VM(15.995)PNTPALVGEGMSALCK.N	276.1508	0.00		2
						R.VM(15.995)PNTPALVGEGMSALCK.N	276.1508	0.00		3
			WP_009901735.1	phosphoribosylformylglycinamidine synthase	phosphoribosylformylglycinamidine			0.98	0.21	2
						K.FVASEDVMR.E	1080.5274	0.96		2
						K.LGLVPYGEIR.V	1143.6652	1.01		2
						K.LVAIGGNYSTTR.L	1278.6932	0.67		2
						R.VFIPAFPGTNCEYDSAR.A	1971.923	1.18		2
						R.MEIGAVIAAAPK.E	1225.7104	0.00		2
						R.TTLEDTLPGK.L	1129.6231	0.00		2
						R.VQEAINEFLTQK.D	1474.8031	0.00		2
			WP_009902802.1	shikimate dehydrogenase	shikimate			0.98	0.11	23
						-.MNFFGLVGEK.L	1196.6264	0.93		2
						K.AALTYFIDSGIEK.L	1482.797	1.07		2
						K.AILIDYEELK.H	1261.717	0.84		2
						K.TCDGLYMLVGQAIK.S	1623.8364	1.16		2
						K.TCDGLYMLVGQAIK.S	1623.8364	0.98		3
						K.YLDFISPEAK.R	1237.6594	1.12		2
						R.AVNTILLR.E	926.5913	0.97		2
						K.AILIDYEELKHIK.G	1667.9862	0.00		4
						K.LLGIQGVNVTVPYK.E	1555.9338	0.00		2
						K.MANIDVQGK.V	1030.5481	0.00		2
						K.TCDGLYM(15.995)LVGQAIK.S	886.3565	0.00		2
						K.YLDFISPEAKR.I	1393.7606	0.00		3
			WP_009903412.1	SIS domain-containing protein	SIS			0.98	0.07	23
						K.SSNFGSSDFYK.Y	1293.5877	0.98		2
						K.TIAFTSNR.N	936.5029	1.06		2
						K.TMVDVMTTEMNAIR.C	1638.7779	1.02		2
						K.TMVDVMTTEMNAIR.C	1638.7779	0.99		3
						K.VIFMGVGK.S	905.5408	0.92		2
						K.YHPGGSLGEK.L	1099.5662	0.86		2
						K.TM(15.995)VDVM(15.995)TTEMNAIR.C	278.13	0.00		2
						K.TM(15.995)VDVMTTEMNAIR.C	278.13	0.00		2
						K.TM(15.995)VDVMTTEMNAIR.C	278.13	0.00		3
						K.TMVDVM(15.995)TTEM(15.995)NAIR.C	722.3343	0.00		2
						K.TMVDVM(15.995)TTEMNAIR.C	722.3343	0.00		2
						K.TMVDVMTTEM(15.995)NAIR.C	1184.5127	0.00		2
			WP_003419057.1	septum site-determining protein MinD	septum			0.99	0.29	23
						R.AIVVTNPEISAVR.D	1395.8086	1.01		2
						R.IVYDIVDVVEGTCR.L	1664.8444	0.49		2
						R.IVYDIVDVVEGTCR.L	1664.8444	0.99		3
						R.IIGLLEANEIKEIR.L	1666.0029	0.00		3
						R.NLDVVMGLENR.I	1286.6653	0.00		2
			WP_003420269.1	TerD family protein	TerD			0.99	0.05	23
						K.GQKVDLTK.G	971.6015	0.92		2
						R.QNFGQVSNSYIR.I	1439.7157	1.04		2
						R.RQNFGQVSNSYIR.I	1595.8168	0.99		2
						R.RQNFGQVSNSYIR.I	1595.8168	0.99		3
						R.TGEGDGDDEQIVVDLSK.I	1831.8687	0.95		2
						K.HTSGAVEHLGDNR.T	1419.6855	0.00		3
			WP_003420839.1	redox-sensing transcriptional repressor Rex	redox-sensing			0.99	0.02	23
						K.ALFDANPR.M	930.4923	0.99		2
						K.ELSDIIGFTASQIR.Q	1576.8461	0.95		2
						K.ELSDIIGFTASQIR.Q	1576.8461	0.99		3
						K.GVWNFAPLDLEVPK.G	1639.8974	0.99		2
						K.NGAQEVINR.V	1027.5411	0.96		2
						K.NISMAVIR.R	930.5321	1.01		2
						K.NNNIDIAVLCIPK.N	1538.8491	1.01		2
						K.IREFEVLDSDTLEDFIKNNNIDIAVLCIPK.N	3618.913	0.00		4
						R.QDLNNFGGFGQQGYGYNVEALHTEIGK.I	3012.4447	0.00		3
			WP_003428191.1	pyridoxamine kinase	pyridoxamine			0.99	0.03	23
						K.HSDLTTPNLTEACFLTGNDYTK.S	2554.2091	0.99		3
						K.KVAAINDLSGIGK.C	1368.8341	0.99		3
						K.SDYNRDELIYIAK.S	1654.8566	0.98		3
						K.VAAINDLSGIGK.C	1212.7078	0.99		2
						K.VNFDSIYSGFLGSK.H	1588.8137	0.91		2
						K.CSLSVAIPILSALK.V	1526.9106	0.00		2
			WP_003428415.1	transcription antitermination factor NusB	transcription			0.99	0.00	2
						K.VDVSILR.L	828.5069	0.99		2
						K.IYCDDKSPK.F	1208.6111	0.00		3
			WP_003430302.1	TerD family protein	TerD			0.99	0.08	23
						K.FNALGSGFEDGLAGLCK.N	1810.8924	0.96		2
						K.FNALGSGFEDGLAGLCK.N	1810.8924	1.05		3
						K.HASGAVEYMGDNR.T	1433.6358	1.14		2
						K.HASGAVEYMGDNR.T	1433.6358	1.11		3
						K.VTNDGDFIFYNNLK.H	1714.8566	0.93		2
						R.QNFGQVENSYIR.I	1481.7263	0.93		2
						R.RQNFGQVENSYIR.I	1637.8274	0.97		2
						R.RQNFGQVENSYIR.I	1637.8274	1.03		3
						R.TGVGDGDDEQINVDLSK.I	1816.8691	0.99		2
						R.TGVGDGDDEQINVDLSKIPQNIAK.I	2610.3582	0.00		3
			WP_003434506.1	dihydroorotate dehydrogenase electron transfer subunit	dihydroorotate			0.99	0.11	2
						K.MGQFYMLR.A	1072.5198	1.03		2
						K.VALVGGGIGVAPLYLVAK.N	1753.0947	0.99		2
						K.VVGEGTQILSNLK.V	1412.8239	0.82		2
						K.ILENIYIGEDMYR.M	1655.8229	0.00		2
						K.VALVGGGIGVAPLYLVAK.N	1753.0947	0.00		3
			WP_004454531.1	TerD family protein	TerD			0.99	0.03	23
						K.FSAVGAGFEGGLEALCR.N	1767.8614	0.96		2
						R.QNFGQVSNSYIR.V	1439.7157	1.04		2
						R.RQNFGQVSNSYIR.V	1595.8168	0.99		2
						R.RQNFGQVSNSYIR.V	1595.8168	0.99		3
						R.VLNSENDEEILR.Y	1457.7362	0.98		2
						K.FSAVGAGFEGGLEALCR.N	1767.8614	0.00		3
						R.TGEGDGDDEEILVNLETMPK.H	2218.0392	0.00		2
			WP_009890612.1	pyruvate, phosphate dikinase	pyruvate,			0.99	0.00	2
						K.YVYSFGEGSK.D	1191.5812	0.99		2
						K.GANLAEMTK.I	989.5216	0.00		2
			WP_009894741.1	hypothetical protein	hypothetical			0.99	0.00	2
						R.YIIGAPLIGQIGK.N	1397.8646	0.99		2
						K.IVYLECEDKPK.L	1476.7898	0.00		3
			WP_009903755.1	precorrin-3B C(17)-methyltransferase	precorrin-3B			0.99	0.09	2
						-.MIYVVGIGPGSK.D	1275.7261	1.05		2
						K.AIEDSEAIVGYK.T	1349.7079	0.92		2
			WP_009903855.1	16S rRNA (guanine(527)-N(7))-methyltransferase RsmG	16S			0.99	0.00	3
						R.VLELDNITFIHGR.A	1553.8566	0.99		3
			WP_011861888.1	D-proline reductase (dithiol) protein PrdB	D-proline			0.99	0.06	234
						K.GVAPMHYAFMGGGGNQHVFTEETGPAIAAK.L	3101.4933	1.06		4
						K.IVPLPYEYK.A	1176.6794	0.91		2
						R.AVAPLVPMGANAGEPHNIEMQTHILR.D	2794.4452	0.93		4
						R.DTLEQLVAIPSAGK.I	1496.845	0.96		2
						R.DTLEQLVAIPSAGK.I	1496.845	1.01		3
						R.FNLAGDTTFR.A	1168.5877	0.97		2
						R.LHELAAEGFIK.G	1282.7285	1.09		3
						R.TAVIVQR.A	813.5072	1.04		2
						K.GVAPM(15.995)HYAFM(15.995)GGGGNQHVFTEETGPAIAAK.L	501.2621	0.00		4
						K.GVAPM(15.995)HYAFMGGGGNQHVFTEETGPAIAAK.L	501.2621	0.00		4
						K.GVAPMHYAFM(15.995)GGGGNQHVFTEETGPAIAAK.L	1150.5304	0.00		4
						K.IVPLPYEYKAHV.-	1483.8439	0.00		3
						R.AIEEAGIPTIIIAALPPVVR.Q	2071.2486	0.00		2
			WP_003417352.1	class II fructose-1,6-bisphosphate aldolase	class			1	0.09	23
						K.GVPVDMLR.K	913.5055	1.05		2
						K.YTQPAEAVEFVER.T	1565.7726	1		2
						R.TGVDSLAIAIGTSHGAFK.F	1799.9782	0.87		3
						K.EAVEYAHSK.G	1088.5502	0.00		2
						K.IDDVLGSANSIN.-	1244.6249	0.00		2
						K.YAGPHTLVEMVK.A	1399.7534	0.00		3
						K.YTQPAEAVEFVER.T	1565.7726	0.00		3
						R.DAIQAVVESK.I	1114.6234	0.00		2
						R.ITKEAVEYAHSK.G	1458.8082	0.00		3
			WP_003426384.1	response regulator transcription factor	response			1	0.01	2
						K.TGFVACNEIR.E	1193.5863	0.99		2
						K.TTAPILFLTAK.T	1230.7588	1		2
			WP_003430074.1	TerD family protein	TerD			1	0.1	23
						K.DLIYFGNLK.S	1137.6434	0.87		2
						K.TTLIVGAIYR.K	1133.6808	1.06		2
						K.TTLIVGAIYRK.D	1289.8071	1		3
						K.EIAKYNLSDNYSEK.T	1756.8883	0.00		3
			WP_003430626.1	fructose-6-phosphate aldolase	fructose-6-phosphate			1	0.00	2
						K.AGANYIAPYVNR.L	1335.6935	1		2
						K.ITATAIFTAHQGFLAAK.A	1817.0281	0.00		3
						R.LDNISGDGVAMVSELIK.I	1815.9652	0.00		3
			WP_009887863.1	elongation factor Tu	elongation			1	0.15	234
						K.LLDQAQAGDNIGALLR.G	1694.9315	0.94		2
						K.LLDQAQAGDNIGALLR.G	1694.9315	0.92		3
						K.VQDEVELVGLTEAPR.K	1681.8887	1.06		2
						K.VQDEVELVGLTEAPR.K	1681.8887	1.02		3
						R.EHILLSR.Q	894.5287	1.37		2
						R.GITISTAHVEYETPNR.H	1814.9163	0.99		3
						R.HYAHVDCPGHADYVK.N	1824.8447	1.02		4
						R.KLLDQAQAGDNIGALLR.G	1852.0612	0.82		3
						R.KVVVTGVEMFR.K	1319.7635	0.94		3
						R.TVASGVVATIIE.-	1186.6809	1.07		2
						K.TTLTAAITK.T	974.6012	0.00		2
						R.DLLTEYDFPGDDTPIVR.G	1993.9714	0.00		2
						R.GITISTAHVEYETPNR.H	1814.9163	0.00		2
						R.HYAHVDCPGHADYVK.N	1824.8447	0.00		3
			WP_009888019.1	anaerobic carbon-monoxide dehydrogenase catalytic subunit	anaerobic			1	0.09	2
						K.CGFGLQGVCCR.L	1340.5788	1.03		2
						K.NLGLKDVECNA.-	1287.6493	0.88		2
						K.SEVFDAIVK.S	1062.5961	1.1		2
						R.GICGADADTIVAR.N	1345.666	0.98		2
						K.SSANQLEEIIIDR.R	1514.794	0.00		2
						K.VADKVINDLYK.S	1360.7966	0.00		2
						R.AVASGAACYLHVVENTAK.N	1916.9859	0.00		2
						R.AVASGAACYLHVVENTAK.N	1916.9859	0.00		3
			WP_009888868.1	acetyl-CoA C-acetyltransferase	acetyl-CoA			1	0.17	23
						-.MREVVIASAAR.T	1229.6914	1.17		3
						K.SVSAVELGVTAAK.E	1286.7446	1.05		2
						R.ILTTLLYEMK.R	1279.7462	0.76		2
						R.TAVGSFGGAFK.S	1096.5917	0.96		2
						-.M(15.995)REVVIASAAR.T	177.0824	0.00		3
						K.AQAEGKFDEEIVPVVIK.G	1956.1013	0.00		3
			WP_009889331.1	helix-turn-helix transcriptional regulator	helix-turn-helix			1	0.1	2
						K.ILVVSIPNPFEK.S	1410.8486	1.04		2
						R.GLTSVATDSLGK.I	1203.6711	1		2
						R.LIEILPSK.S	967.6318	0.85		2
						K.TNLSIGFLSQLER.G	1504.8249	0.00		2
			WP_009903761.1	cobalt-precorrin-8 methylmutase	cobalt-precorrin-8			1	0.08	23
						K.CLVADDETVK.L	1204.6009	0.95		2
						K.IFVLGNAPTALYK.V	1461.8595	0.89		2
						R.SMAAVEIAAK.E	1045.5842	1.06		2
						R.SMAAVEIAAKEEGR.K	1516.7919	1.06		3
						K.CLVADDETVKLAK.E	1544.8484	0.00		2
						K.CLVADDETVKLAK.E	1544.8484	0.00		3
						R.SMAAVEIAAKEEGR.K	1516.7919	0.00		2
			WP_009903853.1	GerMN domain-containing protein	GerMN			1	0.14	234
						K.LNSFTTK.D	865.4909	0.88		2
						K.NMNVEQIK.I	1030.5481	1.19		2
						K.SNLGSDAETLMLDSVAR.T	1805.8829	1.13		2
						K.SNLGSDAETLMLDSVAR.T	1805.8829	1.14		3
						K.SNTNVEQPKEENNTEKEVPNNK.A	2654.3229	0.82		3
						K.SNTNVEQPKEENNTEKEVPNNK.A	2654.3229	0.92		4
						K.TGILDVSSDFTK.S	1337.7079	1		2
						K.IDENTLFEELQK.L	1533.7926	0.00		2
						K.LNSFTTKDIDGVK.T	1520.845	0.00		2
						K.SNLGSDAETLM(15.995)LDSVAR.T	1164.5333	0.00		2
						K.SNLGSDAETLM(15.995)LDSVAR.T	1164.5333	0.00		3
			WP_003420072.1	NADPH-dependent glutamate synthase	NADPH-dependent			1.01	0.00	2
						K.VAVVGGGNVAMDAAR.T	1413.7398	1.01		2
						K.CVGGCPVGIDIPGFITK.I	1845.9562	0.00		2
						K.VAVIGSGPAGLACAGDLAK.K	1781.971	0.00		2
						K.VAVVGGGNVAM(15.995)DAAR.T	1000.5376	0.00		2
						R.VCPQESQCEGVCILGIK.S	2032.9825	0.00		2
			WP_003436675.1	1-(5-phosphoribosyl)-5- 1-(5-phosphoribosyl)-5-	1-(5-phosphoribosyl)-5-			1.01	0.13	23
						-.MIIFPAIDIKDNK.C	1600.9262	0.95		3
						K.AMNLYGAIIGK.A	1205.6842	0.85		2
						K.DGMLQGPNFDIYER.I	1681.777	1.15		2
						K.SLINAGVTR.V	957.5607	1.07		2
						K.AM(15.995)NLYGAIIGK.A	248.1195	0.00		2
						K.ETSLNVIASGGVTSIEDVKR.L	2131.1566	0.00		3
			WP_003437060.1	Fe-S-containing hydro-lyase	Fe-S-containing			1.01	0.00	2
						R.MDDLTIPLLER.G	1342.7166	1.01		2
						K.RSDEVIEGMQK.Y	1346.6864	0.00		2
						K.SCEIIAYEDLGAEAIRK.I	1994.0224	0.00		3
						R.M(15.995)DDLTIPLLER.G	177.0824	0.00		2
			WP_003438024.1	helix-turn-helix domain-containing protein	helix-turn-helix			1.01	0.00	2
						K.LYPIYPFSPQR.R	1407.7551	1.01		2
						K.TIFHNIEVYR.-	1318.7034	0.00		3
			WP_003439113.1	lipoprotein	lipoprotein			1.01	0.14	2
						K.EVTTMITYTK.K	1241.6577	0.82		2
						K.GISDALTEAEYK.Q	1351.6871	1.01		2
						K.VMSEANTLVK.S	1146.6318	1.1		2
						K.EVTTM(15.995)ITYTK.K	607.2887	0.00		2
						K.SYVTDEKNYDKK.E	1600.8348	0.00		3
			WP_009901804.1	TIGR04100 family radical SAM protein	TIGR04100			1.01	0.15	2
						K.SFDYMLDFAR.D	1291.5907	1.11		2
						R.INELIDVAK.F	1069.6383	0.9		2
						K.SFDYM(15.995)LDFAR.D	689.2731	0.00		2
						R.INTNGLSDLIHNK.K	1493.8202	0.00		3
						R.INTNGLSDLIHNKK.T	1649.9465	0.00		3
						R.INTNGLSDLIHNKK.T	1649.9465	0.00		4
			WP_003421155.1	50S ribosomal protein L14	50S			1.02	0.00	2
						K.IVSLAPEVL.-	967.5954	1.02		2
			WP_003422659.1	V-type ATP synthase subunit E	V-type			1.02	0.07	2
						K.EISGAYMEAK.K	1153.5689	1.07		2
						R.DITGGFIVK.K	1004.5906	0.97		2
						K.KQEILEEVILEAK.N	1624.9651	0.00		3
						K.LAEAEAEKAASK.E	1300.7238	0.00		3
						K.SNCTDDSEIVLSK.K	1522.7185	0.00		2
			WP_003428379.1	NUDIX hydrolase	NUDIX			1.02	0.14	23
						K.VDTVEIPGQGYQK.R	1488.7824	0.92		2
						R.ELKEETGYSAK.N	1337.7079	1.12		3
						K.VDTVEIPGQGYQKR.E	1644.8835	0.00		3
			WP_003428573.1	electron transfer flavoprotein subunit alpha/FixB family pr	electron			1.02	0.00	2
						K.AADPIVVLFGATSIGR.D	1613.9141	1.02		2
						K.VSALLLGSK.V	942.6114	0.00		2
						R.ATIDAGWLDK.A	1144.6128	0.00		2
			WP_003428889.1	carboxymuconolactone decarboxylase family protein	carboxymuconolactone			1.02	0.02	2
						K.IGVIGGGSITYPNAR.F	1501.8253	1.04		2
						K.ILEEFNI.-	904.4906	1.01		2
			WP_009902280.1	RnfABCDGE type electron transport complex subunit G	RnfABCDGE			1.02	0.09	2
						K.TAEPLEVAK.G	1012.5805	1.09		2
						R.NIQANNELR.K	1098.5782	0.96		2
						K.AKDDAFKGQYK.G	1381.7606	0.00		3
						R.NIQANNELRK.A	1254.7044	0.00		2
						R.NIQANNELRK.A	1254.7044	0.00		3
			WP_009903196.1	ribosome-associated translation inhibitor RaiA	ribosome-associated			1.02	0.00	2
						K.AGGYGLIEQD.-	1049.5029	1.02		2
						-.MQIIVSGR.Q	930.5321	0.00		2
						K.LTDGIKGYVDGK.L	1348.7602	0.00		2
						K.YLDPESEVK.V	1134.5809	0.00		2
						K.YLDPESEVKVTVSAK.K	1747.9608	0.00		3
			contaminant_KERATIN13	no description	no			1.02	0.26	23
						K.SLNNQFASFIDK.V	1438.7456	1.02		2
						K.SLNNQFASFIDKVR.F	1693.9152	1.62		3
						K.YEELQITAGR.H	1206.6245	1.15		2
						R.FLEQQNQVLQTK.W	1530.8406	0.92		2
						R.GGGGGGYGSGGSSYGSGGGSYGSGGGGGGGR.G	2411.9792	1.02		2
						R.TLLEGEESR.M	1060.5401	1.38		2
						R.TNAENEFVTIK.K	1320.6925	0.91		2
						R.TNAENEFVTIKK.D	1476.8188	0.88		3
						K.DVDGAYM(15.995)TK.V	797.3266	0.00		2
						K.QISNLQQSISDAEQR.G	1743.8751	0.00		2
						K.SKAEAESLYQSK.Y	1423.7559	0.00		2
						K.SKAEAESLYQSK.Y	1423.7559	0.00		3
						R.DYQELMNTK.L	1196.5747	0.00		2
						R.GGGGGGYGSGGSSYGSGGGSYGSGGGGGGGR.G	2411.9792	0.00		3
						R.LRSEIDNVKK.Q	1284.7765	0.00		3
						R.TNAENEFVTIKK.D	1476.8188	0.00		2
			WP_003425850.1	F0F1 ATP synthase subunit beta	F0F1			1.03	0.02	2
						K.TALVFGQMNEPPGAR.M	1614.8188	1.04		2
						K.VVDLLAPYLK.G	1185.7373	1		2
						R.QISSLGIYPAVDPLESTSR.I	2061.0823	1.03		2
						K.TALVFGQM(15.995)NEPPGAR.M	893.4681	0.00		2
						K.TVLIQELINNIAK.Q	1523.9287	0.00		2
						R.GM(15.995)EVVDTGGPISVPVGDETLGR.I	234.1038	0.00		2
						R.GMEVVDTGGPISVPVGDETLGR.I	2213.1079	0.00		2
						R.QISSLGIYPAVDPLESTSR.I	2061.0823	0.00		3
						R.TREGNDLYGEMSESGVINK.T	2155.0297	0.00		3
			WP_004454888.1	nitroreductase family protein	nitroreductase			1.03	0.16	23
						-.MELQDTIFKR.Q	1335.7221	1.03		3
						K.FKNQDVSDEDILK.M	1633.8563	0.77		3
						K.NQDVSDEDILK.M	1330.6616	1.07		2
			WP_009892717.1	GntR family transcriptional regulator	GntR			1.03	0.00	2
						R.TLIETYALEK.M	1235.7013	1.03		2
						K.MMQEEEEVFQQK.L	1610.732	0.00		2
						K.SNLDEILYHK.I	1286.6871	0.00		3
						K.SVELALADLELHK.A	1492.8501	0.00		3
						K.VYVPEYEYDM(15.995)VK.Q	1334.5741	0.00		2
						K.VYVPEYEYDMVK.Q	1589.7687	0.00		2
			WP_009897948.1	cell wall-binding cysteine protease Cwp84	cell			1.03	0.07	23
						K.SQGDLIDGLAVGALGAK.T	1639.9145	0.94		2
						K.SQGDLIDGLAVGALGAK.T	1639.9145	1.03		3
						K.TSSGQATSGESLTGADRYETAVK.V	2372.1537	1.07		3
						K.IIDKFYPSSDLK.Y	1508.849	0.00		2
						K.NVQTQLSNM(15.995)GISVER.I	1061.5175	0.00		2
						K.NVQTQLSNMGISVER.I	1702.8672	0.00		2
						K.TDSPVVLVGNKLDESQK.N	1913.0551	0.00		3
						R.VGGNGNENAFNELNTLLGK.-	2017.031	0.00		2
			WP_009903837.1	DUF488 domain-containing protein	DUF488			1.03	0.00	2
						R.IVLLGAMQEPIR.C	1366.8006	1.03		2
						K.VAKEDIFLNGIER.L	1558.8719	0.00		3
						R.IVLLGAM(15.995)QEPIR.C	743.4615	0.00		2
						R.TNKDVYTQEGYADFEK.V	1991.9558	0.00		3
			WP_003427763.1	(R)-2-hydroxyisocaproyl-CoA dehydratase subunit beta	(R)-2-hydroxyisocaproyl-CoA			1.04	0.00	2
						K.FCDPEEYDYPLVR.K	1729.7658	1.04		2
						R.GSLIVDEVK.K	1014.5961	0.00		2
						R.QWSNIEGCSLAYDPK.K	1822.856	0.00		2
			WP_003430702.1	transketolase family protein	transketolase			1.04	9.51	23
						R.AATPDVNSENYKFEIGK.G	1967.0081	1.01		3
						R.GIPNMVVLNPADALEAR.Q	1806.9662	1.07		2
						R.GIPNMVVLNPADALEAR.Q	1806.9662	20		3
						R.NSVAYPNLNVK.I	1273.703	0.85		2
						R.GIPNM(15.995)VVLNPADALEAR.Q	558.2836	0.00		2
			WP_003435637.1	trypsin-like peptidase domain-containing protein	trypsin-like			1.04	0.16	2
						K.ASQAEGLGFAIPINTAK.S	1742.9567	0.93		2
						K.TVTQGIISGLDR.T	1286.7194	1.15		2
						K.ASQAEGLGFAIPINTAK.S	1742.9567	0.00		3
						K.GTDVSNYEAATGTK.L	1468.7046	0.00		2
						K.TGLTPAEFADSDKVK.V	1661.8876	0.00		3
						K.VGDTDITGMNDLNK.K	1547.7501	0.00		2
			WP_009890262.1	GNAT family N-acetyltransferase	GNAT			1.04	0.11	23
						R.EDAQAFNEIRR.T	1375.6844	1.12		3
						R.NTLALMSDR.V	1047.5383	0.96		2
						K.LGFEIEGTKK.Y	1204.7067	0.00		3
						R.DGKFEDVYIMGR.Y	1484.7334	0.00		3
						R.EDAQAFNEIR.R	1219.5833	0.00		2
			WP_009892576.1	NAD(P)/FAD-dependent oxidoreductase	NAD(P)/FAD-dependent			1.04	0.00	2
						R.DGNFVYSVR.N	1083.5349	1.04		2
						K.DIYAAGDVVGK.N	1162.6234	0.00		2
						K.VVQTEDITVNYDK.L	1578.8141	0.00		2
			WP_009897329.1	transporter substrate-binding domain-containing protein	transporter			1.04	0.25	23
						K.EINEVIEEMYKDGTLTK.I	2096.0792	0.86		3
						K.VGVGTGAVANEILK.E	1382.8133	1.22		2
						K.DITKEPINE.-	1113.5918	0.00		2
			WP_009902143.1	formate C-acetyltransferase	formate			1.04	0.00	2
						K.SGIITGLPDAYGR.G	1346.7194	1.04		2
						K.EQQLDVINR.T	1141.6091	0.00		2
						K.TLLYAINGGVDEK.S	1447.7922	0.00		2
						K.VSIDTSSVQYENDDLM(15.995)R.A	1842.8193	0.00		2
						K.VSIDTSSVQYENDDLMR.A	1999.9238	0.00		2
			WP_003426450.1	adenine phosphoribosyltransferase	adenine			1.05	0.1	23
						K.LSNYDVNSLIKY.-	1483.7922	1.08		2
						K.VAIVDDLLATGGTMEAAAK.L	1902.0213	1.05		2
						K.VAIVDDLLATGGTMEAAAK.L	1902.0213	0.9		3
						K.VAIVDDLLATGGTM(15.995)EAAAK.L	1402.7378	0.00		2
						K.VAIVDDLLATGGTM(15.995)EAAAK.L	1402.7378	0.00		3
			WP_003438030.1	nitroreductase family protein	nitroreductase			1.05	0.01	3
						K.SDMQVVTDKGSTR.L	1478.7399	1.06		3
						R.ALLDAFHYAR.L	1203.64	1.04		3
			WP_009895920.1	GntR family transcriptional regulator	GntR			1.05	0.00	3
						K.MLTYSNNQHIEVVK.S	1730.9025	1.05		3
						K.KIQNGEYEANQR.I	1504.7634	0.00		3
						K.LSNEFHDIYITK.S	1534.8031	0.00		3
			WP_003422090.1	proline racemase	proline			1.06	0.34	23
						K.EYLEENLDYLR.T	1483.7195	1.13		2
[truncated: 367 more rows]

## Sheet: BHIS_BHIS Spectral Counts
accession	description	total spectral count	HeavySpec	LightSpec
WP_009897960.1	S-layer protein SlpA	161	81	80
WP_003421173.1	50S ribosomal protein L3	136	69	67
WP_003419930.1	NADH peroxidase	101	53	48
WP_009887887.1	50S ribosomal protein L4	100	54	46
WP_003435673.1	50S ribosomal protein L5	92	45	47
WP_009889371.1	NADH peroxidase	91	47	44
WP_003416023.1	phosphate propanoyltransferase	73	41	32
contaminant_KERATIN03	no description	72	34	38
WP_003421188.1	50S ribosomal protein L1	69	33	36
WP_003421121.1	30S ribosomal protein S4	68	36	32
WP_003427760.1	electron transfer flavoprotein subunit beta/FixA family protein	66	32	34
WP_003420710.1	MFS transporter	66	31	35
WP_003416871.1	glycine/sarcosine/betaine reductase component B subunit, GrdE	65	29	36
WP_003430598.1	ribosome recycling factor	63	31	32
contaminant_KERATIN13	no description	62	30	32
WP_003427766.1	isocaprenoyl-CoA:2-hydroxyisocaproate CoA-transferase HadA	58	30	28
contaminant_KERATIN22	no description	58	29	29
WP_009903412.1	SIS domain-containing protein	55	22	33
WP_003422104.1	D-proline reductase (dithiol) proprotein PrdA	55	26	29
WP_003421190.1	transcription termination/antitermination factor NusG	52	25	27
WP_003427762.1	acyl-CoA dehydrogenase family protein	50	25	25
WP_003423115.1	fructose-6-phosphate aldolase	49	22	27
WP_003436172.1	SDR family oxidoreductase	48	23	25
WP_003434417.1	ribosome-associated translation inhibitor RaiA	47	21	26
WP_011860916.1	translation initiation factor IF-3	45	22	23
WP_003425850.1	F0F1 ATP synthase subunit beta	45	22	23
WP_025992033.1	nucleotide exchange factor GrpE	41	18	23
WP_003417102.1	ATP-dependent Clp endopeptidase proteolytic subunit ClpP	41	22	19
WP_003435668.1	50S ribosomal protein L6	40	23	17
WP_009897862.1	pyruvate:ferredoxin (flavodoxin) oxidoreductase	40	22	18
WP_009901573.1	adenylate kinase	39	19	20
WP_011861888.1	D-proline reductase (dithiol) protein PrdB	37	17	20
WP_009897952.1	cell wall-binding repeat-containing protein	37	23	14
WP_009889023.1	elongation factor P	36	21	15
WP_009898446.1	pyrroline-5-carboxylate reductase	35	17	18
WP_009888223.1	2-hydroxyisocaproyl-CoA dehydratase activator HadI	34	17	17
WP_009893687.1	YggS family pyridoxal phosphate-dependent enzyme	34	19	15
WP_003437840.1	uracil phosphoribosyltransferase	33	14	19
WP_009902143.1	formate C-acetyltransferase	33	16	17
WP_009887863.1	elongation factor Tu	32	14	18
WP_003427763.1	(R)-2-hydroxyisocaproyl-CoA dehydratase subunit beta	31	15	16
WP_003421187.1	50S ribosomal protein L10	30	17	13
WP_003435129.1	lactate utilization protein	30	17	13
WP_004454389.1	2-hydroxyglutaryl-CoA dehydratase	30	17	13
WP_003428442.1	3-oxoacyl-[acyl-carrier-protein] reductase	30	15	15
WP_003420711.1	2-oxoacid:acceptor oxidoreductase family protein	30	16	14
WP_003439113.1	lipoprotein	29	15	14
WP_004454137.1	MBL fold metallo-hydrolase	29	14	15
WP_003430302.1	TerD family protein	29	15	14
WP_003434098.1	pyrroline-5-carboxylate reductase	29	12	17
WP_009892132.1	GntR family transcriptional regulator	27	13	14
WP_003430597.1	UMP kinase	27	14	13
WP_009898069.1	bifunctional acetaldehyde-CoA/alcohol dehydrogenase	27	17	10
WP_003439345.1	deoxyribose-phosphate aldolase	25	12	13
WP_003421197.1	FAD-dependent thymidylate synthase	25	13	12
WP_003431407.1	D-2-hydroxyacid dehydrogenase	25	11	14
WP_003424537.1	30S ribosomal protein S2	24	15	9
WP_003417347.1	electron transfer flavoprotein subunit alpha/FixB family protein	24	12	12
WP_003418513.1	rubrerythrin family protein	23	13	10
contaminant_KERATIN02	no description	23	11	12
WP_003434301.1	nitroreductase family protein	23	12	11
WP_009901862.1	salicylate synthase	23	14	9
WP_003435194.1	ATP-dependent chaperone ClpB	23	14	9
WP_009903196.1	ribosome-associated translation inhibitor RaiA	21	9	12
WP_003437451.1	pyruvate formate lyase-activating protein	21	9	12
WP_009903853.1	GerMN domain-containing protein	20	11	9
WP_003420839.1	redox-sensing transcriptional repressor Rex	20	10	10
WP_003438024.1	helix-turn-helix domain-containing protein	20	9	11
WP_009891688.1	hypoxanthine phosphoribosyltransferase	20	10	10
WP_009901929.1	ABC transporter ATP-binding protein	19	8	11
WP_003419057.1	septum site-determining protein MinD	19	12	7
WP_004454633.1	xanthine phosphoribosyltransferase	19	9	10
WP_003416703.1	helix-turn-helix transcriptional regulator	19	8	11
WP_009892717.1	GntR family transcriptional regulator	19	9	10
WP_009901692.1	chaperonin GroEL	19	12	7
WP_009897956.1	cell wall-binding protein Cwp2	19	4	15
WP_003426928.1	DivIVA domain-containing protein	18	10	8
WP_003416528.1	uracil-DNA glycosylase	18	9	9
WP_003429190.1	ATP-binding cassette domain-containing protein	18	11	7
WP_009898301.1	phosphopyruvate hydratase	18	9	9
WP_009890358.1	alpha/beta hydrolase	18	9	9
WP_009897922.1	phosphoenolpyruvate--protein phosphotransferase	18	8	10
WP_003424711.1	sporulation transcription factor Spo0A	17	5	12
WP_003419758.1	DUF3867 domain-containing protein	17	10	7
WP_009901694.1	nickel pincer cofactor biosynthesis protein LarB	17	10	7
WP_003420269.1	TerD family protein	17	8	9
WP_003425856.1	F0F1 ATP synthase subunit delta	17	9	8
WP_003424529.1	isoprenyl transferase	17	8	9
WP_009901809.1	(R)-2-hydroxyisocaproyl-CoA dehydratase subunit HadB	17	8	9
WP_009887855.1	23S rRNA (guanosine(2251)-2'-O)-methyltransferase RlmB	17	8	9
WP_003434235.1	protein jag	16	8	8
WP_003428771.1	cyclase family protein	16	8	8
WP_003428343.1	hypothetical protein	16	8	8
WP_003420866.1	NAD-specific glutamate dehydrogenase	16	10	6
WP_003422204.1	transcription elongation factor GreA	15	8	7
WP_003439494.1	TerD family protein	15	7	8
WP_003425980.1	type III pantothenate kinase	15	9	6
WP_009898087.1	pentapeptide repeat-containing protein	14	7	7
WP_009888867.1	electron transfer flavoprotein subunit beta/FixA family protein	14	5	9
WP_003431170.1	guanylate kinase	14	7	7
WP_003420885.1	orotate phosphoribosyltransferase	14	6	8
WP_009892314.1	sulfurtransferase-like selenium metabolism protein YedF	14	6	8
WP_009902140.1	nitroreductase	14	6	8
WP_009903270.1	low-specificity L-threonine aldolase	14	6	8
WP_003438268.1	GTP-sensing pleiotropic transcriptional regulator CodY	13	5	8
WP_003435816.1	DUF1847 domain-containing protein	13	6	7
WP_003438166.1	O-methyltransferase	13	6	7
WP_003432265.1	cyclodeaminase/cyclohydrolase family protein	13	7	6
contaminant_KERATIN21	no description	13	8	5
contaminant_KERATIN05	no description	13	7	6
WP_003428218.1	recombinase RecA	13	7	6
WP_003431138.1	ribulose-phosphate 3-epimerase	13	7	6
contaminant_KERATIN17	no description	13	7	6
WP_009895750.1	cell division protein ZapA	12	5	7
WP_032507408.1	diphthine--ammonia ligase	12	6	6
WP_003438808.1	4-hydroxy-tetrahydrodipicolinate reductase	12	5	7
WP_003433947.1	4Fe-4S binding protein	12	6	6
WP_003438469.1	GntR family transcriptional regulator	12	6	6
WP_004454531.1	TerD family protein	12	4	8
WP_004454770.1	tRNA threonylcarbamoyladenosine dehydratase	12	4	8
WP_003434107.1	MetQ/NlpA family ABC transporter substrate-binding protein	12	5	7
WP_003429271.1	PLP-dependent aminotransferase family protein	12	7	5
WP_003421962.1	type I glyceraldehyde-3-phosphate dehydrogenase	12	6	6
WP_003436178.1	elongation factor G	12	7	5
WP_003426450.1	adenine phosphoribosyltransferase	11	2	9
WP_003428245.1	NAD-dependent protein deacylase	11	6	5
WP_003416006.1	hypoxanthine phosphoribosyltransferase	11	6	5
WP_009890640.1	DUF4342 domain-containing protein	11	6	5
WP_009903837.1	DUF488 domain-containing protein	11	7	4
WP_003439746.1	tRNA-binding protein	11	6	5
WP_003421130.1	type I methionyl aminopeptidase	11	5	6
WP_009896932.1	response regulator transcription factor	10	5	5
WP_009902542.1	lactate utilization protein	10	4	6
WP_003431048.1	bis(5'-nucleosyl)-tetraphosphatase (symmetrical) YqeK	10	8	2
WP_009888208.1	hydrolase	10	5	5
WP_009903761.1	cobalt-precorrin-8 methylmutase	10	5	5
WP_009903755.1	precorrin-3B C(17)-methyltransferase	10	3	7
WP_003417965.1	helix-turn-helix transcriptional regulator	10	5	5
WP_003430279.1	tRNA pseudouridine(38-40) synthase TruA	10	4	6
WP_003421079.1	HAD-IB family hydrolase	10	5	5
WP_003420702.1	butyrate kinase	10	6	4
WP_009895182.1	proline--tRNA ligase	10	4	6
WP_003436863.1	NADP-dependent glyceraldehyde-3-phosphate dehydrogenase	10	4	6
WP_009903328.1	cell wall-binding protein Cwp10	10	5	5
WP_003438030.1	nitroreductase family protein	10	2	8
WP_009901804.1	TIGR04100 family radical SAM protein	9	2	7
WP_003421194.1	NYN domain-containing protein	9	4	5
WP_009903260.1	HAD family hydrolase	9	5	4
WP_009891775.1	ribosome biogenesis GTP-binding protein YihA/YsxC	9	6	3
WP_003436878.1	HD domain-containing protein	9	4	5
WP_003418356.1	dihydropteroate synthase	9	4	5
WP_004454870.1	hypothetical protein	9	5	4
WP_003434148.1	triose-phosphate isomerase	9	5	4
WP_003438150.1	glycosyltransferase family 2 protein	9	4	5
WP_003435254.1	CoA pyrophosphatase	9	4	5
WP_003430074.1	TerD family protein	9	3	6
WP_003416253.1	zinc metallopeptidase	9	2	7
WP_003419125.1	enoyl-[acyl-carrier-protein] reductase FabK	9	5	4
WP_009896192.1	cysteine desulfurase NifS	9	4	5
WP_003429565.1	phosphoglycerate kinase	9	6	3
WP_009897948.1	cell wall-binding cysteine protease Cwp84	9	5	4
WP_009895920.1	GntR family transcriptional regulator	8	3	5
WP_009898403.1	ImmA/IrrE family metallo-endopeptidase	8	3	5
WP_009897067.1	transcriptional repressor LexA	8	5	3
WP_009903855.1	16S rRNA (guanine(527)-N(7))-methyltransferase RsmG	8	4	4
WP_003428486.1	RnfABCDGE type electron transport complex subunit B	8	2	6
WP_009902717.1	radical SAM protein	8	4	4
WP_003429754.1	ABC transporter ATP-binding protein	8	4	4
WP_003438086.1	FadR family transcriptional regulator	8	4	4
WP_003420704.1	hypothetical protein	8	4	4
WP_009892113.1	thymidylate kinase	8	4	4
WP_009889331.1	helix-turn-helix transcriptional regulator	8	3	5
WP_009901695.1	nickel pincer cofactor biosynthesis protein LarC	8	4	4
WP_003429416.1	GTP cyclohydrolase I FolE	8	4	4
WP_009902280.1	RnfABCDGE type electron transport complex subunit G	8	4	4
WP_004454646.1	aldehyde dehydrogenase family protein	8	2	6
WP_004454042.1	serine dehydratase subunit alpha family protein	8	5	3
WP_003418888.1	acyl-CoA dehydrogenase	8	4	4
contaminant_KERATIN04	no description	8	5	3
WP_003421367.1	F0F1 ATP synthase subunit alpha	8	4	4
WP_009902521.1	cell wall-binding protein Cwp20	8	4	4
WP_009903387.1	hypothetical protein	7	5	2
WP_009902469.1	cysteine hydrolase	7	4	3
WP_003435191.1	hypothetical protein	7	3	4
WP_009901871.1	thioesterase	7	4	3
WP_003434936.1	SEC-C domain-containing protein	7	3	4
WP_009902665.1	PepSY domain-containing protein	7	3	4
WP_003428379.1	NUDIX hydrolase	7	3	4
WP_009901935.1	response regulator transcription factor	7	3	4
WP_003417352.1	class II fructose-1,6-bisphosphate aldolase	7	3	4
WP_011861621.1	peptidoglycan editing factor PgeF	7	4	3
WP_003428474.1	FprA family A-type flavoprotein	7	4	3
WP_003421168.1	50S ribosomal protein L2	7	3	4
WP_003438534.1	Cof-type HAD-IIB family hydrolase	7	2	5
WP_009897033.1	YdcF family protein	7	3	4
WP_003422061.1	aspartate-semialdehyde dehydrogenase	7	3	4
WP_003432442.1	3-methyl-2-oxobutanoate dehydrogenase subunit VorB	7	4	3
WP_009902746.1	cell wall-binding cysteine protease Cwp13	7	5	2
WP_009888019.1	anaerobic carbon-monoxide dehydrogenase catalytic subunit	7	3	4
WP_009890612.1	pyruvate, phosphate dikinase	7	5	2
WP_009902250.1	phosphodiesterase	6	3	3
WP_003438917.1	hypothetical protein	6	2	4
WP_009903721.1	DJ-1/PfpI family protein	6	3	3
WP_003436215.1	tRNA-binding protein	6	5	1
WP_009889030.1	16S rRNA processing protein RimM	6	4	2
WP_004454825.1	recombination regulator RecX	6	2	4
WP_003424535.1	elongation factor Ts	6	4	2
WP_009898027.1	HAD family phosphatase	6	3	3
WP_003421163.1	30S ribosomal protein S3	6	2	4
WP_009895854.1	alpha-hydroxy-acid oxidizing protein	6	2	4
WP_009901675.1	response regulator transcription factor	6	4	2
contaminant_KERATIN08	no description	6	4	2
WP_009891957.1	cobalt-precorrin-4 methyltransferase	6	3	3
WP_009902192.1	cell wall-binding protein Cwp25	6	3	3
WP_003417090.1	trigger factor	6	3	3
WP_009897890.1	cell wall-binding protein Cwp22	6	3	3
WP_003436400.1	FAD-dependent oxidoreductase	6	3	3
WP_009902783.1	histidine phosphatase family protein	5	4	1
WP_004454512.1	TerD family protein	5	3	2
WP_009891708.1	DUF4364 family protein	5	2	3
WP_003430209.1	Mrp/NBP35 family ATP-binding protein	5	2	3
WP_009889131.1	peptidylprolyl isomerase	5	2	3
WP_003428191.1	pyridoxamine kinase	5	3	2
WP_003429806.1	XRE family transcriptional regulator	5	2	3
WP_003439413.1	shikimate kinase	5	3	2
WP_003436372.1	ABC transporter ATP-binding protein	5	2	3
WP_009902544.1	3-methyl-2-oxobutanoate hydroxymethyltransferase	5	3	2
WP_003430626.1	fructose-6-phosphate aldolase	5	3	2
WP_003437535.1	NAD(+) synthase	5	2	3
WP_009901962.1	hypothetical protein	5	1	4
WP_003432205.1	amino acid ABC transporter ATP-binding protein	5	2	3
WP_009901770.1	iron-containing alcohol dehydrogenase	5	2	3
WP_003438357.1	pyridoxal phosphate-dependent aminotransferase	5	3	2
WP_003430157.1	NAD(P)/FAD-dependent oxidoreductase	5	3	2
WP_003436174.1	DNA-directed RNA polymerase subunit beta	5	3	2
WP_003428430.1	GNAT family N-acetyltransferase	4	2	2
WP_003430806.1	indolepyruvate oxidoreductase subunit beta	4	2	2
WP_003428415.1	transcription antitermination factor NusB	4	3	1
WP_009892068.1	aminoacyl-tRNA hydrolase	4	1	3
WP_004453642.1	superoxide reductase	4	2	2
WP_003430702.1	transketolase family protein	4	3	1
WP_009902004.1	hydrolase	4	3	1
WP_003436669.1	bifunctional phosphoribosyl-AMP cyclohydrolase/phosphoribosyl-ATP diphosphatase HisIE	4	2	2
WP_004454497.1	sugar O-acetyltransferase	4	2	2
WP_004454472.1	response regulator transcription factor	4	2	2
WP_003423380.1	carbonic anhydrase	4	2	2
WP_003419857.1	Fis family transcriptional regulator	4	3	1
WP_009903228.1	TetR/AcrR family transcriptional regulator	4	2	2
WP_003434455.1	ABC transporter ATP-binding protein	4	1	3
WP_004454386.1	TetR/AcrR family transcriptional regulator	4	2	2
WP_004454488.1	flavodoxin family protein	4	2	2
WP_003429132.1	6-phosphofructokinase	4	2	2
WP_009897939.1	glycosyl transferase	4	2	2
WP_009903671.1	proline reductase cluster protein PrdD	4	0	4
WP_009902285.1	transglutaminase domain-containing protein	4	2	2
WP_003420697.1	diadenylate cyclase CdaA	4	1	3
WP_009897782.1	DUF116 domain-containing protein	4	3	1
WP_009902950.1	DUF4878 domain-containing protein	4	2	2
WP_009890721.1	threonine ammonia-lyase	4	2	2
WP_009891694.1	TSUP family transporter	4	1	3
WP_009903738.1	pyruvate kinase	4	1	3
WP_009892576.1	NAD(P)/FAD-dependent oxidoreductase	4	1	3
WP_003436675.1	1-(5-phosphoribosyl)-5-[(5-phosphoribosylamino)methylideneamino]imidazole-4-carboxamide isomerase	4	3	1
WP_003435562.1	serine--tRNA ligase	4	3	1
WP_009888460.1	response regulator transcription factor	4	2	2
WP_009889910.1	tRNA (guanosine(46)-N7)-methyltransferase TrmB	4	1	3
WP_003425582.1	ATP-dependent Clp protease ATP-binding subunit	4	2	2
WP_003436292.1WP_009903205.1	ABC transporter ATP-binding protein sn-glycerol-3-phosphate ABC transporter ATP-binding protein UgpC	4	1	3
WP_009903471.1	M20 family metallopeptidase	4	2	2
WP_003429300.1	membrane protein insertase YidC	4	3	1
WP_009902000.1	threonine--tRNA ligase	4	3	1
WP_003416187.1	5'-methylthioadenosine/adenosylhomocysteine nucleosidase	3	2	1
WP_003416451.1	RidA family protein	3	1	2
WP_003437730.1	precorrin-6A reductase	3	3	0
WP_009902785.1	1-acyl-sn-glycerol-3-phosphate acyltransferase	3	2	1
WP_009897209.1	lipoprotein	3	2	1
WP_009891044.1	sugar transferase	3	1	2
WP_009892015.1	5-formyltetrahydrofolate cyclo-ligase	3	1	2
WP_009897978.1	GntR family transcriptional regulator	3	3	0
WP_009898664.1	decarboxylating cobalt-precorrin-6B (C(15))-methyltransferase	3	2	1
WP_003437218.1	alpha/beta hydrolase	3	2	1
WP_003433741.1	AIM24 family protein	3	0	3
WP_109277183.1	peptidoglycan-binding protein	3	1	2
WP_003416656.1	glycine--tRNA ligase subunit alpha	3	1	2
WP_009898085.1	GyrI-like domain-containing protein	3	1	2
WP_009893498.1	GNAT family N-acetyltransferase	3	2	1
WP_003421180.1	30S ribosomal protein S7	3	1	2
WP_009897856.1	ABC transporter permease	3	3	0
WP_003429162.1	orotidine-5'-phosphate decarboxylase	3	1	2
WP_003437174.1	NfeD family protein	3	1	2
WP_009902019.1	hypothetical protein	3	1	2
WP_003437523.1	HEAT repeat domain-containing protein	3	1	2
WP_009902007.1	TetR/AcrR family transcriptional regulator	3	2	1
WP_003436795.1	phenylalanine--tRNA ligase subunit alpha	3	1	2
WP_003429376.1	MgtC/SapB family protein	3	2	1
WP_009888951.1	polyprenyl synthetase family protein	3	2	1
WP_009891147.1	YhbD family protein	3	2	1
WP_011861534.1	glycine reductase complex selenoprotein B	3	2	1
WP_009895825.1	YigZ family protein	3	2	1
WP_003438350.1	undecaprenyl-diphosphate phosphatase	3	2	1
WP_009902006.1	TetR/AcrR family transcriptional regulator	3	2	1
WP_003437036.1	response regulator transcription factor	3	1	2
WP_003439900.1	proline iminopeptidase-family hydrolase	3	1	2
WP_003426384.1	response regulator transcription factor	3	2	1
WP_003436882.1	aminoacyl-histidine dipeptidase	3	2	1
WP_003432043.1	TrmB family transcriptional regulator	3	2	1
WP_009895388.1	energy-coupling factor ABC transporter permease	3	0	3
contaminant_KERATIN16	no description	3	2	1
WP_009901581.1	anaerobic ribonucleoside triphosphate reductase	3	1	2
WP_009902118.1	anaerobic carbon-monoxide dehydrogenase catalytic subunit	3	2	1
WP_003430934.1	molecular chaperone DnaK	3	2	1
WP_003428216.1	ribonuclease Y	3	2	1
WP_009902401.1	leucyl aminopeptidase	3	2	1
WP_009902014.1	50S ribosome-binding GTPase	3	2	1
WP_003422320.1	ferredoxin	2	1	1
WP_009902921.1	flavodoxin	2	1	1
Reverse_WP_003421160.1	50S ribosomal protein L16	2	1	1
WP_003431186.1	bifunctional pyr operon transcriptional regulator/uracil phosphoribosyltransferase PyrR	2	1	1
WP_003426034.1	ABC transporter ATP-binding protein	2	1	1
WP_009903759.1	cobalt-precorrin-7 (C(5))-methyltransferase	2	1	1
WP_004454132.1	gamma carbonic anhydrase family protein	2	2	0
WP_003418769.1	helix-turn-helix transcriptional regulator	2	0	2
WP_009903159.1	hypothetical protein	2	2	0
WP_009901540.1	recombination mediator RecR	2	1	1
WP_003418897.1	3-hydroxybutyryl-CoA dehydrogenase	2	1	1
WP_009894741.1	hypothetical protein	2	1	1
WP_003432207.1	transporter substrate-binding domain-containing protein	2	1	1
WP_003433825.1	N-acetylmannosamine-6-phosphate 2-epimerase	2	0	2
WP_003422659.1	V-type ATP synthase subunit E	2	1	1
WP_009901731.1	HAD family hydrolase	2	1	1
WP_003432348.1	phosphate signaling complex protein PhoU	2	0	2
WP_003435286.1	TetR/AcrR family transcriptional regulator	2	2	0
WP_003419111.1	DUF177 domain-containing protein	2	0	2
WP_003434506.1	dihydroorotate dehydrogenase electron transfer subunit	2	0	2
WP_009901472.1	zinc ribbon domain-containing protein	2	1	1
WP_009902949.1	amino acid racemase	2	1	1
WP_003434069.1	cell division protein	2	2	0
WP_003436135.1	zinc metalloprotease Zmp1	2	1	1
WP_003421117.1	50S ribosomal protein L17	2	1	1
WP_003422090.1	proline racemase	2	2	0
WP_004454936.1	TetR/AcrR family transcriptional regulator	2	1	1
WP_003436558.1	SGNH/GDSL hydrolase family protein	2	1	1
WP_003439979.1	GntR family transcriptional regulator	2	1	1
WP_004454415.1	helix-turn-helix domain-containing protein	2	1	1
WP_009902687.1	lipoprotein	2	1	1
WP_009902937.1	TetR/AcrR family transcriptional regulator	2	1	1
WP_009888868.1	acetyl-CoA C-acetyltransferase	2	0	2
WP_009895177.1	2-C-methyl-D-erythritol 4-phosphate cytidylyltransferase	2	1	1
WP_004454998.1	flavodoxin family protein	2	1	1
WP_003438103.1	beta-ketoacyl-ACP synthase II	2	1	1
WP_003438473.1	helix-turn-helix transcriptional regulator	2	1	1
WP_009890262.1	GNAT family N-acetyltransferase	2	1	1
WP_003435799.1	HAD family hydrolase	2	1	1
WP_003421389.1	peptide chain release factor 1	2	1	1
WP_009903754.1	porphobilinogen synthase	2	1	1
WP_009902455.1	LamB/YcsF family protein	2	1	1
WP_009902635.1	alpha/beta hydrolase	2	1	1
Reverse_WP_003428202.1	glutamine synthetase	2	0	2
WP_022618489.1	hypothetical protein	2	1	1
WP_009903074.1	glycoside hydrolase family 65 protein	2	1	1
WP_003436401.1	VanG-Cd-type vancomycin resistance DNA-binding response regulator VanR	2	1	1
WP_009903112.1	aspartate/glutamate racemase family protein	2	1	1
WP_003423398.1	TetR/AcrR family transcriptional regulator	2	1	1
WP_009902534.1	DUF1002 domain-containing protein	2	1	1
WP_009890867.1	cell division protein FtsZ	2	1	1
WP_025992040.1	2,3-bisphosphoglycerate-independent phosphoglycerate mutase	2	1	1
WP_009902629.1	phospho-sugar mutase	2	1	1
WP_003431873.1	proline reductase-associated electron transfer protein PrdC	2	1	1
WP_009903275.1	aminopeptidase P family protein	2	1	1

## Sheet: MM_MM Spectral Counts
accession	description	Total spec count	HeavySpec	LightSpec
WP_009897960.1	S-layer protein SlpA	196	96	100
WP_003419930.1	NADH peroxidase	185	90	95
WP_009889371.1	NADH peroxidase	146	68	78
WP_003435673.1	50S ribosomal protein L5	110	60	50
WP_009901962.1	hypothetical protein	94	49	45
WP_009887887.1	50S ribosomal protein L4	84	45	39
WP_003422104.1	D-proline reductase (dithiol) proprotein PrdA	84	38	46
WP_003416871.1	glycine/sarcosine/betaine reductase component B subunit, GrdE	65	31	34
WP_003416023.1	phosphate propanoyltransferase	56	24	32
WP_003430598.1	ribosome recycling factor	56	28	28
WP_003421188.1	50S ribosomal protein L1	54	25	29
WP_003421121.1	30S ribosomal protein S4	53	22	31
WP_003421173.1	50S ribosomal protein L3	52	25	27
WP_003420710.1	MFS transporter	51	23	28
WP_011860916.1	translation initiation factor IF-3	47	26	21
WP_009898069.1	bifunctional acetaldehyde-CoA/alcohol dehydrogenase	40	25	15
WP_004454389.1	2-hydroxyglutaryl-CoA dehydratase	38	20	18
WP_009903412.1	SIS domain-containing protein	35	17	18
WP_003427760.1	electron transfer flavoprotein subunit beta/FixA family protein	34	18	16
WP_003418356.1	dihydropteroate synthase	34	17	17
WP_003434417.1	ribosome-associated translation inhibitor RaiA	34	17	17
WP_009898446.1	pyrroline-5-carboxylate reductase	33	16	17
contaminant_KERATIN03	no description	33	16	17
WP_009902544.1	3-methyl-2-oxobutanoate hydroxymethyltransferase	32	22	10
WP_003437840.1	uracil phosphoribosyltransferase	32	15	17
WP_003421187.1	50S ribosomal protein L10	31	15	16
WP_003429271.1	PLP-dependent aminotransferase family protein	31	16	15
WP_003428442.1	3-oxoacyl-[acyl-carrier-protein] reductase	30	17	13
WP_009887863.1	elongation factor Tu	30	12	18
WP_003428343.1	hypothetical protein	29	15	14
WP_003427766.1	isocaprenoyl-CoA:2-hydroxyisocaproate CoA-transferase HadA	29	14	15
WP_003436172.1	SDR family oxidoreductase	28	14	14
WP_003434148.1	triose-phosphate isomerase	28	17	11
WP_003420866.1	NAD-specific glutamate dehydrogenase	28	13	15
contaminant_KERATIN13	no description	28	13	15
WP_003427762.1	acyl-CoA dehydrogenase family protein	28	15	13
WP_011861888.1	D-proline reductase (dithiol) protein PrdB	27	13	14
WP_009901573.1	adenylate kinase	26	12	14
WP_003417102.1	ATP-dependent Clp endopeptidase proteolytic subunit ClpP	26	14	12
WP_004454531.1	TerD family protein	25	11	14
WP_003431873.1	proline reductase-associated electron transfer protein PrdC	25	11	14
WP_003435668.1	50S ribosomal protein L6	25	14	11
contaminant_KERATIN22	no description	25	14	11
WP_009897862.1	pyruvate:ferredoxin (flavodoxin) oxidoreductase	25	11	14
WP_003435129.1	lactate utilization protein	24	12	12
WP_003432265.1	cyclodeaminase/cyclohydrolase family protein	24	12	12
WP_003425850.1	F0F1 ATP synthase subunit beta	24	10	14
WP_003439413.1	shikimate kinase	23	14	9
WP_009903853.1	GerMN domain-containing protein	23	10	13
WP_003430302.1	TerD family protein	23	11	12
WP_003420711.1	2-oxoacid:acceptor oxidoreductase family protein	23	12	11
WP_009898301.1	phosphopyruvate hydratase	23	12	11
WP_009902140.1	nitroreductase	23	10	13
WP_003429162.1	orotidine-5'-phosphate decarboxylase	22	11	11
WP_003421197.1	FAD-dependent thymidylate synthase	22	14	8
WP_009901804.1	TIGR04100 family radical SAM protein	22	12	10
WP_003421190.1	transcription termination/antitermination factor NusG	21	10	11
WP_003435816.1	DUF1847 domain-containing protein	21	10	11
WP_004454137.1	MBL fold metallo-hydrolase	21	8	13
WP_003435562.1	serine--tRNA ligase	21	13	8
WP_003423115.1	fructose-6-phosphate aldolase	20	9	11
WP_009888867.1	electron transfer flavoprotein subunit beta/FixA family protein	20	10	10
WP_003421962.1	type I glyceraldehyde-3-phosphate dehydrogenase	20	12	8
WP_009902802.1	shikimate dehydrogenase	20	11	9
WP_009893687.1	YggS family pyridoxal phosphate-dependent enzyme	20	11	9
WP_004454042.1	serine dehydratase subunit alpha family protein	20	12	8
WP_003439345.1	deoxyribose-phosphate aldolase	19	8	11
WP_003420269.1	TerD family protein	19	8	11
WP_003434301.1	nitroreductase family protein	19	9	10
WP_003428771.1	cyclase family protein	18	9	9
WP_003439494.1	TerD family protein	17	10	7
WP_003426928.1	DivIVA domain-containing protein	17	7	10
WP_003434107.1	MetQ/NlpA family ABC transporter substrate-binding protein	17	7	10
WP_003418513.1	rubrerythrin family protein	17	8	9
contaminant_KERATIN02	no description	17	11	6
WP_009897948.1	cell wall-binding cysteine protease Cwp84	17	8	9
WP_003420839.1	redox-sensing transcriptional repressor Rex	16	6	10
WP_003430597.1	UMP kinase	16	6	10
WP_004454633.1	xanthine phosphoribosyltransferase	16	8	8
WP_009889023.1	elongation factor P	16	9	7
WP_009889364.1	tyrosine--tRNA ligase	16	8	8
WP_003429565.1	phosphoglycerate kinase	16	8	8
WP_009897922.1	phosphoenolpyruvate--protein phosphotransferase	16	7	9
WP_009891688.1	hypoxanthine phosphoribosyltransferase	15	8	7
WP_003434098.1	pyrroline-5-carboxylate reductase	15	7	8
WP_003420702.1	butyrate kinase	15	10	5
WP_009888019.1	anaerobic carbon-monoxide dehydrogenase catalytic subunit	15	7	8
WP_003420885.1	orotate phosphoribosyltransferase	14	6	8
WP_003429416.1	GTP cyclohydrolase I FolE	14	8	6
WP_003419758.1	DUF3867 domain-containing protein	14	9	5
WP_003431138.1	ribulose-phosphate 3-epimerase	14	7	7
WP_003436669.1	bifunctional phosphoribosyl-AMP cyclohydrolase/phosphoribosyl-ATP diphosphatase HisIE	13	6	7
WP_003425288.1	amidophosphoribosyltransferase	13	5	8
WP_009889030.1	16S rRNA processing protein RimM	13	4	9
WP_003425980.1	type III pantothenate kinase	13	6	7
WP_003431407.1	D-2-hydroxyacid dehydrogenase	13	8	5
WP_004454870.1	hypothetical protein	12	6	6
WP_025992033.1	nucleotide exchange factor GrpE	12	8	4
WP_003417352.1	class II fructose-1,6-bisphosphate aldolase	12	5	7
WP_003435637.1	trypsin-like peptidase domain-containing protein	12	6	6
WP_009903260.1	HAD family hydrolase	12	8	4
WP_003423380.1	carbonic anhydrase	11	6	5
WP_003436878.1	HD domain-containing protein	11	6	5
WP_003428191.1	pyridoxamine kinase	11	4	7
WP_009892717.1	GntR family transcriptional regulator	11	5	6
WP_003422090.1	proline racemase	11	6	5
WP_009892314.1	sulfurtransferase-like selenium metabolism protein YedF	11	5	6
WP_009889331.1	helix-turn-helix transcriptional regulator	11	3	8
WP_009902542.1	lactate utilization protein	11	7	4
WP_009897956.1	cell wall-binding protein Cwp2	11	4	7
WP_003428218.1	recombinase RecA	11	7	4
WP_009903761.1	cobalt-precorrin-8 methylmutase	11	6	5
WP_003426450.1	adenine phosphoribosyltransferase	11	5	6
WP_003430074.1	TerD family protein	11	4	7
WP_003430702.1	transketolase family protein	11	8	3
WP_011861534.1	glycine reductase complex selenoprotein B	11	4	7
WP_003432442.1	3-methyl-2-oxobutanoate dehydrogenase subunit VorB	11	4	7
WP_009901735.1	phosphoribosylformylglycinamidine synthase	11	6	5
WP_003436675.1	1-(5-phosphoribosyl)-5-[(5-phosphoribosylamino)methylideneamino]imidazole-4-carboxamide isomerase	10	4	6
WP_009891793.1	4Fe-4S dicluster domain-containing protein	10	5	5
WP_003437060.1	Fe-S-containing hydro-lyase	10	6	4
WP_009903837.1	DUF488 domain-containing protein	10	7	3
WP_009902280.1	RnfABCDGE type electron transport complex subunit G	10	4	6
WP_003428245.1	NAD-dependent protein deacylase	10	4	6
WP_003420072.1	NADPH-dependent glutamate synthase	10	5	5
WP_003429190.1	ATP-binding cassette domain-containing protein	10	6	4
WP_003436178.1	elongation factor G	10	7	3
WP_009902143.1	formate C-acetyltransferase	10	4	6
WP_003431170.1	guanylate kinase	9	4	5
WP_003436064.1	phosphoribosylglycinamide formyltransferase	9	3	6
WP_009890640.1	DUF4342 domain-containing protein	9	4	5
WP_003422659.1	V-type ATP synthase subunit E	9	5	4
WP_003424537.1	30S ribosomal protein S2	9	4	5
WP_003434191.1	peptidylprolyl isomerase	9	5	4
WP_009895750.1	cell division protein ZapA	9	5	4
WP_003434506.1	dihydroorotate dehydrogenase electron transfer subunit	9	4	5
WP_009892132.1	GntR family transcriptional regulator	9	6	3
WP_003419057.1	septum site-determining protein MinD	9	4	5
WP_003416703.1	helix-turn-helix transcriptional regulator	9	5	4
WP_009901694.1	nickel pincer cofactor biosynthesis protein LarB	9	5	4
contaminant_KERATIN05	no description	9	4	5
WP_009887855.1	23S rRNA (guanosine(2251)-2'-O)-methyltransferase RlmB	9	3	6
WP_003438268.1	GTP-sensing pleiotropic transcriptional regulator CodY	9	4	5
WP_003418888.1	acyl-CoA dehydrogenase	9	7	2
WP_003432207.1	transporter substrate-binding domain-containing protein	9	5	4
WP_003416253.1	zinc metallopeptidase	9	5	4
contaminant_KERATIN17	no description	9	5	4
WP_003436400.1	FAD-dependent oxidoreductase	9	5	4
WP_003429754.1	ABC transporter ATP-binding protein	8	4	4
WP_003439113.1	lipoprotein	8	3	5
WP_003424711.1	sporulation transcription factor Spo0A	8	2	6
WP_003433936.1	amino acid ABC transporter substrate-binding protein	8	3	5
WP_009898087.1	pentapeptide repeat-containing protein	8	5	3
WP_009901929.1	ABC transporter ATP-binding protein	8	3	5
WP_009888868.1	acetyl-CoA C-acetyltransferase	8	5	3
WP_009901734.1	bifunctional phosphoribosylaminoimidazolecarboxamide formyltransferase/IMP cyclohydrolase	8	4	4
WP_003437082.1	D-3-phosphoglycerate dehydrogenase	8	4	4
WP_003424455.1	response regulator transcription factor	8	2	6
WP_003438030.1	nitroreductase family protein	8	4	4
WP_009903196.1	ribosome-associated translation inhibitor RaiA	7	4	3
WP_009890262.1	GNAT family N-acetyltransferase	7	2	5
WP_003432205.1	amino acid ABC transporter ATP-binding protein	7	4	3
WP_003437039.1	glucosamine-6-phosphate deaminase	7	4	3
WP_009888223.1	2-hydroxyisocaproyl-CoA dehydratase activator HadI	7	4	3
WP_003421168.1	50S ribosomal protein L2	7	3	4
WP_004454512.1	TerD family protein	7	3	4
WP_009891775.1	ribosome biogenesis GTP-binding protein YihA/YsxC	7	4	3
WP_003429730.1	50S ribosomal protein L20	7	3	4
WP_003417347.1	electron transfer flavoprotein subunit alpha/FixB family protein	7	4	3
WP_009902569.1	imidazoleglycerol-phosphate dehydratase HisB	7	4	3
WP_003421125.1	30S ribosomal protein S13	6	4	2
WP_003437525.1	NUDIX hydrolase	6	5	1
WP_003421148.1	30S ribosomal protein S8	6	2	4
WP_009902539.1	TlpA family protein disulfide reductase	6	3	3
WP_003416528.1	uracil-DNA glycosylase	6	3	3
WP_003438808.1	4-hydroxy-tetrahydrodipicolinate reductase	6	3	3
WP_009903671.1	proline reductase cluster protein PrdD	6	2	4
WP_009891957.1	cobalt-precorrin-4 methyltransferase	6	3	3
WP_003425856.1	F0F1 ATP synthase subunit delta	6	4	2
WP_003422204.1	transcription elongation factor GreA	6	1	5
WP_003430209.1	Mrp/NBP35 family ATP-binding protein	6	3	3
WP_009890867.1	cell division protein FtsZ	6	3	3
WP_009896496.1	sulfide/dihydroorotate dehydrogenase-like FAD/NAD-binding protein	6	3	3
WP_003418897.1	3-hydroxybutyryl-CoA dehydrogenase	6	3	3
WP_009897537.1	ketoacyl-ACP synthase III family protein	6	2	4
WP_009890976.1	polysaccharide deacetylase family protein	6	3	3
WP_004454888.1	nitroreductase family protein	6	4	2
WP_003424529.1	isoprenyl transferase	6	4	2
WP_009903233.1	alanine--glyoxylate aminotransferase family protein	6	3	3
WP_003419125.1	enoyl-[acyl-carrier-protein] reductase FabK	6	3	3
WP_009890721.1	threonine ammonia-lyase	6	3	3
WP_003437079.1	DUF1015 domain-containing protein	6	3	3
WP_003435194.1	ATP-dependent chaperone ClpB	6	5	1
WP_004454488.1	flavodoxin family protein	5	2	3
WP_003438469.1	GntR family transcriptional regulator	5	2	3
WP_009892113.1	thymidylate kinase	5	2	3
WP_011861621.1	peptidoglycan editing factor PgeF	5	2	3
WP_009891708.1	DUF4364 family protein	5	2	3
WP_004454497.1	sugar O-acetyltransferase	5	3	2
WP_009896192.1	cysteine desulfurase NifS	5	4	1
WP_003421163.1	30S ribosomal protein S3	5	2	3
WP_003428573.1	electron transfer flavoprotein subunit alpha/FixB family protein	5	2	3
WP_003438534.1	Cof-type HAD-IIB family hydrolase	5	2	3
WP_003427763.1	(R)-2-hydroxyisocaproyl-CoA dehydratase subunit beta	5	2	3
WP_003422953.1	serine hydroxymethyltransferase	5	2	3
WP_009897209.1	lipoprotein	5	3	2
WP_009888533.1	formate--tetrahydrofolate ligase	5	3	2
WP_003421367.1	F0F1 ATP synthase subunit alpha	5	3	2
WP_003429132.1	6-phosphofructokinase	5	3	2
WP_003421180.1	30S ribosomal protein S7	4	1	3
WP_003421175.1	30S ribosomal protein S10	4	0	4
WP_003422320.1	ferredoxin	4	3	1
WP_003430626.1	fructose-6-phosphate aldolase	4	1	3
WP_003428889.1	carboxymuconolactone decarboxylase family protein	4	1	3
WP_003430279.1	tRNA pseudouridine(38-40) synthase TruA	4	3	1
WP_009895920.1	GntR family transcriptional regulator	4	1	3
WP_004454825.1	recombination regulator RecX	4	2	2
WP_003431048.1	bis(5'-nucleosyl)-tetraphosphatase (symmetrical) YqeK	4	2	2
WP_009891694.1	TSUP family transporter	4	1	3
WP_003420966.1	phosphoribosylaminoimidazolesuccinocarboxamide synthase	4	2	2
WP_009897329.1	transporter substrate-binding domain-containing protein	4	3	1
WP_009902004.1	hydrolase	4	2	2
WP_009902937.1	TetR/AcrR family transcriptional regulator	4	3	1
WP_009902785.1	1-acyl-sn-glycerol-3-phosphate acyltransferase	4	2	2
WP_003428379.1	NUDIX hydrolase	4	3	1
WP_009902469.1	cysteine hydrolase	4	2	2
WP_009902687.1	lipoprotein	4	1	3
WP_009903399.1	C-GCAxxG-C-C family protein	4	1	3
WP_003421122.1	30S ribosomal protein S11	4	2	2
WP_003417965.1	helix-turn-helix transcriptional regulator	4	1	3
WP_003438024.1	helix-turn-helix domain-containing protein	4	3	1
contaminant_KERATIN08	no description	4	3	1
WP_109277183.1	peptidoglycan-binding protein	4	2	2
WP_003436909.1	bifunctional enoyl-CoA hydratase/phosphate acetyltransferase	4	1	3
WP_003438086.1	FadR family transcriptional regulator	4	2	2
WP_009891012.1	hypothetical protein	4	1	3
WP_003434235.1	protein jag	4	2	2
WP_009903270.1	low-specificity L-threonine aldolase	4	3	1
WP_009901770.1	iron-containing alcohol dehydrogenase	4	1	3
WP_009901809.1	(R)-2-hydroxyisocaproyl-CoA dehydratase subunit HadB	4	3	1
WP_003424103.1	coenzyme F420-0:L-glutamate ligase	4	1	3
WP_009897952.1	cell wall-binding repeat-containing protein	4	2	2
WP_009903738.1	pyruvate kinase	4	2	2
WP_003439746.1	tRNA-binding protein	4	2	2
WP_009888725.1	4Fe-4S dicluster domain-containing protein	4	2	2
WP_009902746.1	cell wall-binding cysteine protease Cwp13	4	2	2
WP_009902118.1	anaerobic carbon-monoxide dehydrogenase catalytic subunit	4	2	2
WP_003436174.1	DNA-directed RNA polymerase subunit beta	4	2	2
WP_009897881.1	amidohydrolase	4	2	2
WP_003424083.1	hypothetical protein	3	2	1
WP_003436912.1	methylenetetrahydrofolate reductase C-terminal domain-containing protein	3	2	1
WP_003421138.1	30S ribosomal protein S5	3	1	2
WP_009888020.1	4Fe-4S dicluster domain-containing protein	3	2	1
WP_003437730.1	precorrin-6A reductase	3	3	0
WP_009890358.1	alpha/beta hydrolase	3	2	1
WP_009896932.1	response regulator transcription factor	3	1	2
WP_009902007.1	TetR/AcrR family transcriptional regulator	3	2	1
WP_003437561.1	hypothetical protein	3	2	1
WP_003426952.1	TetR/AcrR family transcriptional regulator	3	1	2
WP_003436678.1	imidazole glycerol phosphate synthase subunit HisH	3	2	1
WP_003416451.1	RidA family protein	3	2	1
WP_009903818.1	P1 family peptidase	3	0	3
WP_003421448.1	ribose-phosphate pyrophosphokinase	3	1	2
WP_009902281.1	septum formation inhibitor Maf	3	2	1
WP_009888460.1	response regulator transcription factor	3	1	2
WP_003437218.1	alpha/beta hydrolase	3	2	1
WP_009901961.1	carbon-nitrogen hydrolase family protein	3	3	0
WP_003436788.1	carbon-nitrogen hydrolase family protein	3	2	1
WP_009891147.1	YhbD family protein	3	2	1
WP_009902717.1	radical SAM protein	3	1	2
WP_009903755.1	precorrin-3B C(17)-methyltransferase	3	2	1
WP_009897033.1	YdcF family protein	3	1	2
WP_003426384.1	response regulator transcription factor	3	1	2
WP_003434069.1	cell division protein	3	2	1
WP_009896073.1	C40 family peptidase	3	2	1
WP_009892576.1	NAD(P)/FAD-dependent oxidoreductase	3	1	2
WP_003436372.1	ABC transporter ATP-binding protein	3	1	2
WP_009902455.1	LamB/YcsF family protein	3	2	1
WP_003430084.1	toxic anion resistance protein	3	1	2
WP_003437174.1	NfeD family protein	3	2	1
WP_009901935.1	response regulator transcription factor	3	2	1
WP_003431186.1	bifunctional pyr operon transcriptional regulator/uracil phosphoribosyltransferase PyrR	3	1	2
WP_003437965.1	enoyl-CoA hydratase/isomerase family protein	3	1	2
WP_009901692.1	chaperonin GroEL	3	1	2
WP_003437535.1	NAD(+) synthase	3	1	2
WP_003434446.1	ABC transporter ATP-binding protein	3	1	2
WP_003416006.1	hypoxanthine phosphoribosyltransferase	3	1	2
WP_003418348.1	AAA family ATPase	3	2	1
WP_009897928.1	cell wall-binding glycosyl-hydrolase Cwp19	3	3	0
WP_009903328.1	cell wall-binding protein Cwp10	3	2	1
WP_003438103.1	beta-ketoacyl-ACP synthase II	3	1	2
WP_003435635.1	glucose-6-phosphate isomerase	3	2	1
WP_003417090.1	trigger factor	3	1	2
WP_003430157.1	NAD(P)/FAD-dependent oxidoreductase	3	2	1
WP_003428430.1	GNAT family N-acetyltransferase	3	1	2
WP_003425341.1	glutamine-hydrolyzing GMP synthase	3	2	1
WP_009889571.1	nucleoside hydrolase	3	1	2
WP_009898730.1	M20/M25/M40 family metallo-hydrolase	3	2	1
WP_009895182.1	proline--tRNA ligase	3	1	2
WP_004453528.1	S1 RNA-binding domain-containing protein	3	2	1
WP_003418363.1	glycine cleavage system protein GcvH	2	2	0
WP_009902250.1	phosphodiesterase	2	0	2
WP_003430159.1	NifB/NifX family molybdenum-iron cluster-binding protein	2	2	0
WP_003436135.1	zinc metalloprotease Zmp1	2	2	0
WP_003429152.1	nitroreductase family protein	2	1	1
WP_009894741.1	hypothetical protein	2	1	1
WP_009897067.1	transcriptional repressor LexA	2	1	1
WP_009895825.1	YigZ family protein	2	2	0
WP_009901540.1	recombination mediator RecR	2	1	1
WP_004454662.1	ABC transporter substrate-binding protein	2	2	0
WP_003428415.1	transcription antitermination factor NusB	2	2	0
WP_009901472.1	zinc ribbon domain-containing protein	2	1	1
WP_003416656.1	glycine--tRNA ligase subunit alpha	2	2	0
WP_003438096.1	acetate kinase	2	1	1
WP_032507408.1	diphthine--ammonia ligase	2	1	1
WP_003416187.1	5'-methylthioadenosine/adenosylhomocysteine nucleosidase	2	1	1
WP_003438150.1	glycosyltransferase family 2 protein	2	1	1
WP_003421155.1	50S ribosomal protein L14	2	1	1
WP_003428740.1	acetyl-CoA carboxylase biotin carboxyl carrier protein	2	1	1
WP_009902534.1	DUF1002 domain-containing protein	2	1	1
WP_003420701.1	phosphate butyryltransferase	2	0	2
WP_009902040.1	4Fe-4S binding protein	2	0	2
WP_009888951.1	polyprenyl synthetase family protein	2	1	1
WP_009902648.1	hydroxyethylthiazole kinase	2	1	1
WP_004454386.1	TetR/AcrR family transcriptional regulator	2	1	1
WP_009902568.1	ATP phosphoribosyltransferase	2	1	1
WP_009897890.1	cell wall-binding protein Cwp22	2	1	1
WP_009903855.1	16S rRNA (guanine(527)-N(7))-methyltransferase RsmG	2	1	1
WP_009893498.1	GNAT family N-acetyltransferase	2	1	1
WP_003430774.1	ABC transporter permease	2	1	1
WP_003421389.1	peptide chain release factor 1	2	1	1
WP_009903754.1	porphobilinogen synthase	2	1	1
WP_003422061.1	aspartate-semialdehyde dehydrogenase	2	1	1
WP_003439548.1	amino acid ABC transporter substrate-binding protein	2	1	1
WP_009895388.1	energy-coupling factor ABC transporter permease	2	1	1
WP_003438242.1	alpha-hydroxy-acid oxidizing protein	2	1	1
WP_009901543.1	elongation factor G	2	2	0
contaminant_KERATIN12	no description	2	1	1
WP_004454390.1	2-hydroxyacyl-CoA dehydratase	2	1	1
WP_003427657.1	nicotinate phosphoribosyltransferase	2	1	1
WP_003416869.1	thioredoxin-disulfide reductase	2	1	1
WP_003418385.1	DeoR/GlpR transcriptional regulator	2	1	1
WP_003421130.1	type I methionyl aminopeptidase	2	1	1
WP_003435581.1	glutamate--tRNA ligase	2	1	1
WP_009903017.1	threonine synthase	2	1	1
WP_009897501.1	phosphoglucomutase	2	1	1
WP_009897942.1	N-acetylmuramoyl-L-alanine amidase	2	1	1
WP_009902401.1	leucyl aminopeptidase	2	1	1
WP_003436882.1	aminoacyl-histidine dipeptidase	2	1	1
WP_009890612.1	pyruvate, phosphate dikinase	2	1	1
WP_025992040.1	2,3-bisphosphoglycerate-independent phosphoglycerate mutase	2	1	1
WP_004454985.1	ABC transporter substrate-binding protein	2	1	1
WP_003429485.1	DNA-directed RNA polymerase subunit beta'	2	1	1

## Sheet: MM_BHIS Spectral Counts
accession	description	Total spec count	HeavySpec	LightSpec
WP_009897960.1	S-layer protein SlpA	187	102	85
WP_003419930.1	NADH peroxidase	128	78	50
WP_009889371.1	NADH peroxidase	112	65	47
WP_009887887.1	50S ribosomal protein L4	109	43	66
WP_003435673.1	50S ribosomal protein L5	104	43	61
WP_003421173.1	50S ribosomal protein L3	103	35	68
WP_003416871.1	glycine/sarcosine/betaine reductase component B subunit, GrdE	86	42	44
contaminant_KERATIN03	no description	77	49	28
WP_003422104.1	D-proline reductase (dithiol) proprotein PrdA	76	35	41
WP_003416023.1	phosphate propanoyltransferase	73	33	40
contaminant_KERATIN13	no description	71	48	23
WP_003421121.1	30S ribosomal protein S4	68	18	50
WP_003430598.1	ribosome recycling factor	62	30	32
contaminant_KERATIN22	no description	62	47	15
WP_009901962.1	hypothetical protein	55	52	3
WP_011860916.1	translation initiation factor IF-3	53	22	31
WP_009903412.1	SIS domain-containing protein	52	24	28
WP_009901573.1	adenylate kinase	50	21	29
WP_003421188.1	50S ribosomal protein L1	49	18	31
WP_003427766.1	isocaprenoyl-CoA:2-hydroxyisocaproate CoA-transferase HadA	47	11	36
WP_003421187.1	50S ribosomal protein L10	45	24	21
WP_003437840.1	uracil phosphoribosyltransferase	45	16	29
WP_003427762.1	acyl-CoA dehydrogenase family protein	44	14	30
WP_009898069.1	bifunctional acetaldehyde-CoA/alcohol dehydrogenase	44	22	22
WP_003423115.1	fructose-6-phosphate aldolase	43	21	22
WP_003430302.1	TerD family protein	41	17	24
WP_003435668.1	50S ribosomal protein L6	39	10	29
WP_003434417.1	ribosome-associated translation inhibitor RaiA	39	15	24
WP_003427760.1	electron transfer flavoprotein subunit beta/FixA family protein	38	17	21
WP_003420710.1	MFS transporter	38	17	21
WP_003417102.1	ATP-dependent Clp endopeptidase proteolytic subunit ClpP	38	14	24
WP_004454389.1	2-hydroxyglutaryl-CoA dehydratase	37	15	22
WP_009897952.1	cell wall-binding repeat-containing protein	37	2	35
WP_009893687.1	YggS family pyridoxal phosphate-dependent enzyme	36	18	18
WP_003421190.1	transcription termination/antitermination factor NusG	35	11	24
WP_003436172.1	SDR family oxidoreductase	35	15	20
WP_009898446.1	pyrroline-5-carboxylate reductase	35	16	19
WP_003425850.1	F0F1 ATP synthase subunit beta	35	7	28
WP_003420866.1	NAD-specific glutamate dehydrogenase	35	21	14
WP_003428442.1	3-oxoacyl-[acyl-carrier-protein] reductase	34	14	20
WP_009897862.1	pyruvate:ferredoxin (flavodoxin) oxidoreductase	34	11	23
WP_003439113.1	lipoprotein	33	15	18
WP_009887863.1	elongation factor Tu	33	17	16
WP_009892132.1	GntR family transcriptional regulator	32	12	20
WP_003435129.1	lactate utilization protein	32	17	15
WP_003439345.1	deoxyribose-phosphate aldolase	31	13	18
WP_009890640.1	DUF4342 domain-containing protein	30	18	12
WP_025992033.1	nucleotide exchange factor GrpE	29	6	23
WP_003420839.1	redox-sensing transcriptional repressor Rex	28	12	16
WP_011861888.1	D-proline reductase (dithiol) protein PrdB	28	11	17
contaminant_KERATIN02	no description	28	17	11
WP_003420711.1	2-oxoacid:acceptor oxidoreductase family protein	28	16	12
WP_003439494.1	TerD family protein	27	11	16
WP_003428771.1	cyclase family protein	27	16	11
WP_003428343.1	hypothetical protein	27	13	14
WP_004454042.1	serine dehydratase subunit alpha family protein	27	19	8
WP_003430597.1	UMP kinase	26	10	16
WP_004454633.1	xanthine phosphoribosyltransferase	26	11	15
WP_003429271.1	PLP-dependent aminotransferase family protein	26	16	10
WP_009902143.1	formate C-acetyltransferase	26	6	20
WP_004454531.1	TerD family protein	25	16	9
WP_003427763.1	(R)-2-hydroxyisocaproyl-CoA dehydratase subunit beta	25	5	20
WP_003431407.1	D-2-hydroxyacid dehydrogenase	25	11	14
WP_003418356.1	dihydropteroate synthase	25	20	5
WP_009889023.1	elongation factor P	25	10	15
WP_003439413.1	shikimate kinase	24	21	3
contaminant_KERATIN05	no description	24	14	10
WP_003424537.1	30S ribosomal protein S2	23	11	12
WP_003418513.1	rubrerythrin family protein	23	7	16
WP_003419758.1	DUF3867 domain-containing protein	23	12	11
WP_009897922.1	phosphoenolpyruvate--protein phosphotransferase	23	12	11
WP_009903853.1	GerMN domain-containing protein	22	13	9
WP_003422204.1	transcription elongation factor GreA	22	11	11
WP_004454137.1	MBL fold metallo-hydrolase	22	12	10
WP_009888223.1	2-hydroxyisocaproyl-CoA dehydratase activator HadI	22	3	19
WP_003434098.1	pyrroline-5-carboxylate reductase	22	14	8
WP_003434301.1	nitroreductase family protein	22	8	14
WP_009902140.1	nitroreductase	22	11	11
WP_003425980.1	type III pantothenate kinase	21	11	10
WP_009898301.1	phosphopyruvate hydratase	21	9	12
WP_009901804.1	TIGR04100 family radical SAM protein	20	17	3
WP_003426928.1	DivIVA domain-containing protein	20	12	8
WP_009901694.1	nickel pincer cofactor biosynthesis protein LarB	20	6	14
WP_003420269.1	TerD family protein	20	11	9
WP_003417347.1	electron transfer flavoprotein subunit alpha/FixB family protein	20	7	13
WP_009897956.1	cell wall-binding protein Cwp2	20	9	11
WP_003435194.1	ATP-dependent chaperone ClpB	20	3	17
WP_009892314.1	sulfurtransferase-like selenium metabolism protein YedF	19	9	10
WP_003428245.1	NAD-dependent protein deacylase	19	10	9
WP_003424529.1	isoprenyl transferase	19	9	10
WP_003435816.1	DUF1847 domain-containing protein	19	11	8
WP_009897948.1	cell wall-binding cysteine protease Cwp84	19	10	9
WP_009901929.1	ABC transporter ATP-binding protein	18	6	12
WP_003425856.1	F0F1 ATP synthase subunit delta	18	7	11
WP_009891688.1	hypoxanthine phosphoribosyltransferase	17	7	10
WP_003421197.1	FAD-dependent thymidylate synthase	17	4	13
WP_009895750.1	cell division protein ZapA	17	5	12
WP_003436178.1	elongation factor G	17	9	8
WP_003421962.1	type I glyceraldehyde-3-phosphate dehydrogenase	17	11	6
WP_009888019.1	anaerobic carbon-monoxide dehydrogenase catalytic subunit	17	11	6
contaminant_KERATIN17	no description	17	11	6
WP_009888867.1	electron transfer flavoprotein subunit beta/FixA family protein	16	11	5
WP_003420885.1	orotate phosphoribosyltransferase	16	11	5
WP_003416703.1	helix-turn-helix transcriptional regulator	16	6	10
WP_003429190.1	ATP-binding cassette domain-containing protein	16	7	9
WP_003437451.1	pyruvate formate lyase-activating protein	15	0	15
WP_009903837.1	DUF488 domain-containing protein	15	3	12
WP_003434235.1	protein jag	15	8	7
WP_009903196.1	ribosome-associated translation inhibitor RaiA	15	5	10
WP_003430626.1	fructose-6-phosphate aldolase	15	11	4
WP_009890358.1	alpha/beta hydrolase	15	5	10
WP_003438024.1	helix-turn-helix domain-containing protein	14	4	10
WP_009903761.1	cobalt-precorrin-8 methylmutase	14	7	7
WP_003417352.1	class II fructose-1,6-bisphosphate aldolase	14	10	4
WP_009902542.1	lactate utilization protein	14	9	5
WP_003424103.1	coenzyme F420-0:L-glutamate ligase	14	9	5
WP_003431873.1	proline reductase-associated electron transfer protein PrdC	14	12	2
WP_003432442.1	3-methyl-2-oxobutanoate dehydrogenase subunit VorB	14	7	7
WP_003436400.1	FAD-dependent oxidoreductase	14	11	3
WP_009891775.1	ribosome biogenesis GTP-binding protein YihA/YsxC	13	5	8
WP_003426450.1	adenine phosphoribosyltransferase	13	4	9
WP_032507408.1	diphthine--ammonia ligase	13	6	7
WP_003434148.1	triose-phosphate isomerase	13	9	4
WP_009892717.1	GntR family transcriptional regulator	13	6	7
WP_009902469.1	cysteine hydrolase	13	7	6
WP_003416528.1	uracil-DNA glycosylase	13	6	7
WP_003439746.1	tRNA-binding protein	13	6	7
WP_003432265.1	cyclodeaminase/cyclohydrolase family protein	13	8	5
WP_009901809.1	(R)-2-hydroxyisocaproyl-CoA dehydratase subunit HadB	13	4	9
WP_003416253.1	zinc metallopeptidase	13	5	8
WP_003428218.1	recombinase RecA	13	3	10
WP_009901692.1	chaperonin GroEL	13	5	8
WP_009903738.1	pyruvate kinase	13	7	6
WP_003429754.1	ABC transporter ATP-binding protein	12	5	7
WP_009903855.1	16S rRNA (guanine(527)-N(7))-methyltransferase RsmG	12	3	9
WP_003429162.1	orotidine-5'-phosphate decarboxylase	12	11	1
WP_003429416.1	GTP cyclohydrolase I FolE	12	10	2
WP_009903260.1	HAD family hydrolase	12	5	7
WP_003416006.1	hypoxanthine phosphoribosyltransferase	12	5	7
WP_009901862.1	salicylate synthase	12	0	12
WP_003436878.1	HD domain-containing protein	12	4	8
WP_004454512.1	TerD family protein	12	7	5
WP_003423380.1	carbonic anhydrase	12	8	4
WP_009887855.1	23S rRNA (guanosine(2251)-2'-O)-methyltransferase RlmB	12	4	8
WP_003431170.1	guanylate kinase	11	6	5
WP_009898403.1	ImmA/IrrE family metallo-endopeptidase	11	1	10
WP_009898087.1	pentapeptide repeat-containing protein	11	2	9
WP_009895825.1	YigZ family protein	11	4	7
WP_003434936.1	SEC-C domain-containing protein	11	6	5
WP_003421168.1	50S ribosomal protein L2	11	6	5
WP_003436669.1	bifunctional phosphoribosyl-AMP cyclohydrolase/phosphoribosyl-ATP diphosphatase HisIE	11	7	4
WP_009903755.1	precorrin-3B C(17)-methyltransferase	11	7	4
WP_009896932.1	response regulator transcription factor	11	5	6
WP_003430074.1	TerD family protein	11	4	7
WP_003417965.1	helix-turn-helix transcriptional regulator	11	5	6
WP_003428474.1	FprA family A-type flavoprotein	11	5	6
WP_003431138.1	ribulose-phosphate 3-epimerase	11	6	5
WP_003435562.1	serine--tRNA ligase	11	9	2
WP_003420702.1	butyrate kinase	11	3	8
WP_003438469.1	GntR family transcriptional regulator	10	6	4
WP_003436912.1	methylenetetrahydrofolate reductase C-terminal domain-containing protein	10	10	0
WP_003436064.1	phosphoribosylglycinamide formyltransferase	10	9	1
WP_009888750.1	alanine--glyoxylate aminotransferase family protein	10	10	0
WP_003422090.1	proline racemase	10	9	1
WP_009897067.1	transcriptional repressor LexA	10	5	5
WP_003431048.1	bis(5'-nucleosyl)-tetraphosphatase (symmetrical) YqeK	10	7	3
WP_009896192.1	cysteine desulfurase NifS	10	2	8
WP_003418888.1	acyl-CoA dehydrogenase	10	2	8
WP_003434107.1	MetQ/NlpA family ABC transporter substrate-binding protein	10	8	2
WP_003419125.1	enoyl-[acyl-carrier-protein] reductase FabK	10	4	6
contaminant_KERATIN21	no description	10	6	4
WP_009902950.1	DUF4878 domain-containing protein	10	6	4
WP_009902783.1	histidine phosphatase family protein	9	5	4
WP_009895920.1	GntR family transcriptional regulator	9	4	5
WP_003419057.1	septum site-determining protein MinD	9	3	6
WP_003438166.1	O-methyltransferase	9	3	6
WP_003425288.1	amidophosphoribosyltransferase	9	9	0
WP_003436675.1	1-(5-phosphoribosyl)-5-[(5-phosphoribosylamino)methylideneamino]imidazole-4-carboxamide isomerase	9	6	3
WP_009889364.1	tyrosine--tRNA ligase	9	9	0
WP_003421180.1	30S ribosomal protein S7	9	5	4
WP_009889331.1	helix-turn-helix transcriptional regulator	9	3	6
WP_004454646.1	aldehyde dehydrogenase family protein	9	0	9
WP_003421163.1	30S ribosomal protein S3	9	5	4
WP_009891694.1	TSUP family transporter	9	6	3
WP_003434191.1	peptidylprolyl isomerase	8	7	1
WP_009891793.1	4Fe-4S dicluster domain-containing protein	8	7	1
WP_003430806.1	indolepyruvate oxidoreductase subunit beta	8	0	8
WP_003421125.1	30S ribosomal protein S13	8	6	2
WP_003432205.1	amino acid ABC transporter ATP-binding protein	8	5	3
WP_009903721.1	DJ-1/PfpI family protein	8	1	7
WP_004454770.1	tRNA threonylcarbamoyladenosine dehydratase	8	1	7
WP_009888460.1	response regulator transcription factor	8	2	6
WP_003438808.1	4-hydroxy-tetrahydrodipicolinate reductase	8	3	5
WP_009902280.1	RnfABCDGE type electron transport complex subunit G	8	4	4
WP_009901734.1	bifunctional phosphoribosylaminoimidazolecarboxamide formyltransferase/IMP cyclohydrolase	8	8	0
contaminant_KERATIN04	no description	8	6	2
WP_003434976.1	YbhB/YbcL family Raf kinase inhibitor-like protein	7	6	1
WP_003434506.1	dihydroorotate dehydrogenase electron transfer subunit	7	4	3
WP_009902785.1	1-acyl-sn-glycerol-3-phosphate acyltransferase	7	6	1
WP_009888208.1	hydrolase	7	1	6
WP_004454825.1	recombination regulator RecX	7	3	4
WP_009901695.1	nickel pincer cofactor biosynthesis protein LarC	7	3	4
WP_003428379.1	NUDIX hydrolase	7	3	4
WP_003429565.1	phosphoglycerate kinase	7	4	3
WP_003428430.1	GNAT family N-acetyltransferase	7	3	4
WP_004454488.1	flavodoxin family protein	7	4	3
WP_009903270.1	low-specificity L-threonine aldolase	7	1	6
WP_009891957.1	cobalt-precorrin-4 methyltransferase	7	3	4
WP_009901770.1	iron-containing alcohol dehydrogenase	7	3	4
WP_003422061.1	aspartate-semialdehyde dehydrogenase	7	2	5
WP_003421367.1	F0F1 ATP synthase subunit alpha	7	2	5
WP_009888868.1	acetyl-CoA C-acetyltransferase	7	4	3
WP_003438030.1	nitroreductase family protein	7	4	3
WP_009890867.1	cell division protein FtsZ	7	4	3
WP_009888725.1	4Fe-4S dicluster domain-containing protein	7	5	2
WP_009890612.1	pyruvate, phosphate dikinase	7	3	4
WP_009901735.1	phosphoribosylformylglycinamidine synthase	7	7	0
WP_009902539.1	TlpA family protein disulfide reductase	6	6	0
WP_003438917.1	hypothetical protein	6	1	5
WP_003436678.1	imidazole glycerol phosphate synthase subunit HisH	6	5	1
WP_009892113.1	thymidylate kinase	6	2	4
WP_003434069.1	cell division protein	6	4	2
WP_009889030.1	16S rRNA processing protein RimM	6	2	4
WP_003437730.1	precorrin-6A reductase	6	3	3
WP_003435637.1	trypsin-like peptidase domain-containing protein	6	6	0
WP_003421448.1	ribose-phosphate pyrophosphokinase	6	0	6
WP_003430702.1	transketolase family protein	6	3	3
WP_003438268.1	GTP-sensing pleiotropic transcriptional regulator CodY	6	2	4
WP_004454888.1	nitroreductase family protein	6	4	2
WP_003436558.1	SGNH/GDSL hydrolase family protein	6	4	2
WP_009901675.1	response regulator transcription factor	6	0	6
WP_004454870.1	hypothetical protein	6	2	4
WP_003418897.1	3-hydroxybutyryl-CoA dehydrogenase	6	4	2
WP_004454497.1	sugar O-acetyltransferase	6	2	4
WP_003429730.1	50S ribosomal protein L20	6	5	1
WP_009892576.1	NAD(P)/FAD-dependent oxidoreductase	6	4	2
WP_009888558.1	amino acid ABC transporter permease	6	6	0
WP_011861534.1	glycine reductase complex selenoprotein B	6	4	2
WP_003424711.1	sporulation transcription factor Spo0A	6	1	5
WP_009895854.1	alpha-hydroxy-acid oxidizing protein	6	2	4
WP_009902746.1	cell wall-binding cysteine protease Cwp13	6	2	4
WP_003422659.1	V-type ATP synthase subunit E	5	5	0
WP_009891708.1	DUF4364 family protein	5	3	2
WP_003421148.1	30S ribosomal protein S8	5	1	4
WP_009901472.1	zinc ribbon domain-containing protein	5	4	1
WP_003416187.1	5'-methylthioadenosine/adenosylhomocysteine nucleosidase	5	4	1
WP_003438086.1	FadR family transcriptional regulator	5	3	2
WP_003424535.1	elongation factor Ts	5	4	1
WP_004454386.1	TetR/AcrR family transcriptional regulator	5	1	4
WP_009901871.1	thioesterase	5	0	5
WP_003420966.1	phosphoribosylaminoimidazolesuccinocarboxamide synthase	5	5	0
WP_003421194.1	NYN domain-containing protein	5	2	3
WP_009903233.1	alanine--glyoxylate aminotransferase family protein	5	5	0
WP_003435254.1	CoA pyrophosphatase	5	2	3
WP_009893310.1	3-dehydroquinate synthase	5	5	0
WP_009903228.1	TetR/AcrR family transcriptional regulator	5	2	3
WP_003424455.1	response regulator transcription factor	5	2	3
WP_009897033.1	YdcF family protein	5	0	5
WP_009903713.1	DUF3786 domain-containing protein	5	2	3
WP_003416451.1	RidA family protein	5	2	3
WP_009890976.1	polysaccharide deacetylase family protein	5	4	1
WP_004454472.1	response regulator transcription factor	5	1	4
WP_109277183.1	peptidoglycan-binding protein	5	3	2
WP_009895182.1	proline--tRNA ligase	5	0	5
WP_009902192.1	cell wall-binding protein Cwp25	5	2	3
WP_009897890.1	cell wall-binding protein Cwp22	5	0	5
WP_004453528.1	S1 RNA-binding domain-containing protein	5	3	2
WP_003436863.1	NADP-dependent glyceraldehyde-3-phosphate dehydrogenase	5	0	5
WP_025992040.1	2,3-bisphosphoglycerate-independent phosphoglycerate mutase	5	4	1
WP_009902648.1	hydroxyethylthiazole kinase	5	2	3
contaminant_KERATIN06	no description	5	2	3
WP_003417090.1	trigger factor	5	2	3
WP_009903754.1	porphobilinogen synthase	5	4	1
WP_009895388.1	energy-coupling factor ABC transporter permease	5	1	4
WP_003428889.1	carboxymuconolactone decarboxylase family protein	4	4	0
WP_003433947.1	4Fe-4S binding protein	4	0	4
WP_009902544.1	3-methyl-2-oxobutanoate hydroxymethyltransferase	4	3	1
WP_009902937.1	TetR/AcrR family transcriptional regulator	4	1	3
WP_009897329.1	transporter substrate-binding domain-containing protein	4	4	0
WP_009892068.1	aminoacyl-tRNA hydrolase	4	0	4
WP_003437525.1	NUDIX hydrolase	4	3	1
WP_009892015.1	5-formyltetrahydrofolate cyclo-ligase	4	3	1
WP_003436215.1	tRNA-binding protein	4	0	4
WP_003428486.1	RnfABCDGE type electron transport complex subunit B	4	0	4
WP_003430209.1	Mrp/NBP35 family ATP-binding protein	4	0	4
WP_009902004.1	hydrolase	4	3	1
WP_009898664.1	decarboxylating cobalt-precorrin-6B (C(15))-methyltransferase	4	1	3
WP_009902276.1	dephospho-CoA kinase	4	1	3
WP_009893498.1	GNAT family N-acetyltransferase	4	2	2
WP_003427737.1	energy-coupling factor transporter transmembrane protein EcfT	4	2	2
WP_009889131.1	peptidylprolyl isomerase	4	3	1
WP_003420704.1	hypothetical protein	4	2	2
WP_003432361.1	response regulator transcription factor	4	4	0
WP_004454936.1	TetR/AcrR family transcriptional regulator	4	1	3
WP_009896073.1	C40 family peptidase	4	3	1
WP_009902665.1	PepSY domain-containing protein	4	2	2
WP_003430581.1	[FeFe] hydrogenase H-cluster radical SAM maturase HydG	4	4	0
WP_003421155.1	50S ribosomal protein L14	4	2	2
WP_003439902.1	transglutaminase domain-containing protein	4	0	4
WP_009903818.1	P1 family peptidase	4	1	3
WP_009890262.1	GNAT family N-acetyltransferase	4	3	1
WP_003418769.1	helix-turn-helix transcriptional regulator	4	1	3
WP_004454662.1	ABC transporter substrate-binding protein	4	4	0
WP_003437218.1	alpha/beta hydrolase	4	2	2
WP_003438357.1	pyridoxal phosphate-dependent aminotransferase	4	2	2
WP_003437535.1	NAD(+) synthase	4	2	2
WP_011861621.1	peptidoglycan editing factor PgeF	4	3	1
WP_003421160.1	50S ribosomal protein L16	4	3	1
WP_004454829.1	hypothetical protein	4	2	2
WP_009891147.1	YhbD family protein	4	3	1
WP_009897942.1	N-acetylmuramoyl-L-alanine amidase	4	4	0
WP_009890721.1	threonine ammonia-lyase	4	1	3
WP_003425341.1	glutamine-hydrolyzing GMP synthase	4	2	2
WP_003430934.1	molecular chaperone DnaK	4	1	3
WP_003420072.1	NADPH-dependent glutamate synthase	4	3	1
WP_003430084.1	toxic anion resistance protein	4	3	1
WP_003437523.1	HEAT repeat domain-containing protein	4	1	3
WP_003429300.1	membrane protein insertase YidC	4	2	2
WP_003437079.1	DUF1015 domain-containing protein	4	4	0
WP_009903328.1	cell wall-binding protein Cwp10	4	1	3
WP_009896496.1	sulfide/dihydroorotate dehydrogenase-like FAD/NAD-binding protein	4	2	2
WP_009902401.1	leucyl aminopeptidase	4	2	2
WP_003436174.1	DNA-directed RNA polymerase subunit beta	4	1	3
WP_003428780.1	RNA chaperone Hfq	3	0	3
WP_009903436.1	DUF523 domain-containing protein	3	3	0
WP_003428191.1	pyridoxamine kinase	3	3	0
WP_003435654.1	tRNA pseudouridine(38-40) synthase TruA	3	0	3
WP_009902250.1	phosphodiesterase	3	1	2
WP_003430279.1	tRNA pseudouridine(38-40) synthase TruA	3	0	3
WP_009901935.1	response regulator transcription factor	3	2	1
WP_003436212.1	ATP-dependent Clp endopeptidase proteolytic subunit ClpP	3	2	1
WP_003428415.1	transcription antitermination factor NusB	3	0	3
WP_003419857.1	Fis family transcriptional regulator	3	3	0
WP_003437899.1	16S rRNA (adenine(1518)-N(6)/adenine(1519)-N(6))-dimethyltransferase RsmA	3	0	3
WP_003438473.1	helix-turn-helix transcriptional regulator	3	2	1
WP_009888339.1	DUF975 family protein	3	3	0
WP_009898500.1	epoxyqueuosine reductase	3	1	2
WP_003439979.1	GntR family transcriptional regulator	3	1	2
WP_003437060.1	Fe-S-containing hydro-lyase	3	3	0
WP_003419111.1	DUF177 domain-containing protein	3	2	1
WP_003436788.1	carbon-nitrogen hydrolase family protein	3	0	3
WP_003429806.1	XRE family transcriptional regulator	3	1	2
WP_004454998.1	flavodoxin family protein	3	0	3
WP_009902687.1	lipoprotein	3	2	1
WP_009902802.1	shikimate dehydrogenase	3	3	0
WP_009903387.1	hypothetical protein	3	0	3
WP_003433741.1	AIM24 family protein	3	0	3
WP_003421122.1	30S ribosomal protein S11	3	2	1
WP_003421079.1	HAD-IB family hydrolase	3	2	1
WP_003434259.1	adenylosuccinate synthase	3	3	0
WP_009902717.1	radical SAM protein	3	1	2
WP_009891044.1	sugar transferase	3	1	2
WP_003435799.1	HAD family hydrolase	3	1	2
WP_003428573.1	electron transfer flavoprotein subunit alpha/FixB family protein	3	2	1
WP_003416661.1	IclR family transcriptional regulator	3	0	3
WP_022618489.1	hypothetical protein	3	1	2
WP_003438096.1	acetate kinase	3	1	2
WP_003436062.1	phosphoribosylamine--glycine ligase	3	3	0
WP_009902682.1	cupin domain-containing protein	3	2	1
WP_003428740.1	acetyl-CoA carboxylase biotin carboxyl carrier protein	3	1	2
WP_009902019.1	hypothetical protein	3	1	2
WP_003426952.1	TetR/AcrR family transcriptional regulator	3	1	2
WP_009897856.1	ABC transporter permease	3	2	1
WP_003423106.1	IMP dehydrogenase	3	2	1
WP_003429132.1	6-phosphofructokinase	3	2	1
WP_009903017.1	threonine synthase	3	3	0
WP_003420701.1	phosphate butyryltransferase	3	1	2
WP_004454132.1	gamma carbonic anhydrase family protein	3	2	1
WP_009902527.1	ferrous iron transport protein B	3	0	3
WP_003421389.1	peptide chain release factor 1	3	2	1
WP_003428216.1	ribonuclease Y	3	2	1
WP_009897537.1	ketoacyl-ACP synthase III family protein	3	1	2
WP_009902521.1	cell wall-binding protein Cwp20	3	0	3
WP_003437464.1	DEAD/DEAH box helicase	3	0	3
WP_009902000.1	threonine--tRNA ligase	3	2	1
WP_009888509.1	phenylalanine--tRNA ligase subunit beta	3	1	2
WP_003435635.1	glucose-6-phosphate isomerase	3	1	2
WP_009902118.1	anaerobic carbon-monoxide dehydrogenase catalytic subunit	3	2	1
WP_003421137.1	50S ribosomal protein L30	2	1	1
WP_003422320.1	ferredoxin	2	1	1
WP_009889225.1	cysteine hydrolase	2	1	1
WP_009889887.1	MarR family transcriptional regulator	2	2	0
WP_003439687.1	hypothetical protein	2	2	0
WP_003426034.1	ABC transporter ATP-binding protein	2	0	2
WP_003436135.1	zinc metalloprotease Zmp1	2	2	0
WP_003436372.1	ABC transporter ATP-binding protein	2	1	1
WP_003434455.1	ABC transporter ATP-binding protein	2	0	2
WP_003431186.1	bifunctional pyr operon transcriptional regulator/uracil phosphoribosyltransferase PyrR	2	1	1
WP_009896849.1	molybdenum cofactor guanylyltransferase	2	2	0
WP_009902007.1	TetR/AcrR family transcriptional regulator	2	2	0
WP_009902281.1	septum formation inhibitor Maf	2	1	1
WP_025992035.1	PTS glucose transporter subunit IIA	2	2	0
WP_003438150.1	glycosyltransferase family 2 protein	2	0	2
WP_009891012.1	hypothetical protein	2	2	0
WP_009889910.1	tRNA (guanosine(46)-N7)-methyltransferase TrmB	2	0	2
WP_009897880.1	pentapeptide repeat-containing protein	2	1	1
WP_003439993.1	gamma-glutamyl-gamma-aminobutyrate hydrolase family protein	2	0	2
WP_009901986.1	effector binding domain-containing protein	2	1	1
WP_003425290.1	5-(carboxyamino)imidazole ribonucleotide mutase	2	2	0
WP_003430699.1	ribulose-phosphate 3-epimerase	2	1	1
WP_003432207.1	transporter substrate-binding domain-containing protein	2	1	1
WP_003436909.1	bifunctional enoyl-CoA hydratase/phosphate acetyltransferase	2	2	0
WP_003436401.1	VanG-Cd-type vancomycin resistance DNA-binding response regulator VanR	2	0	2
WP_003431108.1	16S rRNA (guanine(966)-N(2))-methyltransferase RsmD	2	2	0
WP_009898085.1	GyrI-like domain-containing protein	2	0	2
WP_003421138.1	30S ribosomal protein S5	2	2	0
WP_004454566.1	response regulator transcription factor	2	0	2
WP_003419115.1	transcription factor FapR	2	0	2
WP_003435191.1	hypothetical protein	2	0	2
WP_009896372.1	2-amino-4-hydroxy-6-hydroxymethyldihydropteridine diphosphokinase	2	1	1
WP_009898027.1	HAD family phosphatase	2	0	2
WP_009903112.1	aspartate/glutamate racemase family protein	2	0	2
WP_009901578.1	pyridoxal phosphate-dependent aminotransferase	2	2	0
WP_003427733.1	DNA-directed RNA polymerase subunit alpha	2	1	1
WP_003433936.1	amino acid ABC transporter substrate-binding protein	2	2	0
WP_003437965.1	enoyl-CoA hydratase/isomerase family protein	2	1	1
WP_003422953.1	serine hydroxymethyltransferase	2	2	0
WP_003428341.1	ribonuclease III	2	0	2
WP_009903671.1	proline reductase cluster protein PrdD	2	2	0
WP_003436795.1	phenylalanine--tRNA ligase subunit alpha	2	1	1
WP_003429376.1	MgtC/SapB family protein	2	1	1
WP_009888951.1	polyprenyl synthetase family protein	2	1	1
WP_004454415.1	helix-turn-helix domain-containing protein	2	1	1
WP_009901733.1	phosphoribosylformylglycinamidine cyclo-ligase	2	2	0
WP_009889262.1	SAM-dependent methyltransferase	2	1	1
WP_004454985.1	ABC transporter substrate-binding protein	2	1	1
WP_009901581.1	anaerobic ribonucleoside triphosphate reductase	2	0	2
WP_009903427.1	response regulator transcription factor	2	0	2
WP_003439900.1	proline iminopeptidase-family hydrolase	2	1	1
WP_003430157.1	NAD(P)/FAD-dependent oxidoreductase	2	1	1
WP_003426384.1	response regulator transcription factor	2	1	1
WP_003432446.1	glutamine--fructose-6-phosphate transaminase (isomerizing)	2	0	2
WP_003424384.1	flavodoxin family protein	2	1	1
WP_009902635.1	alpha/beta hydrolase	2	1	1
WP_009888533.1	formate--tetrahydrofolate ligase	2	2	0
WP_003438534.1	Cof-type HAD-IIB family hydrolase	2	1	1
WP_009897939.1	glycosyl transferase	2	1	1
WP_009903155.1	glycine/betaine reductase C	2	1	1
WP_003436292.1WP_009903205.1	ABC transporter ATP-binding protein sn-glycerol-3-phosphate ABC transporter ATP-binding protein UgpC	2	0	2
WP_009903471.1	M20 family metallopeptidase	2	1	1
WP_003432462.1	methionine adenosyltransferase	2	1	1
WP_009902078.1	methyltransferase domain-containing protein	2	1	1
WP_004453621.1	phosphoribosylaminoimidazolecarboxamide formyltransferase	2	1	1
WP_009902154.1	transglycosylase domain-containing protein	2	2	0
WP_003438306.1	translation initiation factor IF-2	2	1	1
WP_009901787.1	putative manganese-dependent inorganic diphosphatase	2	1	1
WP_003436882.1	aminoacyl-histidine dipeptidase	2	1	1
