# Supplementary material for: Characterizing metabolic drivers of Clostridioides difficile infection with activity-based hydrazine probes
Source: Front Pharmacol. 2023 Jan 26;14:1074619. doi: 10.3389/fphar.2023.1074619 (PMC9908766; doi:10.3389/fphar.2023.1074619)
Supplement: Supplementary file 4 [file DataSheet1.xlsx]

## Sheet: Summary
Supplementary Dataset 1. Compiled average protein ratios with standard deviations for enrichment and competition experiments with probes 1 and 2 for Clostridioides difficile VPI10463 strain cultivated in BHIS. Representative datasets for each type of experiment are also included. These datasets are shown in separate tabs (4 in total), each displaying median ReDiMe ratios for all quantified trypti…

## Sheet: Average Ratios Probe 1
Group	VPI10463			630			protein class	enzyme class	Heavy:Light Ratio
									Average		Standard Deviation
	Accession	uniprot ID	symbol	Uniprot ID	symbol	description			Probe 1 (alkyl)		Probe 1 (alkyl)
									Enrichment	Competition	Enrichment	Competition
											n=4	n=4
high-reactivity targets: enrichment ratio ≥ 8 and competition ratio ≥ 2	WP_003420711.1	A0A031WCI5	porC_3	Q18CK6	CD630_01180	Putative ferredoxin/flavodoxin oxidoreductase,gamma subunit	enzyme	oxidoreductase	20	1.775	0	0.0777817
	WP_003421122.1	A0A031WBS4	rpsK	Q18CI7	rpsK	30S ribosomal protein S11	other		20	1.86
	WP_003421148.1	A0A031W9P0	rpsH	Q18CH0	rpsH	30S ribosomal protein S8	other		20	1.585	0	0.244609
	WP_003421107.1	A0A031WA25	rplM	Q18CJ1	rplM	50S ribosomal protein L13	other		20	1.535	0	0.3751
	WP_009887887.1	A0A031WAP2	rplD	Q18CF9	rplD	50S ribosomal protein L4	other		20	1.54		0.18
	WP_009888868.1	A0A031WJ40	mmgA/thlA	Q18AR0	thlA	Acetyl-CoA acetyltransferase	enzyme	transferase	20	1.7625		0.340429
	WP_003418655.1	A0A031WHS9	speH	Q18A81	speH	S-adenosylmethionine decarboxylase proenzyme	enzyme	lyase	20	5.115	0	2.04354
	WP_003439524.1	A0A031WIK3	argG	Q186Z6	argG	Argininosuccinate synthase	enzyme	ligase	20	2.08	0
	WP_009896192.1	A0A160WY74	iscS_2	Q18BE4	iscS2	Cysteine desulfurase IscS	enzyme	transferase	20	1.5475	0	0.36782
	WP_009902397.1		NifU (iscU)	Q18BE3	CD630_12800	Fe-s iron-sulfur cluster assembly protein, nifu family	adapter,scaffolding, modular proteins		20	1.6	0	0.238607
	WP_003428474.1	A0A031WH65	fprA/norV	Q18B19	norV	Anaerobic nitric oxide reductase flavorubredoxin	enzyme	oxidoreductase	20	1.5025	0	0.320975
	WP_003425341.1	A0A031WEK2	guaA	Q18CT8	guaA	GMP synthase [glutamine-hydrolyzing]	enzyme	ligase	20	1.50667		0.207926
	WP_003416871.1	A0A031WJU5	grdE	Q185M5	GrdE	glycine reductase complex component B subunits alpha and beta (Selenoprotein PB alpha/beta)	enzyme	oxidoreductase	20	1.9375	0	0.440785
	WP_003421415.1	A0A031WHB1	hbs/hup	Q180Z4	hupA	Non-specific DNA-binding protein HBsu signal recognition particle-like (SRP) component	transcription factor and regulators		20	1.64		0.523259
	WP_003424083.1	A0A031WES6	erpA	Q187Q3	CD630_19430	Uncharacterized protein	unclassified		20	1.91	0	0.710422
	WP_003421158.1	A0A031W9Y6	rpmC	Q18CG9	rpmC	50S ribosomal protein L29	other		14.65	1.72
	WP_003420866.1	P27346	gluD	Q18CS0	gluD	Glutamate dehydrogenase	enzyme	oxidoreductase	16.13	1.5625	6.70304	0.297027
	WP_032506644.1	A0A657JW07	cdgr_03340	Q185Q7	CD630_21200	Putative 2-nitropropane dioxygenase	enzyme	oxidoreductase	20	1.8
	WP_003438030.1	A0A031WG42	BN1095_450028	Q18AY4	CD630_11250	Nitroreductase-family protein	enzyme	oxidoreductase	16.6025	1.5	6.795	0.266708
	WP_003426939.1	A0A069A336	BN1095_620042	Q182V9	CD630_26260	UPF0210 protein CD630_26260	unclassified		20	5.8375	0	2.13122
	WP_003416023.1	A0A069A1Z7	pduL_1/pduL/pduL_2	Q183B8	CD630_26830	Phosphate propanoyltransferase	enzyme	transferase	20	1.5425	0	0.233862
	WP_009897922.1	A0A125V8V1	ptsI	Q183J1	ptsI	Phosphoenolpyruvate-protein phosphotransferase	enzyme	transferase	20	1.50667		0.41489
	WP_003429271.1	A0A031WGG4	lysN	Q181R8	CD630_36640	Putative aminotransferase	enzyme	transferase	20	1.685	0	0.287344
	WP_009903754.1			Q180R7	hemB	Delta-aminolevulinic acid dehydratase	enzyme	lyase	20	1.61		0.304193
	WP_003422090.1	A0A031WLJ9	prdF	Q17ZY4	CD630_32370	Proline racemase	enzyme	isomerase	20	1.5725	0	0.249983
	WP_009903738.1			Q180P2	pyk	Pyruvate kinase	enzyme	transferase	20	1.5875		0.348748
	WP_009904144.1	A0A069AXL0	mreB	Q18B05	mreB2	od shape-determining protein MreB	other		20	1.62333		0.267644
	WP_009890721.1	A0A031WHB0	tdcB	Q182J9	tdcB	Threonine dehydratase II	enzyme	lyase	20	1.6775	0	0.115
	WP_003430704.1	A0A031WJ19	tkt	Q185J6	tkt1	Transketolase, N-terminal (Sedoheptulose-7-phosphate:D-glyceraldehyde-3-phosphate glycolaldehydetransferase)	enzyme	transferase	20	1.91	0	0.75326
reactive targets: enrichment ratio ≥ 8 or competition ratio ≥ 2	WP_003427763.1	Q5U923	hadC	Q188I6	hadC	Subunit of oxygen-sensitive 2-hydroxyisocaproyl-CoA dehydratase C	enzyme	hydrolase	20	1.4225	0	0.236696
	WP_009901809.1		hadB	Q188I1	hadB	Subunit of oxygen-sensitive 2-hydroxyisocaproyl-CoA dehydratase B	enzyme	hydrolase	20	1.445	0	0.164215
	WP_004454390.1	A0A160X4Z4	bcrB	Q186V7	CD630_17490	Putative 2-hydroxyacyl-CoA dehydratase	enzyme	lyase	20	1.3525	0	0.253821
	WP_009888223.1	A0A160W6B9	hadI	Q5U925	hadI	2-hydroxyisocaproyl-CoA dehydratase activator	enzyme	hydrolase	20	1.445	0	0.263376
	WP_003421125.1	A0A031WAM3	rpsM	Q18CI0	rpsM	30S ribosomal protein S13	other		20	1.45		0.255734
	WP_003424537.1	A0A031WIT6	rpsB	Q185S8	rpsB	30S ribosomal protein S2	other		17.0325	1.4425	5.935	0.244319
	WP_003421163.1	A0A069A3T9	rpsC	Q18CG5	rpsC	30S ribosomal protein S3	other		7.8175	1.45	4.79749	0.145831
	WP_003421121.1	A0A031W9W6	rpsD	Q18CI6	rpsD	30S ribosomal protein S4	other		20	1.4125		0.197547
	WP_003421180.1	A0A031WC55	rpsG	Q18CF5	rpsG	30S ribosomal protein S7	other		20	1.45	0	0.238467
	WP_009888725.1	A0A031WGL8	BN1095_630017	Q18A87	CD630_08930	Putative iron-dependent hydrogenase	enzyme	oxidoreductase	20
	WP_003438808.1	A0A031WJY6	dapB/dapB1	Q17ZX1	dapB1	4-hydroxy-tetrahydrodipicolinate reductase	enzyme	oxidoreductase	20	1.265		0.304056
	WP_003421187.1	A0A031WA97	rplJ	Q18CE8	rplJ	50S ribosomal protein L10	other		11.83	1.41	2.30517	0.150555
	WP_003421117.1	A0A031WA29	rplQ	Q18CI8	rplQ	50S ribosomal protein L17	other		20	1.105		0.00707107
	WP_003419082.1	A0A031WIC7	rplU	Q18B24	rplU	50S ribosomal protein L21	other		20	1.41333		0.321299
	WP_003421173.1	A0A031WA51	rplC	Q18CG0	rplC	50S ribosomal protein L3	other		20	1.405	0	0.28243
	WP_003429267.1	A0A031WI13	rplI	Q181R0	rplI	50S ribosomal protein L9	other		20	1.045		0.445477
	WP_004454985.1	A0A069AL86	appA	Q183A6	appA	ABC-type transport system, oligopeptide-family solute-binding protein	channels, transporters, chaperones, and receptors		20	1.4025	0	0.379155
	WP_003438096.1	A0A031WGL1	ackA	Q18B36	ackA	Acetate kinase	enzyme	transferase	20	1.475	0	0.189297
	WP_003418888.1	A0A031WJ47	acdA	Q18AQ1	bcd2	butyryl-CoA dehydrogenase	enzyme	oxidoreductase	20	1.475	0	0.209205
	WP_003427762.1	A0A160W849	acdB	Q188I5	acdB	Acyl-CoA dehydrogenase, short-chain specific	enzyme	oxidoreductase	7.8225	1.42	1.39215	0.184029
	WP_004454646.1	A0A031WJ42	sucD	Q185L7	sucD	Succinate-semialdehyde dehydrogenase (NAD(P)+)	enzyme	oxidoreductase	20		0
	WP_003436882.1	A0A031WGH6	pepD	Q189Q4	pepD	Peptidase D, aminoacyl-histidine dipeptidase	enzyme	hydrolase	20	1.3425	0	0.0963933
	WP_009903275.1			Q182U6	CD630_26130	Putative peptidase, M24 family	enzyme	hydrolase	12.41	1.365		0.235584
	WP_009888019.1	A0A031WDM4	cooS	Q18CR1	cooS	Carbon monoxide dehydrogenase	enzyme	oxidoreductase	20	1.47	0	0.292803
	WP_003430444.1	A0A031WKP7	asnC	Q185B5	asnC	Asparagine--tRNA ligase	enzyme	ligase	20
	WP_009898069.1	A0A031WAU8	adhE	Q18D77	adhE	Aldehyde-alcohol dehydrogenase	enzyme	oxidoreductase	13.9725	1.185	7.14249	0.124499
	WP_003434815.1	A0A125VAJ3	adhE_2	Q184F6	adhE1	Aldehyde-alcohol dehydrogenase	enzyme	oxidoreductase	20	1.08
	WP_003428889.1	A0A1Q9BMW3	E5F32_14780	Q187V4	CD630_19930	Putative decarboxylase	unclassified		20		0
	WP_009890867.1	A0A657JUJ4	ftsZ	Q182X9	ftsZ	Cell division protein FtsZ	adapter,scaffolding, modular proteins		20	1.34
	WP_009897948.1	A0A125V8W5	cwp84	Q183M1	cwp84	Cell surface protein cwp84	enzyme	hydrolase	20	1.28	0	0.564269
	WP_009897956.1	A0A487GC37	lytC_18	Q183M5	cwp2	Cell wall binding protein cwp2	adapter,scaffolding, modular proteins		20	1.44	0	0.259358
	WP_009901692.1	A0A031WDG6	groL	Q18CT5	groL	60 kDa chaperonin	channels, transporters, chaperones, and receptors		17.87	1.2925	3.68927	0.189978
	WP_003417352.1	A0A031WAY2	fba	Q188J1	fba	Fructose-1,6-bisphosphate aldolase	enzyme	lyase	14.62	1.4325	9.31843	0.156285
	WP_003418660.1	A0A031WG62	cspA	Q18A83	cspA	Cold shock protein	other		12.67	1.05
	WP_009895184.1	A0A031WDD4	cysS	Q18CD5	cysS	Cysteine--tRNA ligase	enzyme	ligase	20	1.495	0	0.544472
	WP_003431407.1	A0A031WAD6	ldhA	Q188H7	ldhA	D-lactate dehydrogenase	enzyme	oxidoreductase	18.965	1.4775	2.07	0.2136
	WP_003422749.1	A0A031WJI0	dltC	Q183T8	dltC	D-alanyl carrier protein	enzyme	ligase	20		0
	WP_003427733.1	A0A031W9M8	rpoA	Q18CI5	rpoA	DNA-directed RNA polymerase subunit alpha	enzyme	transferase	20	1.4925		0.248646
	WP_003422104.1	A0A031WJF8	prdA	Q17ZY9	prdA	D-proline reductase proprotein	enzyme	oxidoreductase	20	1.4075	0	0.254214
	WP_011861888.1	A0A500UG65	prdB	Q17ZY6	prdB	Proline reductase (Selenocysteine)	enzyme	oxidoreductase	20	1.34	0	0.167929
	WP_003417347.1	A0A031WA87	etfA	Q188I8	etfA1	Alpha-subunit of electron transfer flavoprotein	enzyme	oxidoreductase	8.215	1.385	1.69781	0.144799
	WP_003427760.1	A0A031W9Z3	etfB	Q188I4	etfB1	Beta-subunit of electron transfer flavoprotein	enzyme	oxidoreductase	13.375	1.4475	5.82966	0.164393
	WP_003436178.1	A0A031WAZ7	fusA	Q18CF4	fusA	Elongation factor G	transcription factor and regulators		18.425	1.4275	3.15	0.168003
	WP_003424535.1	A0A031WJ99	tsf	Q185S9	tsf	Elongation factor Ts	transcription factor and regulators		17.225	1.485	5.55	0.231876
	WP_009887863.1	A0A160W555	tuf_2/tuf1	Q18CE4	tuf1	Elongation factor Tu	transcription factor and regulators		16.9725	1.42	6.055	0.179258
	WP_003425850.1	A0A031WHJ3	atpD	Q180W5	atpD	ATP synthase subunit beta	enzyme	translocase	10.67	1.285	13.1946	0.202237
	WP_003436400.1	A0A450R375	E5F43_14400	Q186H7	CD630_16230	Putative oxidoreductase	enzyme	oxidoreductase	17.055	1.35	5.89	0.160831
	WP_009902921.1	Q93QY9	flxD	Q187W1	flxD	flavodoxin	channels, transporters, chaperones, and receptors		20	1.46	0
	WP_009902143.1	A0A3T1G435	plfb	Q189V5	plfb	Formate acetyltransferase (Pyruvate formate-lyase)	enzyme	transferase	20	1.4175	0	0.178209
	WP_003435635.1	A0A3T1GFQ9	pgi	Q180C9	pgi	Glucose-6-phosphate isomerase	enzyme	isomerase	20	1.335	0	0.185023
	WP_003432446.1	A0A031WEL3	glmS	Q18CK9	glmS	Glutamine--fructose-6-phosphate aminotransferase [isomerizing]	enzyme	transferase	20	1.36	0	0.145831
	WP_009903219.1		hisC_1	Q182I8	CD630_25020	Putative pyridoxal phosphate-dependent transferase	enzyme	transferase	20
	WP_003423106.1	A0A031WJB8	guaB	Q185K9	guaB	Inositol-5'-monophosphate dehydrogenase (IMP dehydrogenase) (IMPDH) (IMPD)	enzyme	oxidoreductase	20	1.3		0.198494
	WP_003427766.1	A0A031W9Y8	hadA	Q188I3	hadA	Isocaprenoyl-CoA:2-hydroxyisocaproate CoA-transferase	enzyme	transferase	17.1125	1.38	5.775	0.196129
	WP_003435867.1	A0A6N4MXQ7	metG	Q181D9	metG	Methionine--tRNA ligase	enzyme	ligase	20	1.09
	WP_003420710.1	A0A031WCZ3	porB_2	Q18CK7	CD630_01170	Putative ferredoxin/flavodoxin oxidoreductase,beta subunit	enzyme	oxidoreductase	20	1.49		0.278747
	WP_003430934.1	A0A031WHV7	dnaK	Q182E8	dnaK	chaperone protein DnaK	channels, transporters, chaperones, and receptors		20	1.4725	0	0.275847
	WP_003430209.1	A0A031WHU8	mrp	Q186T9	CD630_17300	Iron-sulfur cluster carrier protein	enzyme	hydrolase	20
	WP_003421166.1	A0A031W9P7	rpsS	Q18CG2	rpsS	30S ribosomal protein S19	other		14.04	1.12
	WP_003430157.1	A0A031WHN3	trxB	Q186P9	trxB	Putative thioredoxin-disulfide reductase	enzyme	oxidoreductase	20	1.305		0.487904
	WP_003419930.1	A0A160WBD4	rbr3A_1	Q18BZ4	CD630_14740	Putative rubrerythrin (Rr)	enzyme	oxidoreductase	20	1.3975	0	0.135
	WP_009889371.1	A0A031WCC0	rbr3A_2	Q18C45	CD630_15240	Putative rubrerythrin	enzyme	oxidoreductase	20	1.42	0	0.145831
	WP_003430159.1	A0A031WIJ0	BN1095_470139	Q186Q2	CD630_16930	Putative dinitrogenase iron-molybdenum cofacto	other		20	1.4125	0	0.278971
	WP_009889571.1	A0A069A9M6	iunH	Q186N9	iunH	Putative nucleoside hydrolase, IUNH family	enzyme	hydrolase	20	1.4475	0	0.189275
	WP_003439110.1	A0A161KPQ0	E5F32_11340	Q188Y6	CD630_05440	Putative ornithine cyclodeaminase	enzyme	lyase	20	1.155		0.0494975
	WP_009889131.1	A0A031WFI6	cbf2	Q18BM5	CD630_13570	Peptidylprolyl isomerase	enzyme	isomerase	20	1.3125	0	0.256694
	WP_003429565.1	A0A031WJX1	pgk	Q181T8	pgk	Phosphoglycerate kinase	enzyme	transferase	20	1.345	0	0.189297
	WP_009898301.1	A0A031WK46	eno	Q181T5	eno	Enolase	enzyme	lyase	19.16	1.395	1.68	0.182665
	WP_009895182.1	A0A031WDK1	proS	Q18CD2	proS1	Proline--tRNA ligase 1	enzyme	ligase	18.53	1.4425	2.94	0.183916
	WP_009895180.1	A0A031WE17	proS	Q18CD7	proS2	Proline--tRNA ligase 2	enzyme	ligase	20		0
	WP_009901787.1	A0A160WT52	ppaC	Q18D73	ppaC	Putative inorganic pyrophosphatase	enzyme	hydrolase	20	1.32		0.296142
	WP_003438357.1	A0A031WH88	aspB	Q18BK6	aspB	Aminotransferase	enzyme	transferase	15.06	1.4225		0.293641
	WP_009897862.1	A0A160X9W3	porA_3/NifJ/pfo	Q183B6	pfo	Pyruvate-ferredoxin oxidoreductase	enzyme	oxidoreductase	20	1.4825	0	0.199395
	WP_003416451.1	A0A031WH02	yabJ	Q182K0	CD630_25130	Putative translation inhibitor endoribonuclease	unclassified		17.66	1.485	3.30926	0.232164
	WP_004454042.1	A0A449MTZ8	cdgr_03985	Q17ZX7	CD630_32320	UPF0597 protein CD630_32320	unclassified		20	1.44	0	0.112842
	WP_009897960.1	Q9AEM3	slpA	Q183M8	slpA	Precursor of the S-layer proteins	adapter,scaffolding, modular proteins		10.76	1.315	1.70946	0.313741
	WP_003420269.1	A0A031WHM7	terD	Q186I7	terD	Tellurium resistance protein terD	adapter,scaffolding, modular proteins		20		0
	WP_003420374.1	A0A031WHY9	trxA	Q186P6	trxA	thioredoxin	enzyme	oxidoreductase	20	1.21667	0	0.337095
	WP_004453775.1	A0A031WH83	trxA/trxA1	Q184M2	trxA1	Thioredoxin	enzyme	oxidoreductase	20
	WP_003430702.1	A0A031WIR0	tkt	Q185J5	tkt	Transketolase, central and C-terminal (Sedoheptulose-7-phosphate:D-glyceraldehyde-3-phosphate glycolaldehydetransferase)	enzyme	transferase	20	1.455	0	0.211424
	WP_003438306.1	A0A031WCZ0	infB	Q18BH4	infB	Translation initiation factor IF-2	transcription factor and regulators		20	1.03333		0.292803
	WP_011860916.1	A0A500WW32	infC	Q189N1	infC	Translation initiation factor IF-3	transcription factor and regulators		20	1.405		0.120208
	WP_003417090.1	A0A069AUG4	tig	Q180E9	tig	Trigger factor	enzyme	isomerase	18.0567	1.3425	3.36595	0.173853
	WP_003434148.1	A0A031WLR9	tpiA/tpi	Q181T6	tpi	Triosephosphate isomerase	enzyme	isomerase	20	1.435	0	0.142009
	WP_003421962.1	A0A031WJM9	gapA	Q181T9	gapA	Glyceraldehyde-3-phosphate dehydrogenase	enzyme	oxidoreductase	14.98	1.415	6.52532	0.214398
	WP_003420522.1	A0A031WGW1	rpsF	Q181R5	rpsF	30S ribosomal protein S6	other			1.73
	WP_003418897.1	A0A031WJD8	mmgB/hbd	Q18AQ7	hbd	3-hydroxybutyryl-CoA dehydrogenase	enzyme	oxidoreductase		1.78333		0.180093
	WP_003432442.1	A0A031WDH6	porA_2	Q18CK8	CD630_01160	Putative ferredoxin/flavodoxin oxidoreductase,alpha subunit	enzyme	oxidoreductase		1.56667		0.361709
	WP_003421188.1	A0A031WA03	rplA	Q18CE9	rplA	50S ribosomal protein L1	other			1.7775		0.575579
	WP_003435668.1	A0A031WA41	rplF	Q18CH5	rplF	50S ribosomal protein L6	other			1.51333		0.122202
	WP_003428740.1	A0A069AT81	accB	Q187Q0	accB	Biotin carboxyl carrier protein of acetyl-CoA carboxylase	channels, transporters, chaperones, and receptors		0.965	1.725	0.179351	0.922479
	WP_003435334.1	A0A031WEA4	accC	Q187P8	accC	Biotin carboxylase	enzyme	ligase		1.82
	WP_009901573.1			Q18CH9	adk	Adenylate kinase	enzyme	transferase		1.5475		0.222467
	WP_009889064.1	A0A031WD86	alaS	Q18BE7	alaS	Alanine--tRNA ligase	enzyme	ligase		1.86
	WP_003436885.1	A0A031WFU6	argS	Q189Q7	argS	Arginine--tRNA ligase	enzyme	ligase		2.23
	WP_004454140.1	A0A031WF33	aspS	Q183H4	aspS	Aspartate--tRNA ligase	enzyme	ligase		1.525		0.0353553
	WP_003420702.1	A0A031WCI2	buk	Q18CK3	buk	Probable butyrate kinase	enzyme	transferase		1.68		0.0916515
	WP_009902521.1			Q18BY9	cwp20	Putative cell surface protein putative penicillin-binding protein cwp20	adapter, scaffolding, modulator proteins			1.56333		0.0321455
	WP_003429485.1	A0A031WAF8	rpoB	Q18CF1	rpoB	DNA-directed RNA polymerase subunit beta	enzyme	transferase		1.57		0.141421
	WP_009903252.1			Q182N4	CD630_25470	DUF4091 domain-containing protein	adapter,scaffolding, modular proteins			1.54
	WP_009888867.1	A0A031WJM1	etfB	Q18AQ6	etfB3	Electron transfer flavoproteins subunit beta	channels, transporters, chaperones, and receptors			1.83
	WP_003428488.1	A0A069AUQ9	rnfC	Q18AZ5	rnfC	Ion-translocating oxidoreductase complex subunit C	enzyme	translocase		1.705		0.00707107
	WP_003421197.1	A0A069ASQ1	thyX	Q18CE1	thyX	Flavin-dependent thymidylate synthase	enzyme	transferase		1.96
	WP_003438917.1	A0A346WRW8	cdgr_06650	Q189E0	CD630_05920	Uncharacterized protein	unclassified			1.6325		0.231858
	WP_003437561.1	A0A031WCV8	BN1095_790035	Q18BA8	CD630_12470	Uncharacterized protein	unclassified			1.77
	WP_004454939.1	A0A2A4BRI4	ileS	Q182V2	ileS	Isoleucine--tRNA ligase	enzyme	ligase		1.54		0.0848528
	WP_003422058.1	A0A161KSB2	sdaB	Q17ZW7	sdaB	L-serine dehydratase	enzyme	lyase		1.665		0.0212132
	WP_025992020.1			Q189L6	CD630_06720	GTP cyclohydrolase 1 type 2 homolog	unclassified			1.775		0.120208
	WP_025992033.1			Q182F1	grpE	Protein GrpE	channels, transporters, chaperones, and receptors			1.695		0.0919239
	WP_003421389.1	A0A031WJF2	prfA	Q180Y2	prfA	Peptide chain release factor 1	transcription factor and regulators			1.61
	WP_003420701.1	A0A031WCY9	ptb	Q18CK4	ptb	Phosphate butyryltransferase	enzyme	transferase		1.58
	WP_009901585.1			Q18CL0	glmM	Phosphoglucosamine mutase	enzyme	isomerase		1.7		0.39598
	WP_003439900.1	A0A2A3K3G5	pip	Q184M8	pip	Proline iminopeptidase	enzyme	hydrolase		1.7
	WP_009903415.1			Q184L8	CD630_30300	PTS system, glucose-like IIBC component	enzyme	transferase		1.99		0.687895
	WP_009901578.1			Q18CJ7	aspC	Aminotransferase	enzyme	transferase		1.74
	WP_009902717.1			Q186P0	CD630_16840	Putative radical SAM superfamily protein	enzyme	lyase		1.515		0.247487
	WP_003428486.1	A0A031WH48	rnfB	Q18B01	rnfB	Ion-translocating oxidoreductase complex subunit B	enzyme	translocase		1.505		0.275772
	WP_004453528.1	A0A069A180	rpsA	Q18AI4	rpsA	30S ribosomal protein S1	other			4.52		5.48473
	WP_003434936.1	A0A031WFG0	secA_2	Q181H5	CD630_35710	Uncharacterized protein	unclassified			1.63333		0.484286
	WP_009903412.1			Q184L7	CD630_30280	Putative phosphosugar isomerase	enzyme	isomerase		1.65		0.245153
	WP_009889364.1	A0A031WA86	tyrS	Q18C40	tyrS	Tyrosine--tRNA ligase	enzyme	ligase		1.5075		0.248646
	WP_003437537.1	A0A031WED6	pmpR	Q189Y9	CD630_07950	Probable transcriptional regulatory protein CD630_07950	transcription factor and regulators			1.54667		0.312143
	WP_009903660.1	A0A031WKF5	dapH	Q17ZX2	dapH	2,3,4,5-tetrahydropyridine-2,6-dicarboxylate N-acetyltransferase				1.19
	WP_025992040.1			Q181T7	gpmI	2,3-bisphosphoglycerate-independent phosphoglycerate mutase				1.425		0.148492
	WP_003421175.1	A0A069APE8	rpsJ	Q18CF6	rpsJ	ribosomal protein S10			4.1	1.4025		0.212348
	WP_003436176.1	A0A069AMB0	rpsL	Q18CF2	rpsL	30S ribosomal protein S12				1.205		0.163605
	WP_003419338.1	A0A031WDT7	rpsP	Q18BB8	rpsP	30S ribosomal protein S16				1.07
	WP_003421156.1	A0A031W9P1	rpsQ	Q18CG8	rpsQ	30S ribosomal protein S17			1.565	1.28	0.26163	0.268701
	WP_003421189.1	A0A031WAF0	rplK	Q18CE5	rplK	50S ribosomal protein L11				1.36		0.238118
	WP_003421155.1	A0A031WA45	rplN	Q18CG7	rplN	50S ribosomal protein L14				1.305		0.374767
	WP_003421135.1	A0A031W9N6	rplO	Q18CH7	rplO	50S ribosomal protein L15				1.175		0.00707107
	WP_003421160.1	A0A031WBT7	rplP	Q18CG4	rplP	50S ribosomal protein L16				1.14
	WP_003419350.1	A0A031WDB1	rplS	Q18BC1	rplS	50S ribosomal protein L19				1.38667		0.320832
	WP_003421168.1	A0A031W9Z1	rplB	Q18CG3	rplB	50S ribosomal protein L2			1.5325	1.18	0.0639661	0.170294
	WP_003429730.1	A0A160W8Z0	rplT	Q189N4	rplT	50S ribosomal protein L20			1.46	0.99	0	0.225167
	WP_003427723.1	A0A031WAN4	rplX	Q18CG6	rplX	50S ribosomal protein L24				1.47		0.363135
	WP_003421137.1	A0A031W9X5	rpmD	Q18CH8	rpmD	50S ribosomal protein L30			1.65	1.39		0.329242
	WP_003421397.1	A0A031WHA1	rpmE	Q180Y7	rpmE	50S ribosomal protein L31				1.42
	WP_003429729.1	A0A031WFF6	rpmI	Q189N0	rpmI	50S ribosomal protein L35			1.34	1.4125	0.3005	0.411289
	WP_003435673.1	A0A031WBT3	rplE	Q18CH2	rplE	50S ribosomal protein L5				1.475		0.212995
	WP_003421186.1	A0A031WC51	rplL	Q18CE7	rplL	50S ribosomal protein L7/L12				1.42333		0.432936
	WP_003429132.1	A0A031WC37	pfkA	Q180P4	pfkA	ATP-dependent 6-phosphofructokinase			2.21
	WP_003434259.1	A0A031WGF4	purA	Q181Q7	purA	Adenylosuccinate synthetase				1.04
	WP_009901581.1			Q18CJ6	nrdD	anaerobic ribonucleoside triphosphate reductase				1.4375		0.21093
	WP_003429004.1	A0A031WJ38	yheS_5	Q188D7	CD630_20680	ABC-type transport system, ATP-binding protein				1.48
	WP_003417105.1	A0A031WCN0	clpX	Q180E8	clpX	ATP-dependent Clp protease ATP-binding subunit ClpX				1.47
	WP_003438103.1	A0A031WGM3	fabF	Q18B43	fabF	3-oxoacyl-[acyl-carrier-protein] synthase 2				1.25		0.372424
	WP_003420907.1	A0A031WEJ8	groS	Q18CT6	groS	10 kDa chaperonin				1.32		0.565685
	WP_003424103.1	A0A031WE94	BN1095_310042	Q187R2	CD630_19530	F420_ligase domain-containing protein				1.39		0.167033
	WP_003419624.1	A0A031WFD5	cspD/cspB/cspA	Q18BL9	cspB	Cold shock protein CspB				1.295		0.241868
	WP_003418375.1	A0A031WHQ6	BN1095_430071	Q189T0	CD630_07340	Uncharacterized protein				0.96
	WP_003437464.1	A0A031WF96	cshA	Q189V7	CD630_07610	Putative ATP-dependent RNA helicase				1.41
	WP_003436174.1	A0A031WA07	rpoC	Q18CF3	rpoC	DNA-directed RNA polymerase subunit beta'				1.475		0.0932738
	WP_003428573.1	A0A031WK27	etfA	Q18AQ5	etfA3	Electron transfer flavoprotein subunit alpha				1.3975		0.147054
	WP_003421367.1	A0A031WI77	atpA	Q180W8	atpA	ATP synthase subunit alpha			7.47	1.34	8.98026	0.212838
	WP_003433890.1	A0A031WIP7	ftnA	Q185Y2	ftnA	Ferritin				1.38
	WP_009903195.1			Q182B8	glyS	Glycine--tRNA ligase beta subunit				1.25333		0.228546
	WP_003438268.1	A0A031WD25	codY	Q18BE1	codY	GTP-sensing transcriptional pleiotropic repressor CodY				1.45		0.480833
	WP_003428343.1	A0A031WDP1	BN1095_480039	Q18A06	CD630_08070	Uncharacterized protein				1.29
	WP_009903330.1			Q183N3	CD630_27970	Putative calcium-binding adhesion protein				1.0925		0.559367
	WP_003432462.1	A0A031WEM0	metK	Q18CL7	metK	S-adenosylmethionine synthase				1.47
	WP_009887891.1	A0A031WA47	rplV	Q18CG1	rplV	50S ribosomal protein L22				1.49667		0.320208
	WP_003422895.1	A0A031WE44	ptsH	Q183J2	ptsH	PTS system, HPr protein				1.1
	WP_009897942.1	A0A069AIN2	cwp	Q183L9	cwp6	Putative N-acetylmuramoyl-L-alanine amidase,autolysin cwp6				1.12
	WP_003436863.1	A0A6N3EL63	gapN	Q189C4	gapN	Glyceraldehyde-3-phosphate dehydrogenase (NADP(+)) (GADPH)				1.13		0.0707107
	WP_003420072.1	A0A160WCH6	gltD/aspB_1	Q18C58	aspB1	Putative glutamate synthase				1.36333		0.102144
	WP_003434191.1	A0A346WRC5	E5F43_11720	Q18D70	ppiB	Peptidyl-prolyl cis-trans isomerase				1.34		0.183848
	WP_009897501.1	A0A7G7NJJ1	DSM105001_02571	Q185J2	CD630_23180	Putative phosphohexomutase				1.24
	WP_003438316.1	A0A031WFI5	pnp	Q18BI4	pnp	Polyribonucleotide nucleotidyltransferase				1.355		0.110905
	WP_009891056.1	A0A0H3NEM5	secA2	Q183M9	secA2	Protein translocase subunit SecA 2				1.46
	WP_003431873.1	A0A031WLJ3	prdC	Q17ZZ2	prdC	Putative electron transfer protein				1.45		0.170587
	WP_003425597.1	A0A069AHU3	pycA	Q18CA4	pycA	Pyruvate carboxylase			0.8375	1.2175	0.0457347	0.191202
	WP_003428216.1	A0A031WF54	rny	Q18BJ3	rny	Ribonuclease Y				1.11
	WP_003421448.1	A0A031WIC4	prs	Q181B3	prs	Ribose-phosphate pyrophosphokinase				1.31		0.0565685
	WP_003431138.1	A0A031WAQ2	rpe/rpe1	Q182R3	rpe1	Ribulose-phosphate 3-epimerase				1.375		0.318198
	WP_003422953.1	A0A069AKK1	glyA	Q183G0	glyA	Serine hydroxymethyltransferase				1.355		0.346482
	WP_003435562.1	A0A031WFN9	serS	Q18C97	serS	Serine--tRNA ligase				1.36
	WP_009902686.1			Q186K4	CD630_16500	ABC-type transport system, iron-family extracellular substrate-binding protein				1.06
	WP_009903017.1	A0A449RV42	thrC	Q185Q9	thrC	Threonine synthase				1.37
	WP_009902000.1			Q189B8	thrS	Threonine--tRNA ligase				1.375		0.174452
	WP_003422204.1	A0A031WEF1	greA	Q181F4	greA	Transcription elongation factor GreA				0.8
	WP_003437840.1	A0A031WJE6	upp	Q180X8	upp	Uracil phosphoribosyltransferase				1.22		0.424264
	WP_009903676.1			Q180A1	valS	Valine--tRNA ligase				1.13

## Sheet: Probe 1_enrichment
Replicate 1 : probe 1–C. difficile–enrichment
Accession	description	symbol	sequence	mass	median ratio	standard deviation	charge
WP_003425597.1	pyruvate carboxylase	pyruvate			0.86	2.34	234
			K.ADMNDPLQIGASIPGK.V	1681.87	0.79		2
			K.ADMNDPLQIGASIPGK.V	1681.87	0.84		3
			K.AFGEDIIFIEK.Y	1336.73	0.86		2
			K.DLQEVVLKGEEAITVRPGSLLPAEDFDEIAK.Y	3466.87	0.99		4
			K.DMSGLLKPYSAYTLVK.E	1870.04	0.87		2
			K.DMSGLLKPYSAYTLVK.E	1870.04	0.86		3
			K.EANEVVGDIIK.V	1241.69	0.86		2
			K.EDKYGLFR.T	1082.58	0.81		2
			K.EICEDAVK.L	1018.5	0.88		2
			K.EKPLFDALHDPR.M	1492.8	0.8		3
			K.EVNVQTIPGVEK.A	1367.77	0.94		2
			K.FIDENPDLFEITESK.D	1852.92	0.88		2
			K.FIDENPDLFEITESK.D	1852.92	0.9		3
			K.FIDENPDLFEITESKDR.G	2124.05	0.75		2
			K.FIDENPDLFEITESKDR.G	2124.05	0.88		3
			K.GEEAITVRPGSLLPAEDFDEIAK.Y	2513.31	0.86		2
			K.GEEAITVRPGSLLPAEDFDEIAK.Y	2513.31	0.79		3
			K.GMIGQPEGGIPK.D	1238.67	0.79		2
			K.IIEYAPAFSLDDK.V	1536.81	0.82		2
			K.IMVKEEDEVK.A	1302.71	0.85		2
			K.INNVEKADMNDPLQIGASIPGK.V	2408.28	0.78		3
			K.IVEATMCYTGDILDK.T	1783.87	0.97		2
			K.IVEATMCYTGDILDK.T	1783.87	20		3
			K.KLLLTDTTMR.D	1246.73	0.92		2
			K.KLLLTDTTMR.D	1246.73	0.92		3
			K.KVDAIHPGYGFLAENAEFAR.K	2261.17	0.7		3
			K.KVDAIHPGYGFLAENAEFAR.K	2261.17	0.84		4
			K.LESDVFFYGLNK.N	1486.77	1.14		2
			K.LESDVFFYGLNKNEECEVEIEEGK.V	2961.4	0.79		3
			K.LLLTDTTMR.D	1090.61	0.85		2
			K.MAQELESLGADIIAIK.D	1756.96	0.72		2
			K.MAQELESLGADIIAIK.D	1756.96	0.77		3
			K.NEECEVEIEEGK.V	1519.67	0.93		2
			K.NKLDKDNIIEEGK.N	1626.92	0.86		3
			K.NLSFPDSVVDYCK.G	1598.77	0.89		2
			K.NYPDNVIEEFTK.E	1523.75	0.88		2
			K.QLLMIMK.-	931.56	0.8		2
			K.SQDDVEIR.G	988.482	1.02		2
			K.SVGIYSK.E	808.47	0.91		2
			K.TKYNLEYYIK.M	1417.79	0.87		2
			K.TKYNLEYYIK.M	1417.79	0.91		3
			K.VDAIHPGYGFLAENAEFAR.K	2105.04	0.81		3
			K.VKEDDMVEDK.Q	1290.64	0.82		2
			K.VKEDDMVEDK.Q	1290.64	0.86		3
			K.VVGDLAIFMTK.N	1248.72	0.87		2
			K.VYEDYIK.H	984.517	0.9		2
			K.VYNKFESDLTNSCAEIYNFEIPGGQYTNLKPQADSLGLVNR.F	4750.35	0.9		4
			K.YDINANIR.N	1005.52	0.98		2
			K.YKEANEVVGDIIK.V	1560.88	0.78		2
			K.YKEANEVVGDIIK.V	1560.88	0.8		3
			K.YNLEYYIK.M	1160.61	0.89		2
			R.DAHQSLLATR.I	1138.61	4.65		2
			R.DTGIDLFGYDELGK.Y	1597.79	0.85		2
			R.IFDSLNWVENMKPSINTALETGK.I	2691.4	0.6		3
			R.IVHREEDLELEYETACSESR.K	2493.15	1.02		3
			R.IVHREEDLELEYETACSESR.K	2493.15	1		4
			R.KAFGEDIIFIEK.Y	1492.85	0.7		2
			R.KAFGEDIIFIEK.Y	1492.85	0.92		3
			R.KCEENGITFIGPSSK.V	1749.9	0.96		3
			R.KEICEDAVK.L	1174.63	0.85		2
			R.KKVDAIHPGYGFLAENAEFAR.K	2417.29	0.85		3
			R.KKVDAIHPGYGFLAENAEFAR.K	2417.29	0.86		4
			R.LDGGNGFTGANISPHYDSLLVK.T	2331.19	0.88		3
			R.LVEIGEVK.E	941.58	0.92		2
			R.NVISYALYPK.V	1222.7	0.83		2
			R.QGIDVFR.I	861.471	0.9		2
			R.STEEAKEVANK.I	1288.69	0.85		2
			R.TFQGAINK.T	933.528	0.86		2
			R.TGSGFGIR.L	821.44	0.91		2
			K.ADM(15.995)NDPLQIGASIPGK.V	363.146	0		2
			K.CEENGITFIGPSSK.V	1593.77	0		2
			K.DLFSLEM(15.995)WGGATYDVAYR.F	881.42	0		2
			K.DLFSLEM(15.995)WGGATYDVAYR.F	881.42	0		3
			K.DLQEVVLK.G	998.601	0		2
			K.DLQEVVLKGEEAITVR.P	1855.05	0		2
			K.DLQEVVLKGEEAITVR.P	1855.05	0		3
			K.DLQEVVLKGEEAITVRPGSLLPAEDFDEIAK.Y	3466.87	0		3
			K.EKPLFDALHDPR.M	1492.8	0		2
			K.EVNVQTIPGVEK.A	1367.77	0		3
			K.FESDLTNSCAEIYNFEIPGGQYTNLKPQADSLGLVNR.F	4218.05	0		3
			K.FESDLTNSCAEIYNFEIPGGQYTNLKPQADSLGLVNR.F	4218.05	0		4
			K.FESDLTNSCAEIYNFEIPGGQYTNLKPQADSLGLVNRFDEVK.E	4864.38	0		4
			K.GM(15.995)IGQPEGGIPK.D	234.104	0		2
			K.GPIDAYLDMDGIIDLAK.R	1875.97	0		2
			K.GPIDAYLDMDGIIDLAK.R	1875.97	0		3
			K.HLQHYNDISK.L	1309.68	0		2
			K.HLQHYNDISK.L	1309.68	0		3
			K.HLQHYNDISKLESDVFFYGLNK.N	2751.41	0		4
			K.IIEYAPAFSLDDK.V	1536.81	0		3
			K.IIEYAPAFSLDDKVR.K	1792.98	0		3
			K.IVEATM(15.995)CYTGDILDK.T	690.362	0		2
			K.KVDAIHPGYGFLAENAEFAR.K	2261.17	0		2
			K.LDKDNIIEEGK.N	1356.75	0		2
			K.LDKDNIIEEGK.N	1356.75	0		3
			K.LLQFIGDVIVNDNACK.E	1875	0		2
			K.LLQFIGDVIVNDNACK.E	1875	0		3
			K.LREEIPSIMFQM(15.995)LLR.A	1520.77	0		3
			K.LREEIPSIMFQMLLR.A	1904.05	0		3
			K.M(15.995)AQELESLGADIIAIK.D	177.082	0		2
			K.M(15.995)AQELESLGADIIAIK.D	177.082	0		3
			K.NKLDKDNIIEEGK.N	1626.92	0		2
			K.TNVGFLVNVLNNPIFSNGK.C	2103.16	0		2
			K.VDAIHPGYGFLAENAEFAR.K	2105.04	0		2
			K.VKEDDMVEDKQLLMIMK.-	2177.16	0		3
			K.VKEDDMVEDKQLLMIMK.-	2177.16	0		4
			K.VMNMMGDK.I	980.449	0		2
			K.VVGDLAIFM(15.995)TK.N	991.541	0		2
			K.VYNKFESDLTNSCAEIYNFEIPGGQYTNLKPQADSLGLVNRFDEVK.E	5397.69	0		5
			R.ACSELGIK.S	932.5	0		2
			R.DTGIDLFGYDELGK.Y	1597.79	0		3
			R.EEDLELEYETACSESR.K	1986.84	0		2
			R.IVHREEDLELEYETACSESR.K	2493.15	0		2
			R.KCEENGITFIGPSSK.V	1749.9	0		2
			R.KVYNKFESDLTNSCAEIYNFEIPGGQYTNLKPQADSLGLVNR.F	4906.48	0		4
			R.KVYNKFESDLTNSCAEIYNFEIPGGQYTNLKPQADSLGLVNR.F	4906.48	0		5
			R.LDGGNGFTGANISPHYDSLLVK.T	2331.19	0		2
			R.LVEIGEVKENGFR.T	1544.86	0		2
			R.LVEIGEVKENGFR.T	1544.86	0		3
			R.NVISYALYPK.V	1222.7	0		3
			R.TIGFELNGMVR.E	1263.66	0		2
			R.TKADESYLIGEGK.G	1493.8	0		2
			R.TKADESYLIGEGK.G	1493.8	0		3
WP_003428740.1	acetyl-CoA carboxylase biotin carboxyl carrier protein	acetyl-CoA			0.86	0.13	234
			-.MNINEIKELLK.A	1427.84	0.87		2
			K.AIDSTNLEYVK.L	1307.7	0.94		2
			K.GEIIEVLVSNEELVEYNQPLFK.I	2618.39	0.84		2
			K.GEIIEVLVSNEELVEYNQPLFK.I	2618.39	0.86		3
			K.GEIIEVLVSNEELVEYNQPLFK.I	2618.39	0.6		4
			-.MNINEIK.E	916.505	0		2
			K.AIDSTNLEYVK.L	1307.7	0		3
			K.AQSTSSPVLSVQQESVVDLSLEK.P	2487.31	0		2
			L.MGTFYDSPSPDADSFVK.V	1919.87	0		2
WP_003421367.1	F0F1 ATP synthase subunit alpha	F0F1			1.12	13.35	23
			R.EAYPGDVFYLHSR.L	1580.76	1.12		3
			R.IVEVPVGEALIGR.V	1378.82	20		2
			R.SVYEPLQTGIK.S	1289.72	0		2
WP_003429729.1	50S ribosomal protein L35	50S			1.23	0.13	3
			K.STLVSDGDAKR.I	1203.65	1.32		3
			R.KSTLVSDGDAKR.I	1359.77	1.14		3
			K.STLVSDGDAKR.I	1203.65	0		2
WP_003425850.1	F0F1 ATP synthase subunit beta	F0F1			1.34	13.19	2
			K.IGLFGGAGVGK.T	1030.62	1.34		2
			K.TVLIQELINNIAK.Q	1523.93	20		2
			K.FDSEQSLPNLLNALVIK.L	1957.1	0		2
			K.LGDKEIVAEVAQHIGDDTVR.C	2221.18	0		3
			K.TALVFGQMNEPPGAR.M	1614.82	0		2
			K.VVDLLAPYLK.G	1185.74	0		2
			K.VVQIVGAVLDVK.F	1294.82	0		2
			R.FLSQSFTVAEQFTGNPGQYVPVK.E	2600.34	0		3
			R.GMEVVDTGGPISVPVGDETLGR.I	2213.11	0		2
			R.QISSLGIYPAVDPLESTSR.I	2061.08	0		2
			R.TREGNDLYGEMSESGVINK.T	2155.03	0		3
WP_003429730.1	50S ribosomal protein L20	50S			1.46	0.12	23
			K.LYRPANTFVMK.A	1394.77	1.38		2
			K.LYRPANTFVMK.A	1394.77	1.55		3
			K.M(15.995)LSEM(15.995)AIQDPEGFAK.L	177.082	0		2
			K.M(15.995)LSEMAIQDPEGFAK.L	177.082	0		2
			K.MLSEM(15.995)AIQDPEGFAK.L	637.282	0		2
			K.MLSEMAIQDPEGFAK.L	1721.84	0		2
WP_003421168.1	50S ribosomal protein L2	50S			1.58	6.51	234
			K.ATIGQVGNIEHGNVVIGK.A	1862.05	20		2
			K.ATIGQVGNIEHGNVVIGK.A	1862.05	1.53		3
			R.GSVMNPNDHPHGGGEGR.S	1744.77	1.63		4
			R.LVSINCK.A	888.51	1.38		2
			R.QMTVLVSDEITCNQPEK.S	2048	1.41		2
			R.SAGVSAQLMAK.E	1117.62	1.9		2
			R.TANIALLNYADGEKR.Y	1703.92	1.71		2
			R.TANIALLNYADGEKR.Y	1703.92	1.54		3
			K.DMPVGTIIHNIELKPGK.G	1946.11	0		3
			K.DMPVGTIIHNIELKPGK.G	1946.11	0		4
			R.GSVMNPNDHPHGGGEGR.S	1744.77	0		2
			R.TANIALLNYADGEK.R	1547.82	0		2
WP_003421156.1	30S ribosomal protein S17	30S			1.75	0.18	2
			K.TIVVAVEEFVR.H	1288.74	1.63		2
			R.LVEVVEK.V	870.543	1.88		2
			K.NICNIGDR.V	988.476	0		2
WP_009903252.1	DUF4091 domain-containing protein	DUF4091			3.41	0	2
			K.AFVNDAILR.D	1045.59	3.41		2
			K.AGDMFFVYPGK.D	1286.64	0		2
WP_003421163.1	30S ribosomal protein S3	30S			3.7	0.33	23
			K.EFGNLLLEDHNIR.K	1596.83	3.93		3
			R.TEGYSEGNVPLQTLR.A	1690.85	3.46		2
			K.MDLHVAKPGVVIGR.A	1546.9	0		3
			K.TIIVNIVEVR.S	1182.73	0		2
			R.ADIDYGFAEADTTYGK.I	1791.82	0		2
			R.AGAGIEALKAELEK.M	1482.87	0		2
			R.AGAGIEALKAELEK.M	1482.87	0		3
WP_003417352.1	class II fructose-1,6-bisphosphate aldolase	class			3.86	9.03	23
			K.YAGPHTLVEMVK.A	1399.75	0.57		2
			K.YAGPHTLVEMVK.A	1399.75	1.18		3
			R.DAIQAVVESK.I	1114.62	6.55		2
			R.FDILEEIQSK.L	1276.69	20		2
			K.IDDVLGSANSIN.-	1244.62	0		2
			K.LRFDILEEIQSK.L	1545.88	0		3
			R.TGVDSLAIAIGTSHGAFK.F	1799.98	0		3
WP_003421155.1	50S ribosomal protein L14	50S			4.56	0	2
			R.YGNIGDVIVATVK.S	1403.8	4.56		2
			K.IVSLAPEVL.-	967.595	0		2
WP_003421188.1	50S ribosomal protein L1	50S			4.76	0	2
			K.FYDASEALTLVSDIAGAK.F	1927	4.76		2
			K.EAEQAGADFVGAEELVQK.I	1946.97	0		2
			K.FYDASEALTLVSDIAGAK.F	1927	0		3
			K.LTENFTALMDAIIK.A	1634.9	0		2
WP_003421138.1	30S ribosomal protein S5	30S			6.65	0	2
			R.AVLELAGLK.D	968.627	6.65		2
			K.NLIVVPIVGTTIPHEVR.G	1885.12	0		3
WP_003421187.1	50S ribosomal protein L10	50S			7.77	0	3
			K.GLTVEEVTELRK.Q	1428.82	7.77		3
			K.APVSNFAYLIDAIAK.K	1647.92	0		2
			K.IVEMANIPSR.E	1156.63	0		2
WP_003427762.1	acyl-CoA dehydrogenase family protein	acyl-CoA			7.8	6.1	23
			K.ALQLHGGYGFIK.D	1358.77	20		2
			K.ALQLHGGYGFIK.D	1358.77	20		3
			K.ELDTLPAEMDK.T	1316.65	5.18		2
			K.FQNTQFTIADMETK.V	1728.84	6.99		2
			K.IAMGTLEVGR.I	1073.59	8.28		2
			K.MVISSNVLK.-	1045.62	8.17		2
			K.YYASEIANEVAYK.A	1575.78	7.43		2
			R.GTETSDLIFENVK.V	1507.78	5.99		2
			K.FISSNIPEEYGGGGAGYVSYAIVMEEIAR.R	3107.5	0		3
			K.FQNTQFTIADM(15.995)ETK.V	1342.62	0		2
			K.GIATGELIGAFGLTEPGAGSDAGGQQTTAELVGDHYILNGR.K	4043.01	0		3
			K.WDGFSTGAHEDK.M	1404.63	0		3
			R.GLVYDAAQK.R	1019.57	0		2
			R.IVSIYEGTSEVQK.M	1507.81	0		2
			R.IVSIYEGTSEVQK.M	1507.81	0		3
			R.VQFGKPIAK.F	1070.69	0		2
WP_003421121.1	30S ribosomal protein S4	30S			8.16	0	2
			K.AGENLLSLLER.R	1241.7	8.16		2
			K.VGDVIEVK.E	913.548	0		2
			R.IYGVLETQFR.N	1252.68	0		2
WP_003417347.1	electron transfer flavoprotein subunit alpha/FixB family pr	electron			8.84	6.2	2
			K.LDSVDDLLEAIKA.-	1456.8	7.09		2
			K.LGGVVGSSR.A	858.492	9.69		2
			K.NVWIFAEQR.E	1189.62	20		2
			K.VYVADDALLEK.Y	1290.71	7.66		2
			R.TGEVIALDYK.I	1163.64	7.98		2
			R.TTVLETVK.T	945.575	20		2
			-.MNDIKDLSSYK.N	1396.73	0		2
			K.ELITFGADK.V	1048.58	0		2
			K.IAPVVIELLGEGR.K	1392.83	0		2
			K.LDSVDDLLEAIKA.-	1456.8	0		3
			K.VIKDAIDEIKPEIMLFGATHIGR.D	2650.5	0		4
			R.VGTGLTADCTKLEIDPEDKK.I	2302.22	0		3
WP_003427760.1	electron transfer flavoprotein subunit beta/FixA family pro	electron			10.03	7.92	23
			K.LDIPQVTYVQDFK.I	1620.88	20		2
			K.VGDYDIIFAGR.Q	1252.65	8.04		2
			K.VSTPVLLTAVK.E	1182.76	1.83		2
			K.VWTIDDLDVNKEEVGLK.A	2057.11	10.03		3
			R.AFGGADTWATSNTIAAGISK.V	1995.01	20		2
			K.VWTIDDLDVNKEEVGLK.A	2057.11	0		2
			R.DGVPSILNPDDANALEEALK.I	2137.1	0		2
			R.DGVPSILNPDDANALEEALK.I	2137.1	0		3
			R.ECLAMGADDAILLSDR.A	1776.84	0		2
			R.QAIDGDTAQVGPQIAEK.L	1795.93	0		2
			R.QAIDGDTAQVGPQIAEK.L	1795.93	0		3
			R.QLEDGYELIK.V	1262.68	0		2
WP_009897960.1	S-layer protein SlpA	S-layer			10.89	5.25	234
			K.AFVVGGTGLADAMSIAPVASQLR.N	2259.21	20		3
			K.AGETTYSTGLTFEDGSTEK.I	2049.95	9.65		2
			K.ASIADENSPVK.L	1185.62	8.96		2
			K.DGSTKEDQLVDALAAAPVAANFGVTLNSDGKPVDKDGK.V	3955.07	20		4
			K.DLTGASADAIIAGTSSADGVVTNTGAASGSTETNSAGTK.L	3582.72	20		3
			K.EETIDIDASSSK.T	1349.66	20		2
			K.ESSYYQDNLNNDK.K	1644.73	20		2
			K.ESSYYQDNLNNDKK.V	1800.85	10.08		3
			K.EVENELKDMGLK.V	1487.79	20		2
			K.EVENELKDMGLK.V	1487.79	20		3
			K.GIATSVINK.L	957.586	10.41		2
			K.GILDGSITEIK.V	1200.7	7.54		2
			K.IADEVGLDNDK.A	1243.63	8.61		2
			K.IADEVGLDNDKAFVVGGTGLADAMSIAPVASQLR.N	3457.8	20		3
			K.KAPLLLTSK.D	1053.72	10.45		2
			K.KVYLAGGVNSISK.E	1418.85	20		3
			K.LAMSAIFDTAYTDSSETAVK.I	2177.06	20		2
			K.LAMSAIFDTAYTDSSETAVK.I	2177.06	9.9		3
			K.LGDSDIIDITK.A	1244.69	10.03		2
			K.LTVVPGSK.A	855.543	10.45		2
			K.MDLADGDATPIVVVDGK.A	1770.91	11.34		2
			K.MDLADGDATPIVVVDGK.A	1770.91	20		3
			K.TPSASVQPVITK.L	1282.75	11.8		2
			K.VFFEGTLASTIK.V	1367.77	9.39		2
			K.VGSELNAADASK.L	1216.63	9.75		2
			K.VVNFFVAK.D	978.59	9.35		2
			K.YQVVLYPEGK.R	1250.69	9.61		2
			K.YYNSDDENAIFR.D	1533.67	20		2
			R.DSVDNVVLVGGNAIVDGLVASPLASEK.K	2694.45	7.85		3
			R.IINAKEETIDIDASSSK.T	1918.03	20		3
			K.AFVVGGTGLADAM(15.995)SIAPVASQLR.N	1235.62	0		3
			K.AFVVGGTGLADAMSIAPVASQLR.N	2259.21	0		2
			K.AGETTYSTGLTFEDGSTEK.I	2049.95	0		3
			K.APLLLTSK.D	897.59	0		2
			K.DLKDYVDDLR.T	1306.68	0		2
			K.DLTGASADAIIAGTSSADGVVTNTGAASGSTETNSAGTK.L	3582.72	0		4
			K.DVENAIDDATGK.S	1302.63	0		2
			K.DYVDDLR.T	922.44	0		2
			K.ESSYYQDNLNNDKK.V	1800.85	0		2
			K.IADEVGLDNDKAFVVGGTGLADAMSIAPVASQLR.N	3457.8	0		4
			K.KVYLAGGVNSISK.E	1418.85	0		2
			K.LDNLGDGDYVDFLITSPGQGDK.I	2395.16	0		2
			K.LLFTQVDNK.L	1132.65	0		2
			K.LVSPAPIVLATDSLSSDQSVSISK.V	2470.36	0		3
			K.M(15.995)DLADGDATPIVVVDGK.A	177.082	0		2
			K.TAQDLAK.K	801.46	0		2
			K.TINDDVKDFLDDSQVDIIGGENSVSK.D	2907.44	0		3
			K.VETGDQGYTVVQSK.Y	1565.79	0		2
			K.VLDKDNGENLVQVGK.G	1710.95	0		2
			K.VLDKDNGENLVQVGK.G	1710.95	0		3
			K.VLNGDEADTNGLIEEVSGK.Y	2016.01	0		2
			K.VYLAGGVNSISK.E	1262.72	0		2
			R.DSVDNVVLVGGNAIVDGLVASPLASEK.K	2694.45	0		2
			R.IETAIALSQK.Y	1128.68	0		2
			R.IINAKEETIDIDASSSK.T	1918.03	0		2
			R.TYNNGYSNAIEVAGEDR.I	1899.86	0		2
WP_003421962.1	type I glyceraldehyde-3-phosphate dehydrogenase	type			13.63	7.58	24
			K.AIGLVIPSLK.G	1065.72	7.27		2
			K.GLMTTIHAYTNDQNTLDGPHPK.G	2480.22	20		4
			K.NVTVEEINAAMK.E	1373.72	6.48		2
			R.AAAGNIVPNTTGAAK.A	1410.78	20		2
			K.GLM(15.995)TTIHAYTNDQNTLDGPHPK.G	347.188	0		4
			K.GLMTTIHAYTNDQNTLDGPHPK.G	2480.22	0		3
			K.VVISAPATGDLK.T	1225.73	0		2
			K.VVSWYDNEMSYTSQLIR.T	2119.01	0		2
			K.VVSWYDNEMSYTSQLIR.T	2119.01	0		3
			R.VPVVTGSITELVCTLGK.N	1829.04	0		3
WP_003416451.1	RidA family protein	RidA			15.32	6.63	23
			K.AILAESGADFSNVVK.T	1575.85	10.63		2
			K.AILAESGADFSNVVK.T	1575.85	20		3
WP_003416871.1	glycine/sarcosine/betaine reductase component B subunit	glycine/sarcosine/betaine			20	0	23
			K.TVIVTDEYAGR.D	1250.65	20		2
			K.VIGHLEVVDVIAGGSDGSLR.A	2021.1	20		3
			R.ADAVVTGGNANQVVVLPK.L	1807.02	20		2
			R.ADAVVTGGNANQVVVLPK.L	1807.02	20		3
			R.ADGTIEVEIQAITGATNETGFGHLTAK.G	2800.43	20		3
			R.DGGSQSLADADVR.A	1317.62	20		2
			K.DINFVGVIITNENVYLADKER.S	2478.32	0		2
			K.DINFVGVIITNENVYLADKER.S	2478.32	0		3
			K.VIGHLEVVDVIAGGSDGSLR.A	2021.1	0		2
			R.ADGTIEVEIQAITGATNETGFGHLTAK.G	2800.43	0		4
WP_003417090.1	trigger factor	trigger			20	0	2
			K.VENTVSDENVDAK.L	1474.72	20		2
			K.AEGIEATEEEFKAELEK.M	2007.01	0		3
			K.MASAYNMEVEK.I	1327.62	0		2
			K.TIDLLVDNATIA.-	1285.71	0		2
			R.IVIETQYGK.G	1105.64	0		2
WP_003418375.1	CooT family nickel-binding protein	CooT			20	0	2
			K.IYLTDLLGEQK.I	1347.77	20		2
			K.VMENVVNIDPCDGK.I	1644.79	0		2
WP_003418655.1	adenosylmethionine decarboxylase	adenosylmethionine			20	0	2
			K.SFELLEQLLK.S	1274.75	20		2
			R.SESTEIPR.G	945.477	20		2
WP_003418897.1	3-hydroxybutyryl-CoA dehydrogenase	3-hydroxybutyryl-CoA			20	0	3
			K.SINKVPVDVSESPGFVVNR.I	2099.15	20		3
			K.VTFDTVFELSK.S	1340.72	0		2
WP_003419082.1	50S ribosomal protein L21	50S			20	0	2
			K.LGSPVVEGASVQAK.V	1396.79	20		2
			K.VSEGDVLFVEK.L	1276.69	20		2
WP_003419930.1	NADH peroxidase	NADH			20	1.72	234
			K.AFLGLLNR.Y	930.565	15.98		2
			K.ELGLDAIHDTVHEMCK.D	1923.93	20		4
			K.ELGLDAIHDTVHEMCKDEAR.H	2395.13	20		4
			K.FAELLGEVVVADTK.E	1545.87	20		3
			K.FAELLGEVVVADTKENLR.V	2059.14	20		3
			K.VGADKFEEMK.G	1236.64	20		2
			R.IALEEAEHAAK.F	1236.67	20		2
			R.IGVAQGVDEEIIEGLR.A	1724.93	20		3
			R.VDAEYGATDGK.L	1180.56	20		2
			R.VRVDAEYGATDGK.L	1435.73	20		2
			R.VRVDAEYGATDGK.L	1435.73	15.54		3
			K.ELGLDAIHDTVHEM(15.995)CKDEAR.H	1606.77	0		3
			K.ELGLDAIHDTVHEMCKDEAR.H	2395.13	0		3
			K.ELGLDAIHDTVHEMCKDEAR.H	2395.13	0		5
			R.ANFVGECTEVGMYLAMSR.Q	2062.94	0		2
			R.EGYPEVGEAYKR.I	1452.72	0		3
			R.IALEEAEHAAK.F	1236.67	0		3
			R.IGVAQGVDEEIIEGLR.A	1724.93	0		2
			R.QADREGYPEVGEAYKR.I	1923.95	0		3
			R.QADREGYPEVGEAYKR.I	1923.95	0		4
WP_003420374.1	thioredoxin	thioredoxin			20	0	23
			K.DGKPVETLIGFMPK.N	1614.91	20		2
			K.DGKPVETLIGFMPK.N	1614.91	20		3
WP_003420702.1	butyrate kinase	butyrate			20	0	2
			K.AILLTGGIAYSK.M	1261.76	20		2
			K.VGVLGEHASNLGGIIAK.Q	1689.98	0		3
WP_003420710.1	MFS transporter	MFS			20	0	3
			K.YFNCDTQEAAHGR.A	1595.68	20		3
			R.NAETQGYPIR.V	1175.59	0		2
WP_003420866.1	NAD-specific glutamate dehydrogenase	NAD-specific			20	4.41	23
			K.EHGNLLNFPGAK.R	1351.72	20		2
			K.EHGNLLNFPGAK.R	1351.72	20		3
			K.LTGQSSIGVITGKPVEFGGSLGR.T	2316.29	20		3
			R.GYIDGIYK.L	983.533	10.14		2
			R.TAATGFGVAVTAR.E	1248.68	20		2
			K.DVNVFEMAQSQVK.N	1549.78	0		3
			K.GGIIVDPSTLSQGELER.L	1797.95	0		2
			K.IAVQGIGNVGSYTVLNCEK.L	2078.09	0		2
			K.LGMEPAVYELLKEPMR.V	1932.03	0		3
			K.LVCEAANGPTTPEADEVFAER.G	2304.08	0		2
			R.VIEVSIPVK.M	1038.67	0		2
WP_003420907.1	co-chaperone GroES	co-chaperone			20	0	2
			K.TASGIVLPGAAK.E	1139.69	20		2
			K.EQPQIAEVVEVGPGGIVEGK.E	2091.13	0		2
			K.EQPQIAEVVEVGPGGIVEGK.E	2091.13	0		3
WP_003421122.1	30S ribosomal protein S11	30S			20	0	2
			K.STPFASQMAAETAAK.A	1565.78	20		2
			R.ALQATGLEVTMIK.D	1429.82	0		2
WP_003421158.1	MULTISPECIES: 50S ribosomal protein L29	MULTISPECIES:			20	0	2
			R.DLTSEELMNK.L	1234.61	20		2
			R.FQLATGQLENTAR.I	1475.77	0		2
WP_003421173.1	50S ribosomal protein L3	50S			20	2.96	23
			K.GVVIPVTAVEAGPMVVTQIK.T	2064.21	20		3
			K.VGMTQIFTDK.G	1194.63	20		2
			K.VTVQNLEVVK.V	1183.72	13.39		2
			R.RPGSMGACSYPGR.V	1422.65	20		3
			R.VDSVEGYTVGQEIK.A	1578.81	20		2
			K.ADVFEAGAK.I	962.507	0		2
			K.GFQGPIKR.H	957.576	0		2
			K.KGHLAAANVLK.K	1204.77	0		3
WP_003421180.1	30S ribosomal protein S7	30S			20	0	2
			K.TGEEALEVFNK.A	1291.67	20		2
			R.IVYDAFAIVAEK.T	1393.79	20		2
			K.AMDNIMPVLEVK.A	1414.76	0		2
			K.EIMDAANNTGASVK.K	1475.73	0		2
			R.EVLPDPMYGSK.V	1290.65	0		2
			R.VGGANYQVPIEVRPER.R	1810.97	0		3
WP_003421189.1	50S ribosomal protein L11	50S			20	0	3
			K.TADQAGMIIPVVITVYQDR.S	2118.12	20		3
			K.MPDLNAASVEAAMSMIAGTAR.S	2135.03	0		2
			K.MPDLNAASVEAAMSMIAGTAR.S	2135.03	0		3
			K.TADQAGMIIPVVITVYQDR.S	2118.12	0		2
			K.TPPAAVLIK.K	964.632	0		2
WP_003421190.1	transcription termination/antitermination factor NusG	transcription			20	0	2
			R.QVVVPTEEVVETTK.T	1612.89	20		2
			K.GVTGFVGPGSKPVPLSEDEVK.A	2183.19	0		3
WP_003422090.1	proline racemase	proline			20	0	2
			K.FVYESILGTLFK.G	1471.83	20		2
			K.TVDLVEIYDEPTHPEATYK.N	2276.13	0		3
			R.GDVTVVDGK.A	944.518	0		2
			R.SIQAIDSHTAGEATR.I	1583.79	0		2
WP_003422104.1	D-proline reductase (dithiol) proprotein PrdA	D-proline			20	0	23
			K.IVLEENEQSLPMSK.K	1671.88	20		2
			K.IVLEENEQSLPMSK.K	1671.88	20		3
			K.LKETLDALSPMTTDNVEGYK.A	2309.19	20		3
			K.NAIEGVEVK.A	1013.58	20		2
			K.QGIENEILSNNTLAPEDAVR.I	2211.12	20		2
			K.QGIENEILSNNTLAPEDAVR.I	2211.12	20		3
			K.SKQGIENEILSNNTLAPEDAVR.I	2454.28	20		3
			K.YMTHMVDNNK.S	1307.6	20		2
			K.YMTHMVDNNK.S	1307.6	20		3
			R.AMEDEEIDLVGVVFVGSPQVNAEK.F	2631.32	20		3
			R.GIPVVGVSFSAVQGALVVGNK.Y	2054.2	20		2
			K.AGEAKEEVVEETVEEAAPVSEAAVVPVSTGVAGETVK.I	3752.94	0		3
			K.IVLEENEQSLPM(15.995)SK.K	1428.72	0		2
			K.LKETLDALSPMTTDNVEGYK.A	2309.19	0		2
			K.SKQGIENEILSNNTLAPEDAVR.I	2454.28	0		2
			R.AFDYVTQEIR.E	1268.64	0		2
			R.AMEDEEIDLVGVVFVGSPQVNAEK.F	2631.32	0		2
			R.GIPVVGVSFSAVQGALVVGNK.Y	2054.2	0		3
			R.NAEEICKEANETQELVVDMK.L	2434.18	0		3
WP_003422749.1	D-alanine--poly(phosphoribitol) ligase subunit DltC	D-alanine--poly(phosphoribitol)			20	0	2
			K.DMSTVNNLVK.F	1175.62	20		2
			R.LGIELQPTDLER.K	1410.77	20		2
WP_003422953.1	serine hydroxymethyltransferase	serine			20	0	2
			R.TLVVGLTEK.Y	1014.63	20		2
			K.AIFPGIQGGPLEHIIASK.A	1904.1	0		3
			K.LISGGTDNHLILLDLTNK.N	1993.13	0		3
WP_003423106.1	IMP dehydrogenase	IMP			20	0	2
			R.GQATSIIEVAQAR.D	1370.75	20		2
			R.EGFLYLAEAGADFVK.V	1684.87	0		2
WP_003424083.1	hypothetical protein	hypothetical			20	0	2
			K.ITLPETAIDTLK.S	1369.81	20		2
			K.SILKDNQDKPNNIR.V	1737.97	0		4
			R.VYFAGVGCGGPSFGLALDEK.K	2100.04	0		2
WP_003424535.1	elongation factor Ts	elongation			20	0	25
			K.EVCLLEQTFVK.N	1420.76	20		2
			K.YVSRDEVDAEYIAHETEVLTQQALNEGKPANIVEK.M	4044.06	20		5
			K.ALQEAEGNMEK.A	1274.62	0		2
			K.DVAMQVAAMNPK.Y	1329.68	0		2
			K.VVTNGQVAGYIHGGGK.I	1611.87	0		3
			R.EENFAEEVAK.Q	1220.59	0		2
			R.FEVGEGIQK.R	1061.58	0		2
WP_003424537.1	30S ribosomal protein S2	30S			20	0	23
			K.KQAQDAIKDEAER.C	1584.85	20		2
			K.MEEEGVFNVLPK.K	1446.74	20		2
			K.QAQDAIKDEAER.C	1428.72	20		3
			K.QLLEAGVHFGHQTR.R	1619.85	20		3
			K.EVAETGKPILFVGTK.K	1671.98	0		2
			K.KQAQDAIKDEAER.C	1584.85	0		3
			K.LITGAMATAVIEGR.Q	1429.8	0		2
			R.KENIAIQEAHR.L	1363.76	0		3
			R.LGIPVVGIVDTNCDPEQLDFAIPGNDDAIR.A	3251.62	0		3
			R.NGIYIIDLQK.T	1231.72	0		2
			R.QGAEEEVAEDQE.-	1360.56	0		2
WP_003426939.1	PFL family protein	PFL			20	0	23
			R.APVMPINTNSSELFTQR.G	1932.98	20		2
			R.APVMPINTNSSELFTQR.G	1932.98	20		3
			R.IIPAPGCDVGDMVEFGGLLGR.A	2201.11	20		2
			R.IIPAPGCDVGDMVEFGGLLGR.A	2201.11	20		3
			R.APVM(15.995)PINTNSSELFTQR.G	444.241	0		3
			R.IIPAPGCDVGDM(15.995)VEFGGLLGR.A	1271.59	0		3
WP_003427723.1	50S ribosomal protein L24	50S			20	0	3
			K.HQKPSAMNQQGGIINK.E	1833.99	20		3
			K.EAPIHISNVMPFDPETGK.G	2038.03	0		2
WP_003427763.1	(R)-2-hydroxyisocaproyl-CoA dehydratase subunit beta	(R)-2-hydroxyisocaproyl-CoA			20	4.39	2
			K.DIDGVIFCMMK.F	1383.66	20		2
			K.FCDPEEYDYPLVR.K	1729.77	20		2
			R.ELEEICGYEIEEAK.I	1766.83	20		2
			R.GSLIVDEVK.K	1014.6	20		2
			R.IQTFAEMMSLA.-	1268.61	10.18		2
			K.EVVENPNAAVK.K	1224.67	0		2
			K.HSNTIKPSIR.S	1207.7	0		2
			K.IHESIEVYNEHRK.T	1708.89	0		3
			K.LNAMPEEVCSGK.K	1389.66	0		2
			K.MKEVVENPNAAVK.K	1511.84	0		2
			K.MKEVVENPNAAVK.K	1511.84	0		3
			K.VLLTGILADSK.D	1184.74	0		2
			R.TDVPAGDDALER.L	1285.62	0		2
WP_003427766.1	isocaprenoyl-CoA:2-hydroxyisocaproate CoA-transferase HadA	isocaprenoyl-CoA:2-hydroxyisocaproate			20	5.08	234
			K.DKYPGLIFSQILGYGEK.G	2012.11	20		2
			K.DKYPGLIFSQILGYGEK.G	2012.11	20		3
			K.GTSPANTAAGFGDHYAGLALAAGSLAALHK.K	2866.48	20		4
			K.IEPIEGDGIR.V	1125.6	9.42		2
			K.IQSCEDLLDDEQAWANDFLFK.K	2613.21	20		2
			K.MGIAYDQIK.D	1093.58	12.02		2
			K.SKEGVEILHK.L	1222.73	20		2
			K.SKEGVEILHK.L	1222.73	20		3
			K.TLDEWSALLEEADLPFEK.I	2162.09	8.93		3
			R.ENPNSPLMTTYK.C	1449.72	20		2
			R.GGVSQSVMEK.G	1076.55	9.8		2
			K.DKPGFDYTAYFAR.G	1605.78	0		3
			K.IQSCEDLLDDEQAWANDFLFK.K	2613.21	0		3
			K.LLSEADIFVTNVR.V	1503.83	0		2
			K.MLGDWGAEVIK.I	1273.67	0		2
			K.SPASDDENPMFELENGNK.K	2049.9	0		2
			K.SPASDDENPMFELENGNKK.G	2206.03	0		2
			K.SPASDDENPMFELENGNKK.G	2206.03	0		3
			K.TLDEWSALLEEADLPFEK.I	2162.09	0		2
			K.VGQHTVEVLK.S	1164.69	0		2
			K.VVELSSFIAAPCCAK.M	1706.87	0		2
			R.WIQLALIQYNK.W	1444.84	0		2
WP_003428474.1	FprA family A-type flavoprotein	FprA			20	8.41	23
			K.ANFKDEFLSNLSEVTDIAK.I	2225.17	5.43		3
			K.HYYDCIVKPFAK.H	1623.85	20		3
			K.KDIYFTGVVDEGLK.V	1666.92	20		2
			K.DGEILNIGK.R	1013.58	0		2
			K.HVLSAVDK.V	923.544	0		2
WP_003428573.1	electron transfer flavoprotein subunit alpha/FixB family pr	electron			20	0	2
			K.VSALLLGSK.V	942.611	20		2
			K.AADPIVVLFGATSIGR.D	1613.91	0		2
WP_003429271.1	PLP-dependent aminotransferase family protein	PLP-dependent			20	0	23
			K.FIDVPTDSDGMIMEELEK.I	2125	20		2
			K.MIYVIPDFQNPTGR.T	1677.85	20		2
			K.VFIDEGDVILCESPSYIGAINAFK.S	2713.38	20		3
			R.SAMQYTTTEGYEPLR.E	1773.82	20		2
			K.FIDVPTDSDGMIMEELEK.I	2125	0		3
			K.LTQQPQIISFAGGMPAPELFPVEEMKK.V	3070.63	0		3
			K.NVAYVAGGGFFPNGGR.E	1609.8	0		2
			K.QGADLQASTISQMEVSK.F	1847.93	0		2
			K.TNVNKDDILVTSGSQQGLDFAGK.V	2491.3	0		3
			K.VFIDEGDVILCESPSYIGAINAFK.S	2713.38	0		2
			R.LGWTCASPEILSK.F	1516.8	0		2
WP_003430159.1	NifB/NifX family molybdenum-iron cluster-binding protein	NifB/NifX			20	0	3
			K.ALSGTAVDAVVVGGIGQGAIIK.L	2052.2	20		3
			K.SLDNGDLDHEHGK.C	1491.7	20		3
			K.ALSGTAVDAVVVGGIGQGAIIK.L	2052.2	0		2
			K.GLDSKPYGHFGSAPIFVVCDLESGEVK.S	2992.51	0		4
			R.AEGDTISANLDLLK.N	1514.82	0		3
WP_003430444.1	asparagine--tRNA ligase	asparagine--tRNA			20	0	2
			K.IVNSEFIR.I	1004.57	20		2
			K.SIVVEGESDSSYPLQK.K	1792.91	20		2
WP_003430934.1	molecular chaperone DnaK	molecular			20	0	23
			K.IKEAEMNAEADK.Q	1431.73	20		2
			K.IKEAEMNAEADK.Q	1431.73	20		3
			K.SYTPQEISAIILQK.L	1645.93	20		2
			K.SYTPQEISAIILQK.L	1645.93	20		3
			K.EKIEAFNQAESTIYQTEK.T	2213.13	0		3
			K.ITITSNTNLSEAEIEQK.I	1947.02	0		2
			R.LGGDDFDQIVIDYLAEEFKK.A	2399.23	0		3
WP_003431407.1	D-2-hydroxyacid dehydrogenase	D-2-hydroxyacid			20	0	23
			R.GGLINTGDLIEALESGK.I	1741.95	20		3
			R.SITVGVIGTGK.I	1086.66	20		2
			R.WIAELLGTEVR.S	1313.73	20		2
			K.GLGANVIAFDQYPNSDLNDILTYK.D	2697.37	0		2
			K.MNPGELTDPEINK.L	1512.75	0		2
			R.AAALDTFETEGLFLNK.K	1795.94	0		2
			R.AAALDTFETEGLFLNK.K	1795.94	0		3
			R.GGLINTGDLIEALESGK.I	1741.95	0		2
WP_003432446.1	glutamine--fructose-6-phosphate transaminase (isomerizing)	glutamine--fructose-6-phosphate			20	0	2
			K.IQEILDNEEYIK.E	1561.82	20		2
			R.GYDSAGVAVNSSNEK.E	1552.74	20		2
			R.ILSITNVVGSSIAR.E	1456.86	20		2
			K.AAEVIVEGLSK.L	1170.69	0		2
			K.DSPLVVGVGEGENFIASDIPALLK.Y	2496.36	0		2
			K.FESQTDTEVIAHLVDK.Y	1887.97	0		3
			K.GTPVIAIATQEK.L	1282.75	0		2
			R.GAYALGVICK.E	1106.62	0		2
			R.GYDSAGVAVNSSNEK.E	1552.74	0		3
WP_003434148.1	triose-phosphate isomerase	triose-phosphate			20	0	23
			K.GLYGELANEVR.I	1247.65	20		2
			K.TATAEDANDVISYIR.E	1665.82	20		2
			R.RQYFNETDETVNKK.V	1855.95	20		3
			K.ALEVGIDPILCVGETLEQR.E	2140.13	0		3
			K.EALEFVNEVK.D	1232.67	0		2
			K.EIDMDYVVIGHSER.R	1689.8	0		3
			K.GAFTGEVSPLMLK.E	1404.77	0		2
			K.VVVAYEPIWAIGTGK.T	1657.94	0		2
			K.VVVAYEPIWAIGTGK.T	1657.94	0		3
WP_003434191.1	peptidylprolyl isomerase	peptidylprolyl			20	0	2
			K.IELYPNIAPNTVK.N	1526.87	20		2
			R.TMAPNSAGSQFFIMHK.N	1822.89	0		3
WP_003434417.1	ribosome-associated translation inhibitor RaiA	ribosome-associated			20	0	2
			K.QIELTDAIK.N	1085.63	20		2
			-.MNIIISGK.Q	930.557	0		2
WP_003435635.1	glucose-6-phosphate isomerase	glucose-6-phosphate			20	0	23
			R.AAIDMVSHSFR.N	1260.63	20		2
			R.AAIDMVSHSFR.N	1260.63	20		3
			K.DISVNVISK.S	1029.61	0		2
			R.NITISSEEVDLDGLNYLAGK.T	2207.14	0		2
WP_003435673.1	50S ribosomal protein L5	50S			20	0	2
			R.GMDIIFVTTAK.T	1250.69	20		2
			K.EVAPALMEK.F	1042.57	0		2
			K.GVEELEMISGQKPVITK.A	1942.09	0		3
			R.GNYALGVK.E	876.507	0		2
WP_003436178.1	elongation factor G	elongation			20	6.85	23
			K.EDSFIGIIDLLK.M	1417.81	7.98		2
			K.MAGSMAFK.D	897.445	20		2
			K.VEVVTPEDYMGDVMGDLNSR.R	2254.03	20		2
			R.LNSNAVPMQLPIGK.E	1536.87	20		2
			R.NIGIMAHIDAGK.T	1294.71	20		3
			R.QAETYGVPR.I	1047.53	2.44		2
			R.SGAQVINAFVPLSEMFGYSTDLR.S	2530.26	20		2
			R.SGAQVINAFVPLSEMFGYSTDLR.S	2530.26	20		3
			R.VAPQEPGEGYK.F	1229.63	8.14		2
			R.VLDGSVAVFCAK.G	1320.71	20		2
			K.GGVEPQSENVWR.Q	1384.67	0		2
			K.GILADGEEAER.H	1186.58	0		2
			K.GNAVLLEPYFK.V	1305.73	0		2
			K.IMTDPFVGK.L	1062.58	0		2
			K.TVGGSVPK.E	799.48	0		2
			K.VEVVTPEDYMGDVMGDLNSR.R	2254.03	0		3
			K.VGAPQVAYR.E	987.55	0		2
			K.VYAGDIAAAVGLK.D	1302.75	0		2
			R.ATYTMIFDHYEQVPASVAK.K	2227.11	0		2
			R.ATYTMIFDHYEQVPASVAK.K	2227.11	0		3
			R.EKLVESVAETDEELMMK.Y	2065.04	0		2
			R.ETITQPVDVEYK.Y	1476.77	0		2
			R.HSSDEEPFSALAFK.I	1619.78	0		2
			R.VYSGTLESGSYVLNATK.N	1844.96	0		2
			R.VYSGTLESGSYVLNATK.N	1844.96	0		3
WP_003436400.1	FAD-dependent oxidoreductase	FAD-dependent			20	0	23
			K.DGSLVGAILINDLSCTVK.L	1931.05	20		2
			K.GDFEDIMK.A	1009.48	20		2
			K.TIIVNDGAIKFDK.L	1516.89	20		3
			K.TLVTCDSFGSHYSNDK.I	1885.85	20		3
			K.TVLFETVK.D	991.595	20		2
			K.TVLFETVKDK.H	1262.75	20		3
			K.DGSLVGAILINDLSCTVK.L	1931.05	0		3
			K.GLEVVVVEAMDSILSK.Q	1743.97	0		2
			K.TIIVNDGAIK.F	1098.66	0		2
			K.VASVFGSYGWSGEGIENAMER.I	2274.05	0		2
			K.VVASETAIK.Y	972.586	0		2
			R.ANTQMVQDTSVK.I	1376.7	0		2
WP_003437537.1	YebC/PmpR family DNA-binding transcriptional regulator	YebC/PmpR			20	0	2
			K.EGGADPEYNAALK.T	1389.68	20		2
			K.GYEFISADVK.M	1183.61	0		2
			K.MIPQTTTVLTEESHLK.M	1884.01	0		3
WP_003438030.1	nitroreductase family protein	nitroreductase			20	0	23
			K.LGINSDKEVTGIIAIGYGENVSNAK.V	2646.43	20		3
			K.SDMQVVTDK.G	1077.54	20		2
			R.SEVFNNLDK.V	1120.58	20		2
			K.IVGYCNI.-	865.437	0		2
			K.KLVPEIDVDVR.I	1337.79	0		3
			R.ALLDAFHYAR.L	1203.64	0		3
WP_003438096.1	acetate kinase	acetate			20	0	234
			K.DAIALVLEAVAHPEFGAVK.E	2006.13	20		3
			R.GKETVISTADSK.V	1318.73	20		2
			R.YGFHGTSHNYVSQR.A	1679.78	20		4
			K.DAIALVLEAVAHPEFGAVK.E	2006.13	0		2
			K.IVTCHLGNGASIAAVDGGK.C	1896	0		3
WP_003438268.1	GTP-sensing pleiotropic transcriptional regulator CodY	GTP-sensing			20	0	3
			K.ILEIFPEEHGR.L	1366.72	20		3
			K.VLGLHLNDVQDSSVIEDEYTK.Q	2430.24	0		3
WP_003438306.1	translation initiation factor IF-2	translation			20	0	3
			R.AVGTVIEAELDKGR.G	1512.85	20		3
			K.ADVQGSVQAVK.Q	1156.65	0		2
			R.KTDVISGEAGGITQHIGASEVK.I	2281.24	0		3
			R.TYTIIYK.A	956.558	0		2
WP_003439110.1	ornithine cyclodeaminase family protein	ornithine			20	0	2
			K.TVGIGVQDVVTAK.R	1341.79	20		2
			R.TGAASGAAIDVLAK.K	1299.74	20		2
WP_003439524.1	argininosuccinate synthase	argininosuccinate			20	0	23
			K.AYVDDISEEFVTETIFK.A	2062.02	20		2
			K.SREDAIDYAEK.H	1351.66	20		3
			R.FEATIAALDPTIK.V	1444.82	0		2
WP_004454042.1	serine dehydratase subunit alpha family protein	serine			20	0	3
			K.ALAISHLVTGYIK.N	1440.87	20		3
			K.AESLMDTVTIQELIK.N	1745.95	0		2
			K.ALAISHLVTGYIK.N	1440.87	0		2
			K.DIEFLLDGVK.M	1203.68	0		2
			K.ELLGEEIVENR.M	1327.7	0		2
			K.IAEDYMDNTPLSITPADTR.E	2151.02	0		2
			K.MNEEMAEYGLK.Q	1369.63	0		2
			R.MLVSPSIYK.N	1092.63	0		2
WP_004454390.1	2-hydroxyacyl-CoA dehydratase	2-hydroxyacyl-CoA			20	0	23
			K.LQPSALTGLELHNVLYQAGFK.F	2355.3	20		3
			K.SLGVTITEEDIR.T	1359.72	20		2
			R.ELLKEFYALGK.L	1393.82	20		3
			R.ILITGSPIGGISEK.I	1439.86	20		2
			K.NKPFMSLETDYSK.S	1642.83	0		2
			K.NKPFMSLETDYSK.S	1642.83	0		3
WP_004454646.1	aldehyde dehydrogenase family protein	aldehyde			20	0	2
			K.VVYYNAEYLAK.L	1387.74	20		2
			K.LAVEETGMGVYEDK.V	1595.78	0		2
WP_004454985.1	ABC transporter substrate-binding protein	ABC			20	0	2
			K.GNLVNYLAEK.V	1175.65	20		2
			K.NYALVAQQELK.K	1331.74	20		2
			K.DAKPSPAILFEDWSK.L	1787.95	0		3
			K.DAPIYTIDYEQNLMAAQK.N	2140.06	0		2
			K.IIPNEASQEAALNNGEISLMK.T	2298.2	0		2
			K.ITLPTASESFLYGISK.I	1782.98	0		2
			K.ITLPTASESFLYGISK.I	1782.98	0		3
			K.NYALVAQQELKK.I	1487.87	0		2
WP_009887863.1	elongation factor Tu	elongation			20	5.5	23
			K.FTAEVYVLK.K	1124.65	9.08		2
			K.IVELFEQIDEYIPAPER.D	2089.08	20		2
			R.DLLTEYDFPGDDTPIVR.G	1993.97	20		2
			R.DTDKPFLMPVEDVFSITGR.G	2223.13	7.51		3
			R.EHILLSR.Q	894.529	9.39		2
			R.GITISTAHVEYETPNR.H	1814.92	20		2
			R.HYAHVDCPGHADYVK.N	1824.84	20		3
			R.QVGVPYIVVFLNK.C	1530.92	20		2
			R.QVGVPYIVVFLNK.C	1530.92	20		3
			R.YQLGEAVDFANIDKAPEER.E	2221.11	20		3
			K.IVELFEQIDEYIPAPER.D	2089.08	0		3
			K.LLDQAQAGDNIGALLR.G	1694.93	0		2
			K.TTLTAAITK.T	974.601	0		2
			K.VQDEVELVGLTEAPR.K	1681.89	0		2
			R.DLLTEYDFPGDDTPIVR.G	1993.97	0		3
			R.GITISTAHVEYETPNR.H	1814.92	0		3
			R.HYAHVDCPGHADYVK.N	1824.84	0		4
			R.KVVVTGVEMFR.K	1319.76	0		2
			R.KVVVTGVEMFR.K	1319.76	0		3
			R.TVASGVVATIIE.-	1186.68	0		2
			R.YQLGEAVDFANIDKAPEER.E	2221.11	0		2
WP_009887887.1	50S ribosomal protein L4	50S			20	0	2
			K.YDSFIITTDAVK.K	1427.75	20		2
			K.ALVVIADKNDNVIK.S	1594.97	0		2
			K.ALVVIADKNDNVIK.S	1594.97	0		3
			K.VQNSEVIVLDALNMDAPK.T	2012.07	0		2
			R.NIEGVQTALVNTMNVYDILK.Y	2291.23	0		2
WP_009888019.1	anaerobic carbon-monoxide dehydrogenase catalytic subunit	anaerobic			20	0	2
			R.GICGADADTIVAR.N	1345.67	20		2
			K.AFLGDSWKPLINLIAEGK.I	2056.18	0		3
			K.DLTGGHVIVNPDPK.S	1516.82	0		3
			K.LKDLTGGHVIVNPDPK.S	1787.04	0		3
			K.LVGCTCVGQDLQLR.G	1645.83	0		2
			K.MVCLDDVAK.K	1105.55	0		2
WP_009888223.1	2-hydroxyisocaproyl-CoA dehydratase activator HadI	2-hydroxyisocaproyl-CoA			20	0	23
			K.IEDIVAGIHTSVAK.R	1507.86	20		3
			K.QISELSCHAR.G	1227.6	20		3
			R.TIIDIGGQDAK.V	1185.66	20		2
WP_009888868.1	acetyl-CoA C-acetyltransferase	acetyl-CoA			20	0	2
			K.IMGYGPVPATK.K	1188.66	20		2
			R.MGDAAFVDSMIK.D	1339.65	20		2
			R.TAVGSFGGAFK.S	1096.59	20		2
WP_009889064.1	alanine--tRNA ligase	alanine--tRNA			20	0	3
			K.GGGRPNMAQAGASDVSK.V	1657.82	20		3
			R.TGDIENVGITAR.H	1272.67	0		2
WP_009889131.1	peptidylprolyl isomerase	peptidylprolyl			20	0	2
			K.EITNIDIENALK.S	1427.79	20		2
			K.HILVDSDEK.A	1110.59	20		2
			K.LEDLQESTESTFDEVK.A	1925.92	20		2
			K.SEEISFEDAALK.H	1393.7	20		2
			K.SLDPYQAMQFK.T	1382.69	20		2
			K.SSFSKPESATAK.H	1322.71	20		2
			R.GQMVPEFEEAVFSMAK.G	1855.89	0		3
WP_009889371.1	NADH peroxidase	NADH			20	1.98	234
			K.AFLGLLNR.H	930.565	15.98		2
			K.ELGLDAIHDTVHEMCK.D	1923.93	20		4
			K.ELGLDAIHDTVHEMCKDEAR.H	2395.13	20		4
			K.FAELLGEVVVADTK.E	1545.87	20		3
			K.FAELLGEVVVADTKENLR.V	2059.14	20		3
			K.GEMVWADEHR.I	1256.56	20		3
			K.VGADKFEEMK.G	1236.64	20		2
			K.VGADKFEEMKGEMVWADEHR.I	2448.16	20		3
			R.ANFTGECTEVGMYLAMSR.Q	2064.91	20		2
			R.IAFEEAEHAAK.F	1270.66	14.15		2
			R.IAFEEAEHAAK.F	1270.66	16.77		3
			R.IGVAQGVDAEIIEGLR.A	1666.93	20		2
			R.IGVAQGVDAEIIEGLR.A	1666.93	20		3
			R.QADREGYPEVAEAYKR.I	1937.97	20		4
			R.VDAEYGATDGK.L	1180.56	20		2
			R.VRVDAEYGATDGK.L	1435.73	20		2
			R.VRVDAEYGATDGK.L	1435.73	15.54		3
			K.ELGLDAIHDTVHEM(15.995)CKDEAR.H	1606.77	0		3
			K.ELGLDAIHDTVHEMCKDEAR.H	2395.13	0		3
			K.ELGLDAIHDTVHEMCKDEAR.H	2395.13	0		5
			K.VGADKFEEMKGEMVWADEHR.I	2448.16	0		4
			R.EGYPEVAEAYKR.I	1466.74	0		3
			R.QADREGYPEVAEAYK.R	1780.86	0		3
WP_009889571.1	nucleoside hydrolase	nucleoside			20	0	3
			K.LVTAQDTHGEDGIGENFYQK.V	2278.09	20		3
			K.AFENLDEFVSMGGAFR.I	1817.85	0		2
WP_009890721.1	threonine ammonia-lyase	threonine			20	0	2
			-.MMNVTLTDVK.E	1206.64	20		2
			K.IVGVQTANIPSMK.E	1412.81	20		2
			K.ETGATFLHPFNDK.Y	1531.77	0		3
			K.IVSEGAGAVCTAAILSGK.Y	1758.95	0		2
			K.LSAGEALGK.Q	900.528	0		2
			K.QSAEFILETIDYDHIAR.I	2049.02	0		3
			R.IISENGGNILSANQGK.L	1669.9	0		2
WP_009895180.1	proline--tRNA ligase	proline--tRNA			20	0	2
			R.DFEGIVGDFR.N	1181.57	20		2
			R.TAAAIIEQHNDEK.G	1494.77	20		2
			K.GIIWPLSVAPYHVVIVPANMK.N	2360.35	0		3
			K.TLVYEADGK.T	1050.56	0		2
			K.YSESMNANFIDKDGK.S	1801.86	0		3
WP_009895182.1	proline--tRNA ligase	proline--tRNA			20	4.54	234
			K.ALCEELLAMPVVAGQK.S	1783.96	20		3
			K.ALQSGTSHFLGQHFTK.A	1814.95	20		4
			K.DIENNQAMVFR.R	1363.66	20		2
			K.GFMVVKPYGYALWEK.M	1872.01	20		3
			K.GVAVEVDDRDNYTTGWK.F	1980.96	20		2
			K.KGNVMETVDK.I	1203.65	20		3
			K.MEDDFPQWYTDVITK.T	1943.91	20		2
			K.TMWCGDAECEAK.I	1512.6	20		2
			R.EDNTSIVENMDEFRK.A	1881.88	20		3
			R.EGNLANPYHTSWGASTR.L	1888.89	20		3
			R.LIGGLIMTHSDNR.G	1453.77	8.47		3
			R.TYTIEAMMHDGK.A	1451.68	20		2
			R.TYTIEAMMHDGK.A	1451.68	10.68		3
			R.VAPIQVVIVPIAAK.K	1472.97	8.99		2
			K.AFDITFADR.E	1082.54	0		2
			K.ALCEELLAMPVVAGQK.S	1783.96	0		2
			K.FNEWEMK.G	1038.48	0		2
			K.HREDNTSIVENMDEFRK.A	2176.04	0		4
			K.KGNVMETVDK.I	1203.65	0		2
			K.MEDDFPQWYTDVITK.T	1943.91	0		3
			K.NCYFPLLIPESLLNK.E	1877.02	0		2
			K.NCYFPLLIPESLLNK.E	1877.02	0		3
			K.TDLVDYAPVK.G	1175.64	0		2
			R.EGNLANPYHTSWGASTR.L	1888.89	0		2
			R.KHREDNTSIVENMDEFRK.A	2332.17	0		4
			R.TSEFLWQEGHTLHETAEEAQEETIQQLEVYK.A	3760.8	0		4
			R.VAPIQVVIVPIAAK.K	1472.97	0		3
WP_009895184.1	cysteine--tRNA ligase	cysteine--tRNA			20	0	3
			R.ATVHPQVTDNIQQIIEFIK.E	2250.25	20		3
			K.GNFFTVR.D	867.46	0		2
			R.NPVNFSDEMLNQAK.A	1661.81	0		2
WP_009896192.1	cysteine desulfurase NifS	cysteine			20	0	3
			K.EVLDAMMPYLTDYFGNASSFHTFGR.E	2897.32	20		3
			K.ILFHTDAVQATGNIPVDVK.E	2094.16	20		3
			K.ELGIDLMSMSSHK.I	1502.75	0		3
			K.ENMQNHVETLTR.L	1498.72	0		2
			K.ENMQNHVETLTR.L	1498.72	0		3
			K.GVGALYIR.K	875.523	0		2
			R.LYMDYSATTPIKK.E	1613.87	0		3
			R.SMSPLYDDAK.K	1181.56	0		2
WP_009897862.1	pyruvate:ferredoxin (flavodoxin) oxidoreductase	pyruvate:ferredoxin			20	6.29	23
			K.ATPAAAMAK.F	886.495	20		2
			K.AVFTEWLDSR.N	1250.63	11.7		2
			K.FWGLGSDGTVGANK.Q	1463.74	2.89		2
			K.HFLDAMPSTVER.I	1429.7	20		2
			K.IVNMNYAAVDAGINALVK.V	1932.06	20		3
			K.VAGELLPGVFHVSAR.A	1578.89	20		3
			K.VVELLEKPACDCTDEK.A	1989.98	20		3
			K.YAQAYFDYDSK.K	1425.65	20		2
			K.YYQNIVGIVEK.Y	1380.77	8.97		2
			R.DNALSPNHPVAR.G	1317.68	8.38		2
			R.GTAQNPDIYFQTR.E	1537.75	8.77		2
			R.QTGCVLLASGSVQEVADIAPVAHLAAIEGR.L	3060.61	20		3
			R.TKEPGSTGEPLYLDVR.D	1816.96	20		2
			K.ALVM(15.995)KPIDTQLDTELDNWAFAVNPDEVAPK.G	460.272	0		3
			K.ALVMKPIDTQLDTELDNWAFAVNPDEVAPK.G	3425.77	0		3
			K.ALVMKPIDTQLDTELDNWAFAVNPDEVAPK.G	3425.77	0		4
			K.AVIEAEKHDGPSLIIAYAPCINHGLK.E	2900.57	0		5
			K.ENAPMIIGGR.Y	1084.57	0		2
			K.FYTVNAVK.L	996.564	0		2
			K.GDVMPANTVK.G	1086.57	0		2
			K.GPSWANSLFEDNAEYGFGMYTAVK.Q	2710.25	0		2
			K.GPSWANSLFEDNAEYGFGMYTAVK.Q	2710.25	0		3
			K.HSLFDYYGAEDAK.Y	1570.73	0		2
			K.HSLFDYYGAEDAK.Y	1570.73	0		3
			K.IVDAMTELVSMDICEDAK.A	2095.99	0		3
			K.IVNM(15.995)NYAAVDAGINALVK.V	503.278	0		3
			K.IVNMNYAAVDAGINALVK.V	1932.06	0		2
			K.LAEIIPEEDAVK.Y	1381.77	0		2
			K.LGQEIGLGNR.I	1083.6	0		2
			K.NGFTVGIVDDVTNTSLTPSEPIK.I	2460.28	0		2
			K.NPFTLDSK.E	976.523	0		2
			K.NPFTLDSKEPTASFK.D	1764.93	0		2
			K.QFPEEADGLFAK.A	1406.71	0		2
			K.QSYVYQYDLLK.G	1474.77	0		2
			K.SGGITMSHLR.F	1085.57	0		2
			K.TVFDNLVSEQPK.N	1431.76	0		2
			K.VEVPASWENAVDADKGEVK.E	2127.09	0		3
			K.VEVPASWENAVDADKGEVKEPEFIK.N	2898.51	0		4
			K.VVELLEKPACDCTDEK.A	1989.98	0		2
			K.YAQAYFDYDSKK.S	1581.77	0		2
			K.YAQAYFDYDSKK.S	1581.77	0		3
			R.ALASQALSIFGDHQDVM(15.995)AAR.Q	1829.9	0		3
			R.ALASQALSIFGDHQDVMAAR.Q	2129.08	0		3
			R.ATYLIDEADYIACHK.Q	1838.9	0		3
			R.DNALSPNHPVAR.G	1317.68	0		3
			R.INMIMQSAFFK.L	1384.72	0		2
			R.LPFIHFFDGFR.T	1422.74	0		3
			R.MMIANATGCSSIWGASAPSIPYTCNHEGK.G	3167.44	0		3
			R.MQLSPLDCTGCGNCADICPAK.E	2424.04	0		2
			R.TKEPGSTGEPLYLDVR.D	1816.96	0		3
			R.TVANEAQAVACGYWHLYR.F	2137.02	0		3
WP_009897922.1	phosphoenolpyruvate--protein phosphotransferase	phosphoenolpyruvate--protein			20	0	3
			K.AVLEGMDGKPIVIR.T	1552.9	20		3
			K.GIGASPGVALGK.A	1081.65	0		2
			K.ISYLYNQFNPAVLR.L	1725.93	0		2
WP_009897956.1	cell wall-binding protein Cwp2	cell			20	0	2
			K.ATELTVESTNEK.D	1376.7	20		2
			K.LVDGLAATPLAQSK.K	1438.84	20		2
			K.APIIVNGWNDLSADAIK.L	1853.01	0		2
			K.IYIVGGESAVSNTAK.K	1563.85	0		2
			K.KAPILLASDNEIPK.V	1591.95	0		3
			K.YTGGSQVGQPIYEIK.V	1694.89	0		2
WP_009898069.1	bifunctional acetaldehyde-CoA/alcohol dehydrogenase	bifunctional			20	6.4	23
			K.ANFVAIPTSAGTGSEVTPFAVITDQDTGVK.Y	3049.57	20		3
			K.AVTDLLDEMNIK.H	1416.75	20		2
			K.DMYLNSYYGR.-	1308.58	20		2
			K.ETGMGIAEDK.V	1105.53	6.95		2
			K.EVDLTLATGGPGMVK.S	1542.83	5.7		2
			K.HTTFFEVEPDPTLECAK.I	2076.99	20		2
			K.IAEPIGVIAAVVPTTNPTSTAIFK.A	2466.42	20		2
			K.IAEPIGVIAAVVPTTNPTSTAIFK.A	2466.42	6.9		3
			K.IFATYSQEQVDK.I	1483.76	8.84		2
			K.IFLAASLAANK.Q	1173.71	9.16		2
			K.LAGFEVPVDTK.V	1230.69	6.71		2
			K.LVEDGGFGHTSSLYIDDVNQR.E	2350.13	20		2
			K.NHYASEYIYNAYK.E	1690.8	20		2
			K.NHYASEYIYNAYK.E	1690.8	20		3
			K.SAYSSGKPAIGVGAGNTPAIIDDSADIK.T	2759.44	20		3
			K.SIFEYLPR.A	1051.57	20		2
			K.TAVNSILVSK.T	1086.66	6.86		2
			K.TCGVIEKDEAFGMTK.I	1768.87	20		2
			K.TCGVIEKDEAFGMTK.I	1768.87	6.83		3
			R.EFNPDVIISIGGGSAMDAGK.I	2034.02	20		3
			R.GAYLLDKDETEK.I	1464.77	20		2
			R.ILINTPSSQGGIGDLYNFK.L	2093.12	20		3
			R.YAEIASFLGLK.G	1266.72	7.29		2
			K.ASDFDDAVR.K	1022.47	0		2
			K.AVTDLLDEM(15.995)NIK.H	1033.5	0		2
			K.ENEVMSVGLDTVNNVESLVK.K	2232.14	0		3
			K.EVDLTLATGGPGMVK.S	1542.83	0		3
			K.FMDSIDEMVIQAFDDQCTGANPR.Y	2688.17	0		3
			K.FQSLLVAIEDLK.L	1430.84	0		2
			K.GNSDEEKFQSLLVAIEDLK.L	2219.18	0		3
			K.LAPSLTLGCGSWGGNSVSENVGVK.H	2445.24	0		2
			K.LAPSLTLGCGSWGGNSVSENVGVK.H	2445.24	0		3
			K.QRVPLAIMAQK.E	1309.79	0		3
			K.VLIGEVESVEIEEAFAHEK.L	2184.14	0		3
			R.AFIVTDTFLYNNGYTK.A	1922.99	0		2
			R.AFIVTDTFLYNNGYTK.A	1922.99	0		3
			R.GAYLLDKDETEKIR.N	1733.96	0		3
			R.ILINTPSSQGGIGDLYNFK.L	2093.12	0		2
			R.NGIIFSPHPR.A	1164.64	0		2
WP_009898301.1	phosphopyruvate hydratase	phosphopyruvate			20	5.67	23
			K.GLACGVGDEGGFAPNLGSNR.E	1975.93	20		2
			K.LQLVGDDLFVTNTER.L	1746.92	20		2
			K.RAGYTAVISHR.S	1257.69	7.32		3
			K.VNQIGTITETLDAIEMAK.R	2003.07	20		2
			R.AIVPSGASTGAFEAVELR.D	1801.96	20		2
			K.AGYKPGEDVMLGLDVAATEMYNK.E	2556.27	0		3
			K.GIENGVANSILVK.V	1368.8	0		2
			K.GLACGVGDEGGFAPNLGSNR.E	1975.93	0		3
			K.LGANAILGVSMAVAR.A	1469.84	0		3
			K.VNQIGTITETLDAIEMAK.R	2003.07	0		3
			R.AAADEIGLPLFQYLGGVNAK.Q	2103.14	0		2
			R.AAADEIGLPLFQYLGGVNAK.Q	2103.14	0		3
			R.AIVPSGASTGAFEAVELR.D	1801.96	0		3
			R.EALELIVEAITK.A	1383.82	0		2
			R.SGETEDSTIADLAVAVNAGQIK.T	2245.15	0		2
WP_009901573.1	adenylate kinase	adenylate			20	0	2
			K.GTQAAGIVEK.Y	1028.59	20		2
			K.YNIPHISTGDIFR.K	1559.81	0		3
WP_009901692.1	chaperonin GroEL	chaperonin			20	0	2
			K.AVTVAVEELK.N	1113.66	20		2
			K.ESTTIVDGSGDKK.A	1419.75	0		3
			K.HQVEQTTSDFDREK.L	1774.85	0		3
			K.ISNIQELLPVLEQIVQQGK.K	2205.28	0		3
			K.LAGGVAVVK.V	868.575	0		2
			K.NVTAGANPILLR.K	1265.75	0		2
WP_009901787.1	putative manganese-dependent inorganic diphosphatase	putative			20	0	3
			K.VVPLTPTSSILEAYNLMDEK.N	2276.21	20		3
			K.INGVSVVSVESDNYK.T	1664.86	0		2
			K.LLILTNHTEISK.D	1436.86	0		3
			K.QLVPNLTTAIK.N	1252.78	0		2
WP_009901809.1	(R)-2-hydroxyisocaproyl-CoA dehydratase subunit HadB	(R)-2-hydroxyisocaproyl-CoA			20	0	23
			K.KGSLELCEIAESK.G	1546.83	20		2
			K.YRVDSLVEGK.C	1220.68	20		3
			R.AAEETGLPYAGFDGDQADPR.A	2107.95	20		2
			R.VVINDLLAEQYANAFK.A	1864.02	20		2
			R.VVINDLLAEQYANAFK.A	1864.02	20		3
			K.AQFEEVIK.Q	1018.57	0		2
			K.LMSLIQYEMQR.R	1438.73	0		2
			K.YRVDSLVEGK.C	1220.68	0		2
			R.AAEETGLPYAGFDGDQADPR.A	2107.95	0		3
			R.IMMEGIPCWPYIGYK.M	1913.93	0		2
			R.RAAEETGLPYAGFDGDQADPR.A	2264.05	0		3
WP_009902143.1	formate C-acetyltransferase	formate			20	4.13	23
			K.AGIVTEEELQEYMDHFVMK.L	2325.11	12.97		3
			K.EQQLDVINR.T	1141.61	6.82		2
			K.LWDEAMVLFK.K	1306.7	20		2
			K.MVENSCEAFGYELDPEIKDIFTK.Y	2819.35	20		3
			K.SLEVSCMDEEVIR.L	1593.74	20		2
			K.VSIDTSSVQYENDDLMR.A	1999.92	20		2
			K.YGNNDDRVDSIAVELVESFMNK.I	2571.24	20		3
			R.AVMPYGGIK.M	990.557	10.63		2
			R.EFIQLNYSPYEGNDSFLAGATENTK.K	2864.36	20		2
			R.FEPITSEYLDYDEVMSK.F	2121.99	20		2
			R.KSGIITGLPDAYGR.G	1502.85	20		2
			R.LREEITEQISALNELKK.M	2098.21	20		3
			R.MLNTLYTLGPSPEPNLTVLWSTK.L	2631.41	20		3
			R.NSYPTQSILTITSNVVYGK.K	2141.14	20		2
			R.VALYGVDALIEDKNEQK.K	1989.09	20		3
			R.VALYGVDALIEDKNEQKK.S	2145.21	20		3
			K.EAVQWLYFGYLGAVK.D	1799.97	0		2
			K.EAVQWLYFGYLGAVK.D	1799.97	0		3
			K.ELETIVGLQTDAPLKR.A	1839.05	0		3
			K.KLWDEAMVLFK.K	1462.83	0		3
			K.MAESYGFDISKPATNSK.E	1929.96	0		2
			K.MAESYGFDISKPATNSK.E	1929.96	0		3
			K.SLEVSCM(15.995)DEEVIR.L	852.372	0		2
			K.THNQGVFDVYTPEMR.A	1820.85	0		2
			K.THNQGVFDVYTPEMR.A	1820.85	0		3
			K.TLLYAINGGVDEK.S	1447.79	0		2
			K.TVSGIAAYAPGYLDKELETIVGLQTDAPLKR.A	3373.86	0		4
			K.VSIDTSSVQYENDDLM(15.995)R.A	1842.82	0		2
			R.AGAPFAPGANPM(15.995)HGR.D	1127.54	0		3
			R.AGAPFAPGANPMHGR.D	1477.72	0		3
			R.ATLEDAM(15.995)EHPEEYPQLTIR.V	777.358	0		3
			R.AYWGDDYGIACCVSAMR.I	2022.85	0		2
			R.FEPITSEYLDYDEVMSK.F	2121.99	0		3
			R.INNLSAMMDGYFAQNAHHLNVNVFDR.A	3019.43	0		4
			R.KSGIITGLPDAYGR.G	1502.85	0		3
			R.LREEITEQISALNELKK.M	2098.21	0		4
			R.NEQGIAVDFEIEGDYPK.Y	1979.96	0		2
			R.NSYPTQSILTITSNVVYGK.K	2141.14	0		3
			R.TMACGMAGLSVCADSLSAIK.H	2099	0		3
			R.TSTFLDIYFER.D	1418.71	0		2
			R.VALYGVDALIEDKNEQK.K	1989.09	0		2
			R.VALYGVDALIEDKNEQKK.S	2145.21	0		4
WP_009902397.1	Fe-S cluster assembly scaffold protein NifU	Fe-S			20	0	23
			K.AALIDYAQK.N	1047.6	20		2
			K.MHCSVLAEQAVK.A	1427.73	20		3
			R.NMGEIDNASGVGEVGNPTCGDIMK.I	2521.13	20		2
			K.AVAEALDGLPPVK.M	1334.78	0		3
			K.IFLDIDGDVIK.D	1302.74	0		2
			K.TIKDALELTNK.A	1328.79	0		2
			K.TIKDALELTNK.A	1328.79	0		3
			R.NMGEIDNASGVGEVGNPTCGDIMK.I	2521.13	0		3
WP_009902921.1	flavodoxin	flavodoxin			20	0	2
			K.MANFVAEGVK.L	1120.6	20		2
			K.IYIVYWSGTGNTEK.M	1685.87	0		2
			K.QIGLFGSYGWGNCEWMR.D	2088.94	0		2
			R.MQNAGATIIGGEGITAMEDPNEEAKDECIELGK.T	3576.69	0		3
WP_009903219.1	histidinol-phosphate aminotransferase family protein	histidinol-phosphate			20	0	2
			K.AFQIIDNIE.-	1089.57	20		2
			K.ELPEVIK.A	882.543	0		2
			K.LLNNYDNVIALK.T	1444.83	0		2
			K.MHGATYDYVLLK.K	1465.76	0		3
			K.NKDIDLQQEFAK.L	1531.82	0		2
			K.NKDIDLQQEFAK.L	1531.82	0		3
			K.VLGYSPQFSEYETDIK.M	1931.96	0		2
WP_009903275.1	aminopeptidase P family protein	aminopeptidase			20	0	2
			K.FVNSSYIIDTLR.M	1454.78	20		2
			K.ATVSGELTEK.Q	1089.59	0		2
			R.AEAIVKPGVR.F	1094.68	0		2
			R.EIFEIVLEANKR.A	1515.87	0		3
WP_009904144.1	rod shape-determining protein	rod			20	0	3
			K.EVLAVGEEAKK.M	1255.74	20		3
			K.DAFLIEEPMAAAIGAGLK.V	1873.01	0		3
			K.SVEDQEIFEK.V	1278.63	0		2
WP_011861888.1	D-proline reductase (dithiol) protein PrdB	D-proline			20	9.23	23
			R.AIEEAGIPTIIIAALPPVVR.Q	2071.25	4.01		3
			R.DTLEQLVAIPSAGK.I	1496.85	20		2
			R.LHELAAEGFIK.G	1282.73	20		3
WP_003416023.1	phosphate propanoyltransferase	phosphate			0	0	2
			K.ESGDIAGTPGVK.L	1185.62	0		2
			R.ALVFENVLVR.A	1186.71	0		2
WP_003418888.1	acyl-CoA dehydrogenase	acyl-CoA			0	0	23
			K.AVQLHGGYGYTR.D	1348.69	0		3
			K.GISAFIVEK.G	1018.61	0		2
			K.GTPGFSFGVK.E	1051.57	0		2
			K.ITEIYEGTSEVQR.M	1551.78	0		3
			R.GSATSELIFEDCR.I	1511.69	0		2
WP_003419086.1	50S ribosomal protein L27	50S			0	0	2
			K.GSDDTLFALVDGTVK.F	1592.83	0		2
			K.VSIYPVAIAE.-	1088.61	0		2
WP_003419338.1	30S ribosomal protein S16	30S			0	0	2
			K.FIEEIGYYNPISEPK.Q	1854.95	0		2
			K.WLATGAQPTEVVK.K	1454.81	0		2
WP_003421107.1	50S ribosomal protein L13	50S			0	0	23
			K.SYIAKPADVQR.K	1302.73	0		2
			R.KWYLVDAEGK.T	1291.72	0		3
WP_003421117.1	50S ribosomal protein L17	50S			0	0	2
			R.KGDAAEMAFIELV.-	1448.76	0		2
			R.NLVTCLLR.S	1015.58	0		2
WP_003421125.1	30S ribosomal protein S13	30S			0	0	23
			K.RAEIGLTYIYGIGK.A	1608.92	0		3
			R.AEIGLTYIYGIGK.A	1452.82	0		2
WP_003421148.1	30S ribosomal protein S8	30S			0	0	23
			K.HETVDVPASNMK.K	1382.69	0		2
			K.VLNGLGISVISTSK.G	1442.87	0		2
			R.GYDVIEDGK.Q	1050.52	0		2
			R.ILLEEGFIR.G	1116.65	0		2
			R.VYAANHEIPK.V	1196.66	0		3
WP_003421160.1	50S ribosomal protein L16	50S			0	0	23
			R.VMFELAGVSEDK.A	1379.7	0		2
			R.VMFELAGVSEDKAR.E	1606.84	0		3
WP_003421186.1	50S ribosomal protein L7/L12	50S			0	0	23
			K.EGASKEEADQIKEK.L	1672.89	0		3
			R.EITGLGLK.E	885.553	0		2
WP_003429565.1	phosphoglycerate kinase	phosphoglycerate			0	0	23
			K.ELASLAEIFVNDAFGTAHR.A	2089.07	0		3
			K.EVVFAADDNVVGENAK.K	1731.87	0		2
			K.GEAKPELSLAPVAK.R	1492.89	0		3
			R.AHCSTVGAGEFLQER.V	1688.79	0		3
WP_003430157.1	NAD(P)/FAD-dependent oxidoreductase	NAD(P)/FAD-dependent			0	0	23
			K.APSIDNYLGFYDISGDELKDK.F	2444.22	0		3
			K.DSTAPSALVPGIEIDGIHIK.V	2089.15	0		3
			R.GVGYCATCDAPLYR.N	1629.73	0		2
WP_003430702.1	transketolase family protein	transketolase			0	0	2
			R.AATPDVNSENYK.F	1363.66	0		2
			R.GIPNMVVLNPADALEAR.Q	1806.97	0		2
WP_003432442.1	3-methyl-2-oxobutanoate dehydrogenase subunit VorB	3-methyl-2-oxobutanoate			0	0	23
			K.VLWPFPFEAFNQIPNAR.N	2074.09	0		2
			K.VLWPFPFEAFNQIPNAR.N	2074.09	0		3
			K.YFFGYPITPQSELPEYLSR.E	2335.16	0		2
			R.NILTVEMSMGQMVEDVK.M	1979.98	0		2
			R.VMTSSSSPGVALK.Q	1318.72	0		2
WP_003435668.1	50S ribosomal protein L6	50S			0	0	2
			K.YVDEVIR.R	920.497	0		2
			R.TLLDNMVVGVNTGFEK.K	1791.94	0		2
WP_003435867.1	methionine--tRNA ligase	methionine--tRNA			0	0	23
			K.TFGLIGENVK.V	1132.65	0		2
			R.EFAFGQDGSYTHR.N	1541.69	0		3
WP_003436174.1	DNA-directed RNA polymerase subunit beta	DNA-directed			0	0	23
			K.VLTDEDQEIEVR.E	1472.74	0		2
			R.EAPIIGTGIEYR.A	1345.72	0		2
			R.LSTIHIEEYECEAR.D	1776.84	0		3
WP_003436863.1	NADP-dependent glyceraldehyde-3-phosphate dehydrogenase	NADP-dependent			0	0	23
			K.ATDFVQGLVDDALHK.G	1683.88	0		3
			K.ISGMVPLLLELGGK.D	1481.89	0		2
			K.NMEGEAISGDNFPGGTR.N	1778.79	0		2
			R.GPDHFPFLGVK.A	1268.69	0		3
			R.GSEIGDYVVTHK.G	1359.7	0		2
WP_003436882.1	aminoacyl-histidine dipeptidase	aminoacyl-histidine			0	0	23
			K.ESTIEFLTSVR.S	1308.69	0		2
			K.GISDFLLSFGK.N	1238.69	0		2
			K.GYENCPGVVLQGHMDMVCEK.E	2379.06	0		3
			K.HEFTTSDPGMTYSVAETSVDK.V	2358.08	0		2
			K.HEFTTSDPGMTYSVAETSVDK.V	2358.08	0		3
			K.QINDILTAFK.H	1217.7	0		2
			R.VLSVLNVDYELASVDGGTK.H	2035.09	0		3
WP_003437525.1	NUDIX hydrolase	NUDIX			0	0	2
			K.EQALVEVSYK.K	1220.67	0		2
			K.ILGGGLPYESAVQR.V	1486.81	0		2
			K.MIDVAGDTMYEFFSR.S	1808.81	0		2
WP_003437561.1	hypothetical protein	hypothetical			0	0	23
			K.SQFIVTLIK.I	1103.7	0		2
			K.SYLTKEEFEELK.N	1598.84	0		3
WP_003437840.1	uracil phosphoribosyltransferase	uracil			0	0	23
			K.LANLVAAPEGIAEVQK.Y	1677.97	0		2
			K.LANLVAAPEGIAEVQK.Y	1677.97	0		3
WP_003438316.1	polyribonucleotide nucleotidyltransferase	polyribonucleotide			0	0	23
			K.TISQPKPELSPYAPK.I	1738.99	0		3
			R.ALLPVIPSQEEFPYAIR.L	1971.09	0		2
			R.DGIDFFPLSVDYEEK.L	1829.88	0		2
WP_003438808.1	4-hydroxy-tetrahydrodipicolinate reductase	4-hydroxy-tetrahydrodipicolinate			0	0	2
			K.EVLPNVENNYGR.Y	1430.72	0		2
			R.GLDSYEGDLK.I	1151.57	0		2
WP_003439900.1	proline iminopeptidase-family hydrolase	proline			0	0	2
			K.ALLDAVNTGDYSSK.E	1508.77	0		2
			R.ISYMSEVDQK.A	1254.62	0		2
WP_004454939.1	isoleucine--tRNA ligase	isoleucine--tRNA			0	0	2
			K.QQIEEYGIAEFNQK.C	1751.87	0		2
			R.ESVFSFEK.Q	1027.52	0		2
WP_004454961.1	sugar ABC transporter substrate-binding protein	sugar			0	0	2
			K.SFPDLNWGYVTSLEDK.T	1926.94	0		2
			K.SGTSDNYLYLDDAK.M	1616.76	0		2
WP_009887891.1	MULTISPECIES: 50S ribosomal protein L22	MULTISPECIES:			0	0	23
			K.LYIASIVANQGPTMK.R	1660.92	0		2
			K.LYIASIVANQGPTMK.R	1660.92	0		3
			R.GKNVDEALAILK.F	1353.82	0		3
WP_009889364.1	tyrosine--tRNA ligase	tyrosine--tRNA			0	0	2
			K.ESELVVQIGK.K	1156.67	0		2
			K.SMEIPDELIIK.Y	1342.74	0		2
WP_009892314.1	sulfurtransferase-like selenium metabolism protein YedF	sulfurtransferase-like			0	0	2
			K.LQVGTVTNMYTIVETLK.N	1966.09	0		2
			K.LSAENEETIENLK.I	1544.79	0		2
WP_009892576.1	NAD(P)/FAD-dependent oxidoreductase	NAD(P)/FAD-dependent			0	0	2
			K.VVQTEDITVNYDK.L	1578.81	0		2
			R.GIIIDDMCQTTQK.D	1577.78	0		2
WP_009897666.1	DUF2156 domain-containing protein	DUF2156			0	0	2
			R.DLFDYIYDAESLR.T	1646.78	0		2
			R.GLYPFINQQFLVSEFK.D	1986.07	0		2
WP_009897984.1	alanine racemase	alanine			0	0	2
			K.ISEVATPNFLLDLDQLEK.N	2101.14	0		2
			K.NAGASGFLAGTLDEGEALIK.A	1990.05	0		2
WP_009901578.1	pyridoxal phosphate-dependent aminotransferase	pyridoxal			0	0	2
			K.YDLVPGLK.I	959.569	0		2
			R.ISYACSENTFLSGLDK.L	1860.9	0		2
WP_009901581.1	anaerobic ribonucleoside triphosphate reductase	anaerobic			0	0	2
			R.AGAQVPFSSVNFGTDTSEEGR.M	2184.02	0		2
			R.GLGNGETPIFPILIFK.V	1772.03	0		2
WP_009902521.1	cell wall-binding protein Cwp20	cell			0	0	2
			K.MFTTTAVMK.L	1084.57	0		2
			K.NVYVVGGEASINEK.S	1533.8	0		2
WP_009903330.1	M60 family metallopeptidase	M60			0	0	2
			R.ATLTDVTTVNQEINK.L	1701.91	0		2
			R.YNDLQGDTPVGQR.F	1489.72	0		2
WP_009903754.1	porphobilinogen synthase	porphobilinogen			0	0	23
			K.AGADMVAPSDMMDGR.I	1550.65	0		2
			K.EGLLNEDVILESITSIKR.A	2085.18	0		3
			R.AGADIIITYFAK.D	1337.76	0		2
WP_009903787.1	ATP synthase F1 subunit gamma	ATP			0	0	2
			R.EYFNTLYNTVK.D	1446.74	0		2
			R.GLAGGYNSNVLK.E	1247.69	0		2
WP_025992020.1	Nif3-like dinuclear metal center hexameric protein	Nif3-like			0	0	23
			K.NLGLESEFLQGK.Y	1389.75	0		2
			K.VYTTTFPDKEIIK.Q	1637.93	0		3
WP_025992040.1	2,3-bisphosphoglycerate-independent phosphoglycerate mutase	2,3-bisphosphoglycerate-independent			0	0	23
			K.AVETVDTCVGK.L	1233.63	0		2
			K.VATYDLKPEMSAYELTDK.A	2158.09	0		3
contaminant_GR78_HUMAN	owl|P11021| 78 KD GLUCOSE REGULATED PROTEIN PRECURSOR (GRP 78)	owl|P11021|			0	0	2
			K.DAGTIAGLNVMR.I	1244.65	0		2
			K.NQLTSNPENTVFDAK.R	1732.86	0		2
			R.IINEPTAAAIAYGLDK.R	1714.95	0		2
contaminant_GR78_MESAU	owl|P07823| 78 KD GLUCOSE REGULATED PROTEIN PRECURSOR (GRP 78)	owl|P07823|			0	0	2
			K.DAGTIAGLNVMR.I	1244.65	0		2
			K.NQLTSNPENTVFDAK.R	1732.86	0		2
			R.IINEPTAAAIAYGLDK.R	1714.95	0		2
contaminant_GR78_MOUSE	owl|P20029| 78 KD GLUCOSE REGULATED PROTEIN PRECURSOR (GRP 78)	owl|P20029|			0	0	2
			K.DAGTIAGLNVMR.I	1244.65	0		2
			K.NQLTSNPENTVFDAK.R	1732.86	0		2
			R.IINEPTAAAIAYGLDK.R	1714.95	0		2
contaminant_GR78_RAT	owl|P06761| 78 KD GLUCOSE REGULATED PROTEIN PRECURSOR (GRP 78)	owl|P06761|			0	0	2
			K.DAGTIAGLNVMR.I	1244.65	0		2
			K.NQLTSNPENTVFDAK.R	1732.86	0		2
			R.IINEPTAAAIAYGLDK.R	1714.95	0		2
contaminant_INT-STD1	BSA BSA	BSA			0	0	23
			K.LGEYGFQNALIVR.Y	1506.82	0		2
			R.KVPQVSTPTLVEVSR.S	1694.99	0		3
			R.RHPEYAVSVLLR.L	1466.84	0		3
contaminant_KERATIN14	no description	no			0	0	2
			K.DVDAAFMNK.V	1065.52	0		2
			K.LALDVEIATYR.K	1290.72	0		2
			K.LLEGEECR.M	1032.49	0		2
			R.DYQELMNVK.L	1194.6	0		2
			R.KLLEGEECR.M	1188.62	0		2
contaminant_KERATIN19	no description	no			0	0	23
			R.TAAENEFVVLK.K	1275.71	0		2
			R.TAAENEFVVLKK.D	1431.83	0		3
contaminant_KERATIN20	no description	no			0	0	2
			K.AQYEDIANR.S	1106.54	0		2
			R.EYQELMNVK.L	1208.61	0		2
contaminant_KERATIN05	no description	no			0.02	0.01	2
			K.VTMQNLNDR.L	1117.56	0.02		2
			R.EVATNSELVQSGK.S	1416.75	0.01		2
			R.VLDELTLAR.A	1056.62	0.02		2
			K.ASLENSLEETK.G	1275.66	0		2
			K.ASLENSLEETKGR.Y	1488.78	0		2
			K.DAEEWFFTK.T	1227.58	0		2
			K.ILTATVDNANVLLQIDNAR.L	2082.15	0		2
			K.ILTATVDNANVLLQIDNAR.L	2082.15	0		3
			K.NHEEEMNALR.G	1269.58	0		2
			K.NHEEEMNALR.G	1269.58	0		3
			K.TEELNREVATNSELVQSGK.S	2160.11	0		3
			K.TRLEQEIATYR.R	1406.75	0		2
			K.TRLEQEIATYR.R	1406.75	0		3
			K.VMDVHDGK.V	955.48	0		2
			K.VMDVHDGKVVSTHEQVLR.T	2105.11	0		5
			K.VVSTHEQVLR.T	1194.67	0		2
			R.ADLEMQIESLKEELAYLK.K	2207.18	0		3
			R.ADLEMQIESLKEELAYLKK.N	2363.31	0		4
			R.ALEEANADLEVK.I	1356.71	0		2
			R.ALEEANADLEVK.I	1356.71	0		3
			R.CEMEQQNQEYK.I	1541.65	0		2
			R.GQVGGDVNVEM(15.995)DAAPGVDLSR.I	1131.52	0		2
			R.GQVGGDVNVEM(15.995)DAAPGVDLSR.I	1131.52	0		3
			R.GQVGGDVNVEMDAAPGVDLSR.I	2114.01	0		2
			R.ISSVLAGGSCR.A	1133.59	0		2
			R.KDAEEWFFTK.T	1383.71	0		2
			R.KDAEEWFFTK.T	1383.71	0		3
			R.LEQEIATYR.R	1149.6	0		2
			R.LLEGEDAHLSSSQFSSGSQSSR.D	2337.09	0		2
			R.LLEGEDAHLSSSQFSSGSQSSR.D	2337.09	0		3
			R.MSVEADINGLR.R	1231.62	0		2
			R.MSVEADINGLRR.V	1387.72	0		2
			R.QFTSSSSMK.G	1057.51	0		2
			R.QRPAEIKDYSPYFK.T	1825.98	0		4
			R.RLLEGEDAHLSSSQFSSGSQSSR.D	2493.19	0		3
			R.RLLEGEDAHLSSSQFSSGSQSSR.D	2493.19	0		4
			R.TKYETELNLR.M	1321.72	0		3
			R.TMQNLEIELQSQLSMK.A	1949	0		2
			R.TMQNLEIELQSQLSMK.A	1949	0		3
			R.YCM(15.995)QLAQIQEM(15.995)IGSVEEQLAQLR.C	500.176	0		3
contaminant_KERATIN06	no description	no			0.02	0	2
			R.VLDELTLAR.T	1056.62	0.02		2
			K.EVASNTEMIQTSK.T	1492.74	0		2
			K.IMATTIDNSR.V	1148.59	0		2
			K.TRLEQEIATYR.S	1406.75	0		2
			K.TRLEQEIATYR.S	1406.75	0		3
			R.ALEEANADLEVK.I	1356.71	0		2
			R.ALEEANADLEVK.I	1356.71	0		3
			R.CEMEAQNQEYK.M	1484.63	0		2
			R.DVEAWFFSK.T	1183.59	0		2
			R.FVSSGSGGGYGGGMR.V	1402.63	0		2
			R.GGSLLAGGGGFGGGSLSGGGGSR.S	1848.91	0		2
			R.LEQEIATYR.S	1149.6	0		2
contaminant_KERATIN07	no description	no			0.02	0	2
			R.VLDELTLAR.T	1056.62	0.02		2
			K.ASLENSLEETK.G	1275.66	0		2
			K.IIAATIENAQPILQIDNAR.L	2092.17	0		2
			K.IIAATIENAQPILQIDNAR.L	2092.17	0		3
			K.NHEEEMLALR.G	1268.62	0		2
			K.NHEEEMLALR.G	1268.62	0		3
			K.TRLEQEIATYR.R	1406.75	0		2
			K.TRLEQEIATYR.R	1406.75	0		3
			R.ALEEANADLEVK.I	1356.71	0		2
			R.ALEEANADLEVK.I	1356.71	0		3
			R.KNHEEEMLALR.G	1424.74	0		3
			R.LEQEIATYR.R	1149.6	0		2
contaminant_KERATIN08	no description	no			0.02	0	2
			K.VTMQNLNDR.L	1117.56	0.02		2
			R.VLDELTLAR.T	1056.62	0.02		2
			K.ASLENSLEETK.G	1275.66	0		2
			K.ASLENSLEETKGR.Y	1488.78	0		2
			K.EVASNSELVQSSR.S	1432.72	0		2
			K.EVASNSELVQSSR.S	1432.72	0		3
			K.NHEEEMLALR.G	1268.62	0		2
			K.NHEEEMLALR.G	1268.62	0		3
			K.TEELNKEVASNSELVQSSR.S	2176.11	0		2
			K.TEELNKEVASNSELVQSSR.S	2176.11	0		3
			K.TRLEQEIATYR.R	1406.75	0		2
			K.TRLEQEIATYR.R	1406.75	0		3
			R.ALEEANADLEVK.I	1356.71	0		2
			R.ALEEANADLEVK.I	1356.71	0		3
			R.CEM(15.995)EQQSQEYQILLDVK.T	466.156	0		2
			R.CEM(15.995)EQQSQEYQILLDVK.T	466.156	0		3
			R.CEMEQQSQEYQILLDVK.T	2197.05	0		2
			R.CEMEQQSQEYQILLDVK.T	2197.05	0		3
			R.DAETWFLSK.T	1151.59	0		2
			R.DQYEQMAEK.N	1196.54	0		2
			R.GQTGGDVNVEM(15.995)DAAPGVDLSR.I	1133.5	0		2
			R.GQTGGDVNVEM(15.995)DAAPGVDLSR.I	1133.5	0		3
			R.GQTGGDVNVEMDAAPGVDLSR.I	2115.99	0		2
			R.GQTGGDVNVEMDAAPGVDLSR.I	2115.99	0		3
			R.ILNEMRDQYEQMAEK.N	1953.94	0		2
			R.KNHEEEMLALR.G	1424.74	0		3
			R.LEQEIATYR.R	1149.6	0		2
			R.LLEGEDAHLSSQQASGQSY.S	2047.95	0		2
			R.LLEGEDAHLSSQQASGQSYSSR.E	2378.12	0		3
			R.QFTSSSSMK.G	1057.51	0		2
			R.QRPSEIKDYSPYFK.T	1841.98	0		2
			R.QRPSEIKDYSPYFK.T	1841.98	0		3
			R.QRPSEIKDYSPYFK.T	1841.98	0		4
			R.QTVEADVNGLR.R	1228.64	0		2
			R.RLLEGEDAHLSSQQASGQSYSSR.E	2534.22	0		3
			R.TDLEMQIEGLK.E	1331.7	0		2
			R.VLQGLEIELQSQLSM(15.995)K.A	1714.92	0		2
			R.VLQGLEIELQSQLSM(15.995)K.A	1714.92	0		3
			R.VLQGLEIELQSQLSMK.A	1872.05	0		2
			R.VLQGLEIELQSQLSMK.A	1872.05	0		3
contaminant_KERATIN10	no description	no			0.02	0	2
			R.VLDELTLAR.T	1056.62	0.02		2
			K.SRLEQEIATYR.S	1392.74	0		2
			K.SRLEQEIATYR.S	1392.74	0		3
			R.LEQEIATYR.S	1149.6	0		2
			R.MSVEADINGLR.R	1231.62	0		2
			R.MSVEADINGLRR.V	1387.72	0		2
			R.TDLEMQIEGLK.E	1331.7	0		2
contaminant_KERATIN12	no description	no			0.02	0.01	2
			R.EVATNSELVQSGK.S	1416.75	0.01		2
			R.VLDELTLAR.A	1056.62	0.02		2
			K.NHEEEMNALR.G	1269.58	0		2
			K.NHEEEMNALR.G	1269.58	0		3
			K.TEELNREVATNSELVQSGK.S	2160.11	0		3
			K.TRLEQEIATYR.R	1406.75	0		2
			K.TRLEQEIATYR.R	1406.75	0		3
			R.ALEEANTELEVK.I	1400.74	0		2
			R.CEMEQQNQEYK.I	1541.65	0		2
			R.LEQEIATYR.R	1149.6	0		2
			R.LLEGEDAHLTQYK.K	1571.82	0		3
contaminant_KERATIN17	no description	no			0.03	0	2
			R.NLDLDSIIAEVK.A	1384.78	0.03		2
			K.DVDAAYMNKVELEAK.V	1778.91	0		2
			K.DVDAAYMNKVELEAK.V	1778.91	0		3
			K.KQCANLQNAIADAEQR.G	1884.95	0		3
			K.LAELEEALQK.A	1198.68	0		2
			K.LALDVEIATYR.K	1290.72	0		2
			K.LLEGEECR.L	1032.49	0		2
			K.QCANLQNAIADAEQR.G	1728.82	0		2
			K.QCANLQNAIADAEQR.G	1728.82	0		3
			K.VDALMDEINFMK.M	1480.73	0		2
			R.EYQELMNTK.L	1210.59	0		2
			R.GLGVGFGSGGGSSSSVK.F	1494.77	0		2
			R.KLLEGEECR.L	1188.62	0		2
			R.LRAEIDNVKK.Q	1268.78	0		3
			R.NMQDLVEDFK.N	1293.63	0		2
			R.QLDSIVGER.G	1043.56	0		2
			R.QNLEPLFEQYINNLR.R	1919	0		2
			R.QNLEPLFEQYINNLR.R	1919	0		3
			R.QNLEPLFEQYINNLRR.Q	2075.1	0		3
			R.RQLDSIVGER.G	1199.66	0		2
			R.SFSTASAITPSVSR.T	1437.75	0		2
			R.SRTEAESWYQTK.Y	1540.75	0		2
			R.SRTEAESWYQTK.Y	1540.75	0		3
			R.TEAESWYQTK.Y	1297.62	0		2
			R.VSLAGACGVGGYGSR.S	1437.7	0		2
			R.VSLAGACGVGGYGSR.S	1437.7	0		3
contaminant_KERATIN18	no description	no			0.03	0	2
			K.AQYEEIAQR.S	1134.57	0.03		2
			R.NLDLDSIIAEVK.A	1384.78	0.03		2
			K.ADTLTDEINFLR.A	1434.74	0		2
			K.ADTLTDEINFLR.A	1434.74	0		3
			K.EYQELMNVK.L	1208.61	0		2
			K.KQCANLQAAIADAEQR.G	1841.94	0		2
			K.KQCANLQAAIADAEQR.G	1841.94	0		3
			K.LALDVEIATYR.K	1290.72	0		2
			K.LEGLEDALQK.A	1170.65	0		2
			K.LLEGEECR.L	1032.49	0		2
			K.NKLEGLEDALQK.A	1440.82	0		2
			K.NKLEGLEDALQK.A	1440.82	0		3
			K.QCANLQAAIADAEQR.G	1685.82	0		2
			K.QCANLQAAIADAEQR.G	1685.82	0		3
			K.QEIAEINR.M	999.535	0		2
			K.RISIGGGSCAISGGYGSR.A	1781.88	0		3
			K.YEELQVTAGR.H	1192.61	0		2
			R.AEAESWYQTK.Y	1267.61	0		2
			R.ALYDAELSQM(15.995)QTHISDTSVVLSM(15.995)DNNR.N	1167.55	0		3
			R.ALYDAELSQM(15.995)QTHISDTSVVLSMDNNR.N	1167.55	0		3
			R.ALYDAELSQMQTHISDTSVVLSM(15.995)DNNR.N	2567.23	0		3
			R.ALYDAELSQMQTHISDTSVVLSMDNNR.N	3066.45	0		2
			R.ALYDAELSQMQTHISDTSVVLSMDNNR.N	3066.45	0		3
			R.ATGGGLSSVGGGSSTIK.Y	1490.79	0		2
			R.GSGGLGGACGGAGFGSR.S	1451.66	0		2
			R.ISIGGGSCAISGGYGSR.A	1625.78	0		2
			R.ISIGGGSCAISGGYGSR.A	1625.78	0		3
			R.KLLEGEECR.L	1188.62	0		2
			R.LLKEYQELMNVK.L	1590.91	0		2
			R.LLKEYQELMNVK.L	1590.91	0		3
			R.LRSEIDHVK.K	1151.67	0		2
			R.LRSEIDHVKK.Q	1307.79	0		3
			R.NMQDLVEDLK.N	1259.64	0		2
			R.NTKQEIAEINR.M	1370.75	0		2
			R.NTKQEIAEINR.M	1370.75	0		3
			R.QLDSIVGER.G	1043.56	0		2
			R.QNLEPLFEQYINNLR.R	1919	0		2
			R.QNLEPLFEQYINNLR.R	1919	0		3
			R.QNLEPLFEQYINNLRR.Q	2075.1	0		3
			R.RGFSASSAR.L	965.504	0		2
			R.RQLDSIVGER.G	1199.66	0		2
			R.SEIDHVKK.Q	1038.61	0		2
			R.SGFSSISVSR.S	1053.55	0		2
			R.SLYGLGGSK.R	936.528	0		2
			R.SLYGLGGSKR.I	1092.63	0		2
			R.SRAEAESWYQTK.Y	1510.74	0		2
			R.SRAEAESWYQTK.Y	1510.74	0		3
			R.TAAENEFVTLK.K	1277.69	0		2
			R.TAAENEFVTLKK.D	1433.81	0		2
			R.TAAENEFVTLKK.D	1433.81	0		3
contaminant_KERATIN21	no description	no			0.03	0.01	2
			K.AQYEEIAQR.S	1134.57	0.03		2
			R.AIGGGLSSVGGGSSTIK.Y	1502.83	0.01		2
			R.NLDLDSIIAEVK.A	1384.78	0.03		2
			-.QNLEPLFEQYINNLR.R	1919	0		2
			-.QNLEPLFEQYINNLR.R	1919	0		3
			-.QNLEPLFEQYINNLRR.Q	2075.1	0		3
			K.ADTLTDEINFLR.A	1434.74	0		2
			K.ADTLTDEINFLR.A	1434.74	0		3
			K.EYQELMNVK.L	1208.61	0		2
			K.KQCANLQAAIADAEQR.G	1841.94	0		2
			K.KQCANLQAAIADAEQR.G	1841.94	0		3
			K.LALDVEIATYR.K	1290.72	0		2
			K.LEGLEDALQK.A	1170.65	0		2
			K.LLEGEECR.L	1032.49	0		2
			K.NKLEGLEDALQK.A	1440.82	0		2
			K.NKLEGLEDALQK.A	1440.82	0		3
			K.QCANLQAAIADAEQR.G	1685.82	0		2
			K.QCANLQAAIADAEQR.G	1685.82	0		3
			K.QEIAEINR.M	999.535	0		2
			K.YEELQVTAGR.H	1192.61	0		2
			R.AEAESWYQTK.Y	1267.61	0		2
			R.ALYDAELSQM(15.995)QTHISDTSVVLSM(15.995)DNNR.N	1167.55	0		3
			R.ALYDAELSQM(15.995)QTHISDTSVVLSMDNNR.N	1167.55	0		3
			R.ALYDAELSQMQTHISDTSVVLSM(15.995)DNNR.N	2567.23	0		3
			R.ALYDAELSQMQTHISDTSVVLSMDNNR.N	3066.45	0		2
			R.ALYDAELSQMQTHISDTSVVLSMDNNR.N	3066.45	0		3
			R.GMQDLVEDFK.N	1236.61	0		2
			R.GMQDLVEDFKNK.Y	1506.78	0		3
			R.GMQDLVEDFKNKYEDEINKR.T	2583.31	0		3
			R.GMQDLVEDFKNKYEDEINKR.T	2583.31	0		4
			R.GMQDLVEDFKNKYEDEINKR.T	2583.31	0		5
			R.KLLEGEECR.L	1188.62	0		2
			R.LLKEYQELMNVK.L	1590.91	0		2
			R.LLKEYQELMNVK.L	1590.91	0		3
			R.NTKQEIAEINR.M	1370.75	0		2
			R.NTKQEIAEINR.M	1370.75	0		3
			R.QLDSIVGER.G	1043.56	0		2
			R.RQLDSIVGER.G	1199.66	0		2
			R.SRAEAESWYQTK.Y	1510.74	0		2
			R.SRAEAESWYQTK.Y	1510.74	0		3
			R.TAAENEFVTLK.K	1277.69	0		2
			R.TAAENEFVTLKK.D	1433.81	0		2
			R.TAAENEFVTLKK.D	1433.81	0		3
contaminant_KERATIN02	no description	no			0.3	0.31	23
			K.DIENQYETQITQIEHEVSSSGQEVQSSAK.E	3320.57	0.22		3
			K.EIETYHNLLEGGQEDFESSGAGK.I	2566.19	0.17		2
			K.EIETYHNLLEGGQEDFESSGAGK.I	2566.19	0.24		3
			K.STMQELNSR.L	1092.52	0.36		2
			K.TLLDIDNTR.M	1087.59	0.36		2
			K.VQALEEANNDLENK.I	1641.82	0.22		2
			K.VQALEEANNDLENK.I	1641.82	0.2		3
			R.GGGGSFGYSYGGGSGGGFSASSLGGGFGGGSR.G	2733.19	0.6		2
			R.GGSGGSYGGGGSGGGYGGGSGSR.G	1818.75	1.37		2
			R.IKFEMEQNLR.Q	1362.73	0.31		3
			R.MTLDDFR.I	924.438	0.36		2
			R.QEYEQLIAK.N	1176.64	0.29		2
			R.QGVDADINGLR.Q	1184.62	0.5		2
			R.QVLDNLTMEK.S	1245.66	0.21		2
			K.IQDWYDK.K	1022.51	0		2
			K.NYSPYYNTIDDLKDQIVDLTVGNNK.T	2986.5	0		3
			K.SDLEMQYETLQEELMALKK.N	2383.21	0		3
			K.TLNDMRQEYEQLIAK.N	1907.99	0		3
			R.GGSGGSYGGGSGSGGGSGGGYGGGSGGGHSGGSGGGHSGGSGGNYGGGSGSGGGSGGGYGGGSGSR.G	5001.97	0		4
			R.HGVQELEIELQSQLSK.K	1894.02	0		2
			R.HGVQELEIELQSQLSK.K	1894.02	0		3
contaminant_KERATIN13	no description	no			0.4	0.13	23
			K.AEAESLYQSK.Y	1180.6	0.44		2
			K.DVDGAYMTK.V	1054.5	0.3		2
			K.LNDLEDALQQAK.E	1412.75	0.43		2
			K.NMQDMVEDYR.N	1327.55	0.26		2
			K.QISNLQQSISDAEQR.G	1743.88	0.34		2
			K.SKAEAESLYQSK.Y	1423.76	0.36		2
			K.SKAEAESLYQSK.Y	1423.76	0.37		3
			K.WELLQQVDTSTR.T	1502.77	0.39		2
			K.YEELQITAGR.H	1206.62	0.4		2
			R.FLEQQNQVLQTK.W	1530.84	0.4		2
			R.GGGGGGYGSGGSSYGSGGGSYGSGGGGGGGR.G	2411.98	0.72		2
			R.THNLEPYFESFINNLR.R	2022	0.54		3
			R.TLLEGEESR.M	1060.54	0.68		2
			R.TNAENEFVTIK.K	1320.69	0.47		2
			R.TNAENEFVTIKK.D	1476.82	0.56		3
			K.NKLNDLEDALQQAK.E	1682.92	0		2
			K.NKLNDLEDALQQAK.E	1682.92	0		3
			K.QISNLQQSISDAEQRGENALK.D	2385.23	0		3
			K.SLNNQFASFIDK.V	1438.75	0		2
			K.SLNNQFASFIDKVR.F	1693.92	0		3
			R.DYQELMNTK.L	1196.57	0		2
			R.FLEQQNQVLQTK.W	1530.84	0		3
			R.LLRDYQELMNTK.L	1578.84	0		3
			R.LRSEIDNVKK.Q	1284.78	0		3
			R.THNLEPYFESFINNLR.R	2022	0		2
			R.TNAENEFVTIKK.D	1476.82	0		2
contaminant_KERATIN22	no description	no			0.66	6.15	2
			K.AQYEEIAQR.S	1134.57	0.03		2
			K.GGSISGGGYGSGGGK.H	1252.6	1.04		2
			K.VDLLNQEIEFLK.V	1515.85	0.61		2
			K.VDPEIQNVK.A	1096.61	0.72		2
			K.YEELQVTVGR.H	1220.64	0.59		2
			R.FLEQQNQVLQTK.W	1530.84	0.4		2
			R.GFSSGSAVVSGGSR.R	1281.63	20		2
			R.HGGGGGGFGGGGFGSR.S	1347.61	1.03		2
			R.NLDLDSIIAEVK.A	1384.78	0.03		2
			R.YLDGLTAER.T	1064.55	0.73		2
			K.DVDNAYMIK.V	1123.56	0		2
			K.LALDVEIATYR.K	1290.72	0		2
			K.LLEGEECR.M	1032.49	0		2
			R.DYQELMNVK.L	1194.6	0		2
			R.FGGFGGPGGVGGLGGPGGFGPGGYPGGIHEVSVNQSLLQPLNVK.V	4149.13	0		3
			R.FGGFGGPGGVGGLGGPGGFGPGGYPGGIHEVSVNQSLLQPLNVK.V	4149.13	0		4
			R.FLEQQNQVLQTK.W	1530.84	0		3
			R.GGSGGGGSISGGGYGSGGGSGGR.Y	1768.77	0		2
			R.GSSSGGGYSSGSSSYGSGGR.Q	1767.73	0		2
			R.KLLEGEECR.M	1188.62	0		2
			R.SKEEAEALYHSK.Y	1474.77	0		2
			R.SKEEAEALYHSK.Y	1474.77	0		3
			R.TAAENDFVTLK.K	1263.67	0		2
			R.TAAENDFVTLKK.D	1419.8	0		3
			R.TSQNSELNNMQDLVEDYK.K	2184.01	0		2
contaminant_KERATIN04	no description	no			0.67	0	2
			R.QSVEADINGLR.R	1228.64	0.67		2
			K.TRLEQEIATYR.S	1406.75	0		2
			K.TRLEQEIATYR.S	1406.75	0		3
			R.ALEEANADLEVK.I	1356.71	0		2
			R.ALEEANADLEVK.I	1356.71	0		3
			R.LASYLEK.V	878.511	0		2
			R.LEQEIATYR.S	1149.6	0		2
contaminant_KERATIN03	no description	no			0.81	0.25	23
			K.GSLGGGFSSGGFSGGSFSR.G	1734.8	0.99		2
			K.NHEEEMKDLR.N	1355.65	0.75		3
			K.QSLEASLAETEGR.Y	1417.7	1.01		2
			K.VTMQNLNDR.L	1117.56	0.02		2
			R.ALEESNYELEGK.I	1436.7	0.82		2
			R.LKYENEVALR.Q	1289.73	0.65		2
			R.LKYENEVALR.Q	1289.73	0.75		3
			R.QSVEADINGLR.R	1228.64	0.67		2
			R.SLLEGEGSSGGGGR.G	1289.62	0.81		2
			R.SQYEQLAEQNR.K	1392.66	0.77		2
			R.SQYEQLAEQNRK.D	1548.79	0.91		2
			R.SQYEQLAEQNRK.D	1548.79	0.95		3
			R.VLDELTLTK.A	1086.65	0.9		2
			K.ELTTEIDNNIEQISSYK.S	2053.03	0		2
			K.IRLENEIQTYR.S	1461.79	0		2
			K.IRLENEIQTYR.S	1461.79	0		3
			R.ISSSKGSLGGGFSSGGFSGGSFSR.G	2266.11	0		3
			R.KDAEAWFNEK.S	1320.67	0		3
			R.LENEIQTYR.S	1192.61	0		2
			R.NVQALEIELQSQLALK.Q	1853.07	0		2
			R.NVQALEIELQSQLALK.Q	1853.07	0		3
			R.NVSTGDVNVEM(15.995)NAAPGVDLTQLLNNMR.S	1191.54	0		2
			R.NVSTGDVNVEM(15.995)NAAPGVDLTQLLNNMR.S	1191.54	0		3

## Sheet: Probe 1_competition
Replicate 1 : probe 1–C. difficile–competition
Accession	description	symbol	sequence	mass	median ratio	standard deviation	charge
WP_003439110.1	ornithine cyclodeaminase family protein	ornithine			0.63	0	2
			R.TGAASGAAIDVLAK.K	1299.74	0.63		2
			K.TVGIGVQDVVTAK.R	1341.79	0		2
WP_003429730.1	50S ribosomal protein L20	50S			0.82	0	3
			K.LYRPANTFVMK.A	1394.77	0.82		3
			K.M(15.995)LSEM(15.995)AIQDPEGFAK.L	177.082	0		2
			K.M(15.995)LSEMAIQDPEGFAK.L	177.082	0		2
			K.MLSEM(15.995)AIQDPEGFAK.L	637.282	0		2
			K.MLSEMAIQDPEGFAK.L	1721.84	0		2
WP_003421141.1	50S ribosomal protein L18	50S			0.86	0	2
			K.GITEVVFDR.G	1062.57	0.86		2
			R.SANNIYAQIIDDTKR.V	1776.94	0		3
WP_003429729.1	50S ribosomal protein L35	50S			0.93	0.06	23
			K.STLVSDGDAK.R	1047.54	0.97		2
			R.KSTLVSDGDAKR.I	1359.77	0.89		3
WP_003425597.1	pyruvate carboxylase	pyruvate			1.01	2.22	234
			K.ADESYLIGEGK.G	1236.62	0.88		2
			K.ADMNDPLQIGASIPGK.V	1681.87	1.02		2
			K.ADMNDPLQIGASIPGK.V	1681.87	1.04		3
			K.AFGEDIIFIEK.Y	1336.73	0.82		2
			K.DLQEVVLKGEEAITVRPGSLLPAEDFDEIAK.Y	3466.87	0.84		4
			K.DMSGLLKPYSAYTLVK.E	1870.04	1.27		2
			K.DMSGLLKPYSAYTLVK.E	1870.04	1.29		3
			K.EANEVVGDIIK.V	1241.69	0.95		2
			K.EICEDAVK.L	1018.5	0.83		2
			K.EKPLFDALHDPR.M	1492.8	0.96		3
			K.EVNVQTIPGVEK.A	1367.77	1.05		2
			K.FESDLTNSCAEIYNFEIPGGQYTNLKPQADSLGLVNR.F	4218.05	0.62		3
			K.FIDENPDLFEITESK.D	1852.92	0.91		2
			K.FIDENPDLFEITESKDR.G	2124.05	1.08		3
			K.FMPDTGK.I	850.426	1.12		2
			K.GEEAITVRPGSLLPAEDFDEIAK.Y	2513.31	0.84		2
			K.GEEAITVRPGSLLPAEDFDEIAK.Y	2513.31	0.84		3
			K.GMIGQPEGGIPK.D	1238.67	1.38		2
			K.GPIDAYLDMDGIIDLAK.R	1875.97	0.66		2
			K.GPIDAYLDMDGIIDLAK.R	1875.97	0.57		3
			K.IIEYAPAFSLDDK.V	1536.81	0.92		2
			K.IIEYAPAFSLDDKVR.K	1792.98	1.08		3
			K.IMVKEEDEVK.A	1302.71	0.95		2
			K.IMVKEEDEVK.A	1302.71	1		3
			K.INNVEKADMNDPLQIGASIPGK.V	2408.28	1.13		3
			K.IVEATMCYTGDILDK.T	1783.87	0.99		2
			K.IVEATMCYTGDILDKTK.T	2042.05	0.66		3
			K.KLLLTDTTMR.D	1246.73	1.2		3
			K.LDKDNIIEEGK.N	1356.75	0.9		2
			K.LDKDNIIEEGK.N	1356.75	0.9		3
			K.LESDVFFYGLNK.N	1486.77	1.43		2
			K.LLLTDTTMR.D	1090.61	1.15		2
			K.LLQFIGDVIVNDNACK.E	1875	0.72		2
			K.LLQFIGDVIVNDNACK.E	1875	0.76		3
			K.NEECEVEIEEGK.V	1519.67	1.08		2
			K.NLSFPDSVVDYCK.G	1598.77	0.83		2
			K.NYPDNVIEEFTK.E	1523.75	0.91		2
			K.QLLMIMK.-	931.56	1		2
			K.SQDDVEIR.G	988.482	1.57		2
			K.SVGIYSK.E	808.47	1.16		2
			K.TKYNLEYYIK.M	1417.79	0.89		2
			K.TKYNLEYYIK.M	1417.79	1.23		3
			K.VDAIHPGYGFLAENAEFAR.K	2105.04	0.97		3
			K.VKEDDMVEDK.Q	1290.64	0.89		2
			K.VKEDDMVEDK.Q	1290.64	0.92		3
			K.VMNMMGDK.I	980.449	1.2		2
			K.VVGDLAIFMTK.N	1248.72	1.08		2
			K.VYEDYIK.H	984.517	1.17		2
			K.YDINANIR.N	1005.52	1.27		2
			K.YKEANEVVGDIIK.V	1560.88	1.07		2
			K.YKEANEVVGDIIK.V	1560.88	1.4		3
			K.YNLEYYIK.M	1160.61	1		2
			R.DAHQSLLATR.I	1138.61	20		2
			R.DTGIDLFGYDELGK.Y	1597.79	1.12		2
			R.DTGIDLFGYDELGK.Y	1597.79	1.07		3
			R.GYSIQCR.I	910.433	0.97		2
			R.IFDSLNWVENMKPSINTALETGK.I	2691.4	1.28		3
			R.IVHREEDLELEYETACSESR.K	2493.15	2.15		3
			R.IVHREEDLELEYETACSESR.K	2493.15	2.22		4
			R.KAFGEDIIFIEK.Y	1492.85	0.84		2
			R.KAFGEDIIFIEK.Y	1492.85	0.91		3
			R.KEICEDAVK.L	1174.63	1.01		2
			R.KKVDAIHPGYGFLAENAEFAR.K	2417.29	0.81		3
			R.KKVDAIHPGYGFLAENAEFAR.K	2417.29	0.89		4
			R.LVEIGEVK.E	941.58	1.09		2
			R.LVEIGEVKENGFR.T	1544.86	0.51		3
			R.NVISYALYPK.V	1222.7	1.25		2
			R.QGIDVFR.I	861.471	1.21		2
			R.STEEAKEVANK.I	1288.69	1.29		2
			R.STEEAKEVANK.I	1288.69	1.36		3
			R.TFQGAINK.T	933.528	1.07		2
			R.TGSGFGIR.L	821.44	1.09		2
			R.TKADESYLIGEGK.G	1493.8	1.01		2
			R.TKADESYLIGEGK.G	1493.8	0.99		3
			K.ADM(15.995)NDPLQIGASIPGK.V	363.146	0		2
			K.ADM(15.995)NDPLQIGASIPGK.V	363.146	0		3
			K.CEENGITFIGPSSK.V	1593.77	0		2
			K.DLQEVVLK.G	998.601	0		2
			K.DLQEVVLKGEEAITVR.P	1855.05	0		2
			K.DLQEVVLKGEEAITVR.P	1855.05	0		3
			K.DM(15.995)SGLLKPYSAYTLVK.E	292.109	0		3
			K.DNIIEEGK.N	972.513	0		2
			K.EKPLFDALHDPR.M	1492.8	0		2
			K.FIDENPDLFEITESK.D	1852.92	0		3
			K.FIDENPDLFEITESKDR.G	2124.05	0		2
			K.GM(15.995)IGQPEGGIPK.D	234.104	0		2
			K.GMIGQPEGGIPK.D	1238.67	0		3
			K.GPIDAYLDM(15.995)DGIIDLAK.R	1021.48	0		2
			K.GPIDAYLDM(15.995)DGIIDLAK.R	1021.48	0		3
			K.HIEVQILGDNYGNIVHLYER.D	2410.25	0		4
			K.HLQHYNDISK.L	1309.68	0		2
			K.HLQHYNDISK.L	1309.68	0		3
			K.IIEYAPAFSLDDK.V	1536.81	0		3
			K.INNVEKADM(15.995)NDPLQIGASIPGK.V	1088.55	0		3
			K.IVEATM(15.995)CYTGDILDK.T	690.362	0		2
			K.IVEATM(15.995)CYTGDILDK.T	690.362	0		3
			K.IVEATMCYTGDILDK.T	1783.87	0		3
			K.IVEATMCYTGDILDKTK.T	2042.05	0		2
			K.KVDAIHPGYGFLAENAEFAR.K	2261.17	0		3
			K.KVDAIHPGYGFLAENAEFAR.K	2261.17	0		4
			K.LESDVFFYGLNK.N	1486.77	0		3
			K.LESDVFFYGLNKNEECEVEIEEGK.V	2961.4	0		3
			K.LREEIPSIM(15.995)FQM(15.995)LLR.A	1114.61	0		3
			K.LREEIPSIMFQM(15.995)LLR.A	1520.77	0		3
			K.LREEIPSIMFQMLLR.A	1904.05	0		3
			K.M(15.995)AQELESLGADIIAIK.D	177.082	0		2
			K.M(15.995)AQELESLGADIIAIK.D	177.082	0		3
			K.MAQELESLGADIIAIK.D	1756.96	0		2
			K.MAQELESLGADIIAIK.D	1756.96	0		3
			K.NKLDKDNIIEEGK.N	1626.92	0		2
			K.NKLDKDNIIEEGK.N	1626.92	0		3
			K.NKLDKDNIIEEGK.N	1626.92	0		4
			K.NLSFPDSVVDYCK.G	1598.77	0		3
			K.NTERDTGIDLFGYDELGK.Y	2099.03	0		3
			K.NYPDNVIEEFTK.E	1523.75	0		3
			K.TNVGFLVNVLNNPIFSNGK.C	2103.16	0		2
			K.VDAIHPGYGFLAENAEFAR.K	2105.04	0		2
			K.VKEDDMVEDKQLLMIMK.-	2177.16	0		3
			K.VKEDDMVEDKQLLMIMK.-	2177.16	0		4
			K.VVGDLAIFM(15.995)TK.N	991.541	0		2
			R.ACSELGIK.S	932.5	0		2
			R.DTGIDLFGYDELGKYYK.D	2081.04	0		3
			R.EEDLELEYETACSESR.K	1986.84	0		2
			R.IFDSLNWVENM(15.995)KPSINTALETGK.I	1394.65	0		3
			R.KCEENGITFIGPSSK.V	1749.9	0		2
			R.KCEENGITFIGPSSK.V	1749.9	0		3
			R.LDGGNGFTGANISPHYDSLLVK.T	2331.19	0		2
			R.LDGGNGFTGANISPHYDSLLVK.T	2331.19	0		3
			R.LVEIGEVKENGFR.T	1544.86	0		2
			R.TIGFELNGM(15.995)VR.E	1008.5	0		2
			R.TIGFELNGMVR.E	1263.66	0		2
WP_003421156.1	30S ribosomal protein S17	30S			1.09	0.1	2
			K.TIVVAVEEFVR.H	1288.74	1.02		2
			R.LVEVVEK.V	870.543	1.16		2
			K.NICNIGDR.V	988.476	0		2
WP_003421168.1	50S ribosomal protein L2	50S			1.09	0.1	234
			K.ATIGQVGNIEHGNVVIGK.A	1862.05	1.08		2
			K.ATIGQVGNIEHGNVVIGK.A	1862.05	1.09		3
			K.VATIEYDPNR.T	1204.61	1.03		2
			R.GSVMNPNDHPHGGGEGR.S	1744.77	1.16		3
			R.GSVMNPNDHPHGGGEGR.S	1744.77	1.22		4
			R.QMTVLVSDEITCNQPEK.S	2048	0.95		3
			R.SAGVSAQLMAK.E	1117.62	1.19		2
			R.TANIALLNYADGEK.R	1547.82	0.93		2
			R.TANIALLNYADGEKR.Y	1703.92	1.18		2
			R.TANIALLNYADGEKR.Y	1703.92	1.09		3
			K.DMPVGTIIHNIELKPGK.G	1946.11	0		3
			K.DMPVGTIIHNIELKPGK.G	1946.11	0		4
			R.GSVMNPNDHPHGGGEGR.S	1744.77	0		2
			R.QMTVLVSDEITCNQPEK.S	2048	0		2
			R.SAGVSAQLM(15.995)AK.E	890.453	0		2
WP_003421160.1	50S ribosomal protein L16	50S			1.14	0.11	23
			K.GSPEYWVAVVKPGR.V	1599.88	1.21		3
			R.VMFELAGVSEDK.A	1379.7	1.06		2
WP_009890455.1	peptidylprolyl isomerase	peptidylprolyl			1.15	0	3
			K.LVESDYGYHIIK.K	1491.8	1.15		3
			K.AQAGEDFATLAK.K	1276.67	0		2
			K.GQMVESFEK.A	1109.54	0		2
WP_003436176.1	30S ribosomal protein S12	30S			1.16	13.32	23
			R.GTLDTAGVDKR.R	1187.65	1.16		2
			R.GTLDTAGVDKR.R	1187.65	20		3
WP_003436863.1	NADP-dependent glyceraldehyde-3-phosphate dehydrogenase	NADP-dependent			1.18	0.31	23
			K.IAWEEPFGPVLPIIR.V	1765	0.96		2
			R.KPIEIYSPIDNSLVGK.V	1857.07	1.4		3
			K.DAAIVLEDADLDFAAK.N	1731.89	0		2
			K.NIVSGAYSYSGQR.C	1428.7	0		2
			K.NMEGEAISGDNFPGGTR.N	1778.79	0		2
			R.GSEIGDYVVTHK.G	1359.7	0		3
WP_009903695.1	ferrous iron transport protein B	ferrous			1.2	0	3
			K.VVDLPGIYAMDTFSNEEK.V	2084.02	1.2		3
			K.NFGSETETYK.K	1230.58	0		2
			K.TEAEPFILELPEYR.I	1733.89	0		2
WP_009901692.1	chaperonin GroEL	chaperonin			1.21	0.07	23
			K.ALEEPLR.Q	854.486	1.08		2
			K.AVTVAVEELK.N	1113.66	1.24		2
			K.EADLSMLGR.A	1018.51	1.29		2
			K.ESTTIVDGSGDKK.A	1419.75	1.2		3
			K.LIAEAMEIVGK.D	1228.71	1.27		2
			K.TNDVAGDGTTTATILAQAIIR.E	2130.14	1.21		3
			R.ALEAGVNK.L	856.502	1.19		2
			K.EIELEDRFENMGAQLVK.E	2077.06	0		3
			K.FGSPLITNDGVTIAK.E	1587.89	0		2
			K.HQVEQTTSDFDR.E	1489.68	0		2
			K.HQVEQTTSDFDREK.L	1774.85	0		3
			K.LAGGVAVVK.V	868.575	0		2
			K.NVTAGANPILLR.K	1265.75	0		2
			K.TNDVAGDGTTTATILAQAIIR.E	2130.14	0		2
			K.VGAATEVELK.E	1071.62	0		2
			K.YVNMIEAGIVDPTK.V	1604.85	0		2
			R.IEDALNATR.A	1029.55	0		2
			R.IVETQEAISQVASISAGDEEVGK.L	2416.24	0		2
WP_009898069.1	bifunctional acetaldehyde-CoA/alcohol dehydrogenase	bifunctional			1.24	0.37	23
			K.AVTDLLDEMNIK.H	1416.75	0.98		2
			K.DMYLNSYYGR.-	1308.58	2.07		2
			K.ETGMGIAEDK.V	1105.53	1.45		2
			K.EVDLTLATGGPGMVK.S	1542.83	2.51		2
			K.FQSLLVAIEDLK.L	1430.84	1.31		2
			K.GNSDEEKFQSLLVAIEDLK.L	2219.18	1.54		3
			K.HTTFFEVEPDPTLECAK.I	2076.99	1.59		2
			K.IAEPIGVIAAVVPTTNPTSTAIFK.A	2466.42	1.22		2
			K.IAEPIGVIAAVVPTTNPTSTAIFK.A	2466.42	1.16		3
			K.IFATYSQEQVDK.I	1483.76	1.12		2
			K.IFLAASLAANK.Q	1173.71	1.15		2
			K.IMWTLYEHPDVDFQDLAMR.F	2408.14	1.18		3
			K.IVGQTACTIAK.L	1216.68	1.17		2
			K.KENEVMSVGLDTVNNVESLVK.K	2388.27	1.22		3
			K.LAGFEVPVDTK.V	1230.69	1.2		2
			K.LAPSLTLGCGSWGGNSVSENVGVK.H	2445.24	1.05		3
			K.LVEDGGFGHTSSLYIDDVNQR.E	2350.13	1.25		2
			K.LVEDGGFGHTSSLYIDDVNQR.E	2350.13	1.03		3
			K.SAYSSGKPAIGVGAGNTPAIIDDSADIK.T	2759.44	1.35		3
			K.SIFEYLPR.A	1051.57	1.63		2
			K.TAVNSILVSK.T	1086.66	1.23		2
			K.TCGVIEKDEAFGMTK.I	1768.87	1.37		2
			K.TCGVIEKDEAFGMTK.I	1768.87	1.29		3
			K.VLIGEVESVEIEEAFAHEK.L	2184.14	0.94		3
			R.EFNPDVIISIGGGSAMDAGK.I	2034.02	1.34		2
			R.ILINTPSSQGGIGDLYNFK.L	2093.12	2.24		2
			R.ILINTPSSQGGIGDLYNFK.L	2093.12	1.01		3
			R.YAEIASFLGLK.G	1266.72	1.35		2
			K.ANFVAIPTSAGTGSEVTPFAVITDQDTGVK.Y	3049.57	0		3
			K.ASDFDDAVR.K	1022.47	0		2
			K.AVTDLLDEM(15.995)NIK.H	1033.5	0		2
			K.ETGM(15.995)GIAEDK.V	464.194	0		2
			K.EVDLTLATGGPGM(15.995)VK.S	1287.64	0		2
			K.FM(15.995)DSIDEMVIQAFDDQCTGANPR.Y	324.151	0		3
			K.FNSSDAPK.K	920.46	0		2
			K.HTTFFEVEPDPTLECAK.I	2076.99	0		3
			K.IAEPIGVIAAVVPTTNPTSTAIFK.A	2466.42	0		4
			K.IFATYSQEQVDK.I	1483.76	0		3
			K.IM(15.995)WTLYEHPDVDFQDLAMR.F	290.166	0		3
			K.KMGAFSQYK.Y	1142.62	0		2
			K.LAPSLTLGCGSWGGNSVSENVGVK.H	2445.24	0		2
			K.NHYASEYIYNAYK.E	1690.8	0		2
			K.NHYASEYIYNAYK.E	1690.8	0		3
			K.SIKEFGVEESK.F	1335.73	0		2
			R.AFIVTDTFLYNNGYTK.A	1922.99	0		2
			R.AFIVTDTFLYNNGYTK.A	1922.99	0		3
			R.EFNPDVIISIGGGSAMDAGK.I	2034.02	0		3
			R.GAYLLDKDETEK.I	1464.77	0		2
			R.GAYLLDKDETEK.I	1464.77	0		3
			R.NGIIFSPHPR.A	1164.64	0		2
WP_003422104.1	D-proline reductase (dithiol) proprotein PrdA	D-proline			1.25	4.86	23
			K.EANETQELVVDMK.L	1560.77	1.3		2
			K.IVLEENEQSLPMSK.K	1671.88	1.12		2
			K.IVLEENEQSLPMSK.K	1671.88	1.25		3
			K.LNNIEAIEK.V	1098.63	1.35		2
			K.NAIEGVEVK.A	1013.58	1.06		2
			K.QGIENEILSNNTLAPEDAVR.I	2211.12	0.92		2
			K.QGIENEILSNNTLAPEDAVR.I	2211.12	0.92		3
			K.SKQGIENEILSNNTLAPEDAVR.I	2454.28	1.2		3
			K.YMTHMVDNNK.S	1307.6	1.53		2
			K.YMTHMVDNNK.S	1307.6	1.51		3
			R.AFDYVTQEIR.E	1268.64	20		2
			R.AMEDEEIDLVGVVFVGSPQVNAEK.F	2631.32	1.01		2
			R.AMEDEEIDLVGVVFVGSPQVNAEK.F	2631.32	1.04		3
			R.GIPVVGVSFSAVQGALVVGNK.Y	2054.2	1.33		2
			R.GIPVVGVSFSAVQGALVVGNK.Y	2054.2	1.36		3
			K.AGEAKEEVVEETVEEAAPVSEAAVVPVSTGVAGETVK.I	3752.94	0		3
			K.AGEAKEEVVEETVEEAAPVSEAAVVPVSTGVAGETVK.I	3752.94	0		4
			K.IDKVEFADETK.I	1377.74	0		2
			K.IDKVEFADETK.I	1377.74	0		3
			K.IVLEENEQSLPM(15.995)SK.K	1428.72	0		2
			K.IVLEENEQSLPM(15.995)SK.K	1428.72	0		3
			K.LKETLDALSPMTTDNVEGYK.A	2309.19	0		2
			K.LKETLDALSPMTTDNVEGYK.A	2309.19	0		3
			K.YMTHM(15.995)VDNNK.S	709.293	0		2
			R.AM(15.995)EDEEIDLVGVVFVGSPQVNAEK.F	248.119	0		2
			R.AM(15.995)EDEEIDLVGVVFVGSPQVNAEK.F	248.119	0		3
WP_009903223.1	leucine--tRNA ligase	leucine--tRNA			1.25	0	2
			R.LFVLFAAPPER.D	1286.74	1.25		2
			K.SMGMVDFNEPFK.N	1456.67	0		2
			K.YNLDIIDVITEDNK.M	1719.89	0		2
			R.LVDELADVVK.K	1155.68	0		2
			R.LVDELADVVKK.D	1311.8	0		3
WP_003430159.1	NifB/NifX family molybdenum-iron cluster-binding protein	NifB/NifX			1.26	0.33	234
			K.ALSGTAVDAVVVGGIGQGAIIK.L	2052.2	1.23		2
			K.ALSGTAVDAVVVGGIGQGAIIK.L	2052.2	1.35		3
			K.GLDSKPYGHFGSAPIFVVCDLESGEVK.S	2992.51	1.05		4
			K.SLDNGDLDHEHGK.C	1491.7	2		3
			K.VCIPVEENK.G	1142.6	1.19		2
			R.AEGDTISANLDLLK.N	1514.82	1.29		2
			K.GLDSKPYGHFGSAPIFVVCDLESGEVK.S	2992.51	0		3
			K.SLDNGDLDHEHGK.C	1491.7	0		2
WP_009888019.1	anaerobic carbon-monoxide dehydrogenase catalytic subunit	anaerobic			1.28	0.26	23
			K.ELGIMPGGAK.S	1027.57	1.08		2
			K.GVAAVVGCSNMTAGGHDVNTVELTK.E	2543.26	1.38		3
			K.LVTEVLTEK.L	1086.65	1.66		2
			K.MVCLDDVAK.K	1105.55	1.67		2
			R.GICGADADTIVAR.N	1345.67	1.18		2
			R.SKLDELSNTLIEK.A	1572.9	1.13		3
			K.LVGCTCVGQDLQLR.G	1645.83	0		2
			R.AVASGAACYLHVVENTAK.N	1916.99	0		3
WP_003420072.1	NADPH-dependent glutamate synthase	NADPH-dependent			1.29	0.12	23
			K.IKEDDIEGAAK.V	1271.7	1.2		3
			K.VAVVGGGNVAMDAAR.T	1413.74	1.37		2
			K.EGVFAGGDAVTGAATVISAMGAGK.T	2193.12	0		3
			R.ATNFDEVCLGYNKEEAMAEANR.C	2588.17	0		3
WP_003428343.1	hypothetical protein	hypothetical			1.29	13.23	2
			K.GLAEGLEISAESK.E	1358.73	1.29		2
			K.HLYEEVAYLK.G	1319.71	20		2
WP_003436882.1	aminoacyl-histidine dipeptidase	aminoacyl-histidine			1.29	0.56	23
			K.GISDFLLSFGK.N	1238.69	1.32		2
			K.HEFTTSDPGMTYSVAETSVDK.V	2358.08	2.34		3
			R.VLSVLNVDYELASVDGGTK.H	2035.09	1.25		2
			R.VLSVLNVDYELASVDGGTK.H	2035.09	1.11		3
			K.GYENCPGVVLQGHMDMVCEK.E	2379.06	0		3
			K.HEFTTSDPGM(15.995)TYSVAETSVDK.V	1148.48	0		3
			K.HEFTTSDPGMTYSVAETSVDK.V	2358.08	0		2
			K.NVEHDFLKDPIK.L	1537.85	0		3
			K.QINDILTAFK.H	1217.7	0		2
			R.LLAQALGANYDLIAQYPAWEFK.K	2551.36	0		3
			R.LLAQALGANYDLIAQYPAWEFKK.G	2707.48	0		3
WP_003435562.1	serine--tRNA ligase	serine--tRNA			1.3	0	3
			R.IPNVPHPEVPQGETDEDNVQIR.T	2511.24	1.3		3
			R.YVEISSCSNFEDFQAR.R	1979.88	0		2
WP_003435635.1	glucose-6-phosphate isomerase	glucose-6-phosphate			1.3	0.23	23
			K.TGLGNTFLGWIDLPK.N	1686.93	1.15		2
			R.AAIDMVSHSFR.N	1260.63	1.61		3
			R.EAFQNPDLK.S	1116.58	1.3		2
			K.NMFALLGKPGYEK.E	1550.85	0		3
			K.SGTTTEPALAFR.I	1277.66	0		2
			R.AAIDMVSHSFR.N	1260.63	0		2
			R.NITISSEEVDLDGLNYLAGK.T	2207.14	0		2
			R.QLATEEGYETFVIPDDVGGR.F	2224.07	0		2
WP_003438306.1	translation initiation factor IF-2	translation			1.3	0.62	23
			K.ADVQGSVQAVK.Q	1156.65	0.97		2
			R.AVGTVIEAELDKGR.G	1512.85	2.17		3
			R.TYTIIYK.A	956.558	1.3		2
			K.ISGVGTVAGCYVTNGK.I	1637.84	0		2
			K.TAGPSTAVEILGLSEVPQGGDQFVEVPTDK.I	3097.59	0		3
			K.TSLLDAIR.K	915.539	0		2
			K.VKQELADQGLLVEDWGGEVIAVPVSAK.K	2934.61	0		3
			R.KTDVISGEAGGITQHIGASEVK.I	2281.24	0		3
contaminant_KERATIN13	no description	no			1.3	0.38	23
			K.AEAESLYQSK.Y	1180.6	1.12		2
			K.NMQDMVEDYR.N	1327.55	1.81		2
			K.QISNLQQSISDAEQR.G	1743.88	1.56		2
			K.QISNLQQSISDAEQR.G	1743.88	1.6		3
			K.SKAEAESLYQSK.Y	1423.76	1.3		2
			K.SKAEAESLYQSK.Y	1423.76	1.3		3
			K.SLNNQFASFIDK.V	1438.75	0.96		2
			K.YEELQITAGR.H	1206.62	1.05		2
			R.FLEQQNQVLQTK.W	1530.84	1.5		2
			R.GGGGGGYGSGGSSYGSGGGSYGSGGGGGGGR.G	2411.98	0.37		2
			R.LRSEIDNVKK.Q	1284.78	1.62		3
			R.NKYEDEINKR.T	1391.74	1.36		3
			R.THNLEPYFESFINNLR.R	2022	0.99		3
			R.TLLEGEESR.M	1060.54	0.75		2
			R.TNAENEFVTIK.K	1320.69	1.09		2
			K.DVDGAYMTK.V	1054.5	0		2
			K.KQISNLQQSISDAEQR.G	1900	0		3
			K.LNDLEDALQQAK.E	1412.75	0		2
			K.NKLNDLEDALQQAK.E	1682.92	0		2
			K.SLNNQFASFIDKVR.F	1693.92	0		3
			R.DYQELMNTK.L	1196.57	0		2
			R.FLEQQNQVLQTKWELLQQVDTSTR.T	2988.57	0		3
			R.GSYGSGGGSYGSGGSSYGSGGGGGGHGSYGSGSSSGGYR.G	3340.34	0		3
			R.GSYGSGGGSYGSGGSSYGSGGGGGGHGSYGSGSSSGGYRGGSGGGGGGSSGGR.G	4328.75	0		4
			R.TNAENEFVTIKK.D	1476.82	0		2
			R.TNAENEFVTIKK.D	1476.82	0		3
WP_003427733.1	DNA-directed RNA polymerase subunit alpha	DNA-directed			1.31	0.38	2
			K.DLAIATLDDNAK.L	1314.7	1.85		2
			K.ELSATIDGEGSR.T	1261.62	1.83		2
			K.LEELGLGLKPSEE.-	1468.8	1.06		2
			K.VDIVELSEDYR.Y	1364.68	1.15		2
			R.AGINTVEELANK.S	1313.72	1		2
			R.GYGITIGNALR.R	1161.65	1.47		2
			R.AGINTVEELANKSEDDMMK.V	2179.06	0		3
			R.GYVSAEENKTENVPIGVLPVDSIYTPVEK.V	3231.7	0		3
			R.ILLSSLPGVAVNAIK.I	1549.98	0		2
WP_003430157.1	NAD(P)/FAD-dependent oxidoreductase	NAD(P)/FAD-dependent			1.32	0	2
			R.GVGYCATCDAPLYR.N	1629.73	1.32		2
			K.APSIDNYLGFYDISGDELKDK.F	2444.22	0		3
			K.VAVIGYNEESKEEANFLSELTSK.T	2641.36	0		3
WP_025992040.1	2,3-bisphosphoglycerate-independent phosphoglycerate mutase	2,3-bisphosphoglycerate-independent			1.32	0.21	24
			K.VYVHAFTDGRDTDPQSALEYAK.E	2539.24	1.17		4
			R.LLIPSPK.V	822.558	1.47		2
			K.AVETVDTCVGK.L	1233.63	0		2
			K.TVTAHSINPVPFIVVGQEYESAK.L	2542.35	0		3
			K.VATYDLKPEMSAYELTDK.A	2158.09	0		3
			K.VLCEAMDNAK.E	1205.58	0		2
			R.DTDPQSALEYAK.E	1392.68	0		2
WP_003432446.1	glutamine--fructose-6-phosphate transaminase (isomerizing)	glutamine--fructose-6-phosphate			1.34	5.92	234
			K.AAEVIVEGLSK.L	1170.69	1.25		2
			K.EIHEQPTGVR.E	1192.62	20		3
			K.FVNIPVITDIASEFR.Y	1748.95	1.44		2
			K.GTPVIAIATQEK.L	1282.75	1.42		2
			K.IQEILDNEEYIK.E	1561.82	1.48		2
			K.TVVSSEHAFYLGR.G	1492.77	1.43		3
			R.GYDSAGVAVNSSNEK.E	1552.74	1.08		2
			R.ILSITNVVGSSIAR.E	1456.86	1.2		2
			R.KAAEVIVEGLSK.L	1326.81	1.23		2
			R.LSVLAEDLEKNPIDGNLGIGHTR.W	2517.36	1.17		4
			K.EVFHVTWDVEAASK.G	1672.85	0		3
			K.GGYDYFMSK.E	1122.51	0		2
			K.HGTIALIEK.G	1036.63	0		2
			K.IQEILDNEEYIKEVAK.T	2018.1	0		3
			K.TVVSSEHAFYLGR.G	1492.77	0		2
			R.ESDDVFYTWAGPEVAVASTK.A	2228.07	0		2
			R.GAYALGVICK.E	1106.62	0		2
			R.GAYVVAIAQSHNK.D	1412.78	0		3
			R.GIDYSLAM(15.995)EGSLK.L	896.431	0		2
			R.GIDYSLAMEGSLK.L	1438.74	0		2
WP_009902717.1	radical SAM protein	radical			1.34	0.21	2
			K.IGVETFDNYFR.N	1387.68	1.48		2
			R.EYFEIPVVFK.I	1325.73	1.19		2
			K.ATVNVFINNSSSIK.R	1548.85	0		2
WP_003421117.1	50S ribosomal protein L17	50S			1.35	0	2
			R.KGDAAEMAFIELV.-	1448.76	1.35		2
			R.NLVTCLLR.S	1015.58	0		2
WP_003421448.1	ribose-phosphate pyrophosphokinase	ribose-phosphate			1.35	0.4	2
			K.LVANLITAAGADR.V	1311.75	1.07		2
			K.TVAPLFGDAIR.M	1186.67	1.63		2
			K.DVYACCTHGVLSGPAIER.I	2032.95	0		3
			K.FANTLNGEVPIAIIDKR.R	1927.1	0		3
			R.MIFSNESVSK.L	1196.61	0		2
WP_004454390.1	2-hydroxyacyl-CoA dehydratase	2-hydroxyacyl-CoA			1.35	0.01	2
			K.NKPFMSLETDYSK.S	1642.83	1.34		2
			R.ILITGSPIGGISEK.I	1439.86	1.36		2
			K.SLGVTITEEDIR.T	1359.72	0		2
			K.VKPTYVMHLPNTSK.G	1697.95	0		3
			K.VKPTYVMHLPNTSK.G	1697.95	0		4
			K.YINIGCSCMMNNDNR.I	1888.77	0		2
			R.YEKGECPVQK.D	1320.67	0		3
WP_009901787.1	putative manganese-dependent inorganic diphosphatase	putative			1.35	0.12	23
			K.QLVPNLTTAIK.N	1252.78	1.2		2
			K.VVPLTPTSSILEAYNLMDEK.N	2276.21	1.44		2
			K.VVPLTPTSSILEAYNLMDEK.N	2276.21	1.35		3
			K.ATAYALGDIR.K	1077.58	0		2
			K.EGSYLIYK.A	1027.56	0		2
			K.INGVSVVSVESDNYK.T	1664.86	0		2
			K.NPDTDSICSAISLAHLK.N	1897.96	0		3
			K.TLPVTYDDGTFAGIITMK.E	1999.04	0		2
			K.YAMDMFK.C	960.445	0		2
WP_009903754.1	porphobilinogen synthase	porphobilinogen			1.35	0.71	2
			K.AGADMVAPSDMMDGR.I	1550.65	2.52		2
			R.AGADIIITYFAK.D	1337.76	1.25		2
			R.EAAHSAPSFGDR.K	1271.59	1.35		2
			K.EGLLNEDVILESITSIKR.A	2085.18	0		3
			R.VKDNFDLPLAAYNVSGEYSMLK.F	2558.32	0		3
WP_003419350.1	50S ribosomal protein L19	50S			1.36	0.19	2
			K.MSFNVGVER.T	1065.53	1.59		2
			R.AIEQEQLK.N	1013.58	1.36		2
			R.IQVFEGVVLK.R	1186.73	1.21		2
			R.AIEQEQLKNEVPNFGPGDTVK.V	2397.26	0		3
WP_003438808.1	4-hydroxy-tetrahydrodipicolinate reductase	4-hydroxy-tetrahydrodipicolinate			1.36	0	2
			R.GIFASGSIAAAK.Y	1147.66	1.36		2
			K.EVLPNVENNYGR.Y	1430.72	0		2
WP_009887752.1	YbaB/EbfC family nucleoid-associated protein	YbaB/EbfC			1.36	0	2
			K.EVEASVGGGAVTVK.V	1357.75	1.36		2
WP_003438316.1	polyribonucleotide nucleotidyltransferase	polyribonucleotide			1.37	0.05	23
			R.ALLPVIPSQEEFPYAIR.L	1971.09	1.33		2
			R.ALLPVIPSQEEFPYAIR.L	1971.09	1.43		3
			R.DGIDFFPLSVDYEEK.L	1829.88	1.37		2
			K.MPVELYHAGEEITQLVR.E	2013.04	0		3
			K.TISQPKPELSPYAPK.I	1738.99	0		3
			R.EIGHGALAER.A	1079.57	0		2
WP_009889131.1	peptidylprolyl isomerase	peptidylprolyl			1.37	0.18	23
			K.EITNIDIENALK.S	1427.79	1.35		2
			K.GEVSEPVK.T	899.496	1.45		2
			K.KIEENVLK.Q	1055.66	1.35		2
			K.LEDLQESTESTFDEVK.A	1925.92	1.34		2
			K.SLDPYQAMQFK.T	1382.69	1.87		2
			K.SLLYQK.Q	806.49	1.57		2
			K.SSFSKPESATAK.H	1322.71	1.68		2
			K.TQFGYHIIK.L	1161.65	1.37		2
			K.VLATVGEK.E	871.538	1.37		2
			K.VLSSVNVTEDEK.V	1374.72	1.35		2
			R.GQMVPEFEEAVFSMAK.G	1855.89	1.68		2
			R.GQMVPEFEEAVFSMAK.G	1855.89	1.33		3
			K.DMGGDLGTFGR.G	1152.52	0		2
			K.EILAQIK.S	869.559	0		2
			K.HILVDSDEK.A	1110.59	0		2
			K.HILVDSDEKAK.E	1337.76	0		3
			K.LEDLQESTESTFDEVK.A	1925.92	0		3
			K.LEDLQESTESTFDEVKAEVEK.S	2510.24	0		3
			K.SEEISFEDAALK.H	1393.7	0		2
			K.SLDPYQAM(15.995)QFK.T	951.437	0		2
			K.VLATVGEKEITNIDIENALK.S	2254.29	0		3
			K.VLSSVNVTEDEKVK.F	1629.92	0		3
			R.GQM(15.995)VPEFEEAVFSM(15.995)AK.G	362.162	0		3
			R.GQM(15.995)VPEFEEAVFSMAK.G	362.162	0		2
WP_009903017.1	threonine synthase	threonine			1.37	13.17	2
			K.NLASFYGEYSNEEEVK.S	1934.9	20		2
			K.VTASQAIIK.G	985.617	1.37		2
			K.IIVFFPEDGVSPVQK.L	1730.97	0		2
			K.IIVFFPEDGVSPVQK.L	1730.97	0		3
WP_003428740.1	acetyl-CoA carboxylase biotin carboxyl carrier protein	acetyl-CoA			1.38	0.26	23
			-.MNINEIK.E	916.505	1.27		2
			-.MNINEIKELLK.A	1427.84	1.54		2
			-.MNINEIKELLK.A	1427.84	1.54		3
			K.AIDSTNLEYVK.L	1307.7	1.2		2
			K.GEIIEVLVSNEELVEYNQPLFK.I	2618.39	0.86		3
			K.LESSDLR.L	846.445	1.08		2
			K.LESSDLRLEVSK.K	1430.8	1.48		2
			K.LESSDLRLEVSK.K	1430.8	1.55		3
			K.AIDSTNLEYVKLESSDLR.L	2109.1	0		3
			L.M(15.995)GTFYDSPSPDADSFVK.V	177.082	0		2
			L.MGTFYDSPSPDADSFVK.V	1919.87	0		2
WP_003429565.1	phosphoglycerate kinase	phosphoglycerate			1.38	0.07	23
			K.ELPGIAALDNK.-	1195.68	1.37		2
			K.EVVFAADDNVVGENAK.K	1731.87	1.38		2
			K.GEAKPELSLAPVAK.R	1492.89	1.49		3
			K.FLGEAVANPVRPFTAILGGAK.V	2184.25	0		3
			K.MTHVSTGGGASLEFLEGK.E	1876.94	0		3
			K.VDNLIIGGGMAYTFLK.A	1767.97	0		2
WP_009903330.1	M60 family metallopeptidase	M60			1.38	0.65	2
			K.VSASFSDGIQSGSLVK.S	1636.87	1.33		2
			R.ALSSSDPINNLPK.D	1410.77	0.46		2
			R.ATLTDVTTVNQEINK.L	1701.91	1.5		2
			R.FVSDTMYVPVGAK.N	1468.76	2.3		2
			R.GPIITFDK.S	945.553	1.38		2
			K.DSGTVNVGTDNIEYTIK.K	1880.94	0		2
			K.GEPYYPGTNVGNSYGYSEK.T	2137.97	0		2
			K.GIVEVTDKDGNVQQIPYENK.E	2330.22	0		3
			K.GNADLNTQVDR.L	1229.6	0		2
			K.LIYTQYYGESGAYK.S	1710.85	0		2
			K.NTSTTYNPLTNYK.I	1571.78	0		2
			K.SYTMDTFMATPR.F	1447.65	0		2
			K.TISGEALLFAEVPEKGELGEISK.G	2501.37	0		3
			R.AGDEITVYVGSK.S	1293.68	0		2
			R.FVSDTMYVPVGAK.N	1468.76	0		3
			R.MTATNHLGTSGMSK.T	1490.72	0		3
			R.SYGNYLDGENGTQVK.Y	1699.81	0		2
			R.YNDLQGDTPVGQR.F	1489.72	0		2
WP_011861888.1	D-proline reductase (dithiol) protein PrdB	D-proline			1.38	0.8	23
			K.IVPLPYEYK.A	1176.68	1.38		2
			R.AIEEAGIPTIIIAALPPVVR.Q	2071.25	1.02		2
			R.AIEEAGIPTIIIAALPPVVR.Q	2071.25	1.29		3
			R.DTLEQLVAIPSAGK.I	1496.85	1.38		2
			R.LHELAAEGFIK.G	1282.73	3.23		3
			R.TAVIVQR.A	813.507	1.55		2
			R.AVAPLVPMGANAGEPHNIEMQTHILR.D	2794.45	0		4
			R.FNLAGDTTFR.A	1168.59	0		2
			R.LHELAAEGFIK.G	1282.73	0		2
WP_003418888.1	acyl-CoA dehydrogenase	acyl-CoA			1.39	0.09	2
			K.GTPGFSFGVK.E	1051.57	1.55		2
			K.ITEIYEGTSEVQR.M	1551.78	1.39		2
			R.GSATSELIFEDCR.I	1511.69	1.39		2
			K.AVQLHGGYGYTR.D	1348.69	0		3
			K.FQNTQFQLADMEVK.V	1753.87	0		2
			K.GISAFIVEK.G	1018.61	0		2
			K.LFAAETAMEVTTK.A	1466.77	0		2
			K.LGAFGLTEPNAGTDASGQQTTAVLDGDEYILNGSK.I	3567.75	0		3
WP_003421190.1	transcription termination/antitermination factor NusG	transcription			1.4	0	2
			R.QVVVPTEEVVETTK.T	1612.89	1.4		2
			K.GVTGFVGPGSKPVPLSEDEVK.A	2183.19	0		3
			K.VSQGPFSGQIGNIEEIDLENR.E	2330.16	0		2
WP_003422061.1	aspartate-semialdehyde dehydrogenase	aspartate-semialdehyde			1.4	0	2
			R.VVYSTYQAVSGSGVK.G	1599.85	1.4		2
			K.ILDNYDLK.I	1048.58	0		2
WP_003427760.1	electron transfer flavoprotein subunit beta/FixA family pro	electron			1.4	0.16	23
			K.LDIPQVTYVQDFK.I	1620.88	1.38		2
			K.QVPDTNEVR.I	1084.55	1.41		2
			K.VGDYDIIFAGR.Q	1252.65	1.74		2
			K.VSTPVLLTAVK.E	1182.76	1.44		2
			K.VWTIDDLDVNKEEVGLK.A	2057.11	1.49		3
			R.AFGGADTWATSNTIAAGISK.V	1995.01	1.35		2
			R.DGVPSILNPDDANALEEALK.I	2137.1	1.4		2
			R.DGVPSILNPDDANALEEALK.I	2137.1	1.22		3
			R.ECLAMGADDAILLSDR.A	1776.84	1.8		2
			R.GKGEILEGK.A	1013.61	1.33		2
			R.QAIDGDTAQVGPQIAEK.L	1795.93	1.49		2
			R.QAIDGDTAQVGPQIAEK.L	1795.93	1.36		3
			R.QLEDGYELIK.V	1262.68	1.39		2
			K.LDIPQVTYVQDFK.I	1620.88	0		3
			K.VWTIDDLDVNKEEVGLK.A	2057.11	0		2
			R.AFGGADTWATSNTIAAGISK.V	1995.01	0		3
			R.ECLAM(15.995)GADDAILLSDR.A	650.277	0		2
			R.ECLAMGADDAILLSDR.A	1776.84	0		3
WP_003428486.1	RnfABCDGE type electron transport complex subunit B	RnfABCDGE			1.4	0	3
			K.GIIITKPESQEVVVECNSK.E	2214.2	1.4		3
WP_003431407.1	D-2-hydroxyacid dehydrogenase	D-2-hydroxyacid			1.4	0.41	23
			K.ILVFGAR.D	802.506	1.43		2
			K.MNPGELTDPEINK.L	1512.75	2.4		2
			R.AAALDTFETEGLFLNK.K	1795.94	1.1		2
			R.AAALDTFETEGLFLNK.K	1795.94	1.23		3
			R.AAALDTFETEGLFLNKK.M	1952.07	1.26		3
			R.GGLINTGDLIEALESGK.I	1741.95	1.52		2
			R.GGLINTGDLIEALESGK.I	1741.95	1.38		3
			R.SITVGVIGTGK.I	1086.66	1.75		2
			K.DTLAIMK.D	846.489	0		2
			K.EADLITLHTPLLEGTK.H	1807.02	0		3
			K.GLGANVIAFDQYPNSDLNDILTYK.D	2697.37	0		2
			K.GLGANVIAFDQYPNSDLNDILTYK.D	2697.37	0		3
			K.GYDGISIQQTNYIDNPYIYETLK.D	2764.37	0		2
			K.GYDGISIQQTNYIDNPYIYETLK.D	2764.37	0		3
			K.M(15.995)NPGELTDPEINK.L	177.082	0		2
			K.WSEEHKDVQVDIYPENMTEENVVK.A	3002.44	0		4
			R.AAALDTFETEGLFLNKK.M	1952.07	0		2
			R.DYEEPVIK.K	1047.55	0		2
			R.DYEEPVIKK.W	1203.68	0		2
			R.WIAELLGTEVR.S	1313.73	0		2
WP_003431873.1	proline reductase-associated electron transfer protein Prd	proline			1.4	0.22	23
			K.EAGVVGMGGAGFPTHVK.L	1668.87	1.52		3
			K.EIEERPEIVYQGIK.Y	1757.96	1.43		3
			K.LLEPTQLPSEANAVVINVETLTR.I	2535.4	1.02		3
			K.MGVTDIVSVQK.C	1231.68	1.36		2
			K.EAGVVGMGGAGFPTHVK.L	1668.87	0		2
			K.MGLLVCACGPNEER.M	1632.74	0		2
			K.NITVVGQLNSGK.E	1284.74	0		2
			K.VIKPGDNIEVAELVDMYPMGEER.A	2660.33	0		3
WP_003435581.1	glutamate--tRNA ligase	glutamate--tRNA			1.4	0	2
			K.AGIPYVIR.L	915.554	1.4		2
			K.TEVLNAEFVQAMLK.E	1647.89	0		2
			R.FAPSPTGFVHIGSLR.T	1612.87	0		3
WP_004454042.1	serine dehydratase subunit alpha family protein	serine			1.4	5.62	23
			K.AESLMDTVTIQELIK.N	1745.95	1		2
			K.AKELLGEEIVENR.M	1554.86	1.47		2
			K.AKELLGEEIVENR.M	1554.86	1.25		3
			K.ALAISHLVTGYIK.N	1440.87	1.29		3
			K.DGEVLLDNEPK.V	1283.66	1.52		2
			K.ELLGEEIVENR.M	1327.7	1.36		2
			K.IAEDYMDNTPLSITPADTR.E	2151.02	1.82		3
			K.KFPQSDER.L	1061.55	1.54		2
			K.TGIGVGYGIK.K	1019.6	1.4		2
			K.VSASNDAAEKAESLMDTVTIQELIK.N	2747.43	1.04		3
			R.MLVSPSIYK.N	1092.63	20		2
			K.AEVKPAVGCTEPVALALACAK.A	2239.22	0		3
			K.DIEFLLDGVK.M	1203.68	0		2
			K.IAEDYM(15.995)DNTPLSITPADTR.E	768.336	0		2
			K.IAEDYMDNTPLSITPADTR.E	2151.02	0		2
			K.MPVMSSNGSGNHGLTAILPIVAYNK.K	2627.36	0		3
			K.QDCFVPPLNGIVGSSVEQSIQNLGR.V	2742.38	0		3
WP_009903195.1	glycine--tRNA ligase subunit beta	glycine--tRNA			1.4	0.08	2
			K.GLSESDIYFK.Q	1213.62	1.35		2
			K.LSADILDSLGLVDEK.A	1642.9	1.5		2
			R.FAGDILPK.T	915.543	1.4		2
			K.MLPNFIAVR.N	1087.62	0		2
			K.NYIVLDQNK.R	1161.64	0		2
			R.FVGSTLEQLK.N	1176.68	0		2
WP_003419624.1	cold-shock protein	cold-shock			1.41	0.06	23
			K.GPQAANVVR.L	938.53	1.41		2
			K.TLEEGQSVEFEVVDGAK.G	1892.94	1.37		2
			K.TLEEGQSVEFEVVDGAK.G	1892.94	1.48		3
			K.GPQAANVVRL.-	1051.61	0		2
WP_003421121.1	30S ribosomal protein S4	30S			1.41	0.33	2
			K.AGENLLSLLER.R	1241.7	1.41		2
			K.VDIPSLIVK.V	1038.67	1.64		2
			K.VGDVIEVK.E	913.548	1.28		2
			K.WLEANVEGMTAK.V	1403.71	1.87		2
			R.IYGVLETQFR.N	1252.68	1		2
			K.RIYGVLETQFR.N	1408.78	0		2
			K.RIYGVLETQFR.N	1408.78	0		3
			K.WLEANVEGM(15.995)TAK.V	1075.5	0		2
			R.AENMPGK.A	801.405	0		2
WP_003436400.1	FAD-dependent oxidoreductase	FAD-dependent			1.41	0.4	234
			K.DGSLVGAILINDLSCTVK.L	1931.05	0.93		3
			K.IAGANASGDNLTFESEVYPVSLDAMNVK.V	2968.46	1.22		3
			K.IDYIVVSHTEPDHAGSVEK.L	2152.09	1.75		4
			K.IKDLDIDTVCPGHGPVLTENPR.K	2502.3	1.13		4
			K.VVASETAIK.Y	972.586	1.76		2
			R.ANTQMVQDTSVK.I	1376.7	2.03		2
			R.LGVAVDGIEGDGK.A	1284.69	1.41		2
			K.DGSLVGAILINDLSCTVK.L	1931.05	0		2
			K.EVTICYVSAHGYTK.I	1682.83	0		3
			K.GDFEDIMK.A	1009.48	0		2
			K.GHDLENVFTLR.N	1327.69	0		3
			K.IDYIVVSHTEPDHAGSVEK.L	2152.09	0		3
			K.IKENLYWVGSLDPDLR.V	1974.07	0		3
			K.TIIVNDGAIKFDK.L	1516.89	0		3
			K.TLVTCDSFGSHYSNDK.I	1885.85	0		3
WP_003438357.1	pyridoxal phosphate-dependent aminotransferase	pyridoxal			1.41	0.46	2
			K.GFFDAVK.N	838.459	2.17		2
			K.LVPFAQAAK.D	999.612	1.33		2
			R.VIIIDSVSK.R	1028.65	1.41		2
			K.AIILSNPGNPTGAIYTK.E	1786.01	0		2
			K.EELNILAEIAK.E	1297.75	0		2
			K.EGLEQYVALQK.-	1332.73	0		2
			R.DVLYNELMK.V	1179.62	0		2
			R.EFVYDGLEYTSCGNLEGVQDR.V	2479.1	0		2
WP_009901578.1	pyridoxal phosphate-dependent aminotransferase	pyridoxal			1.41	0	2
			K.LVNAVPVFIDTK.K	1370.82	1.41		2
			K.DITITINGFSKSAAMTGLRLGYTASNKTIAK.A	3355.86	0		3
			K.ILVINNPSNPTGSVYTK.D	1873.04	0		2
			K.VINLSIGEPDFNVPNNAK.S	1997.07	0		2
			K.VINLSIGEPDFNVPNNAK.S	1997.07	0		3
			K.YDLVPGLK.I	959.569	0		2
WP_003416870.1	thiol reductase thioredoxin	thiol			1.42	0	2
			K.VLGLPTMAIYK.D	1260.75	1.42		2
			K.LAETYGDKIK.F	1220.7	0		3
WP_003424103.1	coenzyme F420-0:L-glutamate ligase	coenzyme			1.42	0.16	2
			K.GLEGTPNEVK.L	1098.59	1.53		2
			K.IVVDSVLNASK.S	1199.71	1.31		2
WP_003430934.1	molecular chaperone DnaK	molecular			1.42	6.55	234
			K.AVKDNQDATAEELKK.A	1770.97	1.69		4
			K.EKIEAFNQAESTIYQTEK.T	2213.13	20		3
			K.IEAFNQAESTIYQTEK.T	1927.96	1.43		2
			K.IKEAEMNAEADK.Q	1431.73	1.38		2
			K.IKEAEMNAEADK.Q	1431.73	1.39		3
			K.ITITSNTNLSEAEIEQK.I	1947.02	1.39		2
			K.TALQDAGLSTGDIDDVLLVGGSTR.I	2402.24	1.63		2
			R.TTPSVVAFTK.D	1105.64	1.4		2
			K.AAQEQQAAQGAEQAQDNGPKDDNVVDADFKEVDEDK.-	3986.85	0		4
			K.EKIEAFNQAESTIYQTEK.T	2213.13	0		2
			K.ELSSTMSSNINLPFITATAEGPK.H	2464.26	0		2
			K.ELSSTMSSNINLPFITATAEGPK.H	2464.26	0		3
			K.IEAFNQAESTIYQTEK.T	1927.96	0		3
			K.ITITSNTNLSEAEIEQK.I	1947.02	0		3
			K.SQIFSTAADNQTAVDIHVLQGER.S	2528.27	0		3
			K.SYTPQEISAIILQK.L	1645.93	0		2
			K.TALQDAGLSTGDIDDVLLVGGSTR.I	2402.24	0		3
			R.IINEPTAAALAYGMDKLDQEKK.I	2531.38	0		4
			R.SMAYDNTTLGR.F	1255.59	0		2
WP_009901585.1	phosphoglucosamine mutase	phosphoglucosamine			1.42	0.42	23
			K.YMEYPEIK.T	1127.56	1.71		2
			R.AVLEHNADLGLAYDGDADR.L	2042.97	1.12		3
			R.GVANTELTCDLAYK.L	1609.8	0		2
			R.VMLEGKEEGQIK.E	1443.8	0		3
WP_009903261.1	PASTA domain-containing Ser/Thr kinase PrkC	PASTA			1.42	0	2
			K.EGTVLSQSPGAGSSR.A	1459.73	1.42		2
			R.AQEGDEVNLYVSK.G	1506.76	0		2
WP_003417352.1	class II fructose-1,6-bisphosphate aldolase	class			1.43	0.24	234
			K.GVPVDMLR.K	913.505	1.43		2
			K.LPGFPIVLHGASAVDQNAVATCNEFGGNIAGAK.G	3351.71	1.21		3
			K.LPGFPIVLHGASAVDQNAVATCNEFGGNIAGAK.G	3351.71	1.16		4
			K.LRFDILEEIQSK.L	1545.88	1.26		3
			K.YAGPHTLVEMVK.A	1399.75	1.76		2
			K.YAGPHTLVEMVK.A	1399.75	1.76		3
			K.YTQPAEAVEFVER.T	1565.77	1.6		2
			R.DAIQAVVESK.I	1114.62	1.43		2
			R.LAMTAAIR.K	873.511	1.7		2
			K.IDDVLGSANSIN.-	1244.62	0		2
			K.NSYVMIQASMSAVK.Y	1583.81	0		2
			R.FDILEEIQSK.L	1276.69	0		2
			R.TGVDSLAIAIGTSHGAFK.F	1799.98	0		3
WP_003417347.1	electron transfer flavoprotein subunit alpha/FixB family pr	electron			1.44	5.14	234
			K.DAIDEIKPEIMLFGATHIGR.D	2282.22	1.28		3
			K.ELITFGADK.V	1048.58	1.31		2
			K.IAPVVIELLGEGR.K	1392.83	1.32		2
			K.LADKLGGVVGSSR.A	1313.77	20		3
			K.LDSVDDLLEAIK.A	1385.77	2.25		2
			K.LDSVDDLLEAIKA.-	1456.8	1.77		2
			K.LGGVVGSSR.A	858.492	1.65		2
			K.VYVADDALLEK.Y	1290.71	1.55		2
			R.TGEVIALDYK.I	1163.64	1.44		2
			R.TTVLETVK.T	945.575	1.5		2
			R.VGTGLTADCTK.L	1177.6	1.17		2
			R.VGTGLTADCTKLEIDPEDKK.I	2302.22	1.44		3
			R.VGTGLTADCTKLEIDPEDKK.I	2302.22	1.42		4
			-.MNDIKDLSSYK.N	1396.73	0		2
			-.MNDIKDLSSYK.N	1396.73	0		3
			K.DAIDEIKPEIMLFGATHIGR.D	2282.22	0		4
			K.LEIDPEDKK.I	1169.65	0		2
			K.NVWIFAEQR.E	1189.62	0		2
			R.VGTGLTADCTKLEIDPEDK.K	2146.09	0		3
WP_003418660.1	cold-shock protein	cold-shock			1.44	0	2
			R.GPQAENVNRI.-	1124.59	1.44		2
WP_003419930.1	NADH peroxidase	NADH			1.44	4.64	2345
			K.AFLGLLNR.Y	930.565	1.51		2
			K.ELGLDAIHDTVHEMCKDEAR.H	2395.13	1.17		3
			K.ELGLDAIHDTVHEMCKDEAR.H	2395.13	1.26		4
			K.ELGLDAIHDTVHEMCKDEAR.H	2395.13	1.8		5
			K.FAELLGEVVVADTK.E	1545.87	20		3
			K.VGADKFEEMK.G	1236.64	1.38		2
			K.VGADKFEEMK.G	1236.64	1.43		3
			K.VGADKFEEMKGEK.N	1578.83	1.65		3
			R.EGYPEVGEAYK.R	1296.62	1.11		2
			R.IALEEAEHAAK.F	1236.67	1.45		3
			R.IGVAQGVDEEIIEGLR.A	1724.93	1.33		2
			R.IGVAQGVDEEIIEGLR.A	1724.93	1.38		3
			R.QADREGYPEVGEAYK.R	1766.85	1.77		3
			R.VDAEYGATDGK.L	1180.56	1.36		2
			R.VRVDAEYGATDGK.L	1435.73	1.51		2
			R.VRVDAEYGATDGK.L	1435.73	1.49		3
			K.FAELLGEVVVADTK.E	1545.87	0		2
			K.FAELLGEVVVADTKENLR.V	2059.14	0		2
			K.FAELLGEVVVADTKENLR.V	2059.14	0		3
			R.EGYPEVGEAYKR.I	1452.72	0		2
			R.IALEEAEHAAK.F	1236.67	0		2
			R.QADREGYPEVGEAYK.R	1766.85	0		2
			R.QADREGYPEVGEAYKR.I	1923.95	0		4
WP_003428573.1	electron transfer flavoprotein subunit alpha/FixB family pr	electron			1.44	9.35	23
			K.AADPIVVLFGATSIGR.D	1613.91	1.03		2
			K.VSALLLGSK.V	942.611	1.73		2
			K.YADVGIVGDVHK.V	1327.71	20		3
			R.ENVIQTVSLELLGK.A	1597.93	1.16		2
			K.VLPELISQLSVAK.E	1451.9	0		2
			R.IHTGLTADCTGLAVAEDTK.L	2029.02	0		3
WP_003434191.1	peptidylprolyl isomerase	peptidylprolyl			1.44	0	2
			R.VIEGMDTVDEIASVR.T	1660.83	1.44		2
			K.GEFSGNGFTNNLK.H	1439.7	0		2
			K.NSPHLDGQYAGFGR.V	1545.73	0		3
WP_003436178.1	elongation factor G	elongation			1.44	0.24	23
			K.EDSFIGIIDLLK.M	1417.81	0.97		2
			K.GGVEPQSENVWR.Q	1384.67	1.44		2
			K.GILADGEEAER.H	1186.58	1.38		2
			K.GNAVLLEPYFK.V	1305.73	1.04		2
			K.IMTDPFVGK.L	1062.58	0.96		2
			K.TVGGSVPK.E	799.48	1.53		2
			K.VEVVTPEDYMGDVMGDLNSR.R	2254.03	1.49		2
			K.VEVVTPEDYMGDVMGDLNSR.R	2254.03	1.53		3
			K.VYAGDIAAAVGLK.D	1302.75	1.56		2
			K.YLEGEELTIDELK.V	1606.83	1.41		2
			R.ETITQPVDVEYK.Y	1476.77	1.93		2
			R.GITITSAATTASWK.D	1462.8	1.65		2
			R.ILFYTGQTHK.I	1262.7	1.5		2
			R.ILFYTGQTHK.I	1262.7	1.44		3
			R.VAPQEPGEGYK.F	1229.63	1.42		2
			R.VYSGTLESGSYVLNATK.N	1844.96	1.4		2
			R.VYSGTLESGSYVLNATK.N	1844.96	1.55		3
			K.ATIACEMNPVFCGTAYR.N	1988.9	0		2
			K.IGETHEGASQMDWMEQEKER.G	2447.09	0		3
			K.KGNAVLLEPYFK.V	1461.86	0		3
			K.LVESVAETDEELM(15.995)MK.Y	1491.7	0		2
			K.MAGSMAFK.D	897.445	0		2
			K.VGAPQVAYR.E	987.55	0		2
			K.YLEGEELTIDELK.V	1606.83	0		3
			R.EKLVESVAETDEELMMK.Y	2065.04	0		3
			R.HSSDEEPFSALAFK.I	1619.78	0		3
			R.KATIACEMNPVFCGTAYR.N	2145.03	0		3
			R.NIGIMAHIDAGK.T	1294.71	0		3
			R.QAETYGVPR.I	1047.53	0		2
			R.SGAQVINAFVPLSEM(15.995)FGYSTDLR.S	1589.81	0		3
			R.VLDGSVAVFCAK.G	1320.71	0		2
WP_009888223.1	2-hydroxyisocaproyl-CoA dehydratase activator HadI	2-hydroxyisocaproyl-CoA			1.44	0.46	3
			K.IEDIVAGIHTSVAK.R	1507.86	1.76		3
			K.QISELSCHAR.G	1227.6	1.11		3
			K.NGEDIVASETISSGTGTTGPSR.V	2164.03	0		2
			R.FLDVMAK.I	878.494	0		2
			R.GVNFIIPETR.T	1172.66	0		2
			R.TIIDIGGQDAK.V	1185.66	0		2
WP_009889371.1	NADH peroxidase	NADH			1.44	4.64	2345
			K.AFLGLLNR.H	930.565	1.51		2
			K.ELGLDAIHDTVHEMCKDEAR.H	2395.13	1.17		3
			K.ELGLDAIHDTVHEMCKDEAR.H	2395.13	1.26		4
			K.ELGLDAIHDTVHEMCKDEAR.H	2395.13	1.8		5
			K.FAELLGEVVVADTK.E	1545.87	20		3
			K.VGADKFEEMK.G	1236.64	1.38		2
			K.VGADKFEEMK.G	1236.64	1.43		3
			R.IAFEEAEHAAK.F	1270.66	1.39		2
			R.IAFEEAEHAAK.F	1270.66	1.46		3
			R.IGVAQGVDAEIIEGLR.A	1666.93	1.25		2
			R.IGVAQGVDAEIIEGLR.A	1666.93	1.33		3
			R.QADREGYPEVAEAYKR.I	1937.97	1.91		3
			R.QADREGYPEVAEAYKR.I	1937.97	1.88		4
			R.VDAEYGATDGK.L	1180.56	1.36		2
			R.VRVDAEYGATDGK.L	1435.73	1.51		2
			R.VRVDAEYGATDGK.L	1435.73	1.49		3
			K.FAELLGEVVVADTK.E	1545.87	0		2
			K.FAELLGEVVVADTKENLR.V	2059.14	0		2
			K.FAELLGEVVVADTKENLR.V	2059.14	0		3
			K.VGADKFEEMKGEMVWADEHR.I	2448.16	0		3
			K.VGADKFEEMKGEMVWADEHR.I	2448.16	0		4
			K.VGADKFEEMKGEMVWADEHR.I	2448.16	0		5
			R.ANFTGECTEVGMYLAMSR.Q	2064.91	0		2
			R.ANFTGECTEVGMYLAMSR.Q	2064.91	0		3
			R.EGYPEVAEAYK.R	1310.64	0		2
			R.EGYPEVAEAYKR.I	1466.74	0		3
			R.QADREGYPEVAEAYK.R	1780.86	0		3
WP_009898301.1	phosphopyruvate hydratase	phosphopyruvate			1.44	0.16	23
			K.GLACGVGDEGGFAPNLGSNR.E	1975.93	1.28		2
			K.GLACGVGDEGGFAPNLGSNR.E	1975.93	1.36		3
			K.KYVLAGEGK.E	1047.63	1.53		2
			K.LGANAILGVSMAVAR.A	1469.84	1.2		2
			K.LQLVGDDLFVTNTER.L	1746.92	1.48		2
			K.RAGYTAVISHR.S	1257.69	1.53		2
			K.RAGYTAVISHR.S	1257.69	1.54		3
			K.VNQIGTITETLDAIEMAK.R	2003.07	1.4		2
			K.VNQIGTITETLDAIEMAK.R	2003.07	1.5		3
			R.AAADEIGLPLFQYLGGVNAK.Q	2103.14	1.03		3
			R.AGYTAVISHR.S	1101.59	1.51		2
			R.AIVPSGASTGAFEAVELR.D	1801.96	1.28		3
			R.EALELIVEAITK.A	1383.82	1.24		2
			R.IEEMVGEQAR.Y	1188.58	1.51		2
			-.MSVIELVYAR.E	1207.66	0		2
			K.AGYKPGEDVMLGLDVAATEMYNK.E	2556.27	0		3
			K.GIENGVANSILVK.V	1368.8	0		2
			K.VNQIGTITETLDAIEM(15.995)AK.R	1774.9	0		2
			K.VNQIGTITETLDAIEM(15.995)AK.R	1774.9	0		3
			R.AAADEIGLPLFQYLGGVNAK.Q	2103.14	0		2
			R.AIVPSGASTGAFEAVELR.D	1801.96	0		2
			R.AIVPSGASTGAFEAVELRDGDK.G	2246.16	0		3
WP_003421189.1	50S ribosomal protein L11	50S			1.45	0.16	23
			K.MPDLNAASVEAAMSMIAGTAR.S	2135.03	1.37		3
			K.TADQAGMIIPVVITVYQDR.S	2118.12	1.45		3
			K.TPPAAVLIK.K	964.632	1.68		2
			K.MPDLNAASVEAAMSMIAGTAR.S	2135.03	0		2
			K.TADQAGMIIPVVITVYQDR.S	2118.12	0		2
			R.SFSFITK.T	884.501	0		2
WP_009903275.1	aminopeptidase P family protein	aminopeptidase			1.45	0.29	2
			K.ATVSGELTEK.Q	1089.59	1.22		2
			R.AEAIVKPGVR.F	1094.68	1.45		2
			R.LNAVLEQMK.K	1100.63	1.8		2
			R.FLLNLIELCGGSK.F	1518.85	0		2
WP_003421962.1	type I glyceraldehyde-3-phosphate dehydrogenase	type			1.46	4.95	234
			K.DKAEAHIQAGAK.K	1321.74	1.59		3
			K.GLMTTIHAYTNDQNTLDGPHPK.G	2480.22	1.46		3
			K.GLMTTIHAYTNDQNTLDGPHPK.G	2480.22	1.45		4
			K.KVVISAPATGDLK.T	1381.85	20		2
			K.KVVISAPATGDLK.T	1381.85	1.66		3
			K.NVTVEEINAAMK.E	1373.72	1.86		2
			K.VLNDKYGIEK.G	1261.73	1.47		3
			K.VMEVDGK.Q	832.436	1.45		2
			K.VVISAPATGDLK.T	1225.73	1.43		2
			K.VVSWYDNEMSYTSQLIR.T	2119.01	1.6		2
			K.VVSWYDNEMSYTSQLIR.T	2119.01	1.35		3
			R.AAAGNIVPNTTGAAK.A	1410.78	1.37		2
			R.VPVVTGSITELVCTLGK.N	1829.04	1.44		2
			R.VPVVTGSITELVCTLGK.N	1829.04	1.37		3
			K.AIGLVIPSLK.G	1065.72	0		2
			K.FEVVAINDLTDAK.M	1489.8	0		2
			K.GLM(15.995)TTIHAYTNDQNTLDGPHPK.G	347.188	0		4
			K.MMEQQDKFEVVAINDLTDAK.M	2409.2	0		3
			K.VLNDKYGIEK.G	1261.73	0		2
			R.FNGEIEVK.E	990.539	0		2
			R.KMMEQQDKFEVVAINDLTDAK.M	2565.33	0		3
			R.TLGYFAQLAK.-	1166.67	0		2
WP_003428216.1	ribonuclease Y	ribonuclease			1.46	0	2
			K.LEEIANSYEGVEK.S	1535.77	1.46		2
WP_003437561.1	hypothetical protein	hypothetical			1.46	0	2
			K.IVDEYDYGYNAIYK.C	1781.86	1.46		2
			K.SQFIVTLIK.I	1103.7	0		2
WP_009901809.1	(R)-2-hydroxyisocaproyl-CoA dehydratase subunit HadB	(R)-2-hydroxyisocaproyl-CoA			1.46	0.27	23
			K.AQFEEVIK.Q	1018.57	2.09		2
			K.KGSLELCEIAESK.G	1546.83	1.49		3
			K.LLIEELEDNMK.T	1401.74	1.43		2
			R.AAEETGLPYAGFDGDQADPR.A	2107.95	1.4		2
			R.IQGLVEVMEER.K	1329.7	1.48		2
			R.RAAEETGLPYAGFDGDQADPR.A	2264.05	1.5		3
			R.VVINDLLAEQYANAFK.A	1864.02	1.21		2
			R.VVINDLLAEQYANAFK.A	1864.02	1.21		3
			K.KGSLELCEIAESK.G	1546.83	0		2
			K.LMSLIQYEMQR.R	1438.73	0		2
			K.YRVDSLVEGK.C	1220.68	0		3
			R.AAEETGLPYAGFDGDQADPR.A	2107.95	0		3
			R.AFTNAQFETR.I	1211.59	0		2
WP_009902143.1	formate C-acetyltransferase	formate			1.46	3.58	234
			K.AGIVTEEELQEYMDHFVMK.L	2325.11	1.32		3
			K.EAVQWLYFGYLGAVK.D	1799.97	1.48		2
			K.EAVQWLYFGYLGAVK.D	1799.97	1.36		3
			K.ELETIVGLQTDAPLKR.A	1839.05	1.07		3
			K.EQQLDVINR.T	1141.61	1.33		2
			K.MAESYGFDISKPATNSK.E	1929.96	1.71		2
			K.MAESYGFDISKPATNSK.E	1929.96	1.89		3
			K.MVENSCEAFGYELDPEIKDIFTK.Y	2819.35	1.31		3
			K.QMQFFGAR.V	1011.5	1.63		2
			K.SGVQVGPR.F	826.466	1.46		2
			K.SLEVSCMDEEVIR.L	1593.74	1.47		2
			K.THNQGVFDVYTPEMR.A	1820.85	3.12		3
			K.TVSGIAAYAPGYLDKELETIVGLQTDAPLKR.A	3373.86	0.89		4
			K.VSIDTSSVQYENDDLMR.A	1999.92	1.69		2
			K.VSIDTSSVQYENDDLMR.A	1999.92	1.57		3
			R.AVMPYGGIK.M	990.557	1.57		2
			R.EFIQLNYSPYEGNDSFLAGATENTK.K	2864.36	1.55		3
			R.FEPITSEYLDYDEVMSK.F	2121.99	2.38		2
			R.KSGIITGLPDAYGR.G	1502.85	1.33		2
			R.KSGIITGLPDAYGR.G	1502.85	1.38		3
			R.KTHNQGVFDVYTPEMR.A	1977.98	20		3
			R.LREEITEQISALNELKK.M	2098.21	1.28		3
			R.LREEITEQISALNELKK.M	2098.21	1.27		4
			R.NSYPTQSILTITSNVVYGK.K	2141.14	1.63		3
			R.VALYGVDALIEDKNEQK.K	1989.09	1.08		3
			R.VALYGVDALIEDKNEQKK.S	2145.21	1.28		3
			R.VALYGVDALIEDKNEQKK.S	2145.21	1.36		4
			K.AGIVTEEELQEYMDHFVM(15.995)K.L	2168.98	0		3
			K.EINVREFIQLNYSPYEGNDSFLAGATENTK.K	3476.7	0		3
			K.ERENGGTLDVDTK.T	1488.74	0		3
			K.LPYEHAQDGISNTFSIVPGALGK.D	2470.29	0		3
			K.LWDEAMVLFK.K	1306.7	0		2
			K.M(15.995)VENSCEAFGYELDPEIKDIFTK.Y	177.082	0		3
			K.MVENSCEAFGYELDPEIK.D	2186.99	0		3
			K.SGIITGLPDAYGR.G	1346.72	0		2
			K.SLEVSCM(15.995)DEEVIR.L	852.372	0		2
			K.TLLYAINGGVDEK.S	1447.79	0		2
			K.TVSGIAAYAPGYLDK.E	1580.85	0		2
			K.VSIDTSSVQYENDDLM(15.995)R.A	1842.82	0		2
			K.VSIDTSSVQYENDDLM(15.995)R.A	1842.82	0		3
			R.AGAPFAPGANPM(15.995)HGR.D	1127.54	0		2
			R.AGAPFAPGANPM(15.995)HGR.D	1127.54	0		3
			R.AGAPFAPGANPMHGR.D	1477.72	0		3
			R.ATLEDAM(15.995)EHPEEYPQLTIR.V	777.358	0		3
			R.ATLEDAMEHPEEYPQLTIR.V	2271.09	0		3
			R.AYWGDDYGIACCVSAMR.I	2022.85	0		2
			R.DTNGALASLSSVAK.L	1388.75	0		2
			R.EFIQLNYSPYEGNDSFLAGATENTK.K	2864.36	0		2
			R.EFIQLNYSPYEGNDSFLAGATENTKK.L	3020.48	0		3
			R.FEPITSEYLDYDEVM(15.995)SK.F	1878.83	0		2
			R.FEPITSEYLDYDEVM(15.995)SK.F	1878.83	0		3
			R.FEPITSEYLDYDEVMSK.F	2121.99	0		3
			R.LREEITEQISALNELK.K	1942.08	0		3
			R.NEQGIAVDFEIEGDYPK.Y	1979.96	0		2
			R.NSYPTQSILTITSNVVYGK.K	2141.14	0		2
			R.RAGAPFAPGANPM(15.995)HGR.D	1283.64	0		3
			R.TMACGMAGLSVCADSLSAIK.H	2099	0		2
			R.TMACGMAGLSVCADSLSAIK.H	2099	0		3
			R.TSTFLDIYFER.D	1418.71	0		2
			R.VALYGVDALIEDKNEQK.K	1989.09	0		2
WP_003417105.1	ATP-dependent Clp protease ATP-binding subunit ClpX	ATP-dependent			1.47	0.11	2
			K.TLLAQTLAR.T	1013.62	1.55		2
			R.DVSGEGVQQALLK.I	1398.77	1.39		2
			K.SNILLLGPTGSGK.T	1311.78	0		2
WP_003429267.1	50S ribosomal protein L9	50S			1.47	0	2
			K.MAVQADSVAIK.E	1187.66	1.47		2
			K.EIAEQLKK.Q	1041.64	0		2
			R.SLGSTFVEIK.I	1135.65	0		2
WP_003429485.1	DNA-directed RNA polymerase subunit beta	DNA-directed			1.47	0.01	2
			K.TLLQNIDLEQQSK.D	1584.87	1.46		2
			R.LLELGAPDIIVR.N	1335.81	1.48		2
			K.ASLATDSFLSAASFQETTR.V	2031	0		2
			K.EGNEVIEEIYDR.I	1492.7	0		2
			K.IALASPEK.I	883.538	0		2
			K.VKPEVWDVLEDVIK.S	1753.01	0		3
			R.EGLSVLEYFTSSHGAR.K	1779.88	0		3
			R.EIDCGTEDTTEIYAIK.E	1912.9	0		2
			R.RLVDVSQDVIVR.E	1425.83	0		3
WP_003438103.1	beta-ketoacyl-ACP synthase II	beta-ketoacyl-ACP			1.47	0	3
			K.LAVEDANLDLDKVDR.E	1740.93	1.47		3
			K.GPNTNVCTACASGTHSIGDAFK.V	2321.06	0		3
			K.ITNFDASTYQTQIAGEVK.N	2042.04	0		2
			R.FGVIIGSGIGGVEAIETQHK.I	2068.14	0		3
WP_009892576.1	NAD(P)/FAD-dependent oxidoreductase	NAD(P)/FAD-dependent			1.47	0	2
			K.VVQTEDITVNYDK.L	1578.81	1.47		2
			R.GIIIDDMCQTTQK.D	1577.78	0		2
WP_003429004.1	ATP-binding cassette domain-containing protein	ATP-binding			1.48	0.18	3
			K.ILSGEIEPNTGSISITDKER.M	2215.18	1.35		3
			R.EIGNEVLEVHNLTK.T	1649.9	1.6		3
			K.ILMGLGITK.D	1000.64	0		2
			R.EIGNEVLEVHNLTK.T	1649.9	0		2
WP_009889571.1	nucleoside hydrolase	nucleoside			1.48	0.15	23
			K.LVTAQDTHGEDGIGENFYQK.V	2278.09	1.37		3
			K.VSIIALAPLTNIAK.A	1478.94	1.58		2
			K.AFENLDEFVSMGGAFR.I	1817.85	0		2
			K.AFENLDEFVSMGGAFR.I	1817.85	0		3
			K.KNPNAIVLNEVDEK.K	1665.93	0		2
			K.NGAVDFIINTLHNHEK.V	1877.98	0		3
			K.NPNAIVLNEVDEK.K	1509.8	0		2
			K.YITEITR.F	922.512	0		2
			R.KLVTAQDTHGEDGIGENFYQK.V	2434.22	0		3
			R.KLVTAQDTHGEDGIGENFYQK.V	2434.22	0		4
WP_009890867.1	cell division protein FtsZ	cell			1.48	0	2
			K.GVEFISVNTDK.Q	1263.67	1.48		2
			K.NTSMLDAFAVADDVLK.Q	1764.9	0		2
WP_003417090.1	trigger factor	trigger			1.49	0.15	23
			K.ITVDNNKFEAAVNK.A	1645.9	1.53		3
			K.MASAYNMEVEK.I	1327.62	1.75		2
			K.SSLVLEAITK.A	1115.68	1.34		2
			K.TIDLLVDNATIA.-	1285.71	1.46		2
			K.VENTVSDENVDAK.L	1474.72	1.49		2
			R.AKLEEEAK.N	1000.58	1.49		2
			R.IVIETQYGK.G	1105.64	1.75		2
			K.AEGIEATEEEFKAELEK.M	2007.01	0		2
			K.AEGIEATEEEFKAELEK.M	2007.01	0		3
			K.ITVDNNKFEAAVNK.A	1645.9	0		2
			R.KTIDLLVDNATIA.-	1441.84	0		2
WP_003420374.1	thioredoxin	thioredoxin			1.49	0.3	23
			K.DGKPVETLIGFMPK.N	1614.91	1.6		2
			K.DGKPVETLIGFMPK.N	1614.91	1.49		3
			K.VINTSEFR.S	992.529	1.04		2
			K.DGKPVETLIGFM(15.995)PK.N	1361.73	0		3
WP_003421163.1	30S ribosomal protein S3	30S			1.49	0.24	23
			K.EFGNLLLEDHNIR.K	1596.83	1.51		3
			K.MDLHVAKPGVVIGR.A	1546.9	1.44		3
			R.ADIDYGFAEADTTYGK.I	1791.82	1.55		2
			R.AGAGIEALK.A	884.533	1.23		2
			R.AGAGIEALKAELEK.M	1482.87	1.28		3
			R.TEGYSEGNVPLQTLR.A	1690.85	1.49		2
			R.VGVIKDWDSR.W	1229.68	1.98		3
			K.NAQLVAENIALAIER.R	1651.93	0		2
			K.NAQLVAENIALAIER.R	1651.93	0		3
			K.TIIVNIVEVR.S	1182.73	0		2
			K.VWICNGEVLPTR.D	1470.77	0		2
			R.AGAGIEALKAELEK.M	1482.87	0		2
WP_003423106.1	IMP dehydrogenase	IMP			1.49	0.25	23
			K.DNVTLSLSK.V	1031.59	1.63		2
			K.VGAGNVVDREGFLYLAEAGADFVK.V	2553.33	1.61		3
			R.EGFLYLAEAGADFVK.V	1684.87	1.09		2
			R.GQATSIIEVAQAR.D	1370.75	1.36		2
			K.LSFEEGVDSYVPYAGSLK.D	2017.01	0		2
			K.TGHSTVAVTEDGTSTGK.L	1702.84	0		2
			K.TGHSTVAVTEDGTSTGK.L	1702.84	0		3
			K.VSEFMTPMSSIVYANK.D	1859.92	0		2
WP_011860916.1	translation initiation factor IF-3	translation			1.49	0.08	23
			R.LRPGIEQNDLNTK.A	1552.86	1.49		3
			R.VLSPTGEQLGVMPTK.E	1611.89	1.58		2
			R.VLSPTGEQLGVMPTK.E	1611.89	1.42		3
			R.LRPGIEQNDLNTK.A	1552.86	0		2
			R.VLSPTGEQLGVM(15.995)PTK.E	1257.66	0		2
WP_003425850.1	F0F1 ATP synthase subunit beta	F0F1			1.5	0.47	23
			K.TVLIQELINNIAK.Q	1523.93	0.83		2
			K.VVDLLAPYLK.G	1185.74	1.59		2
			K.VVQIVGAVLDVK.F	1294.82	2.25		2
			R.FLSQSFTVAEQFTGNPGQYVPVK.E	2600.34	2		3
			R.ILDPSIVGK.E	996.622	1.5		2
			R.QISSLGIYPAVDPLESTSR.I	2061.08	1.2		2
			R.TREGNDLYGEMSESGVINK.T	2155.03	1.49		3
			K.FDSEQSLPNLLNALVIK.L	1957.1	0		2
			K.FDSEQSLPNLLNALVIK.L	1957.1	0		3
			K.LGDKEIVAEVAQHIGDDTVR.C	2221.18	0		3
			K.TALVFGQMNEPPGAR.M	1614.82	0		2
			R.EGNDLYGEMSESGVINK.T	1896.88	0		2
			R.FTQAGSEVSALLGR.M	1462.78	0		2
			R.GMEVVDTGGPISVPVGDETLGR.I	2213.11	0		2
WP_003430702.1	transketolase family protein	transketolase			1.5	0.38	2
			K.HYGLTTEDIVK.N	1330.71	2.18		2
			R.AATPDVNSENYK.F	1363.66	1.46		2
			R.GIPNMVVLNPADALEAR.Q	1806.97	1.34		2
			R.NSVAYPNLNVK.I	1273.7	1.55		2
			K.DVFGQSGTPADLLK.H	1502.8	0		2
			K.ELAENKDIVVLDADLGK.A	1926.08	0		3
			K.VVTAEEHSIIGGLGSAVCEALAETK.D	2597.35	0		3
			R.FFDMGIAEGDMIGTAAGLATCGK.I	2389.12	0		3
			R.GIPNMVVLNPADALEAR.Q	1806.97	0		3
			R.QAILASIDYNGPVYIR.L	1820.99	0		2
WP_004454140.1	aspartate--tRNA ligase	aspartate--tRNA			1.5	0.1	23
			K.VGQEGVTSPIAK.F	1240.7	1.57		2
			R.KQISSLEEHAK.T	1352.77	1.43		3
			K.QLLMVSGMDR.Y	1176.6	0		2
			K.SETPPIYIKDDDDVSEALR.L	2219.1	0		3
WP_009902000.1	threonine--tRNA ligase	threonine--tRNA			1.5	0.22	2
			K.GVANLIDGIYK.T	1217.7	1.66		2
			R.VAFGSIER.F	905.497	1.35		2
			K.NKDLEEYLHLLEEAK.K	1928.03	0		3
			R.AFTQDDSHIFMLPEQIKDEIK.G	2589.32	0		4
			R.HTSAHILAQAIK.R	1344.79	0		3
			R.LVPEDLEK.I	997.57	0		2
			R.QFDNTYIGQDGEK.H	1569.73	0		2
WP_003421166.1	MULTISPECIES: 30S ribosomal protein S19	MULTISPECIES:			1.51	0	2
			K.LGEFVPTR.T	945.528	1.51		2
			K.HVPVYITEDMVGHK.L	1679.87	0		3
			R.SSTVFPQMVENTIAVHDGR.K	2116.05	0		3
WP_003435867.1	methionine--tRNA ligase	methionine--tRNA			1.51	0	2
			K.GLEDLSVTR.T	1016.55	1.51		2
			K.GNVVYPEPIIER.Y	1412.77	0		2
			K.GQDDITTWESTK.T	1435.68	0		2
			R.IIATLINPIMNETANK.I	1811.02	0		2
			R.IIATLINPIMNETANK.I	1811.02	0		3
WP_009887891.1	MULTISPECIES: 50S ribosomal protein L22	MULTISPECIES:			1.51	0.07	23
			K.LYIASIVANQGPTMK.R	1660.92	1.46		2
			K.LYIASIVANQGPTMK.R	1660.92	1.56		3
			K.NVDEALAILK.F	1140.68	0		2
			R.GKNVDEALAILK.F	1353.82	0		2
			R.GKNVDEALAILK.F	1353.82	0		3
			R.KAGQICDLVR.G	1214.68	0		3
WP_003416451.1	RidA family protein	RidA			1.52	0.04	23
			K.AILAESGADFSNVVK.T	1575.85	1.5		2
			K.AILAESGADFSNVVK.T	1575.85	1.55		3
			K.DM(15.995)NEFGAINEVYAEYFGENKPAR.A	292.109	0		3
			K.DMNEFGAINEVYAEYFGENKPAR.A	2720.26	0		3
			K.HEVIHTNDAPAALGPYSQAIK.A	2288.2	0		3
WP_003421122.1	30S ribosomal protein S11	30S			1.52	0	2
			K.STPFASQMAAETAAK.A	1565.78	1.52		2
			K.DVTPIPHNGCRPPK.R	1642.86	0		4
			R.ALQATGLEVTM(15.995)IK.D	1160.61	0		2
			R.ALQATGLEVTMIK.D	1429.82	0		2
			R.KSTPFASQMAAETAAK.A	1721.9	0		3
WP_003421175.1	30S ribosomal protein S10	30S			1.52	0.24	2
			K.AGSQVSGPVPLPTEK.Q	1521.84	1.35		2
			K.LLDFSAGK.I	905.522	1.69		2
			K.KAGSQVSGPVPLPTEK.Q	1677.97	0		3
			R.LIDIANPTPK.T	1136.68	0		2
WP_003422090.1	proline racemase	proline			1.52	0.67	23
			K.FVYESILGTLFK.G	1471.83	1.43		2
			K.IEIQHPTLAHIK.T	1454.86	2.13		3
			K.VADFNAVVPK.I	1114.64	2.71		2
			R.GDVTVVDGK.A	944.518	0.98		2
			R.SIQAIDSHTAGEATR.I	1583.79	1.52		2
			K.EYLEENLDYLR.T	1483.72	0		2
			K.GEIVEETK.V	959.518	0		2
			K.NVVIFGQGQVDR.S	1358.73	0		2
			R.IVVGGIPNIK.G	1064.7	0		2
WP_003434148.1	triose-phosphate isomerase	triose-phosphate			1.52	0.31	23
			K.ALENVLKDDLAK.V	1411.83	1.46		3
			K.ALEVGIDPILCVGETLEQR.E	2140.13	0.68		3
			K.EALEFVNEVK.D	1232.67	1.52		2
			K.GAFTGEVSPLMLK.E	1404.77	1.56		2
			K.GLYGELANEVR.I	1247.65	1.61		2
			K.IGAQNMHFEEK.G	1358.67	1.56		3
			K.TATAEDANDVISYIR.E	1665.82	1.52		2
			K.VVVAYEPIWAIGTGK.T	1657.94	1.28		2
			K.ALENVLKDDLAK.V	1411.83	0		2
			K.EALEFVNEVKDK.V	1503.82	0		2
			K.VVVAYEPIWAIGTGK.T	1657.94	0		3
			R.QYFNETDETVNKK.V	1698.85	0		2
			R.QYFNETDETVNKK.V	1698.85	0		3
			R.RQYFNETDETVNKK.V	1855.95	0		3
WP_003436174.1	DNA-directed RNA polymerase subunit beta	DNA-directed			1.52	0.04	23
			K.VLTDEDQEIEVR.E	1472.74	1.49		2
			R.LSTIHIEEYECEAR.D	1776.84	1.54		3
			K.AIQNAGINVVNLLMDDDKK.V	2155.18	0		3
			K.GDVIADGPATDLGEVALGR.N	1852.95	0		2
			R.ALGIGTDAEIIDLLGEDER.L	2028.05	0		2
			R.DIPNVGDSAIK.N	1183.64	0		2
			R.IGAEVDSGDILVGK.V	1427.79	0		2
			R.VDYMDISPK.Q	1122.56	0		2
WP_003439524.1	argininosuccinate synthase	argininosuccinate			1.52	0	2
			K.AYVDDISEEFVTETIFK.A	2062.02	1.52		2
			K.DAEGFINLFTLPLK.I	1632.91	0		2
			K.SREDAIDYAEK.H	1351.66	0		2
			R.ESIDAFMEQTQDNVTGTVK.V	2169.03	0		2
			R.FEATIAALDPTIK.V	1444.82	0		2
WP_003419082.1	50S ribosomal protein L21	50S			1.53	0.13	2
			K.LGSPVVEGASVQAK.V	1396.79	1.62		2
			K.VSEGDVLFVEK.L	1276.69	1.44		2
			K.LEANAGDVVTLNEVLACSK.D	2059.07	0		2
			K.LEANAGDVVTLNEVLACSK.D	2059.07	0		3
			K.LGSPVVEGASVQAK.V	1396.79	0		3
WP_003421187.1	50S ribosomal protein L10	50S			1.53	0.25	23
			K.APVSNFAYLIDAIAK.K	1647.92	1.55		2
			K.GLTVEEVTELRK.Q	1428.82	1.1		2
			K.GLTVEEVTELRK.Q	1428.82	1.51		3
			K.IVEMANIPSR.E	1156.63	1.19		2
			K.SEVVSEIVEK.L	1173.65	1.6		2
			K.SSAAVVVDYK.G	1093.6	1.76		2
			K.GLTVEEVTELR.K	1272.69	0		2
			K.M(15.995)GIVEGAFYDESK.I	177.082	0		2
			K.MGIVEGAFYDESK.I	1500.72	0		2
WP_003427766.1	isocaprenoyl-CoA:2-hydroxyisocaproate CoA-transferase HadA	isocaprenoyl-CoA:2-hydroxyisocaproate			1.53	0.53	234
			K.DKPGFDYTAYFAR.G	1605.78	1.17		2
			K.DKYPGLIFSQILGYGEK.G	2012.11	1.57		2
			K.DKYPGLIFSQILGYGEK.G	2012.11	1.53		3
			K.GPLKDKPGFDYTAYFAR.G	2030.07	3.38		4
			K.GTSPANTAAGFGDHYAGLALAAGSLAALHK.K	2866.48	1.23		4
			K.IEPIEGDGIR.V	1125.6	1.5		2
			K.IVGEAMLEK.T	1044.59	1.61		2
			K.LLSEADIFVTNVR.V	1503.83	1.58		2
			K.LLSEADIFVTNVR.V	1503.83	1.49		3
			K.MGIAYDQIK.D	1093.58	2.48		2
			K.MLGDWGAEVIK.I	1273.67	1.38		2
			K.SKEGVEILHK.L	1222.73	2.01		2
			K.SKEGVEILHK.L	1222.73	1.99		3
			K.TLDEWSALLEEADLPFEK.I	2162.09	1.27		2
			K.TLDEWSALLEEADLPFEK.I	2162.09	1.16		3
			K.TYDSGNTGVLVNTPVMFR.N	1998.99	1.68		2
			K.VGQHTVEVLK.S	1164.69	1.35		2
			R.ENPNSPLMTTYK.C	1449.72	1.6		2
			R.GGVSQSVMEK.G	1076.55	1.5		2
			K.DKPGFDYTAYFAR.G	1605.78	0		3
			K.GTSPANTAAGFGDHYAGLALAAGSLAALHKK.A	3022.61	0		5
			K.KTYDSGNTGVLVNTPVMFR.N	2155.12	0		3
			K.SLGYDEEKINNFK.D	1639.85	0		3
			K.SPASDDENPMFELENGNK.K	2049.9	0		2
			K.SPASDDENPMFELENGNKK.G	2206.03	0		3
			K.TYDSGNTGVLVNTPVM(15.995)FR.N	1694.82	0		2
			K.TYDSGNTGVLVNTPVMFR.N	1998.99	0		3
			K.VVELSSFIAAPCCAK.M	1706.87	0		2
			K.VVELSSFIAAPCCAK.M	1706.87	0		3
			R.ENPNSPLM(15.995)TTYK.C	928.432	0		2
			R.NEGIKEYTPAPK.V	1429.78	0		2
WP_009887863.1	elongation factor Tu	elongation			1.53	3.94	234
			K.FTAEVYVLK.K	1124.65	1.57		2
			K.LLDQAQAGDNIGALLR.G	1694.93	1.45		2
			K.LLDQAQAGDNIGALLR.G	1694.93	1.58		3
			K.TTLTAAITK.T	974.601	1.36		2
			K.VQDEVELVGLTEAPR.K	1681.89	1.76		2
			R.DLLTEYDFPGDDTPIVR.G	1993.97	1.35		2
			R.DLLTEYDFPGDDTPIVR.G	1993.97	1.29		3
			R.DTDKPFLMPVEDVFSITGR.G	2223.13	1.74		3
			R.EHILLSR.Q	894.529	3.07		2
			R.GITISTAHVEYETPNR.H	1814.92	1.45		2
			R.GITISTAHVEYETPNR.H	1814.92	1.49		3
			R.GSALMALEDPK.S	1186.63	1.69		2
			R.GSALMALEDPKSEWGDK.I	1917.96	20		3
			R.HYAHVDCPGHADYVK.N	1824.84	1.39		3
			R.HYAHVDCPGHADYVK.N	1824.84	1.63		4
			R.KLLDQAQAGDNIGALLR.G	1852.06	1.4		3
			R.KVVVTGVEMFR.K	1319.76	1.85		3
			R.QVGVPYIVVFLNK.C	1530.92	1.14		2
			R.QVGVPYIVVFLNK.C	1530.92	1.83		3
			R.YQLGEAVDFANIDK.A	1637.83	1.27		2
			R.YQLGEAVDFANIDKAPEER.E	2221.11	1.96		2
			R.YQLGEAVDFANIDKAPEER.E	2221.11	1.4		3
			K.IVELFEQIDEYIPAPER.D	2089.08	0		2
			K.IVELFEQIDEYIPAPER.D	2089.08	0		3
			K.NMITGAAQM(15.995)DGAILVCSATDGPMPQTR.E	963.452	0		3
			K.NMITGAAQMDGAILVCSATDGPMPQTR.E	2834.33	0		3
			R.DTDKPFLM(15.995)PVEDVFSITGR.G	1021.52	0		3
			R.GSALM(15.995)ALEDPK.S	505.257	0		2
			R.GSALMALEDPKSEWGDK.I	1917.96	0		2
			R.KVVVTGVEMFR.K	1319.76	0		2
			R.TKPHVNIGTIGHVDHGK.T	1894.06	0		4
			R.TVASGVVATIIE.-	1186.68	0		2
WP_003421125.1	30S ribosomal protein S13	30S			1.54	0.23	2
			K.ATANEILAK.A	985.581	1.83		2
			R.AEIGLTYIYGIGK.A	1452.82	1.54		2
			R.IAGVDLPR.E	867.518	1.38		2
			K.AEINPDTR.I	942.477	0		2
			K.RAEIGLTYIYGIGK.A	1608.92	0		3
			R.KVIDDDFLVEGDLRR.E	1846	0		4
WP_003424537.1	30S ribosomal protein S2	30S			1.54	0.18	23
			K.DMPELPGAMFVVDPR.K	1700.83	1.55		2
			K.EVAETGKPILFVGTK.K	1671.98	1.51		3
			K.KQAQDAIKDEAER.C	1584.85	1.7		2
			K.KQAQDAIKDEAER.C	1584.85	1.65		3
			K.MEEEGVFNVLPK.K	1446.74	1.37		2
			K.QAQDAIKDEAER.C	1428.72	1.27		2
			K.QAQDAIKDEAER.C	1428.72	1.22		3
			R.CGMYFVNER.W	1202.52	1.51		2
			R.KENIAIQEAHR.L	1363.76	1.56		2
			R.KENIAIQEAHR.L	1363.76	1.55		3
			R.LGIPVVGIVDTNCDPEQLDFAIPGNDDAIR.A	3251.62	1.15		3
			R.QGAEEEVAEDQE.-	1360.56	1.54		2
			R.WLGGMLTNHK.T	1211.65	1.74		3
			K.DMPELPGAMFVVDPR.K	1700.83	0		3
			K.EVAETGKPILFVGTK.K	1671.98	0		2
			K.LITGAM(15.995)ATAVIEGR.Q	632.357	0		2
			K.LITGAMATAVIEGR.Q	1429.8	0		2
			K.QLLEAGVHFGHQTR.R	1619.85	0		4
			R.ELEKMEEEGVFNVLPK.K	1975.04	0		2
			R.ELEKMEEEGVFNVLPK.K	1975.04	0		3
			R.NGIYIIDLQK.T	1231.72	0		2
WP_003427762.1	acyl-CoA dehydrogenase family protein	acyl-CoA			1.54	0.18	234
			K.ALQLHGGYGFIK.D	1358.77	1.4		2
			K.ALQLHGGYGFIK.D	1358.77	1.54		3
			K.ALQLHGGYGFIKDYEIER.M	2165.14	1.78		4
			K.ELDTLPAEMDK.T	1316.65	1.71		2
			K.FQNTQFTIADMETK.V	1728.84	1.99		2
			K.IAMGTLEVGR.I	1073.59	1.65		2
			K.MVISSNVLK.-	1045.62	1.87		2
			K.YYASEIANEVAYK.A	1575.78	1.56		2
			R.GLVYDAAQK.R	1019.57	1.43		2
			R.GTETSDLIFENVK.V	1507.78	1.49		2
			R.GTETSDLIFENVK.V	1507.78	1.51		3
			R.IVSIYEGTSEVQK.M	1507.81	1.49		2
			R.IVSIYEGTSEVQK.M	1507.81	1.5		3
			K.ALQLHGGYGFIKDYEIER.M	2165.14	0		3
			K.ELDTLPAEMDKTGVMPK.E	1959.01	0		2
			K.ELDTLPAEMDKTGVMPK.E	1959.01	0		3
			K.FQNTQFTIADM(15.995)ETK.V	1342.62	0		2
			K.FQNTQFTIADMETK.V	1728.84	0		3
			K.GIATGELIGAFGLTEPGAGSDAGGQQTTAELVGDHYILNGR.K	4043.01	0		4
			K.WDGFSTGAHEDK.M	1404.63	0		3
			R.CASTATFVTAGSSLASLPILYNGTEEQK.Q	2972.49	0		3
			R.GTETSDLIFENVKVPK.E	1861.03	0		3
			R.GTSAFIVESK.W	1093.6	0		2
WP_003435668.1	50S ribosomal protein L6	50S			1.54	0.19	23
			K.QLVGNYAAK.I	1018.58	1.79		2
			K.YVDEVIR.R	920.497	1.67		2
			R.TLLDNMVVGVNTGFEK.K	1791.94	1.39		2
			R.TLLDNMVVGVNTGFEK.K	1791.94	1.42		3
WP_009887887.1	50S ribosomal protein L4	50S			1.54	0.92	23
			K.ALVVIADKNDNVIK.S	1594.97	1.54		3
			K.YDSFIITTDAVK.K	1427.75	1.45		2
			R.NIEGVQTALVNTMNVYDILK.Y	2291.23	3.09		2
			K.VQNSEVIVLDALNMDAPK.T	2012.07	0		2
			K.VQNSEVIVLDALNMDAPK.T	2012.07	0		3
			R.SVQWVGGGVAFAPK.P	1457.8	0		2
WP_009897501.1	phosphoglucomutase	phosphoglucomutase			1.54	0	2
			K.TAIVTDSITSEGLAK.F	1560.86	1.54		2
			K.FFTESGGLEK.T	1169.6	0		2
			K.SIDGWSVAPNNFEGIR.V	1788.88	0		2
WP_009903252.1	DUF4091 domain-containing protein	DUF4091			1.54	0.55	2
			K.AFVNDAILR.D	1045.59	1.15		2
			R.NVVLNPLDESK.F	1282.71	1.93		2
			K.AGDMFFVYPGK.D	1286.64	0		2
WP_003421367.1	F0F1 ATP synthase subunit alpha	F0F1			1.55	0	2
			R.SVYEPLQTGIK.S	1289.72	1.55		2
			K.SIDSMIPIGR.G	1115.6	0		2
			K.TSIVIDTILNQK.G	1399.83	0		2
			R.EAYPGDVFYLHSR.L	1580.76	0		2
			R.EAYPGDVFYLHSR.L	1580.76	0		3
			R.ELAAFSQFGSDLDEDTK.K	1928.91	0		2
			R.IVEVPVGEALIGR.V	1378.82	0		2
			R.STIAQLVSSLEK.G	1330.77	0		2
			R.VVNSLGQPIDGK.G	1281.73	0		2
WP_009902521.1	cell wall-binding protein Cwp20	cell			1.55	10.68	2
			K.ATLALSDETPGYIVNTK.I	1848.99	1.55		2
			K.GVPVNYSLVTK.N	1231.72	1.46		2
			K.NAPILLTGSSQINEK.T	1639.91	20		2
			K.ENSGLYASSNMIK.V	1468.72	0		2
			K.NVYVVGGEASINEK.S	1533.8	0		2
			K.SFTCELESNGYTK.W	1590.72	0		2
			K.SYVIGGEYTVSK.N	1357.71	0		2
WP_009902686.1	siderophore ABC transporter substrate-binding protein	siderophore			1.55	0	2
			R.QEDFYEQLSK.I	1341.65	1.55		2
			K.ESSHGQNITFEYIAK.Q	1778.88	0		3
WP_009904144.1	rod shape-determining protein	rod			1.55	0.58	23
			K.DAFLIEEPMAAAIGAGLK.V	1873.01	2.6		3
			K.EVLAVGEEAK.K	1099.61	1.31		2
			K.EVLAVGEEAKK.M	1255.74	1.48		3
			K.SVEDQEIFEK.V	1278.63	1.62		2
			K.DAFLIEEPMAAAIGAGLK.V	1873.01	0		2
			K.EYNLMIGER.T	1151.56	0		2
			K.LITQETGMSVQIAETPLDCVALGTGK.S	2788.44	0		3
			R.EALKEPVSSIVDAIK.S	1681.99	0		3
			R.IAICVPFGVTEVEK.R	1616.88	0		2
			R.IGGDEFDESIVAYVK.K	1696.86	0		2
WP_003432462.1	methionine adenosyltransferase	methionine			1.56	0	2
			R.FVIGGPQGDTGLTGR.K	1501.79	1.56		2
			K.TGEEIEEEIEK.V	1360.66	0		2
WP_003437840.1	uracil phosphoribosyltransferase	uracil			1.56	0	2
			R.AGLGMVDGLVSLMPAAK.V	1684.93	1.56		2
			K.LANLVAAPEGIAEVQK.Y	1677.97	0		2
			K.LANLVAAPEGIAEVQK.Y	1677.97	0		3
WP_009897862.1	pyruvate:ferredoxin (flavodoxin) oxidoreductase	pyruvate:ferredoxin			1.56	0.18	234
			K.AVFTEWLDSR.N	1250.63	1.56		2
			K.AVIEAEK.H	814.48	1.58		2
			K.DFILAQVR.Y	988.571	1.69		2
			K.DTTPSDIK.T	931.486	1.52		2
			K.ENAPMIIGGR.Y	1084.57	2.01		2
			K.FWGLGSDGTVGANK.Q	1463.74	1.57		2
			K.FYTVNAVK.L	996.564	1.64		2
			K.GDVMPANTVK.G	1086.57	1.47		2
			K.IVNMNYAAVDAGINALVK.V	1932.06	1.63		3
			K.LAEIIPEEDAVK.Y	1381.77	1.54		2
			K.LGQEIGLGNR.I	1083.6	1.71		2
			K.NPFTLDSK.E	976.523	1.44		2
			K.NPFTLDSKEPTASFK.D	1764.93	1.61		3
			K.QFPEEADGLFAK.A	1406.71	1.56		2
			K.TVFDNLVSEQPK.N	1431.76	1.43		2
			K.TVFDNLVSEQPK.N	1431.76	1.59		3
			K.VAGELLPGVFHVSAR.A	1578.89	1.46		2
			K.VAGELLPGVFHVSAR.A	1578.89	1.64		3
			K.VEVPASWENAVDADKGEVKEPEFIK.N	2898.51	1.4		4
			K.VVTQLYGDR.M	1077.58	1.56		2
			K.YAQAYFDYDSK.K	1425.65	1.48		2
			K.YAQAYFDYDSKK.S	1581.77	1.38		3
			K.YYQNIVGIVEK.Y	1380.77	1.69		2
			R.ATYLIDEADYIACHK.Q	1838.9	1.35		3
			R.DNALSPNHPVAR.G	1317.68	1.6		2
			R.DNALSPNHPVAR.G	1317.68	1.58		3
			R.GTAQNPDIYFQTR.E	1537.75	1.39		2
			R.INMIMQSAFFK.L	1384.72	1.72		2
			R.LPFIHFFDGFR.T	1422.74	0.96		3
			R.QTGCVLLASGSVQEVADIAPVAHLAAIEGR.L	3060.61	1.25		3
			R.TKEPGSTGEPLYLDVR.D	1816.96	1.4		2
			R.TKEPGSTGEPLYLDVR.D	1816.96	1.41		3
			R.TVANEAQAVACGYWHLYR.F	2137.02	1.26		3
			K.AEGKNPFTLDSK.E	1389.75	0		3
			K.ALVM(15.995)KPIDTQLDTELDNWAFAVNPDEVAPK.G	460.272	0		4
			K.ALVMKPIDTQLDTELDNWAFAVNPDEVAPK.G	3425.77	0		3
			K.ALVMKPIDTQLDTELDNWAFAVNPDEVAPK.G	3425.77	0		4
			K.ATPAAAMAK.F	886.495	0		2
			K.AVIEAEKHDGPSLIIAYAPCINHGLK.E	2900.57	0		5
			K.GDVM(15.995)PANTVK.G	448.199	0		2
			K.GGTFVLNTIWDQAGLEEHLPAHMK.Q	2720.38	0		4
			K.GPSWANSLFEDNAEYGFGM(15.995)YTAVK.Q	2119.9	0		3
			K.HFLDAMPSTVER.I	1429.7	0		2
			K.HFLDAMPSTVER.I	1429.7	0		3
			K.HSLFDYYGAEDAK.Y	1570.73	0		2
			K.HSLFDYYGAEDAK.Y	1570.73	0		3
			K.IVDAMTELVSM(15.995)DICEDAK.A	1235.61	0		3
			K.IVDAMTELVSMDICEDAK.A	2095.99	0		2
			K.IVDAMTELVSMDICEDAK.A	2095.99	0		3
			K.IVNM(15.995)NYAAVDAGINALVK.V	503.278	0		2
			K.IVNM(15.995)NYAAVDAGINALVK.V	503.278	0		3
			K.IVNMNYAAVDAGINALVK.V	1932.06	0		2
			K.KGGTFVLNTIWDQAGLEEHLPAHMK.Q	2876.51	0		5
			K.NGFTVGIVDDVTNTSLTPSEPIK.I	2460.28	0		2
			K.NGFTVGIVDDVTNTSLTPSEPIK.I	2460.28	0		3
			K.NILRPMTAQEGNNLPVSTFNGIEDGTFPCGTAAYEK.R	3969.92	0		3
			K.NPFTLDSKEPTASFK.D	1764.93	0		2
			K.QSYVYQYDLLK.G	1474.77	0		2
			K.SGGITMSHLR.F	1085.57	0		2
			K.YAQAYFDYDSKK.S	1581.77	0		2
			R.ALASQALSIFGDHQDVM(15.995)AAR.Q	1829.9	0		3
			R.ALASQALSIFGDHQDVMAAR.Q	2129.08	0		2
			R.ALASQALSIFGDHQDVMAAR.Q	2129.08	0		3
			R.ATYLIDEADYIACHK.Q	1838.9	0		2
			R.KHSLFDYYGAEDAK.Y	1726.86	0		2
			R.MMIANATGCSSIWGASAPSIPYTCNHEGK.G	3167.44	0		3
			R.MQLSPLDCTGCGNCADICPAK.E	2424.04	0		2
			R.MQLSPLDCTGCGNCADICPAK.E	2424.04	0		3
			R.QPLM(15.995)EFSGACAGCGETAYIK.V	515.278	0		3
			R.QPLMEFSGACAGCGETAYIK.V	2246.03	0		2
WP_009890721.1	threonine ammonia-lyase	threonine			1.57	0.06	2
			K.IVGVQTANIPSMK.E	1412.81	1.57		2
			K.IVSEGAGAVCTAAILSGK.Y	1758.95	1.6		2
			K.LSAGEALGK.Q	900.528	1.48		2
			K.ETGATFLHPFNDK.Y	1531.77	0		3
			K.IVSEGAGAVCTAAILSGK.Y	1758.95	0		3
			K.QSAEFILETIDYDHIAR.I	2049.02	0		3
			K.STIVMPATAPLAK.V	1354.79	0		2
			R.IISENGGNILSANQGK.L	1669.9	0		2
			R.IISENGGNILSANQGK.L	1669.9	0		3
WP_009896496.1	sulfide/dihydroorotate dehydrogenase-like FAD/NAD-binding protein	sulfide/dihydroorotate			1.57	0	3
			K.FACVDGPEFDGHLVDFDQAMR.R	2454.08	1.57		3
			K.ILFVAGGVGSAPVYPQVK.W	1858.08	0		2
			K.ILFVAGGVGSAPVYPQVK.W	1858.08	0		3
			K.NVYVSTDDGTYGFNGR.V	1791.81	0		2
			K.SSQPGQFIIIK.N	1272.74	0		2
			R.IPLTIADYDREK.G	1488.82	0		3
WP_009901573.1	adenylate kinase	adenylate			1.57	0.19	23
			K.GTQAAGIVEK.Y	1028.59	1.57		2
			K.VVNIEVDK.S	970.57	1.76		2
			R.NVAQGEHLDIFLK.N	1538.85	1.38		3
			K.AKEYMDQGLLVPDELTVGLVTDR.I	2618.37	0		3
			K.VFEDIVAALGSGK.-	1360.76	0		2
			K.YNIPHISTGDIFR.K	1559.81	0		3
			R.IILLGPPGAGK.G	1090.71	0		2
			R.IQVYLDETKPLVDYYSK.Q	2158.16	0		3
WP_003420701.1	phosphate butyryltransferase	phosphate			1.58	0.15	2
			K.IANAILVGDIEK.T	1310.78	1.69		2
			R.ADILLAPDIEGGNILYK.A	1871.05	1.48		2
			K.NAGVIVGAK.A	883.549	0		2
			K.SVELVSQGK.A	1001.58	0		2
			R.ADILLAPDIEGGNILYK.A	1871.05	0		3
			R.TGNVLSHVAVFDVEGYDR.L	2005.99	0		3
WP_003421155.1	50S ribosomal protein L14	50S			1.58	0	2
			K.IVSLAPEVL.-	967.595	1.58		2
			R.ELRDNEFMK.I	1236.62	0		3
			R.YGNIGDVIVATVK.S	1403.8	0		3
WP_003428474.1	FprA family A-type flavoprotein	FprA			1.58	0.16	23
			K.ANFKDEFLSNLSEVTDIAK.I	2225.17	1.67		3
			K.DGEILNIGK.R	1013.58	1.58		2
			K.VILLGSPTINK.T	1209.77	1.36		2
			K.AELYDLEDMTLTEMHDTLVVSK.V	2609.27	0		3
			K.HVLSAVDK.V	923.544	0		2
			K.KDIYFTGVVDEGLK.V	1666.92	0		2
			K.KDIYFTGVVDEGLK.V	1666.92	0		3
			K.MPVESLK.K	858.489	0		2
WP_009889364.1	tyrosine--tRNA ligase	tyrosine--tRNA			1.58	0	2
			K.ALTTEQVLANAK.T	1313.76	1.58		2
			K.GQIPEDIQTIQVK.E	1523.86	1.58		2
			K.ESELVVQIGK.K	1156.67	0		2
			K.SMEIPDELIIK.Y	1342.74	0		2
			K.TYEEQIFK.V	1112.58	0		2
			K.YYNLVTDVHPDEVNKIESQLK.E	2588.36	0		4
			R.EIVTLYHGEESAK.E	1530.79	0		3
			R.KALTTEQVLANAK.T	1469.88	0		3
WP_009891056.1	preprotein translocase subunit SecA	preprotein			1.58	0	2
			K.TEEGEFESIYK.L	1386.66	1.58		2
			K.AESFFGITNLTDIK.N	1610.86	0		2
			R.FFVSLEDDVIK.L	1366.74	0		2
WP_009901581.1	anaerobic ribonucleoside triphosphate reductase	anaerobic			1.58	0.22	2
			K.LSEQLTQEVIK.F	1342.77	1.57		2
			R.AIFLAATNVAER.E	1302.73	1.58		2
			R.GNISFTTVNLPR.L	1345.74	1.98		2
			R.ITGYLVGTVDR.F	1220.68	1.63		2
			R.VLSNVCGSETVSGR.G	1491.74	1.36		2
			R.AGAQVPFSSVNFGTDTSEEGR.M	2184.02	0		2
			R.GLGNGETPIFPILIFK.V	1772.03	0		2
WP_003416023.1	phosphate propanoyltransferase	phosphate			1.59	8.24	23
			K.APIKESGDIAGTPGVK.L	1622.92	1.84		3
			K.ESGDIAGTPGVK.L	1185.62	1.39		2
			K.LVGPAGEVEMK.E	1184.65	1.59		2
			R.ALVFENVLVR.A	1186.71	1.49		2
			R.HIHMSNEDAAK.F	1307.63	20		3
			-.MKLPIALSNK.H	1197.75	0		3
			K.FKPLSQPGQYACEEK.V	1865.94	0		3
WP_003424535.1	elongation factor Ts	elongation			1.59	0.15	2
			K.ALQEAEGNMEK.A	1274.62	1.45		2
			K.DVAMQVAAMNPK.Y	1329.68	1.7		2
			R.EENFAEEVAK.Q	1220.59	1.73		2
			R.FEVGEGIQK.R	1061.58	1.48		2
			-.MANITAQMVK.E	1161.62	0		2
			K.DAACMALATDKEDIASLLGETHK.E	2544.26	0		4
			K.EGITLQEVLNNR.V	1412.76	0		2
			K.EVCLLEQTFVK.N	1420.76	0		2
			K.KALQEAEGNMEK.A	1430.74	0		3
			K.REENFAEEVAK.Q	1376.69	0		3
			K.VVTNGQVAGYIHGGGK.I	1611.87	0		3
WP_003428889.1	carboxymuconolactone decarboxylase family protein	carboxymuconolactone			1.59	0	2
			K.IGVIGGGSITYPNAR.F	1501.83	1.59		2
			K.KLSETDEFFR.V	1326.68	0		2
WP_003438096.1	acetate kinase	acetate			1.59	0.36	23
			K.AILPDVPMVGVFDTAFHQTMPK.S	2470.28	2.2		3
			K.DAIALVLEAVAHPEFGAVK.E	2006.13	1.27		3
			K.MLLIPTNEELMIAR.D	1670.91	1.59		2
			R.ADIASNMEFLGMK.L	1481.73	1.67		2
			R.GKETVISTADSK.V	1318.73	1.37		2
			K.AILPDVPM(15.995)VGVFDTAFHQTMPK.S	882.489	0		3
			K.DAIALVLEAVAHPEFGAVK.E	2006.13	0		2
			K.EGLDADGLDK.L	1087.54	0		2
			K.ESGVYGM(15.995)TGISSDFR.D	769.332	0		2
			K.ESGVYGMTGISSDFRDIEDAAK.N	2404.13	0		3
			K.ILVLNCGSSSLK.Y	1345.76	0		2
			K.IVTCHLGNGASIAAVDGGK.C	1896	0		3
			K.SSYLYGLPHELYTK.Y	1726.9	0		3
			R.AQATLEAYVK.K	1148.64	0		2
WP_009895182.1	proline--tRNA ligase	proline--tRNA			1.59	0.45	234
			K.AFDITFADR.E	1082.54	3.15		2
			K.ALQSGTSHFLGQHFTK.A	1814.95	1.47		3
			K.ALQSGTSHFLGQHFTK.A	1814.95	1.58		4
			K.DIENNQAMVFR.R	1363.66	1.86		2
			K.GVAVEVDDRDNYTTGWK.F	1980.96	1.4		3
			K.MEDDFPQWYTDVITK.T	1943.91	1.81		2
			K.NCYFPLLIPESLLNK.E	1877.02	1.8		2
			K.QFVEEITK.M	1048.58	1.53		2
			K.TDLVDYAPVK.G	1175.64	1.6		2
			R.EGNLANPYHTSWGASTR.L	1888.89	1.53		3
			R.LIGGLIMTHSDNR.G	1453.77	1.87		2
			R.LIGGLIMTHSDNR.G	1453.77	1.85		3
			R.TYTIEAMMHDGK.A	1451.68	1.53		3
			R.VAPIQVVIVPIAAK.K	1472.97	1.3		2
			K.ALCEELLAMPVVAGQK.S	1783.96	0		2
			K.ALCEELLAMPVVAGQK.S	1783.96	0		3
			K.ALEEKPGFIK.T	1214.73	0		3
			K.DIENNQAM(15.995)VFR.R	961.418	0		2
			K.EAEHVEGFAPEVAWVTHGGNK.K	2320.13	0		4
			K.GFM(15.995)VVKPYGYALWEK.M	381.172	0		3
			K.GVAVEVDDRDNYTTGWK.F	1980.96	0		2
			K.KGNVMETVDK.I	1203.65	0		3
			K.TMWCGDAECEAK.I	1512.6	0		2
			R.EDNTSIVENMDEFRK.A	1881.88	0		3
			R.EGNLANPYHTSWGASTR.L	1888.89	0		2
			R.TYTIEAMMHDGK.A	1451.68	0		2
			R.VAPIQVVIVPIAAK.K	1472.97	0		3
WP_003422204.1	transcription elongation factor GreA	transcription			1.6	0	2
			K.EVVEVQVPDGVAK.F	1423.79	1.6		2
			K.IDLNVVTIGSIVK.V	1425.88	0		2
WP_003422749.1	D-alanine--poly(phosphoribitol) ligase subunit DltC	D-alanine--poly(phosphoribitol)			1.6	0	2
			R.LGIELQPTDLER.K	1410.77	1.6		2
			K.DMSTVNNLVK.F	1175.62	0		2
WP_004454939.1	isoleucine--tRNA ligase	isoleucine--tRNA			1.6	0.21	23
			K.LTEELINEGYAR.E	1434.74	1.75		2
			R.FWATELTEDKK.A	1450.77	1.45		3
			K.DLVLIGITAK.E	1097.71	0		2
			K.QQIEEYGIAEFNQK.C	1751.87	0		2
			K.VLGEDYEVLEEMK.G	1608.8	0		2
			R.GNTVNPMELFDQYGADALR.W	2139.01	0		2
WP_003420527.1	30S ribosomal protein S18	30S			1.61	0	2
			R.NIALLPYTLD.-	1159.65	1.61		2
			R.ELTVAIK.R	828.532	0		2
WP_003431138.1	ribulose-phosphate 3-epimerase	ribulose-phosphate			1.61	0	2
			K.AGVVLNPATPVDTIK.H	1549.91	1.61		2
			K.LAPSILSADFAK.L	1287.74	0		2
WP_003420710.1	MFS transporter	MFS			1.62	0.26	23
			K.NVEVEEVK.-	1000.54	1.52		2
			K.YFNCDTQEAAHGR.A	1595.68	2.01		3
			R.NAETQGYPIR.V	1175.59	1.62		2
			R.VSEMLATLTGAVFVER.V	1749.93	0		2
WP_003421135.1	50S ribosomal protein L15	50S			1.63	0	2
			R.VGFEGGQMPLAR.R	1288.66	1.63		2
WP_004454961.1	sugar ABC transporter substrate-binding protein	sugar			1.63	0	2
			K.SGTSDNYLYLDDAK.M	1616.76	1.63		2
			K.LVVWSAPLTDHDADAWKPIFEK.F	2622.39	0		4
			K.MMGGIYGLPIEAANPGVLYYNK.D	2427.24	0		3
WP_025992033.1	nucleotide exchange factor GrpE	nucleotide			1.63	0.21	2
			K.FGVEEIEAESK.E	1292.65	1.78		2
			K.IITELIPVIDSMER.A	1655.92	1.48		2
WP_003416871.1	glycine/sarcosine/betaine reductase component B subunit	glycine/sarcosine/betaine			1.64	0.13	23
			K.IEMQGVK.T	859.484	1.75		2
			K.TVIVTDEYAGR.D	1250.65	1.54		2
			K.VIGHLEVVDVIAGGSDGSLR.A	2021.1	1.54		3
			R.ADAVVTGGNANQVVVLPK.L	1807.02	1.78		3
			K.DINFVGVIITNENVYLADKER.S	2478.32	0		3
			K.VIGHLEVVDVIAGGSDGSLR.A	2021.1	0		2
			K.YLGLDAVIVSQEGFGNPDTDLIMNCK.K	2925.43	0		3
			R.ADAVVTGGNANQVVVLPK.L	1807.02	0		2
			R.ADGTIEVEIQAITGATNETGFGHLTAK.G	2800.43	0		3
			R.ADGTIEVEIQAITGATNETGFGHLTAK.G	2800.43	0		4
			R.DGGSQSLADADVR.A	1317.62	0		2
WP_003427763.1	(R)-2-hydroxyisocaproyl-CoA dehydratase subunit beta	(R)-2-hydroxyisocaproyl-CoA			1.64	4.72	23
			K.DIDGVIFCMMK.F	1383.66	1.34		2
			K.EVVENPNAAVK.K	1224.67	1.36		2
			K.FCDPEEYDYPLVR.K	1729.77	2.1		2
			K.HSNTIKPSIR.S	1207.7	2.41		2
			K.HSNTIKPSIR.S	1207.7	2.39		3
			K.IHESIEVYNEHR.K	1552.76	3.1		3
			K.LNAMPEEVCSGKK.V	1545.79	2.61		3
			K.VLLTGILADSK.D	1184.74	1.39		2
			K.YISLVHPQNR.K	1253.69	1.92		3
			R.DFVEVAYK.H	1025.54	20		2
			R.ELEEICGYEIEEAK.I	1766.83	1.6		2
			R.GSLIVDEVK.K	1014.6	1.34		2
			R.IQTFAEMMSLA.-	1268.61	1.64		2
			R.QWSNIEGCSLAYDPK.K	1822.86	1.03		2
			R.TDVPAGDDALER.L	1285.62	1.58		2
			K.IHESIEVYNEHR.K	1552.76	0		2
			K.IHESIEVYNEHRK.T	1708.89	0		3
			K.LNAMPEEVCSGK.K	1389.66	0		2
			K.MKEVVENPNAAVK.K	1511.84	0		2
			K.RELEEICGYEIEEAK.I	1923.93	0		3
WP_009897960.1	S-layer protein SlpA	S-layer			1.64	0.26	234
			A.DDTKVETGDQGYTVVQSK.Y	2054.02	1.91		3
			K.AFVVGGTGLADAMSIAPVASQLR.N	2259.21	1.52		2
			K.AFVVGGTGLADAMSIAPVASQLR.N	2259.21	1.46		3
			K.AGETTYSTGLTFEDGSTEK.I	2049.95	1.71		2
			K.AGETTYSTGLTFEDGSTEK.I	2049.95	1.7		3
			K.APLLLTSK.D	897.59	1.27		2
			K.ASIADENSPVK.L	1185.62	1.58		2
			K.AVEQLQK.G	870.518	1.73		2
			K.DGSTKEDQLVDALAAAPVAANFGVTLNSDGKPVDKDGK.V	3955.07	1.31		4
			K.DLKDYVDDLR.T	1306.68	1.58		2
			K.DYVDDLR.T	922.44	1.93		2
			K.EETIDIDASSSK.T	1349.66	1.56		2
			K.ESSYYQDNLNNDKK.V	1800.85	1.5		2
			K.ESSYYQDNLNNDKK.V	1800.85	1.62		3
			K.EVENELK.D	915.491	1.82		2
			K.EVENELKDMGLK.V	1487.79	2.39		2
			K.GIATSVINK.L	957.586	1.94		2
			K.GILDGSITEIK.V	1200.7	2.19		2
			K.IADEVGLDNDK.A	1243.63	1.79		2
			K.IADEVGLDNDKAFVVGGTGLADAMSIAPVASQLR.N	3457.8	1.31		3
			K.IADEVGLDNDKAFVVGGTGLADAMSIAPVASQLR.N	3457.8	1.64		4
			K.KAPLLLTSK.D	1053.72	1.7		2
			K.KVYLAGGVNSISK.E	1418.85	1.66		2
			K.KVYLAGGVNSISK.E	1418.85	1.83		3
			K.LAMSAIFDTAYTDSSETAVK.I	2177.06	1.56		2
			K.LLFTQVDNK.L	1132.65	1.97		2
			K.LTVVPGSK.A	855.543	1.99		2
			K.LVSPAPIVLATDSLSSDQSVSISK.V	2470.36	1.26		2
			K.LVSPAPIVLATDSLSSDQSVSISK.V	2470.36	1.42	2021-02-02	3
			K.MDLADGDATPIVVVDGK.A	1770.91	1.68		2
			K.MDLADGDATPIVVVDGK.A	1770.91	1.79		3
			K.TAQDLAK.K	801.46	1.48		2
			K.TINDDVKDFLDDSQVDIIGGENSVSK.D	2907.44	1.18		3
			K.TPSASVQPVITK.L	1282.75	1.66		2
			K.VETGDQGYTVVQSK.Y	1565.79	1.18		2
			K.VETGDQGYTVVQSK.Y	1565.79	1.24		3
			K.VFFEGTLASTIK.V	1367.77	1.89		2
			K.VGSELNAADASK.L	1216.63	1.95		2
			K.VLDKDNGENLVQVGK.G	1710.95	1.86		3
			K.VVNFFVAK.D	978.59	1.68		2
			K.VYLAGGVNSISK.E	1262.72	1.6		2
			K.YQVVLYPEGK.R	1250.69	1.64		2
			K.YYNSDDENAIFR.D	1533.67	1.89		2
			R.DSVDNVVLVGGNAIVDGLVASPLASEK.K	2694.45	1.43		2
			R.DSVDNVVLVGGNAIVDGLVASPLASEK.K	2694.45	1.37		3
			R.DSVDNVVLVGGNAIVDGLVASPLASEK.K	2694.45	1.64		4
			R.IETAIALSQK.Y	1128.68	1.28		2
			R.IINAKEETIDIDASSSK.T	1918.03	2.04		2
			R.IINAKEETIDIDASSSK.T	1918.03	1.95		3
			R.LAGDDRYETSLK.I	1422.74	1.55		2
			R.LAGDDRYETSLK.I	1422.74	1.59		3
			K.AFVVGGTGLADAM(15.995)SIAPVASQLR.N	1235.62	0		2
			K.AFVVGGTGLADAM(15.995)SIAPVASQLR.N	1235.62	0		3
			K.DLKDYVDDLR.T	1306.68	0		3
			K.DLTGASADAIIAGTSSADGVVTNTGAASGSTETNSAGTK.L	3582.72	0		3
			K.DLTGASADAIIAGTSSADGVVTNTGAASGSTETNSAGTK.L	3582.72	0		4
			K.DVENAIDDATGK.S	1302.63	0		2
			K.DVENAIDDATGKSPDR.Y	1757.84	0		2
			K.DVENAIDDATGKSPDR.Y	1757.84	0		3
			K.EDQLVDALAAAPVAANFGVTLNSDGKPVDKDGK.V	3437.81	0		4
			K.ESSYYQDNLNNDK.K	1644.73	0		2
			K.EVENELKDM(15.995)GLK.V	1161.56	0		2
			K.IADEVGLDNDKAFVVGGTGLADAM(15.995)SIAPVASQLR.N	2434.21	0		3
			K.IADEVGLDNDKAFVVGGTGLADAM(15.995)SIAPVASQLR.N	2434.21	0		4
			K.KDLKDYVDDLR.T	1462.8	0		3
			K.LAM(15.995)SAIFDTAYTDSSETAVK.I	361.204	0		2
			K.LAM(15.995)SAIFDTAYTDSSETAVK.I	361.204	0		3
			K.LAMSAIFDTAYTDSSETAVK.I	2177.06	0		3
			K.LDNLGDGDYVDFLITSPGQGDK.I	2395.16	0		2
			K.LDNLGDGDYVDFLITSPGQGDK.I	2395.16	0		3
			K.LGDSDIIDITK.A	1244.69	0		2
			K.LVSPAPIVLATDSLSSDQSVSISK.V	2470.36	0		4
			K.M(15.995)DLADGDATPIVVVDGK.A	177.082	0		2
			K.TDLNTLYK.V	1022.56	0		2
			K.TINDDVKDFLDDSQVDIIGGENSVSK.D	2907.44	0		4
			K.VFFEGTLASTIK.V	1367.77	0		3
			K.VLDKDNGENLVQVGK.G	1710.95	0		2
			K.VLNGDEADTNGLIEEVSGK.Y	2016.01	0		2
			K.VLNGDEADTNGLIEEVSGK.Y	2016.01	0		3
			R.NANGKM(15.995)DLADGDATPIVVVDGK.A	689.353	0		3
			R.TYNNGYSNAIEVAGEDR.I	1899.86	0		2
			R.TYNNGYSNAIEVAGEDRIETAIALSQK.Y	2983.5	0		3
			R.TYNNGYSNAIEVAGEDRIETAIALSQK.Y	2983.5	0		4
WP_003438917.1	hypothetical protein	hypothetical			1.65	0.14	23
			K.EINEQEDLSTSK.V	1447.7	1.47		2
			K.IQENVEDILAEAK.E	1526.82	1.5		2
			K.VKDSVLETTTK.I	1303.76	1.68		2
			K.VKDSVLETTTK.I	1303.76	1.8		3
			K.VNVVQDTLK.C	1070.63	1.65		2
WP_003420702.1	butyrate kinase	butyrate			1.66	0.12	23
			K.IAVFDNEDLVFEK.T	1593.83	1.62		2
			K.LVYEAMAYQISK.E	1470.78	1.71		2
			K.VGVLGEHASNLGGIIAK.Q	1689.98	1.78		3
			R.VLTGEEEAQVYDN.-	1493.69	1.5		2
			K.AILLTGGIAYSK.M	1261.76	0		2
			K.EIGASAAVLK.G	1013.61	0		2
			K.GGTYSVSAAMIEDLK.V	1596.81	0		2
			K.ILTINPGSTSTK.I	1286.74	0		2
			K.IVDVANALDGEGPFSPER.S	1913.96	0		2
			K.IVDVANALDGEGPFSPER.S	1913.96	0		3
			K.TSELDAVVGR.G	1073.57	0		2
			K.VSDQFEFR.K	1054.51	0		2
			R.HSSEEIGKYEK.V	1389.71	0		3
WP_003425341.1	glutamine-hydrolyzing GMP synthase	glutamine-hydrolyzing			1.66	0.16	23
			R.EADAVYMDELRK.A	1494.74	1.77		3
			R.IINEVDGVNR.V	1155.62	1.54		2
			K.AIGDNLTCIFVDHGLLR.K	1942.02	0		3
			K.GIIFTGGPNSAYLEDSPTISK.E	2223.15	0		2
			K.MDFLVQGTIYPDVIESGHGNAATIK.S	2732.39	0		3
			R.AVTSSDGMTSDWYK.M	1602.72	0		2
WP_009889023.1	elongation factor P	elongation			1.66	0	3
			K.TGAIREESFNPSEK.F	1619.82	1.66		3
			-.MVSAGDFR.K	909.438	0		2
			K.FLKENEVATIR.F	1374.79	0		3
			R.FYQGQPFQVEAPNFAELEVTDTEPGIK.G	3110.53	0		3
WP_003421188.1	50S ribosomal protein L1	50S			1.67	0.35	23
			K.EAEQAGADFVGAEELVQK.I	1946.97	1		2
			K.EAEQAGADFVGAEELVQK.I	1946.97	1.51		3
			K.FDETVEAHIK.L	1243.64	1.9		3
			K.FYDASEALTLVSDIAGAK.F	1927	1.68		2
			K.FYDASEALTLVSDIAGAK.F	1927	1.84		3
			K.LTENFTALMDAIIK.A	1634.9	1.56		2
			K.SGTVTFDVAK.A	1079.59	1.67		2
			R.SITVASSMGPGVK.I	1288.71	2.21		2
			K.AKEAEQAGADFVGAEELVQK.I	2174.13	0		2
			K.AKEAEQAGADFVGAEELVQK.I	2174.13	0		3
			K.GLMPNPK.S	811.463	0		2
WP_003422058.1	L-serine ammonia-lyase	L-serine			1.68	0.06	23
			K.IGSGPSSSHTMGPQR.A	1525.73	1.72		3
			R.AILYGSLAATGK.G	1219.72	1.64		2
			R.FKNENPDAESFR.A	1508.73	0		3
WP_003437537.1	YebC/PmpR family DNA-binding transcriptional regulator	YebC/PmpR			1.68	0.08	23
			K.AKADNMPNDNIDR.A	1528.73	1.69		3
			K.EGGADPEYNAALK.T	1389.68	1.71		2
			K.GYEFISADVK.M	1183.61	1.53		2
			K.MIPQTTTVLTEESHLK.M	1884.01	1.68		3
			K.M(15.995)IPQTTTVLTEESHLK.M	177.082	0		3
WP_003421180.1	30S ribosomal protein S7	30S			1.69	0.42	23
			K.AMDNIMPVLEVK.A	1414.76	2.21		2
			K.EIMDAANNTGASVK.K	1475.73	1.71		2
			K.REVLPDPMYGSK.V	1446.75	2.67		2
			K.REVLPDPMYGSK.V	1446.75	1.57		3
			K.TGEEALEVFNK.A	1291.67	1.49		2
			R.EVLPDPMYGSK.V	1290.65	1.7		2
			R.IVYDAFAIVAEK.T	1393.79	1.69		2
			R.VGGANYQVPIEVRPER.R	1810.97	1.47		3
			K.EIM(15.995)DAANNTGASVK.K	419.209	0		2
WP_003430084.1	toxic anion resistance protein	toxic			1.69	0	2
			R.NAQNVSTQSAQIAR.M	1514.78	1.69		2
			R.MAGTSSVQIETLEK.M	1548.81	0		2
WP_025992020.1	Nif3-like dinuclear metal center hexameric protein	Nif3-like			1.69	0.17	23
			K.FACMGMVDYFK.N	1423.63	1.46		2
			K.NLGLESEFLQGK.Y	1389.75	1.79		2
			K.VYTTTFPDKEIIK.Q	1637.93	1.69		3
			K.ALGLEIVKPFCK.Y	1457.87	0		3
			K.DGLVAIAAGGGSYPFVAR.E	1747.93	0		2
			K.DNLINVIGATHYSTEK.F	1829.95	0		3
			K.HFEPVLEFHQIAK.D	1649.89	0		3
			K.YIGLVLDNAQNINK.V	1629.91	0		2
WP_003428430.1	GNAT family N-acetyltransferase	GNAT			1.7	0	2
			K.ISLEEQENAIESAK.A	1615.83	1.7		2
WP_003428488.1	electron transport complex subunit RsxC	electron			1.7	0.36	3
			K.EAGIVGMGGATFPNHVK.V	1739.9	1.96		3
			K.EVPSGGLPIAAGAVVDNVATAAQIAK.S	2475.38	1.45		3
			K.AEVVILNGAECEPYLTADHR.L	2285.12	0		3
			K.GSSGILCLDEEESR.T	1578.72	0		2
WP_003435673.1	50S ribosomal protein L5	50S			1.7	0.11	23
			K.GVEELEMISGQKPVITK.A	1942.09	1.7		2
			K.GVEELEMISGQKPVITK.A	1942.09	1.92		3
			K.IVINMGIGDAR.E	1185.65	1.64		2
			K.LVSVSLPR.V	897.565	1.69		2
			R.GNYALGVK.E	876.507	1.71		2
			K.EQLIFPEIEYDKIDK.V	1964.06	0		3
			K.EVAPALMEK.F	1042.57	0		2
			K.LLGMPFSK.-	947.551	0		2
			K.MFYFMDK.L	1036.48	0		2
			R.GMDIIFVTTAK.T	1250.69	0		2
WP_009897956.1	cell wall-binding protein Cwp2	cell			1.71	0.19	23
			K.ATELTVESTNEK.D	1376.7	1.6		2
			K.EATELVSK.V	931.523	2.08		2
			K.IYIVGGESAVSNTAK.K	1563.85	1.61		2
			K.KAPILLASDNEIPK.V	1591.95	1.75		2
			K.KAPILLASDNEIPK.V	1591.95	1.94		3
			K.LVDGLAATPLAQSK.K	1438.84	1.67		2
			K.LVDGLAATPLAQSK.K	1438.84	1.6		3
			K.YTGGSQVGQPIYEIK.V	1694.89	1.95		2
			K.APIIVNGWNDLSADAIK.L	1853.01	0		2
			K.FTIKYTDASGKATELTVESTNEK.D	2645.39	0		3
			K.GEADAM(15.995)SIAAK.A	620.248	0		2
			K.GEADAMSIAAK.A	1118.56	0		2
			K.GHITNSANEVVAEATEK.Y	1824.92	0		3
			K.IITNIDELEK.L	1242.71	0		2
			K.LVNALGENK.E	1012.59	0		2
			K.NIDDVQLAEITIK.N	1526.86	0		2
			K.NSDLNTVSPQDLYDGYR.L	1984.92	0		2
			K.TIYVGIGDEK.V	1149.63	0		2
			K.VIETYYGK.L	1027.56	0		2
			K.VTLDYIKDIIK.K	1403.86	0		3
			K.YENSADLSAEANSITEK.A	1896.9	0		2
			K.YTDNIVIVNSNK.L	1434.77	0		2
			R.HMTSVAVAK.A	998.558	0		2
WP_003420711.1	2-oxoacid:acceptor oxidoreductase family protein	2-oxoacid:acceptor			1.72	0.72	23
			K.IIVNSSLIK.E	1041.68	1.72		2
			K.VSDTVDIESVLEAFK.K	1706.9	1.36		2
			K.VSDTVDIESVLEAFKK.V	1864.03	2.75		3
			K.EVSWLPSYGPEMR.G	1577.75	0		2
WP_003420907.1	co-chaperone GroES	co-chaperone			1.72	0.15	2
			K.IEGQEYTILR.Q	1248.67	1.82		2
			K.TASGIVLPGAAK.E	1139.69	1.61		2
			K.EQPQIAEVVEVGPGGIVEGK.E	2091.13	0		2
			R.QSDVLAVIE.-	1000.54	0		2
WP_009902759.1	hypothetical protein	hypothetical			1.72	0	2
			R.ALDAILEGGK.M	1041.61	1.72		2
WP_003420522.1	30S ribosomal protein S6	30S			1.73	12.92	3
			K.SAVDVPKEIDR.N	1283.71	20		3
			K.VKEVVATDGEIVK.V	1469.87	1.73		3
			R.NYELVYVVKPNSDEEVR.E	2109.08	0		2
			R.NYELVYVVKPNSDEEVR.E	2109.08	0		3
WP_009902534.1	DUF1002 domain-containing protein	DUF1002			1.73	0	2
			R.QYLQGVATEGQLGK.V	1546.84	1.73		2
WP_003421186.1	50S ribosomal protein L7/L12	50S			1.74	0.14	23
			K.EGASKEEADQIKEK.L	1672.89	1.98		3
			K.EVVDNAPK.T	926.507	1.74		2
			R.EITGLGLK.E	885.553	1.74		2
WP_003421173.1	50S ribosomal protein L3	50S			1.75	6.07	23
			K.GFQGPIKR.H	957.576	1.54		2
			K.GVVIPVTAVEAGPMVVTQIK.T	2064.21	1.53		2
			K.GVVIPVTAVEAGPMVVTQIK.T	2064.21	1.68		3
			K.IDVTGISK.G	887.533	20		2
			K.VDADKNLILVK.G	1310.82	2.31		2
			K.VGMTQIFTDK.G	1194.63	2.14		2
			K.VTVQNLEVVK.V	1183.72	1.75		2
			R.RPGSMGACSYPGR.V	1422.65	1.87		3
			R.VDSVEGYTVGQEIK.A	1578.81	1.62		2
			K.ADVFEAGAK.I	962.507	0		2
			K.GVVIPVTAVEAGPM(15.995)VVTQIK.T	1366.75	0		2
			K.TVDKDGYNAIQIGFEDAK.E	2068.06	0		2
			K.TVDKDGYNAIQIGFEDAK.E	2068.06	0		3
			K.TVDKDGYNAIQIGFEDAKEK.A	2353.22	0		3
			K.TVDKDGYNAIQIGFEDAKEK.A	2353.22	0		4
WP_009895216.1	preprotein translocase subunit SecA	preprotein			1.76	0	2
			R.GTDIVLGGNPDFLTK.R	1601.87	1.76		2
			K.AVSLTASGIQK.A	1129.67	0		2
			K.AVVDVENLSSPSDGTLPTSK.T	2072.07	0		2
			K.TLATVTFQNYFR.M	1487.78	0		2
			R.AVGQQDPVIAYK.M	1343.74	0		2
			R.KAVVDVENLSSPSDGTLPTSK.T	2228.2	0		3
			R.VQMIGGIVLHQGR.I	1434.81	0		3
WP_003419125.1	enoyl- enoyl-	enoyl-			1.77	0	2
			K.VQVITTGAGNPAK.Y	1310.76	1.77		2
			K.GSFMAGQSAAMVK.E	1339.66	0		2
			R.FATVDGDIEK.G	1149.59	0		2
			R.FICSEECSVHSNYK.N	1814.8	0		3
WP_003421137.1	50S ribosomal protein L30	50S			1.77	0.13	23
			R.EQVVVKEDNAQTR.G	1570.83	1.87		3
			R.SVIGTTPNQK.K	1099.62	1.68		2
WP_003424083.1	hypothetical protein	hypothetical			1.77	0.35	23
			K.ITLPETAIDTLK.S	1369.81	1.53		2
			K.SILKDNQDKPNNIR.V	1737.97	2.02		3
			R.VYFAGVGCGGPSFGLALDEK.K	2100.04	0		2
WP_009902397.1	Fe-S cluster assembly scaffold protein NifU	Fe-S			1.77	8.25	23
			K.AALIDYAQK.N	1047.6	1.62		2
			K.IFLDIDGDVIK.D	1302.74	1.08		2
			K.MHCSVLAEQAVK.A	1427.73	20		3
			K.TIKDALELTNK.A	1328.79	1.77		2
			K.TIKDALELTNK.A	1328.79	1.79		3
			K.AVAEALDGLPPVK.M	1334.78	0		2
			K.IFLDIDGDVIKDVK.F	1672.97	0		3
			K.TFGCGSAIASSSMATEMIK.G	2004.94	0		2
			R.NMGEIDNASGVGEVGNPTCGDIMK.I	2521.13	0		2
WP_003418513.1	rubrerythrin family protein	rubrerythrin			1.78	0	2
			K.NLMAGFAGESEAR.N	1379.65	1.78		2
			K.EGYNQIAAIFEETANNEKEHAK.L	2590.27	0		4
			K.IAYLFEAVGK.I	1165.67	0		2
			K.LLENLNEGK.I	1084.61	0		2
WP_003438030.1	nitroreductase family protein	nitroreductase			1.79	0.26	2
			K.LVPEIDVDVR.I	1181.67	1.6		2
			R.SEVFNNLDK.V	1120.58	1.97		2
			K.IVGYCNI.-	865.437	0		2
			K.KLVPEIDVDVR.I	1337.79	0		3
			K.LGINSDKEVTGIIAIGYGENVSNAK.V	2646.43	0		3
			K.VTELGIGSCWVTFEDGK.K	1953.96	0		2
			R.ALLDAFHYAR.L	1203.64	0		3
WP_003432442.1	3-methyl-2-oxobutanoate dehydrogenase subunit VorB	3-methyl-2-oxobutanoate			1.8	0.08	23
			K.IGGAFVQAESEVSAINMVYGGAGAGAR.V	2610.29	1.85		3
			K.IIAGELVAGGAR.-	1153.68	1.74		2
			K.SAIDILR.E	814.491	0		2
			K.SAIDILREEGIK.A	1398.81	0		3
			K.YFFGYPITPQSELPEYLSR.E	2335.16	0		2
			K.YFFGYPITPQSELPEYLSR.E	2335.16	0		3
			R.GGPGLGSIQPSQADYFM(15.995)STR.G	1751.82	0		2
			R.GGPGLGSIQPSQADYFMSTR.G	2097	0		2
			R.NILTVEMSMGQMVEDVK.M	1979.98	0		3
WP_009897948.1	cell wall-binding cysteine protease Cwp84	cell			1.8	0.16	23
			K.GYGTYDLSEEHLR.W	1566.73	1.69		3
			K.TLLTDTDNYAMK.S	1440.72	1.91		2
			K.GAIVVVIDNTANPNR.E	1579.87	0		2
			K.GFFWISYEDK.T	1346.65	0		2
			K.SSVAYNPMDLGLTTPAK.N	1819.94	0		2
			K.TSSGQATSGESLTGADRYETAVK.V	2372.15	0		3
			K.VTAANVFDFSR.D	1253.64	0		2
WP_032506644.1	nitronate monooxygenase	nitronate			1.8	10.54	23
			K.MAYINASEEDVHIVK.S	1773.9	1.69		3
			K.YIDMGASGVQVGTR.F	1480.73	1.8		2
			R.NIPVVAAGGITSSSDVK.K	1669.93	20		2
WP_003420839.1	redox-sensing transcriptional repressor Rex	redox-sensing			1.84	0	2
			K.GVWNFAPLDLEVPK.G	1639.9	1.84		2
WP_003434936.1	SEC-C domain-containing protein	SEC-C			1.84	0.08	23
			K.FWEEYLK.V	1069.55	1.91		2
			K.VEAGIYNEILNNK.M	1531.82	1.91		2
			R.NLSDNHESQEAEVK.F	1654.78	1.78		2
			R.NLSDNHESQEAEVK.F	1654.78	1.78		3
WP_004454985.1	ABC transporter substrate-binding protein	ABC			1.84	0.1	2
			K.ITLPTASESFLYGISK.I	1782.98	1.91		2
			K.NYALVAQQELK.K	1331.74	1.77		2
			K.DAKPSPAILFEDWSK.L	1787.95	0		3
			K.DAPIYTIDYEQNLMAAQK.N	2140.06	0		2
			K.DAPIYTIDYEQNLMAAQK.N	2140.06	0		3
			K.EDSLASNIVYAPLYTYEK.G	2132.08	0		2
			K.GNLVNYLAEK.V	1175.65	0		2
			K.ITLPTASESFLYGISK.I	1782.98	0		3
			K.NADYFGGEPK.A	1152.55	0		2
			R.GMFETGQYCNQTK.Y	1618.71	0		2
			R.LNYIVFNQNISNMANK.E	1939.01	0		2
			R.QALSYALNR.N	1062.58	0		2
WP_003420866.1	NAD-specific glutamate dehydrogenase	NAD-specific			1.85	0.5	23
[truncated: 593 more rows]

## Sheet: Average Ratios Probe 2
Group	VPI10463			630			protein class	enzyme class	Heavy:Light Ratio
									Average		Standard Deviation
	Accession	uniprot ID	symbol	Uniprot ID	symbol	description			Probe 2 (aryl)		Probe 2 (aryl)
									Enrichment	Competition	Enrichment	Competition
											n=4	n=4
high-reactivity targets: enrichment ratio ≥ 8 and competition ratio ≥ 2	WP_003418888.1	A0A031WJ47	acdA	Q18AQ1	bcd2	butyryl-CoA dehydrogenase	enzyme	oxidoreductase	20	1.9725	0	0.826977
	WP_003427762.1	A0A160W849	acdB	Q188I5	acdB	Acyl-CoA dehydrogenase, short-chain specific			7.855	2.0325	1.49732	1.36946
	WP_003438096.1	A0A031WGL1	ackA	Q18B36	ackA	Acetate kinase	enzyme	transferase	20	1.865	0	1.05762
	WP_009898069.1	A0A031WAU8	adhE	Q18D77	adhE	Aldehyde-alcohol dehydrogenase	enzyme	oxidoreductase	20	1.54	0	0.903143
	WP_003439524.1	A0A031WIK3	argG	Q186Z6	argG	Argininosuccinate synthase	enzyme	ligase	20	10.495		13.4421
	WP_003438357.1	A0A031WH88	aspB	Q18BK6	aspB	Aminotransferase	enzyme	transferase	20	4.0725		5.03739
	WP_004454140.1	A0A031WF33	aspS	Q183H4	aspS	Aspartate--tRNA ligase	enzyme	ligase	20	6.225		7.19128
	WP_003421367.1	A0A031WI77	atpA	Q180W8	atpA	ATP synthase subunit alpha	enzyme	translocase	20	1.9475	0	1.18077
	WP_003425850.1	A0A031WHJ3	atpD	Q180W5	atpD	ATP synthase subunit beta	enzyme	translocase	13.1833	2.31	3.97051	1.13405
	WP_004454390.1	A0A160X4Z4	bcrB	Q186V7	CD630_17490	Putative 2-hydroxyacyl-CoA dehydratase	enzyme	lyase	17.775	6.43	3.14663	9.06914
	WP_003438030.1	A0A031WG42	BN1095_450028	Q18AY4	CD630_11250	Nitroreductase-family protein	enzyme	oxidoreductase	17.53	1.6275	2.91541	0.962787
	WP_003430159.1	A0A031WIJ0	BN1095_470139	Q186Q2	CD630_16930	Putative dinitrogenase iron-molybdenum cofacto	other		16.86	5.6975	4.44063	5.9239
	WP_009888725.1	A0A031WGL8	BN1095_630017	Q18A87	CD630_08930	Putative iron-dependent hydrogenase	enzyme	oxidoreductase	20	6.3375	0	9.10971
	WP_003420702.1	A0A031WCI2	buk	Q18CK3	buk	Probable butyrate kinase	enzyme	transferase	20	13.64		11.0158
	WP_009889131.1	A0A031WFI6	cbf2	Q18BM5	CD630_13570	Peptidylprolyl isomerase	enzyme	isomerase	20	2.48	0	1.78675
	WP_004454042.1	A0A449MTZ8	cdgr_03985	Q17ZX7	CD630_32320	UPF0597 protein CD630_32320	unclassified		20	2.05	0	1.7557
	WP_009888019.1	A0A031WDM4	cooS	Q18CR1	cooS	Carbon monoxide dehydrogenase	enzyme	oxidoreductase	20	2.055	0	1.12135
	WP_003430934.1	A0A031WHV7	dnaK	Q182E8	dnaK	chaperone protein DnaK	channels, transporters, chaperones, and receptors		20	10.4375	0	11.0418
	WP_003436400.1	A0A450R375	E5F43_14400	Q186H7	CD630_16230	Putative oxidoreductase	enzyme	oxidoreductase	20	1.68	0	1.0804
	WP_009898301.1	A0A031WK46	eno	Q181T5	eno	Enolase	enzyme	lyase	14.905	1.7525	3.9234	0.679773
	WP_003424083.1	A0A031WES6	erpA	Q187Q3	CD630_19430	Uncharacterized protein	unclassified		20	1.64	0
	WP_003417347.1	A0A031WA87	etfA	Q188I8	etfA1	Alpha-subunit of electron transfer flavoprotein	enzyme	oxidoreductase	10.8675	1.9	4.34239	1.17175
	WP_003427760.1	A0A031W9Z3	etfB	Q188I4	etfB1	Beta-subunit of electron transfer flavoprotein	enzyme	oxidoreductase	9.765	2.045	4.85104	1.40581
	WP_009888867.1	A0A031WJM1	etfB	Q18AQ6	etfB3	Electron transfer flavoproteins subunit beta	channels, transporters, chaperones, and receptors		20	2.97
	WP_003438103.1	A0A031WGM3	fabF	Q18B43	fabF	3-oxoacyl-[acyl-carrier-protein] synthase 2	enzyme	transferase	20	2.39667		1.39908
	WP_003417352.1	A0A031WAY2	fba	Q188J1	fba	Fructose-1,6-bisphosphate aldolase	enzyme	lyase	8.225	1.7175	0.962687	0.949715
	WP_009902921.1	Q93QY9	flxD	Q187W1	flxD	flavodoxin	channels, transporters, chaperones, and receptors		20	20
	WP_003428474.1	A0A031WH65	fprA/norV	Q18B19	norV	Anaerobic nitric oxide reductase flavorubredoxin	enzyme	oxidoreductase	20	5.995	0	9.37797
	WP_003433890.1	A0A031WIP7	ftnA	Q185Y2	ftnA	Ferritin	enzyme	oxidoreductase	20	1.605		0.573672
	WP_003436178.1	A0A031WAZ7	fusA	Q18CF4	fusA	Elongation factor G	transcription factor and regulators		17.4825	1.54	5.035	0.63393
	WP_003421962.1	A0A031WJM9	gapA	Q181T9	gapA	Glyceraldehyde-3-phosphate dehydrogenase	enzyme	oxidoreductase	9.685	1.51	6.89901	0.842734
	WP_003436863.1	A0A6N3EL63	gapN	Q189C4	gapN	Glyceraldehyde-3-phosphate dehydrogenase (NADP(+)) (GADPH)	enzyme	oxidoreductase	20	10.305	0	13.7108
	WP_003432446.1	A0A031WEL3	glmS	Q18CK9	glmS	Glutamine--fructose-6-phosphate aminotransferase [isomerizing]	enzyme	transferase	20	2.2825	0	1.76039
	WP_003420866.1	P27346	gluD	Q18CS0	gluD	Glutamate dehydrogenase	enzyme	oxidoreductase	16.1375	2.0975	2.88789	1.2184
	WP_003416871.1	A0A031WJU5	grdE	Q185M5	GrdE	glycine reductase complex component B subunits alpha and beta (Selenoprotein PB alpha/beta)	enzyme	oxidoreductase	20	20	0	0
	WP_003423106.1	A0A031WJB8	guaB	Q185K9	guaB	Inositol-5'-monophosphate dehydrogenase (IMP dehydrogenase) (IMPDH) (IMPD)	enzyme	oxidoreductase	20	1.7325	0	1.02516
	WP_003427766.1	A0A031W9Y8	hadA	Q188I3	hadA	Isocaprenoyl-CoA:2-hydroxyisocaproate CoA-transferase	enzyme	transferase	11.9075	1.8925	3.2406	1.15312
	WP_009901809.1		hadB	Q188I1	hadB	Subunit of oxygen-sensitive 2-hydroxyisocaproyl-CoA dehydratase B	enzyme	hydrolase	15.5	1.9575	5.87592	0.91642
	WP_003427763.1	Q5U923	hadC	Q188I6	hadC	Subunit of oxygen-sensitive 2-hydroxyisocaproyl-CoA dehydratase C	enzyme	hydrolase	15.8625	1.915	4.78176	0.975175
	WP_009888223.1	A0A160W6B9	hadI	Q5U925	hadI	2-hydroxyisocaproyl-CoA dehydratase activator	enzyme	hydrolase	17.515	2.23	3.51432	1.25733
	WP_009903219.1		hisC_1	Q182I8	CD630_25020	Putative pyridoxal phosphate-dependent transferase	enzyme	transferase	20	20	0	0
	WP_004454939.1	A0A2A4BRI4	ileS	Q182V2	ileS	Isoleucine--tRNA ligase	enzyme	ligase	20	1.61333	0	1.06308
	WP_009896192.1	A0A160WY74	iscS_2	Q18BE4	iscS2	Cysteine desulfurase IscS	enzyme	transferase	20	1.58		1.02697
	WP_003431407.1	A0A031WAD6	ldhA	Q188H7	ldhA	D-lactate dehydrogenase	enzyme	oxidoreductase	16.935	1.995	3.57995	1.05459
	WP_003435867.1	A0A6N4MXQ7	metG	Q181D9	metG	Methionine--tRNA ligase	enzyme	ligase	20	10.9233		9.46652
	WP_009904144.1	A0A069AXL0	mreB	Q18B05	mreB2	od shape-determining protein MreB	other		20	1.58		0.608112
	WP_009902397.1		NifU (iscU)	Q18BE3	CD630_12800	Fe-s iron-sulfur cluster assembly protein, nifu family	adapter,scaffolding, modular proteins		18.8333	8.20667	2.02073	10.2756
	WP_009892576.1	A0A449S6H8	nroR	Q18CR6	CD630_01760	Putative oxidoreductase, NAD/FAD binding subunit	enzyme	oxidoreductase	20	5.9075		9.39864
	WP_003436882.1	A0A031WGH6	pepD	Q189Q4	pepD	Peptidase D, aminoacyl-histidine dipeptidase	enzyme	hydrolase	16.9167	1.545	2.8496	0.81226
	WP_003429565.1	A0A031WJX1	pgk	Q181T8	pgk	Phosphoglycerate kinase	enzyme	transferase	17.52	1.6725	3.50725	0.687817
	WP_009902143.1	A0A3T1G435	plfb	Q189V5	plfb	Formate acetyltransferase (Pyruvate formate-lyase)	enzyme	transferase	20	2.8225	0	2.09248
	WP_003438316.1	A0A031WFI5	pnp	Q18BI4	pnp	Polyribonucleotide nucleotidyltransferase	enzyme	transferase	20	1.695		0.883883
	WP_003432442.1	A0A031WDH6	porA_2	Q18CK8	CD630_01160	Putative ferredoxin/flavodoxin oxidoreductase,alpha subunit	enzyme	oxidoreductase	18.0733	2.01667	3.33708	0.856582
	WP_009897862.1	A0A160X9W3	porA_3/NifJ/pfo	Q183B6	pfo	Pyruvate-ferredoxin oxidoreductase	enzyme	oxidoreductase	16.89	1.8775	4.11866	0.701065
	WP_003420710.1	A0A031WCZ3	porB_2	Q18CK7	CD630_01170	Putative ferredoxin/flavodoxin oxidoreductase,beta subunit	enzyme	oxidoreductase	18.325	1.85	2.36881	0.838491
	WP_003420711.1	A0A031WCI5	porC_3	Q18CK6	CD630_01180	Putative ferredoxin/flavodoxin oxidoreductase,gamma subunit	enzyme	oxidoreductase	20	1.75333		0.422532
	WP_009901787.1	A0A160WT52	ppaC	Q18D73	ppaC	Putative inorganic pyrophosphatase	enzyme	hydrolase	20	1.7275	0	0.823868
	WP_003422104.1	A0A031WJF8	prdA	Q17ZY9	prdA	D-proline reductase proprotein	enzyme	oxidoreductase	20	2.1875	0	0.412906
	WP_003431873.1	A0A031WLJ3	prdC	Q17ZZ2	prdC	Putative electron transfer protein	enzyme	transferase	20	20		0
	WP_003422090.1	A0A031WLJ9	prdF	Q17ZY4	CD630_32370	Proline racemase	enzyme	isomerase	20	5.57	0	5.59596
	WP_009897922.1	A0A125V8V1	ptsI	Q183J1	ptsI	Phosphoenolpyruvate-protein phosphotransferase	enzyme	transferase	20	1.9875	0	1.50154
	WP_003418513.1	A0A069A775	rbr	Q18A24	rbr	Rubrerythrin	enzyme	oxidoreductase	20	3.945	0	2.40646
	WP_003421173.1	A0A031WA51	rplC	Q18CG0	rplC	50S ribosomal protein L3	other		18.115	1.5175	3.77	0.84065
	WP_003435673.1	A0A031WBT3	rplE	Q18CH2	rplE	50S ribosomal protein L5	other		15.82	1.5575	5.91141	0.571861
	WP_003421187.1	A0A031WA97	rplJ	Q18CE8	rplJ	50S ribosomal protein L10	other		16.41	1.735	5.07703	0.750844
	WP_003429485.1	A0A031WAF8	rpoB	Q18CF1	rpoB	DNA-directed RNA polymerase subunit beta	enzyme	transferase	20	6.4425		9.09525
	WP_003436174.1	A0A031WA07	rpoC	Q18CF3	rpoC	DNA-directed RNA polymerase subunit beta'	enzyme	transferase	20	1.9175	0	0.927303
	WP_003424537.1	A0A031WIT6	rpsB	Q185S8	rpsB	30S ribosomal protein S2	other		15.0225	1.5575	6.23657	0.666852
	WP_003421148.1	A0A031W9P0	rpsH	Q18CH0	rpsH	30S ribosomal protein S8	other		18.27	1.55	3.46	0.721203
	WP_003421125.1	A0A031WAM3	rpsM	Q18CI0	rpsM	30S ribosomal protein S13	other		10.155	1.89	13.9229	1.18794
	WP_003434936.1	A0A031WFG0	secA_2	Q181H5	CD630_35710	Uncharacterized protein	unclassified		20	1.81	0	0.760395
	WP_004454646.1	A0A031WJ42	sucD	Q185L7	sucD	Succinate-semialdehyde dehydrogenase (NAD(P)+)	enzyme	oxidoreductase	20	10.1875	0	11.3305
	WP_009890721.1	A0A031WHB0	tdcB	Q182J9	tdcB	Threonine dehydratase II	enzyme	lyase	20	13.4725	0	7.55988
	WP_003417090.1	A0A069AUG4	tig	Q180E9	tig	Trigger factor	enzyme	isomerase	20	1.88	0	1.18319
	WP_003430702.1	A0A031WIR0	tkt	Q185J5	tkt	Transketolase, central and C-terminal (Sedoheptulose-7-phosphate:D-glyceraldehyde-3-phosphate glycolaldehydetransferase)	enzyme	transferase	20	2.1125	0	1.38399
	WP_003434148.1	A0A031WLR9	tpiA/tpi	Q181T6	tpi	Triosephosphate isomerase	enzyme	isomerase	14.0975	1.745	4.81825	0.933042
	WP_003420374.1	A0A031WHY9	trxA	Q186P6	trxA	thioredoxin	enzyme	oxidoreductase	20	5.0125	0	4.3462
	WP_003430157.1	A0A031WHN3	trxB	Q186P9	trxB	Putative thioredoxin-disulfide reductase	enzyme	oxidoreductase	20	13.6867		10.935
	WP_003424535.1	A0A031WJ99	tsf	Q185S9	tsf	Elongation factor Ts	transcription factor and regulators		20	1.93		0.839881
	WP_009887863.1	A0A160W555	tuf_2/tuf1	Q18CE4	tuf1	Elongation factor Tu	transcription factor and regulators		10.99	1.605	4.32474	0.774618
	WP_009889364.1	A0A031WA86	tyrS	Q18C40	tyrS	Tyrosine--tRNA ligase	enzyme	ligase	20	2.95		2.89914
	WP_009901573.1			Q18CH9	adk	Adenylate kinase	enzyme	transferase	20	1.5775		0.670441
	WP_009901581.1			Q18CJ6	nrdD	anaerobic ribonucleoside triphosphate reductase	enzyme	oxidoreductase	20	2.715	0	2.05046
	WP_009903754.1			Q180R7	hemB	Delta-aminolevulinic acid dehydratase	enzyme	lyase	20	11.2833	0	9.01884
	WP_009903738.1			Q180P2	pyk	Pyruvate kinase	enzyme	transferase	20	1.6475	0	0.800141
	WP_004454864.1			Q182N7	CD630_25500	ABC-type transport system, sugar-family extracellular solute-binding protein	channels, transporters, chaperones, and receptors		20	10.54		13.3785
	WP_009902000.1			Q189B8	thrS	Threonine--tRNA ligase	enzyme	ligase	20	3.835		5.25627
reactive targets: enrichment ratio ≥ 8 or competition ratio ≥ 2	WP_004454985.1	A0A069AL86	appA	Q183A6	appA	ABC-type transport system, oligopeptide-family solute-binding protein	channels, transporters, chaperones, and receptors		20	1.26333	0	0.225019
	WP_003427105.1	A0A031WAR0	asnA	Q183C9	asnA	Aspartate--ammonia ligase	enzyme	ligase	20
	WP_003420706.1	A0A031WEK9	BN1095_210006	Q18CK1	CD630_01150	Putative 4Fe-4S ferredoxin, iron-sulfur binding domain protein, delta subunit	adapter, scaffolding, modulator proteins		20
	WP_003419074.1	A0A160WA21	cdgr_10610	Q18B18	CD630_11580	Putative radical SAM-superfamily protein	enzyme	lyase	20
	WP_003419624.1	A0A031WG62	cspA	Q18A83	cspA	Cold shock protein	other		8.96	1.17667		0.551755
	WP_009895184.1	A0A031WDD4	cysS	Q18CD5	cysS	Cysteine--tRNA ligase	enzyme	ligase	20	0.82
	WP_003428573.1	A0A031WK27	etfA	Q18AQ5	etfA3	Electron transfer flavoprotein subunit alpha	channels, transporters, chaperones, and receptors		20	1.29
	WP_009901692.1	A0A031WDG6	groL	Q18CT5	groL	60 kDa chaperonin	channels, transporters, chaperones, and receptors		20	1.49	0	1.01823
	WP_003420907.1	A0A031WEJ8	groS	Q18CT6	groS	10 kDa chaperonin	channels, transporters, chaperones, and receptors		20
	WP_003425341.1	A0A031WEK2	guaA	Q18CT8	guaA	GMP synthase [glutamine-hydrolyzing]	enzyme	ligase	20	1.28	0	0.52
	WP_003429271.1	A0A031WGG4	lysN	Q181R8	CD630_36640	Putative aminotransferase	enzyme	transferase	20	1.4925	0	0.567883
	WP_009897956.1	A0A487GC37	lytC_18	Q183M5	cwp2	Cell wall binding protein cwp2	adapter,scaffolding, modular proteins		20	1.17	0	0.393573
	WP_003418897.1	A0A031WJD8	mmgB/hbd	Q18AQ7	hbd	3-hydroxybutyryl-CoA dehydrogenase	enzyme	oxidoreductase	12.12	1
	WP_009897314.1	A0A031WIB6	msrAB/msrA	Q185V3	msrAB/msrA	Multifunctional fusion protein	enzyme	oxidoreductase	20	0.7
	WP_003438795.1	A0A6N2ZWP2	PDLFYP43_02025	Q17ZW3	CD630_32210	Putative peptidase, M20D family	enzyme	hydrolase	20	0.85	0
	WP_011861888.1	A0A500UG65	prdB	Q17ZY6	prdB	Proline reductase (Selenocysteine)	enzyme	oxidoreductase	15.65	1.4775		0.831319
	WP_009895182.1	A0A031WDK1	proS	Q18CD2	proS1	Proline--tRNA ligase 1	enzyme	ligase	18.2775	0.685	3.445	0.339657
	WP_003419930.1	A0A160WBD4	rbr3A_1	Q18BZ4	CD630_14740	Putative rubrerythrin (Rr)	enzyme	oxidoreductase	15.13	1.43	4.63614	0.767594
	WP_009889371.1	A0A031WCC0	rbr3A_2	Q18C45	CD630_15240	Putative rubrerythrin	enzyme	oxidoreductase	17.2725	1.4275	5.455	0.766697
	WP_003428488.1	A0A069AUQ9	rnfC	Q18AZ5	rnfC	Ion-translocating oxidoreductase complex subunit C	enzyme	translocase	20
	WP_003421188.1	A0A031WA03	rplA	Q18CE9	rplA	50S ribosomal protein L1	other		10.85	1.06	12.9401
	WP_003421107.1	A0A031WA25	rplM	Q18CJ1	rplM	50S ribosomal protein L13	other		11.535	1.425	11.9713	0.679093
	WP_003419082.1	A0A031WIC7	rplU	Q18B24	rplU	50S ribosomal protein L21	other		10.68	1.48	13.1805	0.918477
	WP_003421138.1	A0A031WBS9	rpsE	Q18CH3	rpsE	30S ribosomal protein S5	other		11.99
	WP_003420522.1	A0A031WGW1	rpsF	Q181R5	rpsF	30S ribosomal protein S6	other		20
	WP_003421180.1	A0A031WC55	rpsG	Q18CF5	rpsG	30S ribosomal protein S7	other		13.705	1.47	8.62671	0.676511
	WP_003416451.1	A0A031WH02	yabJ	Q182K0	CD630_25130	Putative translation inhibitor endoribonuclease	unclassified		13.84	1.38	0.678823	0.900666
	WP_009902521.1			Q18BY9	cwp20	Putative cell surface protein putative penicillin-binding protein cwp20	adapter, scaffolding, modulator proteins		20	0.77	0
	WP_009903195.1			Q182B8	glyS	Glycine--tRNA ligase beta subunit	enzyme	ligase	20	1.37		0.622254
	WP_009903471.1			Q184T6	CD630_30990	Peptidase M20 domain-containing protein 2	enzyme	hydrolase	20
	WP_025992020.1			Q189L6	CD630_06720	GTP cyclohydrolase 1 type 2 homolog	unclassified		20	1.41333	0	0.924626
	WP_003435334.1	A0A031WEA4	accC	Q187P8	accC	Biotin carboxylase	enzyme	ligase		20
	WP_003434815.1	A0A125VAJ3	adhE_2	Q184F6	adhE1	Aldehyde-alcohol dehydrogenase	enzyme	oxidoreductase		1.5275		0.796257
	WP_009889064.1	A0A031WD86	alaS	Q18BE7	alaS	Alanine--tRNA ligase	enzyme	ligase		6.845		6.99329
	WP_003436885.1	A0A031WFU6	argS	Q189Q7	argS	Arginine--tRNA ligase	enzyme	ligase		20
	WP_003430444.1	A0A031WKP7	asnC	Q185B5	asnC	Asparagine--tRNA ligase	enzyme	ligase		4.44
	WP_003424103.1	A0A031WE94	BN1095_310042	Q187R2	CD630_19530	F420_ligase domain-containing protein	enzyme	ligase		1.87667		0.578475
	WP_003438917.1	A0A031WDP1	BN1095_480039	Q18A06	CD630_08070	Uncharacterized protein	unclassified			13.48		11.293
	WP_009890640.1	A0A031WGT6	BN1096_520272	Q182C1	CD630_24340	DUF4342 domain-containing protein	adapter,scaffolding, modular proteins			13.0867		7.74932
	WP_003437561.1	A0A346WRW8	cdgr_06650	Q189E0	CD630_05920	Uncharacterized protein	unclassified			6.415		7.6014
	WP_009903701.1	A0A381KK09	csdB_2	Q180C6	pflD	Pyruvate formate-lyase	enzyme	lyase		2.16		1.14817
	WP_003418660.1	A0A031WFD5	cspD/cspB/cspA	Q18BL9	cspB	Cold shock protein CspB	transcription factor and regulators			2.025		1.15258
	WP_003422063.1	A0A031WJH1	dapA/dapA3	Q17ZX0	dapA	4-hydroxy-tetrahydrodipicolinate synthase	enzyme	lyase		2.09
	WP_003439345.1	A0A031WB55	deoC	Q18C22	deoC	Deoxyribose-phosphate aldolase	enzyme	lyase		11.52
	WP_009897501.1	A0A7G7NJJ1	DSM105001_02571	Q185J2	CD630_23180	Putative phosphohexomutase	enzyme	isomerase		20
	WP_003439110.1	A0A161KPQ0	E5F32_11340	Q188Y6	CD630_05440	Putative ornithine cyclodeaminase	enzyme	lyase		2.05
	WP_003434191.1	A0A346WRC5	E5F43_11720	Q18D70	ppiB	Peptidyl-prolyl cis-trans isomerase	enzyme	isomerase		2.1		1.0938
	WP_003438099.1	A0A031WGL7	fabH	Q18B40	fabH	3-oxoacyl-[acyl-carrier-protein] synthase 3	enzyme	transferase		20
	WP_009888533.1	A0A031WFV7	fhs	Q189R2	fhs	Formate--tetrahydrofolate ligase	enzyme	ligase		1.5		0.452548
	WP_003422953.1	A0A069AKK1	glyA	Q183G0	glyA	Serine hydroxymethyltransferase	enzyme	transferase		2.05		0.800083
	WP_011860916.1	A0A500WW32	infC	Q189N1	infC	Translation initiation factor IF-3	transcription factor and regulators			1.6
	WP_009889571.1	A0A069A9M6	iunH	Q186N9	iunH	Putative nucleoside hydrolase, IUNH family	enzyme	hydrolase		2.49		1.68291
	WP_004454961.1	A0A031WB31	malE	Q182Y0	CD630_26450	ABC-type transport system, sugar-family extracellular solute-binding protein	channels, transporters, chaperones, and receptors			2.97
	WP_003432462.1	A0A031WEM0	metK	Q18CL7	metK	S-adenosylmethionine synthase	enzyme	transferase		1.98667		1.12926
	WP_003430209.1	A0A031WHU8	mrp	Q186T9	CD630_17300	Iron-sulfur cluster carrier protein	enzyme	hydrolase		2.06
	WP_009897829.1	A0A160XAJ4	murF	Q182Y9	murF	UDP-N-acetylmuramoyl-tripeptide--D-alanyl-D-alanine ligase	enzyme	ligase		1.58
	WP_003437525.1	A0A031WD51	ndx1_1	Q189Y6	CD630_07900	Putative hydrolase, NUDIX family	enzyme	hydrolase		20
	WP_003416023.1	A0A069A1Z7	pduL_1/pduL/pduL_2	Q183B8	CD630_26830	Phosphate propanoyltransferase	enzyme	transferase		3.74		5.02605
	WP_003435635.1	A0A3T1GFQ9	pgi	Q180C9	pgi	Glucose-6-phosphate isomerase	enzyme	isomerase		1.685		0.82002
	WP_003421448.1	A0A031WIC4	prs	Q181B3	prs	Ribose-phosphate pyrophosphokinase	enzyme	transferase		1.79667		0.479618
	WP_003420701.1	A0A031WCY9	ptb	Q18CK4	ptb	Phosphate butyryltransferase	enzyme	transferase		3.67
	WP_003428486.1	A0A031WH48	rnfB	Q18B01	rnfB	Ion-translocating oxidoreductase complex subunit B	enzyme	translocase		1.67
	WP_009887887.1	A0A031WAP2	rplD	Q18CF9	rplD	50S ribosomal protein L4	other		3.43	1.505		0.794334
	WP_003429267.1	A0A031WI13	rplI	Q181R0	rplI	50S ribosomal protein L9	other			1.795		1.11016
	WP_003421186.1	A0A031WC51	rplL	Q18CE7	rplL	50S ribosomal protein L7/L12	other			2.4		0.62554
	WP_003421158.1	A0A031W9Y6	rpmC	Q18CG9	rpmC	50S ribosomal protein L29	other			6.405		7.24784
	WP_003427733.1	A0A031W9M8	rpoA	Q18CI5	rpoA	DNA-directed RNA polymerase subunit alpha	enzyme	transferase		1.615		0.702638
	WP_003421121.1	A0A031W9W6	rpsD	Q18CI6	rpsD	30S ribosomal protein S4	other		5.385	1.61	2.86378	0.760833
	WP_003421122.1	A0A031WBS4	rpsK	Q18CI7	rpsK	30S ribosomal protein S11	other			1.69667		0.98845
	WP_003422058.1	A0A161KSB2	sdaB	Q17ZW7	sdaB	L-serine dehydratase	enzyme	lyase		1.68		0.650538
	WP_009895216.1	A0A031WCK4	secA	Q18CN0	secA1	Protein translocase subunit SecA 1	enzyme	translocase		20
	WP_009891056.1	A0A0H3NEM5	secA2	Q183M9	secA2	Protein translocase subunit SecA 2	enzyme	translocase		20
	WP_009897960.1	Q9AEM3	slpA	Q183M8	slpA	Precursor of the S-layer proteins	other		7.2625	1.5075	0.894143	0.731727
	WP_003418655.1	A0A031WHS9	speH	Q18A81	speH	S-adenosylmethionine decarboxylase proenzyme	enzyme	lyase		20		0
	WP_003421197.1	A0A069ASQ1	thyX	Q18CE1	thyX	Flavin-dependent thymidylate synthase	enzyme	transferase		2.07		1.30108
	WP_003430704.1	A0A031WJ19	tkt	Q185J6	tkt1	Transketolase, N-terminal (Sedoheptulose-7-phosphate:D-glyceraldehyde-3-phosphate glycolaldehydetransferase)	enzyme	transferase		8.03667		5.89885
	WP_003416870.1	A0A031WJD4	trxA/trxA2	Q185M8	trxA2	Thioredoxin	enzyme	oxidoreductase		20
	WP_003434033.1	A0A031WI80	trxB	Q185Q5	trxB2	thioredoxin reductase	enzyme	oxidoreductase		20
	WP_003426456.1	A0A069AGH3	ydeM	Q183I6	CD630_27490	Putative radical SAM-family protein	enzyme	oxidoreductase		1.61
	WP_003429004.1	A0A031WJ38	yheS_5	Q188D7	CD630_20680	ABC-type transport system, ATP-binding protein	enzyme	hydrolase		1.71		1.03238
	WP_025992040.1			Q181T7	gpmI	2,3-bisphosphoglycerate-independent phosphoglycerate mutase	enzyme	isomerase		10.495		13.4421
	WP_009903275.1			Q182U6	CD630_26130	Putative peptidase, M24 family	enzyme	hydrolase	1.28	2.065		1.31305
	WP_009903252.1			Q182N4	CD630_25470	DUF4091 domain-containing protein	adapter,scaffolding, modular proteins			7.14		8.62705
	WP_009901585.1			Q18CL0	glmM	Phosphoglucosamine mutase	enzyme	isomerase	0.26	1.59
	WP_009901578.1			Q18CJ7	aspC	Aminotransferase	enzyme	transferase		7.81667		10.5802
	WP_009902717.1			Q186P0	CD630_16840	Putative radical SAM superfamily protein	enzyme	lyase		2.145		0.615183
	WP_009903412.1			Q184L7	CD630_30280	Putative phosphosugar isomerase	enzyme	isomerase		1.65		0.44643
	WP_009903676.1			Q180A1	valS	Valine--tRNA ligase	enzyme	ligase		2.29667		1.24134
	WP_003428740.1	A0A069AT81	accB	Q187Q0	accB	Biotin carboxyl carrier protein of acetyl-CoA carboxylase			1.1975	1.0625	0.486715	0.162763
	WP_003439443.1	A0A069AGX4	bcp	Q187D3	bcp	Putative thiol peroxidase				0.64
	WP_003417102.1	A0A031WCE1	clpP	Q180F0	clpP	ATP-dependent Clp protease proteolytic subunit				0.84
	WP_003417105.1	A0A031WCN0	clpX	Q180E8	clpX	ATP-dependent Clp protease ATP-binding subunit ClpX				1.23		0.39598
	WP_003438268.1	A0A031WD25	codY	Q18BE1	codY	GTP-sensing transcriptional pleiotropic repressor CodY				1.02
	WP_009897952.1	A0A125V9F8	cwp66	Q183M7	cwp66	Cell surface protein cwp66				0.64
	WP_009897948.1	A0A125V8W5	cwp84	Q183M1	cwp84	Cell surface protein cwp84				0.975		0.417193
	WP_003438808.1	A0A031WJY6	dapB/dapB1	Q17ZX1	dapB1	4-hydroxy-tetrahydrodipicolinate reductase				0.8
	WP_003438324.1	A0A031WHA0	dapG	Q18BI5	dapG	Aspartokinase				1.29
	WP_003428889.1	A0A1Q9BMW3	E5F32_14780	Q187V4	CD630_19930	Putative decarboxylase				1.35
	WP_009890867.1	A0A657JUJ4	ftsZ	Q182X9	ftsZ	Cell division protein FtsZ				1.47		0.240416
	WP_003420072.1	A0A160WCH6	gltD/aspB_1	Q18C58	aspB1	Putative glutamate synthase				1.3175		0.109659
	WP_003435581.1	A0A031WF58	gltX	Q18CD6	gltX	Glutamate--tRNA ligase				0.99
	WP_003435963.1	A0A3T1G4L5	htpG	Q18D10	htpG	Heat shock protein 90 (Heat shock protein HtpG)(High temperature protein G)				1
	WP_003434417.1	A0A031WD18	lrtA/hpf	Q18CN1	hpf	Ribosome hibernation promoting factor				1.06667		0.652482
	WP_003434963.1	A0A069AN77	lysS	Q181F2	lysS	Lysine--tRNA ligase				1.11
	WP_009888868.1	A0A031WJ40	mmgA/thlA	Q18AR0	thlA	Acetyl-CoA acetyltransferase				1.435		0.327058
	WP_003429132.1	A0A031WC37	pfkA	Q180P4	pfkA	ATP-dependent 6-phosphofructokinase				1.35		0.353553
	WP_003439900.1	A0A2A3K3G5	pip	Q184M8	pip	Proline iminopeptidase				1.275		0.586899
	WP_003437537.1	A0A031WED6	pmpR	Q189Y9	CD630_07950	Probable transcriptional regulatory protein CD630_07950				1.45		0.687241
	WP_009895180.1	A0A031WE17	proS	Q18CD7	proS2	Proline--tRNA ligase 2				1.02		0.0848528
	WP_003425597.1	A0A069AHU3	pycA	Q18CA4	pycA	Pyruvate carboxylase			1.075	1.25	0.2504	0.314006
	WP_011861169.1	A0A069A9S9	rnjA	Q18BF6	rnj	Ribonuclease J				1.25
	WP_003431138.1	A0A031WAQ2	rpe/rpe1	Q182R3	rpe1	Ribulose-phosphate 3-epimerase				1.1
	WP_003421168.1	A0A031W9Z1	rplB	Q18CG3	rplB	50S ribosomal protein L2			1.3225	1.25	0.325103	0.41336
	WP_003421155.1	A0A031WA45	rplN	Q18CG7	rplN	50S ribosomal protein L14				1.3		0.474412
	WP_003421160.1	A0A031WBT7	rplP	Q18CG4	rplP	50S ribosomal protein L16			1.1	1.365		0.47585
	WP_003421117.1	A0A031WA29	rplQ	Q18CI8	rplQ	50S ribosomal protein L17				0.945		0.162635
	WP_003419350.1	A0A031WDB1	rplS	Q18BC1	rplS	50S ribosomal protein L19				0.68
	WP_003429730.1	A0A160W8Z0	rplT	Q189N4	rplT	50S ribosomal protein L20			1.0075	1.2575	0.260688	0.546832
	WP_009887891.1	A0A031WA47	rplV	Q18CG1	rplV	50S ribosomal protein L22				1.295		0.53033
	WP_003427723.1	A0A031WAN4	rplX	Q18CG6	rplX	50S ribosomal protein L24				1.295		0.33234
	WP_003429729.1	A0A031WFF6	rpmI	Q189N0	rpmI	50S ribosomal protein L35			0.82		0.622254
	WP_003421163.1	A0A069A3T9	rpsC	Q18CG5	rpsC	30S ribosomal protein S3			2.34	1.42	0.734847	0.570789
	WP_003421175.1	A0A069APE8	rpsJ	Q18CF6	rpsJ	ribosomal protein S10				1.37333		0.289194
	WP_003436176.1	A0A069AMB0	rpsL	Q18CF2	rpsL	30S ribosomal protein S12			1.235	1.43	1.37886	0.296985
	WP_003421156.1	A0A031W9P1	rpsQ	Q18CG8	rpsQ	30S ribosomal protein S17				0.89
	WP_003421166.1	A0A031W9P7	rpsS	Q18CG2	rpsS	30S ribosomal protein S19				0.83
	WP_003416416.1	A0A031WHJ5	rsfS	Q182L0	rsfS	Ribosomal silencing factor RsfS				1.15
	WP_003435562.1	A0A031WFN9	serS	Q18C97	serS	Serine--tRNA ligase				0.71
	WP_009888722.1	A0A031WFZ5	speE	Q18A85	speE	Polyamine aminopropyltransferase				1.34
	WP_004454662.1	A0A069ALV0	tauA	Q185N5	CD630_23650	ABC-type transport system,nitrate/sulfonate/taurine extracellular solute-binding protein				1.36
	WP_003437840.1	A0A031WJE6	upp	Q180X8	upp	Uracil phosphoribosyltransferase				1.01
	WP_003430084.1	A0A031WHM2	yceH	Q186J3	CD630_16390	Putative tellurite associated resistance protein				1.12
	WP_009892314.1	A0A160WLW5	yedF	Q181S1	CD630_36670/yedF	Selenium metabolism protein yedf				1.28
	WP_009902261.1			Q18AS5	CD630_10720	M18 family aminopeptidase				1.21
	WP_009903399.1			Q184K9	CD630_30180	Oxidoreductase				1.155		0.106066
	WP_025992033.1			Q182F1	grpE	Protein GrpE				0.79

## Sheet: Probe 2_enrichment
Replicate 1 : probe 2–C. difficile–enrichment
Accession	description	symbol	sequence	mass	median ratio	standard deviation	charge
WP_003428740.1	acetyl-CoA carboxylase biotin carboxyl carrier protein	acetyl-CoA			0.89	0.31	23
			-.MNINEIKELLK.A	1427.84	0.89		2
			-.MNINEIKELLK.A	1427.84	0.97		3
			K.AIDSTNLEYVK.L	1307.7	0.88		2
			K.AIDSTNLEYVKLESSDLR.L	2109.1	1.55		3
			K.GEIIEVLVSNEELVEYNQPLFK.I	2618.39	0.78		3
			-.MNINEIK.E	916.505	0		2
			K.AIDSTNLEYVK.L	1307.7	0		3
			K.KAQSTSSPVLSVQQESVVDLSLEK.P	2643.44	0		3
			L.MGTFYDSPSPDADSFVK.V	1919.87	0		2
			M.GTFYDSPSPDADSFVK.V	1787.83	0		2
WP_003421168.1	50S ribosomal protein L2	50S			1.15	0.17	234
			K.ATIGQVGNIEHGNVVIGK.A	1862.05	1.03		2
			K.ATIGQVGNIEHGNVVIGK.A	1862.05	1.12		3
			R.GSVMNPNDHPHGGGEGR.S	1744.77	1.48		2
			R.GSVMNPNDHPHGGGEGR.S	1744.77	1.15		3
			R.GSVMNPNDHPHGGGEGR.S	1744.77	1.17		4
			K.DM(15.995)PVGTIIHNIELKPGK.G	292.109	0		4
			K.DMPVGTIIHNIELKPGK.G	1946.11	0		4
			K.VATIEYDPNR.T	1204.61	0		2
			R.QMTVLVSDEITCNQPEK.S	2048	0		2
			R.SAGVSAQLM(15.995)AK.E	890.453	0		2
			R.SAGVSAQLMAK.E	1117.62	0		2
			R.SPIGRPSPVTPWGKPALGYK.T	2192.26	0		4
			R.TANIALLNYADGEKR.Y	1703.92	0		2
WP_003425597.1	pyruvate carboxylase	pyruvate			1.18	0.24	234
			K.ADESYLIGEGK.G	1236.62	1.04		2
			K.ADMNDPLQIGASIPGK.V	1681.87	1.1		2
			K.ADMNDPLQIGASIPGK.V	1681.87	1.21		3
			K.AFGEDIIFIEK.Y	1336.73	1.19		2
			K.DMSGLLKPYSAYTLVK.E	1870.04	1.31		2
			K.DMSGLLKPYSAYTLVK.E	1870.04	1.29		3
			K.EANEVVGDIIK.V	1241.69	0.99		2
			K.EICEDAVK.L	1018.5	1.19		2
			K.EKPLFDALHDPR.M	1492.8	1.32		2
			K.EKPLFDALHDPR.M	1492.8	1.27		3
			K.EKYKEANEVVGDIIK.V	1847.05	1.07		3
			K.EVNVQTIPGVEK.A	1367.77	1.19		2
			K.EVNVQTIPGVEK.A	1367.77	1.35		3
			K.FIDENPDLFEITESK.D	1852.92	0.88		2
			K.FIDENPDLFEITESKDR.G	2124.05	1.1		2
			K.FIDENPDLFEITESKDR.G	2124.05	1.19		3
			K.GEEAITVRPGSLLPAEDFDEIAK.Y	2513.31	0.99		3
			K.GMIGQPEGGIPK.D	1238.67	1.26		2
			K.IIEYAPAFSLDDK.V	1536.81	1.09		2
			K.IMVKEEDEVK.A	1302.71	0.86		2
			K.INNVEKADMNDPLQIGASIPGK.V	2408.28	1.41		3
			K.IVEATMCYTGDILDK.T	1783.87	1.07		2
			K.IVEATMCYTGDILDKTK.T	2042.05	1.52		3
			K.KLLLTDTTMR.D	1246.73	1.23		3
			K.KVDAIHPGYGFLAENAEFAR.K	2261.17	1.04		4
			K.LESDVFFYGLNK.N	1486.77	1.61		2
			K.LESDVFFYGLNKNEECEVEIEEGK.V	2961.4	0.97		3
			K.LLLTDTTMR.D	1090.61	1.25		2
			K.LLQFIGDVIVNDNACK.E	1875	1.28		2
			K.LLQFIGDVIVNDNACK.E	1875	1.43		3
			K.MAQELESLGADIIAIK.D	1756.96	1.62		2
			K.MAQELESLGADIIAIK.D	1756.96	1.67		3
			K.NEECEVEIEEGK.V	1519.67	0.89		2
			K.NLSFPDSVVDYCK.G	1598.77	0.98		2
			K.NYPDNVIEEFTK.E	1523.75	1.04		2
			K.QLLMIMK.-	931.56	1.02		2
			K.SQDDVEIR.G	988.482	0.82		2
			K.TKYNLEYYIK.M	1417.79	1.18		2
			K.TKYNLEYYIK.M	1417.79	1.35		3
			K.VDAIHPGYGFLAENAEFAR.K	2105.04	0.99		2
			K.VKEDDMVEDK.Q	1290.64	0.99		2
			K.VKEDDMVEDK.Q	1290.64	1		3
			K.VVGDLAIFMTK.N	1248.72	1.22		2
			K.VYEDYIK.H	984.517	1.25		2
			K.YDINANIR.N	1005.52	1.04		2
			K.YKEANEVVGDIIK.V	1560.88	0.91		2
			K.YKEANEVVGDIIK.V	1560.88	0.95		3
			K.YLNEKYDINANIR.N	1680.88	1.27		2
			K.YNLEYYIK.M	1160.61	1.21		2
			R.DTGIDLFGYDELGK.Y	1597.79	1.07		2
			R.DTGIDLFGYDELGK.Y	1597.79	1.05		3
			R.EVEIKDKNFSGK.I	1504.85	1.27		3
			R.IVHREEDLELEYETACSESR.K	2493.15	0.18		3
			R.KCEENGITFIGPSSK.V	1749.9	0.88		2
			R.KCEENGITFIGPSSK.V	1749.9	0.93		3
			R.KKVDAIHPGYGFLAENAEFAR.K	2417.29	1.71		3
			R.KKVDAIHPGYGFLAENAEFAR.K	2417.29	1.21		4
			R.LDGGNGFTGANISPHYDSLLVK.T	2331.19	1.03		3
			R.LVEIGEVK.E	941.58	1.17		2
			R.NVISYALYPK.V	1222.7	0.99		2
			R.QGIDVFR.I	861.471	1.28		2
			R.TFQGAINK.T	933.528	1.37		2
			R.TGSGFGIR.L	821.44	1.29		2
			K.ADM(15.995)NDPLQIGASIPGK.V	363.146	0		2
			K.CEENGITFIGPSSK.V	1593.77	0		2
			K.DLQEVVLK.G	998.601	0		2
			K.DLQEVVLKGEEAITVR.P	1855.05	0		2
			K.DLQEVVLKGEEAITVR.P	1855.05	0		3
			K.DLQEVVLKGEEAITVRPGSLLPAEDFDEIAK.Y	3466.87	0		4
			K.EDKYGLFR.T	1082.58	0		2
			K.FIDENPDLFEITESK.D	1852.92	0		3
			K.GEEAITVRPGSLLPAEDFDEIAK.Y	2513.31	0		2
			K.GM(15.995)IGQPEGGIPK.D	234.104	0		2
			K.GMIGQPEGGIPK.D	1238.67	0		3
			K.GPIDAYLDM(15.995)DGIIDLAK.R	1021.48	0		2
			K.GPIDAYLDMDGIIDLAK.R	1875.97	0		3
			K.HIEVQILGDNYGNIVHLYER.D	2410.25	0		4
			K.HLQHYNDISK.L	1309.68	0		2
			K.HLQHYNDISK.L	1309.68	0		3
			K.IIEYAPAFSLDDKVR.K	1792.98	0		3
			K.INNVEKADM(15.995)NDPLQIGASIPGK.V	1088.55	0		3
			K.INNVEKADMNDPLQIGASIPGK.V	2408.28	0		2
			K.IVEATM(15.995)CYTGDILDK.T	690.362	0		2
			K.IVEATM(15.995)CYTGDILDK.T	690.362	0		3
			K.IVEATM(15.995)CYTGDILDKTK.T	690.362	0		3
			K.IVEATMCYTGDILDK.T	1783.87	0		3
			K.IVEATMCYTGDILDKTK.T	2042.05	0		2
			K.KVDAIHPGYGFLAENAEFAR.K	2261.17	0		2
			K.LDKDNIIEEGK.N	1356.75	0		2
			K.LDKDNIIEEGK.N	1356.75	0		3
			K.LESDVFFYGLNK.N	1486.77	0		3
			K.LREEIPSIMFQMLLR.A	1904.05	0		3
			K.M(15.995)AQELESLGADIIAIK.D	177.082	0		2
			K.M(15.995)AQELESLGADIIAIK.D	177.082	0		3
			K.NKLDKDNIIEEGK.N	1626.92	0		2
			K.NKLDKDNIIEEGK.N	1626.92	0		3
			K.NKLDKDNIIEEGK.N	1626.92	0		4
			K.NLSFPDSVVDYCK.G	1598.77	0		3
			K.NTERDTGIDLFGYDELGK.Y	2099.03	0		2
			K.NTERDTGIDLFGYDELGK.Y	2099.03	0		3
			K.NYPDNVIEEFTK.E	1523.75	0		3
			K.TNVGFLVNVLNNPIFSNGK.C	2103.16	0		2
			K.TNVGFLVNVLNNPIFSNGK.C	2103.16	0		3
			K.VDAIHPGYGFLAENAEFAR.K	2105.04	0		3
			K.VKEDDM(15.995)VEDK.Q	791.374	0		2
			K.VKEDDMVEDKQLLMIMK.-	2177.16	0		3
			K.VKEDDMVEDKQLLMIMK.-	2177.16	0		4
			K.VVGDLAIFM(15.995)TK.N	991.541	0		2
			K.YLNEKYDINANIR.N	1680.88	0		3
			R.ACSELGIK.S	932.5	0		2
			R.DTGIDLFGYDELGKYYK.D	2081.04	0		3
			R.EEDLELEYETACSESR.K	1986.84	0		2
			R.EVEIKDKNFSGK.I	1504.85	0		2
			R.IFDSLNWVENMKPSINTALETGK.I	2691.4	0		3
			R.IVHREEDLELEYETACSESR.K	2493.15	0		4
			R.KAFGEDIIFIEK.Y	1492.85	0		2
			R.KAFGEDIIFIEK.Y	1492.85	0		3
			R.LDGGNGFTGANISPHYDSLLVK.T	2331.19	0		2
			R.LDGGNGFTGANISPHYDSLLVK.T	2331.19	0		4
			R.LVEIGEVKENGFR.T	1544.86	0		2
			R.LVEIGEVKENGFR.T	1544.86	0		3
			R.STEEAKEVANK.I	1288.69	0		2
			R.TIGFELNGMVR.E	1263.66	0		2
			R.TKADESYLIGEGK.G	1493.8	0		3
WP_003429730.1	50S ribosomal protein L20	50S			1.2	13.29	23
			K.LYRPANTFVMK.A	1394.77	1.2		3
			K.MLSEMAIQDPEGFAK.L	1721.84	20		2
			K.M(15.995)LSEMAIQDPEGFAK.L	177.082	0		2
			K.MLSEM(15.995)AIQDPEGFAK.L	637.282	0		2
			R.KM(15.995)LSEMAIQDPEGFAK.L	333.209	0		3
			R.KMLSEMAIQDPEGFAK.L	1878.97	0		3
WP_009903275.1	aminopeptidase P family protein	aminopeptidase			1.28	13.24	23
			K.ATVSGELTEK.Q	1089.59	1.28		2
			R.MCKDEEEKELMR.I	1680.79	20		3
			R.EIFEIVLEANKR.A	1515.87	0		3
WP_003429729.1	50S ribosomal protein L35	50S			1.53	0	3
			K.STLVSDGDAKR.I	1203.65	1.53		3
			K.STLVSDGDAKR.I	1203.65	0		2
			R.KSTLVSDGDAKR.I	1359.77	0		3
WP_003421160.1	50S ribosomal protein L16	50S			1.7	0	3
			R.VMFELAGVSEDKAR.E	1606.84	1.7		3
			R.VM(15.995)FELAGVSEDK.A	276.151	0		2
			R.VMFELAGVSEDK.A	1379.7	0		2
			R.VMFELAGVSEDKAR.E	1606.84	0		2
WP_003421156.1	30S ribosomal protein S17	30S			1.91	0	2
			R.LVEVVEK.V	870.543	1.91		2
			K.TIVVAVEEFVR.H	1288.74	0		2
WP_003421117.1	50S ribosomal protein L17	50S			1.92	0	2
			R.KGDAAEMAFIELV.-	1448.76	1.92		2
			R.NLVTCLLR.S	1015.58	0		2
WP_003421163.1	30S ribosomal protein S3	30S			2.24	0.51	2
			K.VWICNGEVLPTR.D	1470.77	1.5		2
			R.ADIDYGFAEADTTYGK.I	1791.82	2.24		2
			R.TEGYSEGNVPLQTLR.A	1690.85	2.48		2
			K.KTIIVNIVEVR.S	1338.86	0		3
			K.NAQLVAENIALAIER.R	1651.93	0		2
			K.TIIVNIVEVR.S	1182.73	0		2
			R.AGAGIEALKAELEK.M	1482.87	0		3
WP_003420527.1	30S ribosomal protein S18	30S			2.35	0	2
			R.NIALLPYTLD.-	1159.65	2.35		2
WP_003421158.1	MULTISPECIES: 50S ribosomal protein L29	MULTISPECIES:			4.34	0	2
			R.FQLATGQLENTAR.I	1475.77	4.34		2
			R.DLTSEELMNK.L	1234.61	0		2
WP_003416451.1	RidA family protein	RidA			4.43	0	2
			K.AILAESGADFSNVVK.T	1575.85	4.43		2
WP_003421187.1	50S ribosomal protein L10	50S			5.12	0	2
			K.IVEMANIPSR.E	1156.63	5.12		2
			K.APVSNFAYLIDAIAK.K	1647.92	0		2
			K.GLTVEEVTELRK.Q	1428.82	0		3
			K.MGIVEGAFYDESK.I	1500.72	0		2
WP_009902000.1	threonine--tRNA ligase	threonine--tRNA			5.27	0	2
			K.GVANLIDGIYK.T	1217.7	5.27		2
			K.DGSIKEFENAISVMDVAK.S	2037.05	0		3
WP_003421962.1	type I glyceraldehyde-3-phosphate dehydrogenase	type			5.68	7.29	234
			K.AIGLVIPSLK.G	1065.72	5.66		2
			K.DKAEAHIQAGAK.K	1321.74	4.97		3
			K.GLMTTIHAYTNDQNTLDGPHPK.G	2480.22	20		4
			K.VVISAPATGDLK.T	1225.73	5.7		2
			K.GLMTTIHAYTNDQNTLDGPHPK.G	2480.22	0		3
			K.KVVISAPATGDLK.T	1381.85	0		2
			K.NVTVEEINAAMK.E	1373.72	0		2
			K.VVSWYDNEMSYTSQLIR.T	2119.01	0		2
			R.AAAGNIVPNTTGAAK.A	1410.78	0		2
			R.TLGYFAQLAK.-	1166.67	0		2
			R.VPVVTGSITELVCTLGK.N	1829.04	0		3
WP_009897960.1	S-layer protein SlpA	S-layer			6.1	5.07	234
			K.AFVVGGTGLADAMSIAPVASQLR.N	2259.21	5.92		2
			K.AFVVGGTGLADAMSIAPVASQLR.N	2259.21	5.32		3
			K.AGETTYSTGLTFEDGSTEK.I	2049.95	6.66		2
			K.AGETTYSTGLTFEDGSTEK.I	2049.95	5.43		3
			K.ASIADENSPVK.L	1185.62	6.1		2
			K.DGSTKEDQLVDALAAAPVAANFGVTLNSDGKPVDKDGK.V	3955.07	20		4
			K.DLTGASADAIIAGTSSADGVVTNTGAASGSTETNSAGTK.L	3582.72	20		3
			K.DYVDDLR.T	922.44	5.64		2
			K.ESSYYQDNLNNDKK.V	1800.85	4.47		2
			K.ESSYYQDNLNNDKK.V	1800.85	5.14		3
			K.EVENELKDMGLK.V	1487.79	7.24		3
			K.GIATSVINK.L	957.586	7.23		2
			K.GILDGSITEIK.V	1200.7	6.88		2
			K.IADEVGLDNDK.A	1243.63	3.97		2
			K.KAPLLLTSK.D	1053.72	6.1		2
			K.LGDSDIIDITK.A	1244.69	5.37		2
			K.LLFTQVDNK.L	1132.65	5.16		2
			K.LVSPAPIVLATDSLSSDQSVSISK.V	2470.36	2.77		3
			K.MDLADGDATPIVVVDGK.A	1770.91	7.08		2
			K.TDLNTLYK.V	1022.56	6.68		2
			K.TPSASVQPVITK.L	1282.75	7.2		2
			K.VETGDQGYTVVQSK.Y	1565.79	20		2
			K.VFFEGTLASTIK.V	1367.77	6.67		2
			K.VGSELNAADASK.L	1216.63	6.29		2
			K.VLNGDEADTNGLIEEVSGK.Y	2016.01	2.87		2
			K.VVNFFVAK.D	978.59	5.85		2
			K.YQVVLYPEGK.R	1250.69	4.55		2
			K.YYNSDDENAIFR.D	1533.67	3.35		2
			R.IETAIALSQK.Y	1128.68	3.88		2
			R.IINAKEETIDIDASSSK.T	1918.03	20		2
			R.IINAKEETIDIDASSSK.T	1918.03	6.55		3
			K.AFVVGGTGLADAM(15.995)SIAPVASQLR.N	1235.62	0		2
			K.DLKDYVDDLR.T	1306.68	0		2
			K.DLTGASADAIIAGTSSADGVVTNTGAASGSTETNSAGTK.L	3582.72	0		4
			K.DVENAIDDATGK.S	1302.63	0		2
			K.ESSYYQDNLNNDK.K	1644.73	0		2
			K.EVENELKDMGLK.V	1487.79	0		2
			K.IADEVGLDNDKAFVVGGTGLADAMSIAPVASQLR.N	3457.8	0		3
			K.IADEVGLDNDKAFVVGGTGLADAMSIAPVASQLR.N	3457.8	0		4
			K.LAMSAIFDTAYTDSSETAVK.I	2177.06	0		2
			K.LAMSAIFDTAYTDSSETAVK.I	2177.06	0		3
			K.LDNLGDGDYVDFLITSPGQGDK.I	2395.16	0		2
			K.LLFTQVDNKLDNLGDGDYVDFLITSPGQGDK.I	3482.77	0		3
			K.LTVVPGSK.A	855.543	0		2
			K.LVSPAPIVLATDSLSSDQSVSISK.V	2470.36	0		2
			K.MDLADGDATPIVVVDGK.A	1770.91	0		3
			K.TINDDVKDFLDDSQVDIIGGENSVSK.D	2907.44	0		3
			K.VLDKDNGENLVQVGK.G	1710.95	0		3
			K.VYLAGGVNSISK.E	1262.72	0		2
			R.DSVDNVVLVGGNAIVDGLVASPLASEK.K	2694.45	0		3
			R.TYNNGYSNAIEVAGEDR.I	1899.86	0		2
WP_003438096.1	acetate kinase	acetate			6.15	0	2
			R.GKETVISTADSK.V	1318.73	6.15		2
			R.YGFHGTSHNYVSQR.A	1679.78	0		3
WP_003421107.1	50S ribosomal protein L13	50S			6.4	0	3
			K.SYIAKPADVQR.K	1302.73	6.4		3
			R.VFAGAEHTHAAQNPEVLNFK.-	2236.15	0		3
			R.VFAGAEHTHAAQNPEVLNFK.-	2236.15	0		4
WP_003427762.1	acyl-CoA dehydrogenase family protein	acyl-CoA			6.43	6.07	23
			K.ALQLHGGYGFIK.D	1358.77	20		3
			K.FQNTQFTIADMETK.V	1728.84	5.03		2
			K.IAMGTLEVGR.I	1073.59	7.12		2
			K.MVISSNVLK.-	1045.62	6.43		2
			K.YYASEIANEVAYK.A	1575.78	6.39		2
			R.GLVYDAAQKR.D	1175.67	7.07		2
			R.GTETSDLIFENVK.V	1507.78	5.97		2
			R.IVSIYEGTSEVQK.M	1507.81	20		3
			R.VAQESAMAK.Y	989.522	6.15		2
			K.ALQLHGGYGFIK.D	1358.77	0		2
			K.ALQLHGGYGFIKDYEIER.M	2165.14	0		4
			K.ELDTLPAEMDK.T	1316.65	0		2
			K.ELDTLPAEMDKTGVMPK.E	1959.01	0		2
			K.FISSNIPEEYGGGGAGYVSYAIVMEEIAR.R	3107.5	0		3
			R.GLVYDAAQK.R	1019.57	0		2
			R.IVSIYEGTSEVQK.M	1507.81	0		2
			R.VQFGKPIAK.F	1070.69	0		2
WP_009887863.1	elongation factor Tu	elongation			6.6	6.54	234
			K.LLDQAQAGDNIGALLR.G	1694.93	6.39		2
			R.DLLTEYDFPGDDTPIVR.G	1993.97	5.93		2
			R.GITISTAHVEYETPNR.H	1814.92	7.88		2
			R.GITISTAHVEYETPNR.H	1814.92	6.6		3
			R.KVVVTGVEMFR.K	1319.76	20		2
			R.TKPHVNIGTIGHVDHGK.T	1894.06	6.47		4
			R.YQLGEAVDFANIDKAPEER.E	2221.11	20		3
			K.FTAEVYVLK.K	1124.65	0		2
			K.LLDQAQAGDNIGALLR.G	1694.93	0		3
			K.NM(15.995)ITGAAQMDGAILVCSATDGPM(15.995)PQTR.E	291.125	0		3
			K.TTLTAAITK.T	974.601	0		2
			K.VQDEVELVGLTEAPR.K	1681.89	0		2
			R.DLLTEYDFPGDDTPIVR.G	1993.97	0		3
			R.DTDKPFLMPVEDVFSITGR.G	2223.13	0		3
			R.GSALMALEDPK.S	1186.63	0		2
			R.GSALMALEDPKSEWGDK.I	1917.96	0		3
			R.HYAHVDCPGHADYVK.N	1824.84	0		3
			R.HYAHVDCPGHADYVK.N	1824.84	0		4
			R.QVGVPYIVVFLNK.C	1530.92	0		2
			R.QVGVPYIVVFLNK.C	1530.92	0		3
			R.YQLGEAVDFANIDKAPEER.E	2221.11	0		2
WP_003427760.1	electron transfer flavoprotein subunit beta/FixA family pro	electron			7.23	6.55	2
			K.LDIPQVTYVQDFK.I	1620.88	20		2
			K.QVPDTNEVR.I	1084.55	6.8		2
			K.VGDYDIIFAGR.Q	1252.65	5.67		2
			K.VSTPVLLTAVK.E	1182.76	4.67		2
			R.DGVPSILNPDDANALEEALK.I	2137.1	7.66		2
			R.ECLAMGADDAILLSDR.A	1776.84	20		2
			R.INKETGTLIR.D	1199.72	8.08		2
			R.QLEDGYELIK.V	1262.68	4.09		2
			K.LDIPQVTYVQDFK.I	1620.88	0		3
			K.VWTIDDLDVNKEEVGLK.A	2057.11	0		3
			R.AFGGADTWATSNTIAAGISK.V	1995.01	0		2
			R.AFGGADTWATSNTIAAGISK.V	1995.01	0		3
			R.DGVPSILNPDDANALEEALK.I	2137.1	0		3
			R.ECLAMGADDAILLSDR.A	1776.84	0		3
			R.QAIDGDTAQVGPQIAEK.L	1795.93	0		2
			R.QAIDGDTAQVGPQIAEK.L	1795.93	0		3
WP_003423106.1	IMP dehydrogenase	IMP			7.34	0	2
			R.GQATSIIEVAQAR.D	1370.75	7.34		2
			K.DNVTLSLSK.V	1031.59	0		2
			K.LSFEEGVDSYVPYAGSLK.D	2017.01	0		2
			K.VGIGGGSICITR.E	1216.66	0		2
			K.VSEFMTPMSSIVYANK.D	1859.92	0		2
			R.EGFLYLAEAGADFVK.V	1684.87	0		2
WP_009901809.1	(R)-2-hydroxyisocaproyl-CoA dehydratase subunit HadB	(R)-2-hydroxyisocaproyl-CoA			7.64	6.48	23
			K.KGSLELCEIAESK.G	1546.83	6.1		3
			R.AFTNAQFETR.I	1211.59	7.61		2
			R.IQGLVEVMEER.K	1329.7	20		2
			R.RAAEETGLPYAGFDGDQADPR.A	2264.05	7.67		3
			K.LLIEELEDNMK.T	1401.74	0		2
			K.LMSLIQYEMQR.R	1438.73	0		2
			K.LMSLIQYEMQR.R	1438.73	0		3
			K.YRVDSLVEGK.C	1220.68	0		3
			R.AAEETGLPYAGFDGDQADPR.A	2107.95	0		2
			R.VVINDLLAEQYANAFK.A	1864.02	0		3
WP_003427766.1	isocaprenoyl-CoA:2-hydroxyisocaproate CoA-transferase HadA	isocaprenoyl-CoA:2-hydroxyisocaproate			7.71	6.21	23
			K.DKYPGLIFSQILGYGEK.G	2012.11	20		3
			K.IEPIEGDGIR.V	1125.6	7.24		2
			K.IVGEAMLEK.T	1044.59	7.68		2
			K.LLSEADIFVTNVR.V	1503.83	7.71		2
			K.MGIAYDQIK.D	1093.58	7.83		2
			K.SKEGVEILHK.L	1222.73	5.65		3
			K.VGQHTVEVLK.S	1164.69	4.54		2
			K.VVELSSFIAAPCCAK.M	1706.87	20		2
			K.VVELSSFIAAPCCAK.M	1706.87	20		3
			R.ENPNSPLMTTYK.C	1449.72	8.84		2
			R.GGVSQSVMEK.G	1076.55	6.08		2
			K.DKPGFDYTAYFAR.G	1605.78	0		2
			K.DKPGFDYTAYFAR.G	1605.78	0		3
			K.GTSPANTAAGFGDHYAGLALAAGSLAALHK.K	2866.48	0		4
			K.LLSEADIFVTNVR.V	1503.83	0		3
			K.MLGDWGAEVIK.I	1273.67	0		2
			K.SKEGVEILHK.L	1222.73	0		2
			K.SPASDDENPMFELENGNK.K	2049.9	0		2
			K.SPASDDENPMFELENGNKK.G	2206.03	0		3
			K.TLDEWSALLEEADLPFEK.I	2162.09	0		2
			K.TLDEWSALLEEADLPFEK.I	2162.09	0		3
			K.TYDSGNTGVLVNTPVMFR.N	1998.99	0		2
			R.WIQLALIQYNK.W	1444.84	0		2
WP_003417347.1	electron transfer flavoprotein subunit alpha/FixB family pr	electron			7.88	5.44	234
			K.ELITFGADK.V	1048.58	0.65		2
			K.IAPVVIELLGEGR.K	1392.83	8.86		2
			K.LADKLGGVVGSSR.A	1313.77	20		3
			K.LDSVDDLLEAIKA.-	1456.8	8.39		2
			K.LGGVVGSSR.A	858.492	7.39		2
			R.TGEVIALDYK.I	1163.64	8.36		2
			R.VGTGLTADCTK.L	1177.6	5.71		2
			R.VGTGLTADCTKLEIDPEDKK.I	2302.22	6.33		4
			-.MNDIKDLSSYK.N	1396.73	0		3
			K.EVDAELCAILLGK.D	1485.81	0		2
			K.LDSVDDLLEAIK.A	1385.77	0		2
			K.NVWIFAEQR.E	1189.62	0		2
			K.VYVADDALLEK.Y	1290.71	0		2
			R.TTVLETVK.T	945.575	0		2
			R.VGTGLTADCTKLEIDPEDKK.I	2302.22	0		3
WP_003417352.1	class II fructose-1,6-bisphosphate aldolase	class			8.05	2.26	23
			K.YAGPHTLVEMVK.A	1399.75	9.65		3
			R.DAIQAVVESK.I	1114.62	6.45		2
			K.AYEGGFAIGAFNISDLEQLQGVLK.A	2596.36	0		3
			K.IDDVLGSANSIN.-	1244.62	0		2
			K.LRFDILEEIQSK.L	1545.88	0		3
			K.YAGPHTLVEMVK.A	1399.75	0		2
			K.YTQPAEAVEFVER.T	1565.77	0		2
			R.KFLAENPK.E	1029.62	0		2
			R.TGVDSLAIAIGTSHGAFK.F	1799.98	0		3
WP_003436178.1	elongation factor G	elongation			9.93	7.54	23
			K.GGVEPQSENVWR.Q	1384.67	9.93		2
			K.GILADGEEAER.H	1186.58	20		2
			K.IMTDPFVGK.L	1062.58	20		2
			K.YLEGEELTIDELK.V	1606.83	7.3		2
			R.ATYTMIFDHYEQVPASVAK.K	2227.11	20		3
			R.VAPQEPGEGYK.F	1229.63	6.84		2
			R.VYSGTLESGSYVLNATK.N	1844.96	2.15		2
			K.EDSFIGIIDLLK.M	1417.81	0		2
			K.IGETHEGASQMDWMEQEK.E	2161.95	0		3
			K.IGETHEGASQMDWMEQEKER.G	2447.09	0		4
			K.TVGGSVPK.E	799.48	0		2
			K.VEVVTPEDYMGDVMGDLNSR.R	2254.03	0		2
			K.VYAGDIAAAVGLK.D	1302.75	0		2
			R.ATYTMIFDHYEQVPASVAK.K	2227.11	0		2
			R.ETITQPVDVEYK.Y	1476.77	0		2
			R.NIGIMAHIDAGK.T	1294.71	0		3
			R.QAETYGVPR.I	1047.53	0		2
			R.VYSGTLESGSYVLNATK.N	1844.96	0		3
WP_009897862.1	pyruvate:ferredoxin (flavodoxin) oxidoreductase	pyruvate:ferredoxin			11.31	5.21	23
			K.AVFTEWLDSR.N	1250.63	10.79		2
			K.FWGLGSDGTVGANK.Q	1463.74	20		2
			K.GDVMPANTVK.G	1086.57	9.01		2
			K.IVNMNYAAVDAGINALVK.V	1932.06	20		2
			K.LAEIIPEEDAVK.Y	1381.77	11.8		2
			K.LGQEIGLGNR.I	1083.6	20		2
			K.QSYVYQYDLLK.G	1474.77	20		2
			K.TVFDNLVSEQPK.N	1431.76	10.82		2
			K.VAGELLPGVFHVSAR.A	1578.89	20		3
			K.VVTQLYGDR.M	1077.58	10.75		2
			K.YAQAYFDYDSK.K	1425.65	9.94		2
			K.YYQNIVGIVEK.Y	1380.77	10.37		2
			R.ALASQALSIFGDHQDVMAAR.Q	2129.08	20		3
			R.ATYLIDEADYIACHK.Q	1838.9	20		3
			R.DNALSPNHPVAR.G	1317.68	20		2
			R.DNALSPNHPVAR.G	1317.68	8		3
			R.GTAQNPDIYFQTR.E	1537.75	9.16		2
			R.TKEPGSTGEPLYLDVR.D	1816.96	8.8		3
			K.ENAPMIIGGR.Y	1084.57	0		2
			K.FYTVNAVK.L	996.564	0		2
			K.HFLDAMPSTVER.I	1429.7	0		2
			K.HFLDAMPSTVER.I	1429.7	0		3
			K.IVDAMTELVSM(15.995)DICEDAK.A	1235.61	0		2
			K.IVDAMTELVSM(15.995)DICEDAK.A	1235.61	0		3
			K.IVDAMTELVSMDICEDAK.A	2095.99	0		2
			K.IVDAMTELVSMDICEDAK.A	2095.99	0		3
			K.IVNM(15.995)NYAAVDAGINALVK.V	503.278	0		3
			K.IVNMNYAAVDAGINALVK.V	1932.06	0		3
			K.KSGGITMSHLR.F	1241.69	0		3
			K.NGFTVGIVDDVTNTSLTPSEPIK.I	2460.28	0		2
			K.NGFTVGIVDDVTNTSLTPSEPIK.I	2460.28	0		3
			K.NPFTLDSKEPTASFK.D	1764.93	0		3
			K.QFPEEADGLFAK.A	1406.71	0		2
			K.VEVPASWENAVDADKGEVKEPEFIK.N	2898.51	0		4
			K.VVELLEKPACDCTDEK.A	1989.98	0		3
			K.YAQAYFDYDSKK.S	1581.77	0		3
			R.ALASQALSIFGDHQDVM(15.995)AAR.Q	1829.9	0		3
			R.ATYLIDEADYIACHK.Q	1838.9	0		2
			R.GTAQNPDIYFQTR.E	1537.75	0		3
			R.INMIMQSAFFK.L	1384.72	0		2
			R.MQLSPLDCTGCGNCADICPAK.E	2424.04	0		2
			R.MQLSPLDCTGCGNCADICPAK.E	2424.04	0		3
			R.QTGCVLLASGSVQEVADIAPVAHLAAIEGR.L	3060.61	0		3
			R.TKEPGSTGEPLYLDVR.D	1816.96	0		2
			R.TVANEAQAVACGYWHLYR.F	2137.02	0		3
WP_003424537.1	30S ribosomal protein S2	30S			13.01	8.19	23
			K.DMPELPGAMFVVDPR.K	1700.83	20		2
			K.QAQDAIKDEAER.C	1428.72	5.63		3
			R.ELEKMEEEGVFNVLPK.K	1975.04	20		3
			R.KENIAIQEAHR.L	1363.76	6.02		3
			K.EVAETGKPILFVGTK.K	1671.98	0		2
			K.KQAQDAIKDEAER.C	1584.85	0		2
			K.LITGAMATAVIEGR.Q	1429.8	0		2
			R.CGMYFVNER.W	1202.52	0		2
			R.NGIYIIDLQK.T	1231.72	0		2
			R.QGAEEEVAEDQE.-	1360.56	0		2
			R.WLGGMLTNHK.T	1211.65	0		3
WP_003421148.1	30S ribosomal protein S8	30S			13.08	9.79	23
			R.ILLEEGFIR.G	1116.65	6.16		2
			R.VYAANHEIPK.V	1196.66	20		3
			K.HETVDVPASNMK.K	1382.69	0		3
			K.VLNGLGISVISTSK.G	1442.87	0		2
WP_003420866.1	NAD-specific glutamate dehydrogenase	NAD-specific			13.12	8.1	23
			K.EHGNLLNFPGAK.R	1351.72	20		3
			R.GYIDGIYK.L	983.533	6.24		2
			R.TAATGFGVAVTAR.E	1248.68	5.7		2
			R.VIEVSIPVK.M	1038.67	20		2
			K.DVNVFEMAQSQVK.N	1549.78	0		3
			K.GGIIVDPSTLSQGELER.L	1797.95	0		2
			K.IAVQGIGNVGSYTVLNCEK.L	2078.09	0		2
			K.LVCEAANGPTTPEADEVFAER.G	2304.08	0		2
WP_003434148.1	triose-phosphate isomerase	triose-phosphate			13.98	8.51	2
			K.GAFTGEVSPLMLK.E	1404.77	20		2
			K.VVVAYEPIWAIGTGK.T	1657.94	7.96		2
			K.ALENVLKDDLAK.V	1411.83	0		3
			K.GLYGELANEVR.I	1247.65	0		2
			K.TATAEDANDVISYIR.E	1665.82	0		2
WP_003438030.1	nitroreductase family protein	nitroreductase			14.32	8.03	23
			K.LVPEIDVDVR.I	1181.67	8.64		2
			R.KDGHTNLYEEK.I	1416.72	20		3
			K.SDMQVVTDK.G	1077.54	0		2
			R.ALLDAFHYAR.L	1203.64	0		2
			R.ALLDAFHYAR.L	1203.64	0		3
			R.SEVFNNLDK.V	1120.58	0		2
WP_009888223.1	2-hydroxyisocaproyl-CoA dehydratase activator HadI	2-hydroxyisocaproyl-CoA			15.03	7.04	3
			K.IEDIVAGIHTSVAK.R	1507.86	10.05		3
			K.QISELSCHAR.G	1227.6	20		3
			K.IEDIVAGIHTSVAK.R	1507.86	0		2
			R.GVNFIIPETR.T	1172.66	0		2
			R.TIIDIGGQDAK.V	1185.66	0		2
WP_003419930.1	NADH peroxidase	NADH			15.53	5.32	23
			K.AFLGLLNR.Y	930.565	20		2
			K.VGADKFEEMK.G	1236.64	20		2
			K.VGADKFEEMKGEK.N	1578.83	20		2
			R.IALEEAEHAAK.F	1236.67	10.36		3
			R.IGVAQGVDEEIIEGLR.A	1724.93	9.57		2
			R.IGVAQGVDEEIIEGLR.A	1724.93	20		3
			R.VRVDAEYGATDGK.L	1435.73	11.06		2
			R.VRVDAEYGATDGK.L	1435.73	9.41		3
			K.AKELGLDAIHDTVHEMCKDEAR.H	2622.3	0		5
			K.ELGLDAIHDTVHEMCK.D	1923.93	0		4
			K.ELGLDAIHDTVHEMCKDEAR.H	2395.13	0		3
			K.ELGLDAIHDTVHEMCKDEAR.H	2395.13	0		4
			K.ELGLDAIHDTVHEMCKDEAR.H	2395.13	0		5
			K.FAELLGEVVVADTK.E	1545.87	0		3
			K.FAELLGEVVVADTKENLR.V	2059.14	0		3
			R.EGYPEVGEAYKR.I	1452.72	0		3
			R.IALEEAEHAAK.F	1236.67	0		2
			R.QADREGYPEVGEAYKR.I	1923.95	0		3
			R.QADREGYPEVGEAYKR.I	1923.95	0		4
			R.VDAEYGATDGK.L	1180.56	0		2
WP_003416023.1	phosphate propanoyltransferase	phosphate			20	0	2
			K.LVGPAGEVEMK.E	1184.65	20		2
			-.MKLPIALSNK.H	1197.75	0		3
			R.ALVFENVLVR.A	1186.71	0		2
WP_003416871.1	glycine/sarcosine/betaine reductase component B subunit	glycine/sarcosine/betaine			20	0	23
			K.TVIVTDEYAGR.D	1250.65	20		2
			R.ADAVVTGGNANQVVVLPK.L	1807.02	20		2
			R.ADAVVTGGNANQVVVLPK.L	1807.02	20		3
			R.DGGSQSLADADVR.A	1317.62	0		2
WP_003417090.1	trigger factor	trigger			20	7.03	23
			K.AEGIEATEEEFKAELEK.M	2007.01	20		3
			K.SSLVLEAITK.A	1115.68	20		2
			K.VENTVSDENVDAK.L	1474.72	7.82		2
			K.AEGIEATEEEFKAELEK.M	2007.01	0		2
			K.TIDLLVDNATIA.-	1285.71	0		2
WP_003418513.1	rubrerythrin family protein	rubrerythrin			20	6.59	24
			K.EAREEGFDK.I	1135.55	20		2
			K.EGYNQIAAIFEETANNEKEHAK.L	2590.27	20		4
			K.IAYLFEAVGK.I	1165.67	20		2
			K.LLENLNEGK.I	1084.61	3.87		2
			K.NLMAGFAGESEAR.N	1379.65	20		2
			R.KEGYNQIAAIFEETANNEKEHAK.L	2746.4	20		4
			K.NLM(15.995)AGFAGESEAR.N	404.209	0		2
WP_003418888.1	acyl-CoA dehydrogenase	acyl-CoA			20	0	2
			K.FQNTQFQLADMEVK.V	1753.87	20		2
			K.AVQLHGGYGYTR.D	1348.69	0		3
			K.DLGKPYGVEAAMAK.L	1532.83	0		2
			K.DLGKPYGVEAAMAK.L	1532.83	0		3
			K.EYGGEGGDTVGYIMAVEELSR.V	2260.04	0		2
			K.GTPGFSFGVK.E	1051.57	0		2
			K.LFAAETAMEVTTK.A	1466.77	0		2
WP_003419082.1	50S ribosomal protein L21	50S			20	0	2
			K.LGSPVVEGASVQAK.V	1396.79	20		2
			K.VSEGDVLFVEK.L	1276.69	20		2
WP_003420374.1	thioredoxin	thioredoxin			20	0	23
			K.DGKPVETLIGFMPK.N	1614.91	20		2
			K.DGKPVETLIGFMPK.N	1614.91	20		3
WP_003421125.1	30S ribosomal protein S13	30S			20	0	23
			K.AEINPDTR.I	942.477	20		2
			R.IKDLSEDQVNELR.K	1613.86	20		3
			R.AEIGLTYIYGIGK.A	1452.82	0		2
			R.KVIDDDFLVEGDLRR.E	1846	0		3
WP_003421173.1	50S ribosomal protein L3	50S			20	0	23
			K.VTVQNLEVVK.V	1183.72	20		2
			R.VDSVEGYTVGQEIK.A	1578.81	20		3
			K.GVVIPVTAVEAGPMVVTQIK.T	2064.21	0		3
			K.KVGMTQIFTDK.G	1350.76	0		3
			K.VGMTQIFTDK.G	1194.63	0		2
			R.VDSVEGYTVGQEIK.A	1578.81	0		2
WP_003421180.1	30S ribosomal protein S7	30S			20	7	23
			K.EIMDAANNTGASVK.K	1475.73	20		2
			K.TGEEALEVFNK.A	1291.67	20		2
			R.EVLPDPMYGSK.V	1290.65	20		2
			R.VGGANYQVPIEVRPER.R	1810.97	6.01		3
WP_003421367.1	F0F1 ATP synthase subunit alpha	F0F1			20	0	2
			R.SVYEPLQTGIK.S	1289.72	20		2
			R.EAYPGDVFYLHSR.L	1580.76	0		3
			R.ELAAFSQFGSDLDEDTK.K	1928.91	0		2
WP_003422090.1	proline racemase	proline			20	0	2
			K.GEIVEETK.V	959.518	20		2
			K.NVVIFGQGQVDR.S	1358.73	20		2
			R.SIQAIDSHTAGEATR.I	1583.79	0		2
WP_003422104.1	D-proline reductase (dithiol) proprotein PrdA	D-proline			20	0	23
			K.IVLEENEQSLPMSK.K	1671.88	20		2
			K.IVLEENEQSLPMSK.K	1671.88	20		3
			K.LKETLDALSPMTTDNVEGYK.A	2309.19	20		3
			K.NAIEGVEVK.A	1013.58	20		2
			K.QGIENEILSNNTLAPEDAVR.I	2211.12	20		2
			K.SKQGIENEILSNNTLAPEDAVR.I	2454.28	20		2
			K.SKQGIENEILSNNTLAPEDAVR.I	2454.28	20		3
			K.YMTHMVDNNK.S	1307.6	20		2
			R.GIPVVGVSFSAVQGALVVGNK.Y	2054.2	20		2
			R.GIPVVGVSFSAVQGALVVGNK.Y	2054.2	20		3
			K.AGEAKEEVVEETVEEAAPVSEAAVVPVSTGVAGETVK.I	3752.94	0		3
			K.IVLEENEQSLPM(15.995)SK.K	1428.72	0		2
			K.IVLEENEQSLPM(15.995)SK.K	1428.72	0		3
			K.QGIENEILSNNTLAPEDAVR.I	2211.12	0		3
			R.AMEDEEIDLVGVVFVGSPQVNAEK.F	2631.32	0		3
			R.NAEEICKEANETQELVVDMK.L	2434.18	0		3
WP_003422953.1	serine hydroxymethyltransferase	serine			20	0	3
			K.EALSDEFKEYQVQVAK.N	1968.03	20		3
			K.AIFPGIQGGPLEHIIASK.A	1904.1	0		3
			K.ALAEELIK.R	941.58	0		2
WP_003424083.1	hypothetical protein	hypothetical			20	0	23
			K.ITLPETAIDTLK.S	1369.81	20		2
			K.SILKDNQDKPNNIR.V	1737.97	20		3
			R.VYFAGVGCGGPSFGLALDEK.K	2100.04	0		2
WP_003424535.1	elongation factor Ts	elongation			20	0	3
			K.KALQEAEGNMEK.A	1430.74	20		3
			-.MANITAQMVK.E	1161.62	0		2
			K.ALQEAEGNMEK.A	1274.62	0		2
			K.VLELGKDVAMQVAAMNPK.Y	1998.11	0		3
			K.VVTNGQVAGYIHGGGK.I	1611.87	0		3
			R.EENFAEEVAK.Q	1220.59	0		2
WP_003425341.1	glutamine-hydrolyzing GMP synthase	glutamine-hydrolyzing			20	0	3
			R.EADAVYMDELRK.A	1494.74	20		3
			K.GIIFTGGPNSAYLEDSPTISK.E	2223.15	0		2
			R.AVTSSDGMTSDWYK.M	1602.72	0		2
WP_003425850.1	F0F1 ATP synthase subunit beta	F0F1			20	0	2
			K.VVQIVGAVLDVK.F	1294.82	20		2
			K.IGLFGGAGVGK.T	1030.62	0		2
			K.TALVFGQMNEPPGAR.M	1614.82	0		2
			K.TVLIQELINNIAK.Q	1523.93	0		2
			K.VVDLLAPYLK.G	1185.74	0		2
			R.GMEVVDTGGPISVPVGDETLGR.I	2213.11	0		3
			R.IFNVLGKPVDGKPAPK.S	1792.11	0		4
			R.ILDPSIVGKEHYEVAR.G	1882.04	0		4
			R.QISSLGIYPAVDPLESTSR.I	2061.08	0		2
WP_003427763.1	(R)-2-hydroxyisocaproyl-CoA dehydratase subunit beta	(R)-2-hydroxyisocaproyl-CoA			20	6.47	234
			K.EVVENPNAAVK.K	1224.67	7.26		2
			K.HSNTIKPSIR.S	1207.7	20		2
			K.IHESIEVYNEHR.K	1552.76	20		3
			K.IHESIEVYNEHRK.T	1708.89	20		3
			K.VLLTGILADSKDILDILEDNNISVVADDLAQETR.Q	3739.01	20		4
			R.ELEEICGYEIEEAK.I	1766.83	20		2
			R.GSLIVDEVK.K	1014.6	6.48		2
			R.IQTFAEMMSLA.-	1268.61	7.5		2
			R.KEEHTELVK.D	1195.68	20		3
			K.DIDGVIFCMMK.F	1383.66	0		2
			K.MKEVVENPNAAVK.K	1511.84	0		2
			K.MKEVVENPNAAVK.K	1511.84	0		3
			K.VLLTGILADSK.D	1184.74	0		2
			R.DFVEVAYK.H	1025.54	0		2
WP_003428474.1	FprA family A-type flavoprotein	FprA			20	0	3
			K.ANFKDEFLSNLSEVTDIAK.I	2225.17	20		3
			K.DGEILNIGK.R	1013.58	0		2
			K.IDYVVIHHTEPDHAGSLK.Y	2087.09	0		4
WP_003429271.1	PLP-dependent aminotransferase family protein	PLP-dependent			20	0	23
			K.FIDVPTDSDGMIMEELEK.I	2125	20		2
			K.FIDVPTDSDGMIMEELEK.I	2125	20		3
			K.TNVNKDDILVTSGSQQGLDFAGK.V	2491.3	20		3
			R.FEGETLPSLK.S	1175.64	20		2
			K.FMDMYDLDAHVDK.I	1654.74	0		3
			K.MIYVIPDFQNPTGR.T	1677.85	0		2
			K.MIYVIPDFQNPTGR.T	1677.85	0		3
			K.NVAYVAGGGFFPNGGR.E	1609.8	0		2
			K.QGADLQASTISQMEVSK.F	1847.93	0		2
			R.SAMQYTTTEGYEPLR.E	1773.82	0		2
WP_003429565.1	phosphoglycerate kinase	phosphoglycerate			20	0	24
			K.EVVFAADDNVVGENAK.K	1731.87	20		2
			R.YRKEETKNEENFSK.E	1913.99	20		4
			K.ELASLAEIFVNDAFGTAHR.A	2089.07	0		3
			K.GEAKPELSLAPVAK.R	1492.89	0		3
WP_003430084.1	toxic anion resistance protein	toxic			20	0	2
			R.NAQNVSTQSAQIAR.M	1514.78	20		2
			R.MAGTSSVQIETLEK.M	1548.81	0		2
WP_003430157.1	NAD(P)/FAD-dependent oxidoreductase	NAD(P)/FAD-dependent			20	0	23
			K.APSIDNYLGFYDISGDELKDK.F	2444.22	20		3
			R.GVGYCATCDAPLYR.N	1629.73	20		2
			K.AAGQGQIAALNAVYYLDK.L	1922.03	0		2
WP_003430702.1	transketolase family protein	transketolase			20	0	2
			K.ALEAAEELAK.E	1099.61	20		2
			R.AATPDVNSENYK.F	1363.66	0		2
			R.GIPNMVVLNPADALEAR.Q	1806.97	0		2
WP_003430934.1	molecular chaperone DnaK	molecular			20	0	23
			K.AVKDNQDATAEELKK.A	1770.97	20		3
			K.SYTPQEISAIILQK.L	1645.93	20		3
			R.TTPSVVAFTK.D	1105.64	20		2
			K.AVKDNQDATAEELKK.A	1770.97	0		4
			K.DNQDATAEELKK.A	1444.74	0		3
			K.EKIEAFNQAESTIYQTEK.T	2213.13	0		3
			K.IEAFNQAESTIYQTEK.T	1927.96	0		2
			K.ITITSNTNLSEAEIEQK.I	1947.02	0		2
			K.TALQDAGLSTGDIDDVLLVGGSTR.I	2402.24	0		2
WP_003431407.1	D-2-hydroxyacid dehydrogenase	D-2-hydroxyacid			20	0	2
			R.GGLINTGDLIEALESGK.I	1741.95	20		2
			R.WIAELLGTEVR.S	1313.73	20		2
			K.EADLITLHTPLLEGTK.H	1807.02	0		3
			K.GYDGISIQQTNYIDNPYIYETLK.D	2764.37	0		3
			K.ILVFGAR.D	802.506	0		2
			K.MNPGELTDPEINK.L	1512.75	0		2
			R.AAALDTFETEGLFLNK.K	1795.94	0		2
			R.AAALDTFETEGLFLNK.K	1795.94	0		3
			R.AAALDTFETEGLFLNKK.M	1952.07	0		3
			R.SITVGVIGTGK.I	1086.66	0		2
WP_003432442.1	3-methyl-2-oxobutanoate dehydrogenase subunit VorB	3-methyl-2-oxobutanoate			20	0	2
			R.GGPGLGSIQPSQADYFMSTR.G	2097	20		2
			K.IGGAFVQAESEVSAINMVYGGAGAGAR.V	2610.29	0		3
			K.IIAGELVAGGAR.-	1153.68	0		2
			K.YFFGYPITPQSELPEYLSR.E	2335.16	0		2
WP_003432446.1	glutamine--fructose-6-phosphate transaminase (isomerizing)	glutamine--fructose-6-phosphate			20	4.6	2
			K.GTPVIAIATQEK.L	1282.75	9.72		2
			K.IQEILDNEEYIK.E	1561.82	20		2
			R.EFYDSMISK.M	1174.56	20		2
			R.GAYALGVICK.E	1106.62	20		2
			R.GYDSAGVAVNSSNEK.E	1552.74	20		2
			K.AAEVIVEGLSK.L	1170.69	0		2
			K.TVVSSEHAFYLGR.G	1492.77	0		3
			R.ESDDVFYTWAGPEVAVASTK.A	2228.07	0		2
			R.ILSITNVVGSSIAR.E	1456.86	0		2
WP_003434936.1	SEC-C domain-containing protein	SEC-C			20	0	2
			R.NLSDNHESQEAEVK.F	1654.78	20		2
			R.NLSDNHESQEAEVK.F	1654.78	0		3
WP_003435562.1	serine--tRNA ligase	serine--tRNA			20	0	3
			R.IPNVPHPEVPQGETDEDNVQIR.T	2511.24	20		3
			R.YVEISSCSNFEDFQAR.R	1979.88	0		2
WP_003435635.1	glucose-6-phosphate isomerase	glucose-6-phosphate			20	0	2
			R.QLATEEGYETFVIPDDVGGR.F	2224.07	20		2
			K.AFEGTLLAHTDGK.V	1414.75	0		3
			R.AAIDMVSHSFR.N	1260.63	0		3
WP_003436174.1	DNA-directed RNA polymerase subunit beta	DNA-directed			20	0	23
			R.LSTIHIEEYECEAR.D	1776.84	20		3
			R.SVGELLQNQVR.I	1269.7	20		2
			K.GETELTAEER.L	1161.55	0		2
			K.VLTDEDQEIEVR.E	1472.74	0		2
			R.VTADEIIIKR.E	1212.74	0		3
WP_003436176.1	30S ribosomal protein S12	30S			20	0	3
			R.GTLDTAGVDKR.R	1187.65	20		3
			R.GTLDTAGVDKR.R	1187.65	0		2
WP_003436400.1	FAD-dependent oxidoreductase	FAD-dependent			20	6.43	23
			K.GLEVVVVEAMDSILSK.Q	1743.97	20		2
			K.TVLFETVKDK.H	1262.75	20		3
			R.ANTQMVQDTSVK.I	1376.7	8.87		2
			K.DGSLVGAILINDLSCTVK.L	1931.05	0		3
			K.IDYIVVSHTEPDHAGSVEK.L	2152.09	0		4
			K.IKDLDIDTVCPGHGPVLTENPR.K	2502.3	0		4
			K.TLVTCDSFGSHYSNDK.I	1885.85	0		3
			R.LGVAVDGIEGDGK.A	1284.69	0		2
WP_003439900.1	proline iminopeptidase-family hydrolase	proline			20	0	2
			K.SYILSSTLSSAK.L	1311.73	20		2
			K.ALLDAVNTGDYSSK.E	1508.77	0		2
WP_004454042.1	serine dehydratase subunit alpha family protein	serine			20	0	23
			K.AKELLGEEIVENR.M	1554.86	20		2
			K.ALAISHLVTGYIK.N	1440.87	20		3
			K.DIEFLLDGVK.M	1203.68	20		2
			K.IAEDYMDNTPLSITPADTR.E	2151.02	20		2
			K.MNEEMAEYGLK.Q	1369.63	20		2
			K.ALAISHLVTGYIK.N	1440.87	0		2
			K.DGEVLLDNEPK.V	1283.66	0		2
			K.IAEDYMDNTPLSITPADTR.E	2151.02	0		3
			K.TGIGVGYGIK.K	1019.6	0		2
			R.MLVSPSIYK.N	1092.63	0		2
WP_004454390.1	2-hydroxyacyl-CoA dehydratase	2-hydroxyacyl-CoA			20	0	2
			R.ILITGSPIGGISEK.I	1439.86	20		2
			K.TLEDAGASVVAYELCGAIR.S	2023.01	0		2
WP_004454646.1	aldehyde dehydrogenase family protein	aldehyde			20	0	2
			K.LAVEETGMGVYEDK.V	1595.78	20		2
			K.SFEEGVAIAK.A	1105.6	20		2
			K.VVYYNAEYLAK.L	1387.74	20		2
			K.IGAPENLIQILDQQSR.E	1821.99	0		2
			K.NIEYAGENIEVSR.F	1520.75	0		2
			K.TVEMINEELEK.I	1389.71	0		2
WP_004454939.1	isoleucine--tRNA ligase	isoleucine--tRNA			20	0	3
			K.LNAHETANKLEK.G	1450.81	20		3
			R.FWATELTEDKK.A	1450.77	20		3
			K.VLGEDYEVLEEMK.G	1608.8	0		2
WP_004454985.1	ABC transporter substrate-binding protein	ABC			20	0	2
			K.NYALVAQQELK.K	1331.74	20		2
			K.DAKPSPAILFEDWSK.L	1787.95	0		3
			K.DAPIYTIDYEQNLMAAQK.N	2140.06	0		2
			K.DAPIYTIDYEQNLMAAQK.N	2140.06	0		3
			K.EDSLASNIVYAPLYTYEK.G	2132.08	0		2
			K.GNLVNYLAEK.V	1175.65	0		2
			K.IIPNEASQEAALNNGEISLMK.T	2298.2	0		2
			K.ITLPTASESFLYGISK.I	1782.98	0		2
			K.ITLPTASESFLYGISK.I	1782.98	0		3
			R.LNYIVFNQNISNMANK.E	1939.01	0		2
			R.QALSYALNR.N	1062.58	0		2
WP_009888019.1	anaerobic carbon-monoxide dehydrogenase catalytic subunit	anaerobic			20	0	3
			K.GVAAVVGCSNMTAGGHDVNTVELTK.E	2543.26	20		3
			K.KANAEYIGLDR.S	1304.71	20		3
			K.IKGVAAVVGCSNMTAGGHDVNTVELTK.E	2812.47	0		4
			K.LVGCTCVGQDLQLR.G	1645.83	0		2
			K.NLGLKDVECNA.-	1287.65	0		2
			R.AVASGAACYLHVVENTAK.N	1916.99	0		2
			R.AVASGAACYLHVVENTAK.N	1916.99	0		3
			R.GICGADADTIVAR.N	1345.67	0		2
WP_009888533.1	formate--tetrahydrofolate ligase	formate--tetrahydrofolate			20	0	2
			K.ADLNNENLEALEK.G	1527.78	20		2
			K.LILTTAINPTPAGEGK.T	1650.96	0		2
WP_009888725.1	4Fe-4S dicluster domain-containing protein	4Fe-4S			20	0	23
			-.MFQFETQIHK.L	1363.7	20		3
			R.GFGAAGGLTK.A	933.528	20		2
			K.VVFIGPCTAK.K	1146.65	0		2
WP_009889064.1	alanine--tRNA ligase	alanine--tRNA			20	0	3
			K.GGGRPNMAQAGASDVSK.V	1657.82	20		3
			K.AYPVLVEK.E	973.585	0		2
			K.FEGMDMDTLRETADNLR.D	2041.93	0		2
			R.TGDIENVGITAR.H	1272.67	0		2
WP_009889131.1	peptidylprolyl isomerase	peptidylprolyl			20	0	23
			K.DMGGDLGTFGR.G	1152.52	20		2
			K.HILVDSDEKAK.E	1337.76	20		3
			K.SEEISFEDAALK.H	1393.7	20		2
			R.GQMVPEFEEAVFSMAK.G	1855.89	20		3
			K.SLDPYQAMQFK.T	1382.69	0		2
WP_009889371.1	NADH peroxidase	NADH			20	5.34	23
			K.AFLGLLNR.H	930.565	20		2
			K.GEMVWADEHR.I	1256.56	20		2
			K.VGADKFEEMK.G	1236.64	20		2
			K.VGADKFEEMKGEMVWADEHR.I	2448.16	20		3
			R.IAFEEAEHAAK.F	1270.66	8.78		3
			R.QADREGYPEVAEAYKR.I	1937.97	20		3
			R.VRVDAEYGATDGK.L	1435.73	11.06		2
			R.VRVDAEYGATDGK.L	1435.73	9.41		3
			K.ELGLDAIHDTVHEMCK.D	1923.93	0		4
			K.ELGLDAIHDTVHEMCKDEAR.H	2395.13	0		3
			K.ELGLDAIHDTVHEMCKDEAR.H	2395.13	0		4
			K.ELGLDAIHDTVHEMCKDEAR.H	2395.13	0		5
			K.FAELLGEVVVADTK.E	1545.87	0		3
			K.FAELLGEVVVADTKENLR.V	2059.14	0		3
			R.AKELGLDAIHDTVHEMCKDEAR.H	2622.3	0		5
			R.ANFTGECTEVGMYLAMSR.Q	2064.91	0		2
			R.IAFEEAEHAAK.F	1270.66	0		2
			R.IGVAQGVDAEIIEGLR.A	1666.93	0		2
			R.QADREGYPEVAEAYK.R	1780.86	0		3
			R.QADREGYPEVAEAYKR.I	1937.97	0		4
			R.VDAEYGATDGK.L	1180.56	0		2
WP_009890721.1	threonine ammonia-lyase	threonine			20	0	2
			K.IVGVQTANIPSMK.E	1412.81	20		2
			K.ETGATFLHPFNDK.Y	1531.77	0		3
			K.IASLTDEEKANGVIASSAGNHAQGVALGAK.M	2963.58	0		4
			K.IVSEGAGAVCTAAILSGK.Y	1758.95	0		2
			R.IISENGGNILSANQGK.L	1669.9	0		2
WP_009892576.1	NAD(P)/FAD-dependent oxidoreductase	NAD(P)/FAD-dependent			20	0	2
			K.VVQTEDITVNYDK.L	1578.81	20		2
			K.DIYAAGDVVGK.N	1162.62	0		2
			R.QLDEYTASVYENK.F	1614.78	0		2
WP_009895180.1	proline--tRNA ligase	proline--tRNA			20	0	2
			R.DFEGIVGDFR.N	1181.57	20		2
			K.DAYSFDVDDKGLDK.S	1670.8	0		3
			K.EIPADAEITSHQLMVR.S	1836.94	0		3
			R.EYCLGPTHEEAFTDIIR.Q	2078.98	0		3
WP_009895182.1	proline--tRNA ligase	proline--tRNA			20	5.86	234
			K.DIENNQAMVFR.R	1363.66	3.54		2
			K.GVAVEVDDRDNYTTGWK.F	1980.96	20		2
			K.HREDNTSIVENMDEFRK.A	2176.04	20		4
			K.TDLVDYAPVK.G	1175.64	20		2
			K.TMWCGDAECEAK.I	1512.6	20		2
			R.CLPFEQENLGHK.C	1526.76	8.26		3
			R.EDNTSIVENMDEFRK.A	1881.88	20		3
			R.EGNLANPYHTSWGASTR.L	1888.89	20		2
			R.LIGGLIMTHSDNR.G	1453.77	20		3
			R.TYTIEAMMHDGK.A	1451.68	20		2
			R.VAPIQVVIVPIAAK.K	1472.97	10.71		2
			R.VAPIQVVIVPIAAK.K	1472.97	20		3
			K.ALCEELLAMPVVAGQK.S	1783.96	0		2
			K.ALCEELLAMPVVAGQK.S	1783.96	0		3
			K.ALQSGTSHFLGQHFTK.A	1814.95	0		2
			K.ALQSGTSHFLGQHFTK.A	1814.95	0		3
			K.ALQSGTSHFLGQHFTK.A	1814.95	0		4
			K.DIENNQAM(15.995)VFR.R	961.418	0		2
			K.GFMVVKPYGYALWEK.M	1872.01	0		3
			K.GVAVEVDDRDNYTTGWK.F	1980.96	0		3
			K.KGNVMETVDK.I	1203.65	0		2
			K.KGNVMETVDK.I	1203.65	0		3
			K.MEDDFPQWYTDVITK.T	1943.91	0		2
			K.QFVEEITK.M	1048.58	0		2
			R.EGNLANPYHTSWGASTR.L	1888.89	0		3
			R.ELPYLYNQWCSVVR.W	1854.92	0		2
			R.LIGGLIMTHSDNR.G	1453.77	0		2
WP_009896192.1	cysteine desulfurase NifS	cysteine			20	0	2
			R.AGTENIPAIVGYGK.A	1444.79	20		2
			K.GVGALYIR.K	875.523	0		2
			R.LYMDYSATTPIKK.E	1613.87	0		3
WP_009898069.1	bifunctional acetaldehyde-CoA/alcohol dehydrogenase	bifunctional			20	5.97	234
			K.DMYLNSYYGR.-	1308.58	20		2
			K.ETGMGIAEDK.V	1105.53	8.49		2
			K.EVDLTLATGGPGMVK.S	1542.83	20		2
			K.IAEPIGVIAAVVPTTNPTSTAIFK.A	2466.42	20		2
			K.IAEPIGVIAAVVPTTNPTSTAIFK.A	2466.42	8.96		3
			K.IAEPIGVIAAVVPTTNPTSTAIFK.A	2466.42	20		4
			K.IFATYSQEQVDK.I	1483.76	9.35		2
			K.IFATYSQEQVDK.I	1483.76	20		3
			K.IFLAASLAANK.Q	1173.71	8		2
			K.IMWTLYEHPDVDFQDLAMR.F	2408.14	20		3
			K.IVGQTACTIAK.L	1216.68	8.05		2
			K.LAGFEVPVDTK.V	1230.69	7.72		2
			K.LAPSLTLGCGSWGGNSVSENVGVK.H	2445.24	20		2
			K.LVEDGGFGHTSSLYIDDVNQR.E	2350.13	7.31		3
			K.TAVNSILVSK.T	1086.66	9.04		2
			R.EFNPDVIISIGGGSAMDAGK.I	2034.02	20		2
			R.GAYLLDKDETEK.I	1464.77	20		2
			R.ILINTPSSQGGIGDLYNFK.L	2093.12	20		3
			K.AVTDLLDEM(15.995)NIK.H	1033.5	0		2
			K.AVTDLLDEMNIK.H	1416.75	0		2
			K.ETGM(15.995)GIAEDK.V	464.194	0		2
			K.EVDLTLATGGPGMVK.S	1542.83	0		3
			K.GNSDEEKFQSLLVAIEDLK.L	2219.18	0		3
			K.HTTFFEVEPDPTLECAK.I	2076.99	0		2
			K.HTTFFEVEPDPTLECAK.I	2076.99	0		3
			K.KMGAFSQYK.Y	1142.62	0		2
			K.LAPSLTLGCGSWGGNSVSENVGVK.H	2445.24	0		3
			K.LVEDGGFGHTSSLYIDDVNQR.E	2350.13	0		2
			K.QRVPLAIMAQK.E	1309.79	0		3
			K.SAYSSGKPAIGVGAGNTPAIIDDSADIK.T	2759.44	0		3
			K.SAYSSGKPAIGVGAGNTPAIIDDSADIK.T	2759.44	0		4
			K.SIFEYLPR.A	1051.57	0		2
			K.SIKEFGVEESK.F	1335.73	0		3
			K.TCGVIEKDEAFGMTK.I	1768.87	0		2
			K.VLIGEVESVEIEEAFAHEK.L	2184.14	0		3
			R.AFIVTDTFLYNNGYTK.A	1922.99	0		2
			R.EFNPDVIISIGGGSAM(15.995)DAGK.I	1633.8	0		3
			R.EFNPDVIISIGGGSAMDAGK.I	2034.02	0		3
			R.GAYLLDKDETEK.I	1464.77	0		3
			R.GAYLLDKDETEKIR.N	1733.96	0		3
			R.ILINTPSSQGGIGDLYNFK.L	2093.12	0		2
			R.NGIIFSPHPR.A	1164.64	0		2
			R.YAEIASFLGLK.G	1266.72	0		2
WP_009898301.1	phosphopyruvate hydratase	phosphopyruvate			20	6.37	23
			K.GLACGVGDEGGFAPNLGSNR.E	1975.93	20		2
			K.LQLVGDDLFVTNTER.L	1746.92	20		2
			K.RAGYTAVISHR.S	1257.69	7.57		3
			R.AIVPSGASTGAFEAVELR.D	1801.96	7.77		3
			R.GNPTVEVEVVLEDGAMGR.A	1898.94	20		3
			R.IEEMVGEQAR.Y	1188.58	20		2
			K.GIENGVANSILVK.V	1368.8	0		2
			K.GLACGVGDEGGFAPNLGSNR.E	1975.93	0		3
			K.VNQIGTITETLDAIEM(15.995)AK.R	1774.9	0		3
			K.VNQIGTITETLDAIEMAK.R	2003.07	0		2
			K.VNQIGTITETLDAIEMAK.R	2003.07	0		3
			R.AAADEIGLPLFQYLGGVNAK.Q	2103.14	0		3
			R.AGYTAVISHR.S	1101.59	0		2
			R.AIVPSGASTGAFEAVELR.D	1801.96	0		2
			R.EALELIVEAITK.A	1383.82	0		2
			R.SGETEDSTIADLAVAVNAGQIK.T	2245.15	0		2
			R.SGETEDSTIADLAVAVNAGQIK.T	2245.15	0		3
WP_009901581.1	anaerobic ribonucleoside triphosphate reductase	anaerobic			20	0	23
			K.ANLDGFFEELDEK.I	1581.76	20		2
			K.KGEPDTEATYMGCR.T	1669.74	20		2
			K.LSEQLTQEVIK.F	1342.77	20		2
			K.MQNFAFEESYR.E	1448.64	20		2
			K.NFPFLMGQGVWK.G	1478.77	20		2
			K.RDELYLNLEK.K	1347.74	20		3
			K.TSEEYIIYR.T	1200.6	20		2
			K.VKEGINLNPEDPNYDLFK.L	2189.14	20		3
			R.AIFLAATNVAER.E	1302.73	20		2
			R.VLSNVCGSETVSGR.G	1491.74	20		2
			K.AIEEITFEDAEDADIKR.E	2021	0		2
			K.AIEEITFEDAEDADIKR.E	2021	0		3
			K.EGINLNPEDPNYDLFK.L	1933.95	0		2
			K.LIQTFDIDDELVNK.M	1717.91	0		2
			K.LIQTFDIDDELVNK.M	1717.91	0		3
			K.YSESVPSVEDIQDSVVK.V	1936.97	0		2
			R.AGAQVPFSSVNFGTDTSEEGR.M	2184.02	0		2
			R.EGIVPDYK.L	975.528	0		2
			R.GLGNGETPIFPILIFK.V	1772.03	0		2
			R.NEDESDIKFER.I	1436.68	0		2
WP_009901692.1	chaperonin GroEL	chaperonin			20	0	3
			K.HQVEQTTSDFDREK.L	1774.85	20		3
			K.AVTVAVEELK.N	1113.66	0		2
			K.NVTAGANPILLR.K	1265.75	0		2
WP_009902143.1	formate C-acetyltransferase	formate			20	0	234
			-.MNAWQGFK.T	1036.52	20		2
			K.EAVQWLYFGYLGAVK.D	1799.97	20		2
			K.EAVQWLYFGYLGAVK.D	1799.97	20		3
			K.ELETIVGLQTDAPLKR.A	1839.05	20		3
			K.EQQLDVINR.T	1141.61	20		2
			K.KLWDEAMVLFK.K	1462.83	20		2
			K.KSLEVSCMDEEVIR.L	1749.86	20		2
			K.LPYEHAQDGISNTFSIVPGALGK.D	2470.29	20		2
			K.LPYEHAQDGISNTFSIVPGALGK.D	2470.29	20		3
			K.LWDEAMVLFK.K	1306.7	20		2
			K.MAESYGFDISKPATNSK.E	1929.96	20		2
			K.MAESYGFDISKPATNSK.E	1929.96	20		3
			K.MVENSCEAFGYELDPEIK.D	2186.99	20		2
			K.MVENSCEAFGYELDPEIKDIFTK.Y	2819.35	20		3
			K.QMQFFGAR.V	1011.5	20		2
			K.SGIITGLPDAYGR.G	1346.72	20		2
			K.SLEVSCMDEEVIR.L	1593.74	20		2
			K.TLLYAINGGVDEK.S	1447.79	20		2
			K.VSIDTSSVQYENDDLMR.A	1999.92	20		2
			K.VSIDTSSVQYENDDLMR.A	1999.92	20		3
			K.YGNNDDRVDSIAVELVESFMNK.I	2571.24	20		3
			K.YGNNDDRVDSIAVELVESFMNK.I	2571.24	20		4
			R.AGAPFAPGANPMHGR.D	1477.72	20		3
			R.AVMPYGGIK.M	990.557	20		2
			R.AYWGDDYGIACCVSAMR.I	2022.85	20		2
			R.AYWGDDYGIACCVSAMR.I	2022.85	20		3
			R.DTNGALASLSSVAK.L	1388.75	20		2
			R.EFIQLNYSPYEGNDSFLAGATENTK.K	2864.36	20		2
			R.EFIQLNYSPYEGNDSFLAGATENTK.K	2864.36	20		3
			R.EFIQLNYSPYEGNDSFLAGATENTKK.L	3020.48	20		3
			R.ENGGTLDVDTK.T	1203.6	20		2
			R.FEPITSEYLDYDEVMSK.F	2121.99	20		2
			R.FEPITSEYLDYDEVMSK.F	2121.99	20		3
			R.KSGIITGLPDAYGR.G	1502.85	20		2
			R.KSGIITGLPDAYGR.G	1502.85	20		3
			R.LREEITEQISALNELK.K	1942.08	20		3
			R.LREEITEQISALNELKK.M	2098.21	20		3
			R.LREEITEQISALNELKK.M	2098.21	20		4
			R.MLNTLYTLGPSPEPNLTVLWSTK.L	2631.41	20		3
			R.NSYPTQSILTITSNVVYGK.K	2141.14	20		2
			R.NSYPTQSILTITSNVVYGK.K	2141.14	20		3
			R.RAGAPFAPGANPMHGR.D	1633.83	20		3
			R.TSTFLDIYFER.D	1418.71	20		2
			R.VALYGVDALIEDKNEQK.K	1989.09	20		3
			R.VALYGVDALIEDKNEQKK.S	2145.21	20		3
			R.VALYGVDALIEDKNEQKK.S	2145.21	20		4
			R.VDSIAVELVESFMNK.I	1735.91	20		2
			K.AGIVTEEELQEYMDHFVM(15.995)K.L	2168.98	0		3
			K.AGIVTEEELQEYMDHFVMK.L	2325.11	0		3
			K.ELETIVGLQTDAPLKR.A	1839.05	0		2
			K.KMAESYGFDISKPATNSK.E	2086.09	0		3
			K.KMAESYGFDISKPATNSK.E	2086.09	0		4
			K.KSLEVSCMDEEVIR.L	1749.86	0		3
			K.M(15.995)VENSCEAFGYELDPEIK.D	177.082	0		2
			K.M(15.995)VENSCEAFGYELDPEIKDIFTK.Y	177.082	0		3
			K.MVENSCEAFGYELDPEIK.D	2186.99	0		3
			K.SLEVSCM(15.995)DEEVIR.L	852.372	0		2
			K.THNQGVFDVYTPEMR.A	1820.85	0		2
			K.THNQGVFDVYTPEMR.A	1820.85	0		3
			K.TLLYAINGGVDEK.S	1447.79	0		3
			K.TVSGIAAYAPGYLDK.E	1580.85	0		2
			K.TVSGIAAYAPGYLDKELETIVGLQTDAPLKR.A	3373.86	0		4
			K.VSIDTSSVQYENDDLM(15.995)R.A	1842.82	0		2
			K.VSIDTSSVQYENDDLM(15.995)R.A	1842.82	0		3
			K.YGNNDDRVDSIAVELVESFM(15.995)NK.I	2301.07	0		3
			K.YSYEALEMALHDR.D	1624.76	0		3
			R.AGAPFAPGANPM(15.995)HGR.D	1127.54	0		3
			R.ATLEDAM(15.995)EHPEEYPQLTIR.V	777.358	0		3
			R.DTNGALASLSSVAK.L	1388.75	0		3
			R.FEPITSEYLDYDEVM(15.995)SK.F	1878.83	0		2
			R.FEPITSEYLDYDEVM(15.995)SK.F	1878.83	0		3
			R.INNLSAMMDGYFAQNAHHLNVNVFDR.A	3019.43	0		4
			R.M(15.995)LNTLYTLGPSPEPNLTVLWSTK.L	177.082	0		3
			R.MLNTLYTLGPSPEPNLTVLWSTK.L	2631.41	0		2
			R.NEQGIAVDFEIEGDYPK.Y	1979.96	0		2
			R.RAGAPFAPGANPM(15.995)HGR.D	1283.64	0		3
			R.RAGAPFAPGANPMHGR.D	1633.83	0		2
			R.RAGAPFAPGANPMHGR.D	1633.83	0		4
			R.RVALYGVDALIEDKNEQKK.S	2301.31	0		4
			R.TM(15.995)ACGMAGLSVCADSLSAIK.H	278.13	0		2
			R.TMACGM(15.995)AGLSVCADSLSAIK.H	697.26	0		2
			R.TMACGM(15.995)AGLSVCADSLSAIK.H	697.26	0		3
			R.TMACGMAGLSVCADSLSAIK.H	2099	0		3
			R.TPDYNNLFSGDPTWVTECIGGM(15.995)GIDGR.T	2502.09	0		3
			R.TPDYNNLFSGDPTWVTECIGGMGIDGR.T	3000.35	0		3
			R.VALYGVDALIEDK.N	1460.81	0		2
			R.VALYGVDALIEDKNEQK.K	1989.09	0		2
			R.VALYGVDALIEDKNEQKK.S	2145.21	0		2
WP_009902397.1	Fe-S cluster assembly scaffold protein NifU	Fe-S			20	0	23
			K.IFLDIDGDVIKDVK.F	1672.97	20		3
			R.NMGEIDNASGVGEVGNPTCGDIMK.I	2521.13	20		2
			K.AALIDYAQK.N	1047.6	0		2
			K.AVAEALDGLPPVK.M	1334.78	0		3
			K.TFGCGSAIASSSMATEMIK.G	2004.94	0		2
			R.NMGEIDNASGVGEVGNPTCGDIMK.I	2521.13	0		3
WP_009902521.1	cell wall-binding protein Cwp20	cell			20	0	3
			R.MLLNHSSGLMGSSFK.N	1663.84	20		3
			K.ENSGLYASSNMIK.V	1468.72	0		2
			K.IMDENNSNAFIEIPGVIGR.D	2117.07	0		2
			K.NAPILLTGSSQINEK.T	1639.91	0		2
WP_009903219.1	histidinol-phosphate aminotransferase family protein	histidinol-phosphate			20	0	23
			K.DFIALDTYR.I	1140.58	20		2
			K.ISTPYEVSEISR.S	1407.72	20		2
			K.KISTPYEVSEISR.S	1563.85	20		3
			K.LLNNYDNVIALK.T	1444.83	20		2
			K.NKDIDLQQEFAK.L	1531.82	20		2
			K.NKDIDLQQEFAK.L	1531.82	20		3
			K.NLNIAETSDTVSIMTVEHK.N	2158.1	20		3
			K.VLGYSPQFSEYETDIK.M	1931.96	20		2
			K.VLGYSPQFSEYETDIK.M	1931.96	20		3
			R.VISGSDFTGLDK.N	1293.68	20		2
			K.AFQIIDNIE.-	1089.57	0		2
			K.AIEMQLK.K	887.515	0		2
			K.DIDLQQEFAK.L	1261.66	0		2
			K.ELPEVIK.A	882.543	0		2
			K.GFGLAGLR.A	817.481	0		2
			K.MHGATYDYVLLK.K	1465.76	0		3
			K.NLNIAETSDTVSIM(15.995)TVEHK.N	1534.75	0		3
			K.SYAIESGHSEDVFEIDCGEGINTVSYSNK.A	3263.46	0		3
			K.YDIAVMVDEAYGEYMPK.E	2049.95	0		2
			K.YDIAVMVDEAYGEYMPK.E	2049.95	0		3
			R.AGYAVLPEQLVSPIK.K	1639.95	0		3
			R.AGYAVLPEQLVSPIKK.I	1797.08	0		3
			R.ICLADGSIHVIYLLNR.L	1885.03	0		3
			R.VISGSDFTGLDKNFIR.F	1824.98	0		3
WP_009903252.1	DUF4091 domain-containing protein	DUF4091			20	0	2
			K.AGDMFFVYPGK.D	1286.64	20		2
			R.NVVLNPLDESK.F	1282.71	0		2
WP_009903738.1	pyruvate kinase	pyruvate			20	0	2
			K.IENQEGVENLDEILK.V	1797.94	20		2
			R.TGNFEDPEVFLEEGQK.F	1894.9	20		2
			R.EVLENNNATDIQIISK.I	1855.99	0		2
			R.GDLGVEIPTEEMPIVQK.M	1911.01	0		2
WP_009903754.1	porphobilinogen synthase	porphobilinogen			20	0	23
			K.AGADMVAPSDMMDGR.I	1550.65	20		2
			R.EAAHSAPSFGDRK.T	1427.72	20		3
WP_003417102.1	ATP-dependent Clp endopeptidase proteolytic subunit ClpP	ATP-dependent			0	0	23
			K.EYGLIDEVFTK.R	1368.72	0		2
			K.IKETLNEILSER.T	1499.86	0		3
WP_003419338.1	30S ribosomal protein S16	30S			0	0	2
			K.FIEEIGYYNPISEPK.Q	1854.95	0		2
			K.WLATGAQPTEVVK.K	1454.81	0		2
WP_003419350.1	50S ribosomal protein L19	50S			0	0	23
			K.MSFNVGVER.T	1065.53	0		2
			K.NEVPNFGPGDTVK.V	1428.72	0		2
			R.AIEQEQLKNEVPNFGPGDTVK.V	2397.26	0		3
			R.IQVFEGVVLK.R	1186.73	0		2
			R.IQVFEGVVLKR.Q	1342.83	0		3
WP_003420701.1	phosphate butyryltransferase	phosphate			0	0	23
			K.IANAILVGDIEK.T	1310.78	0		2
			R.TGNVLSHVAVFDVEGYDR.L	2005.99	0		3
WP_003421121.1	30S ribosomal protein S4	30S			0	0	2
			K.AGENLLSLLER.R	1241.7	0		2
			K.VGDVIEVK.E	913.548	0		2
			R.IYGVLETQFR.N	1252.68	0		2
WP_003421155.1	50S ribosomal protein L14	50S			0	0	2
			K.IVSLAPEVL.-	967.595	0		2
			R.YGNIGDVIVATVK.S	1403.8	0		2
WP_003421188.1	50S ribosomal protein L1	50S			0	0	23
			K.AKEAEQAGADFVGAEELVQK.I	2174.13	0		3
			K.EAEQAGADFVGAEELVQK.I	1946.97	0		2
WP_003426456.1	thioether cross-link-forming SCIFF peptide maturase	thioether			0	0	2
			K.AAIDYLIANSGSR.K	1377.73	0		2
			K.MANIFDEEIVLPENLK.N	1931.02	0		2
WP_003427723.1	50S ribosomal protein L24	50S			0	0	23
			K.EAPIHISNVMPFDPETGKGVR.V	2350.22	0		2
			K.HQKPSAMNQQGGIINK.E	1833.99	0		3
			K.KGDTVVVIAGK.D	1169.74	0		2
WP_003428573.1	electron transfer flavoprotein subunit alpha/FixB family pr	electron			0	0	2
			K.AADPIVVLFGATSIGR.D	1613.91	0		2
			K.VSALLLGSK.V	942.611	0		2
WP_003430159.1	NifB/NifX family molybdenum-iron cluster-binding protein	NifB/NifX			0	0	23
			K.ALSGTAVDAVVVGGIGQGAIIK.L	2052.2	0		2
			K.ALSGTAVDAVVVGGIGQGAIIK.L	2052.2	0		3
			K.SLDNGDLDHEHGK.C	1491.7	0		3
WP_003430209.1	Mrp/NBP35 family ATP-binding protein	Mrp/NBP35			0	0	2
			K.AYSDGSYIYPVENSNNIK.V	2090	0		2
			K.STVTALLANK.L	1072.65	0		2
WP_003430704.1	transketolase	transketolase			0	0	23
			K.GFFPEEELITLR.K	1477.78	0		2
			K.GHAAPALYATLAEK.G	1467.81	0		3
WP_003434033.1	thioredoxin-disulfide reductase	thioredoxin-disulfide			0	0	2
			K.NIYGGQVASTSEVENYPAVQK.I	2310.16	0		2
			R.AGLSVTVFEK.N	1105.64	0		2
WP_003434963.1	lysine--tRNA ligase	lysine--tRNA			0	0	23
			K.AGFIDIQDQEGR.I	1375.67	0		2
			K.EYSGVDFSTINTDEEALEVAR.E	2373.11	0		3
			R.ELGDDEAFEMDEDFLK.A	1958.85	0		2
			R.YVDLIVNPEVK.N	1343.77	0		2
WP_003435673.1	50S ribosomal protein L5	50S			0	0	23
			K.EQLIFPEIEYDKIDK.V	1964.06	0		3
			K.NVMEIPK.L	885.499	0		2
			R.GMDIIFVTTAK.T	1250.69	0		2
WP_003436882.1	aminoacyl-histidine dipeptidase	aminoacyl-histidine			0	0	23
			K.ESTIEFLTSVR.S	1308.69	0		2
			K.GISDFLLSFGK.N	1238.69	0		2
			R.VLSVLNVDYELASVDGGTK.H	2035.09	0		2
			R.VLSVLNVDYELASVDGGTK.H	2035.09	0		3
WP_003437525.1	NUDIX hydrolase	NUDIX			0	0	2
			K.ILGGGLPYESAVQR.V	1486.81	0		2
			K.MIDVAGDTMYEFFSR.S	1808.81	0		2
WP_003437537.1	YebC/PmpR family DNA-binding transcriptional regulator	YebC/PmpR			0	0	23
			K.EGGADPEYNAALK.T	1389.68	0		2
			K.MIPQTTTVLTEESHLK.M	1884.01	0		3
WP_003438268.1	GTP-sensing pleiotropic transcriptional regulator CodY	GTP-sensing			0	0	3
			K.ILEIFPEEHGR.L	1366.72	0		3
			K.VLGLHLNDVQDSSVIEDEYTK.Q	2430.24	0		3
WP_003438316.1	polyribonucleotide nucleotidyltransferase	polyribonucleotide			0	0	23
			R.ALLPVIPSQEEFPYAIR.L	1971.09	0		2
			R.ALLPVIPSQEEFPYAIR.L	1971.09	0		3
			R.DGIDFFPLSVDYEEK.L	1829.88	0		2
WP_003439524.1	argininosuccinate synthase	argininosuccinate			0	0	23
			K.AYVDDISEEFVTETIFK.A	2062.02	0		2
			K.SREDAIDYAEK.H	1351.66	0		3
			R.ESIDAFMEQTQDNVTGTVK.V	2169.03	0		2
			R.FEATIAALDPTIK.V	1444.82	0		2
			R.FEATIAALDPTIK.V	1444.82	0		3
WP_004454140.1	aspartate--tRNA ligase	aspartate--tRNA			0	0	23
			K.QLLMVSGMDR.Y	1176.6	0		2
			K.YGTPPHAGLAFGLDR.L	1598.82	0		3
WP_009887887.1	50S ribosomal protein L4	50S			0	0	23
			K.VQNSEVIVLDALNMDAPK.T	2012.07	0		2
			K.VQNSEVIVLDALNMDAPK.T	2012.07	0		3
			K.YDSFIITTDAVK.K	1427.75	0		2
WP_009888868.1	acetyl-CoA C-acetyltransferase	acetyl-CoA			0	0	2
			K.IMGYGPVPATK.K	1188.66	0		2
			K.SVSAVELGVTAAK.E	1286.74	0		2
			R.ILTTLLYEMK.R	1279.75	0		2
WP_009889364.1	tyrosine--tRNA ligase	tyrosine--tRNA			0	0	23
			K.GVDDLIDEK.E	1058.55	0		2
			R.EIVTLYHGEESAK.E	1530.79	0		3
WP_009889571.1	nucleoside hydrolase	nucleoside			0	0	234
			K.AFENLDEFVSMGGAFR.I	1817.85	0		2
			K.LVTAQDTHGEDGIGENFYQK.V	2278.09	0		3
			R.KLVTAQDTHGEDGIGENFYQK.V	2434.22	0		4
WP_009897922.1	phosphoenolpyruvate--protein phosphotransferase	phosphoenolpyruvate--protein			0	0	2
			K.SIDNVEAEIAK.L	1243.67	0		2
			K.TESVNAEYALNEIK.E	1635.84	0		2
WP_009897948.1	cell wall-binding cysteine protease Cwp84	cell			0	0	2
			K.TLLTDTDNYAMK.S	1440.72	0		2
			K.VTAANVFDFSR.D	1253.64	0		2
WP_009897956.1	cell wall-binding protein Cwp2	cell			0	0	23
			K.ATELTVESTNEK.D	1376.7	0		2
			K.GEADAMSIAAK.A	1118.56	0		2
			K.IYIVGGESAVSNTAK.K	1563.85	0		2
			K.KAPILLASDNEIPK.V	1591.95	0		3
			K.LVDGLAATPLAQSK.K	1438.84	0		2
			K.VDLTANPVDSTGTNLDPSAEGFR.V	2404.16	0		2
			K.YTGGSQVGQPIYEIK.V	1694.89	0		2
WP_009901787.1	putative manganese-dependent inorganic diphosphatase	putative			0	0	23
			K.EGSYLIYK.A	1027.56	0		2
			K.INGVSVVSVESDNYK.T	1664.86	0		2
			K.LLILTNHTEISK.D	1436.86	0		3
			K.TLPVTYDDGTFAGIITMK.E	1999.04	0		2
			K.VVPLTPTSSILEAYNLMDEK.N	2276.21	0		3
			K.YAMDMFK.C	960.445	0		2
WP_009902717.1	radical SAM protein	radical			0	0	2
			K.IGVETFDNYFR.N	1387.68	0		2
			R.EYFEIPVVFK.I	1325.73	0		2
WP_009903195.1	glycine--tRNA ligase subunit beta	glycine--tRNA			0	0	2
			K.LSADILDSLGLVDEK.A	1642.9	0		2
			R.FAGDILPK.T	915.543	0		2
WP_009903243.1	CoA-disulfide reductase	CoA-disulfide			0	0	23
			K.FISDYNQTHYYPGR.N	1788.83	0		3
			K.NIVSNENVYVPLATGANK.L	1959.05	0		2
WP_009904144.1	rod shape-determining protein	rod			0	0	23
			K.EVLAVGEEAKK.M	1255.74	0		3
			K.SVEDQEIFEK.V	1278.63	0		2
WP_025992040.1	2,3-bisphosphoglycerate-independent phosphoglycerate mutase	2,3-bisphosphoglycerate-independent			0	0	234
			K.VYVHAFTDGRDTDPQSALEYAK.E	2539.24	0		4
			R.ALVCEEFDGFKR.E	1525.76	0		3
			R.LLIPSPK.V	822.558	0		2
contaminant_KERATIN04	no description	no			0	0	23
			K.ILTATIENNR.V	1171.66	0		2
			K.TRLEQEIATYR.S	1406.75	0		3
			R.ALEEANADLEVK.I	1356.71	0		2
			R.QSVEADINGLR.R	1228.64	0		2
			R.QSVEADINGLRR.V	1384.74	0		3
			R.VILEIDNAR.L	1069.61	0		2
			R.VLDELTLSK.T	1072.64	0		2
contaminant_KERATIN23	no description	no			0	0	2
			G.SSCGGCDSSCGSCGSGCR.G	1924.62	0		2
			S.SCCKPCCSSSGCGSSCCQSSCCK.P	2835.99	0		2
contaminant_KERATIN13	no description	no			0.45	0.1	23
			K.AEAESLYQSK.Y	1180.6	0.38		2
			K.DVDGAYMTK.V	1054.5	0.54		2
			K.LNDLEDALQQAK.E	1412.75	0.49		2
			K.NMQDMVEDYR.N	1327.55	0.29		2
			K.QISNLQQSISDAEQR.G	1743.88	0.48		2
			K.SKAEAESLYQSK.Y	1423.76	0.44		2
			K.SKAEAESLYQSK.Y	1423.76	0.43		3
			K.SLNNQFASFIDK.V	1438.75	0.55		2
			K.YEELQITAGR.H	1206.62	0.4		2
			R.FLEQQNQVLQTK.W	1530.84	0.57		2
			R.FLEQQNQVLQTK.W	1530.84	0.45		3
			R.GGGGGGYGSGGSSYGSGGGSYGSGGGGGGGR.G	2411.98	0.55		2
			R.GGGGGGYGSGGSSYGSGGGSYGSGGGGGGGR.G	2411.98	0.58		3
			R.NKYEDEINKR.T	1391.74	0.44		3
			R.TLLEGEESR.M	1060.54	0.72		2
			R.TNAENEFVTIK.K	1320.69	0.44		2
			R.TNAENEFVTIKK.D	1476.82	0.39		3
			K.AEAESLYQSKYEELQITAGR.H	2342.18	0		3
			K.DVDGAYM(15.995)TK.V	797.327	0		2
			K.SKAEAESLYQSKYEELQITAGR.H	2585.34	0		3
			K.SKAEAESLYQSKYEELQITAGR.H	2585.34	0		4
			R.DYQELMNTK.L	1196.57	0		2
			R.LLRDYQELMNTK.L	1578.84	0		3
			R.LRSEIDNVKK.Q	1284.78	0		3
			R.THNLEPYFESFINNLR.R	2022	0		3
			R.TNAENEFVTIKK.D	1476.82	0		2
contaminant_KERATIN21	no description	no			0.47	0.25	23
			K.AQYEEIAQR.S	1134.57	0.47		2
			K.NKYEDEINKR.T	1391.74	0.44		3
			R.NLDLDSIIAEVK.A	1384.78	0.89		2
			K.ADTLTDEINFLR.A	1434.74	0		2
contaminant_KERATIN02	no description	no			0.48	0.17	234
			K.TLLDIDNTR.M	1087.59	0.48		2
			K.VQALEEANNDLENK.I	1641.82	0.75		2
			R.FSSSSGYGGGSSR.V	1262.55	0.49		2
			R.GGGGSFGYSYGGGSGGGFSASSLGGGFGGGSR.G	2733.19	0.42		2
			R.GGGGSFGYSYGGGSGGGFSASSLGGGFGGGSR.G	2733.19	0.45		3
			R.GGSGGSYGGGGSGGGYGGGSGSR.G	1818.75	0.56		2
			R.GGSGGSYGGGSGSGGGSGGGYGGGSGGGHSGGSGGGHSGGSGGNYGGGSGSGGGSGGGYGGGSGSR.G	5001.97	0.59		4
			R.IKFEMEQNLR.Q	1362.73	0.16		3
			R.QEYEQLIAK.N	1176.64	0.49		2
			R.QGVDADINGLR.Q	1184.62	0.21		2
			K.DIENQYETQITQIEHEVSSSGQEVQSSAK.E	3320.57	0		3
			K.EIETYHNLLEGGQEDFESSGAGK.I	2566.19	0		2
			K.EIETYHNLLEGGQEDFESSGAGK.I	2566.19	0		3
			K.TLNDM(15.995)RQEYEQLIAK.N	620.284	0		3
			K.VQALEEANNDLENK.I	1641.82	0		3
			R.GGSGGSHGGGSGFGGESGGSYGGGEEASGSGGGYGGGSGKSSHS.-	3677.5	0		4
			R.HGVQELEIELQSQLSK.K	1894.02	0		3
			R.LASYLDKVQALEEANNDLENK.I	2461.28	0		3
			R.QVLDNLTM(15.995)EK.S	960.495	0		2
			R.QVLDNLTMEK.S	1245.66	0		2
contaminant_KERATIN22	no description	no			0.54	0.23	23
			K.AQYEEIAQR.S	1134.57	0.47		2
			K.GGSISGGGYGSGGGK.H	1252.6	0.34		2
			K.VDPEIQNVK.A	1096.61	0.92		2
			K.YEELQVTVGR.H	1220.64	0.38		2
			R.FLEQQNQVLQTK.W	1530.84	0.57		2
			R.FLEQQNQVLQTK.W	1530.84	0.45		3
			R.GGSGGGGSISGGGYGSGGGSGGR.Y	1768.77	0.88		2
			R.HGGGGGGFGGGGFGSR.S	1347.61	0.51		3
			R.NLDLDSIIAEVK.A	1384.78	0.89		2
			R.TAAENDFVTLK.K	1263.67	0.82		2
			K.DVDNAYMIK.V	1123.56	0		2
			K.HSSGGGSRGGSSSGGGYGSGGGGSSSVK.G	2370.06	0		3
			K.VDLLNQEIEFLK.V	1515.85	0		2
			R.GFSSGSAVVSGGSR.R	1281.63	0		2
			R.GGSSSGGGYGSGGGGSSSVK.G	1643.74	0		2
			R.GSSSGGGYSSGSSSYGSGGR.Q	1767.73	0		2
			R.LQGEIAHVKK.Q	1205.75	0		3
			R.SKEEAEALYHSK.Y	1474.77	0		3
			R.TAAENDFVTLKK.D	1419.8	0		3
			R.TSQNSELNNM(15.995)QDLVEDYKK.K	1164.51	0		3
			R.YLDGLTAER.T	1064.55	0		2
contaminant_KERATIN05	no description	no			0.66	0	2
			K.VTMQNLNDR.L	1117.56	0.66		2
			K.TRLEQEIATYR.R	1406.75	0		3
			R.ALEEANADLEVK.I	1356.71	0		2
			R.GQVGGDVNVEM(15.995)DAAPGVDLSR.I	1131.52	0		2
			R.LLEGEDAHLSSSQFSSGSQSSR.D	2337.09	0		3
contaminant_KERATIN08	no description	no			0.66	0	2
			K.VTMQNLNDR.L	1117.56	0.66		2
			K.TRLEQEIATYR.R	1406.75	0		3
			R.ALEEANADLEVK.I	1356.71	0		2
			R.GQTGGDVNVEM(15.995)DAAPGVDLSR.I	1133.5	0		2
contaminant_KERATIN17	no description	no			0.66	0.32	23
			K.NKYEDEINKR.T	1391.74	0.44		3
			R.NLDLDSIIAEVK.A	1384.78	0.89		2
			K.YEELQQTAGR.H	1221.6	0		2
			R.SFSTASAITPSVSR.T	1437.75	0		2
contaminant_KERATIN03	no description	no			0.7	0.2	23
			K.GSLGGGFSSGGFSGGSFSR.G	1734.8	0.55		2
			K.IRLENEIQTYR.S	1461.79	0.63		2
			K.IRLENEIQTYR.S	1461.79	0.74		3
			K.QSLEASLAETEGR.Y	1417.7	0.91		2
			K.VTMQNLNDR.L	1117.56	0.66		2
			R.ALEESNYELEGK.I	1436.7	0.53		2
			R.LENEIQTYR.S	1192.61	0.82		2
			R.LKYENEVALR.Q	1289.73	0.82		3
			R.SLLEGEGSSGGGGR.G	1289.62	0.9		2
			R.SQYEQLAEQNR.K	1392.66	0.7		2
			R.SQYEQLAEQNRK.D	1548.79	0.33		2
			R.SQYEQLAEQNRK.D	1548.79	0.34		3
			R.VLDELTLTK.A	1086.65	0.89		2
			K.DAEAWFNEK.S	1164.55	0		2
			R.ISSSKGSLGGGFSSGGFSGGSFSR.G	2266.11	0		3
			R.LKYENEVALR.Q	1289.73	0		2
			R.NVSTGDVNVEM(15.995)NAAPGVDLTQLLNNMR.S	1191.54	0		3
			R.QSVEADINGLR.R	1228.64	0		2
			R.QSVEADINGLRR.V	1384.74	0		3
contaminant_gi	pepsin A (EC 3.4.23.1) precursor - pig	pepsin			0.87	0	2
			R.QYYTVFDR.A	1118.54	0.87		2

## Sheet: Probe 2_competition
Replicate 1 : probe 2–C. difficile–competition
Accession	description	symbol	sequence	mass	median ratio	standard deviation	charge
WP_009895182.1	proline--tRNA ligase	proline--tRNA			0.33	0.07	23
			K.AFDITFADR.E	1082.54	0.55		2
			K.ALCEELLAMPVVAGQK.S	1783.96	0.35		3
			K.ALEEKPGFIK.T	1214.73	0.35		2
			K.ALEEKPGFIK.T	1214.73	0.41		3
			K.DIENNQAMVFR.R	1363.66	0.34		2
			K.FNEWEMK.G	1038.48	0.29		2
			K.GVAVEVDDRDNYTTGWK.F	1980.96	0.26		3
			K.KGNVMETVDK.I	1203.65	0.28		2
			K.MEDDFPQWYTDVITK.T	1943.91	0.33		2
			K.QFVEEITK.M	1048.58	0.3		2
			K.TDLVDYAPVK.G	1175.64	0.3		2
			R.EDNTSIVENMDEFRK.A	1881.88	0.35		3
			R.LIGGLIMTHSDNR.G	1453.77	0.3		2
			R.LIGGLIMTHSDNR.G	1453.77	0.3		3
			R.TYTIEAMMHDGK.A	1451.68	0.3		3
			R.VAPIQVVIVPIAAK.K	1472.97	0.34		2
			R.VAPIQVVIVPIAAK.K	1472.97	0.35		3
			K.ALCEELLAMPVVAGQK.S	1783.96	0		2
			K.ALQSGTSHFLGQHFTK.A	1814.95	0		3
			K.ALQSGTSHFLGQHFTK.A	1814.95	0		4
			K.EAEHVEGFAPEVAWVTHGGNK.K	2320.13	0		4
			K.GNVMETVDK.I	1047.53	0		2
			K.GVAVEVDDRDNYTTGWK.F	1980.96	0		2
			K.GVPVRVEIGPK.D	1205.75	0		3
			K.M(15.995)EDDFPQWYTDVITK.T	177.082	0		2
			K.TMWCGDAECEAK.I	1512.6	0		2
			R.CLPFEQENLGHK.C	1526.76	0		2
			R.CLPFEQENLGHK.C	1526.76	0		3
			R.EDNTSIVENMDEFR.K	1725.75	0		2
			R.EDNTSIVENMDEFRK.A	1881.88	0		2
			R.EGNLANPYHTSWGASTR.L	1888.89	0		2
			R.EGNLANPYHTSWGASTR.L	1888.89	0		3
			R.ELPYLYNQWCSVVR.W	1854.92	0		2
			R.LCVRPTSETIICTMYAK.W	2099.07	0		3
			R.TYTIEAMMHDGK.A	1451.68	0		2
WP_004454985.1	ABC transporter substrate-binding protein	ABC			1.04	9.5	2
			K.GNLVNYLAEK.V	1175.65	1.02		2
			K.ITLPTASESFLYGISK.I	1782.98	0.96		2
			R.GMFETGQYCNQTK.Y	1618.71	20		2
			R.QALSYALNR.N	1062.58	1.05		2
			K.DAKPSPAILFEDWSK.L	1787.95	0		3
			K.DAPIYTIDYEQNLMAAQK.N	2140.06	0		2
			K.DAPIYTIDYEQNLMAAQK.N	2140.06	0		3
			K.EDSLASNIVYAPLYTYEK.G	2132.08	0		2
			K.GFTELNK.E	863.475	0		2
			K.HVFEGESNIAK.S	1285.67	0		2
			K.ITLPTASESFLYGISK.I	1782.98	0		3
			K.NYALVAQQELK.K	1331.74	0		2
			K.NYALVAQQELKK.I	1487.87	0		2
			K.QIQQDISK.D	1014.57	0		2
			R.LNYIVFNQNISNMANK.E	1939.01	0		2
			R.QYLLVGEKPVKVEK.I	1742.08	0		4
WP_003429730.1	50S ribosomal protein L20	50S			1.07	0.16	23
			K.LSGVEVNRK.M	1056.63	1.07		2
			K.LYRPANTFVMK.A	1394.77	1.05		3
			K.MLSEMAIQDPEGFAK.L	1721.84	1.33		2
			K.LYRPANTFVMK.A	1394.77	0		2
			K.M(15.995)LSEM(15.995)AIQDPEGFAK.L	177.082	0		2
WP_003428889.1	carboxymuconolactone decarboxylase family protein	carboxymuconolactone			1.13	0	2
			K.IGVIGGGSITYPNAR.F	1501.83	1.13		2
			R.VFGSLDDKTYSEGAISK.K	1900.99	0		2
WP_003436176.1	30S ribosomal protein S12	30S			1.22	13.28	23
			R.GTLDTAGVDKR.R	1187.65	1.22		2
			R.GTLDTAGVDKR.R	1187.65	20		3
WP_009897948.1	cell wall-binding cysteine protease Cwp84	cell			1.27	0.16	2
			K.MYQLEYAGLSK.I	1357.7	1.39		2
			K.TLLTDTDNYAMK.S	1440.72	1.16		2
			K.GAIVVVIDNTANPNR.E	1579.87	0		2
			K.TSSGQATSGESLTGADRYETAVK.V	2372.15	0		3
			K.VTAANVFDFSR.D	1253.64	0		2
WP_003420072.1	NADPH-dependent glutamate synthase	NADPH-dependent			1.28	10.82	23
			K.EGVFAGGDAVTGAATVISAMGAGK.T	2193.12	1.24		3
			K.IKEDDIEGAAK.V	1271.7	1.28		3
			K.VAVVGGGNVAMDAAR.T	1413.74	20		2
			K.EGVFAGGDAVTGAATVISAMGAGK.T	2193.12	0		2
WP_003428740.1	acetyl-CoA carboxylase biotin carboxyl carrier protein	acetyl-CoA			1.29	0.19	23
			-.MNINEIKELLK.A	1427.84	1.4		2
			-.MNINEIKELLK.A	1427.84	1.35		3
			K.AIDSTNLEYVK.L	1307.7	1.17		2
			K.GEIIEVLVSNEELVEYNQPLFK.I	2618.39	0.87		3
			K.LESSDLR.L	846.445	1.11		2
			K.LESSDLRLEVSK.K	1430.8	1.4		2
			K.LESSDLRLEVSK.K	1430.8	1.29		3
			-.MNINEIK.E	916.505	0		2
			K.AIDSTNLEYVK.L	1307.7	0		3
			K.AQSTSSPVLSVQQESVVDLSLEK.P	2487.31	0		2
			K.GEIIEVLVSNEELVEYNQPLFK.I	2618.39	0		2
			L.M(15.995)GTFYDSPSPDADSFVK.V	177.082	0		2
			L.MGTFYDSPSPDADSFVK.V	1919.87	0		2
WP_009902521.1	cell wall-binding protein Cwp20	cell			1.29	0	2
			K.GVPVNYSLVTK.N	1231.72	1.29		2
			K.ATLALSDETPGYIVNTK.I	1848.99	0		2
			K.ENSGLYASSNMIK.V	1468.72	0		2
			K.IDDNNISNSVK.E	1273.65	0		2
			K.NAPILLTGSSQINEK.T	1639.91	0		2
			K.NVYVVGGEASINEK.S	1533.8	0		2
			K.SPVMLVGNSLDYNQK.E	1719.89	0		2
WP_003421156.1	30S ribosomal protein S17	30S			1.31	0	2
			R.LVEVVEK.V	870.543	1.31		2
			K.IMETRPLSK.D	1129.65	0		2
WP_003421168.1	50S ribosomal protein L2	50S			1.34	0.11	234
			K.ATIGQVGNIEHGNVVIGK.A	1862.05	1.13		2
			K.ATIGQVGNIEHGNVVIGK.A	1862.05	1.26		3
			R.GSVMNPNDHPHGGGEGR.S	1744.77	1.34		3
			R.GSVMNPNDHPHGGGEGR.S	1744.77	1.34		4
			R.TANIALLNYADGEKR.Y	1703.92	1.45		2
			R.TANIALLNYADGEKR.Y	1703.92	1.37		3
			R.GSVMNPNDHPHGGGEGR.S	1744.77	0		2
			R.LVSINCK.A	888.51	0		2
			R.QMTVLVSDEITCNQPEK.S	2048	0		2
			R.SAGVSAQLM(15.995)AK.E	890.453	0		2
			R.SAGVSAQLMAK.E	1117.62	0		2
			R.TANIALLNYADGEK.R	1547.82	0		2
WP_003425597.1	pyruvate carboxylase	pyruvate			1.35	0.22	234
			K.ADESYLIGEGK.G	1236.62	1.29		2
			K.ADMNDPLQIGASIPGK.V	1681.87	1.26		2
			K.ADMNDPLQIGASIPGK.V	1681.87	1.28		3
			K.AFGEDIIFIEK.Y	1336.73	1.41		2
			K.DMSGLLKPYSAYTLVK.E	1870.04	1.69		2
			K.DMSGLLKPYSAYTLVK.E	1870.04	1.64		3
			K.EANEVVGDIIK.V	1241.69	1.27		2
			K.EICEDAVK.L	1018.5	1.02		2
			K.EKPLFDALHDPR.M	1492.8	1.01		2
			K.EKPLFDALHDPR.M	1492.8	1.33		3
			K.EVNVQTIPGVEK.A	1367.77	1.44		2
			K.FIDENPDLFEITESK.D	1852.92	1.41		2
			K.FIDENPDLFEITESK.D	1852.92	1.42		3
			K.FIDENPDLFEITESKDR.G	2124.05	1.49		3
			K.FMPDTGK.I	850.426	1.36		2
			K.GEEAITVRPGSLLPAEDFDEIAK.Y	2513.31	1.38		3
			K.GMIGQPEGGIPK.D	1238.67	1.39		2
			K.IIEYAPAFSLDDK.V	1536.81	1.25		2
			K.IIEYAPAFSLDDKVR.K	1792.98	1.53		3
			K.IMVKEEDEVK.A	1302.71	1.04		2
			K.IVEATMCYTGDILDK.T	1783.87	1.46		3
			K.IVEATMCYTGDILDKTK.T	2042.05	1.49		3
			K.LESDVFFYGLNK.N	1486.77	1.45		2
			K.LLLTDTTMR.D	1090.61	1.21		2
			K.MAQELESLGADIIAIK.D	1756.96	1.27		2
			K.MAQELESLGADIIAIK.D	1756.96	1.27		3
			K.NEECEVEIEEGK.V	1519.67	1.39		2
			K.NKLDKDNIIEEGK.N	1626.92	1.44		2
			K.NKLDKDNIIEEGK.N	1626.92	1.4		3
			K.NLSFPDSVVDYCK.G	1598.77	1.6		2
			K.NYPDNVIEEFTK.E	1523.75	1.38		2
			K.QLLMIMK.-	931.56	0.97		2
			K.SQDDVEIR.G	988.482	1.53		2
			K.SVGIYSK.E	808.47	1.34		2
			K.TKYNLEYYIK.M	1417.79	1.36		2
			K.TKYNLEYYIK.M	1417.79	1.38		3
			K.VDAIHPGYGFLAENAEFAR.K	2105.04	1.28		3
			K.VKEDDMVEDK.Q	1290.64	1		2
			K.VKEDDMVEDK.Q	1290.64	1.02		3
			K.VKEDDMVEDKQLLMIMK.-	2177.16	1.12		4
			K.VVGDLAIFMTK.N	1248.72	1.23		2
			K.YDINANIR.N	1005.52	1.29		2
			K.YKEANEVVGDIIK.V	1560.88	1.26		2
			K.YKEANEVVGDIIK.V	1560.88	1.28		3
			K.YNLEYYIK.M	1160.61	0.91		2
			R.DTGIDLFGYDELGK.Y	1597.79	1.34		2
			R.IVHREEDLELEYETACSESR.K	2493.15	1.99		3
			R.IVHREEDLELEYETACSESR.K	2493.15	2.07		4
			R.KCEENGITFIGPSSK.V	1749.9	1.69		3
			R.KKVDAIHPGYGFLAENAEFAR.K	2417.29	1.16		4
			R.LVEIGEVK.E	941.58	1.35		2
			R.NVISYALYPK.V	1222.7	1.38		2
			R.QGIDVFR.I	861.471	1.24		2
			R.TFQGAINK.T	933.528	1.16		2
			R.TGSGFGIR.L	821.44	1.34		2
			R.TIGFELNGMVR.E	1263.66	1.55		2
			K.ADM(15.995)NDPLQIGASIPGK.V	363.146	0		2
			K.ADM(15.995)NDPLQIGASIPGK.V	363.146	0		3
			K.CEENGITFIGPSSK.V	1593.77	0		2
			K.DLQEVVLK.G	998.601	0		2
			K.DLQEVVLKGEEAITVR.P	1855.05	0		3
			K.DLQEVVLKGEEAITVRPGSLLPAEDFDEIAK.Y	3466.87	0		4
			K.DM(15.995)SGLLKPYSAYTLVK.E	292.109	0		3
			K.DNIIEEGK.N	972.513	0		2
			K.FIDENPDLFEITESKDR.G	2124.05	0		2
			K.GM(15.995)IGQPEGGIPK.D	234.104	0		2
			K.GPIDAYLDM(15.995)DGIIDLAK.R	1021.48	0		2
			K.HLQHYNDISK.L	1309.68	0		2
			K.HLQHYNDISK.L	1309.68	0		3
			K.INNVEKADMNDPLQIGASIPGK.V	2408.28	0		3
			K.IVEATM(15.995)CYTGDILDK.T	690.362	0		2
			K.IVEATM(15.995)CYTGDILDK.T	690.362	0		3
			K.KLLLTDTTMR.D	1246.73	0		3
			K.KVDAIHPGYGFLAENAEFAR.K	2261.17	0		4
			K.LLQFIGDVIVNDNACK.E	1875	0		2
			K.LLQFIGDVIVNDNACK.E	1875	0		3
			K.M(15.995)AQELESLGADIIAIK.D	177.082	0		2
			K.M(15.995)AQELESLGADIIAIK.D	177.082	0		3
			K.NTERDTGIDLFGYDELGK.Y	2099.03	0		3
			K.NYPDNVIEEFTK.E	1523.75	0		3
			K.VDAIHPGYGFLAENAEFAR.K	2105.04	0		2
			K.VVGDLAIFM(15.995)TK.N	991.541	0		2
			K.VYEDYIK.H	984.517	0		2
			R.EEDLELEYETACSESR.K	1986.84	0		2
			R.EEDLELEYETACSESR.K	1986.84	0		3
			R.EVEIKDKNFSGK.I	1504.85	0		3
			R.IVHREEDLELEYETACSESR.K	2493.15	0		2
			R.KAFGEDIIFIEK.Y	1492.85	0		2
			R.KAFGEDIIFIEK.Y	1492.85	0		3
			R.KCEENGITFIGPSSK.V	1749.9	0		2
			R.KKVDAIHPGYGFLAENAEFAR.K	2417.29	0		3
			R.LDGGNGFTGANISPHYDSLLVK.T	2331.19	0		2
			R.LDGGNGFTGANISPHYDSLLVK.T	2331.19	0		3
			R.LVEIGEVKENGFR.T	1544.86	0		2
			R.LVEIGEVKENGFR.T	1544.86	0		3
			R.STEEAKEVANK.I	1288.69	0		2
			R.TKADESYLIGEGK.G	1493.8	0		2
			R.TKADESYLIGEGK.G	1493.8	0		3
WP_004454390.1	2-hydroxyacyl-CoA dehydratase	2-hydroxyacyl-CoA			1.35	8.33	234
			K.NKPFMSLETDYSK.S	1642.83	1.35		3
			K.SLGVTITEEDIR.T	1359.72	1.28		2
			K.VKPTYVMHLPNTSK.G	1697.95	1.5		4
			R.ILITGSPIGGISEK.I	1439.86	20		2
			R.KVIDDMKER.Y	1216.68	1.33		3
			K.MYEELAK.V	938.478	0		2
			K.NKPFMSLETDYSK.S	1642.83	0		2
			K.TLEDAGASVVAYELCGAIR.S	2023.01	0		2
			K.VKPTYVMHLPNTSK.G	1697.95	0		3
			K.YINIGCSCMMNNDNR.I	1888.77	0		2
			K.YINIGCSCMMNNDNR.I	1888.77	0		3
			R.ELLKEFYALGK.L	1393.82	0		3
			R.YEKGECPVQK.D	1320.67	0		3
WP_003421141.1	50S ribosomal protein L18	50S			1.4	0	2
			K.KVGELVAK.K	926.616	1.4		2
			R.SANNIYAQIIDDTK.R	1620.84	0		2
			R.SANNIYAQIIDDTKR.V	1776.94	0		3
WP_003421166.1	MULTISPECIES: 30S ribosomal protein S19	MULTISPECIES:			1.4	0	2
			K.LGEFVPTR.T	945.528	1.4		2
			R.SSTVFPQMVENTIAVHDGR.K	2116.05	0		3
WP_009888868.1	acetyl-CoA C-acetyltransferase	acetyl-CoA			1.42	0.13	2
			K.IMGYGPVPATK.K	1188.66	1.42		2
			K.SVSAVELGVTAAK.E	1286.74	1.51		2
			R.ILTTLLYEMK.R	1279.75	1.26		2
			K.AQAEGKFDEEIVPVVIK.G	1956.1	0		3
			K.VNVNGGAIAIGHPIGCSGAR.I	1948.01	0		3
			R.MGDAAFVDSMIK.D	1339.65	0		2
			R.TAVGSFGGAFK.S	1096.59	0		2
WP_009888329.1	amidohydrolase	amidohydrolase			1.45	0	2
			K.NNLEDLGLK.G	1070.6	1.45		2
			K.GGDIVNVVPADVHMESYVR.A	2085.04	0		3
WP_003421155.1	50S ribosomal protein L14	50S			1.46	0.21	2
			K.IVSLAPEVL.-	967.595	1.31		2
			R.YGNIGDVIVATVK.S	1403.8	1.61		2
			R.YGNIGDVIVATVK.S	1403.8	0		3
WP_003419082.1	50S ribosomal protein L21	50S			1.5	0	2
			K.VSEGDVLFVEK.L	1276.69	1.5		2
			K.LEANAGDVVTLNEVLACSK.D	2059.07	0		2
			K.LEANAGDVVTLNEVLACSK.D	2059.07	0		3
			K.LGSPVVEGASVQAK.V	1396.79	0		2
WP_003417105.1	ATP-dependent Clp protease ATP-binding subunit ClpX	ATP-dependent			1.51	0.52	2
			K.LIQAADFDIEK.A	1317.72	1.88		2
			R.DVSGEGVQQALLK.I	1398.77	1.14		2
			K.SNILLLGPTGSGK.T	1311.78	0		2
WP_003429271.1	PLP-dependent aminotransferase family protein	PLP-dependent			1.52	0.13	23
			K.MIYVIPDFQNPTGR.T	1677.85	1.74		2
			K.MIYVIPDFQNPTGR.T	1677.85	1.82		3
			K.QGADLQASTISQMEVSK.F	1847.93	1.5		2
			K.QGADLQASTISQMEVSK.F	1847.93	1.6		3
			K.TNVNKDDILVTSGSQQGLDFAGK.V	2491.3	1.5		3
			R.FEGETLPSLK.S	1175.64	1.52		2
			R.MQGLQGSEIR.E	1145.59	1.52		2
			R.SAMQYTTTEGYEPLR.E	1773.82	1.49		2
			K.FIDVPTDSDGM(15.995)IMEELEK.I	1223.54	0		2
			K.FIDVPTDSDGMIMEELEK.I	2125	0		2
			K.FIDVPTDSDGMIMEELEK.I	2125	0		3
			K.FMDMYDLDAHVDK.I	1654.74	0		3
			K.GLVIFLGTFSK.I	1236.75	0		2
			K.NVAYVAGGGFFPNGGR.E	1609.8	0		2
			R.SAMQYTTTEGYEPLREK.I	2060	0		2
			R.SAMQYTTTEGYEPLREK.I	2060	0		3
WP_003427723.1	50S ribosomal protein L24	50S			1.53	0.17	2
			K.KGDTVVVIAGK.D	1169.74	1.41		2
			K.VLVEGVNVITK.H	1225.76	1.65		2
			K.HQKPSAMNQQGGIINK.E	1833.99	0		3
WP_003421160.1	50S ribosomal protein L16	50S			1.57	0.21	23
			R.VMFELAGVSEDK.A	1379.7	1.43		2
			R.VMFELAGVSEDKAR.E	1606.84	1.72		3
			K.VTYGEFGLVALEASWITSNQIEAAR.I	2753.41	0		3
			R.VMFELAGVSEDKAR.E	1606.84	0		2
WP_003421163.1	30S ribosomal protein S3	30S			1.57	0.12	23
			K.EFGNLLLEDHNIR.K	1596.83	1.4		3
			K.RLYSAGVAK.I	1019.61	1.51		2
			R.ADIDYGFAEADTTYGK.I	1791.82	1.53		2
			R.ADIDYGFAEADTTYGK.I	1791.82	1.71		3
			R.AGAGIEALK.A	884.533	1.48		2
			R.LGGAEMAR.T	831.427	1.61		2
			R.STDKNAQLVAENIALAIER.R	2112.16	1.71		3
			R.TEGYSEGNVPLQTLR.A	1690.85	1.7		2
			K.EFGNLLLEDHNIR.K	1596.83	0		2
			K.MDLHVAKPGVVIGR.A	1546.9	0		3
			K.NAQLVAENIALAIER.R	1651.93	0		2
			K.VWICNGEVLPTR.D	1470.77	0		2
			R.AGAGIEALKAELEK.M	1482.87	0		3
WP_004454662.1	ABC transporter substrate-binding protein	ABC			1.57	0	2
			K.YYNVEEEVALR.T	1411.7	1.57		2
			K.AIEYIYTNPAEAAK.I	1608.84	0		2
			K.VNPEFPEGMSYEDWK.A	1883.85	0		2
WP_003421138.1	30S ribosomal protein S5	30S			1.58	0	2
			R.AVLELAGLK.D	968.627	1.58		2
			K.NLIVVPIVGTTIPHEVR.G	1885.12	0		3
			R.AVLELAGLKDVR.A	1338.82	0		3
WP_009892576.1	NAD(P)/FAD-dependent oxidoreductase	NAD(P)/FAD-dependent			1.58	0.21	2
			K.VVQTEDITVNYDK.L	1578.81	1.73		2
			R.GIIIDDMCQTTQK.D	1577.78	1.44		2
			-.MNYVVLGASAAGINAVK.T	1732.95	0		2
			K.DIYAAGDVVGK.N	1162.62	0		2
			K.LLIATGASSAIPPIK.N	1506.94	0		3
			K.QINFVDEDFMEQNNVK.W	2025.95	0		2
			K.VVQTEDITVNYDK.L	1578.81	0		3
			R.QLDEYTASVYENK.F	1614.78	0		2
WP_003421117.1	50S ribosomal protein L17	50S			1.59	0	2
			R.KGDAAEMAFIELV.-	1448.76	1.59		2
			R.NLVTCLLR.S	1015.58	0		2
WP_003421173.1	50S ribosomal protein L3	50S			1.59	6.16	234
			K.EFRVDSVEGYTVGQEIK.A	2012.03	1.62		3
			K.GFQGPIKR.H	957.576	0.91		2
			K.GVVIPVTAVEAGPMVVTQIK.T	2064.21	1.8		3
			K.TVDKDGYNAIQIGFEDAK.E	2068.06	1.82		3
			K.TVDKDGYNAIQIGFEDAKEK.A	2353.22	20		4
			K.VGMTQIFTDK.G	1194.63	1.59		2
			K.VTVQNLEVVK.V	1183.72	1.48		2
			R.RPGSMGACSYPGR.V	1422.65	1.48		3
			R.VDSVEGYTVGQEIK.A	1578.81	1.59		2
			K.ADVFEAGAK.I	962.507	0		2
			K.GVVIPVTAVEAGPM(15.995)VVTQIK.T	1366.75	0		3
			K.GVVIPVTAVEAGPMVVTQIK.T	2064.21	0		2
			K.TVDKDGYNAIQIGFEDAK.E	2068.06	0		2
			K.TVDKDGYNAIQIGFEDAKEK.A	2353.22	0		3
			R.VDSVEGYTVGQEIK.A	1578.81	0		3
WP_003421415.1	HU family DNA-binding protein	HU			1.59	0	2
			K.VQLVGFGTFETR.E	1380.74	1.59		2
			R.DPEQVIDIPASK.A	1366.73	0		2
WP_003429132.1	6-phosphofructokinase	6-phosphofructokinase			1.6	13.01	2
			K.TIGLLTSGGDAPGMNAAIR.A	1841.97	20		2
			R.AVELLLDGK.S	1012.62	1.6		2
WP_009897956.1	cell wall-binding protein Cwp2	cell			1.62	0.16	2
			K.GEADAMSIAAK.A	1118.56	1.72		2
			K.IYIVGGESAVSNTAK.K	1563.85	1.58		2
			K.YTGGSQVGQPIYEIK.V	1694.89	1.66		2
			R.YATAVAIAK.Q	962.58	1.35		2
			K.APIIVNGWNDLSADAIK.L	1853.01	0		2
			K.ATELTVESTNEK.D	1376.7	0		2
			K.IITNIDELEK.L	1242.71	0		2
			K.KAPILLASDNEIPK.V	1591.95	0		2
			K.LVDGLAATPLAQSK.K	1438.84	0		2
			K.LVDGLAATPLAQSK.K	1438.84	0		3
			K.LVNALGENK.E	1012.59	0		2
			K.NSDLNTVSPQDLYDGYR.L	1984.92	0		2
			K.VDLTANPVDSTGTNLDPSAEGFR.V	2404.16	0		2
			K.YENSADLSAEANSITEK.A	1896.9	0		2
			K.YTDNIVIVNSNK.L	1434.77	0		2
WP_009888533.1	formate--tetrahydrofolate ligase	formate--tetrahydrofolate			1.63	0	2
			K.ADLNNENLEALEK.G	1527.78	1.63		2
			K.KLGLGEDDVELYGK.Y	1618.88	0		3
			K.LILTTAINPTPAGEGK.T	1650.96	0		2
			K.TTTTIGVADAFAK.L	1350.74	0		2
WP_003422104.1	D-proline reductase (dithiol) proprotein PrdA	D-proline			1.64	4.57	23
			K.EANETQELVVDMK.L	1560.77	2.96		2
			K.IVLEENEQSLPMSK.K	1671.88	1.5		2
			K.IVLEENEQSLPMSK.K	1671.88	1.54		3
			K.LNNIEAIEK.V	1098.63	1.92		2
			K.NAIEGVEVK.A	1013.58	1.61		2
			K.QGIENEILSNNTLAPEDAVR.I	2211.12	1.59		2
			K.QGIENEILSNNTLAPEDAVR.I	2211.12	1.67		3
			K.SKQGIENEILSNNTLAPEDAVR.I	2454.28	1.63		3
			K.YMTHMVDNNK.S	1307.6	1.66		2
			K.YMTHMVDNNK.S	1307.6	1.66		3
			M.SITLETAQAHANDPAVCCCR.F	2302.03	20		3
			R.AFDYVTQEIR.E	1268.64	4.02		2
			R.GIPVVGVSFSAVQGALVVGNK.Y	2054.2	1.6		2
			R.GIPVVGVSFSAVQGALVVGNK.Y	2054.2	1.54		3
			R.HYWREPLVIR.A	1395.78	2.77		3
			R.KWNPNVK.L	968.581	1.53		2
			K.AGEAKEEVVEETVEEAAPVSEAAVVPVSTGVAGETVK.I	3752.94	0		3
			K.AGEAKEEVVEETVEEAAPVSEAAVVPVSTGVAGETVK.I	3752.94	0		4
			K.IVLEENEQSLPM(15.995)SK.K	1428.72	0		2
			K.IVLEENEQSLPM(15.995)SK.K	1428.72	0		3
			K.KVDNSLVVDEEVIEQYR.R	2091.09	0		3
			K.LKETLDALSPM(15.995)TTDNVEGYK.A	1272.7	0		3
			K.SKQGIENEILSNNTLAPEDAVR.I	2454.28	0		2
			K.YM(15.995)THMVDNNK.S	340.146	0		2
			K.YMTHM(15.995)VDNNK.S	709.293	0		2
			R.AM(15.995)EDEEIDLVGVVFVGSPQVNAEK.F	248.119	0		2
			R.AM(15.995)EDEEIDLVGVVFVGSPQVNAEK.F	248.119	0		3
			R.AMEDEEIDLVGVVFVGSPQVNAEK.F	2631.32	0		3
WP_003427733.1	DNA-directed RNA polymerase subunit alpha	DNA-directed			1.64	12.98	23
			R.GYGITIGNALR.R	1161.65	1.64		2
			R.GYVSAEENKTENVPIGVLPVDSIYTPVEK.V	3231.7	20		3
			K.DLAIATLDDNAK.L	1314.7	0		2
			K.SLEEVIQK.L	1000.58	0		2
			K.VDIVELSEDYR.Y	1364.68	0		2
			R.AGINTVEELANK.S	1313.72	0		2
			R.ILLSSLPGVAVNAIK.I	1549.98	0		2
WP_009897960.1	S-layer protein SlpA	S-layer			1.64	2.77	23
			K.AFVVGGTGLADAMSIAPVASQLR.N	2259.21	1.63		2
			K.AGETTYSTGLTFEDGSTEK.I	2049.95	1.63		2
			K.AGETTYSTGLTFEDGSTEK.I	2049.95	1.61		3
			K.ASIADENSPVK.L	1185.62	1.7		2
			K.AVEQLQK.G	870.518	1.84		2
			K.DLKDYVDDLR.T	1306.68	1.51		2
			K.DVENAIDDATGK.S	1302.63	1.31		2
			K.DYVDDLR.T	922.44	1.56		2
			K.EETIDIDASSSK.T	1349.66	20		2
			K.ESSYYQDNLNNDKK.V	1800.85	1.59		2
			K.ESSYYQDNLNNDKK.V	1800.85	1.75		3
			K.EVENELK.D	915.491	1.42		2
			K.EVENELKDMGLK.V	1487.79	1.74		2
			K.GIATSVINK.L	957.586	1.58		2
			K.GILDGSITEIK.V	1200.7	1.51		2
			K.IADEVGLDNDK.A	1243.63	1.46		2
			K.KAPLLLTSK.D	1053.72	1.95		2
			K.KVYLAGGVNSISK.E	1418.85	1.71		2
			K.KVYLAGGVNSISK.E	1418.85	1.63		3
			K.LAMSAIFDTAYTDSSETAVK.I	2177.06	1.92		2
			K.LAMSAIFDTAYTDSSETAVK.I	2177.06	1.85		3
			K.LGDSDIIDITK.A	1244.69	1.72		2
			K.LLFTQVDNK.L	1132.65	1.61		2
			K.LTVVPGSK.A	855.543	1.81		2
			K.LVSPAPIVLATDSLSSDQSVSISK.V	2470.36	2.05		3
			K.MDLADGDATPIVVVDGK.A	1770.91	1.71		2
			K.MDLADGDATPIVVVDGK.A	1770.91	1.53		3
			K.TDLNTLYK.V	1022.56	1.66		2
			K.TPSASVQPVITK.L	1282.75	1.84		2
			K.VETGDQGYTVVQSK.Y	1565.79	1.67		2
			K.VFFEGTLASTIK.V	1367.77	1.62		2
			K.VGSELNAADASK.L	1216.63	1.64		2
			K.VLDKDNGENLVQVGK.G	1710.95	1.88		3
			K.VLTGSDNDKNK.L	1273.69	1.38		3
			K.VVNFFVAK.D	978.59	1.6		2
			K.VYLAGGVNSISK.E	1262.72	1.38		2
			K.YQVVLYPEGK.R	1250.69	1.83		2
			K.YYNSDDENAIFR.D	1533.67	1.68		2
			R.DSVDNVVLVGGNAIVDGLVASPLASEK.K	2694.45	1.86		3
			R.IETAIALSQK.Y	1128.68	1.24		2
			R.IINAKEETIDIDASSSK.T	1918.03	1.64		2
			R.IINAKEETIDIDASSSK.T	1918.03	1.61		3
			R.LAGDDRYETSLK.I	1422.74	1.55		2
			R.LAGDDRYETSLK.I	1422.74	1.64		3
			K.AFVVGGTGLADAM(15.995)SIAPVASQLR.N	1235.62	0		2
			K.AFVVGGTGLADAM(15.995)SIAPVASQLR.N	1235.62	0		3
			K.APLLLTSK.D	897.59	0		2
			K.DLKDYVDDLR.T	1306.68	0		3
			K.DLTGASADAIIAGTSSADGVVTNTGAASGSTETNSAGTK.L	3582.72	0		3
			K.DLTGASADAIIAGTSSADGVVTNTGAASGSTETNSAGTK.L	3582.72	0		4
			K.DVENAIDDATGKSPDR.Y	1757.84	0		2
			K.DVENAIDDATGKSPDR.Y	1757.84	0		3
			K.ESSYYQDNLNNDK.K	1644.73	0		2
			K.LAM(15.995)SAIFDTAYTDSSETAVK.I	361.204	0		2
			K.LAM(15.995)SAIFDTAYTDSSETAVK.I	361.204	0		3
			K.LDNLGDGDYVDFLITSPGQGDK.I	2395.16	0		2
			K.LDNLGDGDYVDFLITSPGQGDK.I	2395.16	0		3
			K.LVSPAPIVLATDSLSSDQSVSISK.V	2470.36	0		2
			K.M(15.995)DLADGDATPIVVVDGK.A	177.082	0		2
			K.TAQDLAK.K	801.46	0		2
			K.TINDDVKDFLDDSQVDIIGGENSVSK.D	2907.44	0		3
			K.VETGDQGYTVVQSK.Y	1565.79	0		3
			K.VLDKDNGENLVQVGK.G	1710.95	0		2
			K.VLNGDEADTNGLIEEVSGK.Y	2016.01	0		2
			K.VLNGDEADTNGLIEEVSGK.Y	2016.01	0		3
			K.VLTGSDNDKNK.L	1273.69	0		2
			M.SAIFDTAYTDSSETAVK.I	1860.9	0		2
			R.DSVDNVVLVGGNAIVDGLVASPLASEK.K	2694.45	0		2
			R.TYNNGYSNAIEVAGEDR.I	1899.86	0		2
WP_003416451.1	RidA family protein	RidA			1.65	0	2
			K.AILAESGADFSNVVK.T	1575.85	1.65		2
			K.AILAESGADFSNVVK.T	1575.85	0		3
			K.DM(15.995)NEFGAINEVYAEYFGENKPAR.A	292.109	0		3
WP_003421188.1	50S ribosomal protein L1	50S			1.65	0	2
			K.EAEQAGADFVGAEELVQK.I	1946.97	1.65		2
			K.EAEQAGADFVGAEELVQK.I	1946.97	0		3
			R.SITVASSMGPGVK.I	1288.71	0		2
WP_003424537.1	30S ribosomal protein S2	30S			1.66	0.28	234
			K.DMPELPGAMFVVDPR.K	1700.83	1.72		2
			K.EVAETGKPILFVGTK.K	1671.98	2.34		3
			K.KQAQDAIKDEAER.C	1584.85	1.68		2
			K.KQAQDAIKDEAER.C	1584.85	1.63		3
			K.LITGAMATAVIEGR.Q	1429.8	1.75		2
			K.QAQDAIKDEAER.C	1428.72	1.65		2
			K.QAQDAIKDEAER.C	1428.72	1.62		3
			K.QLLEAGVHFGHQTR.R	1619.85	1.73		4
			R.CGMYFVNER.W	1202.52	2.08		2
			R.KENIAIQEAHR.L	1363.76	1.6		3
			R.QGAEEEVAEDQE.-	1360.56	1.19		2
			R.WLGGMLTNHK.T	1211.65	1.63		3
			K.EVAETGKPILFVGTK.K	1671.98	0		2
			K.LITGAM(15.995)ATAVIEGR.Q	632.357	0		2
			K.LITGAMATAVIEGR.Q	1429.8	0		3
			K.MEEEGVFNVLPK.K	1446.74	0		2
			K.QLLEAGVHFGHQTR.R	1619.85	0		2
			R.ELEKMEEEGVFNVLPK.K	1975.04	0		2
			R.ELEKMEEEGVFNVLPK.K	1975.04	0		3
			R.NGIYIIDLQK.T	1231.72	0		2
WP_003429729.1	50S ribosomal protein L35	50S			1.66	0	3
			K.STLVSDGDAKR.I	1203.65	1.66		3
			K.STLVSDGDAK.R	1047.54	0		2
WP_009887887.1	50S ribosomal protein L4	50S			1.67	0	23
			K.ALVVIADKNDNVIK.S	1594.97	1.67		3
			K.YDSFIITTDAVK.K	1427.75	1.67		2
WP_009887891.1	MULTISPECIES: 50S ribosomal protein L22	MULTISPECIES:			1.67	0.44	23
			K.LYIASIVANQGPTMK.R	1660.92	1.67		2
			K.LYIASIVANQGPTMK.R	1660.92	1.67		3
			R.GKNVDEALAILK.F	1353.82	2.43		3
			K.NVDEALAILK.F	1140.68	0		2
WP_009888509.1	phenylalanine--tRNA ligase subunit beta	phenylalanine--tRNA			1.67	0	2
			R.AAQLVEMLGAGK.V	1242.7	1.67		2
			K.DLDPNLAEIAANR.A	1438.74	0		2
			K.LVTLDDVER.T	1086.59	0		2
			K.YVGTLGELHPDVIENYNLGQR.V	2415.23	0		3
WP_003436178.1	elongation factor G	elongation			1.68	3.9	234
			K.GGVEPQSENVWR.Q	1384.67	1.68		2
			K.GILADGEEAER.H	1186.58	1.62		2
			K.GNAVLLEPYFK.V	1305.73	2.24		2
			K.IGETHEGASQMDWMEQEKER.G	2447.09	1.68		4
			K.IMTDPFVGK.L	1062.58	1.33		2
			K.KGNAVLLEPYFK.V	1461.86	20		2
			K.KGNAVLLEPYFK.V	1461.86	1.89		3
			K.TVGGSVPK.E	799.48	1.97		2
			K.VGAPQVAYR.E	987.55	1.58		2
			K.VYAGDIAAAVGLK.D	1302.75	1.65		2
			K.YLEGEELTIDELK.V	1606.83	1.9		2
			R.ATYTMIFDHYEQVPASVAK.K	2227.11	1.66		3
			R.ETITQPVDVEYK.Y	1476.77	1.89		2
			R.GITITSAATTASWK.D	1462.8	1.79		2
			R.HSSDEEPFSALAFK.I	1619.78	1.21		2
			R.ILFYTGQTHK.I	1262.7	1.55		3
			R.LNSNAVPMQLPIGK.E	1536.87	2.01		2
			R.QAETYGVPR.I	1047.53	1.46		2
			R.VAPQEPGEGYK.F	1229.63	1.72		2
			R.VLDGSVAVFCAK.G	1320.71	1.98		2
			R.VYSGTLESGSYVLNATK.N	1844.96	1.67		2
			R.VYSGTLESGSYVLNATK.N	1844.96	1.68		3
			K.ATIACEMNPVFCGTAYR.N	1988.9	0		2
			K.ATIACEMNPVFCGTAYR.N	1988.9	0		3
			K.EDSFIGIIDLLK.M	1417.81	0		2
			K.IGETHEGASQMDWMEQEK.E	2161.95	0		3
			K.IGETHEGASQMDWMEQEKER.G	2447.09	0		3
			K.LVESVAETDEELMMK.Y	1778.87	0		2
			K.VEVVTPEDYMGDVMGDLNSR.R	2254.03	0		2
			K.VEVVTPEDYMGDVMGDLNSR.R	2254.03	0		3
			K.YLEGEELTIDELK.V	1606.83	0		3
			R.ATYTM(15.995)IFDHYEQVPASVAK.K	613.278	0		3
			R.ATYTMIFDHYEQVPASVAK.K	2227.11	0		2
			R.EKLVESVAETDEELMMK.Y	2065.04	0		2
			R.EKLVESVAETDEELMMK.Y	2065.04	0		3
			R.GLIQGMEAR.S	1001.53	0		2
			R.ILQMHANTR.E	1110.6	0		2
			R.KATIACEMNPVFCGTAYR.N	2145.03	0		3
WP_003419338.1	30S ribosomal protein S16	30S			1.69	0	2
			K.WLATGAQPTEVVK.K	1454.81	1.69		2
			K.FIEEIGYYNPISEPK.Q	1854.95	0		2
			K.FIEEIGYYNPISEPK.Q	1854.95	0		3
WP_003439900.1	proline iminopeptidase-family hydrolase	proline			1.69	0.1	2
			K.ALLDAVNTGDYSSK.E	1508.77	1.62		2
			R.ISYMSEVDQK.A	1254.62	1.76		2
			K.SYILSSTLSSAK.L	1311.73	0		2
WP_003421175.1	30S ribosomal protein S10	30S			1.7	0.06	2
			K.AGSQVSGPVPLPTEK.Q	1521.84	1.75		2
			R.LIDIANPTPK.T	1136.68	1.66		2
WP_009889371.1	NADH peroxidase	NADH			1.7	0.2	23
			K.AFLGLLNR.H	930.565	1.77		2
			K.FAELLGEVVVADTK.E	1545.87	1.54		2
			R.EGYPEVAEAYK.R	1310.64	1.3		2
			R.IGVAQGVDAEIIEGLR.A	1666.93	1.31		2
			R.IGVAQGVDAEIIEGLR.A	1666.93	1.7		3
			R.VDAEYGATDGK.L	1180.56	1.71		2
			R.VRVDAEYGATDGK.L	1435.73	1.72		2
			R.VRVDAEYGATDGK.L	1435.73	1.81		3
			K.ELGLDAIHDTVHEM(15.995)CKDEAR.H	1606.77	0		3
			K.ELGLDAIHDTVHEM(15.995)CKDEAR.H	1606.77	0		4
			K.ELGLDAIHDTVHEMCKDEAR.H	2395.13	0		4
			K.ELGLDAIHDTVHEMCKDEAR.H	2395.13	0		5
			K.FAELLGEVVVADTK.E	1545.87	0		3
			K.FAELLGEVVVADTKENLR.V	2059.14	0		2
			K.FAELLGEVVVADTKENLR.V	2059.14	0		3
			K.FVCTVCGYIHEGDAAPAQCPVCK.V	2695.21	0		3
			K.GEMVWADEHR.I	1256.56	0		2
			K.VGADKFEEMK.G	1236.64	0		2
			K.VGADKFEEMKGEMVWADEHR.I	2448.16	0		3
			K.VGADKFEEMKGEMVWADEHR.I	2448.16	0		5
			R.ANFTGECTEVGMYLAMSR.Q	2064.91	0		2
			R.ANFTGECTEVGMYLAMSR.Q	2064.91	0		3
			R.EGYPEVAEAYKR.I	1466.74	0		2
			R.EGYPEVAEAYKR.I	1466.74	0		3
			R.IAFEEAEHAAK.F	1270.66	0		2
			R.IAFEEAEHAAK.F	1270.66	0		3
			R.QADREGYPEVAEAYK.R	1780.86	0		2
			R.QADREGYPEVAEAYK.R	1780.86	0		3
WP_011861888.1	D-proline reductase (dithiol) protein PrdB	D-proline			1.7	0.03	2
			R.DTLEQLVAIPSAGK.I	1496.85	1.72		2
			R.FNLAGDTTFR.A	1168.59	1.68		2
			R.DTLEQLVAIPSAGK.I	1496.85	0		3
			R.LHELAAEGFIK.G	1282.73	0		3
WP_003421962.1	type I glyceraldehyde-3-phosphate dehydrogenase	type			1.71	0.3	23
			K.AIGLVIPSLK.G	1065.72	1.77		2
			K.DKAEAHIQAGAK.K	1321.74	1.69		3
			K.KVVISAPATGDLK.T	1381.85	1.51		3
			K.NVTVEEINAAMK.E	1373.72	2.06		2
			K.VMEVDGK.Q	832.436	1.45		2
			K.VVISAPATGDLK.T	1225.73	1.59		2
			R.TLGYFAQLAK.-	1166.67	1.73		2
			R.VPVVTGSITELVCTLGK.N	1829.04	2.36		3
			K.GLMTTIHAYTNDQNTLDGPHPK.G	2480.22	0		3
			K.KVVISAPATGDLK.T	1381.85	0		2
			K.MLAHLFK.Y	914.541	0		2
			K.VLNDKYGIEK.G	1261.73	0		3
			K.VVSWYDNEMSYTSQLIR.T	2119.01	0		2
			R.AAAGNIVPNTTGAAK.A	1410.78	0		2
			R.VPVVTGSITELVCTLGK.N	1829.04	0		2
WP_003421148.1	30S ribosomal protein S8	30S			1.72	6.95	23
			K.HETVDVPASNMK.K	1382.69	1.72		2
			K.HETVDVPASNMK.K	1382.69	1.5		3
			R.GYDVIEDGK.Q	1050.52	1.36		2
			R.ILLEEGFIR.G	1116.65	1.36		2
			R.KENVGGEVICYVW.-	1607.8	2.02		2
			R.VYAANHEIPK.V	1196.66	1.84		2
			R.VYAANHEIPK.V	1196.66	20		3
			K.VLNGLGISVISTSK.G	1442.87	0		2
WP_003435963.1	molecular chaperone HtpG	molecular			1.72	0	2
			R.LVSLGEISENK.S	1243.7	1.72		2
			K.ELKPDELDSFVQR.S	1630.86	0		2
			K.GVIDCPDLPLNVSR.S	1581.82	0		2
			K.KVQIDTLSYTEGATPVR.W	1934.06	0		2
			K.LYNNQVFVADNIK.E	1592.86	0		2
			K.VIEPLNDTNPLWLK.S	1706.96	0		2
			K.YINQVAFSGAEDFFNK.Y	1905.93	0		2
			R.WISEGGTEYEISESDAR.N	1956.88	0		2
WP_009903252.1	DUF4091 domain-containing protein	DUF4091			1.72	10.65	2
			K.AFVNDAILR.D	1045.59	1.39		2
			K.AGDMFFVYPGK.D	1286.64	1.72		2
			K.NPSNLYEYNMVSVSK.G	1799.88	20		2
			K.SATHDQNFLDR.A	1330.63	0		3
			K.VATVIVSDYPWAGQSCYK.V	2100.04	0		3
			K.YSVVEAETWK.D	1266.65	0		2
			R.AKDEIDDMSINLK.L	1574.82	0		2
			R.AKDEIDDMSINLK.L	1574.82	0		3
			R.NVVLNPLDESK.F	1282.71	0		2
WP_009897922.1	phosphoenolpyruvate--protein phosphotransferase	phosphoenolpyruvate--protein			1.74	0.01	23
			K.AVLEGMDGKPIVIR.T	1552.9	1.73		3
			K.ISYLYNQFNPAVLR.L	1725.93	1.74		2
			R.TEFLYMDR.D	1101.52	1.75		2
			K.EMFVSMFESMDNEYMKER.A	2359.01	0		2
			K.EVLAELDSEGVAYAK.D	1648.86	0		2
			K.GKPSVTLDGK.H	1084.65	0		2
			K.ISYLYNQFNPAVLR.L	1725.93	0		3
			K.LENAVAVSKEELVK.V	1611.94	0		3
			K.MVLGFLTDIGGR.T	1305.71	0		2
			K.SIDNVEAEIAK.L	1243.67	0		2
			K.TESVNAEYALNEIK.E	1635.84	0		2
			R.AADIKDVTNR.I	1157.64	0		2
			R.DSFPTEEIQYEAYK.A	1774.83	0		2
WP_003419930.1	NADH peroxidase	NADH			1.76	5.51	234
			K.AFLGLLNR.Y	930.565	1.77		2
			K.FAELLGEVVVADTK.E	1545.87	1.54		2
			K.NWADEHR.I	954.431	1.96		2
			K.VGADKFEEMKGEK.N	1578.83	20		4
			R.IALEEAEHAAK.F	1236.67	1.57		2
			R.IALEEAEHAAK.F	1236.67	1.67		3
			R.IGVAQGVDEEIIEGLR.A	1724.93	1.76		2
			R.IGVAQGVDEEIIEGLR.A	1724.93	1.76		3
			R.VDAEYGATDGK.L	1180.56	1.71		2
			R.VRVDAEYGATDGK.L	1435.73	1.72		2
			R.VRVDAEYGATDGK.L	1435.73	1.81		3
			K.ELGLDAIHDTVHEM(15.995)CKDEAR.H	1606.77	0		3
			K.ELGLDAIHDTVHEM(15.995)CKDEAR.H	1606.77	0		4
			K.ELGLDAIHDTVHEMCKDEAR.H	2395.13	0		4
			K.ELGLDAIHDTVHEMCKDEAR.H	2395.13	0		5
			K.FAELLGEVVVADTK.E	1545.87	0		3
			K.FAELLGEVVVADTKENLR.V	2059.14	0		2
			K.FAELLGEVVVADTKENLR.V	2059.14	0		3
			K.FVCTVCGYIHEGDAAPAQCPVCK.V	2695.21	0		3
			K.VGADKFEEMK.G	1236.64	0		2
			K.VGADKFEEMKGEK.N	1578.83	0		2
			K.VGADKFEEMKGEK.N	1578.83	0		3
			R.EGYPEVGEAYK.R	1296.62	0		2
			R.QADREGYPEVGEAYKR.I	1923.95	0		3
			R.QADREGYPEVGEAYKR.I	1923.95	0		4
WP_003421180.1	30S ribosomal protein S7	30S			1.76	6.93	23
			K.AMDNIMPVLEVK.A	1414.76	1.88		2
			K.EIMDAANNTGASVK.K	1475.73	20		2
			K.LINNLMVDGK.K	1171.66	1.44		2
			K.TGEEALEVFNK.A	1291.67	1.58		2
			R.EVLPDPMYGSK.V	1290.65	1.83		2
			R.IVYDAFAIVAEK.T	1393.79	1.49		2
			R.VGGANYQVPIEVRPER.R	1810.97	1.76		3
			K.EIM(15.995)DAANNTGASVK.K	419.209	0		2
			R.RVGGANYQVPIEVRPER.R	1968.07	0		4
WP_003431452.1	UDP-glucose 4-epimerase GalE	UDP-glucose			1.76	0	2
			K.GYSVLDLVK.A	1048.62	1.76		2
WP_003435673.1	50S ribosomal protein L5	50S			1.77	0.28	23
			K.EQLIFPEIEYDKIDK.V	1964.06	1.94		3
			K.GVEELEMISGQKPVITK.A	1942.09	2.27		3
			K.IVINMGIGDAR.E	1185.65	1.74		2
			K.LLGMPFSK.-	947.551	1.81		2
			K.LVSVSLPR.V	897.565	1.47		2
			R.GMDIIFVTTAK.T	1250.69	1.58		2
			K.EVAPALMEK.F	1042.57	0		2
			K.GVEELEMISGQKPVITK.A	1942.09	0		2
			R.GNYALGVK.E	876.507	0		2
WP_003421122.1	30S ribosomal protein S11	30S			1.78	0	2
			K.STPFASQMAAETAAK.A	1565.78	1.78		2
			K.SVEVFVK.G	862.516	0		2
			R.ALQATGLEVTM(15.995)IK.D	1160.61	0		2
			R.ALQATGLEVTMIK.D	1429.82	0		2
WP_003421187.1	50S ribosomal protein L10	50S			1.78	0.1	23
			K.APVSNFAYLIDAIAK.K	1647.92	1.78		2
			K.GLTVEEVTELRK.Q	1428.82	1.8		3
			K.IVEMANIPSR.E	1156.63	1.79		2
			K.MGIVEGAFYDESK.I	1500.72	1.58		2
			K.SEVVSEIVEK.L	1173.65	1.65		2
			K.M(15.995)GIVEGAFYDESK.I	177.082	0		2
WP_003428573.1	electron transfer flavoprotein subunit alpha/FixB family pr	electron			1.78	0	2
			R.ATIDAGWLDK.A	1144.61	1.78		2
			K.AADPIVVLFGATSIGR.D	1613.91	0		2
			K.AADPIVVLFGATSIGR.D	1613.91	0		3
			K.VLPELISQLSVAK.E	1451.9	0		2
			R.ENVIQTVSLELLGK.A	1597.93	0		2
			R.IHTGLTADCTGLAVAEDTK.L	2029.02	0		3
WP_009901573.1	adenylate kinase	adenylate			1.8	0.19	2
			K.GTQAAGIVEK.Y	1028.59	1.93		2
			R.IILLGPPGAGK.G	1090.71	1.66		2
			K.IEGVCDVCQGELYQR.A	1852.84	0		2
			R.NVAQGEHLDIFLK.N	1538.85	0		3
WP_003419624.1	cold-shock protein	cold-shock			1.81	0.17	2
			K.GPQAANVVR.L	938.53	1.69		2
			K.TLEEGQSVEFEVVDGAK.G	1892.94	1.93		2
WP_009903195.1	glycine--tRNA ligase subunit beta	glycine--tRNA			1.81	10.53	23
			K.MLPNFIAVR.N	1087.62	1.81		2
			K.QVGKEEYIFATIK.Q	1608.91	20		3
			R.FVGSTLEQLK.N	1176.68	1.7		2
			K.LSADILDSLGLVDEK.A	1642.9	0		2
			K.VGGENDVVSEAIFEHYLPR.F	2159.07	0		3
WP_003434417.1	ribosome-associated translation inhibitor RaiA	ribosome-associated			1.82	0.06	2
			K.NIDSDEIAVVYK.R	1420.74	1.86		2
			K.QIELTDAIK.N	1085.63	1.77		2
			-.MNIIISGK.Q	930.557	0		2
			K.NIDSDEIAVVYKR.N	1576.85	0		3
WP_003421107.1	50S ribosomal protein L13	50S			1.84	0.06	23
			K.SYIAKPADVQR.K	1302.73	1.79		2
			K.SYIAKPADVQR.K	1302.73	1.88		3
			R.VFAGAEHTHAAQNPEVLNFK.-	2236.15	0		3
WP_003433890.1	ferritin	ferritin			1.85	0.09	23
			K.LAGEGGLFFVDQEFANR.T	1897.94	1.85		2
			K.LAGEGGLFFVDQEFANR.T	1897.94	1.85		3
			R.TYAAPTNPPVTI.-	1271.68	2.01		2
			K.VTALINNLAAVANSESDFR.T	2033.06	0		2
WP_003416023.1	phosphate propanoyltransferase	phosphate			1.86	0.13	2
			K.ESGDIAGTPGVK.L	1185.62	2		2
			K.LVGPAGEVEMK.E	1184.65	1.74		2
			R.ALVFENVLVR.A	1186.71	1.86		2
			-.MKLPIALSNK.H	1197.75	0		3
			K.APIKESGDIAGTPGVK.L	1622.92	0		3
WP_003421121.1	30S ribosomal protein S4	30S			1.87	10.51	2
			K.AGENLLSLLER.R	1241.7	1.74		2
			K.WLEANVEGMTAK.V	1403.71	1.87		2
			R.RLDNVVYR.M	1061.6	20		2
			K.VGDVIEVK.E	913.548	0		2
			R.AENMPGK.A	801.405	0		2
			R.NYAPGQHGQGR.K	1211.58	0		3
WP_003421135.1	50S ribosomal protein L15	50S			1.88	0	2
			R.VGFEGGQMPLAR.R	1288.66	1.88		2
			K.FTASAQEK.I	936.492	0		2
WP_003425341.1	glutamine-hydrolyzing GMP synthase	glutamine-hydrolyzing			1.88	0.18	2
			K.LKGVSEPEAK.R	1140.68	1.88		2
			R.AVTSSDGMTSDWYK.M	1602.72	1.85		2
			R.EIWQAFATLPDVK.T	1572.86	2.17		2
			K.ALCALSGGVDSSVAAVLIHK.A	2024.12	0		3
			K.VKGDWTTDSFIEDK.I	1723.87	0		2
			K.VKGDWTTDSFIEDK.I	1723.87	0		3
			R.EADAVYMDELRK.A	1494.74	0		2
			R.EIWQAFATLPDVK.T	1572.86	0		3
			R.EKFDINLIR.V	1202.7	0		3
			R.HPFPGPGLGIR.V	1174.66	0		2
WP_009903738.1	pyruvate kinase	pyruvate			1.88	0.3	2
			K.INLPAITPK.D	1021.65	1.97		2
			R.GDLGVEIPTEEMPIVQK.M	1911.01	1.88		2
			R.TGNFEDPEVFLEEGQK.F	1894.9	1.42		2
			K.GLAEDVK.S	786.449	0		2
			K.IENQEGVENLDEILK.V	1797.94	0		2
			K.SPIIATTNNEK.T	1242.68	0		2
			K.SSVAGNTDEVIEK.A	1403.71	0		2
			R.EVLENNNATDIQIISK.I	1855.99	0		2
			R.EVLENNNATDIQIISK.I	1855.99	0		3
			R.FNFSHGSHEEHKER.I	1795.84	0		4
			R.TGNFEDPEVFLEEGQK.F	1894.9	0		3
			R.VKEINGEDIVCVVENSGIVK.N	2285.24	0		3
WP_003417102.1	ATP-dependent Clp endopeptidase proteolytic subunit ClpP	ATP-dependent			1.89	0	3
			K.IKETLNEILSER.T	1499.86	1.89		3
			K.EYGLIDEVFTK.R	1368.72	0		2
WP_003418897.1	3-hydroxybutyryl-CoA dehydrogenase	3-hydroxybutyryl-CoA			1.89	0	2
			K.LVEVISGQLTSK.V	1328.79	1.89		2
			K.SINKVPVDVSESPGFVVNR.I	2099.15	0		3
WP_004454140.1	aspartate--tRNA ligase	aspartate--tRNA			1.9	0	3
			R.KQISSLEEHAK.T	1352.77	1.9		3
			K.FFNEEEMNAILTR.M	1640.79	0		2
			K.FGYLLEAFK.Y	1142.64	0		2
			K.FYALPQSPQLYK.Q	1509.82	0		2
			K.NPNMPTGDIEIFATELR.L	1945.96	0		2
			K.SETPPIYIKDDDDVSEALR.L	2219.1	0		3
			K.VFADATQPGK.S	1088.59	0		2
			K.VGQEGVTSPIAK.F	1240.7	0		2
			K.YGTPPHAGLAFGLDR.L	1598.82	0		2
			R.DTSGLCQIVFDTDVDKEAFEK.A	2501.21	0		3
			R.FCEIETPFLIAPTPEGAR.D	2076.04	0		2
WP_009889064.1	alanine--tRNA ligase	alanine--tRNA			1.9	12.8	23
			K.GGGRPNMAQAGASDVSK.V	1657.82	1.9		3
			K.VNNVILSSLDIK.C	1369.82	20		2
			K.AYPVLVEK.E	973.585	0		2
			K.LYDTYGFPIDLTK.E	1600.84	0		2
			K.NIDTGMGLER.M	1132.55	0		2
			K.SLLLINSGMAPLK.N	1411.85	0		2
			K.TVLSGQEAFK.L	1134.63	0		2
			K.VDQALSYASEVIK.T	1477.8	0		2
			R.AVTFLVSDGVLPSNEGR.G	1787.94	0		2
			R.EVLGEHVNQAGSLVTPER.L	1963.02	0		3
			R.TGDIENVGITAR.H	1272.67	0		2
WP_003434148.1	triose-phosphate isomerase	triose-phosphate			1.91	6.03	23
			K.ALENVLKDDLAK.V	1411.83	2.33		2
			K.ALENVLKDDLAK.V	1411.83	2.35		3
			K.EALEFVNEVK.D	1232.67	1.58		2
			K.EALEFVNEVKDK.V	1503.82	20		3
			K.EIDMDYVVIGHSER.R	1689.8	1.7		3
			K.GAFTGEVSPLMLK.E	1404.77	1.82		2
			K.GLYGELANEVR.I	1247.65	1.81		2
			K.TATAEDANDVISYIR.E	1665.82	1.91		3
			K.VVVAYEPIWAIGTGK.T	1657.94	1.99		2
			K.EIDMDYVVIGHSER.R	1689.8	0		2
			K.TATAEDANDVISYIR.E	1665.82	0		2
			K.VVVAYEPIWAIGTGK.T	1657.94	0		3
			R.QYFNETDETVNKK.V	1698.85	0		3
WP_009887863.1	elongation factor Tu	elongation			1.91	3.78	234
			K.FTAEVYVLK.K	1124.65	1.86		2
			K.LLDQAQAGDNIGALLR.G	1694.93	1.79		2
			K.LLDQAQAGDNIGALLR.G	1694.93	1.79		3
			K.TTLTAAITK.T	974.601	1.53		2
			K.VQDEVELVGLTEAPR.K	1681.89	2.02		2
			K.VQDEVELVGLTEAPR.K	1681.89	1.82		3
			R.DLLTEYDFPGDDTPIVR.G	1993.97	2.01		2
			R.EHILLSR.Q	894.529	2.02		2
			R.GITISTAHVEYETPNR.H	1814.92	1.96		2
			R.GITISTAHVEYETPNR.H	1814.92	1.83		3
			R.GSALMALEDPK.S	1186.63	1.96		2
			R.GSALMALEDPKSEWGDK.I	1917.96	2.04		3
			R.HYAHVDCPGHADYVK.N	1824.84	2.74		4
			R.KLLDQAQAGDNIGALLR.G	1852.06	2.01		2
			R.KLLDQAQAGDNIGALLR.G	1852.06	1.83		3
			R.KVVVTGVEMFR.K	1319.76	1.71		2
			R.KVVVTGVEMFR.K	1319.76	1.8		3
			R.QVGVPYIVVFLNK.C	1530.92	1.84		2
			R.TTDVTGACK.L	1007.5	1.91		2
			R.TVASGVVATIIE.-	1186.68	1.91		2
			R.YQLGEAVDFANIDK.A	1637.83	1.33		2
			R.YQLGEAVDFANIDK.A	1637.83	20		3
			R.YQLGEAVDFANIDKAPEER.E	2221.11	2.03		3
			E.M(15.995)EVRDLLTEYDFPGDDTPIVR.G	177.082	0		2
			K.NMITGAAQM(15.995)DGAILVCSATDGPMPQTR.E	963.452	0		3
			K.NMITGAAQMDGAILVCSATDGPMPQTR.E	2834.33	0		3
			R.DLLTEYDFPGDDTPIVR.G	1993.97	0		3
			R.GSALM(15.995)ALEDPK.S	505.257	0		2
			R.GSALMALEDPKSEWGDK.I	1917.96	0		2
			R.HYAHVDCPGHADYVK.N	1824.84	0		3
			R.YQLGEAVDFANIDKAPEER.E	2221.11	0		2
WP_003419491.1	30S ribosomal protein S15	30S			1.92	0	2
			R.AEGDTGSPEVQIALLTAR.I	1854.97	1.92		2
WP_003425850.1	F0F1 ATP synthase subunit beta	F0F1			1.92	0.42	2
			K.IGLFGGAGVGK.T	1030.62	1.86		2
			K.TALVFGQMNEPPGAR.M	1614.82	2.61		2
			K.TVLIQELINNIAK.Q	1523.93	1.92		2
			K.FDSEQSLPNLLNALVIK.L	1957.1	0		2
			K.VVDLLAPYLK.G	1185.74	0		2
			R.EGNDLYGEMSESGVINK.T	1896.88	0		2
			R.EGNDLYGEMSESGVINK.T	1896.88	0		3
			R.FTQAGSEVSALLGR.M	1462.78	0		2
			R.GMEVVDTGGPISVPVGDETLGR.I	2213.11	0		2
			R.ILDPSIVGK.E	996.622	0		2
			R.QISSLGIYPAVDPLESTSR.I	2061.08	0		2
			R.QISSLGIYPAVDPLESTSR.I	2061.08	0		3
WP_009897431.1	aminopeptidase P family protein	aminopeptidase			1.93	0	2
			R.GYNLDILSR.S	1077.58	1.93		2
			K.MGQEGCPTTDEYLYK.N	1846.81	0		2
			K.NEVELENIR.N	1142.59	0		2
			R.EQEGFFEPSFNTIAAYK.E	2033.98	0		2
			R.YFIQAESQLEGSTIK.L	1768.92	0		2
WP_009898301.1	phosphopyruvate hydratase	phosphopyruvate			1.93	0.18	23
			K.GLACGVGDEGGFAPNLGSNR.E	1975.93	2.27		2
			K.GLACGVGDEGGFAPNLGSNR.E	1975.93	2.09		3
			K.KYVLAGEGK.E	1047.63	1.87		2
			K.LQLVGDDLFVTNTER.L	1746.92	1.9		2
			K.LQLVGDDLFVTNTER.L	1746.92	1.5		3
			K.RAGYTAVISHR.S	1257.69	1.94		2
			K.RAGYTAVISHR.S	1257.69	1.82		3
			K.VNQIGTITETLDAIEMAK.R	2003.07	2.17		2
			K.VNQIGTITETLDAIEMAK.R	2003.07	2		3
			K.YVLAGEGK.E	891.507	2.03		2
			R.AAADEIGLPLFQYLGGVNAK.Q	2103.14	1.94		2
			R.AAADEIGLPLFQYLGGVNAK.Q	2103.14	1.92		3
			R.AGYTAVISHR.S	1101.59	1.82		2
			R.AIVPSGASTGAFEAVELR.D	1801.96	2.04		2
			R.AIVPSGASTGAFEAVELR.D	1801.96	2.09		3
			R.EALELIVEAITK.A	1383.82	1.77		2
			R.IEEMVGEQAR.Y	1188.58	1.71		2
			R.MGAEVFHSLKK.V	1329.75	1.91		3
			-.MSVIELVYAR.E	1207.66	0		2
			K.GIENGVANSILVK.V	1368.8	0		2
			K.VNQIGTITETLDAIEM(15.995)AK.R	1774.9	0		3
			R.MGAEVFHSLK.K	1173.62	0		2
			R.SGETEDSTIADLAVAVNAGQIK.T	2245.15	0		2
WP_003436882.1	aminoacyl-histidine dipeptidase	aminoacyl-histidine			1.94	0.24	23
			K.ESTIEFLTSVR.S	1308.69	2.06		2
			K.GISDFLLSFGK.N	1238.69	1.88		2
			K.HEFTTSDPGMTYSVAETSVDK.V	2358.08	2.06		3
			K.QINDILTAFK.H	1217.7	2.05		2
			K.TCVVSLPVEYK.E	1349.73	1.92		2
			R.VLSVLNVDYELASVDGGTK.H	2035.09	1.94		2
			R.VLSVLNVDYELASVDGGTK.H	2035.09	1.39		3
			K.GYENCPGVVLQGHMDMVCEK.E	2379.06	0		3
			K.HEFTTSDPGMTYSVAETSVDK.V	2358.08	0		2
			K.NVEHDFLKDPIK.L	1537.85	0		3
WP_003434815.1	bifunctional acetaldehyde-CoA/alcohol dehydrogenase	bifunctional			1.95	0.54	23
			K.LAPSLTLGCGSWGGNSVSENVGVK.H	2445.24	2.77		3
			K.LSPVLAMYK.S	1076.63	1.75		2
			R.ENMLWFR.A	1022.5	1.95		2
			K.LAPSLTLGCGSWGGNSVSENVGVK.H	2445.24	0		2
			R.IAEPVGVLSAVIPTTNPTSTAIFK.S	2482.41	0		3
			R.NGIIFSPHPR.A	1164.64	0		2
WP_009898069.1	bifunctional acetaldehyde-CoA/alcohol dehydrogenase	bifunctional			1.95	3.01	234
			K.ANFVAIPTSAGTGSEVTPFAVITDQDTGVK.Y	3049.57	2.34		3
			K.AVTDLLDEMNIK.H	1416.75	1.94		2
			K.DMYLNSYYGR.-	1308.58	2.11		2
			K.EFGVEESK.F	979.486	1.75		2
			K.EQVIIENKK.E	1183.72	20		3
			K.ETGMGIAEDK.V	1105.53	1.83		2
			K.EVDLTLATGGPGMVK.S	1542.83	1.86		2
			K.EVDLTLATGGPGMVK.S	1542.83	1.95		3
			K.FNSSDAPK.K	920.46	2.22		2
			K.FQSLLVAIEDLK.L	1430.84	1.63		2
			K.HTTFFEVEPDPTLECAK.I	2076.99	2.5		3
			K.IAEPIGVIAAVVPTTNPTSTAIFK.A	2466.42	2.2		2
			K.IAEPIGVIAAVVPTTNPTSTAIFK.A	2466.42	1.94		3
			K.IFATYSQEQVDK.I	1483.76	1.72		2
			K.IFLAASLAANK.Q	1173.71	1.47		2
			K.IVGQTACTIAK.L	1216.68	1.85		2
			K.LAGFEVPVDTK.V	1230.69	1.78		2
			K.LAPSLTLGCGSWGGNSVSENVGVK.H	2445.24	2.77		3
			K.LSPVLAMYK.A	1076.63	1.75		2
			K.LVEDGGFGHTSSLYIDDVNQR.E	2350.13	1.96		2
			K.LVEDGGFGHTSSLYIDDVNQR.E	2350.13	1.83		3
			K.NHYASEYIYNAYK.E	1690.8	2.99		2
			K.SAYSSGKPAIGVGAGNTPAIIDDSADIK.T	2759.44	2.32		3
			K.SIFEYLPR.A	1051.57	2.16		2
			K.TAVNSILVSK.T	1086.66	2.08		2
			K.TCGVIEKDEAFGMTK.I	1768.87	2.05		2
			K.TCGVIEKDEAFGMTK.I	1768.87	1.95		3
			K.VLIGEVESVEIEEAFAHEK.L	2184.14	1.8		3
			M.AHKEQVIIENK.K	1391.81	2.26		2
			M.AHKEQVIIENK.K	1391.81	2.3		3
			R.ENMLWFR.A	1022.5	1.95		2
			R.GAYLLDKDETEKIR.N	1733.96	3.15		3
			R.GAYLLDKDETEKIR.N	1733.96	2.88		4
			R.ILINTPSSQGGIGDLYNFK.L	2093.12	1.83		2
			R.ILINTPSSQGGIGDLYNFK.L	2093.12	1.77		3
			R.YAEIASFLGLK.G	1266.72	1.82		2
			K.AVTDLLDEM(15.995)NIK.H	1033.5	0		2
			K.ELKDVMNK.K	1059.6	0		2
			K.ETGM(15.995)GIAEDK.V	464.194	0		2
			K.EVDLTLATGGPGM(15.995)VK.S	1287.64	0		2
			K.EVDLTLATGGPGM(15.995)VK.S	1287.64	0		3
			K.FM(15.995)DSIDEM(15.995)VIQAFDDQCTGANPR.Y	324.151	0		3
			K.HTTFFEVEPDPTLECAK.I	2076.99	0		2
			K.LAPSLTLGCGSWGGNSVSENVGVK.H	2445.24	0		2
			K.NHYASEYIYNAYK.E	1690.8	0		3
			K.SIFEYLPRAYDNGAK.D	1799.93	0		2
			K.VLIGEVESVEIEEAFAHEK.L	2184.14	0		2
			R.AFIVTDTFLYNNGYTK.A	1922.99	0		2
			R.AFIVTDTFLYNNGYTK.A	1922.99	0		3
			R.EFNPDVIISIGGGSAM(15.995)DAGK.I	1633.8	0		2
			R.EFNPDVIISIGGGSAMDAGK.I	2034.02	0		2
			R.EFNPDVIISIGGGSAMDAGK.I	2034.02	0		3
			R.GAYLLDKDETEK.I	1464.77	0		3
			R.NGIIFSPHPR.A	1164.64	0		2
			R.NIILVNGGLNSK.I	1296.78	0		2
WP_009902000.1	threonine--tRNA ligase	threonine--tRNA			1.96	9.04	23
			K.LDEFIASISK.E	1177.66	2.04		2
			R.LVPEDLEKIEAEMK.K	1726.94	20		3
			R.NEALELMR.E	1002.52	1.83		2
			R.VAFGSIER.F	905.497	1.88		2
			K.DGSIKEFENAISVMDVAK.S	2037.05	0		3
			K.EVADNNVSVR.S	1129.57	0		2
			R.EALEELGLPYTINEGDGAFYGPK.I	2539.26	0		2
			R.LVPEDLEK.I	997.57	0		2
			R.QFDNTYIGQDGEK.H	1569.73	0		2
WP_009896496.1	sulfide/dihydroorotate dehydrogenase-like FAD/NAD-binding protein	sulfide/dihydroorotate			1.98	0	2
			K.SSQPGQFIIIK.N	1272.74	1.98		2
			K.ELIILEDDMK.K	1273.68	0		2
			K.FACVDGPEFDGHLVDFDQAMR.R	2454.08	0		3
			K.ILFVAGGVGSAPVYPQVK.W	1858.08	0		2
			K.ILFVAGGVGSAPVYPQVK.W	1858.08	0		3
			K.NVYVSTDDGTYGFNGR.V	1791.81	0		2
			R.IPLTIADYDREK.G	1488.82	0		3
WP_009897314.1	peptide-methionine (S)-S-oxide reductase MsrA	peptide-methionine			1.98	0	2
			K.IVTDIIPATK.F	1125.7	1.98		2
			K.TAIFYHDEEQKNIALESR.E	2220.13	0		4
			R.ENMEALGYGEYLK.L	1571.75	0		2
WP_003418660.1	cold-shock protein	cold-shock			1.99	0	2
			R.GPQAENVNRI.-	1124.59	1.99		2
			K.TLEEGEKVSFDITQGNR.G	1979	0		3
WP_003438306.1	translation initiation factor IF-2	translation			2.01	0	2
			K.LSNEEVQVK.V	1100.61	2.01		2
			K.ADVQGSVQAVK.Q	1156.65	0		2
			K.ISGVGTVAGCYVTNGK.I	1637.84	0		2
			R.KTDVISGEAGGITQHIGASEVK.I	2281.24	0		3
WP_009904144.1	rod shape-determining protein	rod			2.01	0.08	2
			K.VLMMNTK.N	891.492	2.07		2
			R.IGGDEFDESIVAYVK.K	1696.86	1.96		2
			K.DAFLIEEPMAAAIGAGLK.V	1873.01	0		2
			K.DAFLIEEPMAAAIGAGLK.V	1873.01	0		3
			K.DMGIDLGTANTLVYIK.G	1778.95	0		2
			K.EVLAVGEEAK.K	1099.61	0		2
			K.EVLAVGEEAKK.M	1255.74	0		2
			K.EVLAVGEEAKK.M	1255.74	0		3
			K.SVEDQEIFEK.V	1278.63	0		2
			R.DLISGLPK.T	897.553	0		2
			R.EPSVVAIRDDSK.E	1370.74	0		3
			R.IAICVPFGVTEVEKR.A	1772.99	0		3
			R.TPGNIVAIRPMK.D	1351.8	0		3
WP_003423115.1	fructose-6-phosphate aldolase	fructose-6-phosphate			2.02	0	2
			R.AGATYVSPFVGR.L	1251.66	2.02		2
			K.EGRDFIEVVK.E	1246.69	0		3
WP_003424103.1	coenzyme F420-0:L-glutamate ligase	coenzyme			2.02	0.16	23
			K.GLEGTPNEVK.L	1098.59	1.91		2
			R.AQGNYAHVDNIAK.D	1455.75	2.13		3
			K.HTFTGVDYVDYYK.N	1662.79	0		2
			K.IWELADPVVSPAYTK.G	1744.95	0		2
			K.TILNYTTSILTCDIHTR.Q	2050.06	0		3
WP_003424535.1	elongation factor Ts	elongation			2.03	0.17	23
			K.ALQEAEGNMEK.A	1274.62	2.03		2
			K.DVAMQVAAMNPK.Y	1329.68	2.24		2
			K.EGITLQEVLNNR.V	1412.76	2.06		2
			K.KALQEAEGNMEK.A	1430.74	2.16		2
			K.KALQEAEGNMEK.A	1430.74	1.98		3
			R.EENFAEEVAK.Q	1220.59	1.98		2
			R.FEVGEGIQK.R	1061.58	1.7		2
			-.MANITAQMVK.E	1161.62	0		2
			K.DVAMQVAAMNPK.Y	1329.68	0		3
			K.IGVLVEMETEAR.D	1373.72	0		2
			K.VVTNGQVAGYIHGGGK.I	1611.87	0		3
			R.ESTGAGMMDCK.K	1241.51	0		2
			R.ESTGAGMMDCKK.A	1397.64	0		3
WP_004454939.1	isoleucine--tRNA ligase	isoleucine--tRNA			2.04	0	2
			K.QQIEEYGIAEFNQK.C	1751.87	2.04		2
			K.AVDHFNEYIK.S	1290.66	0		3
			K.DLVLIGITAK.E	1097.71	0		2
			K.EAGPLLGSK.M	926.544	0		2
			K.LNAHETANKLEK.G	1450.81	0		3
			K.SLEEQNLNDHMTGIK.V	1783.88	0		3
			K.VLGEDYEVLEEMK.G	1608.8	0		2
			R.AIAPFAPYMSEEMYR.N	1803.84	0		2
			R.FWATELTEDKK.A	1450.77	0		3
			R.GNTVNPMELFDQYGADALR.W	2139.01	0		2
			R.YDLPVIQPVDETGK.F	1628.87	0		2
WP_003438268.1	GTP-sensing pleiotropic transcriptional regulator CodY	GTP-sensing			2.06	0	2
			K.YTTVVPILGSGQR.L	1417.79	2.06		2
			K.FSDEYTQNVLK.I	1398.7	0		2
			K.VLGLHLNDVQDSSVIEDEYTK.Q	2430.24	0		3
			R.AIGEELEEEMR.K	1332.62	0		2
WP_009896192.1	cysteine desulfurase NifS	cysteine			2.06	0.75	23
			K.LIDGVLER.I	941.555	1.89		2
			R.AGTENIPAIVGYGK.A	1444.79	2.1		2
			R.LHNFVHGGAQEK.S	1391.73	3.49		3
			R.LYMDYSATTPIKK.E	1613.87	2.02		3
			K.ELGIDLMSMSSHK.I	1502.75	0		3
			K.ENMQNHVETLTR.L	1498.72	0		2
			K.ENMQNHVETLTR.L	1498.72	0		3
			K.ILFHTDAVQATGNIPVDVK.E	2094.16	0		3
			R.SMSPLYDDAK.K	1181.56	0		2
WP_003438808.1	4-hydroxy-tetrahydrodipicolinate reductase	4-hydroxy-tetrahydrodipicolinate			2.07	0	2
			R.GIFASGSIAAAK.Y	1147.66	2.07		2
			R.GLDSYEGDLK.I	1151.57	0		2
WP_003429565.1	phosphoglycerate kinase	phosphoglycerate			2.08	9.34	23
			K.AQGYEVGTSLLEIDKVEYAK.E	2297.22	2		3
			K.ELPGIAALDNK.-	1195.68	1.81		2
			K.EVVFAADDNVVGENAK.K	1731.87	1.66		2
			K.GEAKPELSLAPVAK.R	1492.89	2.17		3
			K.MENGDVVLLENTR.Y	1516.76	20		2
			R.AHCSTVGAGEFLQER.V	1688.79	20		3
			K.AQGYEVGTSLLEIDKVEYAK.E	2297.22	0		2
			K.TIANFVK.T	847.517	0		2
			K.TIEDIDVCGK.K	1204.6	0		2
			K.VDNLIIGGGMAYTFLK.A	1767.97	0		2
WP_003422063.1	4-hydroxy-tetrahydrodipicolinate synthase	4-hydroxy-tetrahydrodipicolinate			2.09	0.01	2
			K.ELVNFGLK.V	974.58	2.08		2
			K.FFEGDIEGSR.K	1183.55	2.1		2
WP_009901787.1	putative manganese-dependent inorganic diphosphatase	putative			2.09	6.85	23
			K.EGSYLIYK.A	1027.56	2.34		2
			K.LGGISTDVPMSFR.V	1406.72	20		2
			K.LLILTNHTEISK.D	1436.86	1.4		3
			K.QLVPNLTTAIK.N	1252.78	2.09		2
			K.VDAPEILDNVR.I	1267.68	1.72		2
			K.YALDYFK.V	974.511	2.12		2
			K.YAMDMFK.C	960.445	1.72		2
			K.AEDSLIANAFGVEGVQGTFAPGVVSR.K	2619.34	0		2
			K.AEDSLIANAFGVEGVQGTFAPGVVSR.K	2619.34	0		3
			K.ATAYALGDIR.K	1077.58	0		2
			K.INGVSVVSVESDNYK.T	1664.86	0		2
			K.TLPVTYDDGTFAGIITMK.E	1999.04	0		2
			K.VVPLTPTSSILEAYNLMDEK.N	2276.21	0		2
			R.VMPVGCNSTIIYQMYK.E	1959.97	0		2
			R.YDSIEYAIDTK.V	1372.68	0		2
WP_003430074.1	TerD family protein	TerD			2.1	0	2
			K.TTLIVGAIYR.K	1133.68	2.1		2
			K.DLIYFGNLK.S	1137.64	0		2
WP_003438030.1	nitroreductase family protein	nitroreductase			2.11	0.12	23
			K.IVGYCNI.-	865.437	2.08		2
			K.LVPEIDVDVR.I	1181.67	2.14		2
			K.SDMQVVTDK.G	1077.54	1.88		2
			R.ALLDAFHYAR.L	1203.64	2.2		2
			R.ALLDAFHYAR.L	1203.64	2.11		3
			K.GNMIDSPSYIIILSDIK.D	1935.05	0		2
			K.KLVPEIDVDVR.I	1337.79	0		3
			K.LGINSDKEVTGIIAIGYGENVSNAK.V	2646.43	0		3
			K.VTELGIGSCWVTFEDGKK.V	2110.09	0		2
			K.VTELGIGSCWVTFEDGKK.V	2110.09	0		3
			R.KDGHTNLYEEK.I	1416.72	0		3
			R.SEVFNNLDK.V	1120.58	0		2
WP_009897862.1	pyruvate:ferredoxin (flavodoxin) oxidoreductase	pyruvate:ferredoxin			2.12	5.2	234
			K.ATPAAAMAK.F	886.495	2.17		2
			K.AVFTEWLDSR.N	1250.63	2.01		2
			K.DFILAQVR.Y	988.571	1.99		2
			K.ENAPMIIGGR.Y	1084.57	2.28		2
			K.FWGLGSDGTVGANK.Q	1463.74	1.82		2
			K.FYTVNAVK.L	996.564	2.61		2
			K.GDVMPANTVK.G	1086.57	2.02		2
			K.HSLFDYYGAEDAK.Y	1570.73	1.98		2
			K.HSLFDYYGAEDAK.Y	1570.73	1.99		3
			K.IIGDHTEK.Y	967.534	1.98		2
			K.IVDAMTELVSMDICEDAK.A	2095.99	2.09		3
			K.IVNMNYAAVDAGINALVK.V	1932.06	1.91		2
			K.IVNMNYAAVDAGINALVK.V	1932.06	1.82		3
			K.KSGGITMSHLR.F	1241.69	2.24		2
			K.KSGGITMSHLR.F	1241.69	1.98		3
			K.LAEIIPEEDAVK.Y	1381.77	2.15		2
			K.LGQEIGLGNR.I	1083.6	2		2
			K.MSNLTGR.K	805.412	2.5		2
			K.NPFTLDSKEPTASFK.D	1764.93	2.05		2
			K.NPFTLDSKEPTASFK.D	1764.93	2.29		3
			K.SGGITMSHLR.F	1085.57	2.25		2
			K.TVFDNLVSEQPK.N	1431.76	2.02		2
			K.VAGELLPGVFHVSAR.A	1578.89	20		2
			K.VAGELLPGVFHVSAR.A	1578.89	2.1		3
			K.VEVPASWENAVDADKGEVK.E	2127.09	2.15		3
			K.VEVPASWENAVDADKGEVKEPEFIK.N	2898.51	2.23		4
			K.VVELLEKPACDCTDEK.A	1989.98	20		2
			K.VVTQLYGDR.M	1077.58	1.94		2
			K.YAQAYFDYDSK.K	1425.65	1.84		2
			K.YAQAYFDYDSKK.S	1581.77	2.01		2
			K.YAQAYFDYDSKK.S	1581.77	1.97		3
			K.YYQNIVGIVEK.Y	1380.77	1.99		2
			R.ALASQALSIFGDHQDVMAAR.Q	2129.08	2.16		3
			R.ATYLIDEADYIACHK.Q	1838.9	2.3		3
			R.DNALSPNHPVAR.G	1317.68	2.44		2
			R.DNALSPNHPVAR.G	1317.68	2.63		3
			R.GTAQNPDIYFQTR.E	1537.75	2.03		2
			R.INMIMQSAFFK.L	1384.72	1.81		2
			R.KHSLFDYYGAEDAK.Y	1726.86	20		2
			R.KHSLFDYYGAEDAK.Y	1726.86	2.8		3
			R.MMIANATGCSSIWGASAPSIPYTCNHEGK.G	3167.44	20		3
			R.TKEPGSTGEPLYLDVR.D	1816.96	2.21		2
			R.TKEPGSTGEPLYLDVR.D	1816.96	2.14		3
			R.TVANEAQAVACGYWHLYR.F	2137.02	2.79		3
			K.HFLDAMPSTVER.I	1429.7	0		2
			K.HFLDAMPSTVER.I	1429.7	0		3
			K.IVDAMTELVSM(15.995)DICEDAK.A	1235.61	0		3
			K.IVDAMTELVSMDICEDAK.A	2095.99	0		2
			K.IVNM(15.995)NYAAVDAGINALVK.V	503.278	0		3
			K.LAEIIPEEDAVK.Y	1381.77	0		3
			K.NGFTVGIVDDVTNTSLTPSEPIK.I	2460.28	0		2
			K.NGFTVGIVDDVTNTSLTPSEPIK.I	2460.28	0		3
			K.NPFTLDSK.E	976.523	0		2
			K.QFPEEADGLFAK.A	1406.71	0		2
			K.QSYVYQYDLLK.G	1474.77	0		2
			K.TVFDNLVSEQPK.N	1431.76	0		3
			K.VVELLEKPACDCTDEK.A	1989.98	0		3
			R.ALASQALSIFGDHQDVM(15.995)AAR.Q	1829.9	0		2
			R.ALASQALSIFGDHQDVM(15.995)AAR.Q	1829.9	0		3
			R.ALASQALSIFGDHQDVMAAR.Q	2129.08	0		2
			R.ATYLIDEADYIACHK.Q	1838.9	0		2
			R.CKFWGLGSDGTVGANK.Q	1779.9	0		2
			R.CKFWGLGSDGTVGANK.Q	1779.9	0		3
			R.DVFYGKENAPMIIGGR.Y	1822.95	0		3
			R.INMIM(15.995)QSAFFK.L	648.334	0		2
			R.KHSLFDYYGAEDAK.Y	1726.86	0		4
			R.MQLSPLDCTGCGNCADICPAK.E	2424.04	0		2
			R.MQLSPLDCTGCGNCADICPAK.E	2424.04	0		3
			R.QPLM(15.995)EFSGACAGCGETAYIK.V	515.278	0		2
			R.QPLMEFSGACAGCGETAYIK.V	2246.03	0		2
			R.TVANEAQAVACGYWHLYR.F	2137.02	0		2
WP_003418888.1	acyl-CoA dehydrogenase	acyl-CoA			2.13	0.06	2
			K.GISAFIVEK.G	1018.61	2.09		2
			K.GTPGFSFGVK.E	1051.57	2.22		2
			K.ITEIYEGTSEVQR.M	1551.78	2.1		2
			K.LFAAETAMEVTTK.A	1466.77	2.17		2
			K.AVQLHGGYGYTR.D	1348.69	0		3
			K.DLGKPYGVEAAMAK.L	1532.83	0		3
			K.EYGGEGGDTVGYIMAVEELSR.V	2260.04	0		2
			K.EYGGEGGDTVGYIMAVEELSR.V	2260.04	0		3
			K.FQNTQFQLADMEVK.V	1753.87	0		2
			K.ITEIYEGTSEVQR.M	1551.78	0		3
			R.GSATSELIFEDCR.I	1511.69	0		2
WP_003422058.1	L-serine ammonia-lyase	L-serine			2.14	0.73	23
			K.IGSGPSSSHTMGPQR.A	1525.73	1.95		3
			K.SIDDGLSTDEIIPGK.L	1614.84	3.3		2
			R.AILYGSLAATGK.G	1219.72	2.14		2
			K.ETGIDMMDKYK.E	1413.69	0		3
			R.FKNENPDAESFR.A	1508.73	0		3
WP_003435635.1	glucose-6-phosphate isomerase	glucose-6-phosphate			2.14	12.63	23
			R.AAIDMVSHSFR.N	1260.63	2.14		3
			R.QLATEEGYETFVIPDDVGGR.F	2224.07	20		2
			K.QLYGESEGKENK.G	1464.75	0		3
			K.SGTTTEPALAFR.I	1277.66	0		2
			R.AAIDMVSHSFR.N	1260.63	0		2
			R.EAFQNPDLK.S	1116.58	0		2
			R.NITISSEEVDLDGLNYLAGK.T	2207.14	0		2
WP_003422953.1	serine hydroxymethyltransferase	serine			2.16	8.95	23
			K.ALAEELIK.R	941.58	1.98		2
			K.EALSDEFKEYQVQVAK.N	1968.03	2.22		3
			K.NTIPFDPNGALVTSGIR.L	1798.96	20		2
			R.TLVVGLTEK.Y	1014.63	2.1		2
			K.EALSDEFKEYQVQVAK.N	1968.03	0		2
			K.LISGGTDNHLILLDLTNK.N	1993.13	0		3
			K.MIVAGASAYPR.E	1162.62	0		2
			K.YPLYEEYNIMD.-	1476.65	0		2
WP_009903412.1	SIS domain-containing protein	SIS			2.16	0.35	2
			K.SSNFGSSDFYK.Y	1293.59	2.71		2
			K.TIAFTSNR.N	936.503	2.06		2
			K.VIFMGVGK.S	905.541	2.16		2
			K.TMVDVMTTEMNAIR.C	1638.78	0		2
WP_003417352.1	class II fructose-1,6-bisphosphate aldolase	class			2.17	5.66	23
			K.FLAENPK.E	873.496	2.05		2
			K.GVPVDMLR.K	913.505	2.06		2
			K.IDDVLGSANSIN.-	1244.62	1.54		2
			K.INMDTDLR.L	1004.5	2.14		2
			K.YAGPHTLVEMVK.A	1399.75	2.25		3
			K.YTQPAEAVEFVER.T	1565.77	2.21		2
			R.DAIQAVVESK.I	1114.62	1.93		2
			R.FDILEEIQSK.L	1276.69	2.5		2
			R.TGVDSLAIAIGTSHGAFK.F	1799.98	20		2
			R.TGVDSLAIAIGTSHGAFK.F	1799.98	2.3		3
			K.YAGPHTLVEMVK.A	1399.75	0		2
			K.YTQPAEAVEFVER.T	1565.77	0		3
			R.KFLAENPK.E	1029.62	0		2
WP_003431407.1	D-2-hydroxyacid dehydrogenase	D-2-hydroxyacid			2.19	0.29	23
			K.ILVFGAR.D	802.506	2.19		2
			K.MNPGELTDPEINK.L	1512.75	2.59		2
			R.AAALDTFETEGLFLNK.K	1795.94	1.75		2
			R.GGLINTGDLIEALESGK.I	1741.95	2.35		2
			R.GGLINTGDLIEALESGK.I	1741.95	1.97		3
			R.SITVGVIGTGK.I	1086.66	2.49		2
			R.WIAELLGTEVR.S	1313.73	2.19		2
			K.EADLITLHTPLLEGTK.H	1807.02	0		3
			R.AAALDTFETEGLFLNK.K	1795.94	0		3
			R.AAALDTFETEGLFLNKK.M	1952.07	0		3
			R.DYEEPVIK.K	1047.55	0		2
			R.DYEEPVIKK.W	1203.68	0		2
WP_003436400.1	FAD-dependent oxidoreductase	FAD-dependent			2.19	7.54	234
			K.GHDLENVFTLR.N	1327.69	2.3		3
			K.IDYIVVSHTEPDHAGSVEK.L	2152.09	2.04		4
			K.TIIVNDGAIKFDK.L	1516.89	20		2
			K.TIIVNDGAIKFDK.L	1516.89	2.08		3
			K.TLQTNVK.D	858.518	20		2
			K.VNLFDVIEHK.Q	1268.71	1.72		3
			K.VVASETAIK.Y	972.586	1.83		2
			R.ANTQMVQDTSVK.I	1376.7	2.39		2
			R.LGVAVDGIEGDGK.A	1284.69	1.91		2
			R.LNDLNIDFEK.I	1275.67	2.72		2
			K.DGSLVGAILINDLSCTVK.L	1931.05	0		2
			K.EDQFIEVEEDEVTFR.K	1912.88	0		2
			K.EDQFIEVEEDEVTFRK.D	2069	0		3
			K.ENLYWVGSLDPDLR.V	1703.85	0		2
			K.EVTICYVSAHGYTK.I	1682.83	0		2
			K.EVTICYVSAHGYTK.I	1682.83	0		3
			K.GDFEDIMK.A	1009.48	0		2
			K.IDYIVVSHTEPDHAGSVEK.L	2152.09	0		3
			K.IVNTLDENEEKDYLDALR.Y	2206.12	0		3
			K.TIIVNDGAIK.F	1098.66	0		2
			K.TLVTCDSFGSHYSNDK.I	1885.85	0		3
			K.VASVFGSYGWSGEGIENAMER.I	2274.05	0		2
			K.VASVFGSYGWSGEGIENAMER.I	2274.05	0		3
WP_003423106.1	IMP dehydrogenase	IMP			2.21	0.24	2
			K.VSEFMTPMSSIVYANK.D	1859.92	2.38		2
			R.GQATSIIEVAQAR.D	1370.75	2.04		2
			K.AGFVVSDSNIKPDNTLK.D	1889.03	0		3
			K.DNVTLSLSK.V	1031.59	0		2
			K.ITLDFIR.E	904.538	0		2
			K.LSFEEGVDSYVPYAGSLK.D	2017.01	0		2
			K.TGHSTVAVTEDGTSTGK.L	1702.84	0		2
			K.TGHSTVAVTEDGTSTGK.L	1702.84	0		3
			K.VSEFMTPMSSIVYANK.D	1859.92	0		3
			R.EGFLYLAEAGADFVK.V	1684.87	0		2
WP_009901692.1	chaperonin GroEL	chaperonin			2.21	0.14	2
			K.ALEEPLR.Q	854.486	2.05		2
			K.AVTVAVEELK.N	1113.66	2.32		2
			K.EADLSMLGR.A	1018.51	2.21		2
			K.ESTTIVDGSGDKK.A	1419.75	0		3
			K.HQVEQTTSDFDREK.L	1774.85	0		3
			K.NVTAGANPILLR.K	1265.75	0		2
			K.TNDVAGDGTTTATILAQAIIR.E	2130.14	0		2
			K.VGAATEVELK.E	1071.62	0		2
			R.IEDALNATR.A	1029.55	0		2
			R.IVETQEAISQVASISAGDEEVGK.L	2416.24	0		3
WP_003421190.1	transcription termination/antitermination factor NusG	transcription			2.22	0	2
			R.QVVVPTEEVVETTK.T	1612.89	2.22		2
			K.GVTGFVGPGSKPVPLSEDEVK.A	2183.19	0		3
WP_009903676.1	valine--tRNA ligase	valine--tRNA			2.23	12.57	2
			K.TAILPLVGR.E	966.623	2.23		2
			R.FTLTTGNSPGNDMR.F	1537.72	20		2
			K.MTPAHDPNDFEVGLR.H	1725.81	0		3
			K.SAALYTLTYVLEK.I	1526.86	0		2
WP_003420711.1	2-oxoacid:acceptor oxidoreductase family protein	2-oxoacid:acceptor			2.24	12.56	2
			K.EVSWLPSYGPEMR.G	1577.75	20		2
			K.IIVNSSLIK.E	1041.68	2.24		2
			K.VSDTVDIESVLEAFKK.V	1864.03	0		3
			R.TDVDVYYIPANELAAELGNDK.V	2366.17	0		2
WP_003437537.1	YebC/PmpR family DNA-binding transcriptional regulator	YebC/PmpR			2.24	8.92	23
			K.AKADNMPNDNIDR.A	1528.73	2.35		3
			K.EGGADPEYNAALK.T	1389.68	2.02		2
			K.GYEFISADVK.M	1183.61	20		2
			K.MIPQTTTVLTEESHLK.M	1884.01	2.13		3
WP_009897829.1	UDP-N-acetylmuramoyl-tripeptide--D-alanyl-D-alanine ligase	UDP-N-acetylmuramoyl-tripeptide--D-alanyl-D-alanine			2.24	0	2
			K.YLVDIVNPK.I	1115.66	2.24		2
			K.DTSLALGDISK.Y	1174.64	0		2
WP_003436174.1	DNA-directed RNA polymerase subunit beta	DNA-directed			2.25	0.33	2
			K.GENIPEPGIPESFK.V	1568.81	2.49		2
			R.LSALGPGGLSR.E	1054.61	2.02		2
			K.AIQNAGINVVNLLMDDDKK.V	2155.18	0		3
			K.GETELTAEER.L	1161.55	0		2
			K.ISAEDIINPETGEVFVK.A	1917.02	0		2
			K.TVEEGLVEIYKK.L	1490.86	0		3
			K.VLTDEDQEIEVR.E	1472.74	0		2
			R.DIPNVGDSAIK.N	1183.64	0		2
			R.EAPIIGTGIEYR.A	1345.72	0		2
			R.IGAEVDSGDILVGK.V	1427.79	0		2
			R.LSTIHIEEYECEAR.D	1776.84	0		3
			R.TVNGAVEMVPESR.V	1415.71	0		2
			R.VIGNNFVDIK.S	1173.68	0		2
WP_003430702.1	transketolase family protein	transketolase			2.29	8.01	2
			K.ALEAAEELAK.E	1099.61	1.44		2
			K.DVFGQSGTPADLLK.H	1502.8	20		2
			R.AATPDVNSENYK.F	1363.66	1.98		2
			R.GIPNMVVLNPADALEAR.Q	1806.97	2.76		2
			R.NSVAYPNLNVK.I	1273.7	2.29		2
			K.ELAENKDIVVLDADLGK.A	1926.08	0		3
			K.HYGLTTEDIVK.N	1330.71	0		2
			R.AATPDVNSENYKFEIGK.G	1967.01	0		3
			R.EGSDITVIATGIMVAK.A	1659.91	0		2
			R.GIPNMVVLNPADALEAR.Q	1806.97	0		3
WP_003420710.1	MFS transporter	MFS			2.3	0.17	23
			K.NVEVEEVK.-	1000.54	2.05		2
			K.YFNCDTQEAAHGR.A	1595.68	2.3		3
			R.NAETQGYPIR.V	1175.59	2.37		2
			R.APAAATGIK.R	854.523	0		2
			R.DNM(15.995)IPYYPLGNFK.N	406.152	0		2
			R.DNMIPYYPLGNFK.N	1626.81	0		2
WP_003434191.1	peptidylprolyl isomerase	peptidylprolyl			2.3	0.22	23
			K.IELYPNIAPNTVK.N	1526.87	1.98		2
			R.TDSADKPQTPQVMK.S	1628.84	2.41		3
			R.VIEGMDTVDEIASVR.T	1660.83	2.3		2
			K.GEFSGNGFTNNLK.H	1439.7	0		2
			K.SVTVETFGIDYSDVEKN.-	1958.96	0		2
			R.TMAPNSAGSQFFIMHK.N	1822.89	0		3
WP_003417090.1	trigger factor	trigger			2.31	7.92	2
			K.MASAYNMEVEK.I	1327.62	20		2
			K.SSLVLEAITK.A	1115.68	2.46		2
			K.TIDLLVDNATIA.-	1285.71	2.31		2
			K.VENTVSDENVDAK.L	1474.72	2.09		2
			R.IVIETQYGK.G	1105.64	2.27		2
			K.AEGIEATEEEFKAELEK.M	2007.01	0		3
			K.ITVDNNKFEAAVNK.A	1645.9	0		2
			R.DADKEDIKGQIK.I	1470.83	0		2
			R.TMEELREER.K	1219.59	0		2
WP_003427766.1	isocaprenoyl-CoA:2-hydroxyisocaproate CoA-transferase HadA	isocaprenoyl-CoA:2-hydroxyisocaproate			2.32	5.09	234
			K.DKPGFDYTAYFAR.G	1605.78	2.32		2
			K.DKPGFDYTAYFAR.G	1605.78	2.56		3
			K.EYTPAPK.V	860.464	2.38		2
			K.GTSPANTAAGFGDHYAGLALAAGSLAALHK.K	2866.48	2.32		4
			K.IEPIEGDGIR.V	1125.6	2.28		2
			K.IVGEAMLEK.T	1044.59	1.94		2
			K.LLSEADIFVTNVR.V	1503.83	2.2		2
			K.LLSEADIFVTNVR.V	1503.83	1.89		3
			K.MGIAYDQIK.D	1093.58	2.18		2
			K.MLGDWGAEVIK.I	1273.67	1.86		2
			K.SKEGVEILHK.L	1222.73	2.38		2
			K.SKEGVEILHK.L	1222.73	2.2		3
			K.SPASDDENPMFELENGNK.K	2049.9	2.93		2
			K.TYDSGNTGVLVNTPVMFR.N	1998.99	2.73		2
			K.TYDSGNTGVLVNTPVMFR.N	1998.99	2.51		3
			K.VGQHTVEVLK.S	1164.69	2.05		2
			K.VVELSSFIAAPCCAK.M	1706.87	3.14		2
			K.VVELSSFIAAPCCAK.M	1706.87	3.2		3
			R.ENPNSPLMTTYK.C	1449.72	2.9		2
			R.GGVSQSVMEK.G	1076.55	2.06		2
			R.NEGIKEYTPAPK.V	1429.78	20		2
			R.VMGGTFK.S	794.436	20		2
			R.WIQLALIQYNK.W	1444.84	2.29		2
			K.DKYPGLIFSQILGYGEK.G	2012.11	0		3
			K.KTYDSGNTGVLVNTPVMFR.N	2155.12	0		3
			K.SPASDDENPMFELENGNK.K	2049.9	0		3
			K.SPASDDENPMFELENGNKK.G	2206.03	0		2
			K.SPASDDENPMFELENGNKK.G	2206.03	0		3
WP_003438316.1	polyribonucleotide nucleotidyltransferase	polyribonucleotide			2.32	10.32	23
			K.IDGIDKEILQR.A	1354.78	1.94		3
			R.DGIDFFPLSVDYEEK.L	1829.88	2.32		2
			R.GQTQVLNVATLGALGDVQK.L	1968.11	20		3
			K.TISQPKPELSPYAPK.I	1738.99	0		3
			K.VAGTEYGITAIQMDIK.I	1764.93	0		2
			R.ALLPVIPSQEEFPYAIR.L	1971.09	0		2
WP_003438096.1	acetate kinase	acetate			2.33	7.95	2
			K.ILVLNCGSSSLK.Y	1345.76	20		2
			K.MLLIPTNEELMIAR.D	1670.91	2.68		2
			R.ADIASNMEFLGMK.L	1481.73	2.33		2
			R.GKETVISTADSK.V	1318.73	2.02		2
			R.IGIEGSILK.H	984.622	1.89		2
			K.EMKEIDAVGHR.V	1339.69	0		3
			K.ESGVYGMTGISSDFR.D	1632.75	0		2
			K.IVTCHLGNGASIAAVDGGK.C	1896	0		3
			K.SSYLYGLPHELYTK.Y	1726.9	0		3
			R.AQATLEAYVK.K	1148.64	0		2
			R.CGDIDPAILPFLMR.K	1644.84	0		2
WP_009901809.1	(R)-2-hydroxyisocaproyl-CoA dehydratase subunit HadB	(R)-2-hydroxyisocaproyl-CoA			2.33	0.18	23
			K.AQFEEVIK.Q	1018.57	2.26		2
			K.KFEEVMK.I	993.557	2.09		2
			K.KGSLELCEIAESK.G	1546.83	2.6		3
			K.LLIEELEDNMK.T	1401.74	2.02		2
			R.AAEETGLPYAGFDGDQADPR.A	2107.95	2.38		2
			R.AAEETGLPYAGFDGDQADPR.A	2107.95	2.53		3
			R.AFTNAQFETR.I	1211.59	2.43		2
			R.IQGLVEVMEER.K	1329.7	2.33		2
			R.RAAEETGLPYAGFDGDQADPR.A	2264.05	2.45		3
			R.VVINDLLAEQYANAFK.A	1864.02	2.2		2
			R.VVINDLLAEQYANAFK.A	1864.02	2.29		3
			K.CDGAFYHMNR.S	1297.53	0		2
			K.CDGAFYHMNR.S	1297.53	0		3
			K.LLIEELEDNM(15.995)K.T	1245.62	0		2
			K.YRVDSLVEGK.C	1220.68	0		2
			K.YRVDSLVEGK.C	1220.68	0		3
			R.IMMEGIPCWPYIGYK.M	1913.93	0		2
			R.RAAEETGLPYAGFDGDQADPR.A	2264.05	0		2
WP_003421448.1	ribose-phosphate pyrophosphokinase	ribose-phosphate			2.35	10.21	2
			K.ANVCEVMNLIGDVK.G	1616.83	20		2
			K.LVANLITAAGADR.V	1311.75	2.35		2
			K.TVAPLFGDAIR.M	1186.67	2.28		2
			K.DVYACCTHGVLSGPAIER.I	2032.95	0		2
			K.DVYACCTHGVLSGPAIER.I	2032.95	0		3
			R.MIFSNESVSK.L	1196.61	0		2
WP_003417347.1	electron transfer flavoprotein subunit alpha/FixB family pr	electron			2.37	0.21	24
			K.IAPVVIELLGEGR.K	1392.83	2.42		2
			K.ITQDDIR.T	887.471	2.37		2
			K.LDSVDDLLEAIKA.-	1456.8	2.76		2
			K.LGGVVGSSR.A	858.492	2.16		2
			K.NVWIFAEQR.E	1189.62	2.47		2
			K.VYVADDALLEK.Y	1290.71	2.26		2
			R.TGEVIALDYK.I	1163.64	2.28		2
			R.TTVLETVK.T	945.575	2.23		2
			R.VGTGLTADCTK.L	1177.6	2.36		2
			R.VGTGLTADCTKLEIDPEDKK.I	2302.22	2.77		4
			-.MNDIKDLSSYK.N	1396.73	0		2
			K.ELITFGADK.V	1048.58	0		2
			K.EVDAELCAILLGK.D	1485.81	0		2
			K.IAPVVIELLGEGRK.L	1548.96	0		3
			K.LDSVDDLLEAIKA.-	1456.8	0		3
			K.LEIDPEDKK.I	1169.65	0		2
WP_003421186.1	50S ribosomal protein L7/L12	50S			2.37	10.22	2
			K.EVVDNAPK.T	926.507	2.22		2
			K.TEFDVVLTDVGSSK.V	1551.8	20		2
			R.EITGLGLK.E	885.553	2.37		2
			K.EGASKEEADQIK.E	1387.72	0		2
			K.EGASKEEADQIKEK.L	1672.89	0		3
WP_003427763.1	(R)-2-hydroxyisocaproyl-CoA dehydratase subunit beta	(R)-2-hydroxyisocaproyl-CoA			2.39	4.55	23
			K.DIDGVIFCMMK.F	1383.66	2.46		2
			K.EVVENPNAAVK.K	1224.67	2.23		2
			K.FCDPEEYDYPLVR.K	1729.77	3.11		2
			K.HSNTIKPSIR.S	1207.7	2.39		2
			K.HSNTIKPSIR.S	1207.7	2.27		3
			K.IHESIEVYNEHR.K	1552.76	20		3
			K.IHESIEVYNEHRK.T	1708.89	2.56		3
			K.LNAMPEEVCSGK.K	1389.66	2.96		2
			K.MKEVVENPNAAVK.K	1511.84	2.23		3
			K.SAVPHIK.Y	806.501	2.83		2
			R.ELEEICGYEIEEAK.I	1766.83	2.26		2
			R.GSLIVDEVK.K	1014.6	2.06		2
			R.IQTFAEMMSLA.-	1268.61	2.09		2
			R.KEEHTELVK.D	1195.68	1.9		2
			R.QWSNIEGCSLAYDPK.K	1822.86	2.57		3
			-.MEAILSK.M	846.489	0		2
			K.IHESIEVYNEHR.K	1552.76	0		2
			K.LNAMPEEVCSGKK.V	1545.79	0		2
			K.MKEVVENPNAAVK.K	1511.84	0		2
			K.MKEVVENPNAAVKK.Y	1667.96	0		3
			K.RELEEICGYEIEEAK.I	1923.93	0		2
			K.TMRDFVEVAYK.H	1413.73	0		3
			K.VLLTGILADSK.D	1184.74	0		2
			R.DFVEVAYK.H	1025.54	0		2
			R.QWSNIEGCSLAYDPK.K	1822.86	0		2
			R.TDVPAGDDALER.L	1285.62	0		2
WP_003437561.1	hypothetical protein	hypothetical			2.42	0	2
			K.SQFIVTLIK.I	1103.7	2.42		2
			K.IVDEYDYGYNAIYK.C	1781.86	0		2
WP_009903275.1	aminopeptidase P family protein	aminopeptidase			2.44	0.33	23
			K.ATVSGELTEK.Q	1089.59	2.44		2
			K.RAEAIVKPGVR.F	1250.78	2.87		3
			R.LNAVLEQMK.K	1100.63	2.22		2
			K.GYGQYFTHR.T	1155.55	0		2
			R.AEAIVKPGVR.F	1094.68	0		2
			R.EIFEIVLEANKR.A	1515.87	0		3
			R.FLLNLIELCGGSK.F	1518.85	0		2
			R.IEDLVLVTEDGCEILNK.H	2016.05	0		3
			R.LNAVLEQMKK.D	1256.75	0		3
WP_009889131.1	peptidylprolyl isomerase	peptidylprolyl			2.5	0.39	23
			K.EITNIDIENALK.S	1427.79	2.58		2
			K.GEVSEPVK.T	899.496	2.73		2
			K.HILVDSDEK.A	1110.59	1.62		2
			K.KIEENVLK.Q	1055.66	2.5		2
			K.LEDLQESTESTFDEVKAEVEK.S	2510.24	2.64		3
			K.SEEISFEDAALK.H	1393.7	2.27		2
			K.VLATVGEK.E	871.538	2.09		2
			K.DMGGDLGTFGR.G	1152.52	0		2
			K.HILVDSDEKAK.E	1337.76	0		3
			K.LEDLQESTESTFDEVK.A	1925.92	0		2
			K.LEDLQESTESTFDEVK.A	1925.92	0		3
			K.VLSSVNVTEDEKVK.F	1629.92	0		3
			R.GQM(15.995)VPEFEEAVFSMAK.G	362.162	0		3
			R.GQMVPEFEEAVFSM(15.995)AK.G	1627.73	0		3
			R.GQMVPEFEEAVFSMAK.G	1855.89	0		2
			R.GQMVPEFEEAVFSMAK.G	1855.89	0		3
WP_003435129.1	lactate utilization protein	lactate			2.51	0	2
			K.VIVIAGVNK.I	967.643	2.51		2
			-.MDQNLNWLNEK.R	1459.71	0		2
WP_009901578.1	pyridoxal phosphate-dependent aminotransferase	pyridoxal			2.51	0.04	2
			K.SYGIDSLNK.D	1051.56	2.54		2
			K.YDLVPGLK.I	959.569	2.48		2
			K.DCSIDIDNMVK.T	1364.63	0		2
			K.ILVINNPSNPTGSVYTK.D	1873.04	0		2
			K.LIEENNCNYSIDEIVVSSGAK.N	2410.18	0		2
			K.LVNAVPVFIDTK.K	1370.82	0		2
			K.LVNAVPVFIDTKK.E	1526.94	0		3
			K.SYGIDSLNKDYTK.Y	1586.82	0		3
			K.VINLSIGEPDFNVPNNAK.S	1997.07	0		2
			R.ISYACSENTFLSGLDK.L	1860.9	0		2
WP_003438103.1	beta-ketoacyl-ACP synthase II	beta-ketoacyl-ACP			2.52	8.83	23
			K.FAQFAIVSAK.L	1136.66	2.39		2
			K.GPNTNVCTACASGTHSIGDAFK.V	2321.06	1.99		3
			K.ITNFDASTYQTQIAGEVK.N	2042.04	2.65		2
			K.LAVEDANLDLDKVDR.E	1740.93	20		2
			K.ITNFDASTYQTQIAGEVK.N	2042.04	0		3
			K.LAVEDANLDLDKVDR.E	1740.93	0		3
			R.YALSNSLGFGGHNATIVLK.K	2018.1	0		3
WP_009903701.1	glycyl radical protein	glycyl			2.54	12.35	2
			K.GLDNMANLVR.A	1129.59	2.54		2
			R.TLQDEIIGR.T	1071.59	20		2
			K.KQIGIETGDPR.N	1268.71	0		2
			R.AVLMTEAYK.K	1080.59	0		2
			R.YIQGVGIGTITDSLTAIK.Y	1906.09	0		2
WP_003421367.1	F0F1 ATP synthase subunit alpha	F0F1			2.56	0.38	23
			R.EAYPGDVFYLHSR.L	1580.76	2.56		3
			R.STIAQLVSSLEK.G	1330.77	2.25		2
			R.SVYEPLQTGIK.S	1289.72	3.01		2
			R.EAYPGDVFYLHSR.L	1580.76	0		2
			R.ELAAFSQFGSDLDEDTK.K	1928.91	0		2
			R.IVEVPVGEALIGR.V	1378.82	0		2
WP_003428474.1	FprA family A-type flavoprotein	FprA			2.57	7.75	235
			K.DGEILNIGK.R	1013.58	1.98		2
			K.DPMAAVK.R	786.431	20		2
			K.HYYDCIVKPFAK.H	1623.85	4.31		3
			K.IDYVVIHHTEPDHAGSLK.Y	2087.09	2.57		5
			K.VILLGSPTINK.T	1209.77	2.32		2
			K.DIYFTGVVDEGLK.V	1510.79	0		2
			K.FFPSEETLK.E	1152.61	0		2
			K.HVLSAVDK.V	923.544	0		2
			K.IDYVVIHHTEPDHAGSLK.Y	2087.09	0		3
			K.IDYVVIHHTEPDHAGSLK.Y	2087.09	0		4
WP_003432442.1	3-methyl-2-oxobutanoate dehydrogenase subunit VorB	3-methyl-2-oxobutanoate			2.57	0.17	2
			K.SAIDILR.E	814.491	2.69		2
			R.GGPGLGSIQPSQADYFMSTR.G	2097	2.45		2
			K.SAIDILREEGIK.A	1398.81	0		2
			R.ELPPKDWATVGTK.G	1524.86	0		3
			R.GGPGLGSIQPSQADYFM(15.995)STR.G	1751.82	0		2
			R.VM(15.995)TSSSSPGVALK.Q	276.151	0		2
			R.VMTSSSSPGVALK.Q	1318.72	0		2
WP_003434963.1	lysine--tRNA ligase	lysine--tRNA			2.57	0	2
			K.AGFIDIQDQEGR.I	1375.67	2.57		2
			K.EYSGVDFSTINTDEEALEVAR.E	2373.11	0		2
			R.DVLLFPTMKPIDNNPNKEEEN.-	2541.29	0		3
			R.ELGDDEAFEMDEDFLK.A	1958.85	0		2
			R.YVDLIVNPEVK.N	1343.77	0		2
WP_003429267.1	50S ribosomal protein L9	50S			2.58	0.35	2
			K.MAVQADSVAIK.E	1187.66	2.33		2
			R.SLGSTFVEIK.I	1135.65	2.83		2
			K.ILLDEPIR.S	995.601	0		2
WP_009902717.1	radical SAM protein	radical			2.58	0.21	2
			K.IGVETFDNYFR.N	1387.68	2.72		2
			R.EYFEIPVVFK.I	1325.73	2.43		2
			K.ATVNVFINNSSSIK.R	1548.85	0		2
WP_004454042.1	serine dehydratase subunit alpha family protein	serine			2.59	0.24	23
			K.AESLMDTVTIQELIK.N	1745.95	2.2		2
			K.AKELLGEEIVENR.M	1554.86	2.61		2
			K.AKELLGEEIVENR.M	1554.86	2.56		3
			K.ALAISHLVTGYIK.N	1440.87	2.62		3
			K.ELLGEEIVENR.M	1327.7	2.38		2
			K.ELVEMLK.A	916.53	2.49		2
			K.KFPQSDER.L	1061.55	2.66		2
			K.MNEEMAEYGLK.Q	1369.63	3.06		2
			K.TGIGVGYGIK.K	1019.6	2.57		2
			R.MLVSPSIYK.N	1092.63	2.88		2
			K.AESLMDTVTIQELIK.N	1745.95	0		3
			K.AEVKPAVGCTEPVALALACAK.A	2239.22	0		3
			K.DIEFLLDGVK.M	1203.68	0		2
			K.IAEDYM(15.995)DNTPLSITPADTR.E	768.336	0		2
			K.IAEDYMDNTPLSITPADTR.E	2151.02	0		2
			K.LSSAASAAIQSAIIAK.Q	1556.91	0		2
			K.LSSAASAAIQSAIIAK.Q	1556.91	0		3
			K.MPVMSSNGSGNHGLTAILPIVAYNK.K	2627.36	0		3
			K.NGMCVGIPGTER.L	1317.62	0		2
WP_004454961.1	sugar ABC transporter substrate-binding protein	sugar			2.59	0	2
			K.SGTSDNYLYLDDAK.M	1616.76	2.59		2
			K.DSNEMIESVFGPGK.A	1564.74	0		2
			K.LLEYMLSK.E	1051.6	0		2
			K.TVGSFASVDDLTLMSACK.N	1957.96	0		2
			K.TVGSFASVDDLTLMSACK.N	1957.96	0		3
			K.YIPEDALSK.D	1090.59	0		2
WP_009888223.1	2-hydroxyisocaproyl-CoA dehydratase activator HadI	2-hydroxyisocaproyl-CoA			2.6	0.35	2
			R.FLDVMAK.I	878.494	2.36		2
			R.TIIDIGGQDAK.V	1185.66	2.85		2
			K.IEDIVAGIHTSVAK.R	1507.86	0		2
			K.NGEDIVASETISSGTGTTGPSR.V	2164.03	0		2
			K.QISELSCHAR.G	1227.6	0		3
WP_003422204.1	transcription elongation factor GreA	transcription			2.61	0	2
			K.EVVEVQVPDGVAK.F	1423.79	2.61		2
			K.ISNESPVGK.A	985.544	0		2
WP_003427760.1	electron transfer flavoprotein subunit beta/FixA family pro	electron			2.63	5.98	23
			K.LDIPQVTYVQDFK.I	1620.88	2.61		2
			K.LDIPQVTYVQDFK.I	1620.88	1.46		3
			K.QVPDTNEVR.I	1084.55	2.55		2
			K.VGDYDIIFAGR.Q	1252.65	2.65		2
			K.VWTIDDLDVNKEEVGLK.A	2057.11	2.79		2
			K.VWTIDDLDVNKEEVGLK.A	2057.11	2.65		3
			R.AFGGADTWATSNTIAAGISK.V	1995.01	2.9		2
			R.DGVPSILNPDDANALEEALK.I	2137.1	2.82		2
			R.DGVPSILNPDDANALEEALK.I	2137.1	2.49		3
			R.ECLAMGADDAILLSDR.A	1776.84	20		2
			R.GKGEILEGK.A	1013.61	2.22		2
			R.GKGEILEGKADEIASK.I	1756	20		3
			R.QAIDGDTAQVGPQIAEK.L	1795.93	2.24		2
			R.QAIDGDTAQVGPQIAEK.L	1795.93	2.41		3
			R.QLEDGYELIK.V	1262.68	2.42		2
			R.SFTPEPR.G	860.439	2.9		2
			K.VSTPVLLTAVK.E	1182.76	0		2
			R.AFGGADTWATSNTIAAGISK.V	1995.01	0		3
			R.ECLAM(15.995)GADDAILLSDR.A	650.277	0		2
WP_009888019.1	anaerobic carbon-monoxide dehydrogenase catalytic subunit	anaerobic			2.63	0.58	23
			K.ANAEYIGLDR.S	1148.58	3.13		2
			K.DLTGGHVIVNPDPK.S	1516.82	2.63		3
			K.ELGIMPGGAK.S	1027.57	2.34		2
			K.GVAAVVGCSNMTAGGHDVNTVELTK.E	2543.26	2.65		3
			K.KANAEYIGLDR.S	1304.71	2.94		3
			K.LKDLTGGHVIVNPDPK.S	1787.04	3.38		3
			K.LVTEVLTEK.L	1086.65	2.04		2
			K.SEVFDAIVK.S	1062.6	2.57		2
			K.SRDDKMELVEK.I	1432.76	3.06		3
			K.TLNQLAEMFGIESDEKYDK.C	2315.14	2.45		3
			R.AVASGAACYLHVVENTAK.N	1916.99	2.85		3
			R.GICGADADTIVAR.N	1345.67	2.38		2
			R.SKLDELSNTLIEK.A	1572.9	1.07		2
			K.DHGFEQSLTGVSEK.N	1588.77	0		3
			K.DLTGGHVIVNPDPK.S	1516.82	0		2
			K.DVETAFHR.T	1001.49	0		2
			K.KANAEYIGLDR.S	1304.71	0		2
			K.LKDLTGGHVIVNPDPK.S	1787.04	0		4
			K.LVGCTCVGQDLQLR.G	1645.83	0		2
			K.MVCLDDVAK.K	1105.55	0		2
			K.NLGLKDVECNA.-	1287.65	0		2
			K.SSANQLEEIIIDRR.K	1670.9	0		3
			K.VADKVINDLYK.S	1360.8	0		2
			K.VADKVINDLYK.S	1360.8	0		3
			K.WKELGIMPGGAK.S	1369.78	0		3
			R.AVASGAACYLHVVENTAK.N	1916.99	0		2
			R.SKLDELSNTLIEK.A	1572.9	0		3
WP_009889571.1	nucleoside hydrolase	nucleoside			2.63	0	2
			K.VSIIALAPLTNIAK.A	1478.94	2.63		2
			K.AFENLDEFVSMGGAFR.I	1817.85	0		2
			K.KNPNAIVLNEVDEK.K	1665.93	0		3
			K.LVTAQDTHGEDGIGENFYQK.V	2278.09	0		3
			K.NGAVDFIINTLHNHEK.V	1877.98	0		3
			K.VSIIALAPLTNIAK.A	1478.94	0		3
			K.YITEITR.F	922.512	0		2
			R.KLVTAQDTHGEDGIGENFYQK.V	2434.22	0		3
			R.KLVTAQDTHGEDGIGENFYQK.V	2434.22	0		4
WP_003427762.1	acyl-CoA dehydrogenase family protein	acyl-CoA			2.64	4.21	23
			K.ALQLHGGYGFIK.D	1358.77	2.67		3
			K.ELDTLPAEMDK.T	1316.65	2.67		2
			K.ELDTLPAEMDKTGVMPK.E	1959.01	3.45		3
			K.FISSNIPEEYGGGGAGYVSYAIVMEEIAR.R	3107.5	20		3
			K.FQNTQFTIADMETK.V	1728.84	2.87		2
			K.FQNTQFTIADMETK.V	1728.84	4.71		3
			K.IAMGTLEVGR.I	1073.59	2.39		2
			K.MVISSNVLK.-	1045.62	2.34		2
			K.YYASEIANEVAYK.A	1575.78	2.64		2
			R.GLVYDAAQK.R	1019.57	2.28		2
			R.GLVYDAAQKR.D	1175.67	3.45		2
			R.GTETSDLIFENVK.V	1507.78	2.43		2
			R.GTETSDLIFENVK.V	1507.78	2.42		3
			R.GTETSDLIFENVKVPK.E	1861.03	3.56		3
			R.IVSIYEGTSEVQK.M	1507.81	2.58		2
			R.IVSIYEGTSEVQK.M	1507.81	2.63		3
			R.VAQESAMAK.Y	989.522	2.32		2
			K.ALQLHGGYGFIK.D	1358.77	0		2
			K.ALQLHGGYGFIKDYEIER.M	2165.14	0		4
			K.ELDTLPAEMDKTGVMPK.E	1959.01	0		2
			K.WDGFSTGAHEDK.M	1404.63	0		2
			K.WDGFSTGAHEDK.M	1404.63	0		3
			R.GTETSDLIFENVKVPK.E	1861.03	0		2
			R.GTSAFIVESK.W	1093.6	0		2
			R.VQFGKPIAK.F	1070.69	0		2
WP_003438357.1	pyridoxal phosphate-dependent aminotransferase	pyridoxal			2.67	7.8	23
			K.AIILSNPGNPTGAIYTK.E	1786.01	2.55		2
			K.EGLEQYVALQK.-	1332.73	2.68		2
			K.GFFDAVK.N	838.459	2.36		2
			R.LAYILNEK.D	1018.61	2.67		2
			R.VSAMQASPIRK.L	1242.71	20		3
			K.GLIAQILK.L	910.621	0		2
			R.DVLYNELMK.V	1179.62	0		2
			R.VIIIDSVSK.R	1028.65	0		2
			R.VIIIDSVSKR.Y	1184.75	0		3
WP_003434936.1	SEC-C domain-containing protein	SEC-C			2.68	0.07	23
			K.FWEEYLK.V	1069.55	2.64		2
			K.VEAGIYNEILNNK.M	1531.82	2.63		2
			R.NLSDNHESQEAEVK.F	1654.78	2.73		2
			R.NLSDNHESQEAEVK.F	1654.78	2.77		3
			K.MDVVEGK.V	832.436	0		2
			K.VEAGIYNEILNNK.M	1531.82	0		3
WP_003420866.1	NAD-specific glutamate dehydrogenase	NAD-specific			2.72	5.69	23
			K.DVNVFEMAQSQVK.N	1549.78	2.72		2
			K.EHGNLLNFPGAK.R	1351.72	2.33		2
			K.EHGNLLNFPGAK.R	1351.72	3.2		3
			K.GGIIVDPSTLSQGELER.L	1797.95	20		2
			K.LVCEAANGPTTPEADEVFAER.G	2304.08	4.16		2
			R.EAAYMHSIK.K	1104.56	4.39		2
			R.GYIDGIYK.L	983.533	2.42		2
			R.TAATGFGVAVTAR.E	1248.68	2.69		2
			R.VIEVSIPVK.M	1038.67	2.64		2
			K.CSVTGIPYGGGK.G	1250.63	0		2
			K.DVNVFEMAQSQVK.N	1549.78	0		3
			K.IAVQGIGNVGSYTVLNCEK.L	2078.09	0		2
			K.IAVQGIGNVGSYTVLNCEK.L	2078.09	0		3
			K.LGMEPAVYELLKEPMR.V	1932.03	0		3
			K.LTGQSSIGVITGKPVEFGGSLGR.T	2316.29	0		3
			K.LVCEAANGPTTPEADEVFAER.G	2304.08	0		3
			R.EAAYMHSIKK.V	1260.69	0		2
			R.EAAYMHSIKK.V	1260.69	0		3
			R.FHQNVSRDEVK.A	1413.74	0		2
WP_003432446.1	glutamine--fructose-6-phosphate transaminase (isomerizing)	glutamine--fructose-6-phosphate			2.84	7.06	23
			K.EIHEQPTGVR.E	1192.62	20		3
			K.GTPVIAIATQEK.L	1282.75	3.01		2
			K.HGTIALIEK.G	1036.63	2.58		2
			K.IQEILDNEEYIK.E	1561.82	3.3		2
			R.EFYDSMISK.M	1174.56	2.67		2
			R.GYDSAGVAVNSSNEK.E	1552.74	2.12		2
			K.AAEVIVEGLSK.L	1170.69	0		2
			K.IQEILDNEEYIKEVAK.T	2018.1	0		3
			K.TVVSSEHAFYLGR.G	1492.77	0		2
			R.ESDDVFYTWAGPEVAVASTK.A	2228.07	0		2
			R.ESDDVFYTWAGPEVAVASTK.A	2228.07	0		3
			R.GAYALGVICK.E	1106.62	0		2
			R.GAYVVAIAQSHNKDVEK.A	1913.05	0		3
			R.GAYVVAIAQSHNKDVEK.A	1913.05	0		4
			R.GYDSAGVAVNSSNEKELNIR.K	2179.09	0		3
			R.KAAEVIVEGLSK.L	1326.81	0		2
			R.KAAEVIVEGLSK.L	1326.81	0		3
WP_003419074.1	TIGR03960 family B12-binding radical SAM protein	TIGR03960			2.99	0	2
			K.TSLMEAVVAR.G	1103.6	2.99		2
			K.GVTEEDLENATER.A	1489.69	0		2
			K.ISSIEGVYIPSFYDVK.Y	1873	0		2
			K.LIVPYIDTVHDR.I	1467.81	0		3
WP_003421197.1	FAD-dependent thymidylate synthase	FAD-dependent			2.99	0.28	2
			K.VAPILFK.K	842.563	2.79		2
			R.NLAVEMLR.E	972.543	3.18		2
			K.LEQFEYIIPPEIEK.I	1803.97	0		2
			K.LEQFEYIIPPEIEK.I	1803.97	0		3
WP_003428486.1	RnfABCDGE type electron transport complex subunit B	RnfABCDGE			3.01	0	2
			K.VGEIMGISAEAGEK.Q	1445.74	3.01		2
			K.GIIITKPESQEVVVECNSK.E	2214.2	0		3
WP_003416297.1	50S ribosomal protein L28	50S			3.06	0	2
			R.AIIDGAPK.R	839.512	3.06		2
WP_004454864.1	sugar ABC transporter substrate-binding protein	sugar			3.17	0	2
			K.SGLEAANFLK.E	1104.62	3.17		2
			K.DSNEMIESVFGPGK.A	1564.74	0		2
			K.EDKEQSIYIK.T	1335.73	0		2
			K.EDKEQSIYIK.T	1335.73	0		3
			K.ELQAYVPEDSLSK.D	1533.79	0		2
			K.ELQTMISGDK.T	1176.61	0		2
			K.LVLWMPPVENNMK.E	1625.87	0		2
WP_003432462.1	methionine adenosyltransferase	methionine			3.29	0.06	2
			K.TGEEIEEEIEK.V	1360.66	3.25		2
			R.FVIGGPQGDTGLTGR.K	1501.79	3.33		2
			K.EVIPAELLDEETK.I	1540.82	0		2
			K.TGLVDYLRPDGK.T	1388.77	0		3
			K.TQVTVEYEGSK.A	1295.66	0		2
WP_003428343.1	hypothetical protein	hypothetical			3.41	0	2
			K.GLAEGLEISAESK.E	1358.73	3.41		2
WP_004454531.1	TerD family protein	TerD			3.42	0	2
			R.VLNSENDEEILR.Y	1457.74	3.42		2
WP_003420701.1	phosphate butyryltransferase	phosphate			3.67	0.26	2
			K.IANAILVGDIEK.T	1310.78	3.49		2
			R.SFEEVIK.F	906.506	3.86		2
			K.ALVFFSK.S	866.527	0		2
			K.SVELVSQGK.A	1001.58	0		2
			R.ADILLAPDIEGGNILYK.A	1871.05	0		2
			R.TGNVLSHVAVFDVEGYDR.L	2005.99	0		3
WP_009902143.1	formate C-acetyltransferase	formate			3.87	5.34	23
			-.MNAWQGFK.T	1036.52	20		2
			K.EAVQWLYFGYLGAVK.D	1799.97	3.64		2
			K.ELETIVGLQTDAPLKR.A	1839.05	3.99		3
			K.EQQLDVINR.T	1141.61	3.83		2
			K.ERENGGTLDVDTK.T	1488.74	3.91		3
			K.KLWDEAMVLFK.K	1462.83	2.94		2
			K.KLWDEAMVLFK.K	1462.83	3.85		3
			K.LPYEHAQDGISNTFSIVPGALGK.D	2470.29	4		3
			K.LWDEAMVLFK.K	1306.7	3.59		2
			K.MAESYGFDISKPATNSK.E	1929.96	3.89		2
			K.MAESYGFDISKPATNSK.E	1929.96	3.73		3
			K.QMQFFGAR.V	1011.5	3.45		2
			K.SGIITGLPDAYGR.G	1346.72	3.98		2
			K.SLEVSCMDEEVIR.L	1593.74	3.75		2
			K.THNQGVFDVYTPEMR.A	1820.85	3.17		2
			K.TLLYAINGGVDEK.S	1447.79	4.38		2
			K.TLLYAINGGVDEK.S	1447.79	20		3
			K.VSIDTSSVQYENDDLMR.A	1999.92	3.42		2
			K.VSIDTSSVQYENDDLMR.A	1999.92	3.38		3
			R.AGAPFAPGANPMHGR.D	1477.72	4.28		3
			R.ATLEDAMEHPEEYPQLTIR.V	2271.09	5.78		2
			R.ATLEDAMEHPEEYPQLTIR.V	2271.09	4.86		3
			R.AVMPYGGIK.M	990.557	3.7		2
			R.DTNGALASLSSVAK.L	1388.75	4.71		2
			R.ENGGTLDVDTK.T	1203.6	2.55		2
			R.FEPITSEYLDYDEVMSK.F	2121.99	3.53		2
			R.KSGIITGLPDAYGR.G	1502.85	3.54		2
			R.KSGIITGLPDAYGR.G	1502.85	3.63		3
			R.NSYPTQSILTITSNVVYGK.K	2141.14	4.61		2
			R.NSYPTQSILTITSNVVYGK.K	2141.14	3.94		3
			R.TMACGMAGLSVCADSLSAIK.H	2099	20		2
			R.TSTFLDIYFER.D	1418.71	4.03		2
			R.VALYGVDALIEDKNEQK.K	1989.09	20		3
			R.VSGYAVNFIK.L	1152.65	1.82		2
			K.AGIVTEEELQEYMDHFVM(15.995)K.L	2168.98	0		3
			K.EAVQWLYFGYLGAVK.D	1799.97	0		3
			K.ELETIVGLQTDAPLKR.A	1839.05	0		2
			K.ERENGGTLDVDTK.T	1488.74	0		2
			K.LPQGFKDFCSK.V	1409.74	0		3
			K.MVENSCEAFGYELDPEIK.D	2186.99	0		2
			K.SLEVSCM(15.995)DEEVIR.L	852.372	0		2
			K.THNQGVFDVYTPEM(15.995)R.A	1664.75	0		3
			K.TVSGIAAYAPGYLDK.E	1580.85	0		2
			K.VSIDTSSVQYENDDLM(15.995)R.A	1842.82	0		2
			K.YSYEALEM(15.995)ALHDR.D	1032.45	0		3
			K.YSYEALEMALHDR.D	1624.76	0		3
			R.AGAPFAPGANPM(15.995)HGR.D	1127.54	0		3
			R.AGAPFAPGANPMHGR.D	1477.72	0		2
			R.ATLEDAM(15.995)EHPEEYPQLTIR.V	777.358	0		3
			R.AYWGDDYGIACCVSAMR.I	2022.85	0		2
			R.DTNGALASLSSVAK.L	1388.75	0		3
			R.EFIQLNYSPYEGNDSFLAGATENTK.K	2864.36	0		2
			R.EFIQLNYSPYEGNDSFLAGATENTK.K	2864.36	0		3
			R.EFIQLNYSPYEGNDSFLAGATENTKK.L	3020.48	0		3
			R.FEPITSEYLDYDEVM(15.995)SK.F	1878.83	0		2
			R.FEPITSEYLDYDEVM(15.995)SK.F	1878.83	0		3
			R.FEPITSEYLDYDEVMSK.F	2121.99	0		3
			R.KTHNQGVFDVYTPEMR.A	1977.98	0		3
			R.LREEITEQISALNELK.K	1942.08	0		3
			R.LREEITEQISALNELKK.M	2098.21	0		4
			R.NEQGIAVDFEIEGDYPK.Y	1979.96	0		2
			R.RAGAPFAPGANPM(15.995)HGR.D	1283.64	0		3
			R.TMACGMAGLSVCADSLSAIK.H	2099	0		3
			R.VALYGVDALIEDKNEQKK.S	2145.21	0		3
			R.VALYGVDALIEDKNEQKK.S	2145.21	0		4
WP_003424083.1	hypothetical protein	hypothetical			3.88	0	2
			K.ITLPETAIDTLK.S	1369.81	3.88		2
			K.SILKDNQDKPNNIR.V	1737.97	0		3
			R.VYFAGVGCGGPSFGLALDEK.K	2100.04	0		2
WP_009901581.1	anaerobic ribonucleoside triphosphate reductase	anaerobic			4	1.04	2
			K.LSEQLTQEVIK.F	1342.77	3.51		2
			R.AGAQVPFSSVNFGTDTSEEGR.M	2184.02	4		2
			R.GNISFTTVNLPR.L	1345.74	5.5		2
			K.AIEEITFEDAEDADIKR.E	2021	0		3
			K.ANLDGFFEELDEK.I	1581.76	0		2
			K.INLVIEQLLER.L	1366.82	0		2
			K.MQNFAFEESYR.E	1448.64	0		2
			K.NIVYNTEKETNQK.V	1663.88	0		2
			K.RDELYLNLEK.K	1347.74	0		3
			K.TSEEYIIYR.T	1200.6	0		2
			K.YSESVPSVEDIQDSVVK.V	1936.97	0		2
			R.DELYLNLEK.K	1191.64	0		2
			R.VLSNVCGSETVSGR.G	1491.74	0		2
WP_003418513.1	rubrerythrin family protein	rubrerythrin			5.53	7.61	24
			K.DAAAGENYEWTDMYAK.F	1890.82	20		2
			K.EGYNQIAAIFEETANNEKEHAK.L	2590.27	5.5		4
			K.IAYLFEAVGK.I	1165.67	4.68		2
			K.LLENLNEGK.I	1084.61	1.72		2
			K.NLMAGFAGESEAR.N	1379.65	5.93		2
			R.KEGYNQIAAIFEETANNEKEHAK.L	2746.4	5.53		4
			R.NKYTYYASK.A	1220.64	20		2
			K.EGYNQIAAIFEETANNEK.E	2097.01	0		2
			R.KEGYNQIAAIFEETANNEK.E	2253.14	0		3
			R.KEGYNQIAAIFEETANNEKEHAK.L	2746.4	0		5
			R.NKYTYYASK.A	1220.64	0		3
WP_003420374.1	thioredoxin	thioredoxin			6.46	1.02	23
			K.DGKPVETLIGFMPK.N	1614.91	5.74		2
			K.DGKPVETLIGFMPK.N	1614.91	7.18		3
			K.DGKPVETLIGFM(15.995)PK.N	1361.73	0		3
WP_003430159.1	NifB/NifX family molybdenum-iron cluster-binding protein	NifB/NifX			8.15	1.87	23
			K.ALSGTAVDAVVVGGIGQGAIIK.L	2052.2	8.15		3
			K.SLDNGDLDHEHGK.C	1491.7	9.89		3
			R.AEGDTISANLDLLK.N	1514.82	6.16		2
			K.ALSGTAVDAVVVGGIGQGAIIK.L	2052.2	0		2
			K.GLDSKPYGHFGSAPIFVVCDLESGEVK.S	2992.51	0		3
			K.SLDNGDLDHEHGK.C	1491.7	0		2
			K.VCIPVEENK.G	1142.6	0		2
			K.VYRAEGDTISANLDLLK.N	1934.06	0		3
			R.AEGDTISANLDLLK.N	1514.82	0		3
WP_003430704.1	transketolase	transketolase			11.22	10.2	23
			K.GFFPEEELITLR.K	1477.78	2.21		2
			K.GHAAPALYATLAEK.G	1467.81	20		2
			K.GHAAPALYATLAEK.G	1467.81	20		3
			K.MNVCAENPK.M	1117.53	2.45		2
			K.GFFPEEELITLRK.F	1633.91	0		3
			K.VAGIDMSTGSLGQGLSAANGMALAGK.L	2433.24	0		3
WP_003435867.1	methionine--tRNA ligase	methionine--tRNA			11.66	11.79	2
			K.GLEDLSVTR.T	1016.55	3.32		2
			R.IIATLINPIMNETANK.I	1811.02	20		2
			K.GNVVYPEPIIER.Y	1412.77	0		2
			K.GQDDITTWESTK.T	1435.68	0		2
			K.VFKGEPLFPR.L	1244.73	0		3
			R.IIATLINPIMNETANK.I	1811.02	0		3
			R.INYDLANDLGNLISR.T	1717.9	0		2
			R.TTFDWGIK.V	1022.54	0		2
WP_009903754.1	porphobilinogen synthase	porphobilinogen			11.86	11.52	2
			K.AGADMVAPSDMMDGR.I	1550.65	20		2
			R.AGADIIITYFAK.D	1337.76	3.71		2
			K.AGADM(15.995)VAPSDMMDGR.I	491.205	0		2
			K.YASNYYGPFR.E	1264.59	0		2
			R.EAAHSAPSFGDR.K	1271.59	0		2
			R.EAAHSAPSFGDRK.T	1427.72	0		3
			R.EALDENGLENVGIMAYSVK.Y	2108.05	0		2
contaminant_KERATIN04	no description	no			12.17	8.8	23
			K.TRLEQEIATYR.S	1406.75	3.87		2
			K.TRLEQEIATYR.S	1406.75	4.34		3
			R.ALEEANADLEVK.I	1356.71	3.61		2
			R.QSVEADINGLR.R	1228.64	20		2
			R.QSVEADINGLRR.V	1384.74	20		2
			R.QSVEADINGLRR.V	1384.74	20		3
			K.EVSTNTAM(15.995)IQTSK.T	879.401	0		2
			R.DAEEWFHAK.S	1187.56	0		2
			R.SLLEGQDAK.M	1015.55	0		2
			R.VILEIDNAR.L	1069.61	0		2
			R.VLDELTLSK.T	1072.64	0		2
WP_003422090.1	proline racemase	proline			12.45	8.4	23
			K.EVSFLNVPAFLYK.E	1581.88	20		2
			K.FVYESILGTLFK.G	1471.83	20		2
			K.GEIVEETK.V	959.518	4.9		2
			K.TVDLVEIYDEPTHPEATYK.N	2276.13	20		3
			R.IVVGGIPNIK.G	1064.7	4.34		2
			R.TAIMLEPR.G	957.532	4.78		2
			K.EYLEENLDYLR.T	1483.72	0		2
			K.IEIQHPTLAHIK.T	1454.86	0		3
			K.NVVIFGQGQVDR.S	1358.73	0		2
			K.VADFNAVVPK.I	1114.64	0		2
			R.GDVTVVDGK.A	944.518	0		2
			R.SIQAIDSHTAGEATR.I	1583.79	0		2
			R.SIQAIDSHTAGEATR.I	1583.79	0		3
WP_009890640.1	DUF4342 domain-containing protein	DUF4342			14.55	6.75	23
			K.DVKDVVVDKK.E	1255.78	20		3
			K.ETMEEVFGK.D	1124.54	7.6		2
			K.NMITNAAK.D	917.5	9.11		2
			R.VPGATYAEAK.E	1061.58	20		2
			K.DVVVDKK.E	885.553	0		2
			K.VQNEEDGEIVDLGELNEEK.L	2215.06	0		2
			R.IKVQNEEDGEIVDLGELNEEK.L	2484.27	0		3
WP_003416656.1	glycine--tRNA ligase subunit alpha	glycine--tRNA			20	0	2
			K.QGCIMMQPYDIEK.G	1667.77	20		2
			K.GAGTMNPNTFLR.S	1305.65	0		2
WP_003416870.1	thiol reductase thioredoxin	thiol			20	0	23
			K.LAETYGDKIK.F	1220.7	20		3
			K.VLGLPTMAIYK.D	1260.75	20		2
WP_003416871.1	glycine/sarcosine/betaine reductase component B subunit	glycine/sarcosine/betaine			20	0	23
			K.DINFVGVIITNENVYLADKER.S	2478.32	20		3
			K.IEMQGVK.T	859.484	20		2
			K.KIEMQGVK.T	1015.61	20		2
[truncated: 987 more rows]
