# Supplementary material for: Characterizing metabolic drivers of Clostridioides difficile infection with activity-based hydrazine probes
Source: Front Pharmacol. 2023 Jan 26;14:1074619. doi: 10.3389/fphar.2023.1074619 (PMC9908766; doi:10.3389/fphar.2023.1074619)
Supplement: Supplementary file 5 [file DataSheet2.xlsx]

## Sheet: Summary
Supplementary Dataset 2. Comparison of average protein ratios for enrichment and competition experiments with probes 1 and 2 for Clostridioides difficile VPI10463 strain cultivated in BHIS. Additional datasets are available upon request.

## Sheet: Average ratios probes 1 and 2
VPI10463			630 orthologue			Heavy:Light Ratio
						Average
						Probe 1 (alkyl)		Probe 2 (aryl)
Accession	uniprot ID	symbol	uniprot ID	symbol	description	Enrichment	Competition	Enrichment	Competition
WP_003416871.1	A0A031WJU5	grdE	Q185M5	GrdE	glycine reductase complex component B subunits alpha and beta (Selenoprotein PB alpha/beta)	20	1.9375	20	20
WP_009902921.1	Q93QY9	flxD	Q187W1	flxD	flavodoxin	20	1.46	20	20
WP_009903219.1		hisC_1	Q182I8	CD630_25020	Putative pyridoxal phosphate-dependent transferase	20	-	20	20
WP_003418655.1	A0A031WHS9	speH	Q18A81	speH	S-adenosylmethionine decarboxylase proenzyme	20	5.115	-	20
WP_003430157.1	A0A031WHN3	trxB	Q186P9	trxB	Putative thioredoxin-disulfide reductase	20	1.305	20	13.6867
WP_009890721.1	A0A031WHB0	tdcB	Q182J9	tdcB	Threonine dehydratase II	20	1.6775	20	13.4725
WP_009903754.1			Q180R7	hemB	Delta-aminolevulinic acid dehydratase	20	1.61	20	11.2833
WP_003435867.1	A0A6N4MXQ7	metG	Q181D9	metG	Methionine--tRNA ligase	20	1.09	20	10.9233
WP_003439524.1	A0A031WIK3	argG	Q186Z6	argG	Argininosuccinate synthase	20	2.08	20	10.495
WP_003430934.1	A0A031WHV7	dnaK	Q182E8	dnaK	chaperone protein DnaK	20	1.4725	20	10.4375
WP_004454646.1	A0A031WJ42	sucD	Q185L7	sucD	Succinate-semialdehyde dehydrogenase (NAD(P)+)	20	-	20	10.1875
WP_009902397.1		NifU (iscU)	Q18BE3	CD630_12800	Fe-s iron-sulfur cluster assembly protein, nifu family	20	1.6	18.8333	8.20667
WP_003430704.1	A0A031WJ19	tkt	Q185J6	tkt1	Transketolase, N-terminal (Sedoheptulose-7-phosphate:D-glyceraldehyde-3-phosphate glycolaldehydetransferase)	20	1.91	-	8.03667
WP_004454390.1	A0A160X4Z4	bcrB	Q186V7	CD630_17490	Putative 2-hydroxyacyl-CoA dehydratase	20	1.3525	17.775	6.43
WP_009888725.1	A0A031WGL8	BN1095_630017	Q18A87	CD630_08930	Putative iron-dependent hydrogenase	20	-	20	6.3375
WP_003428474.1	A0A031WH65	fprA/norV	Q18B19	norV	Anaerobic nitric oxide reductase flavorubredoxin	20	1.5025	20	5.995
WP_003430159.1	A0A031WIJ0	BN1095_470139	Q186Q2	CD630_16930	Putative dinitrogenase iron-molybdenum cofacto	20	1.4125	16.86	5.6975
WP_003422090.1	A0A031WLJ9	prdF	Q17ZY4	CD630_32370	Proline racemase	20	1.5725	20	5.57
WP_003420374.1	A0A031WHY9	trxA	Q186P6	trxA	thioredoxin	20	1.21667	20	5.0125
WP_003430444.1	A0A031WKP7	asnC	Q185B5	asnC	Asparagine--tRNA ligase	20	-	-	4.44
WP_003416023.1	A0A069A1Z7	pduL_1/pduL/pduL_2	Q183B8	CD630_26830	Phosphate propanoyltransferase	20	1.5425	-	3.74
WP_009902143.1	A0A3T1G435	plfb	Q189V5	plfb	Formate acetyltransferase (Pyruvate formate-lyase)	20	1.4175	20	2.8225
WP_009889571.1	A0A069A9M6	iunH	Q186N9	iunH	Putative nucleoside hydrolase, IUNH family	20	1.4475	-	2.49
WP_009889131.1	A0A031WFI6	cbf2	Q18BM5	CD630_13570	Peptidylprolyl isomerase	20	1.3125	20	2.48
WP_003432446.1	A0A031WEL3	glmS	Q18CK9	glmS	Glutamine--fructose-6-phosphate aminotransferase [isomerizing]	20	1.36	20	2.2825
WP_009888223.1	A0A160W6B9	hadI	Q5U925	hadI	2-hydroxyisocaproyl-CoA dehydratase activator	20	1.445	17.515	2.23
WP_003422104.1	A0A031WJF8	prdA	Q17ZY9	prdA	D-proline reductase proprotein	20	1.4075	20	2.1875
WP_003430702.1	A0A031WIR0	tkt	Q185J5	tkt	Transketolase, central and C-terminal (Sedoheptulose-7-phosphate:D-glyceraldehyde-3-phosphate glycolaldehydetransferase)	20	1.455	20	2.1125
WP_003430209.1	A0A031WHU8	mrp	Q186T9	CD630_17300	Iron-sulfur cluster carrier protein	20	-	-	2.06
WP_009888019.1	A0A031WDM4	cooS	Q18CR1	cooS	Carbon monoxide dehydrogenase	20	1.47	20	2.055
WP_004454042.1	A0A449MTZ8	cdgr_03985	Q17ZX7	CD630_32320	UPF0597 protein CD630_32320	20	1.44	20	2.05
WP_003439110.1	A0A161KPQ0	E5F32_11340	Q188Y6	CD630_05440	Putative ornithine cyclodeaminase	20	1.155	-	2.05
WP_009897922.1	A0A125V8V1	ptsI	Q183J1	ptsI	Phosphoenolpyruvate-protein phosphotransferase	20	1.50667	20	1.9875
WP_003418888.1	A0A031WJ47	acdA	Q18AQ1	bcd2	butyryl-CoA dehydrogenase	20	1.475	20	1.9725
WP_009901809.1		hadB	Q188I1	hadB	Subunit of oxygen-sensitive 2-hydroxyisocaproyl-CoA dehydratase B	20	1.445	15.5	1.9575
WP_003427763.1	Q5U923	hadC	Q188I6	hadC	Subunit of oxygen-sensitive 2-hydroxyisocaproyl-CoA dehydratase C	20	1.4225	15.8625	1.915
WP_003421125.1	A0A031WAM3	rpsM	Q18CI0	rpsM	30S ribosomal protein S13	20	1.45	10.155	1.89
WP_009897862.1	A0A160X9W3	porA_3/NifJ/pfo	Q183B6	pfo	Pyruvate-ferredoxin oxidoreductase	20	1.4825	16.89	1.8775
WP_003438096.1	A0A031WGL1	ackA	Q18B36	ackA	Acetate kinase	20	1.475	20	1.865
WP_003420710.1	A0A031WCZ3	porB_2	Q18CK7	CD630_01170	Putative ferredoxin/flavodoxin oxidoreductase,beta subunit	20	1.49	18.325	1.85
WP_003429267.1	A0A031WI13	rplI	Q181R0	rplI	50S ribosomal protein L9	20	1.045	-	1.795
WP_003420711.1	A0A031WCI5	porC_3	Q18CK6	CD630_01180	Putative ferredoxin/flavodoxin oxidoreductase,gamma subunit	20	1.775	20	1.75333
WP_003434148.1	A0A031WLR9	tpiA/tpi	Q181T6	tpi	Triosephosphate isomerase	20	1.435	14.0975	1.745
WP_003423106.1	A0A031WJB8	guaB	Q185K9	guaB	Inositol-5'-monophosphate dehydrogenase (IMP dehydrogenase) (IMPDH) (IMPD)	20	1.3	20	1.7325
WP_009901787.1	A0A160WT52	ppaC	Q18D73	ppaC	Putative inorganic pyrophosphatase	20	1.32	20	1.7275
WP_003421122.1	A0A031WBS4	rpsK	Q18CI7	rpsK	30S ribosomal protein S11	20	1.86	-	1.69667
WP_003435635.1	A0A3T1GFQ9	pgi	Q180C9	pgi	Glucose-6-phosphate isomerase	20	1.335	-	1.685
WP_003429565.1	A0A031WJX1	pgk	Q181T8	pgk	Phosphoglycerate kinase	20	1.345	17.52	1.6725
WP_009903738.1			Q180P2	pyk	Pyruvate kinase	20	1.5875	20	1.6475
WP_003424083.1	A0A031WES6	erpA	Q187Q3	CD630_19430	Uncharacterized protein	20	1.91	20	1.64
WP_003427733.1	A0A031W9M8	rpoA	Q18CI5	rpoA	DNA-directed RNA polymerase subunit alpha	20	1.4925	-	1.615
WP_003421121.1	A0A031W9W6	rpsD	Q18CI6	rpsD	30S ribosomal protein S4	20	1.4125	5.385	1.61
WP_011860916.1	A0A500WW32	infC	Q189N1	infC	Translation initiation factor IF-3	20	1.405	-	1.6
WP_009904144.1	A0A069AXL0	mreB	Q18B05	mreB2	od shape-determining protein MreB	20	1.62333	20	1.58
WP_009896192.1	A0A160WY74	iscS_2	Q18BE4	iscS2	Cysteine desulfurase IscS	20	1.5475	20	1.58
WP_003421148.1	A0A031W9P0	rpsH	Q18CH0	rpsH	30S ribosomal protein S8	20	1.585	18.27	1.55
WP_003436882.1	A0A031WGH6	pepD	Q189Q4	pepD	Peptidase D, aminoacyl-histidine dipeptidase	20	1.3425	16.9167	1.545
WP_003434815.1	A0A031WAU8	adhE	Q18D77	adhE	Aldehyde-alcohol dehydrogenase	20	1.08	-	1.5275
WP_003421173.1	A0A031WA51	rplC	Q18CG0	rplC	50S ribosomal protein L3	20	1.405	18.115	1.5175
WP_009887887.1	A0A031WAP2	rplD	Q18CF9	rplD	50S ribosomal protein L4	20	1.54	3.43	1.505
WP_003429271.1	A0A031WGG4	lysN	Q181R8	CD630_36640	Putative aminotransferase	20	1.685	20	1.4925
WP_003419082.1	A0A031WIC7	rplU	Q18B24	rplU	50S ribosomal protein L21	20	1.41333	10.68	1.48
WP_011861888.1	A0A500UG65	prdB	Q17ZY6	prdB	Proline reductase (Selenocysteine)	20	1.34	15.65	1.4775
WP_003421180.1	A0A031WC55	rpsG	Q18CF5	rpsG	30S ribosomal protein S7	20	1.45	13.705	1.47
WP_009890867.1	A0A657JUJ4	ftsZ	Q182X9	ftsZ	Cell division protein FtsZ	20	1.34	-	1.47
WP_009888868.1	A0A031WJ40	mmgA/thlA	Q18AR0	thlA	Acetyl-CoA acetyltransferase	20	1.7625	-	1.435
WP_003419930.1	A0A160WBD4	rbr3A_1	Q18BZ4	CD630_14740	Putative rubrerythrin (Rr)	20	1.3975	15.13	1.43
WP_009889371.1	A0A031WCC0	rbr3A_2	Q18C45	CD630_15240	Putative rubrerythrin	20	1.42	17.2725	1.4275
WP_003421107.1	A0A031WA25	rplM	Q18CJ1	rplM	50S ribosomal protein L13	20	1.535	11.535	1.425
WP_003428889.1	A0A1Q9BMW3	E5F32_14780	Q187V4	CD630_19930	Putative decarboxylase	20	-	-	1.35
WP_003425341.1	A0A031WEK2	guaA	Q18CT8	guaA	GMP synthase [glutamine-hydrolyzing]	20	1.50667	20	1.28
WP_004454985.1	A0A069AL86	appA	Q183A6	appA	ABC-type transport system, oligopeptide-family solute-binding protein	20	1.4025	20	1.26333
WP_009897956.1	A0A487GC37	lytC_18	Q183M5	cwp2	Cell wall binding protein cwp2	20	1.44	20	1.17
WP_009895180.1	A0A031WDK1	proS	Q18CD2	proS1	Proline--tRNA ligase 1	20	-	-	1.02
WP_009897948.1	A0A125V8W5	cwp84	Q183M1	cwp84	Cell surface protein cwp84	20	1.28	-	0.975
WP_003421117.1	A0A031WA29	rplQ	Q18CI8	rplQ	50S ribosomal protein L17	20	1.105	-	0.945
WP_009895184.1	A0A031WDD4	cysS	Q18CD5	cysS	Cysteine--tRNA ligase	20	1.495	20	0.82
WP_003438808.1	A0A031WJY6	dapB/dapB1	Q17ZX1	dapB1	4-hydroxy-tetrahydrodipicolinate reductase	20	1.265	-	0.8
WP_003426939.1	A0A069A336	BN1095_620042	Q182V9	CD630_26260	UPF0210 protein CD630_26260	20	5.8375	-	-
WP_032506644.1	A0A657JW07	cdgr_03340	Q185Q7	CD630_21200	Putative 2-nitropropane dioxygenase	20	1.8	-	-
WP_003421415.1	A0A031WHB1	hbs/hup	Q180Z4	hupA	Non-specific DNA-binding protein HBsu signal recognition particle-like (SRP) component	20	1.64	-	-
WP_003438306.1	A0A031WCZ0	infB	Q18BH4	infB	Translation initiation factor IF-2	20	1.03333	-	-
WP_003420269.1	A0A031WHM7	terD	Q186I7	terD	Tellurium resistance protein terD	20	-	-	-
WP_003422749.1	A0A031WJI0	dltC	Q183T8	dltC	D-alanyl carrier protein	20	-	-	-
WP_004453775.1	A0A031WH83	trxA/trxA1	Q184M2	trxA1	Thioredoxin	20	-	-	-
WP_009898301.1	A0A031WK46	eno	Q181T5	eno	Enolase	19.16	1.395	14.905	1.7525
WP_003431407.1	A0A031WAD6	ldhA	Q188H7	ldhA	D-lactate dehydrogenase	18.965	1.4775	16.935	1.995
WP_009895182.1	A0A031WE17	proS	Q18CD7	proS2	Proline--tRNA ligase 2	18.53	1.4425	18.2775	0.685
WP_003436178.1	A0A031WAZ7	fusA	Q18CF4	fusA	Elongation factor G	18.425	1.4275	17.4825	1.54
WP_003417090.1	A0A069AUG4	tig	Q180E9	tig	Trigger factor	18.0567	1.3425	20	1.88
WP_009901692.1	A0A031WDG6	groL	Q18CT5	groL	60 kDa chaperonin	17.87	1.2925	20	1.49
WP_003416451.1	A0A031WH02	yabJ	Q182K0	CD630_25130	Putative translation inhibitor endoribonuclease	17.66	1.485	13.84	1.38
WP_003424535.1	A0A031WJ99	tsf	Q185S9	tsf	Elongation factor Ts	17.225	1.485	20	1.93
WP_003427766.1	A0A031W9Y8	hadA	Q188I3	hadA	Isocaprenoyl-CoA:2-hydroxyisocaproate CoA-transferase	17.1125	1.38	11.9075	1.8925
WP_003436400.1	A0A450R375	E5F43_14400	Q186H7	CD630_16230	Putative oxidoreductase	17.055	1.35	20	1.68
WP_003424537.1	A0A031WIT6	rpsB	Q185S8	rpsB	30S ribosomal protein S2	17.0325	1.4425	15.0225	1.5575
WP_009887863.1	A0A160W555	tuf_2/tuf1	Q18CE4	tuf1	Elongation factor Tu	16.9725	1.42	10.99	1.605
WP_003438030.1	A0A031WG42	BN1095_450028	Q18AY4	CD630_11250	Nitroreductase-family protein	16.6025	1.5	17.53	1.6275
WP_003420866.1	P27346	gluD	Q18CS0	gluD	Glutamate dehydrogenase	16.13	1.5625	16.1375	2.0975
WP_003438357.1	A0A031WH88	aspB	Q18BK6	aspB	Aminotransferase	15.06	1.4225	20	4.0725
WP_003421962.1	A0A031WJM9	gapA	Q181T9	gapA	Glyceraldehyde-3-phosphate dehydrogenase	14.98	1.415	9.685	1.51
WP_003421158.1	A0A031W9Y6	rpmC	Q18CG9	rpmC	50S ribosomal protein L29	14.65	1.72	-	6.405
WP_003417352.1	A0A031WAY2	fba	Q188J1	fba	Fructose-1,6-bisphosphate aldolase	14.62	1.4325	8.225	1.7175
WP_003421166.1	A0A031W9P7	rpsS	Q18CG2	rpsS	30S ribosomal protein S19	14.04	1.12	-	0.83
WP_009898069.1	A0A125VAJ3	adhE_2	Q184F6	adhE1	Aldehyde-alcohol dehydrogenase	13.9725	1.185	20	1.54
WP_003427760.1	A0A031W9Z3	etfB	Q188I4	etfB1	Beta-subunit of electron transfer flavoprotein	13.375	1.4475	9.765	2.045
WP_003418660.1	A0A031WG62	cspA	Q18A83	cspA	Cold shock protein	12.67	1.05	-	2.025
WP_009903275.1			Q182U6	CD630_26130	Putative peptidase, M24 family	12.41	1.365	1.28	2.065
WP_003421187.1	A0A031WA97	rplJ	Q18CE8	rplJ	50S ribosomal protein L10	11.83	1.41	16.41	1.735
WP_009897960.1	Q9AEM3	slpA	Q183M8	slpA	Precursor of the S-layer proteins	10.76	1.315	7.2625	1.5075
WP_003425850.1	A0A031WHJ3	atpD	Q180W5	atpD	ATP synthase subunit beta	10.67	1.285	13.1833	2.31
WP_003417347.1	A0A031WA87	etfA	Q188I8	etfA1	Alpha-subunit of electron transfer flavoprotein	8.215	1.385	10.8675	1.9
WP_003427762.1	A0A160W849	acdB	Q188I5	acdB	Acyl-CoA dehydrogenase, short-chain specific	7.8225	1.42	7.855	2.0325
WP_003421163.1	A0A069A3T9	rpsC	Q18CG5	rpsC	30S ribosomal protein S3	7.8175	1.45	2.34	1.42
WP_003421367.1	A0A031WI77	atpA	Q180W8	atpA	ATP synthase subunit alpha	7.47	1.34	20	1.9475
WP_003421175.1	A0A069APE8	rpsJ	Q18CF6	rpsJ	ribosomal protein S10	4.1	1.4025	-	1.37333
WP_003429132.1	A0A031WC37	pfkA	Q180P4	pfkA	ATP-dependent 6-phosphofructokinase	2.21	-	-	1.35
WP_003421137.1	A0A031W9X5	rpmD	Q18CH8	rpmD	50S ribosomal protein L30	1.65	1.39	-	-
WP_003421156.1	A0A031W9P1	rpsQ	Q18CG8	rpsQ	30S ribosomal protein S17	1.565	1.28	-	0.89
WP_003421168.1	A0A031W9Z1	rplB	Q18CG3	rplB	50S ribosomal protein L2	1.5325	1.18	1.3225	1.25
WP_003429730.1	A0A160W8Z0	rplT	Q189N4	rplT	50S ribosomal protein L20	1.46	0.99	1.0075	1.2575
WP_003429729.1	A0A031WFF6	rpmI	Q189N0	rpmI	50S ribosomal protein L35	1.34	1.4125	0.82	-
WP_003428740.1	A0A069AT81	accB	Q187Q0	accB	Biotin carboxyl carrier protein of acetyl-CoA carboxylase	0.965	1.725	1.1975	1.0625
WP_003425597.1	A0A069AHU3	pycA	Q18CA4	pycA	Pyruvate carboxylase	0.8375	1.2175	1.075	1.25
WP_003431873.1	A0A031WLJ3	prdC	Q17ZZ2	prdC	Putative electron transfer protein	-	1.45	20	20
WP_003436885.1	A0A031WFU6	argS	Q189Q7	argS	Arginine--tRNA ligase	-	2.23	-	20
WP_003435334.1	A0A031WEA4	accC	Q187P8	accC	Biotin carboxylase	-	1.82	-	20
WP_009891056.1	A0A0H3NEM5	secA2	Q183M9	secA2	Protein translocase subunit SecA 2	-	1.46	-	20
WP_009897501.1	A0A7G7NJJ1	DSM105001_02571	Q185J2	CD630_23180	Putative phosphohexomutase	-	1.24	-	20
WP_003434033.1	A0A031WI80	trxB	Q185Q5	trxB2	thioredoxin reductase	-	-	-	20
WP_003437525.1	A0A031WD51	ndx1_1	Q189Y6	CD630_07900	Putative hydrolase, NUDIX family	-	-	-	20
WP_003438099.1	A0A031WGL7	fabH	Q18B40	fabH	3-oxoacyl-[acyl-carrier-protein] synthase 3	-	-	-	20
WP_003416870.1	A0A031WJD4	trxA/trxA2	Q185M8	trxA2	Thioredoxin	-	-	-	20
WP_009895216.1	A0A031WCK4	secA	Q18CN0	secA1	Protein translocase subunit SecA 1	-	-	-	20
WP_003420702.1	A0A031WCI2	buk	Q18CK3	buk	Probable butyrate kinase	-	1.68	20	13.64
WP_003438917.1	A0A346WRW8	cdgr_06650	Q189E0	CD630_05920	Uncharacterized protein	-	1.6325	-	13.48
WP_009890640.1	A0A031WGT6	BN1096_520272	Q182C1	CD630_24340	DUF4342 domain-containing protein	-	-	-	13.0867
WP_003439345.1	A0A031WB55	deoC	Q18C22	deoC	Deoxyribose-phosphate aldolase	-	-	-	11.52
WP_004454864.1						-	-	20	10.54
WP_025992040.1			Q181T7	gpmI	2,3-bisphosphoglycerate-independent phosphoglycerate mutase	-	1.425	-	10.495
WP_003436863.1	A0A6N3EL63	gapN	Q189C4	gapN	Glyceraldehyde-3-phosphate dehydrogenase (NADP(+)) (GADPH)	-	1.13	20	10.305
WP_009901578.1			Q18CJ7	aspC	Aminotransferase	-	1.74	-	7.81667
WP_009903252.1			Q182N4	CD630_25470	DUF4091 domain-containing protein	-	1.54	-	7.14
WP_009889064.1	A0A031WD86	alaS	Q18BE7	alaS	Alanine--tRNA ligase	-	1.86	-	6.845
WP_003429485.1	A0A031WA07	rpoC	Q18CF3	rpoC	DNA-directed RNA polymerase subunit beta'	-	1.57	20	6.4425
WP_003437561.1	A0A031WDP1	BN1095_480039	Q18A06	CD630_08070	Uncharacterized protein	-	1.77	-	6.415
WP_004454140.1	A0A031WF33	aspS	Q183H4	aspS	Aspartate--tRNA ligase	-	1.525	20	6.225
WP_009892576.1	A0A449S6H8	nroR	Q18CR6	CD630_01760	Putative oxidoreductase, NAD/FAD binding subunit	-	-	20	5.9075
WP_003418513.1	A0A069A775	rbr	Q18A24	rbr	Rubrerythrin	-	-	20	3.945
WP_009902000.1			Q189B8	thrS	Threonine--tRNA ligase	-	1.375	20	3.835
WP_003420701.1	A0A031WCY9	ptb	Q18CK4	ptb	Phosphate butyryltransferase	-	1.58	-	3.67
WP_009888867.1	A0A031WJM1	etfB	Q18AQ6	etfB3	Electron transfer flavoproteins subunit beta	-	1.83	20	2.97
WP_004454961.1	A0A031WB31	malE	Q182Y0	CD630_26450	ABC-type transport system, sugar-family extracellular solute-binding protein	-	-	-	2.97
WP_009889364.1	A0A031WA86	tyrS	Q18C40	tyrS	Tyrosine--tRNA ligase	-	1.5075	20	2.95
WP_009901581.1			Q18CJ6	nrdD	anaerobic ribonucleoside triphosphate reductase	-	1.4375	20	2.715
WP_003421186.1	A0A031WC51	rplL	Q18CE7	rplL	50S ribosomal protein L7/L12	-	1.42333	-	2.4
WP_003438103.1	A0A031WGM3	fabF	Q18B43	fabF	3-oxoacyl-[acyl-carrier-protein] synthase 2	-	1.25	20	2.39667
WP_009903676.1			Q180A1	valS	Valine--tRNA ligase	-	1.13	-	2.29667
WP_009903701.1	A0A381KK09	csdB_2	Q180C6	pflD	Pyruvate formate-lyase	-	-	-	2.16
WP_009902717.1			Q186P0	CD630_16840	Putative radical SAM superfamily protein	-	1.515	-	2.145
WP_003434191.1	A0A346WRC5	E5F43_11720	Q18D70	ppiB	Peptidyl-prolyl cis-trans isomerase	-	1.34	-	2.1
WP_003422063.1	A0A031WJH1	dapA/dapA3	Q17ZX0	dapA	4-hydroxy-tetrahydrodipicolinate synthase	-	-	-	2.09
WP_003421197.1	A0A069ASQ1	thyX	Q18CE1	thyX	Flavin-dependent thymidylate synthase	-	1.96	-	2.07
WP_003422953.1	A0A069AKK1	glyA	Q183G0	glyA	Serine hydroxymethyltransferase	-	1.355	-	2.05
WP_003432442.1	A0A031WDH6	porA_2	Q18CK8	CD630_01160	Putative ferredoxin/flavodoxin oxidoreductase,alpha subunit	-	1.56667	18.0733	2.01667
WP_003432462.1	A0A031WEM0	metK	Q18CL7	metK	S-adenosylmethionine synthase	-	1.47	-	1.98667
WP_003436174.1	A0A031WAF8	rpoB	Q18CF1	rpoB	DNA-directed RNA polymerase subunit beta	-	1.475	20	1.9175
WP_003424103.1	A0A031WE94	BN1095_310042	Q187R2	CD630_19530	F420_ligase domain-containing protein	-	1.39	-	1.87667
WP_003434936.1	A0A031WFG0	secA_2	Q181H5	CD630_35710	Uncharacterized protein	-	1.63333	20	1.81
WP_003421448.1	A0A031WIC4	prs	Q181B3	prs	Ribose-phosphate pyrophosphokinase	-	1.31	-	1.79667
WP_003429004.1	A0A031WJ38	yheS_5	Q188D7	CD630_20680	ABC-type transport system, ATP-binding protein	-	1.48	-	1.71
WP_003438316.1	A0A031WFI5	pnp	Q18BI4	pnp	Polyribonucleotide nucleotidyltransferase	-	1.355	20	1.695
WP_003422058.1	A0A161KSB2	sdaB	Q17ZW7	sdaB	L-serine dehydratase	-	1.665	-	1.68
WP_003428486.1	A0A031WH48	rnfB	Q18B01	rnfB	Ion-translocating oxidoreductase complex subunit B	-	1.505	-	1.67
WP_009903412.1			Q184L7	CD630_30280	Putative phosphosugar isomerase	-	1.65	-	1.65
WP_004454939.1	A0A2A4BRI4	ileS	Q182V2	ileS	Isoleucine--tRNA ligase	-	1.54	20	1.61333
WP_003426456.1	A0A069AGH3	ydeM	Q183I6	CD630_27490	Putative radical SAM-family protein	-	-	-	1.61
WP_003433890.1	A0A031WIP7	ftnA	Q185Y2	ftnA	Ferritin	-	1.38	20	1.605
WP_009901585.1			Q18CL0	glmM	Phosphoglucosamine mutase	-	1.7	0.26	1.59
WP_009897829.1	A0A160XAJ4	murF	Q182Y9	murF	UDP-N-acetylmuramoyl-tripeptide--D-alanyl-D-alanine ligase	-	-	-	1.58
WP_009901573.1			Q18CH9	adk	Adenylate kinase	-	1.5475	20	1.5775
WP_003435673.1	A0A031WBT3	rplE	Q18CH2	rplE	50S ribosomal protein L5	-	1.475	15.82	1.5575
WP_009888533.1	A0A031WFV7	fhs	Q189R2	fhs	Formate--tetrahydrofolate ligase	-	-	-	1.5
WP_003437537.1	A0A031WED6	pmpR	Q189Y9	CD630_07950	Probable transcriptional regulatory protein CD630_07950	-	1.54667	-	1.45
WP_003436176.1	A0A069AMB0	rpsL	Q18CF2	rpsL	30S ribosomal protein S12	-	1.205	1.235	1.43
WP_025992020.1			Q189L6	CD630_06720	GTP cyclohydrolase 1 type 2 homolog	-	1.775	20	1.41333
WP_009903195.1			Q182B8	glyS	Glycine--tRNA ligase beta subunit	-	1.25333	20	1.37
WP_003421160.1	A0A031WBT7	rplP	Q18CG4	rplP	50S ribosomal protein L16	-	1.14	1.1	1.365
WP_004454662.1	A0A069ALV0	tauA	Q185N5	CD630_23650	ABC-type transport system,nitrate/sulfonate/taurine extracellular solute-binding protein	-	-	-	1.36
WP_009888722.1	A0A031WFZ5	speE	Q18A85	speE	Polyamine aminopropyltransferase	-	-	-	1.34
WP_003420072.1	A0A160WCH6	gltD/aspB_1	Q18C58	aspB1	Putative glutamate synthase	-	1.36333	-	1.3175
WP_003421155.1	A0A031WA45	rplN	Q18CG7	rplN	50S ribosomal protein L14	-	1.305	-	1.3
WP_009887891.1	A0A031WA47	rplV	Q18CG1	rplV	50S ribosomal protein L22	-	1.49667	-	1.295
WP_003427723.1	A0A031WAN4	rplX	Q18CG6	rplX	50S ribosomal protein L24	-	1.47	-	1.295
WP_003428573.1	A0A031WK27	etfA	Q18AQ5	etfA3	Electron transfer flavoprotein subunit alpha	-	1.3975	20	1.29
WP_003438324.1	A0A031WHA0	dapG	Q18BI5	dapG	Aspartokinase	-	-	-	1.29
WP_009892314.1	A0A160WLW5	yedF	Q181S1	CD630_36670/yedF	Selenium metabolism protein yedf	-	-	-	1.28
WP_003439900.1	A0A2A3K3G5	pip	Q184M8	pip	Proline iminopeptidase	-	1.7	-	1.275
WP_011861169.1	A0A069A9S9	rnjA	Q18BF6	rnj	Ribonuclease J	-	-	-	1.25
WP_003417105.1	A0A031WCN0	clpX	Q180E8	clpX	ATP-dependent Clp protease ATP-binding subunit ClpX	-	1.47	-	1.23
WP_009902261.1			Q18AS5	CD630_10720	M18 family aminopeptidase	-	-	-	1.21
WP_003419624.1	A0A031WFD5	cspD/cspB/cspA	Q18BL9	cspB	Cold shock protein CspB	-	1.295	8.96	1.17667
WP_009903399.1			Q184K9	CD630_30180	Oxidoreductase	-	-	-	1.155
WP_003416416.1	A0A031WHJ5	rsfS	Q182L0	rsfS	Ribosomal silencing factor RsfS	-	-	-	1.15
WP_003430084.1	A0A031WHM2	yceH	Q186J3	CD630_16390	Putative tellurite associated resistance protein	-	-	-	1.12
WP_003434963.1	A0A069AN77	lysS	Q181F2	lysS	Lysine--tRNA ligase	-	-	-	1.11
WP_003431138.1	A0A031WAQ2	rpe/rpe1	Q182R3	rpe1	Ribulose-phosphate 3-epimerase	-	1.375	-	1.1
WP_003434417.1	A0A031WD18	lrtA/hpf	Q18CN1	hpf	Ribosome hibernation promoting factor	-	-	-	1.06667
WP_003421188.1	A0A031WA03	rplA	Q18CE9	rplA	50S ribosomal protein L1	-	1.7775	10.85	1.06
WP_003438268.1	A0A031WD25	codY	Q18BE1	codY	GTP-sensing transcriptional pleiotropic repressor CodY	-	1.45	-	1.02
WP_003437840.1	A0A031WJE6	upp	Q180X8	upp	Uracil phosphoribosyltransferase	-	1.22	-	1.01
WP_003418897.1	A0A031WJD8	mmgB/hbd	Q18AQ7	hbd	3-hydroxybutyryl-CoA dehydrogenase	-	1.78333	12.12	1
WP_003435963.1	A0A3T1G4L5	htpG	Q18D10	htpG	Heat shock protein 90 (Heat shock protein HtpG)(High temperature protein G)	-	-	-	1
WP_003435581.1	A0A031WF58	gltX	Q18CD6	gltX	Glutamate--tRNA ligase	-	-	-	0.99
WP_003438795.1	A0A6N2ZWP2	PDLFYP43_02025	Q17ZW3	CD630_32210	Putative peptidase, M20D family	-	-	20	0.85
WP_003417102.1	A0A031WCE1	clpP	Q180F0	clpP	ATP-dependent Clp protease proteolytic subunit	-	-	-	0.84
WP_025992033.1			Q182F1	grpE	Protein GrpE	-	1.695	-	0.79
WP_009902521.1			Q18BY9	cwp20	Putative cell surface protein putative penicillin-binding protein cwp20	-	1.56333	20	0.77
WP_003435562.1	A0A031WFN9	serS	Q18C97	serS	Serine--tRNA ligase	-	1.36	-	0.71
WP_009897314.1	A0A031WIB6	msrAB/msrA	Q185V3	msrAB/msrA	Multifunctional fusion protein	-	-	20	0.7
WP_003419350.1	A0A031WDB1	rplS	Q18BC1	rplS	50S ribosomal protein L19	-	1.38667	-	0.68
WP_003439443.1	A0A069AGX4	bcp	Q187D3	bcp	Putative thiol peroxidase	-	-	-	0.64
WP_009897952.1	A0A125V9F8	cwp66	Q183M7	cwp66	Cell surface protein cwp66	-	-	-	0.64
WP_003420522.1	A0A031WGW1	rpsF	Q181R5	rpsF	30S ribosomal protein S6	-	1.73	20	-
WP_003428488.1	A0A069AUQ9	rnfC	Q18AZ5	rnfC	Ion-translocating oxidoreductase complex subunit C	-	1.705	20	-
WP_003420907.1	A0A031WEJ8	groS	Q18CT6	groS	10 kDa chaperonin	-	1.32	20	-
WP_003419074.1	A0A160WA21	cdgr_10610	Q18B18	CD630_11580	Putative radical SAM-superfamily protein	-	-	20	-
WP_003427105.1	A0A031WAR0	asnA	Q183C9	asnA	Aspartate--ammonia ligase	-	-	20	-
WP_003420706.1	A0A031WEK9	BN1095_210006	Q18CK1	CD630_01150	Putative 4Fe-4S ferredoxin, iron-sulfur binding domain protein, delta subunit	-	-	20	-
WP_009903471.1			Q184T6	CD630_30990	Peptidase M20 domain-containing protein 2	-	-	20	-
WP_003421138.1	A0A031WBS9	rpsE	Q18CH3	rpsE	30S ribosomal protein S5	-	-	11.99	-
WP_004453528.1	A0A069A180	rpsA	Q18AI4	rpsA	30S ribosomal protein S1	-	4.52	-	-
WP_009903415.1			Q184L8	CD630_30300	PTS system, glucose-like IIBC component	-	1.99	-	-
WP_003421389.1	A0A031WJF2	prfA	Q180Y2	prfA	Peptide chain release factor 1	-	1.61	-	-
WP_003435668.1	A0A031WA41	rplF	Q18CH5	rplF	50S ribosomal protein L6	-	1.51333	-	-
WP_003421397.1	A0A031WHA1	rpmE	Q180Y7	rpmE	50S ribosomal protein L31	-	1.42	-	-
WP_003437464.1	A0A031WF96	cshA	Q189V7	CD630_07610	Putative ATP-dependent RNA helicase	-	1.41	-	-
WP_009903017.1	A0A449RV42	thrC	Q185Q9	thrC	Threonine synthase	-	1.37	-	-
WP_003421189.1	A0A031WAF0	rplK	Q18CE5	rplK	50S ribosomal protein L11	-	1.36	-	-
WP_003428343.1	A0A031WCV8	BN1095_790035	Q18BA8	CD630_12470	Uncharacterized protein	-	1.29	-	-
WP_009903660.1	A0A031WKF5	dapH	Q17ZX2	dapH	2,3,4,5-tetrahydropyridine-2,6-dicarboxylate N-acetyltransferase	-	1.19	-	-
WP_003421135.1	A0A031W9N6	rplO	Q18CH7	rplO	50S ribosomal protein L15	-	1.175	-	-
WP_009897942.1	A0A069AIN2	cwp	Q183L9	cwp6	Putative N-acetylmuramoyl-L-alanine amidase,autolysin cwp6	-	1.12	-	-
WP_003428216.1	A0A031WF54	rny	Q18BJ3	rny	Ribonuclease Y	-	1.11	-	-
WP_003422895.1	A0A031WE44	ptsH	Q183J2	ptsH	PTS system, HPr protein	-	1.1	-	-
WP_009903330.1			Q183N3	CD630_27970	Putative calcium-binding adhesion protein	-	1.0925	-	-
WP_003419338.1	A0A031WDT7	rpsP	Q18BB8	rpsP	30S ribosomal protein S16	-	1.07	-	-
WP_009902686.1			Q186K4	CD630_16500	ABC-type transport system, iron-family extracellular substrate-binding protein	-	1.06	-	-
WP_003434259.1	A0A031WGF4	purA	Q181Q7	purA	Adenylosuccinate synthetase	-	1.04	-	-
WP_003418375.1	A0A031WHQ6	BN1095_430071	Q189T0	CD630_07340	Uncharacterized protein	-	0.96	-	-
WP_003422204.1	A0A031WEF1	greA	Q181F4	greA	Transcription elongation factor GreA	-	0.8	-	-
